# Supplementary material for: Interpreting roles of mutations associated with the emergence of S. aureus USA300 strains using transcriptional regulatory network reconstruction
Source: bioRxiv preprint, doi:10.1101/2023.07.26.550757, version 2 (2024-05-15)
Supplement: Supplementary Table 2 [file 550757_file03.xlsx]

## Sheet: DBGWAS Result
CompId	NodeId	AlleleFreq	Pheno0Count	Pheno0TotalCount	Pheno1Count	Pheno1TotalCount	NACount	NATotalCount	Significant?	p-value	q-Value	EstEffect	WaldStat	Sequence	SequenceLength	Annotations(sep=~~~)
0	n135	1566	209	589	1357	1441	0	0	No	0.95198	0.999878	0.000683363	-0.0600472	AATCTTACTTTGGCACATGGTAGAAAAAAAAGATAACCAGCCTCATACAGATTA	54
0	n1880	51	51	589	0	1441	0	0	No	NA	NA	NA	NA	CATGGTAGAAGAAAAAGATAACCAGCCTCAAAAGCTTTATCACTTATTATTGATAATTTTGACTGCATCATTAATAATATTTTTTGTTAATTGAGCTGCATCGACTGTGTCAGCTAATCTAGTACTTTGTCCACTCCAAATATGGGTCCACTCAGTATATCCTTTCTCCAAAGCAGATTTTCGTATTTGCGTTGTTAATTGATTTTGTAAAGGATAAGGAGGCACCTGTTTTGAATATAAATTCATATTGTGTACAAATTCATTCATAATTCCGCGAGCCAATTTGCCACTAAATACATTTGTCAGTATTGTATCTGTTTCAGAGCTTTCAATAATTTCATTTTTGATTTTGTCATCAGCGCCACTTTCATTCGTTGTTAAATAAGCAGTACCTAATT	398
0	n1881	1	1	589	0	1441	0	0	No	NA	NA	NA	NA	CATGGTAGAAGAAAAAGATAACCAGCCTCATACCGATTACCTACACATTTTCAAACTACAAGAA	64	USA300HOU_RS00290;DBGWAS_general_tag=hypothetical_protein
0	n12001	41	13	589	28	1441	0	0	No	NA	NA	NA	NA	TAATCTGTATGAGGCTGGTTATCTTTTTTTCTACCATGTGCCAAAGTAAGATT	53
0	n15899	52	52	589	0	1441	0	0	No	NA	NA	NA	NA	CTTCAAATCTTACTTTGGCACATGGTAGAAGAAAAAGATAACCAGCCTCA	50	USA300HOU_RS00185;DBGWAS_general_tag=hypothetical_protein
0	n19785	51	51	589	0	1441	0	0	No	NA	NA	NA	NA	TAATAGCTCGCTATTAATGTTTTTATAATAATAAAGAAAAGTAAAGAAGGTGAAAAAAGTG	61	TCH1516intergenic_61153-61682
0	n19786	1328	7	589	1321	1441	0	0	No	0.93151	0.999878	-0.00456902	0.0860999	TAATAGCTCGCTATTAATGTTTTTATAATAGTAAAGAAAAGTAAAGAAGGTGAAAAAAGTG	61	TCH1516intergenic_61153-61682
0	n26203	1	0	589	1	1441	0	0	No	NA	NA	NA	NA	TTCTATTAAAAAAATAAGTCACTTATATATAGTCAAGTCCAGACTCCTGTGTA	53
0	n26204	1323	7	589	1316	1441	0	0	No	0.591091	0.999878	-0.0139985	0.536945	TTCTATTAAAAAAATAAGTCACTTATATATCAACTTAT	38
0	n26205	50	50	589	0	1441	0	0	No	NA	NA	NA	NA	CAACATTATCAGAGGAATTAAAATTTTATTAAAAAAATAAGTGACTTATATATCAACTTAT	61
0	n26380	1326	7	589	1319	1441	0	0	No	0.828843	0.999878	-0.00746738	0.215994	AAAAAATAAGTCACTTATATATCAACTTATTAAGGGAGTCCTA	43	TCH1516intergenic_60717-60793
0	n26381	51	51	589	0	1441	0	0	No	NA	NA	NA	NA	AAAAAATAAGTGACTTATATATCAACTTATTAAGGGAGTTCTATACTCCCTTTTTTAATGCAATTGTTTTTATAAACAATGACTTTATTTATAGTCTAAGATGCTTACTTCGATGTTTCTAATGACATCTCGCGAAGCATCAAAACTGTTATTAATATAACCATTTTTATTAATCGATAAAGAAATCGATTGGCCTGCATAAAAATTTAATTTCTAGTTAAACTTAGAATAATAATTTATAAATCATCAATGATTTGAAGTAAGATTGTCAAAATGATAAATTATTTCCTCAAAATTTTTACTTTTATTAATAACTTTATACTCATTTGAATTAGTGAAAT	341
0	n27347	1379	58	589	1321	1441	0	0	Yes	0.000527085	0.028252	-0.100336	3.5174	TCATCAGCAAGTATCCATACAAATAAAGGTAAAATGACAGGTGCGAAAAAGATACTTAAATAACTCAATGCTGATAAAACGTAACTATTGTCATTTTTATGCATATTACTATTTGTATTTTCCACTTTTTTCACCTTCTTTACTTTTCTTTA	152	USA300HOU_RS00260;DBGWAS_general_tag=hypothetical_protein
0	n28661	1	1	589	0	1441	0	0	No	NA	NA	NA	NA	CAACATTATCAGAGGAATTAAAATTTTATTTAAAAAATAAGTGACTTATATATCAACTTAT	61
0	n38160	1	0	589	1	1441	0	0	No	NA	NA	NA	NA	ATAAGTTGATATATAAGTGACTTATTTTTTAATAGAATTTTAATTCCTCTGTTA	54	USA300HOU_RS00260;DBGWAS_general_tag=hypothetical_protein
0	n41999	1324	7	589	1317	1441	0	0	No	0.561732	0.999878	-0.016581	0.580083	ATATATAAGTGACTTATTTTTTTAATAGAATTTTAATTCCTCTGTTA	47
0	n51688	1328	7	589	1321	1441	0	0	No	0.93151	0.999878	-0.00456902	0.0860999	TATAGTTTTTATTAAAGATTCCAATTTCTTATTATTATCTGTAAGAGAAAGATTCTCTGGAAATATAAGTACACCGTAGTTATAGTTATCTTCGACAGTGAAGTCAGAAGCTTTTAACTTCAAATCGTCTTGGCTTTTTAAAAATGAACCATTAACAATATCTTCAATATAAGTACCTTTTCCAATAAATTTCGCTACTCACTTCGATTGTGGATGATAATATAAATT	228	TCH1516intergenic_61153-61682
0	n71381	1	0	589	1	1441	0	0	No	NA	NA	NA	NA	GATGAACCAACATCAGAACATGGCAAAAAAAGCATTCATTAATCATATTATGACT	55
0	n71382	1327	7	589	1320	1441	0	0	No	0.901268	0.999878	-0.00524514	0.124039	GATGAACCAACATCAGAACATGGCAAAAAAGCATTCATTAATCATATTATGACT	54	USA300HOU_RS00260;DBGWAS_general_tag=hypothetical_protein
0	n84133	51	51	589	0	1441	0	0	No	NA	NA	NA	NA	AATAAAATTTTAATTCCTCTGATAATGTTGAGAATATATAATATTAAAGCAATTAAAAAGAAT	63	USA300HOU_RS00260;DBGWAS_general_tag=hypothetical_protein
0	n89644	51	51	589	0	1441	0	0	No	NA	NA	NA	NA	TATATAATATTAAAGCAATTAAAAAGAATACAATAGCAATGATTAAAGCAATAACAAATATTAATAATTGATGATCAAACGGTTTATCAAAGACTCCTTTTGAAAAAATAAAAATTCCTCTGCCTACACAAAAACTAATCCATGTCATAATATGATTCCCTAATGCTTTTTTACCATGTCCTGATGTTGGCTCATCAGCAAGTATCCATACAAATAAAGGT	221	USA300HOU_RS00260;DBGWAS_general_tag=hypothetical_protein
0	n89645	1327	7	589	1320	1441	0	0	No	0.325513	0.999878	-0.0424432	0.983245	TATATAATATTAAAGCAATTAAAAAGAATATAATAG	36	USA300HOU_RS00260;DBGWAS_general_tag=hypothetical_protein
0	n89646	1	0	589	1	1441	0	0	No	NA	NA	NA	NA	TCAAGATATATAATATTAAAGCAATTAAAAGAATATAATAGTAATAATTAAAAGAA	56	USA300HOU_RS00260;DBGWAS_general_tag=hypothetical_protein
0	n93583	1327	7	589	1320	1441	0	0	No	0.325513	0.999878	-0.0424432	0.983245	TTCTTTTAATTATTACTATTATATTCTTTTTAATTGCTTTAATAT	45	USA300HOU_RS00260;DBGWAS_general_tag=hypothetical_protein
0	n94829	1	0	589	1	1441	0	0	No	NA	NA	NA	NA	TAATTCCTCTGTTAATGTTCAAGATATATATATTAAAGCAATTAAAAAGAATATAATAG	59	USA300HOU_RS00260;DBGWAS_general_tag=hypothetical_protein
0	n95428	3	3	589	0	1441	0	0	No	NA	NA	NA	NA	AAGTCATTGAGATCATGAAAGAAAAACAGAATGGAGAAAAATAGTATGAACATCAATCGATACATCA	67
0	n98845	1325	7	589	1318	1441	0	0	No	0.649694	0.999878	-0.0139093	0.453941	AAGAAATTGGAATCTTTAATAAAAACTATACTATTTACAGGTAAACGATATCAATATACTT	61	TCH1516intergenic_61153-61682
0	n131165	1328	7	589	1321	1441	0	0	No	0.93151	0.999878	-0.00456902	0.0860999	AAAAGAATATAATAGTAATAATTAAAAGAATGCTAAATATTAATAATTGATGATCCAAAGGTTTATCAAAGACTTCTTTAGAAAAAATAAATGCCAATCTACCTATAAAAA	111	USA300HOU_RS00260;DBGWAS_general_tag=hypothetical_protein
0	n137171	51	51	589	0	1441	0	0	No	NA	NA	NA	NA	TTCACTTTTTTTAATAATAATAAAATTATCTATTTTTCTATATTTAGGTTTTACCATACGATATTCATCATTTTTATTTAATGTTATGTAAAAATCAGTTAAATCATTTTCATTAATAAGTCTTAGCGAATCATCTGCCATAATTTTTATTATAAAAATTGATTTTAATATATGCACTATAAAGATACAGATATTTAAAAACAAGAGACACTTATACAAATGTTTTGAAT	230
0	n149321	1327	7	589	1320	1441	0	0	No	0.806556	0.999878	-0.0100872	0.244834	TATATATCTTGAACATTAACAGAGGAATTAAAATTCTATTAAAAAA	46	USA300HOU_RS00260;DBGWAS_general_tag=hypothetical_protein
0	n151170	1328	7	589	1321	1441	0	0	No	0.93151	0.999878	-0.00456902	0.0860999	TAATTCCTCTGTTAATGTTCAAGATATATAATATTAAAGCAATTAAAA	48	USA300HOU_RS00260;DBGWAS_general_tag=hypothetical_protein
0	n189986	1328	7	589	1321	1441	0	0	No	0.93151	0.999878	-0.00456902	0.0860999	TAGCGAGCTATTACAACAGTTATAAGAGAAGCTTACGATATTGTAAGTATGTGTTGTTATAAT	63	TCH1516intergenic_61153-61682
0	n219166	3	0	589	3	1441	0	0	No	NA	NA	NA	NA	AAGAAATTGGAATCTTTAATAAAAACTATAATATTTACAGGTAAACGATATCAATATACTT	61	TCH1516intergenic_61153-61682
0	n232574	1328	7	589	1321	1441	0	0	No	0.93151	0.999878	-0.00456902	0.0860999	TCAGGTCTTTCTTAATTTTATATTGATTATAACAACACATACTTACAATATCGTA	55	TCH1516intergenic_61153-61682
0	n234200	1	0	589	1	1441	0	0	No	NA	NA	NA	NA	TTTACTATTATAACAACACATACTTACAATATCGTA	36	TCH1516intergenic_61153-61682
0	n269988	51	51	589	0	1441	0	0	No	NA	NA	NA	NA	TAGCGAGCTATTACAACAGTTATAAGAGAAACTTACAATAATGAAAGTATTCCACTAGACCTTCAAAT	68	USA300HOU_RS00185;DBGWAS_general_tag=hypothetical_protein~~~TCH1516intergenic_61153-61682
0	n271265	1	0	589	1	1441	0	0	No	NA	NA	NA	NA	CTAGACCTTCAAATCTTACTTTGGAACATGATAAAAGATCGAGACAATCAACTTAATACAG	61	USA300HOU_RS00290;DBGWAS_general_tag=hypothetical_protein
0	n281208	38	38	589	0	1441	0	0	No	NA	NA	NA	NA	ATGAAAGAAATTCAAGACGAGGTAAAATAACATGAAAATCAATCGATACATCACAAGAGG	60	USA300HOU_RS00290;DBGWAS_general_tag=hypothetical_protein~~~USA300HOU_RS00185;DBGWAS_general_tag=hypothetical_protein
0	n281308	1608	222	589	1386	1441	0	0	No	0.450792	0.999878	-0.0271916	0.753781	CATGAAAATCAATCGATACATCACAAGAGGAATTAAT	37	USA300HOU_RS00290;DBGWAS_general_tag=hypothetical_protein~~~USA300HOU_RS00185;DBGWAS_general_tag=hypothetical_protein
0	n283238	4	4	589	0	1441	0	0	No	NA	NA	NA	NA	AAAATAGTATGAACATCAATCGATACATCACAAGAGGAATTAAT	44	USA300HOU_RS00185;DBGWAS_general_tag=hypothetical_protein
0	n284213	1612	226	589	1386	1441	0	0	No	0.640902	0.999878	-0.0140457	0.466215	ATCAATCGATACATCACAAGAGGAATTAATGAAAGTATTCCACTAGACCTTCAAAT	56	USA300HOU_RS00185;DBGWAS_general_tag=hypothetical_protein
0	n286334	1608	222	589	1386	1441	0	0	No	0.450792	0.999878	-0.0271916	0.753781	AAGGGAGGGAAATAGCATGAAAATCAATCGATACATCACAAGAGG	45	USA300HOU_RS00290;DBGWAS_general_tag=hypothetical_protein~~~USA300HOU_RS00185;DBGWAS_general_tag=hypothetical_protein
0	n287934	1310	6	589	1304	1441	0	0	No	0.928882	0.999878	-0.00184556	0.0891846	AAAAAATAAATGCCAATCTACCTATAAAAAAACTAACCCAAGTCATAATATGATTAATGAA	61	USA300HOU_RS00260;DBGWAS_general_tag=hypothetical_protein
0	n288096	1328	7	589	1321	1441	0	0	No	0.93151	0.999878	-0.00456902	0.0860999	AAAAAAGCATTCATTAATCATATTATGACTTGGGTTAGT	39	USA300HOU_RS00260;DBGWAS_general_tag=hypothetical_protein
0	n288389	18	1	589	17	1441	0	0	No	NA	NA	NA	NA	AAAAAATAAATGCCAATCTACCTATAAAAAGACTAACCCAAGTCATAATATGATTAATGAA	61	USA300HOU_RS00260;DBGWAS_general_tag=hypothetical_protein
0	n306269	1328	7	589	1321	1441	0	0	No	0.93151	0.999878	-0.00456902	0.0860999	ACCTTTATTTGTATGGATACTTGCTGATGAACCAACATCAGAACATGGCAAAAAA	55	USA300HOU_RS00260;DBGWAS_general_tag=hypothetical_protein
0	n306842	1	1	589	0	1441	0	0	No	NA	NA	NA	NA	GATAATTTTATTATTATTAAAAAAAGTGAATATTTCACTAATTCAAATGAGTATAAAGTTA	61
0	n306843	50	50	589	0	1441	0	0	No	NA	NA	NA	NA	GATAATTTTATTATTATTAAAAAAAGTGAAGATTTCACTAATTCAAATGAGTATAAAGTTA	61
0	n310391	1	0	589	1	1441	0	0	No	NA	NA	NA	NA	TCACTTCGATTGTGGATGATAATATAAATTTTCAGGTCTTTCTTAATTTTATATTGATTAT	61	TCH1516intergenic_61153-61682
0	n311603	1327	7	589	1320	1441	0	0	No	0.452761	0.999878	-0.0308383	0.750855	ATAATCAATATAAAATTAAGAAAGACCTGAGAATTTATATTATCATCCACAATCGAAGTGA	61	TCH1516intergenic_61153-61682
0	n318005	1612	226	589	1386	1441	0	0	No	0.640902	0.999878	-0.0140457	0.466215	TAATGAAAGTATTCCACTAGACCTTCAAATCTTACTTTGG	40	USA300HOU_RS00185;DBGWAS_general_tag=hypothetical_protein
0	n327889	1607	222	589	1385	1441	0	0	No	0.483843	0.999878	-0.0231685	0.699926	CTTCAAATCTTACTTTGGCACATGGTAGAAAAAAA	35	USA300HOU_RS00185;DBGWAS_general_tag=hypothetical_protein
0	n329955	1366	47	589	1319	1441	0	0	No	0.858657	0.999878	0.00387965	-0.177984	TTTTACCATGTTCCAAAGTAAGATTTGAAGGTCTAG	36	USA300HOU_RS00290;DBGWAS_general_tag=hypothetical_protein
0	n329956	1608	223	589	1385	1441	0	0	No	0.522451	0.999878	-0.0201265	0.639415	TTCTACCATGTGCCAAAGTAAGATTTGAAGGTCTAGTGGAAT	42	USA300HOU_RS00185;DBGWAS_general_tag=hypothetical_protein
0	n330094	1	0	589	1	1441	0	0	No	NA	NA	NA	NA	TCCACTAGACCTTCAAATCTTACTTTGGAACATG	34	USA300HOU_RS00290;DBGWAS_general_tag=hypothetical_protein~~~USA300HOU_RS00185;DBGWAS_general_tag=hypothetical_protein
0	n330095	3	3	589	0	1441	0	0	No	NA	NA	NA	NA	TCCACTAGACCTTCAAATCTTACTTTGGAATATG	34	USA300HOU_RS00185;DBGWAS_general_tag=hypothetical_protein
0	n330774	4	3	589	1	1441	0	0	No	NA	NA	NA	NA	ATTCCACTAGACCTTCAAATCTTACTTTGGAA	32	USA300HOU_RS00185;DBGWAS_general_tag=hypothetical_protein
0	n331330	15	14	589	1	1441	0	0	No	NA	NA	NA	NA	CCATATTCCAAAGTAAGATTTGAAGGTCTAG	31
0	n347112	1	1	589	0	1441	0	0	No	NA	NA	NA	NA	TGATGTATCGATTGATGTTCATACTATTTTCCTCC	35
0	n377299	1327	7	589	1320	1441	0	0	No	0.325513	0.999878	-0.0424432	0.983245	TCAAGATATATAATATTAAAGCAATTAAAAAGAAT	35	USA300HOU_RS00260;DBGWAS_general_tag=hypothetical_protein
0	n378001	1378	58	589	1320	1441	0	0	Yes	0.000137552	0.00813504	-0.103003	3.86296	ATATATAATATTAAAGCAATTAAAAAGAATA	31	USA300HOU_RS00260;DBGWAS_general_tag=hypothetical_protein
0	n389978	1379	58	589	1321	1441	0	0	Yes	0.000527085	0.028252	-0.100336	3.5174	TATTATAAAAACATTAATAGCGAGCTATTACAACAGTTATAAGAGAA	47	TCH1516intergenic_61153-61682
1	n150	6	6	589	0	1441	0	0	No	NA	NA	NA	NA	CCCAGCCTATTCTTTTCATAAAAAAAAGGGGCTGACCCAAAAGTAGCTCCT	51
1	n531	40	14	589	26	1441	0	0	No	NA	NA	NA	NA	AAAAAATAAATTCTAAAATTTTACAAATAAAA	32
1	n949	7	7	589	0	1441	0	0	No	NA	NA	NA	NA	AAAAAAGGGGCTGACCCAAAAGTAGCTCCTA	31
1	n1333	1	0	589	1	1441	0	0	No	NA	NA	NA	NA	TTCATAATTTGAAATGCTATATTATAAAAATACTAATGGGTTTTATGCATCTCGTAGGTTTGTAGAA	67	TCH1516intergenic_1179209-1179516~~~NCTC8325intergenic_1085307-1085614
1	n2151	9	9	589	0	1441	0	0	No	NA	NA	NA	NA	AAAAAGGGGCTGACCCAAAAGTAGCTCCTAT	31
1	n2697	1	1	589	0	1441	0	0	No	NA	NA	NA	NA	AAAATAAATTCTAAAATTTTACAAATAAAAGGGAGTGGGACAGAAATAATATTT	54
1	n4316	16	16	589	0	1441	0	0	No	NA	NA	NA	NA	AAAAGGGGCTGACCCAAAAGTAGCTCCTATA	31
1	n6672	1	0	589	1	1441	0	0	No	NA	NA	NA	NA	GTCCCGGACTCTTTTTTATTATTAAGTAAATTATAAAAGACAATTTCTTAATTAATATATGATATACCTATATCTAATAATTTATT	86
1	n8704	2	2	589	0	1441	0	0	No	NA	NA	NA	NA	TTCCTTACATTACTTTACCTAAAACAAAAAGGGGCTGACCCAAAAGTAGCTCCTA	55	TCH1516intergenic_1107365-1107532~~~NCTC8325intergenic_1013293-1013460
1	n12813	1	1	589	0	1441	0	0	No	NA	NA	NA	NA	ATAAGTAATTGAAAGATAAAACATAAAAAAGGGGCTGACCCAAAAGTAGCTCCT	54	TCH1516intergenic_2165192-2165509~~~NCTC8325intergenic_2111488-2111805
1	n15744	1	1	589	0	1441	0	0	No	NA	NA	NA	NA	TAATTTTTATTTACATTTTTAACTTATAAATCAAAACCACCCGTGTGAACGGGT	54	TCH1516intergenic_2825185-2826032~~~NCTC8325intergenic_2773601-2774449~~~TCH1516intergenic_1917784-1917919~~~NCTC8325intergenic_1820726-1820861
1	n15832	1	1	589	0	1441	0	0	No	NA	NA	NA	NA	TTATATCTTTTATACATGTACATTATCACCGATAAAGTCCGTATAATTGTGTAAA	55	TCH1516intergenic_1804712-1805352~~~NCTC8325intergenic_1705641-1707965
1	n17226	6	6	589	0	1441	0	0	No	NA	NA	NA	NA	AATATTATTTCTGTCCCACTCCCTTTTATGCATGCGCTAAAGCGCAGGCGAA	52	TCH1516intergenic_2504696-2505099~~~NCTC8325intergenic_2451645-2452048
1	n17267	1	0	589	1	1441	0	0	No	NA	NA	NA	NA	ATCCAAGAACTTTATGTCCCGGACTCTCTTTTTTTTGAAAATTTAACTTCAAAA	54
1	n17912	10	10	589	0	1441	0	0	No	NA	NA	NA	NA	ATCTTACTGCTGTTTTTTTTAGGGATTAATATCCCAGACTCTTTAGTTTATTTATTTTCAA	61	TCH1516intergenic_2478113-2478687~~~NCTC8325intergenic_2425060-2426130
1	n17913	1822	530	589	1292	1441	0	0	No	0.034538	0.999878	0.0175402	-2.11547	TACTGCTGTTTTTTTTAGGGATTAATGTCCCAG	33
1	n17914	6	4	589	2	1441	0	0	No	NA	NA	NA	NA	TTATCTTACTGCTGTTTTTTTTTAGGGATTAATGTCCCAGACTCT	45
1	n21283	1	0	589	1	1441	0	0	No	NA	NA	NA	NA	TGTGGGTAATTTATATAATTTTTATTTACACTTTTAACTTATAAAAAAAGCGCCTATGTCA	61	TCH1516intergenic_2825185-2826032~~~NCTC8325intergenic_2773601-2774449
1	n21287	1506	96	589	1410	1441	0	0	Yes	1.06104e-07	8.90542e-06	0.0782452	-5.35617	TTTTATTTACATTTTTAACTTATAAAAAAAGCGCCTATG	39
1	n21916	1	1	589	0	1441	0	0	No	NA	NA	NA	NA	ACATGTAAAACTACAATATTTTATTGAGCTGTTTAATTTGATTTTAAGGAAAACCTTTTAT	61	TCH1516intergenic_756512-756724~~~NCTC8325intergenic_675684-675902
1	n25109	3	3	589	0	1441	0	0	No	NA	NA	NA	NA	TAAAAAGGGGCTGACCCAAAAGTAGCTCCTA	31
1	n25508	94	45	589	49	1441	0	0	No	NA	NA	NA	NA	TCTCTTTTTTTTGAAAATTTAACTTCAAAAA	31
1	n26859	2015	584	589	1431	1441	0	0	No	NA	NA	NA	NA	AAAGTAAAAATAACTAATAACATTTAGAGGCTGGGA	36
1	n28046	1991	561	589	1430	1441	0	0	No	NA	NA	NA	NA	AAAATAACTAATAACATTTAGAGGCTGGGACATAAATCCC	40	TCH1516intergenic_2071731-2072077~~~NCTC8325intergenic_2018124-2018696
1	n30701	1	1	589	0	1441	0	0	No	NA	NA	NA	NA	ACCTAATATAAATATAATTACTGATAATATGATAAAGTCCGTATAATTGTGTAAA	55	USA300HOU_RS13620;DBGWAS_general_tag=MFS_transporter~~~SAOUHSC_02818;DBGWAS_general_tag=hypothetical_protein
1	n33630	1974	545	589	1429	1441	0	0	No	NA	NA	NA	NA	ATAACATTTAGAGGCTGGGACATAAATCCCTAAAAAA	37	TCH1516intergenic_2071731-2072077~~~NCTC8325intergenic_2018124-2018696~~~TCH1516intergenic_318637-318882~~~NCTC8325intergenic_264152-264824
1	n33631	1	1	589	0	1441	0	0	No	NA	NA	NA	NA	ATAACATTTAGAGGCTGGGACATAAATCCCGAAAAAACAGCAGTAAGATAATTTTCAATTA	61	TCH1516intergenic_1804712-1805352~~~NCTC8325intergenic_1705641-1707965~~~TCH1516intergenic_2478113-2478687~~~TCH1516intergenic_2071731-2072077~~~NCTC8325intergenic_2018124-2018696~~~TCH1516intergenic_318637-318882~~~NCTC8325intergenic_264152-264824~~~TCH1516intergenic_2317347-2317802~~~TCH1516intergenic_1893139-1893485~~~NCTC8325intergenic_2263981-2266096~~~NCTC8325intergenic_1794848-1796426~~~TC…
1	n33964	1	1	589	0	1441	0	0	No	NA	NA	NA	NA	TTTTTTCAATTCTAGTCAACCTTGCCGGAGTGGGACGACGAAATAAATTTTGCTAAAAT	59	USA300HOU_RS15360;DBGWAS_general_tag=hypothetical_protein~~~NCTC8325intergenic_1776134-1776997~~~USA300HOU_RS15240;DBGWAS_general_tag=hypothetical_protein~~~NCTC8325intergenic_977455-978260~~~USA300HOU_RS15110;DBGWAS_general_tag=hypothetical_protein~~~NCTC8325intergenic_720044-720394~~~NCTC8325intergenic_603627-604015
1	n33973	1	1	589	0	1441	0	0	No	NA	NA	NA	NA	TTCAATTCTAGTCAACCTTGCCGGCGGGGGACGACGAAATAAATTTTACGAAAATAT	57	USA300HOU_RS15240;DBGWAS_general_tag=hypothetical_protein~~~NCTC8325intergenic_977455-978260~~~USA300HOU_RS15110;DBGWAS_general_tag=hypothetical_protein~~~NCTC8325intergenic_720044-720394~~~NCTC8325intergenic_603627-604015
1	n36927	1	0	589	1	1441	0	0	No	NA	NA	NA	NA	TTTAGCAAAGGTAATAATGATATTAATAATATACAAAAAATATAAATCAAATCGACATCCT	61	USA300HOU_RS00785;DBGWAS_general_tag=hypothetical_protein~~~SAOUHSC_00111;DBGWAS_general_tag=hypothetical_protein
1	n36928	2010	570	589	1440	1441	0	0	No	NA	NA	NA	NA	CAAAGGTAATAATGATATTAATAATGTACAAAAAATATAAAT	42	USA300HOU_RS00785;DBGWAS_general_tag=hypothetical_protein~~~SAOUHSC_00111;DBGWAS_general_tag=hypothetical_protein
1	n37891	1	1	589	0	1441	0	0	No	NA	NA	NA	NA	TTAAGCTTTATTTGAAAAACGAAAAATGTCGATAAAGTCCGTATAATTGTGTAAAAGT	58	TCH1516intergenic_1056181-1056376~~~NCTC8325intergenic_962108-962303
1	n37960	2028	587	589	1441	1441	0	0	No	NA	NA	NA	NA	ACCAACACAAGTACCTAATATAAATATAATTACTGATAATAT	42	USA300HOU_RS13620;DBGWAS_general_tag=MFS_transporter~~~SAOUHSC_02818;DBGWAS_general_tag=hypothetical_protein
1	n39986	2026	586	589	1440	1441	0	0	No	NA	NA	NA	NA	ACCTAATATAAATATAATTACTGATAATATA	31	USA300HOU_RS13620;DBGWAS_general_tag=MFS_transporter~~~SAOUHSC_02818;DBGWAS_general_tag=hypothetical_protein
1	n42409	1	0	589	1	1441	0	0	No	NA	NA	NA	NA	AAAATATTGTAGTTTTACATGTAAAAGAAAGTGAATATATACATCTTTAGTCTAGTATTAT	61	TCH1516intergenic_756512-756724~~~NCTC8325intergenic_675684-675902
1	n47030	5	0	589	5	1441	0	0	No	NA	NA	NA	NA	TTTACTTAATAATAAAAAAGAGTCCGGGACATAAAGTTCTTGGA	44
1	n47754	9	4	589	5	1441	0	0	No	NA	NA	NA	NA	AAAAAGAGTCCGGGACATAAAGTTCTTGGAT	31
1	n49362	18	13	589	5	1441	0	0	No	NA	NA	NA	NA	AAAAGAGTCCGGGACATAAAGTTCTTGGATA	31
1	n52084	3	3	589	0	1441	0	0	No	NA	NA	NA	NA	TGAAATGTTTATAATAATATTGAAAGATATGATAAAGTCCGTATAATTGTGTAAA	55
1	n52335	19	19	589	0	1441	0	0	No	NA	NA	NA	NA	CTTTGCTAAATATTATAAAAAGATATAAGAGAGTCCGGGACATAAAGTTCTTGG	54	SAOUHSC_00111;DBGWAS_general_tag=hypothetical_protein
1	n52440	27	19	589	8	1441	0	0	No	NA	NA	NA	NA	AAAGAGTCCGGGACATAAAGTTCTTGGATAA	31	USA300HOU_RS00175;DBGWAS_general_tag=IS5/IS1182_family_transposase
1	n54091	1	1	589	0	1441	0	0	No	NA	NA	NA	NA	TTATCCAAGAACTTTATGTCCCGGACTCTCCTTAACTATACGATAAACAGTAGAGCGA	58	USA300HOU_RS00175;DBGWAS_general_tag=IS5/IS1182_family_transposase
1	n54092	1	1	589	0	1441	0	0	No	NA	NA	NA	NA	CCAAGAACTTTATGTCCCGGACTCTCTTATGCATGCGCTTAGCGCAGGCGC	51	TCH1516intergenic_2265137-2265636
1	n54097	2	2	589	0	1441	0	0	No	NA	NA	NA	NA	AACTTTATGTCCCGGACTCTTTTATGCATGCGCTAAAGCGCAGGCGAA	48	TCH1516intergenic_2504696-2505099~~~NCTC8325intergenic_2451645-2452048
1	n54100	1	0	589	1	1441	0	0	No	NA	NA	NA	NA	CCAAGAACTTTATGTCCCGGACTCTTTTTATTATTAAGTAAAATTATAAAAGAC	54
1	n54101	2	2	589	0	1441	0	0	No	NA	NA	NA	NA	TCCAAGAACTTTATGTCCCGGACTCTTTTTCTTATATCTTTTTATAATATTT	52	SAOUHSC_00111;DBGWAS_general_tag=hypothetical_protein
1	n54195	1	0	589	1	1441	0	0	No	NA	NA	NA	NA	ATTTCTGTCCCACTCCCTAATAACTGAGTTATAATAAAGTCTTTTAACCCACATTAAATAT	61	NCTC8325intergenic_977455-978260~~~TCH1516intergenic_1071528-1072182
1	n57062	10	10	589	0	1441	0	0	No	NA	NA	NA	NA	ATCCAAGAACTTTATGTCCCGGACTCTTTTATGCATG	37
1	n57255	21	20	589	1	1441	0	0	No	NA	NA	NA	NA	AAGAGAGTCCGGGACATAAAGTTCTTGGATAA	32	USA300HOU_RS00175;DBGWAS_general_tag=IS5/IS1182_family_transposase
1	n59908	70	62	589	8	1441	0	0	No	NA	NA	NA	NA	ACTTATCCAAGAACTTTATGTCCCGGACTCT	31	USA300HOU_RS00175;DBGWAS_general_tag=IS5/IS1182_family_transposase
1	n60744	20	20	589	0	1441	0	0	No	NA	NA	NA	NA	ATAAGAGAGTCCGGGACATAAAGTTCTTGGAT	32
1	n61591	2005	575	589	1430	1441	0	0	No	NA	NA	NA	NA	AAAATATCATTTCTGTCCCACTCCCTAATAACTGAGTT	38	NCTC8325intergenic_977455-978260~~~TCH1516intergenic_1071528-1072182~~~NCTC8325intergenic_2815019-2815472
1	n61593	1	1	589	0	1441	0	0	No	NA	NA	NA	NA	AATAAATTTTACGAAAATATCATTTCTGTCTCACTCCCTAATAACTGAGTTTTAATGAAGT	61	NCTC8325intergenic_977455-978260
1	n63687	2	2	589	0	1441	0	0	No	NA	NA	NA	NA	CCAAGAACTTTATGTCCCGGACTCTTTTTAA	31
1	n63896	1	1	589	0	1441	0	0	No	NA	NA	NA	NA	CTTCATTAAAACTCAGTTATTAGGGAGTGGACAGAAATGATATTTTCGTAAAATTTAT	58	NCTC8325intergenic_977455-978260
1	n63928	22	21	589	1	1441	0	0	No	NA	NA	NA	NA	CTTATCCAAGAACTTTATGTCCCGGACTCTC	31	USA300HOU_RS00175;DBGWAS_general_tag=IS5/IS1182_family_transposase
1	n64160	3	2	589	1	1441	0	0	No	NA	NA	NA	NA	TAAAAAGAGTCCGGGACATAAAGTTCTTGGA	31
1	n64574	528	528	589	0	1441	0	0	Yes	0.000491621	0.0265031	-0.0595181	-3.61991	TCCCAGCCTATTCTTTTCATAAAAAAAAGACGGATTAATTATCCGTCTTTT	51
1	n64657	538	538	589	0	1441	0	0	Yes	8.46806e-07	6.28003e-05	-0.097507	-5.19744	AAAAAAAGACGGATTAATTATCCGTCTTTTTCTTATATC	39
1	n65545	1	1	589	0	1441	0	0	No	NA	NA	NA	NA	GATATAAGAAAAAGACGGATAATTAATCCGATAAAGTCCGTATAATTGTGTAAAAGT	57
1	n65552	538	538	589	0	1441	0	0	Yes	1.43387e-06	0.000102802	-0.0957549	-5.07516	TAAATATTATAAAAAGATATAAGAAAAAGACGGATAATTAA	41	SAOUHSC_00111;DBGWAS_general_tag=hypothetical_protein
1	n66388	1	1	589	0	1441	0	0	No	NA	NA	NA	NA	ATTTTACGAAAATATCATTTCTGTCCCACTTCCTAATAACTGAGTTTTAATGAAGTCTTTT	61	NCTC8325intergenic_977455-978260
1	n66434	1	1	589	0	1441	0	0	No	NA	NA	NA	NA	TCAAATTAAATAGCTCAATAAAATATTGTATTTTTACATGTAAAAGAAAATGAATATATAC	61	TCH1516intergenic_756512-756724~~~NCTC8325intergenic_675684-675902
1	n67189	10	10	589	0	1441	0	0	No	NA	NA	NA	NA	AAAAGACGGATAATTAATCCGTCTTTTTTTATGAAAAGAATAGGCTGGGAAAT	53
1	n67203	539	539	589	0	1441	0	0	Yes	2.41228e-07	1.92659e-05	-0.105365	-5.46351	AAAAGATATAAGAAAAAGACGGATAATTAATCCG	34	SAOUHSC_00111;DBGWAS_general_tag=hypothetical_protein
1	n70324	2028	587	589	1441	1441	0	0	No	NA	NA	NA	NA	CAGCAAAGCTGGCACAATACCAACACAAGTACCTAATATAAATATAAT	48	USA300HOU_RS13620;DBGWAS_general_tag=MFS_transporter~~~SAOUHSC_02818;DBGWAS_general_tag=hypothetical_protein
1	n73548	1	1	589	0	1441	0	0	No	NA	NA	NA	NA	TTAATTATCCGTCTTTTTCTTATATCTTTTATAATATTTAGCAAAGGTAATAATGA	56	USA300HOU_RS00785;DBGWAS_general_tag=hypothetical_protein~~~SAOUHSC_00111;DBGWAS_general_tag=hypothetical_protein
1	n77320	1	1	589	0	1441	0	0	No	NA	NA	NA	NA	GTAACGTATTCTCTTTCAACTCGCTACTTCACATACGCACTACGAATGACTAAAAGTTCAT	61	TCH1516intergenic_2672042-2672421~~~NCTC8325intergenic_2620534-2620913
1	n81681	1	1	589	0	1441	0	0	No	NA	NA	NA	NA	ACTTTTACACAATTATACGGACTTTATCGCGAATTTGGTATTAAAAGCTTTCGTTCAA	58	TCH1516intergenic_163504-163717~~~NCTC8325intergenic_108894-109107
1	n86880	2	0	589	2	1441	0	0	No	NA	NA	NA	NA	CTGGGACATTAATCGATCAAATGCTCCCTTAAAAGTAGACATTGAATAAATGAAGGCTTTG	61	NCTC8325intergenic_977455-978260~~~TCH1516intergenic_1071528-1072182
1	n86882	2015	576	589	1439	1441	0	0	No	NA	NA	NA	NA	GACATTAATCGATCAAATGCTCCCTTCAAAGTAGACATTGAATAA	45	NCTC8325intergenic_977455-978260~~~TCH1516intergenic_1071528-1072182~~~TCH1516intergenic_598451-598732~~~NCTC8325intergenic_534514-534795
1	n88492	2030	589	589	1441	1441	0	0	No	NA	NA	NA	NA	CCCACATCTTTTTAAAAGGTGTGGGCTTTATTATCATTAACCCAACTCACAGTGACGGGTTACGCAAGGTATTGAATTACC	81	TCH1516intergenic_2825185-2826032~~~NCTC8325intergenic_2773601-2774449
1	n91119	2016	577	589	1439	1441	0	0	No	NA	NA	NA	NA	AATGCTCCCTTCAAAGTAGACATTGAATAAATGA	34	NCTC8325intergenic_977455-978260~~~TCH1516intergenic_1071528-1072182
1	n91191	2	2	589	0	1441	0	0	No	NA	NA	NA	NA	TTATTCAATGTCTACTTTGAAGGGAGCATTAGATCGATTAATGTCCCAGATTTTTCTTGTT	61	NCTC8325intergenic_977455-978260~~~TCH1516intergenic_1071528-1072182
1	n92106	2021	580	589	1441	1441	0	0	No	NA	NA	NA	NA	AAGGGAGCATTTGATCGATTAATGTCCCAGATTTTTCT	38	NCTC8325intergenic_977455-978260~~~TCH1516intergenic_1071528-1072182
1	n93630	3	3	589	0	1441	0	0	No	NA	NA	NA	NA	CTATAACTAGCATGTCTTTAAATGAATATGATAAAGTCCGTATAATTGTGTAAA	54	TCH1516intergenic_756512-756724~~~NCTC8325intergenic_675684-675902
1	n95698	1	1	589	0	1441	0	0	No	NA	NA	NA	NA	ATGTACAAAAAATATAAATCAAATCGACATACTTATAAAACATCAGAACCACTAAAAACAA	61	USA300HOU_RS00785;DBGWAS_general_tag=hypothetical_protein~~~SAOUHSC_00111;DBGWAS_general_tag=hypothetical_protein
1	n96939	3	0	589	3	1441	0	0	No	NA	NA	NA	NA	TTGATAAGCGCCTATGTGATGGTAAATCATAACATAGGCGCTTTTTTTATAAGTTAAAAAT	61	TCH1516intergenic_2825185-2826032~~~NCTC8325intergenic_2773601-2774449
1	n97145	52	52	589	0	1441	0	0	No	NA	NA	NA	NA	GCTCTTTACAACACCGAGCGTGCCCGTACTAGGTAATTCAATACCTTGCGTAACCCGTCAC	61	TCH1516intergenic_2825185-2826032~~~NCTC8325intergenic_2773601-2774449
1	n97837	2019	580	589	1439	1441	0	0	No	NA	NA	NA	NA	CTGGGACATTAATCGATCAAATGCTCCCTTC	31	NCTC8325intergenic_977455-978260~~~TCH1516intergenic_1071528-1072182
1	n97944	1978	537	589	1441	1441	0	0	No	NA	NA	NA	NA	CCGTACTCGGTAATTCAATACCTTGCGTAACCCGTCAC	38	TCH1516intergenic_2825185-2826032~~~NCTC8325intergenic_2773601-2774449
1	n99234	1	0	589	1	1441	0	0	No	NA	NA	NA	NA	TTGCTAAATATTATAAAAAGAATAGGCTGGTAAATAAATCAATCTTCTATGATCTACGAAG	61	USA300HOU_RS00785;DBGWAS_general_tag=hypothetical_protein
1	n99235	1448	8	589	1440	1441	0	0	Yes	1.30488e-113	9.3794e-111	0.969956	-111.991	AAAAAGAATAGGCTGGGAAATAAATCAATCT	31	USA300HOU_RS00785;DBGWAS_general_tag=hypothetical_protein~~~NCTC8325intergenic_115214-116537
1	n99268	1	1	589	0	1441	0	0	No	NA	NA	NA	NA	TAAATATTATAAAAAGATATAAGAAAAAGAATAGGCTGGGAAATAAATCAATC	53	USA300HOU_RS00785;DBGWAS_general_tag=hypothetical_protein~~~SAOUHSC_00111;DBGWAS_general_tag=hypothetical_protein~~~NCTC8325intergenic_115214-116537
1	n100552	1630	190	589	1440	1441	0	0	No	0.548022	0.999878	-0.0166596	0.600439	AAAAGAATAGGCTGGGAAATAAATCAATCTTCTATGATCTACGAA	45	USA300HOU_RS00785;DBGWAS_general_tag=hypothetical_protein~~~NCTC8325intergenic_115214-116537
1	n102040	1447	7	589	1440	1441	0	0	Yes	6.24766e-165	1.59263e-161	0.98847	-198.457	TTGCTAAATATTATAAAAAGAATAGGCTGGGAAATAAATCAATC	44	USA300HOU_RS00785;DBGWAS_general_tag=hypothetical_protein~~~NCTC8325intergenic_115214-116537
1	n102042	2018	582	589	1436	1441	0	0	No	NA	NA	NA	NA	CTTTTAACCCACATTAAATATTATTTTGCAATTGCAATGAATAACAAGAAAA	52	NCTC8325intergenic_977455-978260~~~TCH1516intergenic_1071528-1072182
1	n105688	1	1	589	0	1441	0	0	No	NA	NA	NA	NA	AGAATAAGTTGTCATCTAATTACAGGAAATTCGCATAAATTAGATGAAATGGAAAGTAATA	61	TCH1516intergenic_2825185-2826032~~~NCTC8325intergenic_2773601-2774449
1	n106657	1	1	589	0	1441	0	0	No	NA	NA	NA	NA	TTTTCGTTCAGTCAATTACTGCCAATATAAATTCGTAGATCATAGAAGATTGATTTATTTC	61	USA300HOU_RS00785;DBGWAS_general_tag=hypothetical_protein~~~NCTC8325intergenic_115214-116537
1	n107815	1	0	589	1	1441	0	0	No	NA	NA	NA	NA	GACTAGAATTGAAAAAAGCTTATTACAAGCACATTTTCGTTCAGTCAATTACTGCCAATAT	61	NCTC8325intergenic_115214-116537
1	n107884	1	0	589	1	1441	0	0	No	NA	NA	NA	NA	GACTAGAATTGAAAAAAGCTTATTACAAGCTCATTTTCGTTCAGTCAATTACTGCCAATAT	61	NCTC8325intergenic_115214-116537
1	n107929	2001	564	589	1437	1441	0	0	No	NA	NA	NA	NA	TACAAGCGCATTTTCGTTCAGTCAATTACTGCCAATAT	38	NCTC8325intergenic_115214-116537
1	n108087	2002	563	589	1439	1441	0	0	No	NA	NA	NA	NA	TCTACGAAGTTATATTGGCAGTAATTGACTGAACGAAAA	39	USA300HOU_RS00785;DBGWAS_general_tag=hypothetical_protein~~~NCTC8325intergenic_115214-116537
1	n108935	382	382	589	0	1441	0	0	No	0.0673298	0.999878	0.03484	1.8295	CATAGAACATTGATTTATTTCCCAGCCTATTCTTTTCA	38	USA300HOU_RS00785;DBGWAS_general_tag=hypothetical_protein~~~NCTC8325intergenic_115214-116537
1	n108936	1	1	589	0	1441	0	0	No	NA	NA	NA	NA	AGCATAGAACATTGATTTATGTCCCAGCCTATTCTTTTCATAAAAAAAAGA	51	TCH1516intergenic_2580365-2580589~~~TCH1516intergenic_1470017-1470297~~~TCH1516intergenic_891806-892323~~~NCTC8325intergenic_2527319-2527926~~~NCTC8325intergenic_1375286-1375630~~~NCTC8325intergenic_811453-811871
1	n109882	18	18	589	0	1441	0	0	No	NA	NA	NA	NA	AATATTATTTCTGTCCCACTCCCTTTTATGAAAAGAATAGGCTGGGAAATAAA	53	NCTC8325intergenic_115214-116537
1	n112120	564	564	589	0	1441	0	0	Yes	2.19002e-07	1.75408e-05	-0.114616	-5.63581	ATTGATTTATTTCCCAGCCTATTCTTTTCATAAAA	35	USA300HOU_RS00785;DBGWAS_general_tag=hypothetical_protein~~~NCTC8325intergenic_115214-116537
1	n112161	536	536	589	0	1441	0	0	Yes	0.000661019	0.0348315	-0.0603648	-3.57334	ATTTCCCAGCCTATTCTTTTCATAAAAAAAAG	32
1	n112212	2003	564	589	1439	1441	0	0	No	NA	NA	NA	NA	CATTTTCGTTCAGTCAATTACTGCCAATATAA	32	NCTC8325intergenic_115214-116537
1	n112841	182	182	589	0	1441	0	0	No	NA	NA	NA	NA	AGATTGATTTATTTCCCAGCCTATTCTTTTCA	32	USA300HOU_RS00785;DBGWAS_general_tag=hypothetical_protein~~~NCTC8325intergenic_115214-116537
1	n113492	1	1	589	0	1441	0	0	No	NA	NA	NA	NA	TCCCAGCCTATTCTTTTCATAAAAAAAAGAGGCTGGGACATTAAGTTCTTAGGC	54
1	n113493	2	2	589	0	1441	0	0	No	NA	NA	NA	NA	CCCAGCCTATTCTTTTCATAAAAAAAAGGGAGTGGGACAGAAATAATATTTT	52
1	n113518	8	8	589	0	1441	0	0	No	NA	NA	NA	NA	CCCTTTTTTTTATGAAAAGAATAGGCTGGGAA	32
1	n114024	546	546	589	0	1441	0	0	Yes	5.73686e-07	4.3583e-05	-0.105767	-5.38791	TTTATTTCCCAGCCTATTCTTTTCATAAAAAAA	33
1	n114110	528	528	589	0	1441	0	0	Yes	0.000863129	0.0440731	-0.0560198	-3.46185	TCTTTTTTTTATGAAAAGAATAGGCTGGGAA	31
1	n115103	2029	588	589	1441	1441	0	0	No	NA	NA	NA	NA	TGTAAATAAAAATTATATAAATTACCCACATCTTTTTAAAAGGTGTGGGCTTTA	54	TCH1516intergenic_2825185-2826032~~~NCTC8325intergenic_2773601-2774449
1	n118159	8	8	589	0	1441	0	0	No	NA	NA	NA	NA	AAATTAACTCAGGCTGGGACATAAATCAATGTTCTATG	38	TCH1516intergenic_2580365-2580589~~~TCH1516intergenic_1470017-1470297~~~TCH1516intergenic_891806-892323~~~NCTC8325intergenic_2527319-2527926~~~NCTC8325intergenic_1375286-1375630~~~NCTC8325intergenic_811453-811871~~~TCH1516intergenic_1380186-1380547~~~NCTC8325intergenic_1286269-1287160
1	n122491	2028	588	589	1440	1441	0	0	No	NA	NA	NA	NA	TTAAAAATGTAAATAAAAATTATATAAATTACCCACA	37	TCH1516intergenic_2825185-2826032~~~NCTC8325intergenic_2773601-2774449
1	n129199	2011	570	589	1441	1441	0	0	No	NA	NA	NA	NA	TACAAAAAATATAAATCAAATCGACATCCTTATAAAACATCAGAACCACTA	51	USA300HOU_RS00785;DBGWAS_general_tag=hypothetical_protein~~~SAOUHSC_00111;DBGWAS_general_tag=hypothetical_protein
1	n129893	1	1	589	0	1441	0	0	No	NA	NA	NA	NA	CAATTAAATATCAACAGGAATAACGAATAAATAAAAAGAGGTTGGGACATAAATCCCTAAAAA	63	TCH1516intergenic_>1443364-1443779~~~NCTC8325intergenic_1348844-1349855
1	n130149	1905	542	589	1363	1441	0	0	No	NA	NA	NA	NA	ATGAAAACAGGCTGGGACATAAATCAATGTTCTATGC	37	TCH1516intergenic_2580365-2580589~~~TCH1516intergenic_1470017-1470297~~~TCH1516intergenic_891806-892323~~~NCTC8325intergenic_2527319-2527926~~~NCTC8325intergenic_1375286-1375630~~~NCTC8325intergenic_811453-811871
1	n130822	7	0	589	7	1441	0	0	No	NA	NA	NA	NA	TTATTTTTAAAATTAGTAATAGTTAAAAAGGGAGTGGGACAGAAATAATATTT	53
1	n131255	1932	547	589	1385	1441	0	0	No	NA	NA	NA	NA	AAAAGAGGTTGGGACATAAATCCCTAAAAAA	31	TCH1516intergenic_>1443364-1443779~~~NCTC8325intergenic_1348844-1349855
1	n132300	379	379	589	0	1441	0	0	No	0.0847316	0.999878	0.0301522	1.72484	ATAGGCTGGGAAATAAATCAATGTTCTATGATCTACGAAGTTATATTGGCAGT	53	USA300HOU_RS00785;DBGWAS_general_tag=hypothetical_protein~~~NCTC8325intergenic_115214-116537
1	n132301	1	1	589	0	1441	0	0	No	NA	NA	NA	NA	TGGGAAATAAATCAATGTTCTATGCTCTACAAAGTT	36	USA300HOU_RS15240;DBGWAS_general_tag=hypothetical_protein~~~NCTC8325intergenic_977455-978260~~~USA300HOU_RS15110;DBGWAS_general_tag=hypothetical_protein~~~NCTC8325intergenic_603627-604015
1	n132302	3	3	589	0	1441	0	0	No	NA	NA	NA	NA	TGGGAAATAAATCAATGTTCTATGCTCTACGAAGTT	36	NCTC8325intergenic_2815019-2815472~~~TCH1516intergenic_2580365-2580589~~~TCH1516intergenic_891806-892323~~~NCTC8325intergenic_2527319-2527926~~~NCTC8325intergenic_811453-811871~~~TCH1516intergenic_2031793-2032023~~~NCTC8325intergenic_1978212-1978642~~~USA300HOU_RS15635;DBGWAS_general_tag=hypothetical_protein
1	n132368	2029	588	589	1441	1441	0	0	No	NA	NA	NA	NA	CTGGAAATTATAAATAATAGTTTAATATGGAATCAGAATTTGGAAATAAAAAGGGTGATAGATAATCAACAGCAAAATAA	80	TCH1516intergenic_2551420-2551507~~~NCTC8325intergenic_2498373-2498460
1	n132803	1630	189	589	1441	1441	0	0	No	0.614007	0.999878	-0.0142794	0.504132	AAATAAATCAATCTTCTATGATCTACGAAGTTATATTGGCAGT	43	USA300HOU_RS00785;DBGWAS_general_tag=hypothetical_protein~~~NCTC8325intergenic_115214-116537
1	n132818	2029	588	589	1441	1441	0	0	No	NA	NA	NA	NA	ATAAATCAATGTTCTATGCTCTACAAAGTTATA	33	USA300HOU_RS15240;DBGWAS_general_tag=hypothetical_protein~~~NCTC8325intergenic_977455-978260~~~USA300HOU_RS15110;DBGWAS_general_tag=hypothetical_protein~~~NCTC8325intergenic_603627-604015
1	n132820	2030	589	589	1441	1441	0	0	No	NA	NA	NA	NA	ATAAATCAATGTTCTATGCTCTACGAAGTTATA	33	NCTC8325intergenic_2815019-2815472~~~TCH1516intergenic_2580365-2580589~~~TCH1516intergenic_891806-892323~~~NCTC8325intergenic_2527319-2527926~~~NCTC8325intergenic_811453-811871~~~TCH1516intergenic_2031793-2032023~~~NCTC8325intergenic_1978212-1978642~~~USA300HOU_RS15635;DBGWAS_general_tag=hypothetical_protein
1	n133988	1950	545	589	1405	1441	0	0	No	NA	NA	NA	NA	AAAGAGGTTGGGACATAAATCCCTAAAAAAA	31
1	n133989	3	2	589	1	1441	0	0	No	NA	NA	NA	NA	AAAGAGGTTGGGACATAAATCCCTAAAAAACAGC	34	TCH1516intergenic_1893139-1893485~~~NCTC8325intergenic_1794848-1796426~~~TCH1516intergenic_>1443364-1443779~~~NCTC8325intergenic_1348844-1349855
1	n134778	1	1	589	0	1441	0	0	No	NA	NA	NA	NA	GAGCATAGAACATTGATTTATGTCCCAGCCATGTCTCTTATACACATCT	49	TCH1516intergenic_2580365-2580589~~~TCH1516intergenic_1470017-1470297~~~TCH1516intergenic_891806-892323~~~NCTC8325intergenic_2527319-2527926~~~NCTC8325intergenic_1375286-1375630~~~NCTC8325intergenic_811453-811871
1	n134779	1	1	589	0	1441	0	0	No	NA	NA	NA	NA	GAGCATAGAACATTGATTTATGTCCCAGCCCGAAGATGATTTTTTTAGGAAGTATATTACA	61	TCH1516intergenic_2580365-2580589~~~TCH1516intergenic_1470017-1470297~~~TCH1516intergenic_891806-892323~~~NCTC8325intergenic_2527319-2527926~~~NCTC8325intergenic_1375286-1375630~~~NCTC8325intergenic_811453-811871
1	n135410	2030	589	589	1441	1441	0	0	No	NA	NA	NA	NA	AACTTCGTAGAGCATAGAACATTGATTTATG	31	NCTC8325intergenic_2815019-2815472~~~TCH1516intergenic_2580365-2580589~~~TCH1516intergenic_891806-892323~~~NCTC8325intergenic_2527319-2527926~~~NCTC8325intergenic_811453-811871~~~TCH1516intergenic_2031793-2032023~~~NCTC8325intergenic_1978212-1978642~~~USA300HOU_RS15635;DBGWAS_general_tag=hypothetical_protein
1	n135470	2029	588	589	1441	1441	0	0	No	NA	NA	NA	NA	AACTTTGTAGAGCATAGAACATTGATTTATGTCTCA	36	USA300HOU_RS15240;DBGWAS_general_tag=hypothetical_protein~~~NCTC8325intergenic_977455-978260~~~USA300HOU_RS15110;DBGWAS_general_tag=hypothetical_protein~~~NCTC8325intergenic_603627-604015
1	n136453	2027	587	589	1440	1441	0	0	No	NA	NA	NA	NA	AATCAATGTTCTATGCTCTACAAAGTTATAATGG	34	USA300HOU_RS15240;DBGWAS_general_tag=hypothetical_protein~~~NCTC8325intergenic_977455-978260~~~USA300HOU_RS15110;DBGWAS_general_tag=hypothetical_protein~~~NCTC8325intergenic_603627-604015
1	n136454	5	3	589	2	1441	0	0	No	NA	NA	NA	NA	AATCAATGTTCTATGCTCTACAAAGTTATATTGGCAGTAGT	41	USA300HOU_RS15240;DBGWAS_general_tag=hypothetical_protein~~~NCTC8325intergenic_977455-978260~~~USA300HOU_RS15110;DBGWAS_general_tag=hypothetical_protein~~~NCTC8325intergenic_720044-720394~~~NCTC8325intergenic_603627-604015~~~TCH1516intergenic_1098194-1098369~~~TCH1516intergenic_800992-801216~~~NCTC8325intergenic_1004122-1004297~~~TCH1516intergenic_2664765-2665202~~~NCTC8325intergenic_2613257-2613…
1	n136455	1	0	589	1	1441	0	0	No	NA	NA	NA	NA	AATCAATGTTCTATGCTCTACAAAGTTATAGTGGCAGTAGTTGACTGAACGAAAATTCGCT	61	USA300HOU_RS15240;DBGWAS_general_tag=hypothetical_protein~~~NCTC8325intergenic_977455-978260~~~USA300HOU_RS15110;DBGWAS_general_tag=hypothetical_protein~~~NCTC8325intergenic_603627-604015
1	n136456	1	0	589	1	1441	0	0	No	NA	NA	NA	NA	AATCAATGTTCTATGCTCTACGAAGTTATAATGGCAGTAGTT	42	NCTC8325intergenic_2815019-2815472~~~TCH1516intergenic_2580365-2580589~~~TCH1516intergenic_891806-892323~~~NCTC8325intergenic_2527319-2527926~~~NCTC8325intergenic_811453-811871~~~TCH1516intergenic_2031793-2032023~~~NCTC8325intergenic_1978212-1978642~~~USA300HOU_RS15635;DBGWAS_general_tag=hypothetical_protein
1	n136457	2030	589	589	1441	1441	0	0	No	NA	NA	NA	NA	AATCAATGTTCTATGCTCTACGAAGTTATAT	31	NCTC8325intergenic_2815019-2815472~~~TCH1516intergenic_2580365-2580589~~~TCH1516intergenic_891806-892323~~~NCTC8325intergenic_2527319-2527926~~~NCTC8325intergenic_811453-811871~~~TCH1516intergenic_2031793-2032023~~~NCTC8325intergenic_1978212-1978642~~~USA300HOU_RS15635;DBGWAS_general_tag=hypothetical_protein
1	n136716	52	0	589	52	1441	0	0	No	NA	NA	NA	NA	ATAAGTACTTGACTAATCGTAAGAAAAGAGGTTGGGACATAAATCCCTAAAAA	53	TCH1516intergenic_>1443364-1443779~~~NCTC8325intergenic_1348844-1349855
1	n136817	2001	562	589	1439	1441	0	0	No	NA	NA	NA	NA	AGTCAATTACTGCCAATATAACTTCGTAGATCATAGA	37	USA300HOU_RS00785;DBGWAS_general_tag=hypothetical_protein~~~NCTC8325intergenic_115214-116537
1	n136818	6	1	589	5	1441	0	0	No	NA	NA	NA	NA	AGTCAATTACTGCCAATATAACTTCGTAGAGCATAGA	37	USA300HOU_RS00785;DBGWAS_general_tag=hypothetical_protein~~~NCTC8325intergenic_2815019-2815472~~~NCTC8325intergenic_115214-116537~~~TCH1516intergenic_2580365-2580589~~~TCH1516intergenic_891806-892323~~~NCTC8325intergenic_2527319-2527926~~~NCTC8325intergenic_811453-811871~~~TCH1516intergenic_1380186-1380547~~~NCTC8325intergenic_1286269-1287160~~~TCH1516intergenic_2031793-2032023~~~NCTC8325intergen…
1	n137900	4	4	589	0	1441	0	0	No	NA	NA	NA	NA	AAGAGGTTGGGACATAAATCCCTAAAAAAAACAGCAG	37
1	n137901	1949	541	589	1408	1441	0	0	No	NA	NA	NA	NA	AAGAGGTTGGGACATAAATCCCTAAAAAAACAG	33
1	n138001	2	1	589	1	1441	0	0	No	NA	NA	NA	NA	CAAGCTGGGACATAAATCAATGTTCTATGCTCT	33	TCH1516intergenic_2580365-2580589~~~TCH1516intergenic_1470017-1470297~~~TCH1516intergenic_891806-892323~~~NCTC8325intergenic_2527319-2527926~~~NCTC8325intergenic_1375286-1375630~~~NCTC8325intergenic_811453-811871
1	n139498	1448	7	589	1441	1441	0	0	Yes	4.96228e-224	1.39108e-219	0.995166	-345.766	TTATTACCTTTGCTAAATATTATAAAAAGAATAGGCTGG	39	USA300HOU_RS00785;DBGWAS_general_tag=hypothetical_protein~~~SAOUHSC_00111;DBGWAS_general_tag=hypothetical_protein
1	n139499	557	557	589	0	1441	0	0	Yes	9.81467e-18	1.55443e-15	-0.173011	-9.01031	TATTACCTTTGCTAAATATTATAAAAAGATATAAGA	36	USA300HOU_RS00785;DBGWAS_general_tag=hypothetical_protein~~~SAOUHSC_00111;DBGWAS_general_tag=hypothetical_protein
1	n139693	8	6	589	2	1441	0	0	No	NA	NA	NA	NA	AGTCAACTACTGCCAATATAACTTCGTAGATCATAGA	37	USA300HOU_RS00785;DBGWAS_general_tag=hypothetical_protein~~~NCTC8325intergenic_2815019-2815472~~~NCTC8325intergenic_115214-116537~~~TCH1516intergenic_2580365-2580589~~~TCH1516intergenic_891806-892323~~~NCTC8325intergenic_2527319-2527926~~~NCTC8325intergenic_811453-811871~~~TCH1516intergenic_1380186-1380547~~~NCTC8325intergenic_1286269-1287160~~~TCH1516intergenic_2031793-2032023~~~NCTC8325intergen…
1	n139727	1	1	589	0	1441	0	0	No	NA	NA	NA	NA	ATTTATATTTTTTGTACATTATTAATATCACTATTACCTTTGCTAAATATTATAAAAAGAT	61	USA300HOU_RS00785;DBGWAS_general_tag=hypothetical_protein~~~SAOUHSC_00111;DBGWAS_general_tag=hypothetical_protein
1	n140332	1	1	589	0	1441	0	0	No	NA	NA	NA	NA	TTCTACAAACCTACGAGATGCATAAAACCCGATAAAGTCCGTATAATTGTGTAAAAGT	58	TCH1516intergenic_1179209-1179516~~~NCTC8325intergenic_1085307-1085614
1	n140899	2006	565	589	1441	1441	0	0	No	NA	NA	NA	NA	ATTATTAATATCATTATTACCTTTGCTAAATATTATAAAA	40	USA300HOU_RS00785;DBGWAS_general_tag=hypothetical_protein~~~SAOUHSC_00111;DBGWAS_general_tag=hypothetical_protein
1	n141148	1980	573	589	1407	1441	0	0	No	NA	NA	NA	NA	CATAGAACATTGATTTATGTCCCAGCCTGAAGAT	34	TCH1516intergenic_2580365-2580589~~~TCH1516intergenic_1470017-1470297~~~TCH1516intergenic_891806-892323~~~NCTC8325intergenic_2527319-2527926~~~NCTC8325intergenic_1375286-1375630~~~NCTC8325intergenic_811453-811871
1	n141149	2018	580	589	1438	1441	0	0	No	NA	NA	NA	NA	CATAGAACATTGATTTATGTCCCAGCCTGATC	32	TCH1516intergenic_2580365-2580589~~~TCH1516intergenic_1470017-1470297~~~TCH1516intergenic_891806-892323~~~NCTC8325intergenic_2527319-2527926~~~NCTC8325intergenic_1375286-1375630~~~NCTC8325intergenic_811453-811871
1	n141262	4	4	589	0	1441	0	0	No	NA	NA	NA	NA	ATAGGCTGGGAAATAAATCAATGTTCTATGCTCTAC	36	NCTC8325intergenic_115214-116537
1	n141576	556	556	589	0	1441	0	0	Yes	9.66558e-17	1.50531e-14	-0.162715	-8.72623	ATCTTTTTATAATATTTAGCAAAGGTAATAA	31	USA300HOU_RS00785;DBGWAS_general_tag=hypothetical_protein~~~SAOUHSC_00111;DBGWAS_general_tag=hypothetical_protein
1	n141750	2004	563	589	1441	1441	0	0	No	NA	NA	NA	NA	TCATTATTACCTTTGCTAAATATTATAAAAAGA	33	USA300HOU_RS00785;DBGWAS_general_tag=hypothetical_protein~~~SAOUHSC_00111;DBGWAS_general_tag=hypothetical_protein
1	n142400	2010	570	589	1440	1441	0	0	No	NA	NA	NA	NA	ATGTACAAAAAATATAAATCAAATCGACATCCT	33	USA300HOU_RS00785;DBGWAS_general_tag=hypothetical_protein~~~SAOUHSC_00111;DBGWAS_general_tag=hypothetical_protein
1	n142625	2029	589	589	1440	1441	0	0	No	NA	NA	NA	NA	AGAGCATAGAACATTGATTTATGTCCCAGCC	31	TCH1516intergenic_2580365-2580589~~~TCH1516intergenic_1470017-1470297~~~TCH1516intergenic_891806-892323~~~NCTC8325intergenic_2527319-2527926~~~NCTC8325intergenic_1375286-1375630~~~NCTC8325intergenic_811453-811871
1	n142668	2030	589	589	1441	1441	0	0	No	NA	NA	NA	NA	AGCATAGAACATTGATTTATGTCCCAGCCTG	31	TCH1516intergenic_2580365-2580589~~~TCH1516intergenic_1470017-1470297~~~TCH1516intergenic_891806-892323~~~NCTC8325intergenic_2527319-2527926~~~NCTC8325intergenic_1375286-1375630~~~NCTC8325intergenic_811453-811871
1	n142921	2029	589	589	1440	1441	0	0	No	NA	NA	NA	NA	AGGCTGGGACATAAATCAATGTTCTATGCTC	31	TCH1516intergenic_2580365-2580589~~~TCH1516intergenic_1470017-1470297~~~TCH1516intergenic_891806-892323~~~NCTC8325intergenic_2527319-2527926~~~NCTC8325intergenic_1375286-1375630~~~NCTC8325intergenic_811453-811871
1	n143485	538	538	589	0	1441	0	0	Yes	5.34735e-16	8.01616e-14	-0.155097	-8.46078	TCTTTTTCTTATATCTTTTTATAATATTTAGCAAAG	36	SAOUHSC_00111;DBGWAS_general_tag=hypothetical_protein
1	n143554	2025	588	589	1437	1441	0	0	No	NA	NA	NA	NA	CTGGGACATAAATCAATGTTCTATGCTCTAC	31	TCH1516intergenic_2580365-2580589~~~TCH1516intergenic_1470017-1470297~~~TCH1516intergenic_891806-892323~~~NCTC8325intergenic_2527319-2527926~~~NCTC8325intergenic_1375286-1375630~~~NCTC8325intergenic_811453-811871~~~TCH1516intergenic_2031793-2032023~~~NCTC8325intergenic_1978212-1978642
1	n143556	1935	496	589	1439	1441	0	0	No	NA	NA	NA	NA	CGAAAATATCATTTCTGTCCCACCTCACTCAA	32	NCTC8325intergenic_775477-776118
1	n143654	1879	546	589	1333	1441	0	0	No	NA	NA	NA	NA	TAAAAGAGGTTGGGACATAAATCCCTAAAAA	31	TCH1516intergenic_>1443364-1443779~~~NCTC8325intergenic_1348844-1349855
1	n143712	2009	568	589	1441	1441	0	0	No	NA	NA	NA	NA	TACTGCCAATATAACTTCGTAGATCATAGAA	31	USA300HOU_RS00785;DBGWAS_general_tag=hypothetical_protein~~~NCTC8325intergenic_115214-116537
1	n143715	9	9	589	0	1441	0	0	No	NA	NA	NA	NA	CTTTTACACAATTATACGGACTTTATCGGTTCGTTTACATATTTCCCCAATATAAT	56	TCH1516intergenic_2267945-2268649~~~NCTC8325intergenic_2214417-2215121
1	n143761	2026	589	589	1437	1441	0	0	No	NA	NA	NA	NA	TAGAGCATAGAACATTGATTTATGTCCCAGC	31	TCH1516intergenic_2580365-2580589~~~TCH1516intergenic_1470017-1470297~~~TCH1516intergenic_891806-892323~~~NCTC8325intergenic_2527319-2527926~~~NCTC8325intergenic_1375286-1375630~~~NCTC8325intergenic_811453-811871~~~TCH1516intergenic_2031793-2032023~~~NCTC8325intergenic_1978212-1978642
1	n143796	2030	589	589	1441	1441	0	0	No	NA	NA	NA	NA	TCAGGCTGGGACATAAATCAATGTTCTATGC	31	TCH1516intergenic_2580365-2580589~~~TCH1516intergenic_1470017-1470297~~~TCH1516intergenic_891806-892323~~~NCTC8325intergenic_2527319-2527926~~~NCTC8325intergenic_1375286-1375630~~~NCTC8325intergenic_811453-811871
1	n143929	2	0	589	2	1441	0	0	No	NA	NA	NA	NA	TTTTTTTAGGGATTTATGTCCCAACCTCTTCTTACGATTAGTCAAGTACTTATA	54
1	n151116	1989	561	589	1428	1441	0	0	No	NA	NA	NA	NA	AATTAGAGTAAGAGGCTGGGACATAAATCCC	31	TCH1516intergenic_318637-318882~~~NCTC8325intergenic_264152-264824
1	n151117	1	1	589	0	1441	0	0	No	NA	NA	NA	NA	TAATTAGAGTAAGAGGCTGGGACATAAATCTCTAAAAAACAGCAGTAAGATAATTTTCAAT	61	TCH1516intergenic_1804712-1805352~~~NCTC8325intergenic_1705641-1707965~~~TCH1516intergenic_2478113-2478687~~~TCH1516intergenic_2071731-2072077~~~NCTC8325intergenic_2018124-2018696~~~TCH1516intergenic_318637-318882~~~NCTC8325intergenic_264152-264824~~~TCH1516intergenic_2317347-2317802~~~TCH1516intergenic_1893139-1893485~~~NCTC8325intergenic_2263981-2266096~~~NCTC8325intergenic_1794848-1796426~~~TC…
1	n153561	1	0	589	1	1441	0	0	No	NA	NA	NA	NA	CCCTAACAACCTGAGGTCACTACGCTTCCATTCGCCTGCGCTTTAGCGCATGCATAAAAG	60	TCH1516intergenic_2504696-2505099~~~NCTC8325intergenic_2451645-2452048
1	n153564	1	0	589	1	1441	0	0	No	NA	NA	NA	NA	CCCCTAACAACCTGAGGTCACTACGCTTCGTTTCGCCTGCGCTTTAGCGCATGCATAAAAG	61	TCH1516intergenic_2504696-2505099~~~NCTC8325intergenic_2451645-2452048
1	n153830	1	1	589	0	1441	0	0	No	NA	NA	NA	NA	TACTGCTGTTTTTTTTAGGGATTAATGTCCAGACTCTTTAGTTTATTATTTTCAATATAACAATTGTCTAATCAA	75	TCH1516intergenic_2478113-2478687~~~NCTC8325intergenic_2425060-2426130
1	n154273	1	1	589	0	1441	0	0	No	NA	NA	NA	NA	ATTAATAATGTACAAAAAATATAAATCAAAACGACATCCTTATAAAACATCAGAACCACTA	61	USA300HOU_RS00785;DBGWAS_general_tag=hypothetical_protein~~~SAOUHSC_00111;DBGWAS_general_tag=hypothetical_protein
1	n154559	2011	571	589	1440	1441	0	0	No	NA	NA	NA	NA	CTTATAAAACATCAGAACCACTAAAAACAAAAAAG	35
1	n154620	2000	572	589	1428	1441	0	0	No	NA	NA	NA	NA	ATAATTAGAGTAAGAGGCTGGGACATAAATC	31	TCH1516intergenic_318637-318882~~~NCTC8325intergenic_264152-264824
1	n155550	2028	587	589	1441	1441	0	0	No	NA	NA	NA	NA	CTTATCAATAAATTATTACTTATTACTTTCCATTTCATCTAATTTATG	48	TCH1516intergenic_2825185-2826032~~~NCTC8325intergenic_2773601-2774449
1	n155551	1	1	589	0	1441	0	0	No	NA	NA	NA	NA	CTTATCAATAAATTATTACTTATTACTTTCTATTTCATCTAATTTATGCGGATTTCCTGTA	61	TCH1516intergenic_2825185-2826032~~~NCTC8325intergenic_2773601-2774449
1	n156155	1892	464	589	1428	1441	0	0	No	NA	NA	NA	NA	CTCTTATGCATGCGCTTAGCGCAGGCGCTCCTACTTTTAAA	41	TCH1516intergenic_2265137-2265636
1	n157286	2010	570	589	1440	1441	0	0	No	NA	NA	NA	NA	CGACATCCTTATAAAACATCAGAACCACTAAAAACAA	37	USA300HOU_RS00785;DBGWAS_general_tag=hypothetical_protein~~~SAOUHSC_00111;DBGWAS_general_tag=hypothetical_protein
1	n162843	2015	584	589	1431	1441	0	0	No	NA	NA	NA	NA	CAACCTTGCTGGGGTGGGACGACGAAATAAAT	32	NCTC8325intergenic_2815019-2815472~~~USA300HOU_RS15635;DBGWAS_general_tag=hypothetical_protein
1	n163335	2028	588	589	1440	1441	0	0	No	NA	NA	NA	NA	GTAACGTATTCTCTTTCAACTCGCTACTTCGCATAC	36	TCH1516intergenic_2672042-2672421~~~NCTC8325intergenic_2620534-2620913
1	n165528	2029	589	589	1440	1441	0	0	No	NA	NA	NA	NA	GAAGTAGCGAGTTGAAAGAGAATACGTTACAAAAG	35	TCH1516intergenic_2672042-2672421~~~NCTC8325intergenic_2620534-2620913
1	n167743	4	4	589	0	1441	0	0	No	NA	NA	NA	NA	TGTACATTATTAATATCATTATTACCTTTGATAAATATTATAAAAAGATATAAGAAAAAGA	61	USA300HOU_RS00785;DBGWAS_general_tag=hypothetical_protein~~~SAOUHSC_00111;DBGWAS_general_tag=hypothetical_protein
1	n169007	1	0	589	1	1441	0	0	No	NA	NA	NA	NA	TTATATAATTTTTATTTACATTTTTAACTTGTAAAAAAAGCGCCTATGTCATGATTTACCA	61	TCH1516intergenic_2825185-2826032~~~NCTC8325intergenic_2773601-2774449
1	n169034	1	0	589	1	1441	0	0	No	NA	NA	NA	NA	TCGTAAAATTTATTTCGTCGTCCTACCCCAACTTGCATTGTCTGTAGAA	49	USA300HOU_RS15255;DBGWAS_general_tag=hypothetical_protein~~~SAOUHSC_01118;DBGWAS_general_tag=hypothetical_protein
1	n170462	3	3	589	0	1441	0	0	No	NA	NA	NA	NA	CTCTTTTTCTTATATCTTTTTATAATATTTA	31	SAOUHSC_00111;DBGWAS_general_tag=hypothetical_protein
1	n171033	9	7	589	2	1441	0	0	No	NA	NA	NA	NA	AATCCCTAAAAAAAAACAGCAGTAAGATAATTTTCAAT	38
1	n171040	81	81	589	0	1441	0	0	No	NA	NA	NA	NA	GACATTAATCCCTAAAAAAAACAGCAGTAAAATAATTTTCAATT	44
1	n171041	1776	469	589	1307	1441	0	0	Yes	0.000427261	0.0234588	0.0292461	-3.52718	AAAAAAAACAGCAGTAAGATAATTTTCAATT	31
1	n171065	82	82	589	0	1441	0	0	No	NA	NA	NA	NA	AAAAAAACAGCAGTAAAATAATTTTCAATTAGAAAATATCTTACTGC	47	TCH1516intergenic_1804712-1805352~~~NCTC8325intergenic_1705641-1707965~~~TCH1516intergenic_2478113-2478687~~~NCTC8325intergenic_2425060-2426130~~~TCH1516intergenic_2071731-2072077~~~NCTC8325intergenic_2018124-2018696~~~TCH1516intergenic_318637-318882~~~NCTC8325intergenic_264152-264824~~~TCH1516intergenic_2317347-2317802~~~TCH1516intergenic_1893139-1893485~~~NCTC8325intergenic_2263981-2266096~~~NC…
1	n171066	2030	589	589	1441	1441	0	0	No	NA	NA	NA	NA	AAAAAAACAGCAGTAAGATAATTTTCAATTA	31
1	n171067	1	1	589	0	1441	0	0	No	NA	NA	NA	NA	TAAAAAAACAGCAGTAAGATAATTTTCAATGAGAAAATATCTTACTGCTGTTCTCTATTTA	61	TCH1516intergenic_1804712-1805352~~~NCTC8325intergenic_1705641-1707965~~~TCH1516intergenic_2478113-2478687~~~NCTC8325intergenic_2425060-2426130~~~TCH1516intergenic_2071731-2072077~~~NCTC8325intergenic_2018124-2018696~~~TCH1516intergenic_318637-318882~~~NCTC8325intergenic_264152-264824~~~TCH1516intergenic_2317347-2317802~~~TCH1516intergenic_1893139-1893485~~~NCTC8325intergenic_2263981-2266096~~~NC…
1	n171068	1	1	589	0	1441	0	0	No	NA	NA	NA	NA	ATCCCTAAAAAAACAGCAGTAAGATAATTTGCCAAACTTGCACATAAATGTTTAATT	57	TCH1516intergenic_2317347-2317802~~~NCTC8325intergenic_2263981-2266096
1	n171158	2030	589	589	1441	1441	0	0	No	NA	NA	NA	NA	AAAAAACAGCAGTAAGATAATTTTCAATTAG	31	TCH1516intergenic_1804712-1805352~~~NCTC8325intergenic_1705641-1707965~~~TCH1516intergenic_2478113-2478687~~~TCH1516intergenic_2071731-2072077~~~NCTC8325intergenic_2018124-2018696~~~TCH1516intergenic_318637-318882~~~NCTC8325intergenic_264152-264824~~~TCH1516intergenic_2317347-2317802~~~TCH1516intergenic_1893139-1893485~~~NCTC8325intergenic_2263981-2266096~~~NCTC8325intergenic_1794848-1796426~~~TC…
1	n171428	2030	589	589	1441	1441	0	0	No	NA	NA	NA	NA	AAAAACAGCAGTAAGATAATTTTCAATTAGAAA	33	TCH1516intergenic_1804712-1805352~~~NCTC8325intergenic_1705641-1707965~~~TCH1516intergenic_2478113-2478687~~~TCH1516intergenic_2071731-2072077~~~NCTC8325intergenic_2018124-2018696~~~TCH1516intergenic_318637-318882~~~NCTC8325intergenic_264152-264824~~~TCH1516intergenic_2317347-2317802~~~TCH1516intergenic_1893139-1893485~~~NCTC8325intergenic_2263981-2266096~~~NCTC8325intergenic_1794848-1796426~~~TC…
1	n172225	1	0	589	1	1441	0	0	No	NA	NA	NA	NA	CAAAATAATATTTAATGTGGGTTAAAAGACCTTATTAAAACTCAGTTATTAGGGAGTGGGA	61	NCTC8325intergenic_977455-978260~~~TCH1516intergenic_1071528-1072182
1	n172226	2003	573	589	1430	1441	0	0	No	NA	NA	NA	NA	CAAAATAATATTTAATGTGGGTTAAAAGACTT	32	NCTC8325intergenic_977455-978260~~~TCH1516intergenic_1071528-1072182
1	n172227	5	0	589	5	1441	0	0	No	NA	NA	NA	NA	GCAAAATAATATTTAATGTGGGTTAAAAGATTTTATTAAAACTCAGTTATTAGGGAGTGGG	61	NCTC8325intergenic_977455-978260~~~TCH1516intergenic_1071528-1072182
1	n172228	9	9	589	0	1441	0	0	No	NA	NA	NA	NA	TGCAAAATAATATTTAATGTGGGTTAAAAGCCTTCATTAAAACTCAGTTATTAGGGAGTGG	61	NCTC8325intergenic_977455-978260~~~TCH1516intergenic_1071528-1072182
1	n172336	1	0	589	1	1441	0	0	No	NA	NA	NA	NA	AGAAAATATCTTACTGCTGTTCTCTATTTAATAAAATAAATTTTCTGTGTTGGGTCCCT	59	TCH1516intergenic_1804712-1805352~~~NCTC8325intergenic_1705641-1707965~~~TCH1516intergenic_2478113-2478687~~~NCTC8325intergenic_2425060-2426130~~~TCH1516intergenic_2071731-2072077~~~NCTC8325intergenic_2018124-2018696~~~TCH1516intergenic_318637-318882~~~NCTC8325intergenic_264152-264824~~~TCH1516intergenic_2317347-2317802~~~TCH1516intergenic_1893139-1893485~~~NCTC8325intergenic_2263981-2266096~~~NC…
1	n172569	1	0	589	1	1441	0	0	No	NA	NA	NA	NA	CTAATTGAAAATTATCTTACTGCTGTTTTTAGGATTTATGTCCCA	45	TCH1516intergenic_1804712-1805352~~~NCTC8325intergenic_1705641-1707965~~~TCH1516intergenic_2478113-2478687~~~TCH1516intergenic_2071731-2072077~~~NCTC8325intergenic_2018124-2018696~~~TCH1516intergenic_318637-318882~~~NCTC8325intergenic_264152-264824~~~TCH1516intergenic_2317347-2317802~~~TCH1516intergenic_1893139-1893485~~~NCTC8325intergenic_2263981-2266096~~~NCTC8325intergenic_1794848-1796426~~~TC…
1	n172572	2024	587	589	1437	1441	0	0	No	NA	NA	NA	NA	ATTGAAAATTATCTTACTGCTGTTTTTTTAGGGAT	35
1	n172573	1770	465	589	1305	1441	0	0	Yes	0.000582178	0.0309095	0.028365	-3.4442	ATTGAAAATTATCTTACTGCTGTTTTTTTTAGGGATT	37
1	n172574	3	3	589	0	1441	0	0	No	NA	NA	NA	NA	AATTGAAAATTATCTTACTGCTGTTTTTTTGTAAAAAGAAAACCATACGCTA	52
1	n172575	1	1	589	0	1441	0	0	No	NA	NA	NA	NA	AATTGAAAATTATCTTACTGCTGTTTTTTGTAAAAAGAAAACCATACGCTA	51	TCH1516intergenic_1804712-1805352~~~NCTC8325intergenic_1705641-1707965~~~TCH1516intergenic_2478113-2478687~~~TCH1516intergenic_2071731-2072077~~~NCTC8325intergenic_2018124-2018696~~~TCH1516intergenic_318637-318882~~~NCTC8325intergenic_264152-264824~~~TCH1516intergenic_2317347-2317802~~~TCH1516intergenic_1893139-1893485~~~NCTC8325intergenic_2263981-2266096~~~NCTC8325intergenic_1794848-1796426~~~TC…
1	n172576	1	1	589	0	1441	0	0	No	NA	NA	NA	NA	AATTGAAAATTATCTTACTGCTGTTTTTTGGGGATTTATGTCCCAGCCTCTTACTCTAAT	60	TCH1516intergenic_1804712-1805352~~~NCTC8325intergenic_1705641-1707965~~~TCH1516intergenic_2478113-2478687~~~TCH1516intergenic_2071731-2072077~~~NCTC8325intergenic_2018124-2018696~~~TCH1516intergenic_318637-318882~~~NCTC8325intergenic_264152-264824~~~TCH1516intergenic_2317347-2317802~~~TCH1516intergenic_1893139-1893485~~~NCTC8325intergenic_2263981-2266096~~~NCTC8325intergenic_1794848-1796426~~~TC…
1	n172734	1	0	589	1	1441	0	0	No	NA	NA	NA	NA	TTTTCTTGTTATTCATTGCAATTGCAAAATGATATTTAATGTGGGTTAAAAGACTTTATTA	61	NCTC8325intergenic_977455-978260~~~TCH1516intergenic_1071528-1072182
1	n173214	2001	562	589	1439	1441	0	0	No	NA	NA	NA	NA	GAAACACTAATAAATGTCCTATAGTTTACAATATT	35	USA300HOU_RS15360;DBGWAS_general_tag=hypothetical_protein~~~NCTC8325intergenic_1776134-1776997
1	n173455	2001	562	589	1439	1441	0	0	No	NA	NA	NA	NA	TGTAAACTATAGGACATTTATTAGTGTTTCAGGTTCTTTATCG	43	USA300HOU_RS15360;DBGWAS_general_tag=hypothetical_protein~~~NCTC8325intergenic_1776134-1776997
1	n173456	1	0	589	1	1441	0	0	No	NA	NA	NA	NA	TGTAAACTATAGGACATTTATTAGTGTTTCGGACAGAAATGATATTTTCGTAAAATTTAT	60	USA300HOU_RS15360;DBGWAS_general_tag=hypothetical_protein~~~NCTC8325intergenic_1776134-1776997~~~NCTC8325intergenic_977455-978260
1	n173750	565	565	589	0	1441	0	0	Yes	3.92862e-14	5.32033e-12	-0.184414	-8.50488	AAATAATATTTAATGTGGGTTAAAAGACTTCATTAAAACTCAGTTATTA	49	NCTC8325intergenic_977455-978260~~~TCH1516intergenic_1071528-1072182
1	n173751	1438	8	589	1430	1441	0	0	Yes	2.42746e-12	2.93314e-10	0.188001	-8.23788	AAATAATATTTAATGTGGGTTAAAAGACTTTATTA	35	NCTC8325intergenic_977455-978260~~~TCH1516intergenic_1071528-1072182
1	n174184	3	3	589	0	1441	0	0	No	NA	NA	NA	NA	ACAGGCTGGGACATAAATCCCTAAAAAAAAACAGCAGTAAGATAA	45
1	n174185	21	21	589	0	1441	0	0	No	NA	NA	NA	NA	TGGGACATAAATCCCTAAAAAAAACAGCAGTAAGATAAT	39
1	n174186	2024	587	589	1437	1441	0	0	No	NA	NA	NA	NA	ATAAATCCCTAAAAAAACAGCAGTAAGATAATT	33
1	n174361	2023	583	589	1440	1441	0	0	No	NA	NA	NA	NA	TAAATTATATTGGGGAAATATGTAAACGAACCG	33	TCH1516intergenic_2267945-2268649~~~NCTC8325intergenic_2214417-2215121
1	n174368	2024	587	589	1437	1441	0	0	No	NA	NA	NA	NA	AAATTATCTTACTGCTGTTTTTTTAGGGATT	31
1	n175767	2	1	589	1	1441	0	0	No	NA	NA	NA	NA	AACAGCAGTAAGATAATTTCTAATTGAAAATTAT	34
1	n175768	2029	589	589	1440	1441	0	0	No	NA	NA	NA	NA	AACAGCAGTAAGATAATTTTCAATTAGAAAAT	32	TCH1516intergenic_1804712-1805352~~~NCTC8325intergenic_1705641-1707965~~~TCH1516intergenic_2478113-2478687~~~TCH1516intergenic_2071731-2072077~~~NCTC8325intergenic_2018124-2018696~~~TCH1516intergenic_318637-318882~~~NCTC8325intergenic_264152-264824~~~TCH1516intergenic_2317347-2317802~~~TCH1516intergenic_1893139-1893485~~~NCTC8325intergenic_2263981-2266096~~~NCTC8325intergenic_1794848-1796426~~~TC…
1	n175769	1	0	589	1	1441	0	0	No	NA	NA	NA	NA	AACAGCAGTAAGATAATTTTCAATTAGAAATTATCTTACTGC	42	TCH1516intergenic_1804712-1805352~~~NCTC8325intergenic_1705641-1707965~~~TCH1516intergenic_2478113-2478687~~~TCH1516intergenic_2071731-2072077~~~NCTC8325intergenic_2018124-2018696~~~TCH1516intergenic_318637-318882~~~NCTC8325intergenic_264152-264824~~~TCH1516intergenic_2317347-2317802~~~TCH1516intergenic_1893139-1893485~~~NCTC8325intergenic_2263981-2266096~~~NCTC8325intergenic_1794848-1796426~~~TC…
1	n177358	48	25	589	23	1441	0	0	No	NA	NA	NA	NA	AATTATCTTACTGCTGTTTTTTTAGGGATTA	31
1	n177658	2013	575	589	1438	1441	0	0	No	NA	NA	NA	NA	TAATTGAAAATTATCTTACTGCTGTTTTTTAG	32	TCH1516intergenic_1804712-1805352~~~NCTC8325intergenic_1705641-1707965~~~TCH1516intergenic_2478113-2478687~~~TCH1516intergenic_2071731-2072077~~~NCTC8325intergenic_2018124-2018696~~~TCH1516intergenic_318637-318882~~~NCTC8325intergenic_264152-264824~~~TCH1516intergenic_2317347-2317802~~~TCH1516intergenic_1893139-1893485~~~NCTC8325intergenic_2263981-2266096~~~NCTC8325intergenic_1794848-1796426~~~TC…
1	n177659	2024	587	589	1437	1441	0	0	No	NA	NA	NA	NA	AATTGAAAATTATCTTACTGCTGTTTTTTTA	31
1	n177983	1438	8	589	1430	1441	0	0	Yes	7.19469e-14	9.51362e-12	0.205956	-8.81784	ATATTTAATGTGGGTTAAAAGACTTTATTAAAACTCAGTTATTAGGGAGTGGG	53	TCH1516intergenic_1071528-1072182
1	n178920	1	0	589	1	1441	0	0	No	NA	NA	NA	NA	AAAATAAATAAACTAAAGAGTCTGGGACATCAATCCCTAAAAAAAACAGCAGTAAGATAAT	61	TCH1516intergenic_2478113-2478687~~~NCTC8325intergenic_2425060-2426130
1	n178985	1742	450	589	1292	1441	0	0	No	0.0263956	0.822863	0.0186643	-2.22207	GACATTAATCCCTAAAAAAAACAGCAGTAAGAT	33
1	n179691	2021	582	589	1439	1441	0	0	No	NA	NA	NA	NA	ACTAATAAATGTCCTATAGTTTACAATATTATA	33	USA300HOU_RS15360;DBGWAS_general_tag=hypothetical_protein~~~NCTC8325intergenic_1776134-1776997
1	n179840	1	1	589	0	1441	0	0	No	NA	NA	NA	NA	AAATATTATTTCTGTCCCACTCCCTTTTTATTTTGCTTTTAATACTTACAACC	53	TCH1516intergenic_1542739-1542928~~~NCTC8325intergenic_1445414-1445603
1	n180458	2029	589	589	1440	1441	0	0	No	NA	NA	NA	NA	TATAAATAGAGAACAGCAGTAAGATATTTTCT	32	TCH1516intergenic_1804712-1805352~~~NCTC8325intergenic_1705641-1707965~~~TCH1516intergenic_2478113-2478687~~~NCTC8325intergenic_2425060-2426130~~~TCH1516intergenic_2071731-2072077~~~NCTC8325intergenic_2018124-2018696~~~TCH1516intergenic_318637-318882~~~NCTC8325intergenic_264152-264824~~~TCH1516intergenic_2317347-2317802~~~TCH1516intergenic_1893139-1893485~~~NCTC8325intergenic_2263981-2266096~~~NC…
1	n181029	1	1	589	0	1441	0	0	No	NA	NA	NA	NA	GAAAATATCATTTCTTTCCCACTCCCTAATAACTGAGTTTTAATGA	46	NCTC8325intergenic_977455-978260~~~TCH1516intergenic_1071528-1072182
1	n181094	2010	572	589	1438	1441	0	0	No	NA	NA	NA	NA	ATCCCTAAAAAACAGCAGTAAGATAATTTTCAA	33	TCH1516intergenic_2071731-2072077~~~NCTC8325intergenic_2018124-2018696~~~TCH1516intergenic_318637-318882~~~NCTC8325intergenic_264152-264824~~~TCH1516intergenic_1893139-1893485~~~NCTC8325intergenic_1794848-1796426
1	n181303	1752	460	589	1292	1441	0	0	No	0.028963	0.882523	0.0183521	-2.18578	ATTAATCCCTAAAAAAAACAGCAGTAAGATAAT	33
1	n181466	7	4	589	3	1441	0	0	No	NA	NA	NA	NA	ATTCCTAAAAAACAGCAGTAAGATAATTTTCAA	33	TCH1516intergenic_2071731-2072077~~~NCTC8325intergenic_2018124-2018696~~~TCH1516intergenic_318637-318882~~~NCTC8325intergenic_264152-264824~~~TCH1516intergenic_1893139-1893485~~~NCTC8325intergenic_1794848-1796426
1	n181694	2013	575	589	1438	1441	0	0	No	NA	NA	NA	NA	ATTGAAAATTATCTTACTGCTGTTTTTTAGG	31	TCH1516intergenic_1804712-1805352~~~NCTC8325intergenic_1705641-1707965~~~TCH1516intergenic_2478113-2478687~~~TCH1516intergenic_2071731-2072077~~~NCTC8325intergenic_2018124-2018696~~~TCH1516intergenic_318637-318882~~~NCTC8325intergenic_264152-264824~~~TCH1516intergenic_2317347-2317802~~~TCH1516intergenic_1893139-1893485~~~NCTC8325intergenic_2263981-2266096~~~NCTC8325intergenic_1794848-1796426~~~TC…
1	n182012	5	1	589	4	1441	0	0	No	NA	NA	NA	NA	AGAGAACAGCAGTAAGATAATTTTCAATTAGAAA	34	TCH1516intergenic_1804712-1805352~~~NCTC8325intergenic_1705641-1707965~~~TCH1516intergenic_2478113-2478687~~~TCH1516intergenic_2071731-2072077~~~NCTC8325intergenic_2018124-2018696~~~TCH1516intergenic_318637-318882~~~NCTC8325intergenic_264152-264824~~~TCH1516intergenic_2317347-2317802~~~TCH1516intergenic_1893139-1893485~~~NCTC8325intergenic_2263981-2266096~~~NCTC8325intergenic_1794848-1796426~~~TC…
1	n182382	2	2	589	0	1441	0	0	No	NA	NA	NA	NA	CAAAAAACAGCAGTAAGATAATTTTCAATTA	31	TCH1516intergenic_1804712-1805352~~~NCTC8325intergenic_1705641-1707965~~~TCH1516intergenic_2478113-2478687~~~TCH1516intergenic_2071731-2072077~~~NCTC8325intergenic_2018124-2018696~~~TCH1516intergenic_318637-318882~~~NCTC8325intergenic_264152-264824~~~TCH1516intergenic_2317347-2317802~~~TCH1516intergenic_1893139-1893485~~~NCTC8325intergenic_2263981-2266096~~~NCTC8325intergenic_1794848-1796426~~~TC…
1	n183044	2029	588	589	1441	1441	0	0	No	NA	NA	NA	NA	TACTGCTGTTTTTTTAGGGATTTATGTCCCA	31
1	n183143	2009	573	589	1436	1441	0	0	No	NA	NA	NA	NA	TCTTTTAACCCACATTAAATATTATTTTGCA	31	NCTC8325intergenic_977455-978260~~~TCH1516intergenic_1071528-1072182
1	n183163	1823	531	589	1292	1441	0	0	No	0.035853	0.999878	0.0174479	-2.10057	TTACTGCTGTTTTTTTTAGGGATTAATGTCC	31
1	n183308	2004	573	589	1431	1441	0	0	No	NA	NA	NA	NA	GCAAAATAATATTTAATGTGGGTTAAAAGAC	31	NCTC8325intergenic_977455-978260~~~TCH1516intergenic_1071528-1072182
1	n184289	1	1	589	0	1441	0	0	No	NA	NA	NA	NA	TTAAAAGACTTCATTAAAACTCAGTTATTACGGAGTGGGACAGAAATGATATTTTC	56	NCTC8325intergenic_977455-978260
1	n184290	2005	576	589	1429	1441	0	0	No	NA	NA	NA	NA	ATTAAAACTCAGTTATTAGGGAGTGGGACAGAAAT	35	NCTC8325intergenic_977455-978260~~~TCH1516intergenic_1071528-1072182
1	n184325	1	0	589	1	1441	0	0	No	NA	NA	NA	NA	AAATATTGTAGTTTTACATGTAAAAGAAAACGAATATATACATCTTTAGTTTAGTATTATA	61	TCH1516intergenic_756512-756724~~~NCTC8325intergenic_675684-675902
1	n184851	21	21	589	0	1441	0	0	No	NA	NA	NA	NA	TGTAAAAGAAAATGAATATATACATCTTTAATTTAGTATTATAACTATAACTAGCATGTCTTT	63	TCH1516intergenic_756512-756724~~~NCTC8325intergenic_675684-675902
1	n184852	12	0	589	12	1441	0	0	No	NA	NA	NA	NA	TAAAAGAAAATGAATATATACATCTTTAGTATAGTATTATAACTAGCATGTCTTTAAATGA	61	TCH1516intergenic_756512-756724~~~NCTC8325intergenic_675684-675902
1	n184853	1953	566	589	1387	1441	0	0	No	NA	NA	NA	NA	TAAAAGAAAATGAATATATACATCTTTAGTCTAGTATTA	39	TCH1516intergenic_756512-756724~~~NCTC8325intergenic_675684-675902
1	n184854	39	0	589	39	1441	0	0	No	NA	NA	NA	NA	TAAAAGAAAATGAATATATACATCTTTAGTTTAGTATTATA	41	TCH1516intergenic_756512-756724~~~NCTC8325intergenic_675684-675902
1	n185039	563	563	589	0	1441	0	0	Yes	2.7378e-12	3.2659e-10	-0.159265	-7.73248	AAAAGACTTCATTAAAACTCAGTTATTAGGGAGTG	35	NCTC8325intergenic_977455-978260
1	n186050	2024	584	589	1440	1441	0	0	No	NA	NA	NA	NA	CAATTAAATATCAACAGGAATAACGAATAATATAAA	36
1	n186790	3	0	589	3	1441	0	0	No	NA	NA	NA	NA	TAAATAGCTCAATAAAATATTGTAGTTTTAAATGTAAAAGAAAATGAATATATACATCTTT	61	TCH1516intergenic_756512-756724~~~NCTC8325intergenic_675684-675902
1	n187028	3	0	589	3	1441	0	0	No	NA	NA	NA	NA	AAAGATGTATATATTCATTTTCTTTTACATATAAAACTACAATATTTTATTGAGCTATTTA	61	TCH1516intergenic_756512-756724~~~NCTC8325intergenic_675684-675902
1	n187029	2019	587	589	1432	1441	0	0	No	NA	NA	NA	NA	AAAGATGTATATATTCATTTTCTTTTACATGT	32	TCH1516intergenic_756512-756724~~~NCTC8325intergenic_675684-675902
1	n188681	40	0	589	40	1441	0	0	No	NA	NA	NA	NA	GAATATATACATCTTTAGTTTAGTATTATAACTAGCATGTCTTTAAATGA	50	TCH1516intergenic_756512-756724
1	n188697	9	0	589	9	1441	0	0	No	NA	NA	NA	NA	AATATCAACAGGAATAACGAATAATATAAAGAGGTTGGGACATAAATCCCTAAAAAA	57	TCH1516intergenic_>1443364-1443779~~~NCTC8325intergenic_1348844-1349855
1	n189273	1	1	589	0	1441	0	0	No	NA	NA	NA	NA	ACCATATCATGATAGCATATTCATAGATTAATTCATAGTCAAGTCCAGACTCCTGTGTAA	60
1	n190486	1	0	589	1	1441	0	0	No	NA	NA	NA	NA	GCTCACTATATGACAATAAAGTTCATGTATGATAAAGTCCGTATAATTGTGTAAAAG	57	USA300HOU_RS03170;DBGWAS_general_tag=hypothetical_protein~~~SAOUHSC_00598;DBGWAS_general_tag=hypothetical_protein
1	n191459	2004	566	589	1438	1441	0	0	No	NA	NA	NA	NA	ACTAAAGATGTATATATTCATTTTCTTTTACA	32	TCH1516intergenic_756512-756724~~~NCTC8325intergenic_675684-675902
1	n191724	562	562	589	0	1441	0	0	Yes	7.10629e-12	8.23185e-10	-0.151622	-7.52599	ACTTCATTAAAACTCAGTTATTAGGGAGTGG	31	NCTC8325intergenic_977455-978260
1	n191808	1965	548	589	1417	1441	0	0	No	NA	NA	NA	NA	GGGACTTTTATGCATGCGCTAAAGCGCAGGCGAA	34	TCH1516intergenic_2504696-2505099~~~NCTC8325intergenic_2451645-2452048
1	n192729	8	3	589	5	1441	0	0	No	NA	NA	NA	NA	ATAGCGTATGGTTTTCTTTTTACAAAAAAAC	31
1	n192730	2	2	589	0	1441	0	0	No	NA	NA	NA	NA	ATAGCGTATGGTTTTCTTTTTACAAAAAAATC	32
1	n192731	2	2	589	0	1441	0	0	No	NA	NA	NA	NA	ATAGCGTATGGTTTTCTTTTTACAAAAAAAGC	32
1	n192732	1746	324	589	1422	1441	0	0	No	0.619199	0.999878	-0.006277	0.496827	ATAGCGTATGGTTTTCTTTTTACAAAAAACA	31	TCH1516intergenic_1456886-1457129
1	n193694	2025	587	589	1438	1441	0	0	No	NA	NA	NA	NA	ATGTAAAAGAAAATGAATATATACATCTTTA	31	TCH1516intergenic_756512-756724~~~NCTC8325intergenic_675684-675902
1	n193709	2006	587	589	1419	1441	0	0	No	NA	NA	NA	NA	AGATGTATATATTCATTTTCTTTTACATGTAAAA	34	TCH1516intergenic_756512-756724~~~NCTC8325intergenic_675684-675902
1	n193710	13	0	589	13	1441	0	0	No	NA	NA	NA	NA	AGATGTATATATTCATTTTCTTTTACATGTGAAACTACAATATTTTATTGAGCTATTTAAT	61	TCH1516intergenic_756512-756724~~~NCTC8325intergenic_675684-675902
1	n193998	1	1	589	0	1441	0	0	No	NA	NA	NA	NA	AGCGTATGGTTTTCTTTTTACAAAAAAACTAGATTCCATATGAAAATGAAA	51
1	n193999	5	0	589	5	1441	0	0	No	NA	NA	NA	NA	AGCGTATGGTTTTCTTTTTACAAAAAAACTGATGCCCTTAAAACAGGACAC	51
1	n194001	1	1	589	0	1441	0	0	No	NA	NA	NA	NA	AGCGTATGGTTTTCTTTTTACAAAAAAAGCACTTCCCAAAAATGGAAAGTG	51
1	n194002	1	1	589	0	1441	0	0	No	NA	NA	NA	NA	AGCGTATGGTTTTCTTTTTACAAAAAAAGCGCCTATGTCATGATTTACCAT	51
1	n194074	6	1	589	5	1441	0	0	No	NA	NA	NA	NA	AGTTTTTTTGTAAAAAGAAAACCATACGCTA	31
1	n194299	12	7	589	5	1441	0	0	No	NA	NA	NA	NA	CATAGCGTATGGTTTTCTTTTTACAAAAAAA	31
1	n194312	569	569	589	0	1441	0	0	Yes	4.38024e-14	5.90343e-12	-0.18086	-8.42336	TCATTAAAACTCAGTTATTAGGGAGTGGGACA	32	NCTC8325intergenic_977455-978260~~~TCH1516intergenic_1071528-1072182
1	n194405	570	570	589	0	1441	0	0	Yes	3.65445e-15	5.25361e-13	-0.193675	-8.91152	TCCCACTCCCTAATAACTGAGTTTTAATGAAG	32	NCTC8325intergenic_977455-978260~~~TCH1516intergenic_1071528-1072182
1	n194432	564	564	589	0	1441	0	0	Yes	2.38626e-13	3.08268e-11	-0.171622	-8.16621	CCTAATAACTGAGTTTTAATGAAGTCTTTTAA	32	NCTC8325intergenic_977455-978260
1	n194576	2024	583	589	1441	1441	0	0	No	NA	NA	NA	NA	CTTTTATGCATGCGCTAAAGCGCAGGCGAAC	31	TCH1516intergenic_2504696-2505099~~~NCTC8325intergenic_2451645-2452048
1	n194650	2022	581	589	1441	1441	0	0	No	NA	NA	NA	NA	TTCGCCTGCGCTTTAGCGCATGCATAAAAGCCC	33	TCH1516intergenic_2504696-2505099~~~NCTC8325intergenic_2451645-2452048
1	n194681	1973	555	589	1418	1441	0	0	No	NA	NA	NA	NA	CGTTCGCCTGCGCTTTAGCGCATGCATAAAA	31	TCH1516intergenic_2504696-2505099~~~NCTC8325intergenic_2451645-2452048
1	n194697	2002	567	589	1435	1441	0	0	No	NA	NA	NA	NA	CGGTTCGCCTGCGCTTTAGCGCATGCATAAAA	32	TCH1516intergenic_2504696-2505099~~~NCTC8325intergenic_2451645-2452048
1	n194797	1439	8	589	1431	1441	0	0	Yes	9.24197e-09	8.49443e-07	0.136199	-6.48765	TTATTAAAACTCAGTTATTAGGGAGTGGGACA	32	NCTC8325intergenic_977455-978260~~~TCH1516intergenic_1071528-1072182
1	n194852	1438	8	589	1430	1441	0	0	Yes	6.20161e-08	5.31651e-06	0.120971	-6.03623	TCCCACTCCCTAATAACTGAGTTTTAATAAA	31	NCTC8325intergenic_977455-978260~~~TCH1516intergenic_1071528-1072182
1	n194933	1752	330	589	1422	1441	0	0	No	0.724389	0.999878	-0.00423639	0.352466	TTTTTTGTAAAAAGAAAACCATACGCTATGC	31	TCH1516intergenic_1456886-1457129
1	n195091	2	2	589	0	1441	0	0	No	NA	NA	NA	NA	CTGGGACATAAATCCCTAAAAAAACAGCAGCTCAACGAGCTGTAAATTAT	50
1	n195887	1	1	589	0	1441	0	0	No	NA	NA	NA	NA	AAAACAGCAGCTCAACGAGCTGTAAATTATAAAATACATATCAAAAAAGCTGATT	55	NCTC8325intergenic_1705641-1707965~~~NCTC8325intergenic_2425060-2426130~~~NCTC8325intergenic_2263981-2266096~~~NCTC8325intergenic_1348844-1349855~~~NCTC8325intergenic_1332346-1333317~~~NCTC8325intergenic_1813408-1815491~~~USA300HOU_RS15505;DBGWAS_general_tag=IS5/IS1182_family_transposase~~~USA300HOU_RS15370;DBGWAS_general_tag=IS5/IS1182_family_transposase~~~USA300HOU_RS15350;DBGWAS_general_tag=IS…
1	n195888	2028	587	589	1441	1441	0	0	No	NA	NA	NA	NA	AAAACAGCAGCTCAACGAGCTGTAAATTATCAAATA	36	USA300HOU_RS15465;DBGWAS_general_tag=transposase~~~NCTC8325intergenic_2079444-2079815
1	n199419	13	0	589	13	1441	0	0	No	NA	NA	NA	NA	TTTTTTAGGGATTTATGTCCCAACCTCTTTCTTACGATTAGTCAAGTACTTAT	53	TCH1516intergenic_>1443364-1443779~~~NCTC8325intergenic_1348844-1349855~~~TCH1516intergenic_79391-79650
1	n199425	3	3	589	0	1441	0	0	No	NA	NA	NA	NA	TAGAGGGTTTCAGCTAGGAACCTCTGATATGATAAAGTCCGTATAATTGTGTAAA	55	TCH1516intergenic_785756-786106~~~NCTC8325intergenic_704934-705284
1	n203839	3	2	589	1	1441	0	0	No	NA	NA	NA	NA	TAGTTATAATACTAGACTAAAGATATATATATTCATTTTCTTTTACATGTAAAAC	55	TCH1516intergenic_756512-756724~~~NCTC8325intergenic_675684-675902
1	n205232	5	5	589	0	1441	0	0	No	NA	NA	NA	NA	TTGCCTAAGAACTTAATGTCCCAGCCTCTTATTTTGCTGTTGATTATCTATCACCCTT	58	TCH1516intergenic_2551420-2551507~~~NCTC8325intergenic_2498373-2498460~~~USA300HOU_RS06005;DBGWAS_general_tag=hypothetical_protein~~~NCTC8325intergenic_1110970-1111793
1	n206767	2004	575	589	1429	1441	0	0	No	NA	NA	NA	NA	TAAATATGAATACAAAAATGGCTGGGACATAAATCCCTAAAAAA	44	TCH1516intergenic_1426269-1426808~~~NCTC8325intergenic_1332346-1333317
1	n207661	1974	549	589	1425	1441	0	0	No	NA	NA	NA	NA	AAAATGGCTGGGACATAAATCCCTAAAAAAA	31
1	n207954	35	28	589	7	1441	0	0	No	NA	NA	NA	NA	AAAAGGGAGTGGGACAGAAATAATATTTTCT	31	NCTC8325intergenic_1375090-1375154
1	n208607	1	1	589	0	1441	0	0	No	NA	NA	NA	NA	TTGATTTAAATCAGTACTATTATAAAAATACTTTTTACTTTTACACAATTATACGGACTT	60	USA300HOU_RS09430;DBGWAS_general_tag=hypothetical_protein~~~SAOUHSC_01896;DBGWAS_general_tag=hypothetical_protein
1	n209430	3	3	589	0	1441	0	0	No	NA	NA	NA	NA	AAATGGCTGGGACATAAATCCCTAAAAAAAACAG	34
1	n209431	1971	546	589	1425	1441	0	0	No	NA	NA	NA	NA	AAATGGCTGGGACATAAATCCCTAAAAAAACAGC	34
1	n209613	1	1	589	0	1441	0	0	No	NA	NA	NA	NA	AGCGAGTTGAAAGAGAATACGTTACAAAAGAGGCTGGGACATTAAGTTCTTAGGC	55	TCH1516intergenic_2672042-2672421~~~NCTC8325intergenic_2620534-2620913
1	n209841	75	67	589	8	1441	0	0	No	NA	NA	NA	NA	GATAAAGTCCGTATAATTGTGTAAAAGTAAAAAG	34
1	n210017	46	38	589	8	1441	0	0	No	NA	NA	NA	NA	AAAGGGAGTGGGACAGAAATAATATTTTCTC	31	NCTC8325intergenic_1375090-1375154
1	n210844	17	15	589	2	1441	0	0	No	NA	NA	NA	NA	AACGATAAAGTCCGTATAATTGTGTAAAAGT	31
1	n211195	1	1	589	0	1441	0	0	No	NA	NA	NA	NA	ATGAATATATACATCTTTAGTCTAGTATTACAACTATAACTAGCATGTCTTTAAATGAATA	61	TCH1516intergenic_756512-756724~~~NCTC8325intergenic_675684-675902
1	n211196	1953	565	589	1388	1441	0	0	No	NA	NA	NA	NA	TGAATATATACATCTTTAGTCTAGTATTATAACT	34	TCH1516intergenic_756512-756724~~~NCTC8325intergenic_675684-675902
1	n211288	4	4	589	0	1441	0	0	No	NA	NA	NA	NA	AATATGATAAAGTCCGTATAATTGTGTAAAA	31
1	n211687	10	10	589	0	1441	0	0	No	NA	NA	NA	NA	TTTACACAATTATACGGACTTTATCATATATATGCAATTTTGCATCATAAATATT	55	USA300HOU_RS12000;DBGWAS_general_tag=hypothetical_protein~~~SAOUHSC_02476;DBGWAS_general_tag=hypothetical_protein
1	n212764	75	67	589	8	1441	0	0	No	NA	NA	NA	NA	AAGTCCGTATAATTGTGTAAAAGTAAAAAGG	31
1	n212783	1	0	589	1	1441	0	0	No	NA	NA	NA	NA	GCATATTCATTTAAAGACATGCAAGTTATAATACTAGACTAAAGATGTATATA	53	TCH1516intergenic_756512-756724~~~NCTC8325intergenic_675684-675902
1	n212785	1	1	589	0	1441	0	0	No	NA	NA	NA	NA	GCATATTCATTTAAAGACATGCAAGTTATAGTTATAATACTAGACTAAAGATG	53	NCTC8325intergenic_675684-675902
1	n213057	1	1	589	0	1441	0	0	No	NA	NA	NA	NA	TTTACACAATTATACGGACTTTATCGGTGAAAGTTTGGAAATATTTGAAACAATT	55	NCTC8325intergenic_620764-621142
1	n213259	558	558	589	0	1441	0	0	Yes	1.85606e-50	5.25565e-48	-0.421866	-17.9907	ATATACATCTTTAGTCTAGTATTATAACTATAACT	35	TCH1516intergenic_756512-756724~~~NCTC8325intergenic_675684-675902
1	n213811	11	11	589	0	1441	0	0	No	NA	NA	NA	NA	ACCGATAAAGTCCGTATAATTGTGTAAAAGT	31
1	n214120	22	21	589	1	1441	0	0	No	NA	NA	NA	NA	ACTTTTACACAATTATACGGACTTTATCATA	31
1	n214128	15	13	589	2	1441	0	0	No	NA	NA	NA	NA	ACTTTTACACAATTATACGGACTTTATCCAT	31
1	n214147	39	36	589	3	1441	0	0	No	NA	NA	NA	NA	ACTTTTACACAATTATACGGACTTTATCGAA	31
1	n214148	20	20	589	0	1441	0	0	No	NA	NA	NA	NA	ACTTTTACACAATTATACGGACTTTATCGAT	31
1	n214149	10	10	589	0	1441	0	0	No	NA	NA	NA	NA	ACTTTTACACAATTATACGGACTTTATCGAG	31
1	n214150	19	19	589	0	1441	0	0	No	NA	NA	NA	NA	ACTTTTACACAATTATACGGACTTTATCGCA	31
1	n214151	11	11	589	0	1441	0	0	No	NA	NA	NA	NA	ACTTTTACACAATTATACGGACTTTATCGTA	31
1	n214152	2	2	589	0	1441	0	0	No	NA	NA	NA	NA	ACTTTTACACAATTATACGGACTTTATCGTC	31
1	n214153	2	2	589	0	1441	0	0	No	NA	NA	NA	NA	ACTTTTACACAATTATACGGACTTTATCGTG	31
1	n214257	2028	588	589	1440	1441	0	0	No	NA	NA	NA	NA	CTACTGCCTTTTGTAACGTATTCTCTTTCAACTCGCT	37	TCH1516intergenic_2672042-2672421~~~NCTC8325intergenic_2620534-2620913
1	n214328	19	17	589	2	1441	0	0	No	NA	NA	NA	NA	ACGATAAAGTCCGTATAATTGTGTAAAAGTA	31
1	n214581	1952	565	589	1387	1441	0	0	No	NA	NA	NA	NA	ATAATACTAGACTAAAGATGTATATATTCAT	31	TCH1516intergenic_756512-756724~~~NCTC8325intergenic_675684-675902
1	n214644	1394	7	589	1387	1441	0	0	Yes	1.90175e-06	0.000134286	0.0603679	-4.861	ATATACATCTTTAGTCTAGTATTATAACTAGCATGT	36	TCH1516intergenic_756512-756724~~~NCTC8325intergenic_675684-675902
1	n214708	2	2	589	0	1441	0	0	No	NA	NA	NA	NA	ATATATATCTTTAGTCTAGTATTATAACTATAACTA	36	NCTC8325intergenic_675684-675902
1	n214709	1	0	589	1	1441	0	0	No	NA	NA	NA	NA	ATATATATCTTTAGTCTAGTATTATAACTAGCATGT	36	TCH1516intergenic_756512-756724
1	n214912	17	16	589	1	1441	0	0	No	NA	NA	NA	NA	ATATGATAAAGTCCGTATAATTGTGTAAAAG	31
1	n214956	8	7	589	1	1441	0	0	No	NA	NA	NA	NA	AATATGGATAAAGTCCGTATAATTGTGTAAAA	32
1	n215230	559	559	589	0	1441	0	0	Yes	3.72572e-64	1.17352e-61	-0.506611	-20.2403	ATCTTTAGTCTAGTATTATAACTATAACTAGCATGTCTTT	40	NCTC8325intergenic_675684-675902
1	n215390	2	2	589	0	1441	0	0	No	NA	NA	NA	NA	TTATTATGGATAAAGTCCGTATAATTGTGTAAAA	34
1	n215756	29	27	589	2	1441	0	0	No	NA	NA	NA	NA	ATGATAAAGTCCGTATAATTGTGTAAAAGTA	31
1	n215946	68	63	589	5	1441	0	0	No	NA	NA	NA	NA	AGATAAAGTCCGTATAATTGTGTAAAAGTAA	31
1	n216305	2	2	589	0	1441	0	0	No	NA	NA	NA	NA	TCACCGATAAAGTCCGTATAATTGTGTAAAAG	32
1	n216344	557	557	589	0	1441	0	0	Yes	2.10283e-45	5.3107e-43	-0.382754	-16.5633	CATCTTTAGTCTAGTATTATAACTATAACTA	31	NCTC8325intergenic_675684-675902
1	n216503	11	11	589	0	1441	0	0	No	NA	NA	NA	NA	CCGATAAAGTCCGTATAATTGTGTAAAAGTA	31
1	n216627	8	8	589	0	1441	0	0	No	NA	NA	NA	NA	CTTTTACACAATTATACGGACTTTATCATAA	31
1	n216636	10	9	589	1	1441	0	0	No	NA	NA	NA	NA	CTTTTACACAATTATACGGACTTTATCCATA	31
1	n216734	48	45	589	3	1441	0	0	No	NA	NA	NA	NA	CGATAAAGTCCGTATAATTGTGTAAAAGTAA	31
1	n216884	44	41	589	3	1441	0	0	No	NA	NA	NA	NA	TACTTTTACACAATTATACGGACTTTATCGA	31
1	n216885	20	20	589	0	1441	0	0	No	NA	NA	NA	NA	TACTTTTACACAATTATACGGACTTTATCGC	31
1	n216889	1952	565	589	1387	1441	0	0	No	NA	NA	NA	NA	TATATACATCTTTAGTCTAGTATTATAACTA	31	TCH1516intergenic_756512-756724~~~NCTC8325intergenic_675684-675902
1	n216892	11	10	589	1	1441	0	0	No	NA	NA	NA	NA	TATATGATAAAGTCCGTATAATTGTGTAAAA	31
1	n216985	64	60	589	4	1441	0	0	No	NA	NA	NA	NA	TTACTTTTACACAATTATACGGACTTTATCA	31
1	n216986	52	48	589	4	1441	0	0	No	NA	NA	NA	NA	TTACTTTTACACAATTATACGGACTTTATCC	31
1	n216990	2	1	589	1	1441	0	0	No	NA	NA	NA	NA	TTATATGATAAAGTCCGTATAATTGTGTAAA	31
1	n217045	6	6	589	0	1441	0	0	No	NA	NA	NA	NA	TTTTACACAATTATACGGACTTTATCATATC	31
1	n217658	1	1	589	0	1441	0	0	No	NA	NA	NA	NA	TTAAAAATGTAAATAAAAATTATATAAATTGCCCACATCTTTTTAAAAGGTGTGGGCTTTA	61	TCH1516intergenic_2825185-2826032~~~NCTC8325intergenic_2773601-2774449
1	n219752	2028	587	589	1441	1441	0	0	No	NA	NA	NA	NA	TACAGGAAATCCGCATAAATTAGATGAAATGGAAAGTAATA	41	TCH1516intergenic_2825185-2826032~~~NCTC8325intergenic_2773601-2774449
1	n222442	2029	588	589	1441	1441	0	0	No	NA	NA	NA	NA	TCATCTAATTACAGGAAATCCGCATAAATTAGATGAAAT	39	TCH1516intergenic_2825185-2826032~~~NCTC8325intergenic_2773601-2774449
1	n222637	2029	589	589	1440	1441	0	0	No	NA	NA	NA	NA	AATTTATATAATTTTTATTTACATTTTTAACTT	33	TCH1516intergenic_2825185-2826032~~~NCTC8325intergenic_2773601-2774449
1	n224912	1	1	589	0	1441	0	0	No	NA	NA	NA	NA	TTACGCAAGGTATTGAATTACCGAGTACGGACACGCTCGGTGTTGTAAAGAGCAAATAATC	61	TCH1516intergenic_2825185-2826032~~~NCTC8325intergenic_2773601-2774449
1	n224913	1977	536	589	1441	1441	0	0	No	NA	NA	NA	NA	TTACGCAAGGTATTGAATTACCGAGTACGGGCACGCTCGGTGTTG	45	TCH1516intergenic_2825185-2826032~~~NCTC8325intergenic_2773601-2774449
1	n225909	1	1	589	0	1441	0	0	No	NA	NA	NA	NA	CATCACATAGGCGCTTATCAATAAATTATTGCTTATTACTTTCCATTTCATCTAATTTATG	61	TCH1516intergenic_2825185-2826032~~~NCTC8325intergenic_2773601-2774449
1	n226842	2029	589	589	1440	1441	0	0	No	NA	NA	NA	NA	TTCAGTCAACTACTGCCAATATAACTTCGTAGA	33	NCTC8325intergenic_2815019-2815472~~~TCH1516intergenic_2580365-2580589~~~TCH1516intergenic_891806-892323~~~NCTC8325intergenic_2527319-2527926~~~NCTC8325intergenic_811453-811871~~~TCH1516intergenic_1380186-1380547~~~NCTC8325intergenic_1286269-1287160~~~TCH1516intergenic_2031793-2032023~~~NCTC8325intergenic_1978212-1978642~~~USA300HOU_RS15635;DBGWAS_general_tag=hypothetical_protein
1	n233831	14	14	589	0	1441	0	0	No	NA	NA	NA	NA	ACAGGCTGGGACATAAATCCCTAAAAAAAACAG	33
1	n233832	1945	522	589	1423	1441	0	0	No	NA	NA	NA	NA	AACAGGCTGGGACATAAATCCCTAAAAAAACAG	33
1	n234221	1	0	589	1	1441	0	0	No	NA	NA	NA	NA	GGGCCCCTGACTAGAATTGAAAAAAGCTTACTACAAGCGCATTTTCGTTCAGTCAATTACT	61	NCTC8325intergenic_115214-116537~~~NCTC8325intergenic_1375286-1375630~~~NCTC8325intergenic_811453-811871~~~NCTC8325intergenic_1286269-1287160~~~NCTC8325intergenic_1978212-1978642
1	n234582	1	1	589	0	1441	0	0	No	NA	NA	NA	NA	CGAAATAAATTTTACGAAAATATCATTTCTTTCCCACTCCCTAAT	45	NCTC8325intergenic_977455-978260
1	n234583	1	0	589	1	1441	0	0	No	NA	NA	NA	NA	AATTTTACGAAAATATCATTTCTGTCCCACCTCACTC	37	NCTC8325intergenic_977455-978260~~~NCTC8325intergenic_775477-776118
1	n234586	2004	575	589	1429	1441	0	0	No	NA	NA	NA	NA	ACGAAAATATCATTTCTGTCCCACTCCCTAA	31	NCTC8325intergenic_977455-978260~~~NCTC8325intergenic_2815019-2815472~~~SAOUHSC_01687;DBGWAS_general_tag=hypothetical_protein
1	n235577	1	0	589	1	1441	0	0	No	NA	NA	NA	NA	TATTAGGGAGTGGGACAGAAATGATATTTTAGCAAAATTTATTTCGTCGTCCC	53	USA300HOU_RS15360;DBGWAS_general_tag=hypothetical_protein~~~NCTC8325intergenic_1776134-1776997~~~NCTC8325intergenic_977455-978260~~~NCTC8325intergenic_2815019-2815472~~~TCH1516intergenic_1728766-<1729037~~~NCTC8325intergenic_1631379-1632958
1	n235578	1	1	589	0	1441	0	0	No	NA	NA	NA	NA	ATTAGGGAGTGGGACAGAAATGATATTTTCACAA	34	NCTC8325intergenic_977455-978260~~~NCTC8325intergenic_2815019-2815472~~~NCTC8325intergenic_2501982-2502475
1	n235579	2029	588	589	1441	1441	0	0	No	NA	NA	NA	NA	ATTAGGGAGTGGGACAGAAATGATATTTTCG	31	NCTC8325intergenic_977455-978260~~~NCTC8325intergenic_2815019-2815472~~~SAOUHSC_01687;DBGWAS_general_tag=hypothetical_protein
1	n235744	2004	576	589	1428	1441	0	0	No	NA	NA	NA	NA	ATTTTACGAAAATATCATTTCTGTCCCACTCC	32	NCTC8325intergenic_977455-978260
1	n235832	1	1	589	0	1441	0	0	No	NA	NA	NA	NA	TGCTGGGGTGGGACGACGAAATAAATTTTGGGAAAATATCATTTCTGTCCCACTCCGTAAT	61	NCTC8325intergenic_2815019-2815472~~~USA300HOU_RS15635;DBGWAS_general_tag=hypothetical_protein
1	n236409	2003	575	589	1428	1441	0	0	No	NA	NA	NA	NA	TAGGGAGTGGGACAGAAATGATATTTTCGTAA	32	NCTC8325intergenic_977455-978260~~~NCTC8325intergenic_2815019-2815472~~~SAOUHSC_01687;DBGWAS_general_tag=hypothetical_protein
1	n236929	1	1	589	0	1441	0	0	No	NA	NA	NA	NA	ATTACGGAGTGGGACAGAAATGATATTTTCGTAAA	35	NCTC8325intergenic_977455-978260
1	n237012	2004	575	589	1429	1441	0	0	No	NA	NA	NA	NA	TATTAGGGAGTGGGACAGAAATGATATTTTC	31	NCTC8325intergenic_977455-978260~~~NCTC8325intergenic_2815019-2815472
1	n237092	2	1	589	1	1441	0	0	No	NA	NA	NA	NA	TTACGAAAATATCATTTCTGTCCCACTCCCA	31	NCTC8325intergenic_977455-978260~~~NCTC8325intergenic_1286269-1287160~~~USA300HOU_RS15215;DBGWAS_general_tag=hypothetical_protein~~~NCTC8325intergenic_2778589-2779035~~~SAOUHSC_00896;DBGWAS_general_tag=hypothetical_protein
1	n237105	2023	584	589	1439	1441	0	0	No	NA	NA	NA	NA	TTAGGGAGTGGGACAGAAATGATATTTTCGC	31	NCTC8325intergenic_977455-978260~~~NCTC8325intergenic_720044-720394~~~NCTC8325intergenic_2815019-2815472~~~NCTC8325intergenic_115214-116537~~~NCTC8325intergenic_1286269-1287160~~~SAOUHSC_01687;DBGWAS_general_tag=hypothetical_protein~~~USA300HOU_RS15215;DBGWAS_general_tag=hypothetical_protein~~~NCTC8325intergenic_2778589-2779035~~~SAOUHSC_00896;DBGWAS_general_tag=hypothetical_protein~~~USA300HOU_R…
1	n237119	2003	575	589	1428	1441	0	0	No	NA	NA	NA	NA	TTTACGAAAATATCATTTCTGTCCCACTCCC	31	NCTC8325intergenic_977455-978260
1	n237142	2027	586	589	1441	1441	0	0	No	NA	NA	NA	NA	TTTTGTGAAAATATCATTTCTGTCCCACTCCC	32	NCTC8325intergenic_2501982-2502475
1	n238232	1	1	589	0	1441	0	0	No	NA	NA	NA	NA	GAAAATATCATTTCTGTCCCACTCCGTAATTTGG	34
1	n241479	2030	589	589	1441	1441	0	0	No	NA	NA	NA	NA	AATAATTTATTGATAAGCGCCTATGTGATGGTAAATCAT	39	TCH1516intergenic_2825185-2826032~~~NCTC8325intergenic_2773601-2774449
1	n244964	2029	588	589	1441	1441	0	0	No	NA	NA	NA	NA	CATCACATAGGCGCTTATCAATAAATTATTACTTATTACTTTC	43	TCH1516intergenic_2825185-2826032~~~NCTC8325intergenic_2773601-2774449
1	n245354	29	0	589	29	1441	0	0	No	NA	NA	NA	NA	TTTTTATTTACATTTTTAACTTATAAAAAAGCGCCTATGTCATGATTTACCATC	54	TCH1516intergenic_2825185-2826032~~~NCTC8325intergenic_2773601-2774449
1	n253760	2008	588	589	1420	1441	0	0	No	NA	NA	NA	NA	AAATATTGTAGTTTTACATGTAAAAGAAAATGAATATATA	40	TCH1516intergenic_756512-756724~~~NCTC8325intergenic_675684-675902
1	n254266	1	1	589	0	1441	0	0	No	NA	NA	NA	NA	GCTTGTAATAAGCTTTTTTCAATTCTAGTCGACCTTGCTGGGGTGGGACGACGAAATAAAT	61	NCTC8325intergenic_2815019-2815472~~~NCTC8325intergenic_115214-116537~~~USA300HOU_RS15635;DBGWAS_general_tag=hypothetical_protein
1	n255368	2029	588	589	1441	1441	0	0	No	NA	NA	NA	NA	CTTATTACTTTCCATTTCATCTAATTTATGCG	32	TCH1516intergenic_2825185-2826032~~~NCTC8325intergenic_2773601-2774449
1	n260468	5	0	589	5	1441	0	0	No	NA	NA	NA	NA	CTTTTATAATTTTACTTAATAATAAAAAAGAGTCCGGGAC	40
1	n276204	2011	571	589	1440	1441	0	0	No	NA	NA	NA	NA	ATTAATAATGTACAAAAAATATAAATCAAATCGACAT	37	USA300HOU_RS00785;DBGWAS_general_tag=hypothetical_protein~~~SAOUHSC_00111;DBGWAS_general_tag=hypothetical_protein
1	n278742	2011	571	589	1440	1441	0	0	No	NA	NA	NA	NA	TGATATTAATAATGTACAAAAAATATAAATCAAA	34	USA300HOU_RS00785;DBGWAS_general_tag=hypothetical_protein~~~SAOUHSC_00111;DBGWAS_general_tag=hypothetical_protein
1	n281277	2009	588	589	1421	1441	0	0	No	NA	NA	NA	NA	AAAATATTGTAGTTTTACATGTAAAAGAAAA	31	TCH1516intergenic_756512-756724~~~NCTC8325intergenic_675684-675902
1	n282181	4	4	589	0	1441	0	0	No	NA	NA	NA	NA	TTTTATTTCGCAAATATATGTCATTATAGAGGCTGGGACATTAAGTTCTTAGGCAAT	57	NCTC8325intergenic_2425060-2426130~~~NCTC8325intergenic_1332346-1333317~~~USA300HOU_RS06005;DBGWAS_general_tag=hypothetical_protein~~~NCTC8325intergenic_1110970-1111793~~~TCH1516intergenic_2215890-2216093~~~NCTC8325intergenic_2162467-2162621
1	n287661	2010	588	589	1422	1441	0	0	No	NA	NA	NA	NA	AGCTCAATAAAATATTGTAGTTTTACATGTAAAAGAAA	38	TCH1516intergenic_756512-756724~~~NCTC8325intergenic_675684-675902
1	n288522	1963	539	589	1424	1441	0	0	No	NA	NA	NA	NA	AAAACAGGCTGGGACATAAATCCCTAAAAAA	31	TCH1516intergenic_2317347-2317802~~~NCTC8325intergenic_2263981-2266096
1	n289205	1962	539	589	1423	1441	0	0	No	NA	NA	NA	NA	AAACAGGCTGGGACATAAATCCCTAAAAAAA	31
1	n289566	3	0	589	3	1441	0	0	No	NA	NA	NA	NA	TTTATTTAAATATCAAAATTACCATATCATCATGATAGCATATTCATTTAAAGACATG	58	TCH1516intergenic_756512-756724~~~NCTC8325intergenic_675684-675902
1	n289567	37	10	589	27	1441	0	0	No	NA	NA	NA	NA	TTTATTTAAATATCAAAATTACCATATCATTATAGCATATTCATTTAAAGACATGCTAGTT	61	TCH1516intergenic_756512-756724~~~NCTC8325intergenic_675684-675902
1	n289568	1	0	589	1	1441	0	0	No	NA	NA	NA	NA	TTTAAATATCAAAATTACCATATCATGATAACATATTCATTTAAAGACATGCTAGTTATAA	61	TCH1516intergenic_756512-756724~~~NCTC8325intergenic_675684-675902
1	n289569	1986	577	589	1409	1441	0	0	No	NA	NA	NA	NA	TTTAAATATCAAAATTACCATATCATGATAGCATATTCA	39	TCH1516intergenic_756512-756724~~~NCTC8325intergenic_675684-675902
1	n290651	17	17	589	0	1441	0	0	No	NA	NA	NA	NA	AACAGGCTGGGACATAAATCCCTAAAAAAAA	31
1	n291537	2027	587	589	1440	1441	0	0	No	NA	NA	NA	NA	CAATTTAATTTATTTAAATATCAAAATTACCATATCAT	38	TCH1516intergenic_756512-756724~~~NCTC8325intergenic_675684-675902
1	n292472	1914	546	589	1368	1441	0	0	No	NA	NA	NA	NA	ACATTGATTTATGTCCCAGCCTGTTTTCATAAGCCACAGCTAATG	45	TCH1516intergenic_891806-892323~~~NCTC8325intergenic_811453-811871
1	n293596	1987	577	589	1410	1441	0	0	No	NA	NA	NA	NA	TATCATGATATGGTAATTTTGATATTTAAATAAA	34	TCH1516intergenic_756512-756724~~~NCTC8325intergenic_675684-675902
1	n294308	2000	564	589	1436	1441	0	0	No	NA	NA	NA	NA	AGTAATTGACTGAACGAAAATGCGCTTGTAA	31	NCTC8325intergenic_115214-116537
1	n294719	1629	189	589	1440	1441	0	0	No	0.56944	0.999878	-0.0149151	0.568655	CTTCGTAGATCATAGAAGATTGATTTATTTC	31	USA300HOU_RS00785;DBGWAS_general_tag=hypothetical_protein
1	n295765	1	1	589	0	1441	0	0	No	NA	NA	NA	NA	ATAAATACAATAAATGCGGTTTAAAATATGGATAAAGTCCGTATAATTGTGTA	53	USA300HOU_RS03315;DBGWAS_general_tag=cell_division_protein_FtsK
1	n295858	1	1	589	0	1441	0	0	No	NA	NA	NA	NA	ATGCTTATTAAAATTAGGGGTGGAAATATGGATAAAGTCCGTATAATTGTGTA	53	USA300HOU_RS00785;DBGWAS_general_tag=hypothetical_protein~~~SAOUHSC_00111;DBGWAS_general_tag=hypothetical_protein
1	n296591	1	1	589	0	1441	0	0	No	NA	NA	NA	NA	AAATATTATAAAAAGATATAAGAAAAAGAGGCTGGGACATAAATCCCTAAAA	52	SAOUHSC_00111;DBGWAS_general_tag=hypothetical_protein
1	n296615	2	2	589	0	1441	0	0	No	NA	NA	NA	NA	AAATATGGATAAAGTCCGTATAATTGTGTAA	31
1	n296953	6	5	589	1	1441	0	0	No	NA	NA	NA	NA	TATAACTAGCATGTCTTTAAATGAATATGGATAAAGTCCGTATAATTGTGTAA	53	TCH1516intergenic_756512-756724~~~NCTC8325intergenic_675684-675902
1	n297143	1395	7	589	1388	1441	0	0	Yes	1.2885e-06	9.30943e-05	0.0622728	-4.94467	TCATTTAAAGACATGCTAGTTATAATACTAGACTAAAGAT	40	TCH1516intergenic_756512-756724
1	n297656	580	580	589	0	1441	0	0	Yes	1.17072e-119	2.3442e-116	-0.86137	-50.9306	AACTATAACTAGCATGTCTTTAAATGAATATG	32	TCH1516intergenic_756512-756724~~~NCTC8325intergenic_675684-675902
1	n297657	1	1	589	0	1441	0	0	No	NA	NA	NA	NA	AGTATTATAACTATAACTAGCATGTCTTTATATGAATATGCTATCATGATATGGTAATTT	60	TCH1516intergenic_756512-756724~~~NCTC8325intergenic_675684-675902
1	n297669	1980	569	589	1411	1441	0	0	No	NA	NA	NA	NA	AACTAGCATGTCTTTAAATGAATATGCTATCATGA	35	TCH1516intergenic_756512-756724~~~NCTC8325intergenic_675684-675902
1	n300091	579	579	589	0	1441	0	0	Yes	5.4055e-87	2.48414e-84	-0.706837	-31.4861	AGTATTATAACTATAACTAGCATGTCTTTAAATGAATA	38	NCTC8325intergenic_675684-675902
1	n300092	2017	579	589	1438	1441	0	0	No	NA	NA	NA	NA	TATAACTAGCATGTCTTTAAATGAATATGCTAT	33	TCH1516intergenic_756512-756724~~~NCTC8325intergenic_675684-675902
1	n300230	1447	7	589	1440	1441	0	0	Yes	6.24773e-165	1.59263e-161	0.988419	-197.598	CATATTCATTTAAAGACATGCTAGTTATAATACTA	35	TCH1516intergenic_756512-756724~~~NCTC8325intergenic_675684-675902
1	n301413	1	0	589	1	1441	0	0	No	NA	NA	NA	NA	CCATATTCATTTAAAGACATGCTAGTTATAA	31	TCH1516intergenic_756512-756724~~~NCTC8325intergenic_675684-675902
1	n301414	5	5	589	0	1441	0	0	No	NA	NA	NA	NA	CCATATTCATTTAAAGACATGCTAGTTATAG	31	TCH1516intergenic_756512-756724~~~NCTC8325intergenic_675684-675902
1	n301494	572	572	589	0	1441	0	0	Yes	5.9697e-47	1.564e-44	-0.395128	-16.3726	CTATAACTAGCATGTCTTTAAATGAATATGC	31	TCH1516intergenic_756512-756724~~~NCTC8325intergenic_675684-675902
1	n301682	580	580	589	0	1441	0	0	Yes	9.80145e-116	1.61626e-112	-0.897762	-58.5723	TAAAGACATGCTAGTTATAGTTATAATACTA	31	NCTC8325intergenic_675684-675902
1	n301800	1445	7	589	1438	1441	0	0	Yes	4.40937e-81	1.93137e-78	0.730656	-37.4846	TTATAACTAGCATGTCTTTAAATGAATATGC	31	TCH1516intergenic_756512-756724~~~NCTC8325intergenic_675684-675902
1	n303182	2007	579	589	1428	1441	0	0	No	NA	NA	NA	NA	CGAAATAAATTTTACGAAAATATCATTTCTGTC	33	NCTC8325intergenic_977455-978260
1	n303562	2005	577	589	1428	1441	0	0	No	NA	NA	NA	NA	ATAAATTTTACGAAAATATCATTTCTGTCCCAC	33	NCTC8325intergenic_977455-978260
1	n304580	2006	578	589	1428	1441	0	0	No	NA	NA	NA	NA	AATAAATTTTACGAAAATATCATTTCTGTCC	31	NCTC8325intergenic_977455-978260
1	n305125	2005	577	589	1428	1441	0	0	No	NA	NA	NA	NA	AATTTTACGAAAATATCATTTCTGTCCCACT	31	NCTC8325intergenic_977455-978260
1	n308809	1	1	589	0	1441	0	0	No	NA	NA	NA	NA	CATTTTTAACTTATAAAAAAAGCGCCTATGCCATGATTTACCATCACATAGGCGCTTATCA	61	TCH1516intergenic_2825185-2826032~~~NCTC8325intergenic_2773601-2774449
1	n313249	2028	587	589	1441	1441	0	0	No	NA	NA	NA	NA	AGTACGGGCACGCTCGGTGTTGTAAAGAGCAAATAATC	38	TCH1516intergenic_2825185-2826032~~~NCTC8325intergenic_2773601-2774449
1	n314076	6	6	589	0	1441	0	0	No	NA	NA	NA	NA	ATTGCCTAAGAACTTAATGTCCCAGCCTCTCTTATGCATGCGCTTAGCGCAGGCGC	56	NCTC8325intergenic_2425060-2426130~~~NCTC8325intergenic_1332346-1333317~~~TCH1516intergenic_2265137-2265636~~~USA300HOU_RS06005;DBGWAS_general_tag=hypothetical_protein~~~NCTC8325intergenic_1110970-1111793
1	n314936	1988	552	589	1436	1441	0	0	No	NA	NA	NA	NA	TGACTAGAATTGAAAAAAGCTTATTACAAGC	31	NCTC8325intergenic_115214-116537
1	n318212	2010	585	589	1425	1441	0	0	No	NA	NA	NA	NA	GAAGATGATTTTTTTAGGAAGTATATTACAGTACTAC	37
1	n319158	1956	547	589	1409	1441	0	0	No	NA	NA	NA	NA	ACTGCTGTTTTTTTAGGGATTTATGTCCCAACCT	34
1	n319160	2016	575	589	1441	1441	0	0	No	NA	NA	NA	NA	ACTGCTGTTTTTTTAGGGATTTATGTCCCAG	31
1	n320072	4	4	589	0	1441	0	0	No	NA	NA	NA	NA	AAAATAAATAAACTAAAGAGTCTGGGACATAAATCCCTAAAAAAACAGCAG	51	TCH1516intergenic_2478113-2478687~~~NCTC8325intergenic_2425060-2426130
1	n320558	2014	573	589	1441	1441	0	0	No	NA	NA	NA	NA	CTGCTGTTTTTTTAGGGATTTATGTCCCAGCC	32
1	n320559	17	17	589	0	1441	0	0	No	NA	NA	NA	NA	CTGCTGTTTTTTTTAGGGATTTATGTCCCAGCC	33
1	n321595	2015	584	589	1431	1441	0	0	No	NA	NA	NA	NA	AAAATTTATTTCGTCGTCCCACCCCAGCAAGGT	33	NCTC8325intergenic_2815019-2815472~~~USA300HOU_RS15635;DBGWAS_general_tag=hypothetical_protein
1	n322482	2029	588	589	1441	1441	0	0	No	NA	NA	NA	NA	GGTTCAAATGAAAGTATATCCAGCTCAAATTAGGGAGT	38	NCTC8325intergenic_2815019-2815472~~~TCH1516intergenic_2866601-2866788
1	n322509	2008	580	589	1428	1441	0	0	No	NA	NA	NA	NA	AGAAATGATATTTTCGTAAAATTTATTTCGTCGTCC	36	USA300HOU_RS15240;DBGWAS_general_tag=hypothetical_protein~~~NCTC8325intergenic_977455-978260
1	n323547	2026	588	589	1438	1441	0	0	No	NA	NA	NA	NA	AATCATATTTTAGCAAAATTTATTTCGTCGTCCC	34	USA300HOU_RS15360;DBGWAS_general_tag=hypothetical_protein~~~NCTC8325intergenic_1776134-1776997
1	n324299	1	1	589	0	1441	0	0	No	NA	NA	NA	NA	TCACAAAATTTATTTCGTCGTCCCACCCCAGCA	33	NCTC8325intergenic_2815019-2815472~~~USA300HOU_RS15635;DBGWAS_general_tag=hypothetical_protein~~~NCTC8325intergenic_2501982-2502475~~~USA300HOU_RS15550;DBGWAS_general_tag=hypothetical_protein~~~TCH1516intergenic_2725574-2725627~~~NCTC8325intergenic_2673776-2674109
1	n325217	2024	586	589	1438	1441	0	0	No	NA	NA	NA	NA	ATATTTTAGCAAAATTTATTTCGTCGTCCCAC	32	USA300HOU_RS15360;DBGWAS_general_tag=hypothetical_protein~~~NCTC8325intergenic_1776134-1776997
1	n325219	2027	587	589	1440	1441	0	0	No	NA	NA	NA	NA	ATATTTTCACAAAATTTATTTCGTCGTCCCACCCCA	36	NCTC8325intergenic_2501982-2502475~~~USA300HOU_RS15550;DBGWAS_general_tag=hypothetical_protein~~~TCH1516intergenic_2725574-2725627~~~NCTC8325intergenic_2673776-2674109
1	n325225	2006	578	589	1428	1441	0	0	No	NA	NA	NA	NA	ATATTTTCGTAAAATTTATTTCGTCGTCCCACCCC	35	USA300HOU_RS15240;DBGWAS_general_tag=hypothetical_protein~~~NCTC8325intergenic_977455-978260~~~NCTC8325intergenic_603627-604015~~~USA300HOU_RS15115;DBGWAS_general_tag=hypothetical_protein
1	n325226	1	0	589	1	1441	0	0	No	NA	NA	NA	NA	GATATTTTCGTAAAATTTATTTCGTCGTCCTACCCCA	37	USA300HOU_RS15240;DBGWAS_general_tag=hypothetical_protein~~~NCTC8325intergenic_977455-978260
1	n325598	2023	585	589	1438	1441	0	0	No	NA	NA	NA	NA	ATTTTAGCAAAATTTATTTCGTCGTCCCACC	31	USA300HOU_RS15360;DBGWAS_general_tag=hypothetical_protein~~~NCTC8325intergenic_1776134-1776997
1	n326004	2014	583	589	1431	1441	0	0	No	NA	NA	NA	NA	CAAAATTTATTTCGTCGTCCCACCCCAGCAA	31	NCTC8325intergenic_2815019-2815472~~~USA300HOU_RS15635;DBGWAS_general_tag=hypothetical_protein
1	n326292	1	1	589	0	1441	0	0	No	NA	NA	NA	NA	TTGCTGGGGTGGGACGACGAAATAAATTTTACGA	34	USA300HOU_RS15240;DBGWAS_general_tag=hypothetical_protein~~~NCTC8325intergenic_977455-978260~~~NCTC8325intergenic_603627-604015~~~NCTC8325intergenic_2815019-2815472~~~USA300HOU_RS15635;DBGWAS_general_tag=hypothetical_protein~~~USA300HOU_RS15115;DBGWAS_general_tag=hypothetical_protein
1	n326293	2013	582	589	1431	1441	0	0	No	NA	NA	NA	NA	TGCTGGGGTGGGACGACGAAATAAATTTTGCGA	33	NCTC8325intergenic_720044-720394~~~NCTC8325intergenic_2815019-2815472~~~NCTC8325intergenic_811453-811871~~~NCTC8325intergenic_1286269-1287160~~~USA300HOU_RS15635;DBGWAS_general_tag=hypothetical_protein~~~NCTC8325intergenic_775477-776118~~~SAOUHSC_01687;DBGWAS_general_tag=hypothetical_protein~~~USA300HOU_RS15215;DBGWAS_general_tag=hypothetical_protein~~~NCTC8325intergenic_2778589-2779035~~~SAOUHSC…
1	n326495	2030	589	589	1441	1441	0	0	No	NA	NA	NA	NA	TTCGCAAAATTTATTTCGTCGTCCCACCCCA	31	NCTC8325intergenic_720044-720394~~~NCTC8325intergenic_2815019-2815472~~~NCTC8325intergenic_811453-811871~~~NCTC8325intergenic_1286269-1287160~~~USA300HOU_RS15635;DBGWAS_general_tag=hypothetical_protein~~~NCTC8325intergenic_775477-776118~~~SAOUHSC_01687;DBGWAS_general_tag=hypothetical_protein~~~USA300HOU_RS15215;DBGWAS_general_tag=hypothetical_protein~~~NCTC8325intergenic_2778589-2779035~~~SAOUHSC…
1	n326591	2006	578	589	1428	1441	0	0	No	NA	NA	NA	NA	GATATTTTCGTAAAATTTATTTCGTCGTCCC	31	USA300HOU_RS15240;DBGWAS_general_tag=hypothetical_protein~~~NCTC8325intergenic_977455-978260
1	n326978	10	3	589	7	1441	0	0	No	NA	NA	NA	NA	AAAAAGGGAGTGGGACAGAAATAATATTTTC	31	NCTC8325intergenic_1375090-1375154
1	n327155	25	25	589	0	1441	0	0	No	NA	NA	NA	NA	GAAAATATTATTTCTGTCCCACTCCCTTTTAT	32	NCTC8325intergenic_1375090-1375154
1	n327156	8	1	589	7	1441	0	0	No	NA	NA	NA	NA	AAAATATTATTTCTGTCCCACTCCCTTTTTA	31
1	n327788	24	24	589	0	1441	0	0	No	NA	NA	NA	NA	AAATATTATTTCTGTCCCACTCCCTTTTATG	31
1	n328010	1	0	589	1	1441	0	0	No	NA	NA	NA	NA	TTTTTTTTAGGGATTAATGTCCCAGACTCTAAATTTTATTTATTTTCAATATAACAATTGTCTA	64	TCH1516intergenic_2478113-2478687~~~NCTC8325intergenic_2425060-2426130
1	n329301	1731	580	589	1151	1441	0	0	No	0.974587	0.999878	-0.000244542	0.0318676	AATTGTTATATTGAAAATAAATAAACTAAAGA	32	TCH1516intergenic_2478113-2478687~~~NCTC8325intergenic_2425060-2426130
1	n329809	2005	565	589	1440	1441	0	0	No	NA	NA	NA	NA	TGTACATTATTAATATCATTATTACCTTTGCTAAA	35	USA300HOU_RS00785;DBGWAS_general_tag=hypothetical_protein~~~SAOUHSC_00111;DBGWAS_general_tag=hypothetical_protein
1	n330631	2012	584	589	1428	1441	0	0	No	NA	NA	NA	NA	TAATCCTTGATTAGACAATTGTTATATTGAAAATAA	36	TCH1516intergenic_2478113-2478687~~~NCTC8325intergenic_2425060-2426130
1	n330755	2000	581	589	1419	1441	0	0	No	NA	NA	NA	NA	TTGATTAGACAATTGTTATATTGAAAATAAATAAA	35	TCH1516intergenic_2478113-2478687~~~NCTC8325intergenic_2425060-2426130
1	n331044	1997	581	589	1416	1441	0	0	No	NA	NA	NA	NA	TAGACAATTGTTATATTGAAAATAAATAAACT	32	TCH1516intergenic_2478113-2478687~~~NCTC8325intergenic_2425060-2426130
1	n334346	2027	588	589	1439	1441	0	0	No	NA	NA	NA	NA	TAATTTTTATTTACATTTTTAACTTATAAAAAA	33	TCH1516intergenic_2825185-2826032~~~NCTC8325intergenic_2773601-2774449
1	n335628	2028	589	589	1439	1441	0	0	No	NA	NA	NA	NA	TTATATAATTTTTATTTACATTTTTAACTTATAAA	35	TCH1516intergenic_2825185-2826032~~~NCTC8325intergenic_2773601-2774449
1	n336509	5	5	589	0	1441	0	0	No	NA	NA	NA	NA	CACCCGTTCACACGGGTGGTTTTGATTTATA	31	TCH1516intergenic_1917784-1917919~~~NCTC8325intergenic_1820726-1820861~~~TCH1516intergenic_1457615-1457745
1	n336982	492	492	589	0	1441	0	0	Yes	6.15697e-14	8.2583e-12	-0.145206	-7.6211	TTTTATTTACATTTTTAACTTATAAAAAAAAGCGCCTATGTCATGATTTACCAT	54
1	n336987	1998	588	589	1410	1441	0	0	No	NA	NA	NA	NA	TTTTTATTTACATTTTTAACTTATAAAAAAA	31
1	n340661	6	0	589	6	1441	0	0	No	NA	NA	NA	NA	TTTTTTTAGGGATTAATGTCCCAGACTCTTCTTACGATTAGTCAAGTACTTATAA	55
1	n340662	1727	577	589	1150	1441	0	0	No	0.982219	0.999878	-0.000170933	0.0223829	TCCCAGACTCTTTAGTTTATTTATTTTCAATATAACA	37	TCH1516intergenic_2478113-2478687~~~NCTC8325intergenic_2425060-2426130
1	n340946	1	0	589	1	1441	0	0	No	NA	NA	NA	NA	ATAAGTACTTGACTAATCGTAAGAAAGAGGCTGGGACATTAATCCCTAAAAAAAACAGCA	60	TCH1516intergenic_79391-79650
1	n340947	4	0	589	4	1441	0	0	No	NA	NA	NA	NA	TATAAGTACTTGACTAATCGTAAGAAGAGGCTGGGACATAAATCCCTAAAAAAC	54	TCH1516intergenic_2071731-2072077~~~NCTC8325intergenic_2018124-2018696~~~TCH1516intergenic_318637-318882~~~NCTC8325intergenic_264152-264824
1	n341306	12	0	589	12	1441	0	0	No	NA	NA	NA	NA	ATTATAAGTACTTGACTAATCGTAAGAAGAG	31	TCH1516intergenic_79391-79650
1	n341767	3	3	589	0	1441	0	0	No	NA	NA	NA	NA	TTTTTTAGGGATTTATGTCCCAGCCTCTTTAGTTTATTTATTTTCAATATAACA	54	TCH1516intergenic_2478113-2478687~~~NCTC8325intergenic_2425060-2426130~~~TCH1516intergenic_2071731-2072077~~~NCTC8325intergenic_2018124-2018696~~~TCH1516intergenic_318637-318882~~~NCTC8325intergenic_264152-264824
1	n342099	6	0	589	6	1441	0	0	No	NA	NA	NA	NA	CCTCTTCTTACGATTAGTCAAGTACTTATAA	31
1	n342100	14	0	589	14	1441	0	0	No	NA	NA	NA	NA	CCTCTTTCTTACGATTAGTCAAGTACTTATA	31	TCH1516intergenic_79391-79650
1	n342184	1730	580	589	1150	1441	0	0	No	0.960345	0.999878	-0.000381497	0.0497454	CTCTTTAGTTTATTTATTTTCAATATAACAA	31	TCH1516intergenic_2478113-2478687~~~NCTC8325intergenic_2425060-2426130
1	n342288	1810	482	589	1328	1441	0	0	No	0.743615	0.999878	0.00263277	-0.326993	CGAAGCGTAGTGACCTCAGGTTGTTAGGGGC	31	TCH1516intergenic_2504696-2505099~~~NCTC8325intergenic_2451645-2452048
1	n342444	2	1	589	1	1441	0	0	No	NA	NA	NA	NA	TCCCTAACAACCTGAGGTCACTACGCTTCCA	31	TCH1516intergenic_2504696-2505099~~~NCTC8325intergenic_2451645-2452048
1	n347119	1717	567	589	1150	1441	0	0	No	0.992181	0.999878	7.35727e-05	-0.00969549	ATGTCCCAGACTCTTTAGTTTATTTATTTTCAA	33	TCH1516intergenic_2478113-2478687~~~NCTC8325intergenic_2425060-2426130
1	n349171	2	2	589	0	1441	0	0	No	NA	NA	NA	NA	AGAAAAATCTGGGACATTAATCGATCAAATACTCCCTTCAAAGTAGACATTGAATAAATGA	61	NCTC8325intergenic_977455-978260~~~TCH1516intergenic_1071528-1072182
1	n350893	2010	585	589	1425	1441	0	0	No	NA	NA	NA	NA	TTCTACAAACCTACGAGATGCATAAAACCCCATTAG	36	TCH1516intergenic_1179209-1179516~~~NCTC8325intergenic_1085307-1085614
1	n355743	2	2	589	0	1441	0	0	No	NA	NA	NA	NA	TTACACAGGAGTCTGGACTTGACTATGAATAATCTATGAATATGCTATCATGATATGGT	59
1	n355760	6	5	589	1	1441	0	0	No	NA	NA	NA	NA	TTTTACACAGGAGTCTGGACTTGACTTGAATATGCTATCATGATATGGTAATTTTG	56	TCH1516intergenic_756512-756724~~~NCTC8325intergenic_675684-675902
1	n355815	1505	95	589	1410	1441	0	0	Yes	1.6864e-07	1.37427e-05	0.0758346	-5.2724	ACATAGGCGCTTTTTTTATAAGTTAAAAATG	31
1	n356587	1503	95	589	1408	1441	0	0	Yes	3.56906e-07	2.77151e-05	0.07077	-5.12832	TGGTAAATCATGACATAGGCGCTTTTTTTATAAGTTAAAA	40
1	n356741	3	3	589	0	1441	0	0	No	NA	NA	NA	NA	ATTCATAGTCAAGTCCAGACTCCTGTGTAAAA	32
1	n356876	14	14	589	0	1441	0	0	No	NA	NA	NA	NA	ATTTTACACAGGAGTCTGGACTTGACTTGAA	31
1	n356897	1502	95	589	1407	1441	0	0	Yes	3.90695e-07	3.02551e-05	0.0696534	-5.11016	ATTTTTAACTTATAAAAAAAGCGCCTATGTCA	32
1	n357389	2027	589	589	1438	1441	0	0	No	NA	NA	NA	NA	CATGATTTACCATCACATAGGCGCTTATCAA	31	TCH1516intergenic_2825185-2826032~~~NCTC8325intergenic_2773601-2774449
1	n357768	2026	588	589	1438	1441	0	0	No	NA	NA	NA	NA	AAAAAAGCGCCTATGTCATGATTTACCATCACATAGGCGCTTATCA	46	TCH1516intergenic_2825185-2826032~~~NCTC8325intergenic_2773601-2774449
1	n362644	1	1	589	0	1441	0	0	No	NA	NA	NA	NA	AAAAAGAGGCTGGGACATAAATCCCTAAAAA	31	TCH1516intergenic_318637-318882~~~NCTC8325intergenic_264152-264824
1	n362972	3	3	589	0	1441	0	0	No	NA	NA	NA	NA	AAAAGAGGCTGGGACATAAATCCCTAAAAAA	31	TCH1516intergenic_2071731-2072077~~~NCTC8325intergenic_2018124-2018696~~~TCH1516intergenic_318637-318882~~~NCTC8325intergenic_264152-264824
1	n362973	1	1	589	0	1441	0	0	No	NA	NA	NA	NA	AAAAGAGGCTGGGACATAAATCCCTAAAAAGC	32	TCH1516intergenic_318637-318882~~~NCTC8325intergenic_264152-264824
1	n363280	1	0	589	1	1441	0	0	No	NA	NA	NA	NA	CAATTTAATTTATTTAAATATCAAAATTACTATATCATGATAGCATATTCATTTAAAGACA	61	TCH1516intergenic_756512-756724~~~NCTC8325intergenic_675684-675902
1	n363584	6	6	589	0	1441	0	0	No	NA	NA	NA	NA	AAAGAGGCTGGGACATAAATCCCTAAAAAAA	31
1	n364123	3	3	589	0	1441	0	0	No	NA	NA	NA	NA	AATATAAAAGAGGCTGGGACATAAATCCCTAAAAA	35	TCH1516intergenic_318637-318882~~~NCTC8325intergenic_264152-264824
1	n364662	6	6	589	0	1441	0	0	No	NA	NA	NA	NA	AAGAGGCTGGGACATAAATCCCTAAAAAGCA	31	TCH1516intergenic_318637-318882~~~NCTC8325intergenic_264152-264824
1	n364959	1	1	589	0	1441	0	0	No	NA	NA	NA	NA	ACCTGCTATACATCATTGCGCACTAAAAAGAGGCTGGGACATAAATCCCTAAAA	54	TCH1516intergenic_2672042-2672421~~~NCTC8325intergenic_2620534-2620913
1	n366266	2029	589	589	1440	1441	0	0	No	NA	NA	NA	NA	CAGCAGTAAGATAATTTTCAATTAGAAAATA	31	TCH1516intergenic_1804712-1805352~~~NCTC8325intergenic_1705641-1707965~~~TCH1516intergenic_2478113-2478687~~~TCH1516intergenic_2071731-2072077~~~NCTC8325intergenic_2018124-2018696~~~TCH1516intergenic_318637-318882~~~NCTC8325intergenic_264152-264824~~~TCH1516intergenic_2317347-2317802~~~TCH1516intergenic_1893139-1893485~~~NCTC8325intergenic_2263981-2266096~~~NCTC8325intergenic_1794848-1796426~~~TC…
1	n367098	1712	563	589	1149	1441	0	0	No	0.966804	0.999878	-0.000313385	0.0417827	AAAATAAATAAACTAAAGAGTCTGGGACATTA	32	TCH1516intergenic_2478113-2478687~~~NCTC8325intergenic_2425060-2426130
1	n367260	1	1	589	0	1441	0	0	No	NA	NA	NA	NA	AAAAGAGGCTGGGACATTAAGTTCTTAGGCAA	32	USA300HOU_RS06005;DBGWAS_general_tag=hypothetical_protein~~~NCTC8325intergenic_1110970-1111793
1	n367435	1709	560	589	1149	1441	0	0	No	0.100802	0.999878	0.012262	-1.64131	AATAAATAAACTAAAGAGTCTGGGACATTAATCCCTAAAAAA	42	TCH1516intergenic_2478113-2478687~~~NCTC8325intergenic_2425060-2426130
1	n367436	3	3	589	0	1441	0	0	No	NA	NA	NA	NA	AATAAATAAACTAAAGAGTCTGGGACATTACTGTAAAATTCTATAAATAGAATT	54	TCH1516intergenic_2478113-2478687~~~NCTC8325intergenic_2425060-2426130~~~TCH1516intergenic_1426269-1426808~~~NCTC8325intergenic_1332346-1333317~~~NCTC8325intergenic_1110970-1111793~~~TCH1516intergenic_1205173-1205687
1	n367912	1866	560	589	1306	1441	0	0	No	NA	NA	NA	NA	AAAGAGTCTGGGACATTAATCCCTAAAAAAA	31
1	n368928	1825	536	589	1289	1441	0	0	No	0.0285645	0.876092	0.0179406	-2.19053	AAGAGTCTGGGACATTAATCCCTAAAAAAAA	31
1	n368929	47	24	589	23	1441	0	0	No	NA	NA	NA	NA	AAGAGTCTGGGACATTAATCCCTAAAAAAACAGCAG	36
1	n368930	6	6	589	0	1441	0	0	No	NA	NA	NA	NA	AAGAGGCTGGGACATTAAGTTCTTAGGCAAT	31	NCTC8325intergenic_2425060-2426130~~~NCTC8325intergenic_1332346-1333317~~~USA300HOU_RS06005;DBGWAS_general_tag=hypothetical_protein~~~NCTC8325intergenic_1110970-1111793
1	n369224	2015	586	589	1429	1441	0	0	No	NA	NA	NA	NA	ACATTGCCTAAGAACTTAATGTCCCAGCCTC	31	NCTC8325intergenic_2425060-2426130~~~NCTC8325intergenic_1332346-1333317~~~USA300HOU_RS06005;DBGWAS_general_tag=hypothetical_protein~~~NCTC8325intergenic_1110970-1111793
1	n370220	1822	531	589	1291	1441	0	0	No	0.0373877	0.999878	0.0172644	-2.08332	AGAGTCTGGGACATTAATCCCTAAAAAAAACAGCA	35
1	n370226	10	10	589	0	1441	0	0	No	NA	NA	NA	NA	AGAGGCTGGGACATTAAGTTCTTAGGCAATG	31	NCTC8325intergenic_2425060-2426130~~~NCTC8325intergenic_1332346-1333317~~~USA300HOU_RS06005;DBGWAS_general_tag=hypothetical_protein~~~NCTC8325intergenic_1110970-1111793
1	n370817	159	0	589	159	1441	0	0	No	NA	NA	NA	NA	TTTTTTAGGGATTAATGTCCCAGACTCTTTC	31	TCH1516intergenic_2478113-2478687~~~NCTC8325intergenic_2425060-2426130
1	n373156	2030	589	589	1441	1441	0	0	No	NA	NA	NA	NA	ACACCTGCTATACATCATTGCGCACTAAAAAG	32	TCH1516intergenic_2672042-2672421~~~NCTC8325intergenic_2620534-2620913
1	n375352	1997	588	589	1409	1441	0	0	No	NA	NA	NA	NA	AAAAAAAGCGCCTATGTCATGATTTACCATC	31
1	n376835	2023	582	589	1441	1441	0	0	No	NA	NA	NA	NA	AATAAGTAATTGAAAGATAAAACATAAAAAA	31	TCH1516intergenic_2165192-2165509~~~NCTC8325intergenic_2111488-2111805
1	n378428	1504	95	589	1409	1441	0	0	Yes	2.4751e-07	1.97115e-05	0.0729881	-5.19837	ATGGTAAATCATGACATAGGCGCTTTTTTTA	31
1	n385564	7	7	589	0	1441	0	0	No	NA	NA	NA	NA	GAGCGCCTGCGCTAAGCGCATGCATAAGAGAG	32	TCH1516intergenic_2265137-2265636
1	n386436	1	1	589	0	1441	0	0	No	NA	NA	NA	NA	GAAAATATCATTTCTTTCCCACTCCCTAATTTGAGCTGGATATACT	46	NCTC8325intergenic_2815019-2815472~~~TCH1516intergenic_2866601-2866788
1	n386437	2024	585	589	1439	1441	0	0	No	NA	NA	NA	NA	GAAAATATCATTTCTGTCCCACTCCCTAATTTGAGCTGG	39	NCTC8325intergenic_977455-978260~~~NCTC8325intergenic_2815019-2815472~~~TCH1516intergenic_2866601-2866788
1	n386493	4	4	589	0	1441	0	0	No	NA	NA	NA	NA	AAAATTACCATATCATGATAGCATATTCATA	31	TCH1516intergenic_756512-756724~~~NCTC8325intergenic_675684-675902
1	n386494	1976	568	589	1408	1441	0	0	No	NA	NA	NA	NA	AAAATTACCATATCATGATAGCATATTCATTTA	33	TCH1516intergenic_756512-756724~~~NCTC8325intergenic_675684-675902
1	n386940	3	3	589	0	1441	0	0	No	NA	NA	NA	NA	AAATTACCATATCATGATAGCATATTCATAGATTA	35	TCH1516intergenic_756512-756724~~~NCTC8325intergenic_675684-675902
1	n387134	2028	588	589	1440	1441	0	0	No	NA	NA	NA	NA	TGAAAGTATATCCAGCTCAAATTAGGGAGTGGGA	34	NCTC8325intergenic_2815019-2815472~~~TCH1516intergenic_2866601-2866788
1	n387791	2021	584	589	1437	1441	0	0	No	NA	NA	NA	NA	ATTTTGCAATTGCAATGAATAACAAGAAAAATCTGGGACATTAATCGATC	50	NCTC8325intergenic_977455-978260~~~TCH1516intergenic_1071528-1072182
1	n388233	1978	570	589	1408	1441	0	0	No	NA	NA	NA	NA	ACCATATCATGATAGCATATTCATTTAAAGACA	33	TCH1516intergenic_756512-756724~~~NCTC8325intergenic_675684-675902
1	n388378	2	1	589	1	1441	0	0	No	NA	NA	NA	NA	TATAACTTGCATGTCTTTAAATGAATATGCTATCATGA	38	TCH1516intergenic_756512-756724~~~NCTC8325intergenic_675684-675902
1	n388591	1979	570	589	1409	1441	0	0	No	NA	NA	NA	NA	ATATCATGATAGCATATTCATTTAAAGACATG	32	TCH1516intergenic_756512-756724~~~NCTC8325intergenic_675684-675902
1	n388700	1982	570	589	1412	1441	0	0	No	NA	NA	NA	NA	ATCATGATAGCATATTCATTTAAAGACATGC	31	TCH1516intergenic_756512-756724~~~NCTC8325intergenic_675684-675902
1	n388783	1977	569	589	1408	1441	0	0	No	NA	NA	NA	NA	ATTACCATATCATGATAGCATATTCATTTAAAG	33	TCH1516intergenic_756512-756724~~~NCTC8325intergenic_675684-675902
1	n388872	2012	586	589	1426	1441	0	0	No	NA	NA	NA	NA	ATTTCTACAAACCTACGAGATGCATAAAACCC	32	TCH1516intergenic_1179209-1179516~~~NCTC8325intergenic_1085307-1085614
1	n388955	1980	572	589	1408	1441	0	0	No	NA	NA	NA	NA	ATGAATATGCTATCATGATATGGTAATTTTG	31	TCH1516intergenic_756512-756724~~~NCTC8325intergenic_675684-675902
1	n389105	2027	587	589	1440	1441	0	0	No	NA	NA	NA	NA	AGTATATCCAGCTCAAATTAGGGAGTGGGACA	32	NCTC8325intergenic_2815019-2815472~~~TCH1516intergenic_2866601-2866788
1	n389574	2013	587	589	1426	1441	0	0	No	NA	NA	NA	NA	GTATTTCTACAAACCTACGAGATGCATAAAAC	32	TCH1516intergenic_1179209-1179516~~~NCTC8325intergenic_1085307-1085614
1	n392754	2005	586	589	1419	1441	0	0	No	NA	NA	NA	NA	GTATATATTCATTTTCTTTTACATGTAAAAC	31	TCH1516intergenic_756512-756724~~~NCTC8325intergenic_675684-675902
1	n397424	2028	587	589	1441	1441	0	0	No	NA	NA	NA	NA	GTAATTTTGATATTTAAATAAATTAAATTGAGT	33	TCH1516intergenic_756512-756724~~~NCTC8325intergenic_675684-675902
1	n398324	2029	588	589	1441	1441	0	0	No	NA	NA	NA	NA	ATTACTCAATTTAATTTATTTAAATATCAAAAT	33	TCH1516intergenic_756512-756724~~~NCTC8325intergenic_675684-675902
1	n399238	1916	526	589	1390	1441	0	0	No	NA	NA	NA	NA	AAAAAAAGCACTTCCCAAAAATGGAAAGTGC	31
1	n399364	2002	580	589	1422	1441	0	0	No	NA	NA	NA	NA	CAAAAATTCTATTTATAGAATTTTACAGTAATGT	34	TCH1516intergenic_2478113-2478687~~~NCTC8325intergenic_2425060-2426130~~~TCH1516intergenic_1426269-1426808~~~NCTC8325intergenic_1332346-1333317~~~NCTC8325intergenic_1110970-1111793~~~TCH1516intergenic_1205173-1205687
1	n402380	2015	587	589	1428	1441	0	0	No	NA	NA	NA	NA	TAAAACTACAATATTTTATTGAGCTATTTAAT	32	TCH1516intergenic_756512-756724~~~NCTC8325intergenic_675684-675902
1	n402619	2028	587	589	1441	1441	0	0	No	NA	NA	NA	NA	AAACTACAATATTTTATTGAGCTATTTAATTTGA	34	TCH1516intergenic_756512-756724~~~NCTC8325intergenic_675684-675902
1	n402700	2009	587	589	1422	1441	0	0	No	NA	NA	NA	NA	TAAATAGCTCAATAAAATATTGTAGTTTTACATGT	35	TCH1516intergenic_756512-756724~~~NCTC8325intergenic_675684-675902
1	n405791	2019	582	589	1437	1441	0	0	No	NA	NA	NA	NA	AACAAGAAAAATCTGGGACATTAATCGATCAAAT	34	NCTC8325intergenic_977455-978260~~~TCH1516intergenic_1071528-1072182
1	n407728	2018	579	589	1439	1441	0	0	No	NA	NA	NA	NA	CTCCCTTCAAAGTAGACATTGAATAAATGAAG	32	NCTC8325intergenic_977455-978260~~~TCH1516intergenic_1071528-1072182
2	n162	1	0	589	1	1441	0	0	No	NA	NA	NA	NA	ATATCTAAAAAAACAACGTTAGGATTATATCCTTCAATAAGTTTCATTGCATCGAGACCAT	61	USA300HOU_RS06720;DBGWAS_general_tag=DNA-binding_response_regulator~~~SAOUHSC_01314;DBGWAS_general_tag=hypothetical_protein
2	n163	1497	60	589	1437	1441	0	0	Yes	0.000180388	0.0105132	0.109347	-3.92825	ATATCTAAAAAAACAACGTTAGGATTATATTCTTCAA	37
2	n429	1499	60	589	1439	1441	0	0	Yes	2.23429e-08	1.97583e-06	0.197023	-5.96818	AAAAAACAACGTTAGGATTATATTCTTCAATAAG	34	USA300HOU_RS06720;DBGWAS_general_tag=DNA-binding_response_regulator~~~SAOUHSC_01314;DBGWAS_general_tag=hypothetical_protein
2	n2713	528	528	589	0	1441	0	0	Yes	3.62733e-11	3.91095e-09	-0.251127	-7.11767	GCATTTCTATATCTAAAATAACAACGTTAGGATTATATTCTTCAATAAG	49	USA300HOU_RS06720;DBGWAS_general_tag=DNA-binding_response_regulator~~~SAOUHSC_01314;DBGWAS_general_tag=hypothetical_protein
2	n8819	1	0	589	1	1441	0	0	No	NA	NA	NA	NA	AACAACGTTAGGATTATATTCTTCAATAAGATTCATTGCATCGAGACCATTATCAGTATCT	61	USA300HOU_RS06720;DBGWAS_general_tag=DNA-binding_response_regulator~~~SAOUHSC_01314;DBGWAS_general_tag=hypothetical_protein
2	n8820	2026	588	589	1438	1441	0	0	No	NA	NA	NA	NA	AACAACGTTAGGATTATATTCTTCAATAAGTTTCATTGCAT	41	USA300HOU_RS06720;DBGWAS_general_tag=DNA-binding_response_regulator~~~SAOUHSC_01314;DBGWAS_general_tag=hypothetical_protein
2	n11168	2	0	589	2	1441	0	0	No	NA	NA	NA	NA	TTGAAGAATATAATCCTAACGTTGTTTTTTAGATATAGAAATGCCAGGCATGAC	54	USA300HOU_RS06720;DBGWAS_general_tag=DNA-binding_response_regulator~~~SAOUHSC_01314;DBGWAS_general_tag=hypothetical_protein
2	n11850	1498	60	589	1438	1441	0	0	Yes	5.52258e-05	0.00344033	0.125226	-4.26018	ATATAATCCTAACGTTGTTTTTTTAGATATAGAAATGCC	39
2	n24454	1	0	589	1	1441	0	0	No	NA	NA	NA	NA	GGCATTTCTATATCTAAAAAAACAACGTTAAGATTATATTCTTCAATAAGTTTCATTGCAT	61	USA300HOU_RS06720;DBGWAS_general_tag=DNA-binding_response_regulator~~~SAOUHSC_01314;DBGWAS_general_tag=hypothetical_protein
2	n86887	2029	588	589	1441	1441	0	0	No	NA	NA	NA	NA	CGGTCTTTTAAAAGTTGTTACAATAATCACTTTAATATTCAAATGCTTTTTTCTAATTTCCGCTAAAACTT	71	USA300HOU_RS06720;DBGWAS_general_tag=DNA-binding_response_regulator~~~SAOUHSC_01314;DBGWAS_general_tag=hypothetical_protein
2	n87630	5	0	589	5	1441	0	0	No	NA	NA	NA	NA	GATATAGAAATGCCAGGCATGACTGGACTTAAAGTTTTAGCGGAAATTAGAAAAAAGCATT	61	USA300HOU_RS06720;DBGWAS_general_tag=DNA-binding_response_regulator~~~SAOUHSC_01314;DBGWAS_general_tag=hypothetical_protein
2	n90711	1	1	589	0	1441	0	0	No	NA	NA	NA	NA	TTTTTTCTAATTTCCGCTAAAACTTCAAGTACAGTCATGCCTGGCATTTCTATATCTAAAA	61	USA300HOU_RS06720;DBGWAS_general_tag=DNA-binding_response_regulator~~~SAOUHSC_01314;DBGWAS_general_tag=hypothetical_protein
2	n90712	2023	587	589	1436	1441	0	0	No	NA	NA	NA	NA	TTTTTTCTAATTTCCGCTAAAACTTCAAGTCCAGTCATGCCT	42	USA300HOU_RS06720;DBGWAS_general_tag=DNA-binding_response_regulator~~~SAOUHSC_01314;DBGWAS_general_tag=hypothetical_protein
2	n91126	2024	588	589	1436	1441	0	0	No	NA	NA	NA	NA	AATGCTTTTTTCTAATTTCCGCTAAAACTTCAAGT	35	USA300HOU_RS06720;DBGWAS_general_tag=DNA-binding_response_regulator~~~SAOUHSC_01314;DBGWAS_general_tag=hypothetical_protein
2	n94446	527	527	589	0	1441	0	0	Yes	1.04711e-09	1.03723e-07	-0.21664	-6.48049	CTAACGTTGTTATTTTAGATATAGAAATGCCAGGCATGACTG	42	USA300HOU_RS06720;DBGWAS_general_tag=DNA-binding_response_regulator~~~SAOUHSC_01314;DBGWAS_general_tag=hypothetical_protein
2	n94447	1	1	589	0	1441	0	0	No	NA	NA	NA	NA	CTAACGTTGTTATTTTAGATATAGAAATGCTAGGCATGACTGGACTTGAAGTTTTAGCGGA	61	USA300HOU_RS06720;DBGWAS_general_tag=DNA-binding_response_regulator~~~SAOUHSC_01314;DBGWAS_general_tag=hypothetical_protein
2	n99642	2022	586	589	1436	1441	0	0	No	NA	NA	NA	NA	TCCGCTAAAACTTCAAGTCCAGTCATGCCTGGCATTTCTATATC	44	USA300HOU_RS06720;DBGWAS_general_tag=DNA-binding_response_regulator~~~SAOUHSC_01314;DBGWAS_general_tag=hypothetical_protein
2	n108048	2027	586	589	1441	1441	0	0	No	NA	NA	NA	NA	AAGTCCAGTCATGCCTGGCATTTCTATATCTAAAA	35	USA300HOU_RS06720;DBGWAS_general_tag=DNA-binding_response_regulator~~~SAOUHSC_01314;DBGWAS_general_tag=hypothetical_protein
2	n112571	1499	60	589	1439	1441	0	0	Yes	7.21163e-07	5.36243e-05	0.166144	-5.26504	GTCATGCCTGGCATTTCTATATCTAAAAAAACAACGTTA	39
2	n113048	1501	60	589	1441	1441	0	0	Yes	3.1086e-15	4.49193e-13	0.335931	-8.50992	CAGTCATGCCTGGCATTTCTATATCTAAAAAA	32	USA300HOU_RS06720;DBGWAS_general_tag=DNA-binding_response_regulator~~~SAOUHSC_01314;DBGWAS_general_tag=hypothetical_protein
2	n147899	2029	588	589	1441	1441	0	0	No	NA	NA	NA	NA	CAATGGTTCAATTAATTAAACTACATGGTGATTTTGAAATTTTAGCAGATACTGATAATGGTCTCGATGCAATGAA	76	USA300HOU_RS06720;DBGWAS_general_tag=DNA-binding_response_regulator~~~SAOUHSC_01314;DBGWAS_general_tag=hypothetical_protein
2	n267567	2029	588	589	1441	1441	0	0	No	NA	NA	NA	NA	TAACATATTTTGATCTTCTGCAATAATTAAAGATGTCATGCTATTCCTCCT	51	USA300HOU_RS06720;DBGWAS_general_tag=DNA-binding_response_regulator~~~SAOUHSC_01314;DBGWAS_general_tag=hypothetical_protein
2	n273393	2029	588	589	1441	1441	0	0	No	NA	NA	NA	NA	GATACTTTGAAAAAGCAGTTGTGAATGATGTGGATGCATATGTTTTAA	48	USA300HOU_RS06720;DBGWAS_general_tag=DNA-binding_response_regulator~~~SAOUHSC_01314;DBGWAS_general_tag=hypothetical_protein
2	n305037	2026	588	589	1438	1441	0	0	No	NA	NA	NA	NA	TTAATTATTGCAGAAGATCAAAATATGTTACGACAG	36	USA300HOU_RS06720;DBGWAS_general_tag=DNA-binding_response_regulator~~~SAOUHSC_01314;DBGWAS_general_tag=hypothetical_protein
2	n305467	1	0	589	1	1441	0	0	No	NA	NA	NA	NA	ATTGCAGAAGATCAAAATATGTTACGACAGTCAATGGTTCAATTAATTAAACTACATGGTG	61	USA300HOU_RS06720;DBGWAS_general_tag=DNA-binding_response_regulator~~~SAOUHSC_01314;DBGWAS_general_tag=hypothetical_protein
2	n305468	2025	588	589	1437	1441	0	0	No	NA	NA	NA	NA	ATTGCAGAAGATCAAAATATGTTACGACAGGCAATGGTTCAATTAATTAAACTAC	55	USA300HOU_RS06720;DBGWAS_general_tag=DNA-binding_response_regulator~~~SAOUHSC_01314;DBGWAS_general_tag=hypothetical_protein
2	n315862	4	0	589	4	1441	0	0	No	NA	NA	NA	NA	GTGATTATTGTAACAACTTTTAAAAGACCGAGATACTTTGAAAAAGCAGTTGTGAATGATG	61	USA300HOU_RS06720;DBGWAS_general_tag=DNA-binding_response_regulator~~~SAOUHSC_01314;DBGWAS_general_tag=hypothetical_protein
2	n320293	2028	588	589	1440	1441	0	0	No	NA	NA	NA	NA	CACCATGTAGTTTAATTAATTGAACCATTGCCTGTC	36	USA300HOU_RS06720;DBGWAS_general_tag=DNA-binding_response_regulator~~~SAOUHSC_01314;DBGWAS_general_tag=hypothetical_protein
2	n334531	2028	588	589	1440	1441	0	0	No	NA	NA	NA	NA	AGATACTGATAATGGTCTCGATGCAATGAAACTTATTGAAG	41	USA300HOU_RS06720;DBGWAS_general_tag=DNA-binding_response_regulator~~~SAOUHSC_01314;DBGWAS_general_tag=hypothetical_protein
2	n335732	2027	588	589	1439	1441	0	0	No	NA	NA	NA	NA	GATTATATTCTTCAATAAGTTTCATTGCATCGAGACCAT	39	USA300HOU_RS06720;DBGWAS_general_tag=DNA-binding_response_regulator~~~SAOUHSC_01314;DBGWAS_general_tag=hypothetical_protein
2	n340575	2025	588	589	1437	1441	0	0	No	NA	NA	NA	NA	GTGATTATTGTAACAACTTTTAAAAGACCGGGATACTTTGAAAAAGCAGTTGTGAATGATG	61	USA300HOU_RS06720;DBGWAS_general_tag=DNA-binding_response_regulator~~~SAOUHSC_01314;DBGWAS_general_tag=hypothetical_protein
2	n350406	3	0	589	3	1441	0	0	No	NA	NA	NA	NA	TTAATTATTGCAGAAGATCAAAATATGTTATGACAGGCAATGGTTCAATTAATTAAACTAC	61	USA300HOU_RS06720;DBGWAS_general_tag=DNA-binding_response_regulator~~~SAOUHSC_01314;DBGWAS_general_tag=hypothetical_protein
3	n383	1	1	589	0	1441	0	0	No	NA	NA	NA	NA	GATAAGATAATGTGTAATAATCACAAAAAAAGTTAAATATTTTAAGGCTTGTTTA	55
3	n394	1	0	589	1	1441	0	0	No	NA	NA	NA	NA	CGCCAGACCATACATTTTTAAATGTATGCATATTTCCCTTATGCTCTTACAAAAATTTTAGTATAAAATCAAAGTTAGGGGGGATTCGTTGTATGAAAAAGACAAAAACCACAATAACTGTTAGAGATGTTGATCCAGAAATAAAAGAGAATTTAAAACAAGAAGCTAACAAAAAAGGCTTAACTTTTAACAAGTATATGAATGAGTTGTTTGAAATTAATGATCCTAAAGAAGTATATAAAAAACTATACGAAGAAACATCTCATCAACAAGCTATTAGTATAAAAGTAATGAAAGAAATGACAAAAAAATTAGATGATATTCATAAAATAATGAAACAAATAGAAGAAGAGTGATAAATAATGAAACCAAAAATTATTACTAAATCTGAATTTGAAC…	7780
3	n880	227	224	589	3	1441	0	0	No	0.00111987	0.0557607	-0.0656837	-3.29599	AAAAAAGTTAAATATTTTAAGGCTTGTTTAATTATTAATGATTTTATATA	50
3	n1600	1	1	589	0	1441	0	0	No	NA	NA	NA	NA	CGTGTTGAGAGCCTGGATTATCATTTAAAAATTCCTAAACTGTTCTTTCTTATCTTCGTC	60	USA300HOU_RS00135;DBGWAS_general_tag=hypothetical_protein
3	n2708	2	2	589	0	1441	0	0	No	NA	NA	NA	NA	TTAAATATCATCTAAAACCAGAAGAGAAGAAGTTTTTAAAGTATGGAGGAAAATTATAAGACCAGTAACCTTAATGCAGAGGTTACTGGTCTCTTAAAATCCTATGCAAAATAAAGCTTTAAACTGATGTAAACCATCTTTTAAAGTGATAAACGTCTTCCCCTAGTAATTTATTTCTTTTGCGAATTTATAAATTTGTAATCGAGGGAGCAACTGTATAGTCGAGTTAAGTTGACTTATCTGATAAGACATTGTGTTCTTTTAAATTAGGTGATGTGATAGAATTATAACGGTCATCTAGTTAACTTCTGTGCTGATAGCATGGAAGGAGGTGACATCATGCATAGCATTCTATTTGAATTGTTGATTGCACCCATTATTGTTGGTGTAATCATCACA…	1280
3	n2896	1619	233	589	1386	1441	0	0	No	0.800587	0.999878	0.00676554	-0.252476	CGTGTTGAGAGCCTGGATTATCATTTAAAATATTCCTAAACTGTTCTTTCTTATCTTCGTC	61	USA300HOU_RS00135;DBGWAS_general_tag=hypothetical_protein
3	n5258	227	224	589	3	1441	0	0	No	0.00111987	0.0557607	-0.0656837	-3.29599	AAATAAAATTGTGATCTAATAAAAATAGAAACTGTAATTTAAATAAAACTTTCTAAATAAGCTAACTGATAAAAAATCAGTTTGTCCACAGTCTGAAACAAGATTCCTATATTCTTTAGGAATCTTGTTTTTTCTATTTTTATGGTGATAAAGAGCAGATAAGATAATGTGTAATAATCACAAAAAA	187
3	n6005	17	9	589	8	1441	0	0	No	NA	NA	NA	NA	ACGAAAAATTATGTTGAAGAGCTTATATTATCACCAATCGTCACCATCATTACTTCATGGTGATCTTTGGAAAGGAAATATTCTTTTTCAAAAAAATGGAGATCCTATTCTATGTGATCCAGTCTGTTTATATGGAGATAGAGAATTTG	149
3	n6091	1620	234	589	1386	1441	0	0	No	0.920549	0.999878	0.00292034	-0.0994947	AGCTAATTGATAATAAAATAGACGAAGATAAGAAAGAACAGTTTAGGAAT	50	USA300HOU_RS00135;DBGWAS_general_tag=hypothetical_protein
3	n9347	3	3	589	0	1441	0	0	No	NA	NA	NA	NA	GATAAAAAACTCGGTTTGCCTTCTGCAGTTTCTAAAACGATGTCATGTTCAGATGACCCATGCCCACTAAAATGGATAATATGAGGTTTCACCTCATTAATGGCTTGTAGGAGATCACTAGACCTAACCGCCCAACGAGAATGCAGATTAATCGATTCACGATATTCAGAAGCTCGAATTTTTTCTTTCTATCTAATACTATGAACAGTTAATAAAATCGTATACATTAAAAATCTTCAATTTATAGGTCAAAATCGTTATCTTGCTAACATTTTTGATCATTATAGTGGTATATTCTATTTTTTAGTGTTCATGACTATGCGTAATATCATCATCCCTGCACATTACAGAATCCTTATGAGGGTGGTTTTCACTCTCCATCTGAATCGTTGCATGTCC…	2741
3	n9367	1	0	589	1	1441	0	0	No	NA	NA	NA	NA	CTATATTTTTTTACTTTGCAACAGAACCGACAATCCGATATGTCGATGGAGTGAAAGA	58	USA300HOU_RS14800;DBGWAS_general_tag=aminoglycoside_O-phosphotransferase_APH(3\')-IIIa
3	n11881	1	1	589	0	1441	0	0	No	NA	NA	NA	NA	GCTATTCGTATAGGGACAATCCGATATGTCAATGGAGTGAAAGAGCCTGATGCACTCCGCA	61	USA300HOU_RS14800;DBGWAS_general_tag=aminoglycoside_O-phosphotransferase_APH(3\')-IIIa
3	n11882	1144	67	589	1077	1441	0	0	Yes	0.000100406	0.00605307	0.0856234	-3.91013	GACAATCCGATATGTCGATGGAGTGAAAGAGCCTGATGC	39	USA300HOU_RS14800;DBGWAS_general_tag=aminoglycoside_O-phosphotransferase_APH(3\')-IIIa
3	n13197	1617	234	589	1383	1441	0	0	No	0.819917	0.999878	0.00529533	-0.227722	GGAGAAAAATTAGCGCTAAATTACTTTAATGAGCTAATTGATAATAAAATAGACGAAGATA	61	USA300HOU_RS00135;DBGWAS_general_tag=hypothetical_protein
3	n14106	1144	68	589	1076	1441	0	0	No	0.896541	0.999878	-0.0030013	0.129965	CTAAGCTATTCGTATAGGGACAATCCGATATGTC	34	USA300HOU_RS14800;DBGWAS_general_tag=aminoglycoside_O-phosphotransferase_APH(3\')-IIIa
3	n16867	1	0	589	1	1441	0	0	No	NA	NA	NA	NA	ATATTTTTTTACTTTGCAACAGAACCGTTTATTTTTTGTTTTAAAACAAAAAATAA	56
3	n17217	1143	67	589	1076	1441	0	0	Yes	0.000105697	0.00635836	0.0854335	-3.89913	TCTTTCACTCCATCGACATATCGGATTGTCCCTATACGAATAGC	44	USA300HOU_RS14800;DBGWAS_general_tag=aminoglycoside_O-phosphotransferase_APH(3\')-IIIa
3	n17973	2	2	589	0	1441	0	0	No	NA	NA	NA	NA	CTATATTTTTTTACTTTGCAACAGAACCTAGAAACTCCCACATAACAAATTTTTCACGCTTGCTATTACTCGAATTACCTTGTGCTTGCCTTAGTGCATGACTACCTTTAGCAGTAATTGAATATAGTGAAAAACCAGTGATTTTTCTGTTCTTTTCCAGCAAAGAATTATATTGTATTGATTTTTGGCTAACAAAGCCAACTTTCTTTAACCAGCCACAAATCATTCTCGCATATTTATCTGCTGTGCCTTCTACATCTGATCTTATTTTTAATTCTTCTTTTTTATTTTCAGACTCTTTAATCCAGTCTAACATAAGTTCTTCAGAGTATGAGGTGAAACCAGGCTCGTCTTTAAAACCTAAACGATTACCTATAAAAAACTTTGTTACTTCTGTAT…	1225
3	n19475	1292	12	589	1280	1441	0	0	No	0.626943	0.999878	-0.00598665	0.485768	ATATTTTTTTACTTTGCAACAGAACCTATAAA	32
3	n19928	1303	23	589	1280	1441	0	0	No	0.681158	0.999878	-0.00480876	0.410661	ATAGGTTCTGTTGCAAAGTAAAAAAATATAG	31
3	n23889	10	10	589	0	1441	0	0	No	NA	NA	NA	NA	TATAACACTGGTTAATAGAGGAATGCAAAATAACATATAATTAAATTTAAATTAAAGTATAATATAAACAAAAAAGGAGACAATACAAATGGATAAAGGATCAGAGTGGATTCGATGGGATTTGCATGTTCACACTCGTTCGTCAGAAGATTATAAATATATGCATGATGACGCTGAAGAAAAGTTAGTGGAAGAGTGGAAAAAACAAGGAATTAAAGCAGTAGCAATAACAGATCATTTTACTATAGACTCAGATAGAATTAATAAATTAAGAGAGTTAGCTAAAGGAGAAATAACAATTTTTCCTGGAGTAGAATTAAGGACAGATAAAGGATCTACTAATATTCATGTAATTGGAATATTTTCTGAGCATAAAAATTTAAAAGAGCTTCAAAATGA…	1244
3	n25257	1300	20	589	1280	1441	0	0	No	0.691426	0.999878	-0.00473266	0.396698	TATATTTTTTTACTTTGCAACAGAACCTATA	31
3	n25702	1	0	589	1	1441	0	0	No	NA	NA	NA	NA	GTTTATTTTTTGTTTTAAAACAAAAAATAAAC	32
3	n30235	4	4	589	0	1441	0	0	No	NA	NA	NA	NA	CAACAAACTGGCCCGTTTGTTGAACTACTCGGTTCTGTTGCAAAGTTGAATTTATAGT	58	TCH1516intergenic_12245-12506
3	n30961	7	7	589	0	1441	0	0	No	NA	NA	NA	NA	TAAATTCAACTTTGCAACAGAACCGTTTTTTATATATCTTTTTTTATTCTTTTATATTGTAAAAGATTTTTGCAGTTTAACTTATCTGAAGCACATATACCTACGTGTTTATAGGTGGTTATAATAGCGGAGTCTCCTTAACTTCCATAGGCGAAATTACTATGGAAGAAGGTGAAAATCTTCAGGCTTTTTATTCGTAACGATTATTGCACCTGTGATAACTGGATGCATTGTAGCTTGGTTTGCCTATTGGCTAAGCCAGCGCAATAAATAGGCGACTATTCATGTCAGATAAAGGGCCCAACCTAAG	310
3	n32544	227	224	589	3	1441	0	0	No	0.00111987	0.0557607	-0.0656837	-3.29599	TATATAAAGAGCAGTATAATAAAGTTGTTAATATATTATGAATAATATTCAAGTAATTTTAT	62
3	n33045	1	0	589	1	1441	0	0	No	NA	NA	NA	NA	GTTCATCTTCATACTCTTCCGAGCAAAGGATTTCATTTTCTCCCACCAGCTTATATACCT	60	USA300HOU_RS14800;DBGWAS_general_tag=aminoglycoside_O-phosphotransferase_APH(3\')-IIIa
3	n33188	109	47	589	62	1441	0	0	No	NA	NA	NA	NA	GAGTAGTTCAACAAACGGGCCAGTTTGTTGAAGATTAGATG	41
3	n33235	1	1	589	0	1441	0	0	No	NA	NA	NA	NA	TAACAACTTTATTATACTGCTCTTTATATAAAATCATTAATAATTAAACAAGCC	54
3	n33236	226	223	589	3	1441	0	0	Yes	0.000751878	0.0392416	-0.065838	-3.40951	TAACAACTTTATTATACTGCTCTTTATATATAAAATCATTAATAATTAAACAAGCC	56
3	n33689	4	0	589	4	1441	0	0	No	NA	NA	NA	NA	TATATTTTTTTACTTTGCAACAGAACCGTAATTGTTTTACTAATAAGGTGTTTTAAA	57	TCH1516intergenic_25102-25347
3	n34353	1	0	589	1	1441	0	0	No	NA	NA	NA	NA	CTATAAATTCAACTTTGCAACAGAACCGATATTTTTCAAATAATTATCTATTTAAAAAAGGACATATATGACAATCAATATTTTTAACTTTCTCTGCTATATGAAAAGAAGTGATTTTTGCATTCCTCTATTAACCAGTGTTATA	145
3	n34916	1610	235	589	1375	1441	0	0	Yes	0.000455704	0.0247988	0.0686184	-3.51803	CATACTTTCTCTTCTGGTTGGAATGTGTGGTTCTGTAATAACGAAATTAAACTTAAGTATAATGATCCTGTATAAATGTTACCAACATC	89	USA300HOU_RS14915;DBGWAS_general_tag=thiolase-like_protein
3	n36575	1	0	589	1	1441	0	0	No	NA	NA	NA	NA	TCACAATTTTATTTTAGCTCTTGTTCAAGTGATCATTTTTCGCCAAAAACTTTATACTGAA	61	USA300HOU_RS00135;DBGWAS_general_tag=hypothetical_protein~~~TCH1516intergenic_35769-35876
3	n39584	2	0	589	2	1441	0	0	No	NA	NA	NA	NA	GGTGAAAAAAACTATGCACAGGAGTTGGAGGGTTCTGTTGCAAAGTAAAAAAATATA	57
3	n42227	21	1	589	20	1441	0	0	No	NA	NA	NA	NA	TAGAAATACTGGAATTATATCGATTCCATGTCTCTGTAGTCATACCATGTGTTCTTAAAGAACGGATTTTTTCATGAAAATCCTTATTGTTAGTAGCAATTACTCCGCCTTCACCTGTTGTTATATTTTTATTAGGATAAAAACTAAAACAAGCTAGATCTCCATAAGTACCTAAAGATTTATTGTTGTAACTACTAGTAATAGCATGTGCAGCATCTTCAATTAAATATAGATTGTATTCTTTTGCTAATTTAGAAATTTCTTCAATATTGTATGTATATCCAGCGTAATGAACGATAATAATTCCTTTAGTTTTGGATGTTATATTTTTTCG	334
3	n43078	14	8	589	6	1441	0	0	No	NA	NA	NA	NA	TGGAGATAGAGAATTTGATATTGGATATACTCTAGCATTAGAAAAATTTCCATTAGATTTTTATCAAGAATATAATAATATATATCCGTTGTGTGTTGGATATGAAAAGCGAATAGAATTTTACAAGTTATATGTGTTTATGATTCATTTATTTGCTATAGGTACAGATTTTTATG	176
3	n45933	1	1	589	0	1441	0	0	No	NA	NA	NA	NA	TTAAGTTTAAAAGCTTTAATTACTTTAGCCGGTTCTGTTGCAAAGTAAAAAAATATAG	58	USA300HOU_RS14945;DBGWAS_general_tag=IS6_family_transposase~~~USA300HOU_RS00140;DBGWAS_general_tag=IS6_family_transposase_IS431mec
3	n46791	16	16	589	0	1441	0	0	No	NA	NA	NA	NA	TATAACACTGGTTAATAGAGGAATGCAAAAGAGTATCTATTATTAATTAAAAAACATAAAGTTATATAGTTTGACAATTAATGGAGGTTTTTCTATTCCAAATTTATTTAAGTTATTCATCATTTTAACGAACTTAGAGTATTTATAAAACCTCCAGGATAACCAAATTAATAGAATTATAATGATAGGCAAAGATACCATAAAATTATTATTAATATTAAATATATCTAAAACTTGAATAATAGAGAAACAAGTGATTATAAAAGTTAAAAT	273
3	n53570	6	0	589	6	1441	0	0	No	NA	NA	NA	NA	ACTTTGCAACAGAACCGAAAAGAAGATAGATAATGTAAGTTATGCA	46
3	n53760	1	0	589	1	1441	0	0	No	NA	NA	NA	NA	ATATTTTTTTACTTTGCAACAGAACCTATTAAAACATTAGAAGCATTAGAAATGTT	56	USA300HOU_RS14860;DBGWAS_general_tag=ABC-F_type_ribosomal_protection_protein_Msr(A)
3	n57263	1144	68	589	1076	1441	0	0	No	0.971898	0.999878	0.000800151	-0.035211	GCTCGGAAGAGTATGAAGATGAACAAAGCCCTGAAAAGATTATCGA	46	USA300HOU_RS14800;DBGWAS_general_tag=aminoglycoside_O-phosphotransferase_APH(3\')-IIIa
3	n57264	1	0	589	1	1441	0	0	No	NA	NA	NA	NA	CTCGGAAGAGTATGAAGATGAACAAAGCCTTGAAAAGATTATCGAGCTGTATGCGGAGTG	60	USA300HOU_RS14800;DBGWAS_general_tag=aminoglycoside_O-phosphotransferase_APH(3\')-IIIa
3	n57265	1	0	589	1	1441	0	0	No	NA	NA	NA	NA	CTCGGAAGAGTATGAAGATGAACAAAGCCTGAAAAGATTATCGAGCTGTATGCGGAG	57	USA300HOU_RS14800;DBGWAS_general_tag=aminoglycoside_O-phosphotransferase_APH(3\')-IIIa
3	n57266	1	0	589	1	1441	0	0	No	NA	NA	NA	NA	CGATGGCGTCCTTTGCTCGGAAGAGTATGAGATGAACAAAGCCCTGAAAAGATTATCGA	59	USA300HOU_RS14800;DBGWAS_general_tag=aminoglycoside_O-phosphotransferase_APH(3\')-IIIa
3	n58569	1	0	589	1	1441	0	0	No	NA	NA	NA	NA	TTTGCAACAGAACCGTATTTTATGAGTACATTCTAAATTAAGGAGATGTATAATCAATCTA	61	TCH1516intergenic_21070-21543
3	n58605	1172	52	589	1120	1441	0	0	No	0.964742	0.999878	0.000923202	-0.0441164	AACATTTCTAATGCTTCTAATGTTTTAATATCTAA	35	USA300HOU_RS14860;DBGWAS_general_tag=ABC-F_type_ribosomal_protection_protein_Msr(A)
3	n60325	1	0	589	1	1441	0	0	No	NA	NA	NA	NA	ATGGCTGGAGCAATCTGCTCATGAGTGAGGACGATGGCGTCCTTTGCTCGGAAGAGTATGA	61	USA300HOU_RS14800;DBGWAS_general_tag=aminoglycoside_O-phosphotransferase_APH(3\')-IIIa
3	n61784	1143	68	589	1075	1441	0	0	No	0.951892	0.999878	0.00138627	-0.0603487	GTTCATCTTCATACTCTTCCGAGCAAAGGACGCCATCG	38	USA300HOU_RS14800;DBGWAS_general_tag=aminoglycoside_O-phosphotransferase_APH(3\')-IIIa
3	n61818	1613	237	589	1376	1441	0	0	No	0.421214	0.999878	-0.017295	0.804164	AGAAATCTTTAGTGGTTCAATCGTTAAAGGATATGACAAAGCATTAGATAAAGAGAA	57	USA300HOU_RS14915;DBGWAS_general_tag=thiolase-like_protein
3	n62019	82	81	589	1	1441	0	0	No	NA	NA	NA	NA	TATTATATTGCATTGGAAAAAGAAAACCTTCTGTATAAGGAGATGTTATATGATATTTGGTAAACTGTTCGGCAGTTTGGGCGTAGAAAGCTTTTGCTCCTTGAACATCACGTTTGCCAGTTACAATGTCATTTAACAAGTTTAAAGATAAAAAATTCATCGCTTCCTCATGACACTTTGCTGATGCCTCACCTGTAGTTCGATCTAAGTAGACACTTCCATCAAAAGCGGCAATCGCATCATATAAGTGTACGGGCACTTTATAATCG	269
3	n62450	5	4	589	1	1441	0	0	No	NA	NA	NA	NA	TATTTTTTACTTTGCAACAGAACCGAAAATAA	32
3	n63415	2	0	589	2	1441	0	0	No	NA	NA	NA	NA	AGGCTTTGTTCATCTTCATACTCTTCCGAGC	31	USA300HOU_RS14800;DBGWAS_general_tag=aminoglycoside_O-phosphotransferase_APH(3\')-IIIa
3	n63791	1145	68	589	1077	1441	0	0	No	0.989923	0.999878	0.0003069	-0.0126588	TCCTTTGCTCGGAAGAGTATGAAGATGAACAAAGCC	36	USA300HOU_RS14800;DBGWAS_general_tag=aminoglycoside_O-phosphotransferase_APH(3\')-IIIa
3	n63815	1142	68	589	1074	1441	0	0	No	0.91805	0.999878	-0.00223312	0.102848	CTGGAGCAATCTGCTCATGAGTGAGGCCGATGGCGTCCTTTGCTCGGAAGAGTATGA	57	USA300HOU_RS14800;DBGWAS_general_tag=aminoglycoside_O-phosphotransferase_APH(3\')-IIIa
3	n67320	1620	234	589	1386	1441	0	0	No	0.920549	0.999878	0.00292034	-0.0994947	CATAAAAAATGGTTCCTCAATACTAGAAGATGTAGATGTTTTAATTTCAATAAATTTTTCTACAGCTTTATCTGTATTTGTTGGATCAAAAGCTACTAAATCATAGCCATGACCGTGTTGAGAGCCTGGATTATCATTTAAAA	143	USA300HOU_RS00135;DBGWAS_general_tag=hypothetical_protein
3	n69066	1	0	589	1	1441	0	0	No	NA	NA	NA	NA	AGGAGCAGTAGGAGAAATCTTTAGTGGTTCTGTAATAACAGGATATGACAAAGCATTAGATAAAGAGAA	69	USA300HOU_RS14915;DBGWAS_general_tag=thiolase-like_protein
3	n71287	1	1	589	0	1441	0	0	No	NA	NA	NA	NA	TAAATTCAACTTTGCAACAGAACCAGAAATCTTTAGTGGTTCAATCGTTAAAGG	54	USA300HOU_RS14915;DBGWAS_general_tag=thiolase-like_protein
3	n71407	1613	236	589	1377	1441	0	0	No	0.384995	0.999878	-0.0189798	0.868715	GAACCACTAAAGATTTCTCCTACTGCTCCTGAACCATAACTAAATAG	47	USA300HOU_RS14915;DBGWAS_general_tag=thiolase-like_protein
3	n72041	1612	236	589	1376	1441	0	0	No	0.389001	0.999878	-0.0178419	0.861348	CCTTTAACGATTGAACCACTAAAGATTTCTCCTACTGCTCCT	42	USA300HOU_RS14915;DBGWAS_general_tag=thiolase-like_protein
3	n74257	1609	235	589	1374	1441	0	0	Yes	0.000671115	0.035231	0.0653194	-3.41246	TAATGATCCTGTATAAATGTTACCAACATCTCTATTCCATAATAC	45	USA300HOU_RS14915;DBGWAS_general_tag=thiolase-like_protein
3	n74258	1	0	589	1	1441	0	0	No	NA	NA	NA	NA	TAATGATCCTGTATAAATGTTACCAACATCGGTTCTGTTGCAAAGTTGAATTTATAG	57	USA300HOU_RS14915;DBGWAS_general_tag=thiolase-like_protein
3	n80890	2019	579	589	1440	1441	0	0	No	NA	NA	NA	NA	ATTAAATATGAATTACTTAGTTCCTATTCGGAGCGAGAAATCCAACAACAAGAA	54	USA300HOU_RS06970;DBGWAS_general_tag=anthranilate_phosphoribosyltransferase~~~SAOUHSC_01368;DBGWAS_general_tag=anthranilate_phosphoribosyltransferase
3	n80893	6	6	589	0	1441	0	0	No	NA	NA	NA	NA	AACTGATATTAAATATGAATTACTTAGTTCTTATTCGGAGCGAGAAATCCAACAACAAGAA	61	USA300HOU_RS06970;DBGWAS_general_tag=anthranilate_phosphoribosyltransferase~~~SAOUHSC_01368;DBGWAS_general_tag=anthranilate_phosphoribosyltransferase
3	n84200	2	0	589	2	1441	0	0	No	NA	NA	NA	NA	ATCTATAAAATAAAATTGTGGTTCTTTACCAGAAACATTAAATATTCTTAATATTAAATAT	61	USA300HOU_RS00135;DBGWAS_general_tag=hypothetical_protein
3	n86436	3	0	589	3	1441	0	0	No	NA	NA	NA	NA	ATAAATTCAACTTTGCAACAGAACCGAAAAGAAGATAGA	39
3	n86437	1	1	589	0	1441	0	0	No	NA	NA	NA	NA	CTATAAATTCAACTTTGCAACAGAACCGTCAAAAGTAAACTCTAACCACTCAATCT	56	TCH1516intergenic_21070-21543
3	n89919	1143	67	589	1076	1441	0	0	No	0.946163	0.999878	-0.00151531	0.0674956	ACGAATAGCTTAGACAGCCGCTTAGCCGAATTGGATTACTTACT	44	USA300HOU_RS14800;DBGWAS_general_tag=aminoglycoside_O-phosphotransferase_APH(3\')-IIIa
3	n89920	1	1	589	0	1441	0	0	No	NA	NA	NA	NA	ACGAATAGCTTAGACAGCCGCTTAGCCGAAGTGGATTACTTACTGAATAACGATCTGGCCG	61	USA300HOU_RS14800;DBGWAS_general_tag=aminoglycoside_O-phosphotransferase_APH(3\')-IIIa
3	n89922	1	0	589	1	1441	0	0	No	NA	NA	NA	NA	TATCGGATTGTCCCTATACGAATAGCTTAGGCAGCCGCTTAGCCGAATTGGATTACTTACT	61	USA300HOU_RS14800;DBGWAS_general_tag=aminoglycoside_O-phosphotransferase_APH(3\')-IIIa
3	n90744	16	16	589	0	1441	0	0	No	NA	NA	NA	NA	ATATTATGAATAATATTCAAGTAATTTTATAGTCAAGTCCAGACTCCTGTGTAAA	55
3	n91747	1	0	589	1	1441	0	0	No	NA	NA	NA	NA	CTAAGCGGCTGTCTAAGCTATTCGTATAGGACAATCCATATGTCGATGGAGTGAAAGAGCCTGATGC	67	USA300HOU_RS14800;DBGWAS_general_tag=aminoglycoside_O-phosphotransferase_APH(3\')-IIIa
3	n91748	1143	68	589	1075	1441	0	0	No	0.947848	0.999878	-0.00142782	0.0653671	CTAAGCGGCTGTCTAAGCTATTCGTATAGGGACAATCCGATA	42	USA300HOU_RS14800;DBGWAS_general_tag=aminoglycoside_O-phosphotransferase_APH(3\')-IIIa
3	n92856	19	0	589	19	1441	0	0	No	NA	NA	NA	NA	TAATTACAGATCAGGCACCTTCAACGAAGGGCTAAAGTAATTAAAGCTTTTAAACTTAA	59	USA300HOU_RS14945;DBGWAS_general_tag=IS6_family_transposase~~~USA300HOU_RS00140;DBGWAS_general_tag=IS6_family_transposase_IS431mec~~~USA300HOU_RS14820;DBGWAS_general_tag=IS6_family_transposase~~~USA300HOU_RS14790;DBGWAS_general_tag=IS6-like_element_IS257_family_transposase
3	n94543	1189	52	589	1137	1441	0	0	No	0.88932	0.999878	0.00143897	-0.139236	ACGGTTCTGTTGCAAAGTTGAATTTATAATA	31	TCH1516intergenic_21070-21543
3	n94598	5	1	589	4	1441	0	0	No	NA	NA	NA	NA	TATAAATTCAACTTTGCAACAGAACCAGAAAT	32
3	n94606	76	32	589	44	1441	0	0	No	NA	NA	NA	NA	TATAAATTCAACTTTGCAACAGAACCGTAAAG	32	TCH1516intergenic_21070-21543
3	n94792	1143	68	589	1075	1441	0	0	No	0.947848	0.999878	-0.00142782	0.0653671	CCTATACGAATAGCTTAGACAGCCGCTTAGCCGAA	35	USA300HOU_RS14800;DBGWAS_general_tag=aminoglycoside_O-phosphotransferase_APH(3\')-IIIa
3	n95000	91	29	589	62	1441	0	0	No	NA	NA	NA	NA	ATATTATAAATTCAACTTTGCAACAGAACCA	31	TCH1516intergenic_21070-21543
3	n95001	10	2	589	8	1441	0	0	No	NA	NA	NA	NA	ATATTATAAATTCAACTTTGCAACAGAACCC	31	TCH1516intergenic_21070-21543
3	n95002	1146	40	589	1106	1441	0	0	No	0.740186	0.999878	0.00325465	-0.331487	ATATTATAAATTCAACTTTGCAACAGAACCT	31	TCH1516intergenic_21070-21543~~~USA300HOU_RS14825;DBGWAS_general_tag=hypothetical_protein
3	n95003	1191	52	589	1139	1441	0	0	No	0.770972	0.999878	0.00299934	-0.291145	ATATTATAAATTCAACTTTGCAACAGAACCG	31	TCH1516intergenic_21070-21543
3	n95038	1	0	589	1	1441	0	0	No	NA	NA	NA	NA	GAAGACTCCTTTTTGTTAAAATTATATTTAAATTCAACTTTGCAACAGAACCTCCTAA	58	TCH1516intergenic_21070-21543~~~USA300HOU_RS14825;DBGWAS_general_tag=hypothetical_protein
3	n95044	1	1	589	0	1441	0	0	No	NA	NA	NA	NA	GAAGACTCCTTTTTGTTAAAATTATATTTATAAATTCAACTTTGCAACAGAACCTCC	57	TCH1516intergenic_12245-12506~~~TCH1516intergenic_21070-21543~~~USA300HOU_RS14825;DBGWAS_general_tag=hypothetical_protein
3	n95834	1082	36	589	1046	1441	0	0	No	0.719731	0.999878	-0.0046416	0.358648	ATTATAAATTCAACTTTGCAACAGAACCTCC	31	TCH1516intergenic_12245-12506~~~TCH1516intergenic_21070-21543~~~USA300HOU_RS14825;DBGWAS_general_tag=hypothetical_protein
3	n95835	2	0	589	2	1441	0	0	No	NA	NA	NA	NA	TATTATAAATTCAACTTTGCAACAGAACCGAA	32	TCH1516intergenic_21070-21543
3	n95836	1190	52	589	1138	1441	0	0	No	0.831274	0.999878	0.00221994	-0.21314	ATTATAAATTCAACTTTGCAACAGAACCGTAT	32	TCH1516intergenic_21070-21543
3	n96746	1	1	589	0	1441	0	0	No	NA	NA	NA	NA	TATCCATTTTTCAGGAACATAATTTAAGACGGTTCTGTTGCAAAGTTGAATTTATAG	57	TCH1516intergenic_21070-21543
3	n97119	1083	37	589	1046	1441	0	0	No	0.721303	0.999878	-0.00466209	0.356546	AGGAGGTTCTGTTGCAAAGTTGAATTTATAA	31	TCH1516intergenic_12245-12506~~~USA300HOU_RS14825;DBGWAS_general_tag=hypothetical_protein
3	n97120	2	0	589	2	1441	0	0	No	NA	NA	NA	NA	AGGAGGTTCTGTTGCAAAGTTGAATTTATAGT	32	TCH1516intergenic_12245-12506~~~USA300HOU_RS14825;DBGWAS_general_tag=hypothetical_protein
3	n97544	2	0	589	2	1441	0	0	No	NA	NA	NA	NA	CCTTTACGGTTCTGTTGCAAAGTTGAATTTA	31
3	n97647	38	19	589	19	1441	0	0	No	NA	NA	NA	NA	ACTATAAATTCAACTTTGCAACAGAACCGAAA	32	TCH1516intergenic_12245-12506
3	n97648	77	32	589	45	1441	0	0	No	NA	NA	NA	NA	CTATAAATTCAACTTTGCAACAGAACCGTAA	31	TCH1516intergenic_21070-21543
3	n97649	1	0	589	1	1441	0	0	No	NA	NA	NA	NA	CTATAAATTCAACTTTGCAACAGAACCGTACAGCTTTGTATGATATCACTTTAAAAT	57	TCH1516intergenic_21070-21543~~~USA300HOU_RS15665;DBGWAS_general_tag=hypothetical_protein~~~TCH1516intergenic_1524-2387
3	n97650	5	0	589	5	1441	0	0	No	NA	NA	NA	NA	CTATAAATTCAACTTTGCAACAGAACCGTCGATAACATCTTTATATTCTTCTAGTGT	57	TCH1516intergenic_21070-21543
3	n97978	74	32	589	42	1441	0	0	No	NA	NA	NA	NA	TAAATTCAACTTTGCAACAGAACCGTAAAGA	31
3	n98046	21	18	589	3	1441	0	0	No	NA	NA	NA	NA	TATAAATTCAACTTTGCAACAGAACCGAAAA	31
3	n98058	1292	79	589	1213	1441	0	0	No	0.0847869	0.999878	0.0205702	-1.72338	TATATTATAAATTCAACTTTGCAACAGAACC	31	TCH1516intergenic_21070-21543
3	n98164	1	0	589	1	1441	0	0	No	NA	NA	NA	NA	TTATAAATTCAACTTTGCAACAGAACCGAAA	31	TCH1516intergenic_21070-21543
3	n98165	1	0	589	1	1441	0	0	No	NA	NA	NA	NA	TTATAAATTCAACTTTGCAACAGAACCGAACTCCATATACCTATGCATACAACCGAC	57	USA300HOU_RS14860;DBGWAS_general_tag=ABC-F_type_ribosomal_protection_protein_Msr(A)~~~TCH1516intergenic_21070-21543
3	n98167	1292	79	589	1213	1441	0	0	No	0.0847869	0.999878	0.0205702	-1.72338	TTATATTATAAATTCAACTTTGCAACAGAAC	31	TCH1516intergenic_21070-21543
3	n98674	15	0	589	15	1441	0	0	No	NA	NA	NA	NA	TTGTTTTTAACACTTTCAACAAAAAATGCGGTTCTGTTGCAAAGTAAAAAAATATAGC	58	USA300HOU_RS14890;DBGWAS_general_tag=replication_protein
3	n101068	2	0	589	2	1441	0	0	No	NA	NA	NA	NA	ATTGTGGTTCTTTACCGGAAACATTAAATACTCTTTTGTAAAATCTTTCTGCTTATATTCTTTCATAGCAAACAT	75	USA300HOU_RS00135;DBGWAS_general_tag=hypothetical_protein~~~TCH1516intergenic_16282-16386
3	n101905	16	1	589	15	1441	0	0	No	NA	NA	NA	NA	GATAATTTAATATTGTCAATTGAAGAAATACGAAAAAATATAACATCCAAAACTAAAGGA	60
3	n103862	9	0	589	9	1441	0	0	No	NA	NA	NA	NA	AAAATTCCATACAATAGGAGAAGTAAAGTGGTTCTGTTGCAAAGTAAAAAAATATAG	57	USA300HOU_RS15420;DBGWAS_general_tag=hypothetical_protein~~~NCTC8325intergenic_2001478-2002338
3	n104478	1	1	589	0	1441	0	0	No	NA	NA	NA	NA	CTATATTTTTTTACTTTGCAACAGAACCCTAATTATCTTCATCATTGTAAAACAAATT	58
3	n106679	219	216	589	3	1441	0	0	No	0.00341686	0.146758	-0.0551043	-2.95364	CTAATTATCTTCATCATTGTAAAACAAATTACACCCTTTAAATTTAACTCAACTTAAATATCGACAAATTAAAAAACAATAAAATT	86
3	n106918	1484	293	589	1191	1441	0	0	No	0.767555	0.999878	-0.0062306	0.295405	TGTAATGAAGGAATTTTAATATTCTAAATGCATAATAAATAC	42
3	n107035	218	215	589	3	1441	0	0	No	0.00455795	0.189014	-0.0524381	-2.86022	AATTTGTTTTACAATGATGAAGATAATTAGT	31
3	n107302	1	1	589	0	1441	0	0	No	NA	NA	NA	NA	ATTTGTTTTACAATGATGAAGATAATTAGTATATCAAAATAAAGGGGTTGGGACTGTTATG	61
3	n107303	217	214	589	3	1441	0	0	No	0.00489745	0.200132	-0.051486	-2.83749	ATTTGTTTTACAATGATGAAGATAATTAGTCTATCAAAATAAAGGGGTTGGGACTGTTATG	61
3	n108482	1	1	589	0	1441	0	0	No	NA	NA	NA	NA	CCACACATTCCAACCAGAAGAGAAAGTATGGCTATTTAGTTATGGTTCAGGAGCAGTAGGA	61	USA300HOU_RS14915;DBGWAS_general_tag=thiolase-like_protein
3	n110351	48	48	589	0	1441	0	0	No	NA	NA	NA	NA	TACTGGCCATTTTTCTAGTATTTATGCTCACTCTCTTCAAACGGTTCTGTTGCAAAGTTGAATTT	65	TCH1516intergenic_84981-86000
3	n111539	218	215	589	3	1441	0	0	No	0.00455795	0.189014	-0.0524381	-2.86022	TTATCATTGATATAGTCAATGAATAATGACAAATTATCACTCATAACAGTCCCAACCCCTTTATTTTGATA	71
3	n111574	1483	293	589	1190	1441	0	0	No	0.74096	0.999878	-0.00688859	0.330431	TATCAGTATTTATTATGCATTTAGAATATTAAAAT	35	TCH1516intergenic_7390-7915
3	n111882	217	214	589	3	1441	0	0	No	0.00425083	0.177591	-0.0519171	-2.88005	GATTATATTATCATTGATATAGTCAATGAATAATGAC	37
3	n112178	1	0	589	1	1441	0	0	No	NA	NA	NA	NA	ATTTTAATATTCTAAATGCATAATAAATACGGTTCTGTTGCAAAGTTGAATTTA	54	TCH1516intergenic_21070-21543
3	n113550	1	1	589	0	1441	0	0	No	NA	NA	NA	NA	ATATTTTTTTACTTTGCAACAGAACCTTATCATTGATATAGTCAATGAATAATGAC	56
3	n123687	1	1	589	0	1441	0	0	No	NA	NA	NA	NA	ACCTAGTGGATATTGTTGCTCAACATACTGCCGTCATTGTTCAATACCCTGATGATGATAA	61	USA300HOU_RS06965;DBGWAS_general_tag=glutamine_amidotransferase~~~SAOUHSC_01367;DBGWAS_general_tag=anthranilate_synthase_component_II
3	n123892	27	0	589	27	1441	0	0	No	NA	NA	NA	NA	ATTCTTTCATAGCAAACATTTCATTTAGCGGCATAAAAAATGGTTCCTCAATACTAGAAGA	61	USA300HOU_RS00135;DBGWAS_general_tag=hypothetical_protein
3	n124927	1	1	589	0	1441	0	0	No	NA	NA	NA	NA	CATATAACCTAGTGGATATTGTTGCTCAACTTACTGACGTCATTGTTCAATACCCTGATGA	61	USA300HOU_RS06965;DBGWAS_general_tag=glutamine_amidotransferase~~~SAOUHSC_01367;DBGWAS_general_tag=anthranilate_synthase_component_II
3	n125175	2026	586	589	1440	1441	0	0	No	NA	NA	NA	NA	TACTGACGTCATTGTTCAATACCCTGATGATGATAA	36	USA300HOU_RS06965;DBGWAS_general_tag=glutamine_amidotransferase~~~SAOUHSC_01367;DBGWAS_general_tag=anthranilate_synthase_component_II
3	n126843	208	205	589	3	1441	0	0	No	0.0327999	0.966856	-0.0341564	-2.15541	CATATAAAAATAAATTGAAGAGATTATTTTCGGTTCTGTTGCAAAGTAAAAAA	53
3	n127878	1100	37	589	1063	1441	0	0	No	0.654467	0.999878	-0.0073282	0.447406	CACCTTAAAAGTAGTTGCAGACGCACTTCCTAAATCGTCAGCAGTGTTTAACCACATATCATCAACAATAATCATATGA	79	USA300HOU_RS14825;DBGWAS_general_tag=hypothetical_protein
3	n129055	0	0	589	0	1441	0	0	No	NA	NA	NA	NA	TTCTGTTGCAAAGTAAAAAAATATAGCTAAGCACTAATCTATCATGTCAGTGTTCGGTTAA	61
3	n130512	15	0	589	15	1441	0	0	No	NA	NA	NA	NA	GCAATTAATTTAATAATTATAGCAAAATACAGGTTCTGTTGCAAAGTTGAATTTATA	57	USA300HOU_RS14940;DBGWAS_general_tag=hypothetical_protein
3	n134117	37	2	589	35	1441	0	0	No	NA	NA	NA	NA	TTCTGTTGCAAAGTAAAAAAATATAGCTAATCACTAATATATCAT	45
3	n134381	2	2	589	0	1441	0	0	No	NA	NA	NA	NA	AATTCAATCAAAGGCCCGATGACCAGAGTCAAAGCAATGAGAGGTTGATTTGGAAAAGCGG	61
3	n134382	1	1	589	0	1441	0	0	No	NA	NA	NA	NA	AATTCAATCAAAGGCCCGATGACCAGAGTCGAAGCAATGAGAGGTTGATTTGGAAAAGCGG	61
3	n134537	1	0	589	1	1441	0	0	No	NA	NA	NA	NA	GCAACAATATCCACTAGGTTATATGTAAAGAAATCATAATTATCTACAACTAAGATCATGG	61	USA300HOU_RS06965;DBGWAS_general_tag=glutamine_amidotransferase~~~SAOUHSC_01367;DBGWAS_general_tag=anthranilate_synthase_component_II
3	n134538	2025	587	589	1438	1441	0	0	No	NA	NA	NA	NA	GCAACAATATCCACTAGGTTATATGTAAAGGAATCATAAT	40	USA300HOU_RS06965;DBGWAS_general_tag=glutamine_amidotransferase~~~SAOUHSC_01367;DBGWAS_general_tag=anthranilate_synthase_component_II
3	n134539	1	1	589	0	1441	0	0	No	NA	NA	NA	NA	TTGAGCAACAATATCCACTAGGTTATATGTCCGTATTATGGAATAGAGATGTTGGTAACA	60	USA300HOU_RS14915;DBGWAS_general_tag=thiolase-like_protein~~~USA300HOU_RS06965;DBGWAS_general_tag=glutamine_amidotransferase~~~SAOUHSC_01367;DBGWAS_general_tag=anthranilate_synthase_component_II
3	n134838	1	1	589	0	1441	0	0	No	NA	NA	NA	NA	CACACACACATAGCCCCTTCATAACATGGTGTGGATACATTGTATTAATTAAGCTACGT	59	USA300HOU_RS06970;DBGWAS_general_tag=anthranilate_phosphoribosyltransferase~~~SAOUHSC_01368;DBGWAS_general_tag=anthranilate_phosphoribosyltransferase
3	n135069	2025	586	589	1439	1441	0	0	No	NA	NA	NA	NA	CATATAACCTAGTGGATATTGTTGCTCAACATACTG	36	USA300HOU_RS06965;DBGWAS_general_tag=glutamine_amidotransferase~~~SAOUHSC_01367;DBGWAS_general_tag=anthranilate_synthase_component_II
3	n138678	2026	587	589	1439	1441	0	0	No	NA	NA	NA	NA	ACATATAACCTAGTGGATATTGTTGCTCAAC	31	USA300HOU_RS06965;DBGWAS_general_tag=glutamine_amidotransferase~~~SAOUHSC_01367;DBGWAS_general_tag=anthranilate_synthase_component_II
3	n141830	1696	292	589	1404	1441	0	0	No	0.556315	0.999878	-0.00766967	0.588084	ATTAGTGGTTAGCTATATTTTTTTACTTTGCAA	33
3	n141871	1328	10	589	1318	1441	0	0	No	0.655273	0.999878	0.013636	-0.446628	TTATTCCAATTATCTAACAATGAAACATGGGAATGTGAAACACTGGAGGAAG	52	USA300HOU_RS00295;DBGWAS_general_tag=hypothetical_protein
3	n142647	2026	587	589	1439	1441	0	0	No	NA	NA	NA	NA	TTGAGCAACAATATCCACTAGGTTATATGTAAAG	34	USA300HOU_RS06965;DBGWAS_general_tag=glutamine_amidotransferase~~~SAOUHSC_01367;DBGWAS_general_tag=anthranilate_synthase_component_II
3	n142828	1	0	589	1	1441	0	0	No	NA	NA	NA	NA	AATTAACCCTTTAAGCCCATGTTTTTTATAAGTTCTGTTGCAAAGTAAAAAAATATAGCTA	61	TCH1516intergenic_76888-77075
3	n142893	1703	293	589	1410	1441	0	0	No	0.59645	0.999878	-0.00697428	0.529355	AGTGGTTAGCTATATTTTTTTACTTTGCAACAGAA	35
3	n143134	3	0	589	3	1441	0	0	No	NA	NA	NA	NA	CTATATTTTTTTACTTTGCAACAGAACCATGAAATTATTAAATGTGCAGAAAAATATC	58	USA300HOU_RS14865;DBGWAS_general_tag=Mph(C)_family_macrolide_2\'-phosphotransferase
3	n143767	1714	293	589	1421	1441	0	0	No	0.577178	0.999878	-0.00788038	0.557756	TAGCTATATTTTTTTACTTTGCAACAGAACC	31
3	n143867	1714	293	589	1421	1441	0	0	No	0.577178	0.999878	-0.00788038	0.557756	TTAGCTATATTTTTTTACTTTGCAACAGAAC	31
3	n147719	2	0	589	2	1441	0	0	No	NA	NA	NA	NA	AAATTCAACTTTGCAACAGAACCGTTTGAAACATTTAACGAAAGCATTTGATA	53
3	n148210	5	0	589	5	1441	0	0	No	NA	NA	NA	NA	TATCAAATGCTTTAGTTAGATGCTTCAAACGGTTCTGTTGCAAAGTAAAAAA	52	USA300HOU_RS14890;DBGWAS_general_tag=replication_protein
3	n149032	1	0	589	1	1441	0	0	No	NA	NA	NA	NA	ATGACTCGCTTATTCCAATTATCTAACAATAAAACATGGGAATGTGAAACACTGGAGGAAG	61	USA300HOU_RS00295;DBGWAS_general_tag=hypothetical_protein
3	n150414	1326	7	589	1319	1441	0	0	No	0.987251	0.999878	0.000624342	-0.0161009	GTAATACTATATAAATTAACCCTTTAAGCCCATGTTTTTTATA	43	TCH1516intergenic_76888-77075
3	n152783	1	0	589	1	1441	0	0	No	NA	NA	NA	NA	CACATAAGATTGCTAAAAGAAGTTCTGTCCATACAGGTCTATTTTCCACTGACTTTCCCG	60	USA300HOU_RS14870;DBGWAS_general_tag=recombinase_family_protein~~~USA300HOU_RS00335;DBGWAS_general_tag=universal_stress_protein
3	n153589	1	0	589	1	1441	0	0	No	NA	NA	NA	NA	CTATATTTTTTTACTTTGCAACAGAACCTGTAGCACTTACTTTATGGCCTAAGCGCTT	58	USA300HOU_RS14840;DBGWAS_general_tag=hypothetical_protein
3	n154585	40	38	589	2	1441	0	0	No	NA	NA	NA	NA	TATAAATTCAACTTTGCAACAGAACCGTTTGAA	33	TCH1516intergenic_21070-21543
3	n155861	2	0	589	2	1441	0	0	No	NA	NA	NA	NA	ATATTTTTTTACTTTGCAACAGAACCGTTTGAAG	34
3	n156595	3	3	589	0	1441	0	0	No	NA	NA	NA	NA	ATTAAATATGAATTACTTAGTTCCTATTCGAAGCGAGAAATCCAACAACAAGAATTAACAT	61	USA300HOU_RS06970;DBGWAS_general_tag=anthranilate_phosphoribosyltransferase~~~SAOUHSC_01368;DBGWAS_general_tag=anthranilate_phosphoribosyltransferase
3	n159006	1615	231	589	1384	1441	0	0	No	0.840091	0.999878	0.00479783	-0.201701	ATCTATAAAATAAAATTGTGGTTCTTTACCGGAAACATTAAATA	44	USA300HOU_RS00135;DBGWAS_general_tag=hypothetical_protein
3	n161209	1	1	589	0	1441	0	0	No	NA	NA	NA	NA	TAAATTCAACTTTGCAACAGAACCGTATTAATTAAGCTACGTACAATATATGTT	54	TCH1516intergenic_21070-21543~~~USA300HOU_RS06970;DBGWAS_general_tag=anthranilate_phosphoribosyltransferase~~~SAOUHSC_01368;DBGWAS_general_tag=anthranilate_phosphoribosyltransferase
3	n161210	1585	232	589	1353	1441	0	0	No	0.0723771	0.999878	0.0228199	-1.79667	TAAATTCAACTTTGCAACAGAACCGTATTATGG	33	USA300HOU_RS14915;DBGWAS_general_tag=thiolase-like_protein~~~TCH1516intergenic_21070-21543
3	n163105	1596	233	589	1363	1441	0	0	No	0.0060376	0.2411	0.0419672	-2.74974	ATTCAACTTTGCAACAGAACCGTATTATGGAATAGAGATGTTGGTAACA	49	USA300HOU_RS14915;DBGWAS_general_tag=thiolase-like_protein
3	n167745	1585	233	589	1352	1441	0	0	No	0.0910141	0.999878	0.0212118	-1.68997	ATAAATTCAACTTTGCAACAGAACCGTATTA	31	TCH1516intergenic_21070-21543
3	n167778	3	0	589	3	1441	0	0	No	NA	NA	NA	NA	CCATAATACGGTTCTGTTGCAAAGTTGAATCTATAGTAT	39	USA300HOU_RS14915;DBGWAS_general_tag=thiolase-like_protein
3	n172462	5	0	589	5	1441	0	0	No	NA	NA	NA	NA	CGAAAATCAAGATAATAAAACGTTAAAAGAGGTTCTGTTGCAAAGTAAAAAAATAT	56
3	n172482	1	0	589	1	1441	0	0	No	NA	NA	NA	NA	TTGTAAAATCATTAATGACAGAGTAATCAGGGTTCTGTTGCAAAGTAAAAAAATATA	57
3	n172869	1145	68	589	1077	1441	0	0	No	0.989923	0.999878	0.0003069	-0.0126588	TGAAAAGATTATCGAGCTGTATGCGGAGTGCATCAGGCTCTTTCACTCCAT	51	USA300HOU_RS14800;DBGWAS_general_tag=aminoglycoside_O-phosphotransferase_APH(3\')-IIIa
3	n173834	1617	231	589	1386	1441	0	0	No	0.889231	0.999878	0.00371267	-0.139075	ATCATTTTTCGCCAAAAACTTTATACTGAATAGCTTCTACATTAAATACTTTGTCAATGAGATCATCTACATCTTTAAATTCAGAATAATTTGCATATGGATCTATAAAATAAAATTGTGGTTCTTTACC	130	USA300HOU_RS00135;DBGWAS_general_tag=hypothetical_protein
3	n174740	1	0	589	1	1441	0	0	No	NA	NA	NA	NA	TTCGGGAAATGCTTTTTACATACTGATTACGGTTCTGTTGCAAAGTTGAATTTATA	56	TCH1516intergenic_21070-21543
3	n179039	1	1	589	0	1441	0	0	No	NA	NA	NA	NA	TATTCTTTCATAGCAAACATTTCATTTAGCCACATAAAAAATGGTTCCTCAATACTAGAAG	61	USA300HOU_RS00135;DBGWAS_general_tag=hypothetical_protein
3	n179509	12	12	589	0	1441	0	0	No	NA	NA	NA	NA	TATATTTTTTTACTTTGCAACAGAACCCTGTAGCGCTACCACTACCAAATCTTAAAT	57
3	n181513	2029	588	589	1441	1441	0	0	No	NA	NA	NA	NA	CATTCGGGAAATGCTTTTTACATACTGATTAC	32	TCH1516intergenic_2334995-2335031~~~NCTC8325intergenic_2281629-2281665
3	n182302	1143	68	589	1075	1441	0	0	No	0.84337	0.999878	-0.00407198	0.197511	GCGGATCTTTAAATGGAGTGTCTTCTTCCCAGTTTTCGCAATCCACATCGGC	52	USA300HOU_RS14800;DBGWAS_general_tag=aminoglycoside_O-phosphotransferase_APH(3\')-IIIa
3	n183632	2	2	589	0	1441	0	0	No	NA	NA	NA	NA	TTGTTGAAAGTGTTAAAAACAACCAACGTGATTTTGGCTTTTCCTTAATTACTTCTTCAAT	61	USA300HOU_RS14890;DBGWAS_general_tag=replication_protein
3	n184106	35	34	589	1	1441	0	0	No	NA	NA	NA	NA	TCAAGCTCAAAAAGTGATTGAAGAAGTAATTAAGGAAAAGCCAAAA	46
3	n188725	13	1	589	12	1441	0	0	No	NA	NA	NA	NA	TATTTCTTCAATTGACAATATTAAATTATCCTTAGATTCTATATCAGATAT	51
3	n189626	1	0	589	1	1441	0	0	No	NA	NA	NA	NA	TAGTCATTTTTACGAATAAAGACAATAAAATGATAGCCAAATGATAAGTGATAAGTGAAACGCCAAGAGTGTAATGAAGGAATTTTAATA	90	USA300HOU_RS14765;DBGWAS_general_tag=penicillin-hydrolyzing_class_A_beta-lactamase_BlaZ
3	n191419	24	24	589	0	1441	0	0	No	NA	NA	NA	NA	CAACAGAACCGTATATTTTATATAGAGCATTCTCACTAAA	40	USA300HOU_RS00165;DBGWAS_general_tag=beta-lactam_sensor/signal_transducer_MecR1
3	n191420	1	0	589	1	1441	0	0	No	NA	NA	NA	NA	ATATTTTTTTACTTTGCAACAGAACCGTATATTTTTATTAGATCACAATTTTATTTTAG	59	TCH1516intergenic_35769-35876
3	n191667	1491	300	589	1191	1441	0	0	No	0.840076	0.999878	-0.00433654	0.201594	TATTAAAATTCCTTCATTACACTCTTGGCGGTTTCACTTATCAACTTATCATTTGGCTTATCACTTTTATTGTCTTTATTCGTAAAA	87	USA300HOU_RS14765;DBGWAS_general_tag=penicillin-hydrolyzing_class_A_beta-lactamase_BlaZ
3	n193392	1173	44	589	1129	1441	0	0	No	0.758624	0.999878	0.00636193	-0.307154	ATTTTAAAACACCTTATTAGTAAAACAATTAC	32	TCH1516intergenic_25102-25347
3	n196333	1103	5	589	1098	1441	0	0	No	0.383781	0.999878	0.00744491	-0.87065	TTTTGTTAAAATTATACTATAGATTCAACTTTGCAACAGAACC	43	TCH1516intergenic_76171-76214
3	n197567	1185	60	589	1125	1441	0	0	No	0.241692	0.999878	0.0244003	-1.17047	TTGAAATACAGGTCTATTTTCCACTGACTTTCCCG	35	USA300HOU_RS14870;DBGWAS_general_tag=recombinase_family_protein
3	n198798	1	0	589	1	1441	0	0	No	NA	NA	NA	NA	AAGTTTATTAGATAAAGGTAAAGTCATAAAGTGTAATCAATGTGAACAAATATTCTTTAAA	61
3	n200562	3	0	589	3	1441	0	0	No	NA	NA	NA	NA	AGTTGAATCTATAGTATAATTTTAACAAAAGGAGTCTTC	39	TCH1516intergenic_76171-76214
3	n201383	10	10	589	0	1441	0	0	No	NA	NA	NA	NA	TTGCATTCCTCTATTAACCAGTGTTATAATGTGATTAACAAGAATTCTAGCGTGAATACAC	61
3	n201526	1	0	589	1	1441	0	0	No	NA	NA	NA	NA	TTCTTCCCAGTTTTCGCAATCCACATCGGCAAGATCGTTATTCAGTAAGTAATCCAATTCG	61	USA300HOU_RS14800;DBGWAS_general_tag=aminoglycoside_O-phosphotransferase_APH(3\')-IIIa
3	n203793	1101	5	589	1096	1441	0	0	No	0.456858	0.999878	0.00629977	-0.743718	ATACTATAGATTCAACTTTGCAACAGAACCT	31
3	n204424	1144	67	589	1077	1441	0	0	No	0.892787	0.999878	-0.00321762	0.13474	AGATCGTTATTCAGTAAGTAATCCAATTCGGCTAAGCGGCTG	42	USA300HOU_RS14800;DBGWAS_general_tag=aminoglycoside_O-phosphotransferase_APH(3\')-IIIa
3	n205346	1094	5	589	1089	1441	0	0	No	0.397078	0.999878	0.00708838	-0.846583	AGTTGAATCTATAGTATAATTTTAACAAAAA	31	TCH1516intergenic_76171-76214
3	n205570	1143	67	589	1076	1441	0	0	No	0.968739	0.999878	0.000889647	-0.039185	CGGCCAGATCGTTATTCAGTAAGTAATCCAATTCG	35	USA300HOU_RS14800;DBGWAS_general_tag=aminoglycoside_O-phosphotransferase_APH(3\')-IIIa
3	n206304	211	208	589	3	1441	0	0	Yes	0.000424805	0.023396	-0.0674174	-3.55708	AATATCGACAAATTAAAAAACAATAAAATTACTTGAATATTATTCATAATAT	52
3	n206383	1	1	589	0	1441	0	0	No	NA	NA	NA	NA	GTCATTTTTAAAAAATATAGGCAAAAAATTGATAAAGTCCGTATAATTGTGTA	53	TCH1516intergenic_1908934-1909193~~~NCTC8325intergenic_1811875-1812134
3	n206716	3	3	589	0	1441	0	0	No	NA	NA	NA	NA	AAAAATTGATAAAGTCCGTATAATTGTGTAA	31
3	n207130	1	0	589	1	1441	0	0	No	NA	NA	NA	NA	GCCGATGTGGATTGCGAAAACTGGGAAGAATACACTCCATTTAAAGA	47	USA300HOU_RS14800;DBGWAS_general_tag=aminoglycoside_O-phosphotransferase_APH(3\')-IIIa
3	n207527	9	9	589	0	1441	0	0	No	NA	NA	NA	NA	AAAATTGATAAAGTCCGTATAATTGTGTAAA	31
3	n207996	8	8	589	0	1441	0	0	No	NA	NA	NA	NA	AATATCGACAAATTAAAAAACAATAAAATTGATAAAGTCCGTATAATTGTGTAA	54
3	n209220	25	25	589	0	1441	0	0	No	NA	NA	NA	NA	AAATTGATAAAGTCCGTATAATTGTGTAAAA	31
3	n209385	3	3	589	0	1441	0	0	No	NA	NA	NA	NA	GCTAAATGAAATGTTTGCTATGAAAGAATAGGTTCTGTTGCAAAGTAAAAAAATAT	56	USA300HOU_RS00135;DBGWAS_general_tag=hypothetical_protein
3	n209409	1	0	589	1	1441	0	0	No	NA	NA	NA	NA	TCTTTAAATGGAGTGTATTCTTCCCAGTTTCGCAATCCACATCGGCCAGATCGTTAT	57	USA300HOU_RS14800;DBGWAS_general_tag=aminoglycoside_O-phosphotransferase_APH(3\')-IIIa
3	n211678	2	2	589	0	1441	0	0	No	NA	NA	NA	NA	TACACAATTATACGGACTTTATCAATTTTTCATTGACAATTTTTTATATTAAA	53	TCH1516intergenic_1340168-1340868~~~NCTC8325intergenic_1246251-1246951
3	n211786	14	14	589	0	1441	0	0	No	NA	NA	NA	NA	TGGGGATATCCATACTTACTAATTATGGTTGGTTCTGTTGCAAAGTAAAAAAATATAG	58
3	n212082	42	41	589	1	1441	0	0	No	NA	NA	NA	NA	AATTGATAAAGTCCGTATAATTGTGTAAAAG	31
3	n214314	3	3	589	0	1441	0	0	No	NA	NA	NA	NA	TACTATAAATTCAACTTTGCAACAGAACCGGATAACGACTATTTAATTAATCAAAAAGTGTTCGA	65	TCH1516intergenic_12245-12506
3	n214835	1	0	589	1	1441	0	0	No	NA	NA	NA	NA	AAACACTGGAGGAAGCGGCAGAAAATATTCGGTTCTGTTGCAAAGTAAAAAAATAT	56	USA300HOU_RS00295;DBGWAS_general_tag=hypothetical_protein
3	n215472	5	1	589	4	1441	0	0	No	NA	NA	NA	NA	ATTCGGTTCTGTTGCAAAGTAAAAAAATATA	31
3	n216823	16	16	589	0	1441	0	0	No	NA	NA	NA	NA	TAAATTGATAAAGTCCGTATAATTGTGTAAA	31
3	n218420	37	5	589	32	1441	0	0	No	NA	NA	NA	NA	CCCAATTCCACATTGCAATAATAGAAAATCGGTTCTGTTGCAAAGTTGAATTTAT	55
3	n219003	1611	235	589	1376	1441	0	0	No	0.596391	0.999878	-0.0107608	0.529365	AAACACTTAAATATGCTAGAATCTAGAGAGCAATTATCAGTCGAAGAATACGAAACATTCT	61	USA300HOU_RS14915;DBGWAS_general_tag=thiolase-like_protein
3	n219004	1	0	589	1	1441	0	0	No	NA	NA	NA	NA	AAACACTTAAATATGCTAGAATCTAGAGAGTAATTATCAGTCGAAGAATACGAAACATTCT	61	USA300HOU_RS14915;DBGWAS_general_tag=thiolase-like_protein
3	n219005	2	2	589	0	1441	0	0	No	NA	NA	NA	NA	AAACACTTAAATATGCTAGAATCTAGAGAGGAATTATCAGTCGAAGAATACGAAACATTCT	61	USA300HOU_RS14915;DBGWAS_general_tag=thiolase-like_protein
3	n219137	1	1	589	0	1441	0	0	No	NA	NA	NA	NA	AACTGCAGAAGGCAAACCGAGTTTTTTATCGGTTCTGTTGCAAAGTAAAAAAATA	55
3	n219844	41	9	589	32	1441	0	0	No	NA	NA	NA	NA	AAATCGGTTCTGTTGCAAAGTTGAATTTATA	31
3	n220475	1614	237	589	1377	1441	0	0	No	0.417413	0.999878	-0.018483	0.810822	AGGATATGACAAAGCATTAGATAAAGAGAAACACTTAAATATGCTAGAATCTAGAGAG	58	USA300HOU_RS14915;DBGWAS_general_tag=thiolase-like_protein
3	n222387	21	20	589	1	1441	0	0	No	NA	NA	NA	NA	TAATCGGTTCTGTTGCAAAGTAAAAAAATATA	32
3	n222389	44	10	589	34	1441	0	0	No	NA	NA	NA	NA	AATCGGTTCTGTTGCAAAGTTGAATTTATAG	31
3	n222411	2026	586	589	1440	1441	0	0	No	NA	NA	NA	NA	ACGTAGCTTAATTAATACAATGTATCCACATCAACCATGT	40	USA300HOU_RS06970;DBGWAS_general_tag=anthranilate_phosphoribosyltransferase~~~SAOUHSC_01368;DBGWAS_general_tag=anthranilate_phosphoribosyltransferase
3	n225246	1	0	589	1	1441	0	0	No	NA	NA	NA	NA	GTTCATACAGAAGACTCCTTTTTGTTAAAAATATATTATAAATTCAACTTTGCAACAGAAC	61	TCH1516intergenic_21070-21543
3	n225393	4	1	589	3	1441	0	0	No	NA	NA	NA	NA	TATATTTTTTTACTTTGCAACAGAACCGATAA	32
3	n225819	24	20	589	4	1441	0	0	No	NA	NA	NA	NA	ATCGGTTCTGTTGCAAAGTAAAAAAATATAG	31
3	n225881	3	0	589	3	1441	0	0	No	NA	NA	NA	NA	TATTTCTTCAATTGACAATATTAAATTATCGGTTCTGTTGCAAAGTAAAAAAATA	55
3	n226739	1	0	589	1	1441	0	0	No	NA	NA	NA	NA	CAACATAATATTAATTTAGTTACTTCAATCGGTTCTGTTGCAAAGTTGAATTTATA	56	TCH1516intergenic_2445641-2446127~~~NCTC8325intergenic_2392289-2392775
3	n227270	2027	587	589	1440	1441	0	0	No	NA	NA	NA	NA	AACATATATTGTACGTAGCTTAATTAATACAATGTATCCACA	42	USA300HOU_RS06970;DBGWAS_general_tag=anthranilate_phosphoribosyltransferase~~~SAOUHSC_01368;DBGWAS_general_tag=anthranilate_phosphoribosyltransferase
3	n227272	2	1	589	1	1441	0	0	No	NA	NA	NA	NA	TATAAATTCAACTTTGCAACAGAACCGATTCA	32
3	n229839	1609	234	589	1375	1441	0	0	Yes	0.000320257	0.0179556	0.0678213	-3.61232	TCCTACTGCTCCTGAACCATAACTAAATAGACATACTTTCTCTTCTGGTTGGAATGTGTGG	61	USA300HOU_RS14915;DBGWAS_general_tag=thiolase-like_protein
3	n230162	4	4	589	0	1441	0	0	No	NA	NA	NA	NA	ATAAATTCAACTTTGCAACAGAACCGATTTATCGTTGCCACTATCTTCTGCTGGG	55
3	n230466	1616	230	589	1386	1441	0	0	No	0.988044	0.999878	0.000372552	-0.0148702	AATGAAATGTTTGCTATGAAAGAATATAAGCAGAAA	36	USA300HOU_RS00135;DBGWAS_general_tag=hypothetical_protein
3	n233803	1092	37	589	1055	1441	0	0	No	0.807944	0.999878	-0.00340541	0.242965	TAATACAGTTAGGAGGTTCTGTTGCAAAGTTGAATTTA	38	USA300HOU_RS14825;DBGWAS_general_tag=hypothetical_protein
3	n234130	4	0	589	4	1441	0	0	No	NA	NA	NA	NA	ATAAATTCAACTTTGCAACAGAACCGTTTATCACCTTTTGCTTGGCTTTGATAAC	55
3	n237000	1655	267	589	1388	1441	0	0	No	0.676786	0.999878	0.0140272	-0.416535	GTATATTTTATATAGAGCATTCTCACTAAAAA	32	USA300HOU_RS00165;DBGWAS_general_tag=beta-lactam_sensor/signal_transducer_MecR1
3	n238397	2024	583	589	1441	1441	0	0	No	NA	NA	NA	NA	ATAAATTAGGATATTTATTTCAAAATTATGGATTAATCGATAATTTGACAGTAAA	55	USA300HOU_RS05135;DBGWAS_general_tag=ABC_transporter_ATP-binding_protein~~~SAOUHSC_00970;DBGWAS_general_tag=ABC_transporter_ATP-binding_protein
3	n242955	1171	81	589	1090	1441	0	0	No	0.755637	0.999878	-0.00521403	0.311067	GGGTTTTAAGTTATTTTAAAGTGATATCATACAAAGCTGTA	41	USA300HOU_RS15665;DBGWAS_general_tag=hypothetical_protein~~~TCH1516intergenic_1524-2387
3	n243068	888	37	589	851	1441	0	0	No	0.899179	0.999878	0.0019062	0.12668	ATTCCAGGGGTTTTAAGGTATTTTAAAGTGATATCATACAAAGCTGTA	48	USA300HOU_RS15665;DBGWAS_general_tag=hypothetical_protein~~~TCH1516intergenic_1524-2387
3	n246587	890	37	589	853	1441	0	0	No	0.805685	0.999878	0.00363889	0.245956	TATTTTAAAGTGATATCATACAAAGCTGTAC	31	USA300HOU_RS15665;DBGWAS_general_tag=hypothetical_protein~~~TCH1516intergenic_1524-2387
3	n249303	20	20	589	0	1441	0	0	No	NA	NA	NA	NA	GCATTGTATGCCCAATAAATGAATTTTAGGGGTTCTGTTGCAAAGTAAAAAA	52
3	n251166	215	212	589	3	1441	0	0	No	0.00994943	0.370401	-0.0457122	-2.59897	TAGATATTACAATCATTGAGTCACAGGATTCATATAAAAATAAATTGAAGAGATTATTTT	60
3	n253212	226	223	589	3	1441	0	0	No	0.00175047	0.0822553	-0.06052	-3.16592	TAAACAAGCCTTAAAATATTTAACTTTTTTGTGATTATTACACATTATCTTATC	54
3	n253320	12	5	589	7	1441	0	0	No	NA	NA	NA	NA	TAACTGGTTCTGTTGCAAAGTAAAAAAATATAG	33
3	n256366	3	0	589	3	1441	0	0	No	NA	NA	NA	NA	GGAGAAAAATTAGCGCTAAATTACTTTAATAAGCTAATTGATAATAAAATAGACGAAGATA	61	USA300HOU_RS00135;DBGWAS_general_tag=hypothetical_protein
3	n259104	1310	7	589	1303	1441	0	0	No	0.802966	0.999878	-0.00431647	0.249282	CTAACACAAAGGCAATTAATTTAATAATTATAGCAAAATA	40	USA300HOU_RS14940;DBGWAS_general_tag=hypothetical_protein
3	n260832	1052	247	589	805	1441	0	0	No	0.938911	0.999878	0.000689023	-0.0766886	AGCAATGGCTAAAGTAATTAAAGCTTTTAAACTTAA	36	USA300HOU_RS14945;DBGWAS_general_tag=IS6_family_transposase~~~USA300HOU_RS00140;DBGWAS_general_tag=IS6_family_transposase_IS431mec
3	n262733	1143	67	589	1076	1441	0	0	Yes	8.65476e-05	0.00524015	0.0873959	-3.94823	ATATGTCGATGGAGTGAAAGAGCCTGATGCACTCCGCA	38	USA300HOU_RS14800;DBGWAS_general_tag=aminoglycoside_O-phosphotransferase_APH(3\')-IIIa
3	n264364	1060	248	589	812	1441	0	0	No	0.814684	0.999878	0.00210054	-0.234464	TTTAAGTTTAAAAGCTTTAATTACTTTAGCC	31	USA300HOU_RS14945;DBGWAS_general_tag=IS6_family_transposase~~~USA300HOU_RS00140;DBGWAS_general_tag=IS6_family_transposase_IS431mec~~~USA300HOU_RS14820;DBGWAS_general_tag=IS6_family_transposase~~~USA300HOU_RS14790;DBGWAS_general_tag=IS6-like_element_IS257_family_transposase
3	n264480	1073	252	589	821	1441	0	0	No	0.213646	0.999878	-0.0109216	1.24349	GCTAAAGTAATTAAAGCTTTTAAACTTAAAC	31	USA300HOU_RS14945;DBGWAS_general_tag=IS6_family_transposase~~~USA300HOU_RS00140;DBGWAS_general_tag=IS6_family_transposase_IS431mec~~~USA300HOU_RS14820;DBGWAS_general_tag=IS6_family_transposase~~~USA300HOU_RS14790;DBGWAS_general_tag=IS6-like_element_IS257_family_transposase
3	n266664	0	0	589	0	1441	0	0	No	NA	NA	NA	NA	ACGAAATTAGCATCATGCTAGCAAGTTAACCGAACACTGACATGATAGATTAGTG	55	USA300HOU_RS14945;DBGWAS_general_tag=IS6_family_transposase~~~USA300HOU_RS00140;DBGWAS_general_tag=IS6_family_transposase_IS431mec~~~USA300HOU_RS14820;DBGWAS_general_tag=IS6_family_transposase~~~USA300HOU_RS14790;DBGWAS_general_tag=IS6-like_element_IS257_family_transposase~~~USA300HOU_RS14855;DBGWAS_general_tag=IS6_family_transposase
3	n266751	1	1	589	0	1441	0	0	No	NA	NA	NA	NA	GGAACCATTTTTTATGTCGCTAAATGAAATTTTTGCTATGAAAGAATATAAGCAGAAATAT	61	USA300HOU_RS00135;DBGWAS_general_tag=hypothetical_protein
3	n266852	1398	209	589	1189	1441	0	0	No	0.858672	0.999878	0.00357951	-0.178435	AATATTCTAAATGCATAATAAATACTGATAACATCTTATA	40	TCH1516intergenic_7390-7915
3	n267638	1	0	589	1	1441	0	0	No	NA	NA	NA	NA	CTTTGCAACAGAACCTCCTAACTGTATTACACCTTAAAAGTAGTTGCAGACGCACTTCC	59	USA300HOU_RS14825;DBGWAS_general_tag=hypothetical_protein
3	n267639	1091	37	589	1054	1441	0	0	No	0.818485	0.999878	-0.00332774	0.229384	CTTTGCAACAGAACCTCCTAACTGTATTACCACCTTAAAAGTAGT	45	USA300HOU_RS14825;DBGWAS_general_tag=hypothetical_protein
3	n267640	1	0	589	1	1441	0	0	No	NA	NA	NA	NA	ACTTTGCAACAGAACCTCCTAACTGTATTATGGAATAGAGATGTTGGTAACATT	54	USA300HOU_RS14915;DBGWAS_general_tag=thiolase-like_protein~~~USA300HOU_RS14825;DBGWAS_general_tag=hypothetical_protein
3	n267837	1100	37	589	1063	1441	0	0	No	0.703467	0.999878	-0.00596519	0.380479	GGAAGTGCGTCTGCAACTACTTTTAAGGTGGTAATACAGTTAGGA	45	USA300HOU_RS14825;DBGWAS_general_tag=hypothetical_protein
3	n270495	1090	37	589	1053	1441	0	0	No	0.807365	0.999878	-0.00353243	0.243717	ACTTTGCAACAGAACCTCCTAACTGTATTAC	31	USA300HOU_RS14825;DBGWAS_general_tag=hypothetical_protein
3	n273182	1	0	589	1	1441	0	0	No	NA	NA	NA	NA	CAAAAACTATTCTGAAAATGAACAACAGGAGGTTCTGTTGCAAAGTTGAATTTATA	56	TCH1516intergenic_12245-12506~~~USA300HOU_RS14825;DBGWAS_general_tag=hypothetical_protein~~~USA300HOU_RS04490;DBGWAS_general_tag=hypothetical_protein
3	n274626	2	1	589	1	1441	0	0	No	NA	NA	NA	NA	TAAATATAATTTTAACAAAAAGGAGTCTTCTG	32	TCH1516intergenic_12245-12506~~~TCH1516intergenic_21070-21543~~~TCH1516intergenic_76171-76214~~~TCH1516intergenic_36551-36586
3	n276279	1292	86	589	1206	1441	0	0	No	0.183785	0.999878	0.0153988	-1.32882	AATATAATTTTAACAAAAAGGAGTCTTCTGTA	32	TCH1516intergenic_12245-12506~~~TCH1516intergenic_21070-21543~~~TCH1516intergenic_76171-76214~~~TCH1516intergenic_36551-36586
3	n277121	1614	237	589	1377	1441	0	0	No	0.417413	0.999878	-0.018483	0.810822	AATTATCAGTCGAAGAATACGAAACATTCTTTAACAGATTTGATAATCAAGAATTTGATTTCGAACGTGAATTGACACAA	80	USA300HOU_RS14915;DBGWAS_general_tag=thiolase-like_protein
3	n280608	2	0	589	2	1441	0	0	No	NA	NA	NA	NA	AAAAAACGGTTCTGTTGCAAAGTAAAAAAAT	31
3	n280778	13	0	589	13	1441	0	0	No	NA	NA	NA	NA	AAAAACGGTTCTGTTGCAAAGTAAAAAAATAT	32
3	n280779	10	8	589	2	1441	0	0	No	NA	NA	NA	NA	AAAAACGGTTCTGTTGCAAAGTTGAATTTATA	32	TCH1516intergenic_21070-21543
3	n281243	3	0	589	3	1441	0	0	No	NA	NA	NA	NA	AAAATACGGTTCTGTTGCAAAGTAAAAAAATAT	33
3	n281244	1162	48	589	1114	1441	0	0	No	0.806088	0.999878	0.00309406	-0.245338	AAAATACGGTTCTGTTGCAAAGTTGAATTTA	31	TCH1516intergenic_21070-21543
3	n281467	1	0	589	1	1441	0	0	No	NA	NA	NA	NA	ATGTAAACAAAATGATTCCAGGATATTTATCCATAAACATTTCTAATGCTTCTAATGTTTT	61	USA300HOU_RS14860;DBGWAS_general_tag=ABC-F_type_ribosomal_protection_protein_Msr(A)
3	n282001	1	0	589	1	1441	0	0	No	NA	NA	NA	NA	TTAAAGAAACGATTAATATAATGTTGAATCGGTTCTGTTGCAAAGTTGAATTTA	54	TCH1516intergenic_12245-12506
3	n282051	16	0	589	16	1441	0	0	No	NA	NA	NA	NA	AAACGGTTCTGTTGCAAAGTAAAAAAATATAG	32
3	n282053	1	0	589	1	1441	0	0	No	NA	NA	NA	NA	AAACGGTTCTGTTGCAAAGTTGAATTTATAAT	32	TCH1516intergenic_21070-21543
3	n282054	53	46	589	7	1441	0	0	No	NA	NA	NA	NA	AAACGGTTCTGTTGCAAAGTTGAATTTATAGT	32	TCH1516intergenic_12245-12506~~~TCH1516intergenic_21070-21543
3	n282160	1163	48	589	1115	1441	0	0	No	0.789497	0.999878	0.00334317	-0.266817	AAATACGGTTCTGTTGCAAAGTTGAATTTAT	31	TCH1516intergenic_21070-21543
3	n282469	1153	48	589	1105	1441	0	0	No	0.810359	0.999878	0.00350727	-0.239845	AAATTCAACTTTGCAACAGAACCGTATTTTATGAGTA	37	TCH1516intergenic_21070-21543
3	n282470	11	0	589	11	1441	0	0	No	NA	NA	NA	NA	AAATTCAACTTTGCAACAGAACCGTATTTTGCTATAATTATTAAATTAATTGC	53	TCH1516intergenic_21070-21543~~~USA300HOU_RS14940;DBGWAS_general_tag=hypothetical_protein
3	n282471	1	0	589	1	1441	0	0	No	NA	NA	NA	NA	ATAAATTCAACTTTGCAACAGAACCGTTTAAAGCATATGTCTAAGGCTTTTAATA	55
3	n283334	3	3	589	0	1441	0	0	No	NA	NA	NA	NA	TTTTTTTACTTTGCAACAGAACCGATTATAAAGTGCCCGTACACTTATATGA	52
3	n283335	1	1	589	0	1441	0	0	No	NA	NA	NA	NA	TTTTTTTACTTTGCAACAGAACCGATTATATTATCATTGATATAGTCAATGAA	53
3	n283758	11	0	589	11	1441	0	0	No	NA	NA	NA	NA	AATAAAAACGGTTCTGTTGCAAAGTAAAAAAAT	33
3	n283894	1660	246	589	1414	1441	0	0	Yes	1.64795e-05	0.00106937	0.0597705	-4.31938	AATACGGTTCTGTTGCAAAGTTGAATTTATA	31	TCH1516intergenic_21070-21543
3	n285730	1	0	589	1	1441	0	0	No	NA	NA	NA	NA	TACTCATAAAATACGGTTCTGTTGCAAAGTAAAAAAA	37	TCH1516intergenic_21070-21543
3	n285846	1153	48	589	1105	1441	0	0	No	0.747648	0.999878	0.00483516	-0.321584	ACTTTGCAACAGAACCGTATTTTATGAGTACA	32	TCH1516intergenic_21070-21543
3	n286103	4	4	589	0	1441	0	0	No	NA	NA	NA	NA	TATAATCGGTTCTGTTGCAAAGTAAAAAAATA	32
3	n287669	4	0	589	4	1441	0	0	No	NA	NA	NA	NA	TAAACGGTTCTGTTGCAAAGTTGAATTTATA	31	TCH1516intergenic_21070-21543
3	n287674	3	1	589	2	1441	0	0	No	NA	NA	NA	NA	TAAATTCAACTTTGCAACAGAACCGTTTTTC	31
3	n287840	1152	48	589	1104	1441	0	0	No	0.790282	0.999878	0.00391607	-0.26581	TTTGCAACAGAACCGTATTTTATGAGTACAC	31	TCH1516intergenic_21070-21543
3	n292708	2024	585	589	1439	1441	0	0	No	NA	NA	NA	NA	ACCTAGTGGATATTGTTGCTCAACATACTGA	31	USA300HOU_RS06965;DBGWAS_general_tag=glutamine_amidotransferase~~~SAOUHSC_01367;DBGWAS_general_tag=anthranilate_synthase_component_II
3	n292714	4	2	589	2	1441	0	0	No	NA	NA	NA	NA	ATATTTTTTTACTTTGCAACAGAACCTCTTCTTCTATGCAAATGCTTTTAATCCG	55	TCH1516intergenic_13181-13349
3	n295727	23	23	589	0	1441	0	0	No	NA	NA	NA	NA	ATGCTCTATATAAAATATACGGTTCTGTTGCAAAGTTGAATTTA	44	TCH1516intergenic_21070-21543
3	n295728	1	1	589	0	1441	0	0	No	NA	NA	NA	NA	ATGCTCTATATAAAATATACGGTTCTGTTGGTTGAATTTATAGTATAATTATAACCAAAA	60
3	n296798	1	1	589	0	1441	0	0	No	NA	NA	NA	NA	TAAATTCAACTTTGCAACAGAACCGTATATCCAATATCAAATTCTCTATCTCCA	54	TCH1516intergenic_21070-21543
3	n297788	2022	582	589	1440	1441	0	0	No	NA	NA	NA	NA	AACTGATATTAAATATGAATTACTTAGTTCCTATTCG	37	USA300HOU_RS06970;DBGWAS_general_tag=anthranilate_phosphoribosyltransferase~~~SAOUHSC_01368;DBGWAS_general_tag=anthranilate_phosphoribosyltransferase
3	n300082	24	24	589	0	1441	0	0	No	NA	NA	NA	NA	TATAAATTCAACTTTGCAACAGAACCGTATAT	32	TCH1516intergenic_21070-21543
3	n302056	1247	59	589	1188	1441	0	0	No	0.454835	0.999878	0.00865203	-0.747125	AAAAAATATAGCTAATCACTAATATATCATG	31	TCH1516intergenic_16282-16386~~~TCH1516intergenic_20326-20395
3	n302941	1617	231	589	1386	1441	0	0	No	0.889231	0.999878	0.00371267	-0.139075	GAAACATTAAATATTCTTAATATTAAATATTTCTGCTTATATTCTTTCATAGCAAA	56	USA300HOU_RS00135;DBGWAS_general_tag=hypothetical_protein
3	n303840	981	80	589	901	1441	0	0	No	0.878378	0.999878	-0.00274234	-0.153224	AAAGCACGTTGGTTGTTTTTAACACTTTCAAC	32	USA300HOU_RS14890;DBGWAS_general_tag=replication_protein
3	n304019	7	4	589	3	1441	0	0	No	NA	NA	NA	NA	AAAGGGTTCTGTTGCAAAGTAAAAAAATATA	31
3	n304207	1171	50	589	1121	1441	0	0	No	0.863345	0.999878	0.00389847	-0.17205	GATTAGAGCAACTTATAACAGCATACGGTAAAGCTGGAGGTGAAATATGGCCACGAATGAAAGAGCATATAATAGAACTCAATGC	85	USA300HOU_RS14865;DBGWAS_general_tag=Mph(C)_family_macrolide_2\'-phosphotransferase
3	n304311	1	0	589	1	1441	0	0	No	NA	NA	NA	NA	TTTTTTTACTTTGCAACAGAACCGATTAGAGCAACTTATAACAGCATACGGTA	53	USA300HOU_RS14865;DBGWAS_general_tag=Mph(C)_family_macrolide_2\'-phosphotransferase
3	n304340	1179	46	589	1133	1441	0	0	No	0.0139884	0.493255	-0.0473708	2.46546	GAATTAAAAGTGTCTAGGCAAACTATTAATGCAATAGAAAACAATAAATATG	52	USA300HOU_RS14880;DBGWAS_general_tag=transcriptional_regulator
3	n304773	1615	231	589	1384	1441	0	0	No	0.840091	0.999878	0.00479783	-0.201701	ATATTTAATATTAAGAATATTTAATGTTTCCGGTAAAGAACCACAAT	47	USA300HOU_RS00135;DBGWAS_general_tag=hypothetical_protein
3	n304879	17	16	589	1	1441	0	0	No	NA	NA	NA	NA	TTCTTGTTAATCATATTATAACACTGGTTAATAGAGGAATGCAA	44
3	n305761	42	38	589	4	1441	0	0	No	NA	NA	NA	NA	AAGGGTTCTGTTGCAAAGTAAAAAAATATAG	31
3	n306740	981	82	589	899	1441	0	0	No	0.763511	0.999878	-0.00545876	-0.301107	CACGTTGGTTGTTTTTAACACTTTCAACAAAAAATGCG	38	USA300HOU_RS14890;DBGWAS_general_tag=replication_protein
3	n307005	35	34	589	1	1441	0	0	No	NA	NA	NA	NA	TATATTTTTTTACTTTGCAACAGAACCCTTCA	32
3	n307226	968	82	589	886	1441	0	0	No	0.925435	0.999878	-0.0013966	-0.0937192	ATCTATCGCATTTTTTGTTGAAAGTGTTAAAAACAA	36	USA300HOU_RS14890;DBGWAS_general_tag=replication_protein
3	n307387	27	26	589	1	1441	0	0	No	NA	NA	NA	NA	ATTATAACACTGGTTAATAGAGGAATGCAAAA	32
3	n307854	979	80	589	899	1441	0	0	No	0.85964	0.999878	-0.00317699	-0.177019	AGCACGTTGGTTGTTTTTAACACTTTCAACAA	32	USA300HOU_RS14890;DBGWAS_general_tag=replication_protein
3	n308100	976	89	589	887	1441	0	0	No	0.863684	0.999878	-0.00230839	-0.17177	CCATCTATCGCATTTTTTGTTGAAAGTGTTAA	32	USA300HOU_RS14890;DBGWAS_general_tag=replication_protein
3	n310323	8	7	589	1	1441	0	0	No	NA	NA	NA	NA	ATAAATTCAACTTTGCAACAGAACCATTTAGAATATTAAAATTCCTTCATTACA	54
3	n317147	1	1	589	0	1441	0	0	No	NA	NA	NA	NA	ATTTTTTTACTTTGCAACAGAACCGAATTAAAAGTGTCTAGGCAAACTATTAAT	54	USA300HOU_RS14880;DBGWAS_general_tag=transcriptional_regulator
3	n317148	3	0	589	3	1441	0	0	No	NA	NA	NA	NA	ATTTTTTTACTTTGCAACAGAACCGAATTATATAACTCAAGAAGAATGGGTTAA	54	USA300HOU_RS14890;DBGWAS_general_tag=replication_protein
3	n317883	4	1	589	3	1441	0	0	No	NA	NA	NA	NA	TAATTCGGTTCTGTTGCAAAGTAAAAAAATAT	32
3	n318365	1	0	589	1	1441	0	0	No	NA	NA	NA	NA	AAGTTTATTAGATAAAGGTAAAGTCATAAAATGTAATCAATGTGAACAAATATTCTTTAAA	61
3	n319944	1	0	589	1	1441	0	0	No	NA	NA	NA	NA	TATGACTTTACCTTTATCTAATAAACTTCCGGTTCTGTTGCAAAGTAAAAAAATATAG	58
3	n320730	2	0	589	2	1441	0	0	No	NA	NA	NA	NA	TTTATGACTTTACCTTTATCTAATAAACTTCC	32
3	n324692	17	17	589	0	1441	0	0	No	NA	NA	NA	NA	TTTTTTTACTTTGCAACAGAACCGATTAGATGCTATAATTGTTATTAAAAGGA	53
3	n325362	109	47	589	62	1441	0	0	No	NA	NA	NA	NA	CTAAGCATCCTTCAATCCTTTTAATAACAATTATAGCATCTAATC	45
3	n326606	26	0	589	26	1441	0	0	No	NA	NA	NA	NA	GTATTTTGCTATAATTATTAAATTAATTGCC	31	USA300HOU_RS14940;DBGWAS_general_tag=hypothetical_protein
3	n333107	1	1	589	0	1441	0	0	No	NA	NA	NA	NA	TAAATTCAACTTTGCAACAGAACCGATTCACATATCCCCCTGCAATAGGAAATA	54
3	n333477	17	3	589	14	1441	0	0	No	NA	NA	NA	NA	AAAGGTTCTGTTGCAAAGTAAAAAAATATAG	31
3	n334787	1300	12	589	1288	1441	0	0	No	0.19017	0.999878	0.0108257	-1.31261	AAGGTTCTGTTGCAAAGTAAAAAAATATAGC	31
3	n336299	1291	6	589	1285	1441	0	0	No	0.343771	0.999878	0.008049	-0.949407	AGAAGGTTCTGTTGCAAAGTAAAAAAATATAG	32
3	n336694	43	4	589	39	1441	0	0	No	NA	NA	NA	NA	CTATATTTTTTTACTTTGCAACAGAACCTTA	31
3	n340556	3	0	589	3	1441	0	0	No	NA	NA	NA	NA	ATATTTTTTTACTTTGCAACAGAACCGTATCGACGGAGCCGATTTTGAAACCACAA	56	USA300HOU_RS14805;DBGWAS_general_tag=streptothricin_N-acetyltransferase_Sat4
3	n344788	1491	300	589	1191	1441	0	0	No	0.840076	0.999878	-0.00433654	0.201594	CATTTAGAATATTAAAATTCCTTCATTACACTCTTGGCG	39	USA300HOU_RS14765;DBGWAS_general_tag=penicillin-hydrolyzing_class_A_beta-lactamase_BlaZ
3	n345115	2025	585	589	1440	1441	0	0	No	NA	NA	NA	NA	ATGTTAATTCTTGTTGTTGGATTTCTCGCTCCGAATA	37	USA300HOU_RS06970;DBGWAS_general_tag=anthranilate_phosphoribosyltransferase~~~SAOUHSC_01368;DBGWAS_general_tag=anthranilate_phosphoribosyltransferase
3	n345912	1	0	589	1	1441	0	0	No	NA	NA	NA	NA	TTTTTTACTTTGCAACAGAACCCCTAAAATACTTATTAGAAACATATATGAT	52	USA300HOU_RS14830;DBGWAS_general_tag=ABC_transporter_permease
3	n346487	2028	588	589	1440	1441	0	0	No	NA	NA	NA	NA	GTATTAATTAAGCTACGTACAATATATGTTAATTCTTGTTGTTGGATTTCTCGCT	55	USA300HOU_RS06970;DBGWAS_general_tag=anthranilate_phosphoribosyltransferase~~~SAOUHSC_01368;DBGWAS_general_tag=anthranilate_phosphoribosyltransferase
3	n348624	1574	229	589	1345	1441	0	0	No	0.88213	0.999878	-0.00171796	0.148145	AAAATAAAATTGTGATCTAATAAAAATAGAA	31	TCH1516intergenic_35769-35876
3	n349106	1342	5	589	1337	1441	0	0	No	0.0620457	0.999878	0.0210539	-1.8777	AAATAAAATTGTGATCTAATAAAAATAGAAGGTTCTGTTGCAAAGTAAAAAA	52	TCH1516intergenic_35769-35876
3	n349795	2029	589	589	1440	1441	0	0	No	NA	NA	NA	NA	TTTAATTGAACAACATAATATTAATTTAGTTACTTCAATC	40	TCH1516intergenic_2445641-2446127~~~NCTC8325intergenic_2392289-2392775
3	n350321	1615	231	589	1384	1441	0	0	No	0.964933	0.999878	-0.00104892	0.0440828	TTTTAGCTCTTGTTCAAGTAATCATTTTTCGCCAAAAACTTTATACTGAA	50	USA300HOU_RS00135;DBGWAS_general_tag=hypothetical_protein
3	n350659	13	6	589	7	1441	0	0	No	NA	NA	NA	NA	AATGGTTCTGTTGCAAAGTAAAAAAATATAG	31
3	n351535	27	0	589	27	1441	0	0	No	NA	NA	NA	NA	ACGGTTCTGTTGCAAAGTAAAAAAATATAGC	31
3	n351721	16	15	589	1	1441	0	0	No	NA	NA	NA	NA	GCTATATTTTTTTACTTTGCAACAGAACCCCTAAAAT	37
3	n351722	1	0	589	1	1441	0	0	No	NA	NA	NA	NA	GCTATATTTTTTTACTTTGCAACAGAACCCGGGAAAGTCAGTGGAAAATAGACCTGTAT	59	USA300HOU_RS14870;DBGWAS_general_tag=recombinase_family_protein
3	n351723	191	186	589	5	1441	0	0	No	NA	NA	NA	NA	TATATTTTTTTACTTTGCAACAGAACCGAAAA	32
3	n352090	188	186	589	2	1441	0	0	No	NA	NA	NA	NA	TTATTTTCGGTTCTGTTGCAAAGTAAAAAAATA	33
3	n352121	3	0	589	3	1441	0	0	No	NA	NA	NA	NA	TATTTTTTTACTTTGCAACAGAACCGAAAAGAAGATAGA	39
3	n352194	72	51	589	21	1441	0	0	No	NA	NA	NA	NA	ATTGGTTCTGTTGCAAAGTAAAAAAATATAG	31
3	n352281	43	16	589	27	1441	0	0	No	NA	NA	NA	NA	ATGGTTCTGTTGCAAAGTAAAAAAATATAGC	31
3	n352286	19	8	589	11	1441	0	0	No	NA	NA	NA	NA	ATGGGTTCTGTTGCAAAGTAAAAAAATATAG	31
3	n352327	9	2	589	7	1441	0	0	No	NA	NA	NA	NA	AAGAGGTTCTGTTGCAAAGTAAAAAAATATAGC	33
3	n352328	33	6	589	27	1441	0	0	No	NA	NA	NA	NA	AGAGGGTTCTGTTGCAAAGTAAAAAAATATA	31
3	n352346	1223	155	589	1068	1441	0	0	No	0.598504	0.999878	-0.00419021	0.527292	AGCTATATTTTTTTACTTTGCAACAGAACCA	31
3	n352347	138	89	589	49	1441	0	0	No	NA	NA	NA	NA	AGCTATATTTTTTTACTTTGCAACAGAACCC	31
3	n352348	1423	36	589	1387	1441	0	0	No	0.0293503	0.891417	0.0280312	-2.19212	AGCTATATTTTTTTACTTTGCAACAGAACCT	31
3	n352349	249	192	589	57	1441	0	0	No	0.00285292	0.124768	-0.0278211	-2.98731	AGCTATATTTTTTTACTTTGCAACAGAACCG	31
3	n352437	91	57	589	34	1441	0	0	No	NA	NA	NA	NA	AGGGTTCTGTTGCAAAGTAAAAAAATATAGC	31
3	n352554	12	0	589	12	1441	0	0	No	NA	NA	NA	NA	CAGGTTCTGTTGCAAAGTAAAAAAATATAGC	31
3	n352555	13	12	589	1	1441	0	0	No	NA	NA	NA	NA	CAGGGTTCTGTTGCAAAGTAAAAAAATATAG	31
3	n352623	2	1	589	1	1441	0	0	No	NA	NA	NA	NA	CCGGTTCTGTTGCAAAGTAAAAAAATATAGC	31
3	n352626	1580	229	589	1351	1441	0	0	No	0.995018	0.999878	-7.59881e-05	0.00616719	CTAAAATAAAATTGTGATCTAATAAAAATAGA	32	TCH1516intergenic_35769-35876
3	n352644	45	38	589	7	1441	0	0	No	NA	NA	NA	NA	CTATATTTTTTTACTTTGCAACAGAACCAAA	31
3	n352645	8	2	589	6	1441	0	0	No	NA	NA	NA	NA	CTATATTTTTTTACTTTGCAACAGAACCAAG	31
3	n352646	51	49	589	2	1441	0	0	No	NA	NA	NA	NA	CTATATTTTTTTACTTTGCAACAGAACCACA	31
3	n352647	43	43	589	0	1441	0	0	No	NA	NA	NA	NA	CTATATTTTTTTACTTTGCAACAGAACCACC	31
3	n352648	11	6	589	5	1441	0	0	No	NA	NA	NA	NA	CTATATTTTTTTACTTTGCAACAGAACCATA	31
3	n352649	16	4	589	12	1441	0	0	No	NA	NA	NA	NA	CTATATTTTTTTACTTTGCAACAGAACCATC	31
3	n352650	6	0	589	6	1441	0	0	No	NA	NA	NA	NA	CTATATTTTTTTACTTTGCAACAGAACCAGA	31
3	n352651	1060	37	589	1023	1441	0	0	No	0.777491	0.999878	-0.00317019	0.28248	CTATATTTTTTTACTTTGCAACAGAACCAGC	31
3	n352652	25	22	589	3	1441	0	0	No	NA	NA	NA	NA	CTATATTTTTTTACTTTGCAACAGAACCCAA	31
3	n352653	35	6	589	29	1441	0	0	No	NA	NA	NA	NA	CTATATTTTTTTACTTTGCAACAGAACCCTC	31
3	n352654	12	4	589	8	1441	0	0	No	NA	NA	NA	NA	CTATATTTTTTTACTTTGCAACAGAACCTAA	31
3	n352655	11	0	589	11	1441	0	0	No	NA	NA	NA	NA	CTATATTTTTTTACTTTGCAACAGAACCTGA	31
3	n352656	196	187	589	9	1441	0	0	No	NA	NA	NA	NA	CTATATTTTTTTACTTTGCAACAGAACCGAA	31
3	n352657	11	0	589	11	1441	0	0	No	NA	NA	NA	NA	CTATATTTTTTTACTTTGCAACAGAACCGTA	31
3	n352758	1071	39	589	1032	1441	0	0	No	0.940683	0.999878	-0.000769412	0.0743307	CTGGTTCTGTTGCAAAGTAAAAAAATATAGC	31
3	n352895	1309	29	589	1280	1441	0	0	No	0.678169	0.999878	-0.00469227	0.414734	TAGGTTCTGTTGCAAAGTAAAAAAATATAGC	31
3	n352922	205	191	589	14	1441	0	0	Yes	0.000187408	0.010877	-0.0447353	-3.74401	TCGGTTCTGTTGCAAAGTAAAAAAATATAGC	31
3	n352999	106	72	589	34	1441	0	0	No	NA	NA	NA	NA	TTGGTTCTGTTGCAAAGTAAAAAAATATAGC	31
3	n353021	44	30	589	14	1441	0	0	No	NA	NA	NA	NA	TGGGTTCTGTTGCAAAGTAAAAAAATATAGC	31
3	n353048	92	81	589	11	1441	0	0	No	NA	NA	NA	NA	GCTATATTTTTTTACTTTGCAACAGAACCAC	31
3	n353876	86	84	589	2	1441	0	0	No	NA	NA	NA	NA	ATGTCAACGATAATACAAACTATAAGATGATATCAGTATTTATTATGCATTTAGAATATT	60	TCH1516intergenic_7390-7915
3	n356714	3	3	589	0	1441	0	0	No	NA	NA	NA	NA	ATTATAGTCAAGTCCAGACTCCTGTGTAAAA	31
3	n356792	3	3	589	0	1441	0	0	No	NA	NA	NA	NA	CATAATTTTGAAATAAATATCCTAATTTATAGTCAAGTCCAGACTCCTGTGTAAA	55	USA300HOU_RS05135;DBGWAS_general_tag=ABC_transporter_ATP-binding_protein~~~SAOUHSC_00970;DBGWAS_general_tag=ABC_transporter_ATP-binding_protein
3	n356851	19	19	589	0	1441	0	0	No	NA	NA	NA	NA	ATTTTACACAGGAGTCTGGACTTGACTATAA	31
3	n357361	33	32	589	1	1441	0	0	No	NA	NA	NA	NA	CATTTTACACAGGAGTCTGGACTTGACTATA	31
3	n357848	16	16	589	0	1441	0	0	No	NA	NA	NA	NA	TTTATAGTCAAGTCCAGACTCCTGTGTAAAA	31
3	n363601	1144	68	589	1076	1441	0	0	No	0.971898	0.999878	0.000800151	-0.035211	AGATGAACAAAGCCCTGAAAAGATTATCGAGCTGTATGCGGAG	43	USA300HOU_RS14800;DBGWAS_general_tag=aminoglycoside_O-phosphotransferase_APH(3\')-IIIa
3	n364210	4	3	589	1	1441	0	0	No	NA	NA	NA	NA	AATAGGTTCTGTTGCAAAGTAAAAAAATATA	31
3	n365200	1144	68	589	1076	1441	0	0	No	0.971898	0.999878	0.000800151	-0.035211	CACTCCGCATACAGCTCGATAATCTTTTCAGG	32	USA300HOU_RS14800;DBGWAS_general_tag=aminoglycoside_O-phosphotransferase_APH(3\')-IIIa
3	n367047	1172	52	589	1120	1441	0	0	No	0.786432	0.999878	-0.00538165	0.270885	AAAACATTAGAAGCATTAGAAATGTTTATGAATA	34	USA300HOU_RS14860;DBGWAS_general_tag=ABC-F_type_ribosomal_protection_protein_Msr(A)
3	n367380	1173	52	589	1121	1441	0	0	No	0.861164	0.999878	0.0036281	-0.174787	CATAAACATTTCTAATGCTTCTAATGTTTTAATA	34	USA300HOU_RS14860;DBGWAS_general_tag=ABC-F_type_ribosomal_protection_protein_Msr(A)
3	n369428	45	10	589	35	1441	0	0	No	NA	NA	NA	NA	ACTATAAATTCAACTTTGCAACAGAACCGAT	31	TCH1516intergenic_12245-12506
3	n369429	1439	232	589	1207	1441	0	0	No	0.738169	0.999878	0.00247831	-0.334119	ACTATAAATTCAACTTTGCAACAGAACCGTA	31	TCH1516intergenic_12245-12506~~~TCH1516intergenic_21070-21543
3	n369430	7	2	589	5	1441	0	0	No	NA	NA	NA	NA	ACTATAAATTCAACTTTGCAACAGAACCGTC	31	TCH1516intergenic_12245-12506~~~TCH1516intergenic_21070-21543
3	n369633	1448	240	589	1208	1441	0	0	No	0.713072	0.999878	0.0027051	-0.367559	ACGGTTCTGTTGCAAAGTTGAATTTATAGTA	31	TCH1516intergenic_12245-12506~~~TCH1516intergenic_21070-21543
3	n369691	1473	261	589	1212	1441	0	0	No	0.631644	0.999878	0.00349506	-0.479192	ATACTATAAATTCAACTTTGCAACAGAACCG	31	TCH1516intergenic_12245-12506
3	n369991	893	38	589	855	1441	0	0	No	0.850182	0.999878	0.00277457	0.188802	ATTTTAAAGTGATATCATACAAAGCTGTACT	31	USA300HOU_RS15665;DBGWAS_general_tag=hypothetical_protein~~~TCH1516intergenic_1524-2387
3	n370018	17	16	589	1	1441	0	0	No	NA	NA	NA	NA	TATTTTTTTACTTTGCAACAGAACCGATTAGA	32
3	n370698	1141	63	589	1078	1441	0	0	No	0.665043	0.999878	-0.00455508	0.432822	TACTATAAATTCAACTTTGCAACAGAACCTC	31	TCH1516intergenic_12245-12506~~~USA300HOU_RS14825;DBGWAS_general_tag=hypothetical_protein
3	n370699	83	29	589	54	1441	0	0	No	NA	NA	NA	NA	TACTATAAATTCAACTTTGCAACAGAACCGA	31	TCH1516intergenic_12245-12506
3	n370700	6	0	589	6	1441	0	0	No	NA	NA	NA	NA	TACTATAAATTCAACTTTGCAACAGAACCGC	31	TCH1516intergenic_12245-12506
3	n370706	1706	321	589	1385	1441	0	0	No	0.199422	0.999878	0.0163814	-1.28289	TATACTATAAATTCAACTTTGCAACAGAACC	31	TCH1516intergenic_12245-12506
3	n373175	1593	234	589	1359	1441	0	0	No	0.774401	0.999878	0.00507666	-0.286489	ACATAAAAAATGGTTCCTCAATACTAGAAGA	31	USA300HOU_RS00135;DBGWAS_general_tag=hypothetical_protein
3	n374128	1	0	589	1	1441	0	0	No	NA	NA	NA	NA	CTTATATTCTTTCATAGCAAACATTTCATTCATTTAGCGACATAAAAAATGGTTCCTC	58	USA300HOU_RS00135;DBGWAS_general_tag=hypothetical_protein
3	n374221	1592	233	589	1359	1441	0	0	Yes	4.41889e-06	0.00030511	0.0792017	-4.6255	TTCATTTAGCGACATAAAAAATGGTTCCTCAATACTAGAAG	41	USA300HOU_RS00135;DBGWAS_general_tag=hypothetical_protein
3	n374225	1591	233	589	1358	1441	0	0	Yes	1.481e-05	0.000970018	0.0725143	-4.35707	ATTTCATTTAGCGACATAAAAAATGGTTCCTC	32	USA300HOU_RS00135;DBGWAS_general_tag=hypothetical_protein
3	n376870	15	9	589	6	1441	0	0	No	NA	NA	NA	NA	GTATATCCAATATCAAATTCTCTATCTCCATATAAACAGACTG	43
3	n386561	18	0	589	18	1441	0	0	No	NA	NA	NA	NA	GAAAAGAAGATAGATAATGTAAGTTATGCAGATATACTGGAAATT	45
3	n391888	1616	230	589	1386	1441	0	0	No	0.988044	0.999878	0.000372552	-0.0148702	ATATTTCTGCTTATATTCTTTCATAGCAAACAT	33	USA300HOU_RS00135;DBGWAS_general_tag=hypothetical_protein
3	n395050	975	77	589	898	1441	0	0	No	0.791039	0.999878	0.00472847	0.264759	ATTAACCCATTCTTCTTGAGTTATATAATTC	31	USA300HOU_RS14890;DBGWAS_general_tag=replication_protein
3	n396461	1328	10	589	1318	1441	0	0	No	0.92351	0.999878	0.00286154	-0.0961583	AAACACTGGAGGAAGCGGCAGAAAATATTCT	31	USA300HOU_RS00295;DBGWAS_general_tag=hypothetical_protein
3	n396473	1329	10	589	1319	1441	0	0	No	0.615125	0.999878	0.0166289	-0.503044	AAACATGGGAATGTGAAACACTGGAGGAAGCGGCAGAAAATATTC	45	USA300HOU_RS00295;DBGWAS_general_tag=hypothetical_protein
3	n399677	1590	232	589	1358	1441	0	0	Yes	3.39273e-05	0.00213727	0.0676015	-4.16736	ATTCTTTCATAGCAAACATTTCATTTAGCGACATAAAAAATGGTTCC	47	USA300HOU_RS00135;DBGWAS_general_tag=hypothetical_protein
3	n399923	1615	230	589	1385	1441	0	0	No	0.869602	0.999878	-0.00384595	0.164246	GCTAAATGAAATGTTTGCTATGAAAGAATATAAG	34	USA300HOU_RS00135;DBGWAS_general_tag=hypothetical_protein
3	n400553	1597	234	589	1363	1441	0	0	No	0.00516262	0.209441	0.0433547	-2.80059	AATGTTACCAACATCTCTATTCCATAATACGG	32	USA300HOU_RS14915;DBGWAS_general_tag=thiolase-like_protein
3	n401123	8	8	589	0	1441	0	0	No	NA	NA	NA	NA	ATATAGGTTCTGTTGCAAAGTAAAAAAATAT	31
3	n401373	18	1	589	17	1441	0	0	No	NA	NA	NA	NA	ATTTCGGTTCTGTTGCAAAGTTGAATTTATA	31
3	n401938	1617	232	589	1385	1441	0	0	Yes	1.12344e-08	1.02251e-06	0.134954	-5.77014	CGCTAAATGAAATGTTTGCTATGAAAGAATA	31	USA300HOU_RS00135;DBGWAS_general_tag=hypothetical_protein
3	n403937	1090	37	589	1053	1441	0	0	No	0.799562	0.999878	-0.00349517	0.25379	TATAAATTCAACTTTGCAACAGAACCTCCTAA	32	TCH1516intergenic_12245-12506~~~USA300HOU_RS14825;DBGWAS_general_tag=hypothetical_protein
3	n403977	7	0	589	7	1441	0	0	No	NA	NA	NA	NA	ATACGGTTCTGTTGCAAAGTAAAAAAATATA	31
3	n403978	1430	223	589	1207	1441	0	0	No	0.0492022	0.999878	0.0146618	-1.96766	ATACGGTTCTGTTGCAAAGTTGAATTTATAG	31	TCH1516intergenic_21070-21543
3	n405947	1145	68	589	1077	1441	0	0	No	0.857482	0.999878	-0.00411371	0.179508	TGGATTACTTACTGAATAACGATCTGGCCGATGTGGATTGCGAAA	45	USA300HOU_RS14800;DBGWAS_general_tag=aminoglycoside_O-phosphotransferase_APH(3\')-IIIa
3	n406814	1145	68	589	1077	1441	0	0	No	0.857482	0.999878	-0.00411371	0.179508	ATAACGATCTGGCCGATGTGGATTGCGAAAAC	32	USA300HOU_RS14800;DBGWAS_general_tag=aminoglycoside_O-phosphotransferase_APH(3\')-IIIa
4	n461	2	2	589	0	1441	0	0	No	NA	NA	NA	NA	GTAGTGAAAAAACATAGACATGAGTAAAGGAATATATCTACATATCATATTGTTGAGGATA	61	NCTC8325intergenic_1547147-1547620~~~TCH1516intergenic_1644534-1645007
4	n462	525	525	589	0	1441	0	0	Yes	1.06148e-05	0.000705131	-0.136184	-4.62493	TAGTGAAAAAACATAGACATGAGTAAAGGTATATAT	36	NCTC8325intergenic_1547147-1547620
4	n463	1	1	589	0	1441	0	0	No	NA	NA	NA	NA	TAGTGAAAAAACATAGACATGAGTAAAGGTGTATATCTACATATCATATTGTTGAGGATAA	61	NCTC8325intergenic_1547147-1547620~~~TCH1516intergenic_1644534-1645007
4	n464	1502	61	589	1441	1441	0	0	Yes	5.33985e-13	6.71265e-11	0.305273	-7.71953	ATTGGTAGTGAAAAAACATAGACATGAGTAGAGGTATATATCTACATATCA	51	NCTC8325intergenic_1547147-1547620~~~TCH1516intergenic_1644534-1645007
4	n945	1	0	589	1	1441	0	0	No	NA	NA	NA	NA	AAAAAAGGTGTAAACTCAGTCATAATTATCCATTCCTTTCATAAGAATTAACTGTTAACTA	61
4	n1031	2	2	589	0	1441	0	0	No	NA	NA	NA	NA	AAAAACATAGACATGAGTAAAGGTATATATATACATATCATATTGTTGAGGATAAAACATA	61	NCTC8325intergenic_1547147-1547620~~~TCH1516intergenic_1644534-1645007
4	n1032	523	523	589	0	1441	0	0	Yes	6.84181e-05	0.00422459	-0.114717	-4.15346	AAAAACATAGACATGAGTAAAGGTATATATCTACATATCATATTGTTGAG	50	NCTC8325intergenic_1547147-1547620~~~TCH1516intergenic_1644534-1645007
4	n1465	7	7	589	0	1441	0	0	No	NA	NA	NA	NA	TTGAAATAAAAGTTATTCAAAAATCATCTTTCCAATAAGGATTGAACCTGCATTTTCGATC	61
4	n1608	1	1	589	0	1441	0	0	No	NA	NA	NA	NA	TTTCTTAGTCGACGTTCATTTTCTGTTAAAAATTCTACTGGCGCGTGCTCTCTTCTGAAAACCCTTGGTATTCTGATG	78	USA300HOU_RS07915;DBGWAS_general_tag=hypothetical_protein
4	n1664	2030	589	589	1441	1441	0	0	No	NA	NA	NA	NA	CTTAACATTGACTCATCTTAACTCTTGATTAAAAATTTTATGCATTCAGTTAAACATATCAATGTTATTTTTATTAGCTATTATGTTTTATCCTCAACAAT	101	NCTC8325intergenic_1547147-1547620~~~TCH1516intergenic_1644534-1645007
4	n1999	2028	587	589	1441	1441	0	0	No	NA	NA	NA	NA	AATAATCCACCTAAAAAGTACTTTTTAATTCCAAAGAAAGCTAATATCAATAATGCT	57	USA300HOU_RS13110;DBGWAS_general_tag=hypothetical_protein~~~SAOUHSC_02711;DBGWAS_general_tag=hypothetical_protein
4	n2563	1	1	589	0	1441	0	0	No	NA	NA	NA	NA	CAGCATACCAAGGGTTTTCAGAAGAGATCATGCGTCGGTAGAATCTTTAACAGAAAACGAACGTAGACTAAGAAAGGAAATATTAATAAGTATTAAAAAAGGTTATTACAGCTACTT	117
4	n2815	2025	584	589	1441	1441	0	0	No	NA	NA	NA	NA	AAAATACTGGAGAACAAATGTCAGGATATAA	31	TCH1516intergenic_168320-168692~~~NCTC8325intergenic_113710-114082
4	n2816	4	4	589	0	1441	0	0	No	NA	NA	NA	NA	AAAATACTGGAGAACAAATGTCAGGATATATCTTAGGATACTATGTAATAAAAATTTACAA	61	TCH1516intergenic_168320-168692~~~NCTC8325intergenic_113710-114082
4	n3514	1496	153	589	1343	1441	0	0	No	0.492572	0.999878	-0.0165493	0.68604	TTTAACAGAAAATGAACGTCGACTAAGAAAGGAAATATTAG	41	USA300HOU_RS07915;DBGWAS_general_tag=hypothetical_protein
4	n5692	2	2	589	0	1441	0	0	No	NA	NA	NA	NA	CGAAATAATTTCTAATCTTCTTTTTTAAATGGCAGTGTGTCAATAGAAAA	50	NCTC8325intergenic_2133481-2134740~~~TCH1516intergenic_2186942-2187060
4	n5842	2	0	589	2	1441	0	0	No	NA	NA	NA	NA	AAATACTGGAGAACAAATGTCAGGATATAATTTAGGATACTATGTAATAAAAATTTACAAT	61	TCH1516intergenic_168320-168692~~~NCTC8325intergenic_113710-114082
4	n7334	2021	588	589	1433	1441	0	0	No	NA	NA	NA	NA	AAACCACCGACTACCCATGTGTAGTTAAATGATTGATTATTGTAAAAGTGAATAGTAAATACTTCTGGATTGATAATGAT	80	USA300HOU_RS03360;DBGWAS_general_tag=hypothetical_protein~~~SAOUHSC_00621;DBGWAS_general_tag=hypothetical_protein
4	n10521	11	11	589	0	1441	0	0	No	NA	NA	NA	NA	ATGAACGTCGACTAAGAAAGGAAATATTAGAAAGTA	36	USA300HOU_RS07915;DBGWAS_general_tag=hypothetical_protein
4	n10522	1485	142	589	1343	1441	0	0	No	0.957293	0.999878	0.0014862	-0.0535	ATGAACGTCGACTAAGAAAGGAAATATTAGGAAGTATTAAAAAA	44	USA300HOU_RS07915;DBGWAS_general_tag=hypothetical_protein
4	n11290	2029	589	589	1440	1441	0	0	No	NA	NA	NA	NA	GATACTGGGATAAGTTACGGTAATATTAATGCTATGCGCCGTAGAGAAAGAAGAATAGAAA	61	USA300HOU_RS06595;DBGWAS_general_tag=hypothetical_protein~~~SAOUHSC_01288;DBGWAS_general_tag=hypothetical_protein
4	n11957	1495	152	589	1343	1441	0	0	No	0.542439	0.999878	-0.0154459	0.608941	CAGTAGAATCTTTAACAGAAAATGAACGTCGACTAAGAAA	40	USA300HOU_RS07915;DBGWAS_general_tag=hypothetical_protein
4	n12797	2	2	589	0	1441	0	0	No	NA	NA	NA	NA	TTAATTTGTTTTTTAGTGTTTTTTTAATGGCAGTGTGTCAATAGAAAAATGA	52
4	n12972	2030	589	589	1441	1441	0	0	No	NA	NA	NA	NA	GTCTAATTGGTAGTGAAAAAACATAGACATGAGTA	35	NCTC8325intergenic_1547147-1547620~~~TCH1516intergenic_1644534-1645007
4	n15398	7	4	589	3	1441	0	0	No	NA	NA	NA	NA	ATGTTGTTATCAACCTAAGGAGGTGATATTTATGTCTAAACATATTTACGCTTGTTTACTTGGTGAATGGGTAAATCTGTCAGAATCTGAGAATGTAGTAATCGATAATAGTTATACTGATGCTAATTTGTGGTACAAAGAAGTAGGTCATAAAATGTTCGATTACAATCAAATGCACATTGGATACAACGGCATTGACTACTTCATTCATCCAAGCTTCATCCAAGTTTTAACCAAGTAATTTCTTAATTACTTCACAGCTATGACTGTCAAGCTCCACCTTGACGGTCTTATGGCTGTACACTCTTTCAACTTCTTGCACAATTCTGTCCCATTCATATTTGGGCATGCCATTGATAGCTTCTAAAATTTTGTTTAAACGATTTTGCAATCCTTCCA…	404	TCH1516intergenic_1601133-1601200~~~NCTC8325intergenic_2069439-2070260~~~NCTC8325intergenic_1502932-1502986
4	n16685	526	526	589	0	1441	0	0	Yes	2.83822e-07	2.23494e-05	-0.172574	-5.41234	ACCTTTACTCATGTCTATGTTTTTTCACTAC	31	NCTC8325intergenic_1547147-1547620
4	n17277	24	19	589	5	1441	0	0	No	NA	NA	NA	NA	TTGCTCGTGACTATTTCAGCATTTACTCTTCTGTGTTATTGGGATTACAAGAAGAAGAAAAAAGCAGAAAAGATTTAGGATTGTAAGGCAATAGCGCACTTGATTACTTGCACTAATTAAGTGCGCTTATTTAATTAGATATTTCTTACCTTCTCTATCCGAGACCACTTTATATTTTTTTAATTTGCTTTCTTTCACTTTTAACCATTGATTTCCATGCCACACGTCAATTAAGTTTTCGTGTTTTTTATTGAATAGCCTTCTTAGTAGTTTCATTTGT	280
4	n17632	18	7	589	11	1441	0	0	No	NA	NA	NA	NA	AAGATGATTTTTGAATAACTTTTATTTCAAAGTTATTTATCTTCTCCAAGTTTTCTTCAACCGCCTCGACAGCTTTTAAGGTTGATTCAATCAACTTTTTGAGTTCGTCGAGGTTTGTTGCTTCGATGTTTTTTATTTGCAATCCTTCCATTTGTTGTTCCTCCT	165
4	n20196	46	9	589	37	1441	0	0	No	NA	NA	NA	NA	AAAAGATTATGAAGTAACAATTTGAATAAAGATAGGATGAATTCGGTAATCTTTACCCTTGTAATTAATCATGATGTAGTCCTGTTGATACATTGTATCAGCTTCTAATTTTTGAATTGGAGACCATAATTCAGCGTTTTCTTCCCACCATATTGATGGAGAAGTCATACGAGGTCCCATTTTGCAATTTTCATCATCATGAAGATTAACCCATTCACCTAAAAGACAAGCGTGGACTTGTTCCATACTTATCACCTCCTTAGGTTGATAA	271
4	n20520	123	117	589	6	1441	0	0	No	NA	NA	NA	NA	TTCCAGTTTTAATAATGCATACATTACAGTTTCAAAATCATATTTTCCAAATACAACATTATCTTTGAAATTGTATTCGGTGAGCGGTTCACCAATCTTTTTATTAGTTTCAATTTCTAACAAAAGATGTCTAACACAATCATGATCTAATTTCATACTTATCACTAC	168
4	n21941	2020	587	589	1433	1441	0	0	No	NA	NA	NA	NA	TAAATTGCCAGTTAAAAAGCTAACCCCAAGCAAACCACCGACTACCCATGTGTAGTTAAAT	61	USA300HOU_RS03360;DBGWAS_general_tag=hypothetical_protein~~~SAOUHSC_00621;DBGWAS_general_tag=hypothetical_protein
4	n21942	1	1	589	0	1441	0	0	No	NA	NA	NA	NA	TAAATTGCCAGTTAAAAAGCTAACCCCAAGTAAACCACCGACTACCCATGTGTAGTTAAAT	61	USA300HOU_RS03360;DBGWAS_general_tag=hypothetical_protein~~~SAOUHSC_00621;DBGWAS_general_tag=hypothetical_protein
4	n22087	528	528	589	0	1441	0	0	Yes	5.33985e-13	6.71265e-11	-0.305273	-7.71953	ATTGGTAGTGAAAAAACATAGACATGAGTAAAGG	34	NCTC8325intergenic_1547147-1547620~~~TCH1516intergenic_1644534-1645007
4	n22477	1	0	589	1	1441	0	0	No	NA	NA	NA	NA	ATGTCTATGTTTTTTCACTACCAATTAGACCTGTCTCTTATAC	43	NCTC8325intergenic_1547147-1547620~~~TCH1516intergenic_1644534-1645007
4	n22478	2030	589	589	1441	1441	0	0	No	NA	NA	NA	NA	ATGTCTATGTTTTTTCACTACCAATTAGACGATTCGTTTTATATTTTAAAAATTATTTTAAAAATAAAAAGCCTCAT	77	NCTC8325intergenic_1547147-1547620~~~TCH1516intergenic_1644534-1645007
4	n23930	3	3	589	0	1441	0	0	No	NA	NA	NA	NA	CCATTAAAAAAACACTAAAAAACAAATTAAAA	32
4	n26893	18	7	589	11	1441	0	0	No	NA	NA	NA	NA	AATGTTGTTATCAACCTAAGGAGGTGATAAATATGGGTAAGTTTTCTAAAGGTTCAAACTCTCTTTCGAAAAAGTTGGGTGATTTAGCTGATAAAGCTGAAAAACTCGATGAAACAAATTTTGAGTTCAACCAAGAGGACCTTTTTAACGATTCGTTCATGATTGAAAATACAAAATTCAAGTGTTTTAGTGATTTTATTGAATCTTCTCCTGTAGATGTCCAATCCCAAGAAGATTTTGATTCGTTAAAAAATAATGAGTCATTCAACAATTTCGTTAGAGAAAATACCAAATACGAAAACTGGTCTGATATGATCGAAAATGCAGGTTCAATCCTTATTGG	343	TCH1516intergenic_1601133-1601200~~~NCTC8325intergenic_2069439-2070260~~~NCTC8325intergenic_1502932-1502986
4	n27737	1	0	589	1	1441	0	0	No	NA	NA	NA	NA	GTTAACTAAAGTTTACACCACCAATTAAAACCATGAATTGTAGCGCCAAATAATCCAAATG	61	USA300HOU_RS03360;DBGWAS_general_tag=hypothetical_protein~~~SAOUHSC_00621;DBGWAS_general_tag=hypothetical_protein
4	n30930	2030	589	589	1441	1441	0	0	No	NA	NA	NA	NA	GTTTTAATTATCAACACTGGTGATGGAAGCTACATTTCAAGAGGATAATCTCTAATTTGTTAACAAATAGCTTGTATTCACTATACTGATTTAACGTAAGATATTCTAAATAAGTCTCATAAAGCTATTG	130	NCTC8325intergenic_1547147-1547620~~~TCH1516intergenic_1644534-1645007~~~USA300HOU_RS08165;DBGWAS_general_tag=elongation_factor_P~~~SAOUHSC_01625;DBGWAS_general_tag=elongation_factor_P
4	n33277	1501	60	589	1441	1441	0	0	Yes	1.25621e-10	1.30427e-08	0.238836	-6.90118	CTCAACAATATGATATGTAGATATATACCTCTACTCATGT	40	NCTC8325intergenic_1547147-1547620~~~TCH1516intergenic_1644534-1645007
4	n38641	1560	218	589	1342	1441	0	0	No	0.97028	0.999878	-0.00117976	0.0369663	ATAAAATAAATTGGTCTAAACTCTCATTTAAGTACAATGTAGAGCCCACACCATTTGCTGTTCCATCAAAAATAACCGAATACCTTTTATTAAACTTGTCATC	103	USA300HOU_RS07680;DBGWAS_general_tag=hypothetical_protein~~~SAOUHSC_01520;DBGWAS_general_tag=SLT_orf_488-like_protein
4	n38869	2029	588	589	1441	1441	0	0	No	NA	NA	NA	NA	TACATATCATATTGTTGAGGATAAAACATAATAGCTAATA	40	NCTC8325intergenic_1547147-1547620~~~TCH1516intergenic_1644534-1645007
4	n40581	571	571	589	0	1441	0	0	Yes	1.89845e-58	5.72252e-56	-0.609478	-21.0565	GCATACTCCTTTTTCCATATTTTCCACTTTACTTACAGTGAATTTACATGTAATTTTA	58	NCTC8325intergenic_2574892-2575196~~~TCH1516intergenic_2626400-2626705
4	n42015	2026	585	589	1441	1441	0	0	No	NA	NA	NA	NA	ATATATCTACATATCATATTGTTGAGGATAA	31	NCTC8325intergenic_1547147-1547620~~~TCH1516intergenic_1644534-1645007
4	n42180	2027	586	589	1441	1441	0	0	No	NA	NA	NA	NA	TATATCTACATATCATATTGTTGAGGATAAAACATA	36	NCTC8325intergenic_1547147-1547620~~~TCH1516intergenic_1644534-1645007
4	n42316	1	0	589	1	1441	0	0	No	NA	NA	NA	NA	CTATTGATATTCTAAAAAATTAAAAATTTCTCCTCATCTAATTTATGAATTGCTATGATGA	61
4	n42355	1	1	589	0	1441	0	0	No	NA	NA	NA	NA	GAATATTTCATCATAGCAATTCATAAATTAAATGAGGCGAAATTTTTAATTTTTTAGAATA	61
4	n42356	2028	587	589	1441	1441	0	0	No	NA	NA	NA	NA	GAATATTTCATCATAGCAATTCATAAATTAGATGAGG	37
4	n42478	1	1	589	0	1441	0	0	No	NA	NA	NA	NA	GATTATAAGGAACATCAATATGTCTAAAATGCAATTGCTCAAAAACATTTGTAGAGTGAAT	61	USA300HOU_RS00565;DBGWAS_general_tag=aspartate_aminotransferase~~~SAOUHSC_00064;DBGWAS_general_tag=hypothetical_protein
4	n42887	15	10	589	5	1441	0	0	No	NA	NA	NA	NA	TGTTATCAACCTAAGGAGGTGATAAGTATGTCTGATAAAGAAATAGCTTTAGAATTAACTAAAAGTTACTTAGAACATTTAAATGTGCGAGCGAGTAGTAATAATACACATCATTCGCATACCACTGCTGAAAACACAGAAAAAATGTATCAACATTTCTATAACGTAGTATCTAAACTAGGTAACTCTGGTAAATAGTTTTTATTTTGGAGATGTAAGAGGTCTATT	228	TCH1516intergenic_1601133-1601200
4	n43036	2024	583	589	1441	1441	0	0	No	NA	NA	NA	NA	TATCCTCAACAATATGATATGTAGATATATACCT	34	NCTC8325intergenic_1547147-1547620~~~TCH1516intergenic_1644534-1645007
4	n45996	2027	586	589	1441	1441	0	0	No	NA	NA	NA	NA	AAAAATGTAGAGGTAAGATTAACTGATATTGCTGGATTCCATGCCAAAGGATATATTTTTG	61	USA300HOU_RS13490;DBGWAS_general_tag=helicase~~~SAOUHSC_02790;DBGWAS_general_tag=hypothetical_protein
4	n46380	5	5	589	0	1441	0	0	No	NA	NA	NA	NA	TCTTGAATGTTCATTTGTTATTCCTCCTTTCGTGTATAATGTTGTTATCAAC	52	NCTC8325intergenic_2069439-2070260~~~NCTC8325intergenic_1502932-1502986
4	n46974	66	43	589	23	1441	0	0	No	NA	NA	NA	NA	GCCCTGCCTCCACACTTAGAGTTTGAGATCCAACAAACACATAAGTTTTAGTAGGGTCTAGAAAAAATGTTTCGATTTCCTCTTTTGTAACAGTTTCAATTCCTTCATATCCTGGAAAAACAATTTTCTTTAAATCCGAAACATGTTTTTTTGAACCATCCTTTAAAGTAACTAGAAGTTTCATACTTATCACCTCCTTAGGTTGATA	208
4	n48295	7	7	589	0	1441	0	0	No	NA	NA	NA	NA	GATTGCTCACTCAATATTTAGATAAAGAAAACGTTACTTCTTTAGATTTACATTTAATTAA	61	USA300HOU_RS10805;DBGWAS_general_tag=hypothetical_protein~~~USA300HOU_RS07920;DBGWAS_general_tag=hypothetical_protein
4	n50507	1	1	589	0	1441	0	0	No	NA	NA	NA	NA	GAAGCCCATTCCTGTGCGACTTATTAAACGGTGGTGTAAACTTTAGTTAACAGTTAATT	59	USA300HOU_RS10960;DBGWAS_general_tag=accessory_gene_regulator_AgrB~~~SAOUHSC_02261;DBGWAS_general_tag=accessory_gene_regulator_protein_B
4	n52092	1	0	589	1	1441	0	0	No	NA	NA	NA	NA	GGTTATCAAATGTTGCAGTGGAAAGAGAAAAAATTAAATAAAAAAGATCGCTGCCATTAAA	61
4	n52709	79	79	589	0	1441	0	0	No	NA	NA	NA	NA	TTATCAACCTAAAGTAGTGATAAGTATGAAATTAGATCATGAT	43
4	n52918	3	3	589	0	1441	0	0	No	NA	NA	NA	NA	GAGATAACAACATTATACACGAAAGGAGCAGGTTTAATTGCAAGCTCAAAACAAAAAAGTCATCTATT	68	NCTC8325intergenic_2069439-2070260~~~NCTC8325intergenic_1502932-1502986
4	n56912	2018	589	589	1429	1441	0	0	No	NA	NA	NA	NA	AATGTGCAGTTCTATTTATTAAAATAAATGTAGAGATTATAAATTAATGTT	51	TCH1516intergenic_1100436-1100765~~~NCTC8325intergenic_1006364-1006693
4	n57887	44	38	589	6	1441	0	0	No	NA	NA	NA	NA	TTCGTGTATAATGTTGTTATCAACCTAAGGTAGTGATAAGTATGAAATTAGATCATGAT	59	TCH1516intergenic_1601133-1601200~~~NCTC8325intergenic_2069439-2070260~~~NCTC8325intergenic_1502932-1502986
4	n65494	2029	588	589	1441	1441	0	0	No	NA	NA	NA	NA	AGATAAAAATGGCTATAAACATAATTGAATATAATAGGTCTTA	43	USA300HOU_RS13935;DBGWAS_general_tag=N-acetyltransferase~~~SAOUHSC_02886;DBGWAS_general_tag=hypothetical_protein
4	n65495	1	1	589	0	1441	0	0	No	NA	NA	NA	NA	AGATAAAAATGGCTATAAACATAATTGAATGTAATAGGTCTTATAAGGAAGAGCTAATCGA	61	USA300HOU_RS13935;DBGWAS_general_tag=N-acetyltransferase~~~SAOUHSC_02886;DBGWAS_general_tag=hypothetical_protein
4	n66130	1	1	589	0	1441	0	0	No	NA	NA	NA	NA	ATTAAAACGAATATATGGCTATGTTAATAATACTGAAATGCCTAGTTTAAGAGTGCATATG	61	USA300HOU_RS11230;DBGWAS_general_tag=DNA-binding_response_regulator~~~SAOUHSC_02315;DBGWAS_general_tag=DNA-binding_response_regulator
4	n66131	2028	588	589	1440	1441	0	0	No	NA	NA	NA	NA	ATTAAAACGAATATATGGCTATGTTAATAAGACTGAAATGCCTAGTTTAAGAGTGCATATG	61	USA300HOU_RS11230;DBGWAS_general_tag=DNA-binding_response_regulator~~~SAOUHSC_02315;DBGWAS_general_tag=DNA-binding_response_regulator
4	n70503	7	7	589	0	1441	0	0	No	NA	NA	NA	NA	TGTTAACTAAAGTTTACACCACCAATTAATTTTATGTAATATAAATACTGCAT	53	TCH1516intergenic_2504075-2504339~~~NCTC8325intergenic_2451024-2451288
4	n71144	2029	589	589	1440	1441	0	0	No	NA	NA	NA	NA	TTATTAACATAGCCATATATTCGTTTTAATATCATCTC	38	USA300HOU_RS11230;DBGWAS_general_tag=DNA-binding_response_regulator~~~SAOUHSC_02315;DBGWAS_general_tag=DNA-binding_response_regulator
4	n71780	1592	171	589	1421	1441	0	0	No	0.638932	0.999878	0.00815455	-0.468962	TACTTTAATAACTTCACCATTAATTAAATGTAAATCTAAAGAAGTAACG	49	USA300HOU_RS10805;DBGWAS_general_tag=hypothetical_protein~~~USA300HOU_RS07920;DBGWAS_general_tag=hypothetical_protein
4	n71781	1	0	589	1	1441	0	0	No	NA	NA	NA	NA	TACTTTAATAACTTCACCATTAATTAAATGGCAGTGTGTCAATAGAAAA	49	USA300HOU_RS10805;DBGWAS_general_tag=hypothetical_protein~~~USA300HOU_RS07920;DBGWAS_general_tag=hypothetical_protein~~~TCH1516intergenic_680894-681137
4	n72081	3	3	589	0	1441	0	0	No	NA	NA	NA	NA	GCTTTAATTAAATTAAAATCATGAATTGTAACGCCAAATAATCCAAATGTATCAATAATGA	61	USA300HOU_RS03360;DBGWAS_general_tag=hypothetical_protein~~~SAOUHSC_00621;DBGWAS_general_tag=hypothetical_protein
4	n73450	1592	171	589	1421	1441	0	0	No	0.638932	0.999878	0.00815455	-0.468962	CATTTAATTAATGGTGAAGTTATTAAAGTACAAGAACATA	40	USA300HOU_RS10805;DBGWAS_general_tag=hypothetical_protein~~~USA300HOU_RS07920;DBGWAS_general_tag=hypothetical_protein
4	n75818	1	0	589	1	1441	0	0	No	NA	NA	NA	NA	TGCAGTATTTATATTACATAAAATTAATTTGAAAAGACACACCCTAATCACGTTAAATGTG	61	TCH1516intergenic_2504075-2504339~~~NCTC8325intergenic_2451024-2451288
4	n77623	1	1	589	0	1441	0	0	No	NA	NA	NA	NA	ATTTTTCTATTGACACACTGCCATTCAAAATCAAAAAATCGGACAGATGAAA	52	TCH1516intergenic_1868593-1869062~~~TCH1516intergenic_1716986-1717311~~~NCTC8325intergenic_1771403-1771872~~~NCTC8325intergenic_1619566-1619924
4	n78286	3	3	589	0	1441	0	0	No	NA	NA	NA	NA	TGCAACAGTTTGCAAATGCAGTATTTATATACATAAAATTAATTTAAAAAGACACACCC	59	TCH1516intergenic_2504075-2504339~~~NCTC8325intergenic_2451024-2451288
4	n78522	2018	578	589	1440	1441	0	0	No	NA	NA	NA	NA	TGCAGTATTTATATTACATAAAATTAATTTAAAAAGACACACCC	44	TCH1516intergenic_2504075-2504339~~~NCTC8325intergenic_2451024-2451288
4	n78753	1589	171	589	1418	1441	0	0	No	0.713423	0.999878	0.00629228	-0.367073	ATATGTTCTTGTACTTTAATAACTTCACCAT	31	USA300HOU_RS10805;DBGWAS_general_tag=hypothetical_protein~~~USA300HOU_RS07920;DBGWAS_general_tag=hypothetical_protein
4	n79039	1	1	589	0	1441	0	0	No	NA	NA	NA	NA	GCAACAGTTGCGGGTCAAATTATTATGGGTATCATTATTGATACATTTGGATTATTTGGCG	61	USA300HOU_RS03360;DBGWAS_general_tag=hypothetical_protein~~~SAOUHSC_00621;DBGWAS_general_tag=hypothetical_protein
4	n79585	2017	584	589	1433	1441	0	0	No	NA	NA	NA	NA	TCATTATTGATACATTTGGATTATTTGGCGCTACAATTCATG	42	USA300HOU_RS03360;DBGWAS_general_tag=hypothetical_protein~~~SAOUHSC_00621;DBGWAS_general_tag=hypothetical_protein
4	n80540	1	0	589	1	1441	0	0	No	NA	NA	NA	NA	ATGGTGAAGTTATTAAAGTACAAGAACATACG	32	USA300HOU_RS10805;DBGWAS_general_tag=hypothetical_protein~~~USA300HOU_RS07920;DBGWAS_general_tag=hypothetical_protein
4	n81050	2019	586	589	1433	1441	0	0	No	NA	NA	NA	NA	CGCCAAATAATCCAAATGTATCAATAATGACACCCATAATAATTTGA	47	USA300HOU_RS03360;DBGWAS_general_tag=hypothetical_protein~~~SAOUHSC_00621;DBGWAS_general_tag=hypothetical_protein
4	n81165	1417	102	589	1315	1441	0	0	No	0.340508	0.999878	-0.012156	0.954341	ATGTGTAGAGTTTTGCTTTCAGCATCTTTCATATGTTCTTGTACTTTAATAACTTCACCA	60	USA300HOU_RS10805;DBGWAS_general_tag=hypothetical_protein~~~USA300HOU_RS07920;DBGWAS_general_tag=hypothetical_protein
4	n81815	1386	143	589	1243	1441	0	0	No	0.0489563	0.999878	0.018123	-1.96901	GATGTGTAGAGTTTTGCTTTCAGCATCTTTTATATGTTCTTGTACTTTAATAACTTCACCA	61	USA300HOU_RS10805;DBGWAS_general_tag=hypothetical_protein~~~USA300HOU_RS07920;DBGWAS_general_tag=hypothetical_protein
4	n82099	0	0	589	0	1441	0	0	No	NA	NA	NA	NA	TGGTGAAGTTATTAAAGTACAAGAACATATCAAAGATGCTGAAAGCAAAACTCTACACATC	61	USA300HOU_RS10805;DBGWAS_general_tag=hypothetical_protein~~~USA300HOU_RS07920;DBGWAS_general_tag=hypothetical_protein
4	n87921	590	579	589	11	1441	0	0	Yes	9.7017e-12	1.10523e-09	-0.154878	-7.44351	GTAACAATACTCCAATTGCTTTAATTAAATTAAAATCATG	40	SAOUHSC_00621;DBGWAS_general_tag=hypothetical_protein
4	n87922	1437	8	589	1429	1441	0	0	Yes	5.73414e-13	7.17612e-11	0.16957	-7.92509	GTAACAATACTCCAATTGCTTTAATTAAATGGCAGTGTGTCAATAGAAAA	50	SAOUHSC_00621;DBGWAS_general_tag=hypothetical_protein~~~TCH1516intergenic_680894-681137
4	n87927	1	1	589	0	1441	0	0	No	NA	NA	NA	NA	TTATGACGATGCCGACAATGAGTAACAATATTCCAATTGCTTTAATTAAATTAAAATCATG	61	SAOUHSC_00621;DBGWAS_general_tag=hypothetical_protein~~~USA300HOU_RS03280;DBGWAS_general_tag=hypothetical_protein
4	n90316	2028	587	589	1441	1441	0	0	No	NA	NA	NA	NA	ATTTAATTAAAGCAATTGGAGTATTGTTACTCATTGTC	38	SAOUHSC_00621;DBGWAS_general_tag=hypothetical_protein
4	n90434	1	1	589	0	1441	0	0	No	NA	NA	NA	NA	CAACTTAATAGGAGGAATTATCAATGAACATTCAAGAAGCAACTAAGATAGC	52	SAOUHSC_01573;DBGWAS_general_tag=hypothetical_protein
4	n90577	2029	588	589	1441	1441	0	0	No	NA	NA	NA	NA	CTATCAATTCTTTGATTGTATTGAATATTTCATCATAGCAATTCATAAATTA	52	USA300HOU_RS06595;DBGWAS_general_tag=hypothetical_protein~~~SAOUHSC_01288;DBGWAS_general_tag=hypothetical_protein
4	n91240	1	0	589	1	1441	0	0	No	NA	NA	NA	NA	AATTCATCATTTAAAACCAATGTTTTCAATGGCAGTGTGTCAATAGAAAAATGAG	55	TCH1516intergenic_680894-681137~~~USA300HOU_RS00235;DBGWAS_general_tag=HNH_endonuclease
4	n93681	1	1	589	0	1441	0	0	No	NA	NA	NA	NA	AAAGCAATTGGAGTATTGTTACTCATTGTCTGCATCGTCATAATGAATCAATTTAACAAGA	61	SAOUHSC_00621;DBGWAS_general_tag=hypothetical_protein~~~USA300HOU_RS03280;DBGWAS_general_tag=hypothetical_protein
4	n93682	1	0	589	1	1441	0	0	No	NA	NA	NA	NA	AAGCAATTGGAGTATTGTTACTCATTGTCGTCATCGTCATAATGAATCAATTTAACAAGAA	61	SAOUHSC_00621;DBGWAS_general_tag=hypothetical_protein~~~USA300HOU_RS03280;DBGWAS_general_tag=hypothetical_protein
4	n93683	2027	587	589	1440	1441	0	0	No	NA	NA	NA	NA	TATTGTTACTCATTGTCGGCATCGTCATAATGAATCAATTTAACAAGA	48	SAOUHSC_00621;DBGWAS_general_tag=hypothetical_protein~~~USA300HOU_RS03280;DBGWAS_general_tag=hypothetical_protein
4	n94244	2026	586	589	1440	1441	0	0	No	NA	NA	NA	NA	TTATGACGATGCCGACAATGAGTAACAATACTCCAATTGCTT	42	SAOUHSC_00621;DBGWAS_general_tag=hypothetical_protein~~~USA300HOU_RS03280;DBGWAS_general_tag=hypothetical_protein
4	n95959	591	580	589	11	1441	0	0	Yes	6.99339e-13	8.71314e-11	-0.172176	-7.90405	TACAATTCATGATTTTAATTTAATTAAAGCAATTGGA	37	SAOUHSC_00621;DBGWAS_general_tag=hypothetical_protein
4	n102420	1585	164	589	1421	1441	0	0	No	0.617853	0.999878	0.00868273	-0.498656	AAGAAATCGTTACTTCTTTAGATTTACATTTAATTAA	37	USA300HOU_RS10805;DBGWAS_general_tag=hypothetical_protein~~~USA300HOU_RS07920;DBGWAS_general_tag=hypothetical_protein
4	n102421	1	0	589	1	1441	0	0	No	NA	NA	NA	NA	AAGAAATCGTTACTTCTTTAGATTTACATTGGTGGTGTAAACTTTAGTTAACAGTT	56	USA300HOU_RS10805;DBGWAS_general_tag=hypothetical_protein~~~USA300HOU_RS07920;DBGWAS_general_tag=hypothetical_protein
4	n102626	1	1	589	0	1441	0	0	No	NA	NA	NA	NA	CTCTATATTAAATTCATTTGCTAATTTAATGGCAGTGTGTCAATAGAAAAATG	53	USA300HOU_RS09605;DBGWAS_general_tag=NTPase~~~SAOUHSC_01931;DBGWAS_general_tag=hypothetical_protein
4	n102754	1	1	589	0	1441	0	0	No	NA	NA	NA	NA	TTCATAAATTAGATGAGGCGAAATTTTTAAATTTTTAGAATATCAATAGTAGTATAACTAA	61	TCH1516intergenic_1338065-1338557~~~NCTC8325intergenic_1244148-1244640
4	n105660	1	1	589	0	1441	0	0	No	NA	NA	NA	NA	AGAAAGCTAATATCAATAATGCTGCCGGTGAAGATAATTGAAAATCTAATCCTGGTATAAT	61	USA300HOU_RS13110;DBGWAS_general_tag=hypothetical_protein~~~SAOUHSC_02711;DBGWAS_general_tag=hypothetical_protein
4	n108250	3	0	589	3	1441	0	0	No	NA	NA	NA	NA	AGAAGGAGTTGGATCGCTAAAGAAAATATCCCTAAAGATATCATCTTCAATGATAGGAATA	61	USA300HOU_RS00565;DBGWAS_general_tag=aspartate_aminotransferase~~~SAOUHSC_00064;DBGWAS_general_tag=hypothetical_protein
4	n109261	1	0	589	1	1441	0	0	No	NA	NA	NA	NA	TGTTAACTAAAGTTTACACCACCACATAAAAAAATAGGCAAGTACCGAAGTAC	53
4	n110242	2	2	589	0	1441	0	0	No	NA	NA	NA	NA	AAAAATGTAGAGGTAAGATTAACTGATATTTCTGGATTCCATGCCAAAGGATATATTTTTG	61	USA300HOU_RS13490;DBGWAS_general_tag=helicase~~~SAOUHSC_02790;DBGWAS_general_tag=hypothetical_protein
4	n110269	2	2	589	0	1441	0	0	No	NA	NA	NA	NA	TCTCATTTTTCTATTGACACACTGCCATTGCACGTGTGTCAAAAGGACGTACGATT	56	TCH1516intergenic_680894-681137~~~USA300HOU_RS11845;DBGWAS_general_tag=glycine/betaine_ABC_transporter_permease~~~SAOUHSC_02444;DBGWAS_general_tag=BCCT_family_osmoprotectant_transporter
4	n110559	2023	586	589	1437	1441	0	0	No	NA	NA	NA	NA	AATCGTACGTCCTTTTGACACACGTGCAATAAATATACCTACAAATG	47	USA300HOU_RS11845;DBGWAS_general_tag=glycine/betaine_ABC_transporter_permease~~~SAOUHSC_02444;DBGWAS_general_tag=BCCT_family_osmoprotectant_transporter
4	n110682	2030	589	589	1441	1441	0	0	No	NA	NA	NA	NA	TTTTTTACATTTTCTAAAATTTTAATATCTCAGCTTCTTCAATTTAATTTGCCCGTGGCACACTGTTGGTTGATATAGTTTAGATTGGTCCTAGATAGAGTGTGATGTGTGGAACTAACAACAGCTCTCATCTCTCGTAACGGTTTCAAATTCTATTTTAGAATGACTCCTTCTTTCAACTATCATTGCAAACAG	195	TCH1516intergenic_368566-368843~~~NCTC8325intergenic_310582-310859
4	n111543	2014	575	589	1439	1441	0	0	No	NA	NA	NA	NA	TTGATACCATCATTGATAGATTTATTAATTTTAAAAATAAAGCGA	45	USA300HOU_RS00565;DBGWAS_general_tag=aspartate_aminotransferase~~~SAOUHSC_00064;DBGWAS_general_tag=hypothetical_protein
4	n111935	1	1	589	0	1441	0	0	No	NA	NA	NA	NA	TCAAATTATTATGGGTGTCATTATTGATACGTTTGGATTATTTGGCGCTACAATTCATGAT	61	USA300HOU_RS03360;DBGWAS_general_tag=hypothetical_protein~~~SAOUHSC_00621;DBGWAS_general_tag=hypothetical_protein
4	n112053	2029	589	589	1440	1441	0	0	No	NA	NA	NA	NA	CCTTTAATTCTTTCTTAACATTAATTTATAATCTCTACATTTATTT	46	TCH1516intergenic_1100436-1100765~~~NCTC8325intergenic_1006364-1006693
4	n117233	1	0	589	1	1441	0	0	No	NA	NA	NA	NA	TGCGTTATTAATAGATAAACGAACATTTTTAAAGGATCAATATACACCAATATCA	55
4	n118357	1	0	589	1	1441	0	0	No	NA	NA	NA	NA	TATTCTTAAACTGGTATAATAAATTTATGTGGTGGTGTAAACTTTAGTTAACA	53	TCH1516intergenic_863471-863810~~~NCTC8325intergenic_783361-783700
4	n121082	52	51	589	1	1441	0	0	No	NA	NA	NA	NA	TTAAAGGATCAATATACACCAATATCACCTACTTTCACTAGGAGATAACAACATTATACAC	61	NCTC8325intergenic_2068365-2068423~~~TCH1516intergenic_2121647-2121705
4	n121084	33	27	589	6	1441	0	0	No	NA	NA	NA	NA	AATATCACCTCCTTAGGTTGATAACAACATTA	32	TCH1516intergenic_1601133-1601200~~~NCTC8325intergenic_2069439-2070260~~~NCTC8325intergenic_1502932-1502986
4	n121086	200	190	589	10	1441	0	0	No	NA	NA	NA	NA	CAATATCACCTCCTTTCACTAGGAGATAACAAC	33	NCTC8325intergenic_2068365-2068423~~~TCH1516intergenic_2121647-2121705
4	n123835	1	0	589	1	1441	0	0	No	NA	NA	NA	NA	CACCTCCTTAGGTTGATAACAACATTATACTCGAAAGGTGGAACAACAAATGAACGAAGAA	61	TCH1516intergenic_1601133-1601200~~~NCTC8325intergenic_2069439-2070260~~~NCTC8325intergenic_1502932-1502986
4	n124229	26	23	589	3	1441	0	0	No	NA	NA	NA	NA	ACCAATATCACCTCCTTAGGTTGATAACAACAT	33	TCH1516intergenic_1601133-1601200~~~NCTC8325intergenic_2069439-2070260~~~NCTC8325intergenic_1502932-1502986
4	n126208	2016	575	589	1441	1441	0	0	No	NA	NA	NA	NA	ATAGATTTATTAATTTTAAAAATAAAGCGATTTATATAGAAC	42	USA300HOU_RS00565;DBGWAS_general_tag=aspartate_aminotransferase~~~SAOUHSC_00064;DBGWAS_general_tag=hypothetical_protein
4	n126546	1	1	589	0	1441	0	0	No	NA	NA	NA	NA	ATTTGATAGAAAATCTACTCTTTTATTTACAGGTCCTTTCTTATCTCTCATTTGCATACTC	61	USA300HOU_RS15580;DBGWAS_general_tag=YSIRK_signal_domain/LPXTG_anchor_domain_surface_protein~~~SAOUHSC_02798;DBGWAS_general_tag=hypothetical_protein
4	n126547	2018	577	589	1441	1441	0	0	No	NA	NA	NA	NA	ATAGAAAATCTACTCTTTTATTTACCGGTCCTTTCTTATCTCTC	44	USA300HOU_RS15580;DBGWAS_general_tag=YSIRK_signal_domain/LPXTG_anchor_domain_surface_protein~~~SAOUHSC_02798;DBGWAS_general_tag=hypothetical_protein
4	n126548	1	1	589	0	1441	0	0	No	NA	NA	NA	NA	TATTTGATAGAAAATCTACTCTTTTATTTATCGGTCCTTTCTTATCTCTCATTTGCATACT	61	USA300HOU_RS15580;DBGWAS_general_tag=YSIRK_signal_domain/LPXTG_anchor_domain_surface_protein~~~SAOUHSC_02798;DBGWAS_general_tag=hypothetical_protein
4	n129656	74	40	589	34	1441	0	0	No	NA	NA	NA	NA	TTAAAAAAGATTCATGAAATAGCAGTAAAAATCATCGAACTAGCAGAAAAAGAAAAATGGAGCGAAGAGGAATTACTAACGACAATAGACCTCTTACATCTCCAAAATAAAAA	113
4	n131093	3	3	589	0	1441	0	0	No	NA	NA	NA	NA	CAAGTGTTTTTAATTTAAAATGTGGTTTTAATATAACTTTGGGATAGACTTATAATGTCGC	61	NCTC8325intergenic_1547147-1547620~~~TCH1516intergenic_1644534-1645007
4	n131094	2026	585	589	1441	1441	0	0	No	NA	NA	NA	NA	ATTTAAAATGTGGTTTTATTATAACTTTGGGATAGACT	38	NCTC8325intergenic_1547147-1547620~~~TCH1516intergenic_1644534-1645007
4	n132022	65	42	589	23	1441	0	0	No	NA	NA	NA	NA	GATCTCAAACTCTAAGTGTGGAGGCAGGGCAAATCCTTACCGTTGAATTTAGCTAACCTTT	61
4	n132023	1	1	589	0	1441	0	0	No	NA	NA	NA	NA	GATCTCAAACTCTAAGTGTGGAGGCAGGGCGAATCCTTACCGTTGAATTTAGCTAACCTTT	61
4	n133893	2030	589	589	1441	1441	0	0	No	NA	NA	NA	NA	CTAAAGATATCATCTTCAATGATAGGAATATTATGTCTTTCGCTATAAGTAATTATATTTTTCTTTTGCTCATTCGTTAAAGAACGAC	88	USA300HOU_RS00565;DBGWAS_general_tag=aspartate_aminotransferase~~~SAOUHSC_00064;DBGWAS_general_tag=hypothetical_protein
4	n134371	3	0	589	3	1441	0	0	No	NA	NA	NA	NA	TATCTCCTAGTGAAAGGAGGTGATAAGTATACATAAGAGATTG	43	TCH1516intergenic_2121647-2121705
4	n134372	1432	103	589	1329	1441	0	0	No	0.45016	0.999878	-0.0116519	0.755478	GAAAGGAGGTGATAAGTATGCATAAGAGATTG	32
4	n134665	2028	588	589	1440	1441	0	0	No	NA	NA	NA	NA	TAATATTTTCCCTTTAACACCCTTATTGCTTAAATCTAATAGTTGAGCCTTTAAGCTGG	59	USA300HOU_RS13490;DBGWAS_general_tag=helicase~~~SAOUHSC_02790;DBGWAS_general_tag=hypothetical_protein
4	n134666	1	0	589	1	1441	0	0	No	NA	NA	NA	NA	TAATATTTTCCCTTTAACACCCTTATTGCTGAAATCTAATAGTTGAGCCTTTAAGCTGGCT	61	USA300HOU_RS13490;DBGWAS_general_tag=helicase~~~SAOUHSC_02790;DBGWAS_general_tag=hypothetical_protein
4	n135485	2028	587	589	1441	1441	0	0	No	NA	NA	NA	NA	TATAACTTTGGGATAGACTTATAATGTCGCCAGCAA	36	NCTC8325intergenic_1547147-1547620~~~TCH1516intergenic_1644534-1645007
4	n135486	1	1	589	0	1441	0	0	No	NA	NA	NA	NA	TGTGGTTTTATTATAACTTTGGGATAGACTGATAATGTCGCCAGCAATATGAACATGCTTG	61	NCTC8325intergenic_1547147-1547620~~~TCH1516intergenic_1644534-1645007
4	n135967	2029	588	589	1441	1441	0	0	No	NA	NA	NA	NA	AGCAATAAGGGTGTTAAAGGGAAAATATTAACATCTAATTACTT	44	USA300HOU_RS13490;DBGWAS_general_tag=helicase~~~SAOUHSC_02790;DBGWAS_general_tag=hypothetical_protein
4	n136402	16	10	589	6	1441	0	0	No	NA	NA	NA	NA	CTTAATAGGAGGAAAACAAATGCAAGATTTAAAAAAGATTCATGAAATAGCAGTAAAA	58
4	n136664	7	7	589	0	1441	0	0	No	NA	NA	NA	NA	CAATCTCTTATGCATACTTATCACCTCCTTAGGTTGATAACA	42	TCH1516intergenic_1601133-1601200
4	n136665	1476	139	589	1337	1441	0	0	Yes	6.52953e-05	0.00404961	0.0851312	-4.00661	CAATCTCTTATGTATACTTATCACCTCCTTAGGTTGATAACAA	43	TCH1516intergenic_1601133-1601200~~~NCTC8325intergenic_2069439-2070260
4	n137023	2019	581	589	1438	1441	0	0	No	NA	NA	NA	NA	ATTCTATAGTACAAAAATTCGCAAAAAAGGGAAACAAATGTTATCTTAAAA	51	TCH1516intergenic_2255322-2255636~~~NCTC8325intergenic_2201850-2202164
4	n137160	1	1	589	0	1441	0	0	No	NA	NA	NA	NA	AATTTTTATATTAAATTCATTTTTTTGAATGGCAGTGTGTCAATAGAAAAAT	52
4	n137161	2	0	589	2	1441	0	0	No	NA	NA	NA	NA	CTATCAATTTTTATATTAAATTCATTTTTTGAATCGATAAAATAAACTCGATTA	54	USA300HOU_RS13935;DBGWAS_general_tag=N-acetyltransferase~~~SAOUHSC_02886;DBGWAS_general_tag=hypothetical_protein
4	n138068	1466	139	589	1327	1441	0	0	Yes	0.000693074	0.0363158	0.0559662	-3.39877	AAGGAGGTGATAAGTATACATAAGAGATTGCTCACTCAATATTTAGAT	48	USA300HOU_RS10805;DBGWAS_general_tag=hypothetical_protein
4	n138090	1439	110	589	1329	1441	0	0	No	0.452309	0.999878	-0.0111605	0.751701	AAGGAGGTGATAAGTATGCATAAGAGATTGCTCACTCAATATTTAG	46	USA300HOU_RS10805;DBGWAS_general_tag=hypothetical_protein
4	n138128	2025	584	589	1441	1441	0	0	No	NA	NA	NA	NA	GCGACATTATAAGTCTATCCCAAAGTTATAATAAAACCACA	41	NCTC8325intergenic_1547147-1547620~~~TCH1516intergenic_1644534-1645007
4	n138494	1	0	589	1	1441	0	0	No	NA	NA	NA	NA	TTCTCATTTTTCTATTGACACACTGCCATAAAATAAATTGGTCTAAACTCTCATTTA	57	USA300HOU_RS07680;DBGWAS_general_tag=hypothetical_protein~~~SAOUHSC_01520;DBGWAS_general_tag=SLT_orf_488-like_protein~~~TCH1516intergenic_680894-681137
4	n138903	1	1	589	0	1441	0	0	No	NA	NA	NA	NA	ACATGAGTAGAGGTATATATCTACATATCACATTGTTGAGGATAAAACATAATAGCTAATA	61	NCTC8325intergenic_1547147-1547620~~~TCH1516intergenic_1644534-1645007
4	n140856	9	3	589	6	1441	0	0	No	NA	NA	NA	NA	ACTTATCTTTATAAAATTATTTTATATATTTACGCACTTAAAACAATCTACAAATAAAATT	61	NCTC8325intergenic_2574892-2575196~~~TCH1516intergenic_2626400-2626705
4	n144502	1	1	589	0	1441	0	0	No	NA	NA	NA	NA	AAAAATTATTTTAAAAATAAAAAGCCTCATGTCAGCATATAACCTATAATCATTTTAGGCA	61	NCTC8325intergenic_1547147-1547620~~~TCH1516intergenic_1644534-1645007
4	n145431	1	0	589	1	1441	0	0	No	NA	NA	NA	NA	TAAAGGGAAAATATTAACATCTAATTACTTGGGGTTTAATAGTCCTAAAATGTATGGAGAA	61	USA300HOU_RS13490;DBGWAS_general_tag=helicase~~~SAOUHSC_02790;DBGWAS_general_tag=hypothetical_protein
4	n149364	1	1	589	0	1441	0	0	No	NA	NA	NA	NA	AATCCCTTTTTCAACATTTGGAATATCAATGGCAGTGTGTCAATAGAAAAATG	53	USA300HOU_RS13620;DBGWAS_general_tag=MFS_transporter~~~SAOUHSC_02818;DBGWAS_general_tag=hypothetical_protein
4	n154992	1	1	589	0	1441	0	0	No	NA	NA	NA	NA	ATAGATGACTTTTTTGTTTTGAGCTTGCATCATGTTTATGCCTCCTTTCGTGTATAATGTTGTTATCAAC	70	NCTC8325intergenic_2069439-2070260~~~NCTC8325intergenic_1502932-1502986
4	n157604	1	1	589	0	1441	0	0	No	NA	NA	NA	NA	TGTTCTTTGGGCGTTAATGGGTTTTTATCTGGCAGTGTGTCAATAGAAAAA	51	USA300HOU_RS06720;DBGWAS_general_tag=DNA-binding_response_regulator~~~SAOUHSC_01314;DBGWAS_general_tag=hypothetical_protein
4	n159242	1485	142	589	1343	1441	0	0	No	0.957293	0.999878	0.0014862	-0.0535	GACGTTCATTTTCTGTTAAAGATTCTACTGACGCATGATCTCTTCTGAAAATCCTTGGTATGATTATGTCTAACCCTTCTGATTTTTTGTTCATT	95	USA300HOU_RS07915;DBGWAS_general_tag=hypothetical_protein
4	n160506	2	2	589	0	1441	0	0	No	NA	NA	NA	NA	TTCAAATAAAACAGTTGTTGTTTTATCAATGGCAGTGTGTCAATAGAAAAATG	53	USA300HOU_RS03365;DBGWAS_general_tag=hypothetical_protein~~~SAOUHSC_00622;DBGWAS_general_tag=hypothetical_protein
4	n161223	64	59	589	5	1441	0	0	No	NA	NA	NA	NA	TATCAAATTCATCAGATATCAAGGGCATGTTATCACCTCCTTAGGTTG	48
4	n161224	17	17	589	0	1441	0	0	No	NA	NA	NA	NA	TCTTTAGTAAGTGTATCAAATTCATCAGATGTCAAGGGCATGTTATCACCTCCTTAGGTTG	61	SAOUHSC_01572;DBGWAS_general_tag=hypothetical_protein
4	n161292	1	1	589	0	1441	0	0	No	NA	NA	NA	NA	TTATTCCTATAGATTTTGATACTATTCAAATTTAGGGACTTTTCAGGGGCCCGAAATCCT	60	TCH1516intergenic_1181433-1181907~~~NCTC8325intergenic_1087531-1088005
4	n165806	81	76	589	5	1441	0	0	No	NA	NA	NA	NA	TCAAGGGCATGTTATCACCTCCTTAGGTTGATAACAACATT	41	TCH1516intergenic_1601133-1601200~~~NCTC8325intergenic_2069439-2070260~~~NCTC8325intergenic_1502932-1502986
4	n165940	7	7	589	0	1441	0	0	No	NA	NA	NA	NA	AGTTTACACCACCTATGGCAGTGTGTCAATAGAAAAATGAGA	42	TCH1516intergenic_680894-681137
4	n168209	53	48	589	5	1441	0	0	No	NA	NA	NA	NA	TTATATGGCAGTGTGTCAATAGAAAAATGAGAA	33	TCH1516intergenic_680894-681137
4	n168657	2	2	589	0	1441	0	0	No	NA	NA	NA	NA	TTTTTATCTGGCAGTGTGTCAATAGAAAAATGAGAATT	38	TCH1516intergenic_680894-681137
4	n168777	11	11	589	0	1441	0	0	No	NA	NA	NA	NA	TATTATATGGCAGTGTGTCAATAGAAAAATGA	32
4	n168939	9	7	589	2	1441	0	0	No	NA	NA	NA	NA	ATTCTCATTTTTCTATTGACACACTGCCAAA	31	TCH1516intergenic_680894-681137
4	n168940	2	2	589	0	1441	0	0	No	NA	NA	NA	NA	ATTCTCATTTTTCTATTGACACACTGCCAAC	31	TCH1516intergenic_680894-681137
4	n168941	58	50	589	8	1441	0	0	No	NA	NA	NA	NA	ATTCTCATTTTTCTATTGACACACTGCCAAT	31	TCH1516intergenic_680894-681137
4	n168942	3	2	589	1	1441	0	0	No	NA	NA	NA	NA	ATTCTCATTTTTCTATTGACACACTGCCAAG	31	TCH1516intergenic_680894-681137
4	n168943	4	1	589	3	1441	0	0	No	NA	NA	NA	NA	ATTCTCATTTTTCTATTGACACACTGCCACATAAAAAAA	39	TCH1516intergenic_680894-681137
4	n168944	5	2	589	3	1441	0	0	No	NA	NA	NA	NA	ATTCTCATTTTTCTATTGACACACTGCCACT	31	TCH1516intergenic_680894-681137
4	n168945	85	66	589	19	1441	0	0	No	NA	NA	NA	NA	ATTCTCATTTTTCTATTGACACACTGCCATA	31	TCH1516intergenic_680894-681137
4	n169054	3	3	589	0	1441	0	0	No	NA	NA	NA	NA	AAGCAATCATACTACTTCTCAATTTAGTATGGCAGTGTGTCAATAGAAAAATGAGA	56	TCH1516intergenic_680894-681137~~~TCH1516intergenic_2628130-2628340~~~NCTC8325intergenic_2576622-2576832
4	n169150	1	1	589	0	1441	0	0	No	NA	NA	NA	NA	GACCGGTAAATAAAAGAGTAGATTTTCTATGGCAGTGTGTCAATAGAAAAAT	52	USA300HOU_RS15580;DBGWAS_general_tag=YSIRK_signal_domain/LPXTG_anchor_domain_surface_protein~~~SAOUHSC_02798;DBGWAS_general_tag=hypothetical_protein
4	n169162	1	1	589	0	1441	0	0	No	NA	NA	NA	NA	AATAGGGATGTTAATTTTTTATTTTTATCTGGCAGTGTGTCAATAGAAAAA	51
4	n170198	2	2	589	0	1441	0	0	No	NA	NA	NA	NA	CATTTTTCTATTGACACACTGCCATAGAAAA	31
4	n170420	10	9	589	1	1441	0	0	No	NA	NA	NA	NA	CTATGGCAGTGTGTCAATAGAAAAATGAGAA	31	TCH1516intergenic_680894-681137
4	n170437	3	2	589	1	1441	0	0	No	NA	NA	NA	NA	TCTCATTTTTCTATTGACACACTGCCATAGAAA	33	TCH1516intergenic_680894-681137
4	n170804	42	37	589	5	1441	0	0	No	NA	NA	NA	NA	TCATTTTTCTATTGACACACTGCCATATAAA	31
4	n170827	17	5	589	12	1441	0	0	No	NA	NA	NA	NA	TCTCATTTTTCTATTGACACACTGCCATACA	31	TCH1516intergenic_680894-681137
4	n170886	20	8	589	12	1441	0	0	No	NA	NA	NA	NA	TTCTCATTTTTCTATTGACACACTGCCATAC	31	TCH1516intergenic_680894-681137
4	n174497	2	2	589	0	1441	0	0	No	NA	NA	NA	NA	CTCATTTAAATTTTACCGTTTCATATAAAACCCTTTAATTCTTTCTTAACATTAATTTATA	61	TCH1516intergenic_1100436-1100765~~~NCTC8325intergenic_1006364-1006693
4	n175337	1	1	589	0	1441	0	0	No	NA	NA	NA	NA	CTCCTAGTGAAAGGAGGTGATAAGTATGGACATAATCGCG	40
4	n175967	267	257	589	10	1441	0	0	No	0.906064	0.999878	-0.00288493	-0.118122	TTATCAACCTAAGGAGGTGATAAGTATGGACATAATCGCG	40
4	n179998	1	1	589	0	1441	0	0	No	NA	NA	NA	NA	TTCATAAATTAGATGAGGCGAAATTTTTAACTTTTTAGAATATCAATAGTAGTATAACTAA	61	TCH1516intergenic_1338065-1338557~~~NCTC8325intergenic_1244148-1244640
4	n180086	1	1	589	0	1441	0	0	No	NA	NA	NA	NA	TCTCATTTTTCTATTGACACACTGCCATTCCAAAGAAAGCTAATATCAATAATGCT	56	USA300HOU_RS13110;DBGWAS_general_tag=hypothetical_protein~~~SAOUHSC_02711;DBGWAS_general_tag=hypothetical_protein~~~TCH1516intergenic_680894-681137
4	n184007	2029	589	589	1440	1441	0	0	No	NA	NA	NA	NA	AAAAAGATCACTGCCAATCATTCGTTTAATGGCAGCGATCTTTTT	45	TCH1516intergenic_2201270-2201638~~~NCTC8325intergenic_2147798-2148166
4	n185233	1382	145	589	1237	1441	0	0	No	0.762672	0.999878	0.00319754	-0.301836	TTAAAAGGAGGAACAACAAATGAACGAAGAAAAATTAAA	39	TCH1516intergenic_1601419-1601675
4	n185234	1422	102	589	1320	1441	0	0	No	0.335126	0.999878	-0.0135823	0.963563	ACATCTTAAAAGGAGGAATAACAAATGAACGAAGAAAAATTAAAGATGA	49	TCH1516intergenic_1601419-1601675~~~TCH1516intergenic_2121936-2122124
4	n187365	1	0	589	1	1441	0	0	No	NA	NA	NA	NA	CGAAAGGTGGAACAACAAATGAACGAAGAAAAATTAAA	38	TCH1516intergenic_1601419-1601675
4	n188494	2020	587	589	1433	1441	0	0	No	NA	NA	NA	NA	AATAATTTGAGCAGAATGTACTTTGGTGATAG	32	USA300HOU_RS03365;DBGWAS_general_tag=hypothetical_protein~~~SAOUHSC_00622;DBGWAS_general_tag=hypothetical_protein
4	n188505	2020	587	589	1433	1441	0	0	No	NA	NA	NA	NA	GTATCAATAATGACACCCATAATAATTTGACCCGCAACTGTTGC	44	USA300HOU_RS03360;DBGWAS_general_tag=hypothetical_protein~~~SAOUHSC_00621;DBGWAS_general_tag=hypothetical_protein
4	n188927	2	0	589	2	1441	0	0	No	NA	NA	NA	NA	AATCATTCGTTTAATGGCAGCGATCTTTTTATTTAATTATTTCTCTTTCCACTGC	55	TCH1516intergenic_2201270-2201638~~~NCTC8325intergenic_2147798-2148166
4	n189292	1731	290	589	1441	1441	0	0	No	0.818474	0.999878	0.00815266	-0.22936	TCAATTCCTTTCATAAGAATTAACTGTTAACTA	33	TCH1516intergenic_694219-694254
4	n192832	2019	586	589	1433	1441	0	0	No	NA	NA	NA	NA	ATCACCAAAGTACATTCTGCTCAAATTATTG	31	USA300HOU_RS03365;DBGWAS_general_tag=hypothetical_protein~~~SAOUHSC_00622;DBGWAS_general_tag=hypothetical_protein
4	n194386	2	2	589	0	1441	0	0	No	NA	NA	NA	NA	ACTGTTAACTAAAGTTTACACCACCAATAATTTGAGCAGAATGTACTTTGGTGA	54	USA300HOU_RS03365;DBGWAS_general_tag=hypothetical_protein~~~SAOUHSC_00622;DBGWAS_general_tag=hypothetical_protein
4	n194839	2017	584	589	1433	1441	0	0	No	NA	NA	NA	NA	TTGTTTTATCAATAATTTGAGCAGAATGTACTTTGGTGA	39	USA300HOU_RS03365;DBGWAS_general_tag=hypothetical_protein~~~SAOUHSC_00622;DBGWAS_general_tag=hypothetical_protein
4	n197637	2030	589	589	1441	1441	0	0	No	NA	NA	NA	NA	AAATATTCAATACAATCAAAGAATTGATAGAAAACAAAGAGATATCGAGTTATCAAAT	58	USA300HOU_RS06595;DBGWAS_general_tag=hypothetical_protein~~~SAOUHSC_01288;DBGWAS_general_tag=hypothetical_protein
4	n198134	2017	578	589	1439	1441	0	0	No	NA	NA	NA	NA	TTGTAAATTTTTATTACATAGTATCCTAAGTTATATCCTGAC	42	TCH1516intergenic_168320-168692~~~NCTC8325intergenic_113710-114082
4	n198899	1	0	589	1	1441	0	0	No	NA	NA	NA	NA	TAAGCAAAGTGGAAAATATGGAAAAAGGAGAATGCAAATGAGAGATAAGAAAGGACCGGTA	61	TCH1516intergenic_2626400-2626705
4	n198920	5	1	589	4	1441	0	0	No	NA	NA	NA	NA	ATTATACACGAAAGGAGATATAACAAATGAACATTCAAAAAGTAATGAA	49
4	n199214	2029	588	589	1441	1441	0	0	No	NA	NA	NA	NA	GATTATAAGGAACATCAATATGTCTAAAATTCAATTGCTCAAAAACATTTGTAGAGTGAAT	61	USA300HOU_RS00565;DBGWAS_general_tag=aspartate_aminotransferase~~~SAOUHSC_00064;DBGWAS_general_tag=hypothetical_protein
4	n200876	1	1	589	0	1441	0	0	No	NA	NA	NA	NA	CTATCAATTCTTTGATTGTATTGAATATTTAATCATAGCAATTCATAAATTAGATGAGGCG	61	USA300HOU_RS06595;DBGWAS_general_tag=hypothetical_protein~~~SAOUHSC_01288;DBGWAS_general_tag=hypothetical_protein
4	n201056	2030	589	589	1441	1441	0	0	No	NA	NA	NA	NA	AATGATGGTATCAATTTCATTAATTTGATTATAAGGAACATCAATATGTCTAAAAT	56	USA300HOU_RS00565;DBGWAS_general_tag=aspartate_aminotransferase~~~SAOUHSC_00064;DBGWAS_general_tag=hypothetical_protein
4	n201589	1447	8	589	1439	1441	0	0	Yes	2.44898e-71	8.93753e-69	0.884371	-59.8557	TAAGCAAAGTGGAAAATATGGAAAAAGGAGTATGC	35	NCTC8325intergenic_2574892-2575196~~~TCH1516intergenic_2626400-2626705
4	n202381	4	1	589	3	1441	0	0	No	NA	NA	NA	NA	GGTTGATAACAACATTATACACGAAAGGAGATATAACAAATGA	43	TCH1516intergenic_1601133-1601200~~~NCTC8325intergenic_2069439-2070260~~~NCTC8325intergenic_1502932-1502986
4	n203346	1	0	589	1	1441	0	0	No	NA	NA	NA	NA	ACTGTATTGATTATTTACTTCATTTACTAAATATTGAGTGAGCAATCTCTTATGCA	56	USA300HOU_RS10805;DBGWAS_general_tag=hypothetical_protein~~~TCH1516intergenic_1601419-1601675~~~TCH1516intergenic_2121936-2122124
4	n204072	59	30	589	29	1441	0	0	No	NA	NA	NA	NA	AATAGACCTCTTACATCTCCAAAATAAAAATACATTGTCTTTAACTGTTGATGGTAAAAAAATTATTTAGGATTTTTTGTATTCATATCAAC	92
4	n204400	1	0	589	1	1441	0	0	No	NA	NA	NA	NA	GAATCGATTAGTAAATGAAGTAAATAATCATCTTTAATTTTTCTTCGTTCATTTG	55	TCH1516intergenic_1601419-1601675~~~TCH1516intergenic_2121936-2122124
4	n206893	2016	579	589	1437	1441	0	0	No	NA	NA	NA	NA	GTGGAAAATATGGAAAAAGGAGTATGCAAATGAGAGATAAGAAAGGACC	49	NCTC8325intergenic_2574892-2575196~~~TCH1516intergenic_2626400-2626705
4	n207345	1	1	589	0	1441	0	0	No	NA	NA	NA	NA	AATGGAATATAACACTTATCTTTATAAAATCATTTTATATATTGACGCACTTAAAACAATC	61	NCTC8325intergenic_2574892-2575196~~~TCH1516intergenic_2626400-2626705
4	n209275	1586	171	589	1415	1441	0	0	No	0.781618	0.999878	-0.00498026	0.277306	TTAGTAAATGAAGTAAATAATCAATACAGTTACCAA	36	TCH1516intergenic_1601419-1601675~~~TCH1516intergenic_2121936-2122124
4	n209310	2015	577	589	1438	1441	0	0	No	NA	NA	NA	NA	ATGCAAATGAGAGATAAGAAAGGACCGGTAAATAAAAG	38	USA300HOU_RS15580;DBGWAS_general_tag=YSIRK_signal_domain/LPXTG_anchor_domain_surface_protein~~~SAOUHSC_02798;DBGWAS_general_tag=hypothetical_protein
4	n209724	2029	588	589	1441	1441	0	0	No	NA	NA	NA	NA	ATATTCTAAATAAGTCTCATAAAGCTATTGCCTAAAATGATTATAGGTTATATGCTGA	58	NCTC8325intergenic_1547147-1547620~~~TCH1516intergenic_1644534-1645007
4	n209725	1	1	589	0	1441	0	0	No	NA	NA	NA	NA	ATATTCTAAATAAGTCTCATAAAGCTATTGTCTAAAATGATTATAGGTTATATGCTGATAT	61	NCTC8325intergenic_1547147-1547620~~~TCH1516intergenic_1644534-1645007
4	n211069	2028	587	589	1441	1441	0	0	No	NA	NA	NA	NA	AGAAAGCTAATATCAATAATGCTGCCGGTGCAGATAATTGAAAATCTAATCCTG	54	USA300HOU_RS13110;DBGWAS_general_tag=hypothetical_protein~~~SAOUHSC_02711;DBGWAS_general_tag=hypothetical_protein
4	n212025	1	1	589	0	1441	0	0	No	NA	NA	NA	NA	CCTTTTTTGCGAATTTTTGTACTATAGAATGGCAGTGTGTCAATAGAAAAATGA	54	TCH1516intergenic_2255322-2255636~~~NCTC8325intergenic_2201850-2202164
4	n213862	2014	577	589	1437	1441	0	0	No	NA	NA	NA	NA	TACCGGTCCTTTCTTATCTCTCATTTGCATACT	33
4	n214009	1	0	589	1	1441	0	0	No	NA	NA	NA	NA	ATAAAATAAACTCGATTAGCTCTTCCTTATTAAGACCTATTATATTCAATTATGTTTATA	60	USA300HOU_RS13935;DBGWAS_general_tag=N-acetyltransferase~~~SAOUHSC_02886;DBGWAS_general_tag=hypothetical_protein
4	n214760	2028	587	589	1441	1441	0	0	No	NA	NA	NA	NA	ATATCAGCATATAACCTATAATCATTTTAGGCA	33	NCTC8325intergenic_1547147-1547620~~~TCH1516intergenic_1644534-1645007
4	n215440	2029	588	589	1441	1441	0	0	No	NA	NA	NA	NA	ATTCCAAAGAAAGCTAATATCAATAATGCTGCCGGTG	37	USA300HOU_RS13110;DBGWAS_general_tag=hypothetical_protein~~~SAOUHSC_02711;DBGWAS_general_tag=hypothetical_protein
4	n216326	2029	588	589	1441	1441	0	0	No	NA	NA	NA	NA	AAAAATTATTTTAAAAATAAAAAGCCTCATATCAGCATATAACCTATAATCATTTTAG	58	NCTC8325intergenic_1547147-1547620~~~TCH1516intergenic_1644534-1645007
4	n216794	2015	578	589	1437	1441	0	0	No	NA	NA	NA	NA	CGGTCCTTTCTTATCTCTCATTTGCATACTC	31
4	n218371	1	1	589	0	1441	0	0	No	NA	NA	NA	NA	TATCAAAATCTATAGGAATAATATAATAATGGCAGTGTGTCAATAGAAAAATGAGA	56	TCH1516intergenic_680894-681137~~~TCH1516intergenic_1181433-1181907~~~NCTC8325intergenic_1087531-1088005
4	n219969	1652	213	589	1439	1441	0	0	No	0.30188	0.999878	0.0149245	-1.03249	AAATTCTCATTTTTCTATTGACACACTGCCA	31	TCH1516intergenic_680894-681137
4	n219970	2	2	589	0	1441	0	0	No	NA	NA	NA	NA	AAATTCTCATTTTTCTATTGACACACTGCCC	31	TCH1516intergenic_680894-681137
4	n219971	116	80	589	36	1441	0	0	No	NA	NA	NA	NA	AAATTCTCATTTTTCTATTGACACACTGCCT	31	TCH1516intergenic_680894-681137
4	n219972	8	8	589	0	1441	0	0	No	NA	NA	NA	NA	AAATTCTCATTTTTCTATTGACACACTGCCG	31	TCH1516intergenic_680894-681137
4	n220368	1	1	589	0	1441	0	0	No	NA	NA	NA	NA	TTTTCTTTTGCTCATTCGTTAAAGAACGACTTGTCGGGTTATTAAACCTAGGTTCTATATA	61	USA300HOU_RS00565;DBGWAS_general_tag=aspartate_aminotransferase~~~SAOUHSC_00064;DBGWAS_general_tag=hypothetical_protein
4	n222591	72	61	589	11	1441	0	0	No	NA	NA	NA	NA	AATTCTCATTTTTCTATTGACACACTGCCAA	31	TCH1516intergenic_680894-681137
4	n222592	9	3	589	6	1441	0	0	No	NA	NA	NA	NA	AATTCTCATTTTTCTATTGACACACTGCCAC	31	TCH1516intergenic_680894-681137
4	n222593	1594	155	589	1439	1441	0	0	No	0.411917	0.999878	0.0111076	-0.823057	AATTCTCATTTTTCTATTGACACACTGCCAT	31	TCH1516intergenic_680894-681137
4	n223032	4	4	589	0	1441	0	0	No	NA	NA	NA	NA	GTTGCTTCTTGAATGTTCATTTGTTGTTCCACCTTTCGTGTAT	43
4	n223122	1733	292	589	1441	1441	0	0	No	0.772036	0.999878	0.0122864	-0.289557	TTAAGAAATTCTCATTTTTCTATTGACACACTGC	34	TCH1516intergenic_680894-681137
4	n223765	1488	149	589	1339	1441	0	0	Yes	0.000511843	0.0275403	0.0712203	-3.48161	ATACACGAAAGGTGGAACAACAAATGAACAAAAAATCAGAAG	42
4	n223766	1	0	589	1	1441	0	0	No	NA	NA	NA	NA	TATACACGAAAGGTGGAACAACAAATGAACGAAGAA	36
4	n223914	1	1	589	0	1441	0	0	No	NA	NA	NA	NA	CACTACTTTAGGTTGATAACAACATTATACGCGAAAGGAAAGATAGAAATGCCACATATTT	61
4	n225544	2025	584	589	1441	1441	0	0	No	NA	NA	NA	NA	TTTGAATAGTATCAAAATCTATAGGAATAATATAATAAT	39	TCH1516intergenic_1181433-1181907~~~NCTC8325intergenic_1087531-1088005
4	n225586	2024	583	589	1441	1441	0	0	No	NA	NA	NA	NA	TATCAAAATCTATAGGAATAATATAATAATAAAA	34	TCH1516intergenic_1181433-1181907~~~NCTC8325intergenic_1087531-1088005
4	n225864	1489	152	589	1337	1441	0	0	Yes	0.000303701	0.0171301	0.0696907	-3.62001	GATAACAACATTATACACGAAAGGTGGAACAACAAATGAAC	41	TCH1516intergenic_1601133-1601200
4	n226349	6	2	589	4	1441	0	0	No	NA	NA	NA	NA	TGTATAATGTTGTTATCAACCTAAGGGGGGTGATGCTTATGGCTAAAAGAGGCAAGAA	58
4	n226494	17	17	589	0	1441	0	0	No	NA	NA	NA	NA	CAACATTATACACGAAAGGAGCATAAACATATGAACACAAGATCAGAAGG	50	NCTC8325intergenic_2069439-2070260~~~NCTC8325intergenic_1502932-1502986
4	n226904	1	1	589	0	1441	0	0	No	NA	NA	NA	NA	CTTGGTATTCTGATGTCTAACCCTTCTGATCTTGTGTTCATATGTTTATGC	51
4	n227273	1490	152	589	1338	1441	0	0	Yes	0.000182701	0.0106258	0.0736025	-3.75113	TATACACGAAAGGTGGAACAACAAATGAACA	31
4	n227501	1730	289	589	1441	1441	0	0	No	0.537094	0.999878	0.0185415	-0.61694	GAAATTCTCATTTTTCTATTGACACACTGCC	31	TCH1516intergenic_680894-681137
4	n227597	1	1	589	0	1441	0	0	No	NA	NA	NA	NA	TATTAAAATTTTAGAAAATGTAAAAAAATAATTGGTATTGAAATTAAAAAAGCACCTAGCA	61
4	n227717	1	1	589	0	1441	0	0	No	NA	NA	NA	NA	TGGAACAACAAATGAACAAAAAATCAGAAGAGTTAGACATCAGAATACCAAGGGTTTTCAG	61
4	n227720	80	75	589	5	1441	0	0	No	NA	NA	NA	NA	TCAAGAAGCAACTAAGATAGCTACAAAAAATCTTGTCTCTATGACACGGAAAGATTGGAA	60	SAOUHSC_01573;DBGWAS_general_tag=hypothetical_protein
4	n229185	2028	588	589	1440	1441	0	0	No	NA	NA	NA	NA	TATAAACATAATTGAATATAATAGGTCTTATAAGGAAGAGCTAATCGA	48	USA300HOU_RS13935;DBGWAS_general_tag=N-acetyltransferase~~~SAOUHSC_02886;DBGWAS_general_tag=hypothetical_protein
4	n230897	2028	588	589	1440	1441	0	0	No	NA	NA	NA	NA	TAAAGGGAAAATATTAACATCTAATTACTTAGGGTTTAATAGTCCTAAAATGTATGGAGAA	61	USA300HOU_RS13490;DBGWAS_general_tag=helicase~~~SAOUHSC_02790;DBGWAS_general_tag=hypothetical_protein
4	n230930	2	2	589	0	1441	0	0	No	NA	NA	NA	NA	AAGATCTTAAAAGGAGGAACAACAAATGAAACTACTAAGAAGGCTATTCAA	51
4	n232166	2029	589	589	1440	1441	0	0	No	NA	NA	NA	NA	TAATAGGTCTTATAAGGAAGAGCTAATCGAGTTTATTTTAT	41	USA300HOU_RS13935;DBGWAS_general_tag=N-acetyltransferase~~~SAOUHSC_02886;DBGWAS_general_tag=hypothetical_protein
4	n237886	1	1	589	0	1441	0	0	No	NA	NA	NA	NA	TCTTCTGAAAACCCTTGGTATGCTGATGTCCAACCCTTCCGATTTTTTGTTCATTGTGTGCCCTCCTTTAAAGTTATAAAAAGTTATATGAAGGCCAAAAAAATTTAGACCTTTATCTGGTCTAC	125
4	n237996	1	1	589	0	1441	0	0	No	NA	NA	NA	NA	AAAACAGTAAATACTTTTGATCAGTTAGTATAAATTATTCTTGTTAAATTGATTCATTA	59	SAOUHSC_00621;DBGWAS_general_tag=hypothetical_protein~~~USA300HOU_RS03280;DBGWAS_general_tag=hypothetical_protein
4	n238467	2024	583	589	1441	1441	0	0	No	NA	NA	NA	NA	AAAATTTTGAATAGTATCAAAATCTATAGGAATAA	35	TCH1516intergenic_1181433-1181907~~~NCTC8325intergenic_1087531-1088005
4	n239356	12	7	589	5	1441	0	0	No	NA	NA	NA	NA	ATTATACACGAAATAAGCATAAACATTATGCAAGCATTACAAACA	45
4	n239397	2028	587	589	1441	1441	0	0	No	NA	NA	NA	NA	AGTAAATACTTTTGATCAGTTAGTAATAAATTATTCTTGTTAAATTGATTCATTA	55	SAOUHSC_00621;DBGWAS_general_tag=hypothetical_protein~~~USA300HOU_RS03280;DBGWAS_general_tag=hypothetical_protein
4	n239793	20	8	589	12	1441	0	0	No	NA	NA	NA	NA	TTCTAAATTATCGATTTCAACAAATTTATCGTTAGAAAGATATAAACAAGCTTTCATACTT	61
4	n240477	1	1	589	0	1441	0	0	No	NA	NA	NA	NA	GTTAACTAAAGTTTACACCACCAATAAAAAAACAGGAAAACAAATTTCAAG	51
4	n240478	1	0	589	1	1441	0	0	No	NA	NA	NA	NA	GTTAACTAAAGTTTACACCACCAATAAAAAGAGAAATAAAAGTAAATCCAC	51	USA300HOU_RS00235;DBGWAS_general_tag=HNH_endonuclease
4	n240479	1	1	589	0	1441	0	0	No	NA	NA	NA	NA	TAACTGTTAACTAAAGTTTACACCACCAATCGATAAAATAAACTCGATTAGCTCTTC	57	USA300HOU_RS13935;DBGWAS_general_tag=N-acetyltransferase~~~SAOUHSC_02886;DBGWAS_general_tag=hypothetical_protein
4	n240485	2029	589	589	1440	1441	0	0	No	NA	NA	NA	NA	TTTCTCTTTCCACTGCAACATTTGATAACCAATGCGTGGATGTGTTTTAATAATATCTTTTGCGTCCTCATGACATTGTGAAAGTTTTTGTCTTAATGATGTCATATGCACTCTTAAACTAGGCATTTCAGT	132	USA300HOU_RS11230;DBGWAS_general_tag=DNA-binding_response_regulator~~~SAOUHSC_02315;DBGWAS_general_tag=DNA-binding_response_regulator
4	n241037	9	0	589	9	1441	0	0	No	NA	NA	NA	NA	TTAACTGTTAACTAAAGTTTACACCACCAAATAAATGTAGAGATTATAAATTAATGTT	58	TCH1516intergenic_1100436-1100765~~~NCTC8325intergenic_1006364-1006693
4	n241232	4	3	589	1	1441	0	0	No	NA	NA	NA	NA	TAACTGTTAACTAAAGTTTACACCACCAATAA	32
4	n241233	21	21	589	0	1441	0	0	No	NA	NA	NA	NA	AACTGTTAACTAAAGTTTACACCACCAATGGCAGTGTGTCAATAGAAAAATGAGA	55	TCH1516intergenic_680894-681137
4	n241234	2	0	589	2	1441	0	0	No	NA	NA	NA	NA	ATTAACTGTTAACTAAAGTTTACACCACCACATAAA	36
4	n242061	1495	61	589	1434	1441	0	0	No	0.00469627	0.193235	0.0453255	-2.87349	AATTAACTGTTAACTAAAGTTTACACCACCA	31
4	n242062	3	3	589	0	1441	0	0	No	NA	NA	NA	NA	AATTAACTGTTAACTAAAGTTTACACCACCCT	32
4	n242063	23	8	589	15	1441	0	0	No	NA	NA	NA	NA	AATTAACTGTTAACTAAAGTTTACACCACCT	31
4	n242672	1511	70	589	1441	1441	0	0	No	0.00796594	0.304992	0.0500131	-2.68734	ATTCCTTTCATAAGAATTAACTGTTAACTAAAGTTTACACCACC	44
4	n244254	2	1	589	1	1441	0	0	No	NA	NA	NA	NA	ACTGTTAACTAAAGTTTACACCACCAATAAAAA	33
4	n244277	3	0	589	3	1441	0	0	No	NA	NA	NA	NA	TAGATGCTACTAAAATGCTTTTTTTAACTGGTGGTGTAAACTTTAGTTAACAGTTAAT	58
4	n245195	1488	55	589	1433	1441	0	0	No	0.00185106	0.085912	0.0503401	-3.17803	ATTAACTGTTAACTAAAGTTTACACCACCAA	31
4	n245196	11	6	589	5	1441	0	0	No	NA	NA	NA	NA	ATTAACTGTTAACTAAAGTTTACACCACCAT	31
4	n245568	1487	55	589	1432	1441	0	0	No	0.00213597	0.0968892	0.0486674	-3.13183	ATTGGTGGTGTAAACTTTAGTTAACAGTTAA	31
4	n246153	22	21	589	1	1441	0	0	No	NA	NA	NA	NA	CATTGGTGGTGTAAACTTTAGTTAACAGTTA	31
4	n246593	5	3	589	2	1441	0	0	No	NA	NA	NA	NA	TATGGTGGTGTAAACTTTAGTTAACAGTTAA	31
4	n246907	2026	586	589	1440	1441	0	0	No	NA	NA	NA	NA	TATTCTAAAAAATTAAAAATTTCGCCTCATCTAATTTATGAA	42
4	n247206	2028	588	589	1440	1441	0	0	No	NA	NA	NA	NA	TTAAAAATTTCGCCTCATCTAATTTATGAATTGCTATGAT	40
4	n248189	113	0	589	113	1441	0	0	No	NA	NA	NA	NA	TAGGTAATGTAACAAATGGACATAAACAAATTAAAAGGAGGAACAACAAATGAACGAAGA	60	TCH1516intergenic_1601419-1601675
4	n248209	1266	138	589	1128	1441	0	0	No	0.451762	0.999878	-0.00662226	0.752224	AAACAACTTAAAAGGAGGAACAACAAATGAACGAAG	36	TCH1516intergenic_1601419-1601675
4	n248268	1	1	589	0	1441	0	0	No	NA	NA	NA	NA	CAAACATCTTAAAAGGAGGAACAACAAATGAACATTCAAGAAGCAAC	47
4	n248269	9	1	589	8	1441	0	0	No	NA	NA	NA	NA	CAAACATCTTAAAAGGAGGAACAACAAATGGA	32
4	n249524	18	18	589	0	1441	0	0	No	NA	NA	NA	NA	TAGGTAATGTAACAAATGGACATAAACAAAGATCTTAAAAGGAGGAACAACAAATGAA	58	TCH1516intergenic_1601419-1601675
4	n249571	2027	586	589	1441	1441	0	0	No	NA	NA	NA	NA	AAAGCAATTGGAGTATTGTTACTCATTGTCG	31	SAOUHSC_00621;DBGWAS_general_tag=hypothetical_protein
4	n250150	7	7	589	0	1441	0	0	No	NA	NA	NA	NA	GCGCCAGTAGAATCTTTAACAGAAAATGAAGGTCGACTAAGAAAGGAAATATTAGAAAGTA	61
4	n250412	3	3	589	0	1441	0	0	No	NA	NA	NA	NA	TTAACTAGAGTTTACACCACCAATTAAAAACACTTGTG	38
4	n250414	2	2	589	0	1441	0	0	No	NA	NA	NA	NA	TGTTAACTAGAGTTTACACCACCAATTAATAAAGATACTGGGATAAGTTACGG	53	USA300HOU_RS06595;DBGWAS_general_tag=hypothetical_protein~~~SAOUHSC_01288;DBGWAS_general_tag=hypothetical_protein
4	n250638	1	0	589	1	1441	0	0	No	NA	NA	NA	NA	CATCGTGATTGTCCCAACGAGTTGCTAGGTACTTTTTTAATTTCAATACCAAATATTTTTT	61	TCH1516intergenic_368566-368843~~~NCTC8325intergenic_310582-310859
4	n250639	2027	587	589	1440	1441	0	0	No	NA	NA	NA	NA	CCCAACGAGTTGCTAGGTGCTTTTTTAATTTCAATACCAA	40	TCH1516intergenic_368566-368843~~~NCTC8325intergenic_310582-310859
4	n251320	8	6	589	2	1441	0	0	No	NA	NA	NA	NA	TTCGAATAAAGGAGGAAACTGAAATGCAAGAATTAAAAAAGATTCATGAAATAGCAGTAAAA	62
4	n251567	80	75	589	5	1441	0	0	No	NA	NA	NA	NA	ATCTGATGAATTTGATACACTTACTAAAGACCAACAATATATCTTGTC	48	SAOUHSC_01572;DBGWAS_general_tag=hypothetical_protein
4	n251899	16	16	589	0	1441	0	0	No	NA	NA	NA	NA	AAGATCTTAAAAGGAGGAACAACAAATGAAC	31
4	n253110	50	24	589	26	1441	0	0	No	NA	NA	NA	NA	AGGAGGAAAACAAATGCAAGACTTAAAAAAGATTCATGAAATAGCAGTAAAA	52
4	n254030	9	9	589	0	1441	0	0	No	NA	NA	NA	NA	AGATCTTAAAAGGAGGAACAACAAATGAACAAAAAATCAGAAGG	44
4	n254031	7	7	589	0	1441	0	0	No	NA	NA	NA	NA	AGATCTTAAAAGGAGGAACAACAAATGAACGAAG	34	TCH1516intergenic_1601419-1601675
4	n254720	1	1	589	0	1441	0	0	No	NA	NA	NA	NA	TTTGTTGTTCCTCCTTTTAAGATGTTTGTTCTTGTTTTGTTGACATTTTGGAAACTCTGTAAGTAAAAAAAATACCGCACTTATCTTGT	89
4	n254747	0	0	589	0	1441	0	0	No	NA	NA	NA	NA	GTTAACTAAAGTTTACACCACCAATTAAAAGCACTTGTGTATTTATTACTTAACATTGACT	61	NCTC8325intergenic_1547147-1547620~~~TCH1516intergenic_1644534-1645007
4	n255090	2027	587	589	1440	1441	0	0	No	NA	NA	NA	NA	TCATCATAGCAATTCATAAATTAGATGAGGCG	32
4	n255355	1272	145	589	1127	1441	0	0	No	0.452727	0.999878	-0.00655068	0.750596	CTTAAAAGGAGGAACAACAAATGAACGAAGA	31	TCH1516intergenic_1601419-1601675
4	n255765	6	6	589	0	1441	0	0	No	NA	NA	NA	NA	TTTTTAATTGGTGGTGTAAACTCTAGTTAACA	32
4	n256754	4	4	589	0	1441	0	0	No	NA	NA	NA	NA	GTGCGTCAATATATAAAATAATTTTATAAATATAAGTGTTATATTCCATTGTGCAACTCCT	61	NCTC8325intergenic_2574892-2575196~~~TCH1516intergenic_2626400-2626705
4	n257854	1	0	589	1	1441	0	0	No	NA	NA	NA	NA	CATGTAATTTTACAAATACAATAGGAGTTGAACAATGGAATATAACACTTATCTTTATAAA	61	NCTC8325intergenic_2574892-2575196~~~TCH1516intergenic_2626400-2626705
4	n257855	2	1	589	1	1441	0	0	No	NA	NA	NA	NA	AATTTTACAAATACAATAGGAGTTGCACAACGGAATATAACACTTATCTTTATAAAATTAT	61	NCTC8325intergenic_2574892-2575196~~~TCH1516intergenic_2626400-2626705
4	n257856	1	1	589	0	1441	0	0	No	NA	NA	NA	NA	CAAATACAATAGGAGTTGCACAATGGAATACAACACTTATCTTTATAAAATTATTTTATAT	61	NCTC8325intergenic_2574892-2575196~~~TCH1516intergenic_2626400-2626705
4	n257857	2014	576	589	1438	1441	0	0	No	NA	NA	NA	NA	AAATACAATAGGAGTTGCACAATGGAATATAA	32	NCTC8325intergenic_2574892-2575196~~~TCH1516intergenic_2626400-2626705
4	n258857	1	1	589	0	1441	0	0	No	NA	NA	NA	NA	TTAACTAAAGTTTACACCACCAATTAAAAAATGTAGAGGTAAGATTAACTG	51	USA300HOU_RS13490;DBGWAS_general_tag=helicase~~~SAOUHSC_02790;DBGWAS_general_tag=hypothetical_protein
4	n258858	10	0	589	10	1441	0	0	No	NA	NA	NA	NA	TTAACTAAAGTTTACACCACCAATTAAAAACACTTGTG	38
4	n258859	1420	8	589	1412	1441	0	0	Yes	3.85371e-05	0.0024168	0.0637661	-4.25242	GTTAACTAAAGTTTACACCACCAATTAAAATCATGAATTGTAGCGCCAAATA	52	USA300HOU_RS03360;DBGWAS_general_tag=hypothetical_protein~~~SAOUHSC_00621;DBGWAS_general_tag=hypothetical_protein
4	n258860	14	14	589	0	1441	0	0	No	NA	NA	NA	NA	TGTTAACTAAAGTTTACACCACCAATTAATAAATCTATCAATGATGGTATCAA	53	USA300HOU_RS00565;DBGWAS_general_tag=aspartate_aminotransferase~~~SAOUHSC_00064;DBGWAS_general_tag=hypothetical_protein
4	n258861	8	0	589	8	1441	0	0	No	NA	NA	NA	NA	ACTGTTAACTAAAGTTTACACCACCAATTAGAATCATGAATTGTAGCGCCAAATAATCCAA	61	USA300HOU_RS03360;DBGWAS_general_tag=hypothetical_protein~~~SAOUHSC_00621;DBGWAS_general_tag=hypothetical_protein
4	n259465	1	1	589	0	1441	0	0	No	NA	NA	NA	NA	ATATTCCATTGTGCAACTCCTATTGTATTTATAAAATTACATGTAAATTCACTGTAAGTAA	61	NCTC8325intergenic_2574892-2575196~~~TCH1516intergenic_2626400-2626705
4	n259466	1	0	589	1	1441	0	0	No	NA	NA	NA	NA	GCAACTCCTATTGTATTTGTAAAATTACATATAAATTCACTGTAAGCAAAGTGGAAAATAT	61	NCTC8325intergenic_2574892-2575196~~~TCH1516intergenic_2626400-2626705
4	n259467	2016	577	589	1439	1441	0	0	No	NA	NA	NA	NA	CAACTCCTATTGTATTTGTAAAATTACATGTAAAT	35	NCTC8325intergenic_2574892-2575196~~~TCH1516intergenic_2626400-2626705
4	n259619	1462	30	589	1432	1441	0	0	Yes	3.1566e-08	2.76528e-06	0.0983146	-5.82377	TAACTGTTAACTAAAGTTTACACCACCAATTA	32
4	n259858	1	0	589	1	1441	0	0	No	NA	NA	NA	NA	GATACTGGGATAAGTTACGGTAATATTAATACTATGCGCCGTAGAGAAAGAAGAATAGAAA	61	USA300HOU_RS06595;DBGWAS_general_tag=hypothetical_protein~~~SAOUHSC_01288;DBGWAS_general_tag=hypothetical_protein
4	n260049	1	1	589	0	1441	0	0	No	NA	NA	NA	NA	ACAATAGGAGTTGCACAATGGAATATAACAATTATCTTTATAAAATTATTTTATATATTGA	61	NCTC8325intergenic_2574892-2575196~~~TCH1516intergenic_2626400-2626705
4	n260050	2010	572	589	1438	1441	0	0	No	NA	NA	NA	NA	ACAATAGGAGTTGCACAATGGAATATAACACTTAT	35	NCTC8325intergenic_2574892-2575196~~~TCH1516intergenic_2626400-2626705
4	n260051	3	3	589	0	1441	0	0	No	NA	NA	NA	NA	ATACAATAGGAGTTGCACAATGGAATATAATACTTATCTTTATAAAATTATTTTATATATT	61	NCTC8325intergenic_2574892-2575196~~~TCH1516intergenic_2626400-2626705
4	n260282	2028	589	589	1439	1441	0	0	No	NA	NA	NA	NA	AATTAATAAATCTATCAATGATGGTATCAATTTCATTAATTTGATT	46	USA300HOU_RS00565;DBGWAS_general_tag=aspartate_aminotransferase~~~SAOUHSC_00064;DBGWAS_general_tag=hypothetical_protein
4	n260466	2014	576	589	1438	1441	0	0	No	NA	NA	NA	NA	AATTTTACAAATACAATAGGAGTTGCACAATGGAATA	37	NCTC8325intergenic_2574892-2575196~~~TCH1516intergenic_2626400-2626705
4	n262242	1454	30	589	1424	1441	0	0	Yes	1.60191e-05	0.00104433	0.0667987	-4.44049	ACTGTTAACTAAAGTTTACACCACCAATTAA	31
4	n262523	2011	573	589	1438	1441	0	0	No	NA	NA	NA	NA	ATACAATAGGAGTTGCACAATGGAATATAACA	32	NCTC8325intergenic_2574892-2575196~~~TCH1516intergenic_2626400-2626705
4	n262656	2013	575	589	1438	1441	0	0	No	NA	NA	NA	NA	ATATTCCATTGTGCAACTCCTATTGTATTTG	31	NCTC8325intergenic_2574892-2575196~~~TCH1516intergenic_2626400-2626705
4	n263013	21	21	589	0	1441	0	0	No	NA	NA	NA	NA	ATTAATTGGTGGTGTAAACTTTAGTTAACAG	31
4	n263444	2016	577	589	1439	1441	0	0	No	NA	NA	NA	NA	ATGTAATTTTACAAATACAATAGGAGTTGCACAA	34	NCTC8325intergenic_2574892-2575196~~~TCH1516intergenic_2626400-2626705
4	n263882	2015	577	589	1438	1441	0	0	No	NA	NA	NA	NA	CATGTAATTTTACAAATACAATAGGAGTTGC	31	NCTC8325intergenic_2574892-2575196~~~TCH1516intergenic_2626400-2626705
4	n264131	1433	9	589	1424	1441	0	0	Yes	7.92411e-08	6.71108e-06	0.102433	-5.67882	CTGTTAACTAAAGTTTACACCACCAATTAAAA	32
4	n264386	11	1	589	10	1441	0	0	No	NA	NA	NA	NA	TTTTTAATTGGTGGTGTAAACTTTAGTTAAC	31
4	n264803	1	1	589	0	1441	0	0	No	NA	NA	NA	NA	TTCATTGAAAACTAAAAATAATAATTTTATAAAGATAAGTGTTATATTC	49	NCTC8325intergenic_2574892-2575196~~~TCH1516intergenic_2626400-2626705
4	n265262	2	0	589	2	1441	0	0	No	NA	NA	NA	NA	GTTTTAAGTGCGTCAATATATAAAATAATTCTATAAAGATAAGTGTTATATTCCATTGTGC	61	NCTC8325intergenic_2574892-2575196~~~TCH1516intergenic_2626400-2626705
4	n265264	1	1	589	0	1441	0	0	No	NA	NA	NA	NA	TTAAGTGCGTCAATATATAAAATAATTTTACAAAGATAAGTGTTATATTCCATTGTGCAAC	61	NCTC8325intergenic_2574892-2575196~~~TCH1516intergenic_2626400-2626705
4	n265265	2005	567	589	1438	1441	0	0	No	NA	NA	NA	NA	TATAAAATAATTTTATAAAGATAAGTGTTATATTC	35	NCTC8325intergenic_2574892-2575196~~~TCH1516intergenic_2626400-2626705
4	n266608	2028	587	589	1441	1441	0	0	No	NA	NA	NA	NA	AGAAAACAAAGAGATATCGAGTTATCAAATTAATAAAGATACTGGGATAAGTTACGG	57	USA300HOU_RS06595;DBGWAS_general_tag=hypothetical_protein~~~SAOUHSC_01288;DBGWAS_general_tag=hypothetical_protein
4	n267018	1	1	589	0	1441	0	0	No	NA	NA	NA	NA	AAAGATAAGTGTTATATTCCATTGTGCAACCCCTATTGTATTTGTAAAATTACATGTAAAT	61	NCTC8325intergenic_2574892-2575196~~~TCH1516intergenic_2626400-2626705
4	n267019	2006	568	589	1438	1441	0	0	No	NA	NA	NA	NA	AAAGATAAGTGTTATATTCCATTGTGCAACTCCT	34	NCTC8325intergenic_2574892-2575196~~~TCH1516intergenic_2626400-2626705
4	n267020	2030	589	589	1441	1441	0	0	No	NA	NA	NA	NA	AATTAATAAAGATACTGGGATAAGTTACGGTAATATTAAT	40	USA300HOU_RS06595;DBGWAS_general_tag=hypothetical_protein~~~SAOUHSC_01288;DBGWAS_general_tag=hypothetical_protein
4	n267078	1	1	589	0	1441	0	0	No	NA	NA	NA	NA	ATAAAGAGGGCATAAGCGATGGATTTGAATGGCAGTGTGTCAATAGAAAAATG	53
4	n267530	2005	567	589	1438	1441	0	0	No	NA	NA	NA	NA	AACACTTATCTTTATAAAATTATTTTATATAT	32	NCTC8325intergenic_2574892-2575196~~~TCH1516intergenic_2626400-2626705
4	n268216	2006	568	589	1438	1441	0	0	No	NA	NA	NA	NA	AATAATTTTATAAAGATAAGTGTTATATTCC	31	NCTC8325intergenic_2574892-2575196~~~TCH1516intergenic_2626400-2626705
4	n268890	2004	567	589	1437	1441	0	0	No	NA	NA	NA	NA	ATAATTTTATAAAGATAAGTGTTATATTCCATT	33	NCTC8325intergenic_2574892-2575196~~~TCH1516intergenic_2626400-2626705
4	n269645	2005	568	589	1437	1441	0	0	No	NA	NA	NA	NA	ACAATGGAATATAACACTTATCTTTATAAAAT	32	NCTC8325intergenic_2574892-2575196~~~TCH1516intergenic_2626400-2626705
4	n269748	2028	587	589	1441	1441	0	0	No	NA	NA	NA	NA	ACATAAAGAGGGCATAAGCGATGGATTTGAAT	32
4	n270123	1496	157	589	1339	1441	0	0	Yes	0.000372126	0.020698	0.0744022	-3.56993	ATGTCTAACCCTTCTGATTTTTTGTTCATTTGTTGTTCC	39	USA300HOU_RS07915;DBGWAS_general_tag=hypothetical_protein
4	n270786	2006	568	589	1438	1441	0	0	No	NA	NA	NA	NA	TATAAAGATAAGTGTTATATTCCATTGTGCAAC	33	NCTC8325intergenic_2574892-2575196~~~TCH1516intergenic_2626400-2626705
4	n270965	2027	587	589	1440	1441	0	0	No	NA	NA	NA	NA	CTATTGATATTCTAAAAAATTAAAAATTTCGCCTCAT	37
4	n272169	2004	568	589	1436	1441	0	0	No	NA	NA	NA	NA	GCACAATGGAATATAACACTTATCTTTATAAA	32	NCTC8325intergenic_2574892-2575196~~~TCH1516intergenic_2626400-2626705
4	n272496	1411	154	589	1257	1441	0	0	No	0.944689	0.999878	-0.000862895	0.0693432	CTTTTAGGTAATGTAACAAATGGACATAAACAA	33	TCH1516intergenic_1601419-1601675
4	n272776	131	18	589	113	1441	0	0	No	NA	NA	NA	NA	TTAGGTAATGTAACAAATGGACATAAACAAA	31	TCH1516intergenic_1601419-1601675
4	n273153	2028	588	589	1440	1441	0	0	No	NA	NA	NA	NA	AATTAAAAACACTTGTGTATTTATTACTTAACATTGACT	39	NCTC8325intergenic_1547147-1547620~~~TCH1516intergenic_1644534-1645007
4	n273154	1	1	589	0	1441	0	0	No	NA	NA	NA	NA	TTTTAAATTAAAAACACTTGTGTATTTATTTCTTAACATTGACTCATCTTAACTCTTGATT	61	NCTC8325intergenic_1547147-1547620~~~TCH1516intergenic_1644534-1645007
4	n273507	2016	586	589	1430	1441	0	0	No	NA	NA	NA	NA	TAAAACCACATTTTAAATTAAAAACACTTGTGTATTTATT	40	NCTC8325intergenic_1547147-1547620~~~TCH1516intergenic_1644534-1645007
4	n274160	52	18	589	34	1441	0	0	No	NA	NA	NA	NA	TTAGAAAGATATAAACAAGCTTTCATACTTATCACCTCCTTAGGTTGATA	50
4	n274597	13	3	589	10	1441	0	0	No	NA	NA	NA	NA	TAAGTAATAAATACACAAGTGTTTTTAATTGGTGGTGTAAACT	43	NCTC8325intergenic_1547147-1547620~~~TCH1516intergenic_1644534-1645007
4	n274828	2015	585	589	1430	1441	0	0	No	NA	NA	NA	NA	TTTTAAATTAAAAACACTTGTGTATTTATTACTTA	35	NCTC8325intergenic_1547147-1547620~~~TCH1516intergenic_1644534-1645007
4	n274954	34	12	589	22	1441	0	0	No	NA	NA	NA	NA	TCAACAAATTTATCATTAGAAAGATATAAACAAGCTTTCATACTT	45
4	n276143	2021	588	589	1433	1441	0	0	No	NA	NA	NA	NA	ACCCATAATAATTTGACCCGCAACTGTTGCAATTACAGTTAATGTTGCACCTAATTTTGGCAATAACAATAAATTGCCAGTTAAAAAGCTAACCCCAAG	99	USA300HOU_RS03360;DBGWAS_general_tag=hypothetical_protein~~~SAOUHSC_00621;DBGWAS_general_tag=hypothetical_protein
4	n276561	2030	589	589	1441	1441	0	0	No	NA	NA	NA	NA	AATCGATAAAATAAACTCGATTAGCTCTTCCTTAT	35	USA300HOU_RS13935;DBGWAS_general_tag=N-acetyltransferase~~~SAOUHSC_02886;DBGWAS_general_tag=hypothetical_protein
4	n276906	7	6	589	1	1441	0	0	No	NA	NA	NA	NA	ATCTAATTGTCGTTGAGTGAGATTTATATTATCCATACTTATCACCTCCTTAGGTTGATAA	61
4	n277195	2029	588	589	1441	1441	0	0	No	NA	NA	NA	NA	GAAGAGCTAATCGAGTTTATTTTATCGATTCAAAAAA	37	USA300HOU_RS13935;DBGWAS_general_tag=N-acetyltransferase~~~SAOUHSC_02886;DBGWAS_general_tag=hypothetical_protein
4	n280286	2027	588	589	1439	1441	0	0	No	NA	NA	NA	NA	TAATCGAGTTTATTTTATCGATTCAAAAAAA	31
4	n280453	3	1	589	2	1441	0	0	No	NA	NA	NA	NA	TAGTTATCTCCTAGTGAAAGGAGGTGATAATTATGAATAATATAAATCTCACTCA	55	TCH1516intergenic_2121647-2121705
4	n280693	18	18	589	0	1441	0	0	No	NA	NA	NA	NA	AAGTATTAAAAAAGGTTATTACAGCTACTTAGAAATAAACAAAGT	45	USA300HOU_RS07915;DBGWAS_general_tag=hypothetical_protein~~~SAOUHSC_01571;DBGWAS_general_tag=SLT_orf_71-like_protein
4	n282775	17	17	589	0	1441	0	0	No	NA	NA	NA	NA	TTCATTTTCTGTTAAAGATTCTACTGGCGCGTGATCTCTTCTGAAAACCCTTGGTAT	57
4	n283760	2013	583	589	1430	1441	0	0	No	NA	NA	NA	NA	TTATAATAAAACCACATTTTAAATTAAAAACACTTG	36	NCTC8325intergenic_1547147-1547620~~~TCH1516intergenic_1644534-1645007
4	n284901	1	1	589	0	1441	0	0	No	NA	NA	NA	NA	AGAAAGGAAATATTAGGAAGTATTAAAAAAAGTGATTACAGCTACTTAGA	50
4	n284902	1484	141	589	1343	1441	0	0	No	0.982675	0.999878	0.000588693	-0.0216848	AGAAAGGAAATATTAGGAAGTATTAAAAAAGGTGATTACAGCTACTTAGA	50	USA300HOU_RS07915;DBGWAS_general_tag=hypothetical_protein
4	n285744	1	0	589	1	1441	0	0	No	NA	NA	NA	NA	GAAAGATGCTGAAAGCAAAACTCTACACATGATTTATCCAAAAGATAGAGTTGTCAGTTTA	61	USA300HOU_RS10805;DBGWAS_general_tag=hypothetical_protein~~~USA300HOU_RS07920;DBGWAS_general_tag=hypothetical_protein
4	n286015	10	10	589	0	1441	0	0	No	NA	NA	NA	NA	GACGTTCATTTTCTGTTAAAGATTCTACTGGCGC	34	USA300HOU_RS07915;DBGWAS_general_tag=hypothetical_protein
4	n286278	2021	581	589	1440	1441	0	0	No	NA	NA	NA	NA	AAAAAATATTTGGTATTGAAATTAAAAAAGCACCTAG	37	TCH1516intergenic_368566-368843~~~NCTC8325intergenic_310582-310859
4	n287347	5	5	589	0	1441	0	0	No	NA	NA	NA	NA	GATATTAAAATTTTAGAAAATGTAAAAAAACATTTGGTATTGAAATTAAAAAAGCACCTAG	61	TCH1516intergenic_368566-368843~~~NCTC8325intergenic_310582-310859
4	n290377	233	218	589	15	1441	0	0	No	0.801331	0.999878	0.00487564	0.251416	TTAAAGGATCAATATACACCAATATCACCTCCTT	34
4	n290588	81	76	589	5	1441	0	0	No	NA	NA	NA	NA	AATGAACATTCAAGAAGCAACTAAGATAGCTACAAAAAA	39	SAOUHSC_01573;DBGWAS_general_tag=hypothetical_protein
4	n290593	284	269	589	15	1441	0	0	No	0.851889	0.999878	0.00439023	0.186561	AAACGAACATTTTTTAAAGGATCAATATACACCAATATCA	40	SAOUHSC_02226;DBGWAS_general_tag=hypothetical_protein
4	n291884	1	1	589	0	1441	0	0	No	NA	NA	NA	NA	TCAAGAAGCAACTAAGATAGCTACAAAAAAACTTGTCTCTATGACACGGAAAGATTGGAAA	61	SAOUHSC_01573;DBGWAS_general_tag=hypothetical_protein
4	n293045	7	7	589	0	1441	0	0	No	NA	NA	NA	NA	TTTTTCTATTGACACACTGCCATTTAAAAAGACACACCCTAATCACGTTAA	51	TCH1516intergenic_2504075-2504339~~~NCTC8325intergenic_2451024-2451288
4	n294394	285	269	589	16	1441	0	0	No	0.833247	0.999878	0.00489408	0.210385	AGGTGATATTGGTGTATATTGATCCTTTAAAAA	33
4	n295206	2029	588	589	1441	1441	0	0	No	NA	NA	NA	NA	AATTAAAAAATGTAGAGGTAAGATTAACTGATATT	35	USA300HOU_RS13490;DBGWAS_general_tag=helicase~~~SAOUHSC_02790;DBGWAS_general_tag=hypothetical_protein
4	n295699	2030	589	589	1441	1441	0	0	No	NA	NA	NA	NA	ATTTTAAAAATAAAGCGATTTATATAGAACCTAGGTTTAATAACCCGACA	50	USA300HOU_RS00565;DBGWAS_general_tag=aspartate_aminotransferase~~~SAOUHSC_00064;DBGWAS_general_tag=hypothetical_protein
4	n296290	6	6	589	0	1441	0	0	No	NA	NA	NA	NA	TCAAACAGTATTCGCCTAATTTTTTTAAATGGCAGTGTGTCAATAGAAA	49
4	n296950	80	75	589	5	1441	0	0	No	NA	NA	NA	NA	AACAAATGAACATTCAAGAAGCAACTAAGATAGC	34	SAOUHSC_01573;DBGWAS_general_tag=hypothetical_protein
4	n300177	1	1	589	0	1441	0	0	No	NA	NA	NA	NA	GACAAGATATATTGTTGGTCTTTAGTAAGTATATCAAATTCATCAGATATCAAGGGCATGT	61	SAOUHSC_01572;DBGWAS_general_tag=hypothetical_protein
4	n303105	1	0	589	1	1441	0	0	No	NA	NA	NA	NA	ATACTGCATTTGCAAACTGTTGCACTTTTAAGTATAACAGAATTAACTACATTTAAGGAGA	61	TCH1516intergenic_2504075-2504339~~~NCTC8325intergenic_2451024-2451288
4	n304034	5	5	589	0	1441	0	0	No	NA	NA	NA	NA	GGAACAACAAATGAACATTCAAGAAGCAACTAAGA	35
4	n304596	75	70	589	5	1441	0	0	No	NA	NA	NA	NA	GGAATAACAAATGAACATTCAAGAAGCAACTAAGA	35
4	n305403	6	3	589	3	1441	0	0	No	NA	NA	NA	NA	AATGGTGGTGTAAACTTTAGTTAACAGTTAA	31
4	n306587	1	1	589	0	1441	0	0	No	NA	NA	NA	NA	TCTCATTTTTCTATTGACACACTGCCATTGTAAATTTTTATTACATAGTATCCTAA	56	TCH1516intergenic_168320-168692~~~NCTC8325intergenic_113710-114082~~~TCH1516intergenic_680894-681137
4	n308662	6	6	589	0	1441	0	0	No	NA	NA	NA	NA	TTTTTCTTGCCTCTTTTAGCCATAAGCATCCCCCCCTTAGGTTGATAACAACATTATACA	60
4	n313638	1431	102	589	1329	1441	0	0	No	0.528352	0.999878	-0.00971102	0.630859	ATCTCTTATGCATACTTATCACCTCCTTTCACTAGGAGAT	40
4	n313639	1	1	589	0	1441	0	0	No	NA	NA	NA	NA	ATCTCTTATGCATACTTATCACCTCCTTTCGCTAGGAGATAACAACATTATACACGAAAGG	61	NCTC8325intergenic_2068365-2068423~~~TCH1516intergenic_2121647-2121705
4	n314302	2029	588	589	1441	1441	0	0	No	NA	NA	NA	NA	TATATAGAACCTAGGTTTAATAACCCGACAGGTCGTTCTTTAACGAATGAGCAAAAGAAAA	61	USA300HOU_RS00565;DBGWAS_general_tag=aspartate_aminotransferase~~~SAOUHSC_00064;DBGWAS_general_tag=hypothetical_protein
4	n316245	11	0	589	11	1441	0	0	No	NA	NA	NA	NA	TTGAAATAAAAGTTATTCAAAAATCATCTTGCCAATAAGGATTGAACCTGCATTTTCGATC	61
4	n319164	1448	8	589	1440	1441	0	0	Yes	6.79462e-114	5.60217e-111	0.96613	-102.839	TAAATTCACTGTAAGCAAAGTGGAAAATATGGAAAAAGGAG	41	TCH1516intergenic_2626400-2626705
4	n321535	1447	8	589	1439	1441	0	0	Yes	2.45493e-71	8.93753e-69	0.877168	-56.2435	TTGTAAAATTACATGTAAATTCACTGTAAGCAAAGTGGAAAATAT	45	NCTC8325intergenic_2574892-2575196~~~TCH1516intergenic_2626400-2626705
4	n322310	2028	587	589	1441	1441	0	0	No	NA	NA	NA	NA	GTCCTAAAATGTATGGAGAATTACTTAAATTAAAAAATGTAGAGGTAAGATTAACTG	57	USA300HOU_RS13490;DBGWAS_general_tag=helicase~~~SAOUHSC_02790;DBGWAS_general_tag=hypothetical_protein
4	n323740	2017	578	589	1439	1441	0	0	No	NA	NA	NA	NA	CTTACAGTGAATTTACATGTAATTTTACAAATACAATAGG	40	NCTC8325intergenic_2574892-2575196~~~TCH1516intergenic_2626400-2626705
4	n323978	78	78	589	0	1441	0	0	No	NA	NA	NA	NA	GTATAATGTTGTTATCAACCTAAAGTAGTGATAAGTATGAA	41
4	n323979	1714	372	589	1342	1441	0	0	No	0.0747751	0.999878	0.0244486	-1.78189	AATGTTGTTATCAACCTAAGGAGGTGATAAGTAT	34	TCH1516intergenic_1601133-1601200~~~NCTC8325intergenic_2069439-2070260~~~NCTC8325intergenic_1502932-1502986
4	n323980	63	17	589	46	1441	0	0	No	NA	NA	NA	NA	ATAATGTTGTTATCAACCTAAGGAGGTGATGCTTATGGCTAAAAGA	46	TCH1516intergenic_1601133-1601200~~~NCTC8325intergenic_2069439-2070260~~~NCTC8325intergenic_1502932-1502986
4	n323982	1	0	589	1	1441	0	0	No	NA	NA	NA	NA	TCCTTTCGTGTATAATGTTGTTATCTCCTAATGGAAGGAGGTGGTAT	47	NCTC8325intergenic_2068365-2068423~~~TCH1516intergenic_2121647-2121705
4	n323983	1642	293	589	1349	1441	0	0	No	0.680928	0.999878	-0.00613116	0.410985	AATGTTGTTATCTCCTAGTGAAAGGAGGTGA	31	NCTC8325intergenic_2068365-2068423~~~TCH1516intergenic_2121647-2121705
4	n323984	8	1	589	7	1441	0	0	No	NA	NA	NA	NA	AATGTTGTTATCTCCTAGTGAAAGGAGGTGGATAAT	36	NCTC8325intergenic_2068365-2068423~~~TCH1516intergenic_2121647-2121705
4	n324649	1647	293	589	1354	1441	0	0	No	0.600235	0.999878	-0.00739026	0.523817	CACCTCCTTTCACTAGGAGATAACAACATTATACA	35	NCTC8325intergenic_2068365-2068423~~~TCH1516intergenic_2121647-2121705
4	n324808	570	570	589	0	1441	0	0	Yes	2.80615e-44	6.90041e-42	-0.513536	-18.0848	TTACTTACAGTGAATTTACATGTAATTTTACAA	33	NCTC8325intergenic_2574892-2575196~~~TCH1516intergenic_2626400-2626705
4	n325095	1749	402	589	1347	1441	0	0	No	0.0609438	0.999878	0.0265554	-1.87425	ATAATGTTGTTATCAACCTAAGGAGGTGATA	31	TCH1516intergenic_1601133-1601200~~~NCTC8325intergenic_2069439-2070260~~~NCTC8325intergenic_1502932-1502986
4	n325305	1	1	589	0	1441	0	0	No	NA	NA	NA	NA	TATCACCTCCTTAGGTTGATAACAACATTAAA	32	TCH1516intergenic_1601133-1601200~~~NCTC8325intergenic_2069439-2070260~~~NCTC8325intergenic_1502932-1502986
4	n325306	1749	402	589	1347	1441	0	0	No	0.0609438	0.999878	0.0265554	-1.87425	ATCACCTCCTTAGGTTGATAACAACATTATAC	32	TCH1516intergenic_1601133-1601200~~~NCTC8325intergenic_2069439-2070260~~~NCTC8325intergenic_1502932-1502986
4	n325683	2021	582	589	1439	1441	0	0	No	NA	NA	NA	NA	ATTGTAAATTTTTATTACATAGTATCCTAAG	31	TCH1516intergenic_168320-168692~~~NCTC8325intergenic_113710-114082
4	n325970	2022	581	589	1441	1441	0	0	No	NA	NA	NA	NA	TTAGGATACTATGTAATAAAAATTTACAATAAAAAA	36	TCH1516intergenic_168320-168692~~~NCTC8325intergenic_113710-114082
4	n326387	1748	401	589	1347	1441	0	0	No	0.076072	0.999878	0.0250952	-1.77415	TAATGTTGTTATCAACCTAAGGAGGTGATAA	31	TCH1516intergenic_1601133-1601200~~~NCTC8325intergenic_2069439-2070260~~~NCTC8325intergenic_1502932-1502986
4	n327970	2025	588	589	1437	1441	0	0	No	NA	NA	NA	NA	GAATAAATTCTTTAATCGTACGTCCTTTTGACACACGTGCAAT	43	USA300HOU_RS11845;DBGWAS_general_tag=glycine/betaine_ABC_transporter_permease~~~SAOUHSC_02444;DBGWAS_general_tag=BCCT_family_osmoprotectant_transporter
4	n329619	63	58	589	5	1441	0	0	No	NA	NA	NA	NA	TCTTTAGTAAGTGTATCAAATTCATCAGATATCAAGGGCATGT	43	SAOUHSC_01572;DBGWAS_general_tag=hypothetical_protein
4	n330133	1	1	589	0	1441	0	0	No	NA	NA	NA	NA	TTCATACTTATCACTACTTTAGGTTGATAATAACATTATACACGAAAGGAAAGATAGAAA	60	NCTC8325intergenic_2068365-2068423~~~TCH1516intergenic_2121647-2121705
4	n330442	2	2	589	0	1441	0	0	No	NA	NA	NA	NA	TTATCTTTATAAAATTATTTTATATATTGATGCACTTAAAACAATCTACAAATAAAATTAT	61	NCTC8325intergenic_2574892-2575196~~~TCH1516intergenic_2626400-2626705
4	n330457	2027	589	589	1438	1441	0	0	No	NA	NA	NA	NA	AAAATATCTCTAAAGATATCATCTTCAATGATAGGAATA	39	USA300HOU_RS00565;DBGWAS_general_tag=aspartate_aminotransferase~~~SAOUHSC_00064;DBGWAS_general_tag=hypothetical_protein
4	n331038	2026	589	589	1437	1441	0	0	No	NA	NA	NA	NA	AGAATAAATTCTTTAATCGTACGTCCTTTTG	31	USA300HOU_RS11845;DBGWAS_general_tag=glycine/betaine_ABC_transporter_permease~~~SAOUHSC_02444;DBGWAS_general_tag=BCCT_family_osmoprotectant_transporter
4	n331837	1	0	589	1	1441	0	0	No	NA	NA	NA	NA	AAATTATTTTATATATTGACGCACTTAAAAAAATCTACAAATAAAATTATTATTTTTAGTT	61	NCTC8325intergenic_2574892-2575196~~~TCH1516intergenic_2626400-2626705
4	n332063	1419	32	589	1387	1441	0	0	No	0.0569673	0.999878	0.074905	-1.91557	CAATAAAAAGAGAAATAAAAGTAAATCCACAAAAA	35	USA300HOU_RS00235;DBGWAS_general_tag=HNH_endonuclease
4	n332853	1	1	589	0	1441	0	0	No	NA	NA	NA	NA	AAATTATTTTATATATTGACGCACTTAAAATAATCTACAAATAAAATTATTATTTTTAGTT	61	NCTC8325intergenic_2574892-2575196~~~TCH1516intergenic_2626400-2626705
4	n337440	2	2	589	0	1441	0	0	No	NA	NA	NA	NA	AGAAAACAAAGAGATATCGAGTTATCAAATGGCAGTGTGTCAATAGAAAAATGAGA	56	USA300HOU_RS06595;DBGWAS_general_tag=hypothetical_protein~~~SAOUHSC_01288;DBGWAS_general_tag=hypothetical_protein~~~TCH1516intergenic_680894-681137
4	n338390	2029	588	589	1441	1441	0	0	No	NA	NA	NA	NA	ATAAATTATTCTTGTTAAATTGATTCATTATGACGATG	38	SAOUHSC_00621;DBGWAS_general_tag=hypothetical_protein~~~USA300HOU_RS03280;DBGWAS_general_tag=hypothetical_protein
4	n340688	58	52	589	6	1441	0	0	No	NA	NA	NA	NA	CCATACTTATCACCTCCTTAGGTTGATAACTAAATTA	37	TCH1516intergenic_1601133-1601200
4	n340689	1442	103	589	1339	1441	0	0	No	0.456569	0.999878	-0.013283	0.744593	ACTTATCACCTCCTTTCACTAGGAGATAACAAC	33	NCTC8325intergenic_2068365-2068423~~~TCH1516intergenic_2121647-2121705
4	n340690	298	106	589	192	1441	0	0	No	0.816967	0.999878	0.00383783	0.23122	ACTTATCACCTCCTTTCACTAGGAGATAACTA	32	TCH1516intergenic_2121647-2121705
4	n340784	2	2	589	0	1441	0	0	No	NA	NA	NA	NA	TTTCTATTGACACACTGCCATTTAAAAAAAACGAAAACGATAAACACT	48
4	n340975	1559	200	589	1359	1441	0	0	No	0.698734	0.999878	-0.0049712	0.386925	ATACTTATCACCTCCTTTCACTAGGAGATAAC	32	TCH1516intergenic_2121647-2121705
4	n341142	1642	293	589	1349	1441	0	0	No	0.680928	0.999878	-0.00613116	0.410985	TATCACCTCCTTTCACTAGGAGATAACAACAT	32	NCTC8325intergenic_2068365-2068423~~~TCH1516intergenic_2121647-2121705
4	n341222	297	106	589	191	1441	0	0	No	0.824977	0.999878	0.0036305	0.22091	ATCTCCTAGTGAAAGGAGGTGATAAGTATGGA	32
4	n341355	297	106	589	191	1441	0	0	No	0.824977	0.999878	0.0036305	0.22091	AAATCATTAAATTCCATACTTATCACCTCCTTTCACTAGGAG	42
4	n341970	378	272	589	106	1441	0	0	No	0.617253	0.999878	-0.00617634	-0.499594	CATACTTATCACCTCCTTAGGTTGATAACAA	31	TCH1516intergenic_1601133-1601200~~~NCTC8325intergenic_2069439-2070260
4	n341971	1556	200	589	1356	1441	0	0	No	0.606958	0.999878	-0.00638644	0.514428	CATACTTATCACCTCCTTTCACTAGGAGATA	31	TCH1516intergenic_2121647-2121705
4	n342048	262	218	589	44	1441	0	0	No	0.534821	0.999878	-0.010236	-0.620505	CCATACTTATCACCTCCTTAGGTTGATAACA	31	TCH1516intergenic_1601133-1601200
4	n342108	1487	148	589	1339	1441	0	0	Yes	0.000217029	0.0124672	0.0786589	-3.70863	CCTTCTGATTTTTTGTTCATTTGTTGTTCCA	31
4	n342394	301	108	589	193	1441	0	0	No	0.815961	0.999878	0.00384291	0.232526	TATCACCTCCTTTCACTAGGAGATAACTAAA	31
4	n342432	117	60	589	57	1441	0	0	No	NA	NA	NA	NA	TTTCATACTTATCACCTCCTTAGGTTGATAACA	33	TCH1516intergenic_1601133-1601200
4	n342441	318	270	589	48	1441	0	0	No	0.611985	0.999878	-0.00896139	-0.507078	TCCATACTTATCACCTCCTTAGGTTGATAAC	31	TCH1516intergenic_1601133-1601200
4	n342484	300	107	589	193	1441	0	0	No	0.847408	0.999878	0.00318039	0.192204	TTATCACCTCCTTTCACTAGGAGATAACTAA	31	TCH1516intergenic_2121647-2121705
4	n343180	2	0	589	2	1441	0	0	No	NA	NA	NA	NA	TCGCTTTATTTTTAAAATTAATAAATCTATTAATGATGGTATCAATTTCATTAATTTGATT	61	USA300HOU_RS00565;DBGWAS_general_tag=aspartate_aminotransferase~~~SAOUHSC_00064;DBGWAS_general_tag=hypothetical_protein
4	n343409	1	0	589	1	1441	0	0	No	NA	NA	NA	NA	GTCGGTTCAGTCTGAAACAATAGATTTAATGGCAGTGTGTCAATAGAAAAATG	53	USA300HOU_RS07695;DBGWAS_general_tag=peptidase~~~SAOUHSC_01523;DBGWAS_general_tag=SLT_orf_527-like_protein
4	n348080	2028	588	589	1440	1441	0	0	No	NA	NA	NA	NA	TTCTTGTTAAATTGATTCATTATGACGATGC	31	SAOUHSC_00621;DBGWAS_general_tag=hypothetical_protein~~~USA300HOU_RS03280;DBGWAS_general_tag=hypothetical_protein
4	n349387	1417	32	589	1385	1441	0	0	No	0.280671	0.999878	0.0343525	-1.08515	TTGAAATTCATCATTTAAAACCAATGTTTTCAAT	34	USA300HOU_RS00235;DBGWAS_general_tag=HNH_endonuclease
4	n349537	2028	589	589	1439	1441	0	0	No	NA	NA	NA	NA	GGTTATCAAATGTTGCAGTGGAAAGAGAAATAATTAAAT	39	USA300HOU_RS11230;DBGWAS_general_tag=DNA-binding_response_regulator~~~SAOUHSC_02315;DBGWAS_general_tag=DNA-binding_response_regulator
4	n349620	2025	588	589	1437	1441	0	0	No	NA	NA	NA	NA	GCAGTGGAAAGAGAAATAATTAAATAAAAAAGATCGCTGCCATTAAA	47	TCH1516intergenic_2201270-2201638~~~NCTC8325intergenic_2147798-2148166
4	n349621	1	1	589	0	1441	0	0	No	NA	NA	NA	NA	ATGTTGCAGTGGAAAGAGAAATAATTAAATGGCAGTGTGTCAATAGAAAAA	51	TCH1516intergenic_680894-681137
4	n352262	2027	588	589	1439	1441	0	0	No	NA	NA	NA	NA	ATGTTGCAGTGGAAAGAGAAATAATTAAATAAAAA	35
4	n353063	1	1	589	0	1441	0	0	No	NA	NA	NA	NA	GATATTAAAATTTTAGAAAATGTAAAAAAAATATTTGGTATTGAAATTAAAAAA	54
4	n353087	2020	580	589	1440	1441	0	0	No	NA	NA	NA	NA	AAAAAAATATTTGGTATTGAAATTAAAAAAG	31
4	n353088	2	2	589	0	1441	0	0	No	NA	NA	NA	NA	AAAATGTAAAAAAATATTTGGTATTGAAATGGCAGTGTGTCAATAGAAAAATGAGA	56	TCH1516intergenic_680894-681137
4	n353625	2019	579	589	1440	1441	0	0	No	NA	NA	NA	NA	AAAATGTAAAAAAATATTTGGTATTGAAATTAAAAAA	37
4	n354194	2021	581	589	1440	1441	0	0	No	NA	NA	NA	NA	TATTAAAATTTTAGAAAATGTAAAAAAATATTTGGTATTGAAAT	44
4	n354549	2	2	589	0	1441	0	0	No	NA	NA	NA	NA	CCTTTCACTAGGAGATAACAACATTATACAAGAAAGGAAAGATAGAAATGCCACATATTTT	61	NCTC8325intergenic_2068365-2068423~~~TCH1516intergenic_2121647-2121705
4	n354550	8	1	589	7	1441	0	0	No	NA	NA	NA	NA	CTTTCACTAGGAGATAACAACATTATACACAACACAAAAATAAAAAGGAGG	51	NCTC8325intergenic_2068365-2068423~~~TCH1516intergenic_2121647-2121705
4	n354551	9	7	589	2	1441	0	0	No	NA	NA	NA	NA	CTTAGGTTGATAACAACATTATACACGAAATAAGCATAAACATTATG	47	TCH1516intergenic_1601133-1601200~~~NCTC8325intergenic_2069439-2070260~~~NCTC8325intergenic_1502932-1502986
4	n354553	3	3	589	0	1441	0	0	No	NA	NA	NA	NA	AACAACATTATACACGAAAGGAACATAAACA	31
4	n354741	2030	589	589	1441	1441	0	0	No	NA	NA	NA	NA	ACAACTCTTCAATTCAAGCATGTTCATATTGCTGGCGACATTAT	44	NCTC8325intergenic_1547147-1547620~~~TCH1516intergenic_1644534-1645007
4	n356041	1739	393	589	1346	1441	0	0	No	0.0168425	0.577902	0.0352699	-2.39121	ACCTCCTTAGGTTGATAACAACATTATACACGAA	34	TCH1516intergenic_1601133-1601200~~~NCTC8325intergenic_2069439-2070260~~~NCTC8325intergenic_1502932-1502986
4	n356056	1489	152	589	1337	1441	0	0	Yes	0.000303701	0.0171301	0.0696907	-3.62001	GTTCCACCTTTCGTGTATAATGTTGTTATCAACCTA	36	TCH1516intergenic_1601133-1601200~~~NCTC8325intergenic_2069439-2070260~~~NCTC8325intergenic_1502932-1502986
4	n356057	1	0	589	1	1441	0	0	No	NA	NA	NA	NA	GTTCCACCTTTCGTGTATAATGTTGTTATCTCCTAG	36	TCH1516intergenic_1601133-1601200~~~NCTC8325intergenic_2068365-2068423~~~TCH1516intergenic_2121647-2121705
4	n356111	77	77	589	0	1441	0	0	No	NA	NA	NA	NA	CACTACTTTAGGTTGATAACAACATTATACACGAAAG	37	TCH1516intergenic_1601133-1601200~~~NCTC8325intergenic_2069439-2070260~~~NCTC8325intergenic_1502932-1502986
4	n356137	1692	342	589	1350	1441	0	0	No	0.546993	0.999878	-0.00938558	0.602077	CTTTCACTAGGAGATAACAACATTATACACGAAAGG	36	NCTC8325intergenic_2068365-2068423~~~TCH1516intergenic_2121647-2121705
4	n356373	1	1	589	0	1441	0	0	No	NA	NA	NA	NA	GGTTGATAACAACATTATACACGAAAGGAACATAAAC	37	TCH1516intergenic_1601133-1601200~~~NCTC8325intergenic_2069439-2070260~~~NCTC8325intergenic_1502932-1502986
4	n356641	144	137	589	7	1441	0	0	No	NA	NA	NA	NA	ATCTTTCCTTTCGTGTATAATGTTGTTATCAACC	34	TCH1516intergenic_1601133-1601200~~~NCTC8325intergenic_2069439-2070260~~~NCTC8325intergenic_1502932-1502986~~~NCTC8325intergenic_2068365-2068423~~~TCH1516intergenic_2121647-2121705
4	n356642	1693	343	589	1350	1441	0	0	No	0.46497	0.999878	-0.0114459	0.730444	ATCTTTCCTTTCGTGTATAATGTTGTTATCTCCTA	35	NCTC8325intergenic_2068365-2068423~~~TCH1516intergenic_2121647-2121705
4	n357011	447	304	589	143	1441	0	0	No	0.511966	0.999878	-0.00792178	-0.655455	ATGCTCCTTTCGTGTATAATGTTGTTATCAA	31	NCTC8325intergenic_2069439-2070260~~~NCTC8325intergenic_1502932-1502986
4	n357012	1	0	589	1	1441	0	0	No	NA	NA	NA	NA	TATGCTCCTTTCGTGTATAATGTTGTTATCTC	32	NCTC8325intergenic_2069439-2070260~~~NCTC8325intergenic_1502932-1502986
4	n357216	4	3	589	1	1441	0	0	No	NA	NA	NA	NA	TAGGAGATAACAACATTATACACGAAAGGAGCA	33	NCTC8325intergenic_2069439-2070260~~~NCTC8325intergenic_1502932-1502986~~~NCTC8325intergenic_2068365-2068423~~~TCH1516intergenic_2121647-2121705
4	n357229	145	138	589	7	1441	0	0	No	NA	NA	NA	NA	AGGTTGATAACAACATTATACACGAAAGGAA	31	TCH1516intergenic_1601133-1601200~~~NCTC8325intergenic_2069439-2070260~~~NCTC8325intergenic_1502932-1502986
4	n357230	443	299	589	144	1441	0	0	No	0.520373	0.999878	-0.00768828	-0.642524	AGGTTGATAACAACATTATACACGAAAGGAG	31	TCH1516intergenic_1601133-1601200~~~NCTC8325intergenic_2069439-2070260~~~NCTC8325intergenic_1502932-1502986
4	n357316	1749	402	589	1347	1441	0	0	No	0.0609438	0.999878	0.0265554	-1.87425	CACCTCCTTAGGTTGATAACAACATTATACA	31	TCH1516intergenic_1601133-1601200~~~NCTC8325intergenic_2069439-2070260~~~NCTC8325intergenic_1502932-1502986
4	n357443	12	8	589	4	1441	0	0	No	NA	NA	NA	NA	CCCCCCTTAGGTTGATAACAACATTATACACGAA	34	TCH1516intergenic_1601133-1601200~~~NCTC8325intergenic_2069439-2070260~~~NCTC8325intergenic_1502932-1502986
4	n357470	6	6	589	0	1441	0	0	No	NA	NA	NA	NA	CCTCCTTTCGTGTATAATGTTGTTATCAACC	31	TCH1516intergenic_1601133-1601200~~~NCTC8325intergenic_2069439-2070260~~~NCTC8325intergenic_1502932-1502986
4	n357474	1747	400	589	1347	1441	0	0	No	0.0140255	0.493433	0.0354281	-2.45761	CCTTAGGTTGATAACAACATTATACACGAAA	31	TCH1516intergenic_1601133-1601200~~~NCTC8325intergenic_2069439-2070260~~~NCTC8325intergenic_1502932-1502986
4	n357480	1645	291	589	1354	1441	0	0	No	0.540824	0.999878	-0.00844225	0.611294	CCTTTCACTAGGAGATAACAACATTATACAC	31	NCTC8325intergenic_2068365-2068423~~~TCH1516intergenic_2121647-2121705
4	n357481	1805	458	589	1347	1441	0	0	No	0.0389501	0.999878	0.028076	-2.06505	CCTTTCGTGTATAATGTTGTTATCAACCTAA	31	TCH1516intergenic_1601133-1601200~~~NCTC8325intergenic_2069439-2070260~~~NCTC8325intergenic_1502932-1502986
4	n357553	1693	343	589	1350	1441	0	0	No	0.46497	0.999878	-0.0114459	0.730444	CTAGGAGATAACAACATTATACACGAAAGGA	31	NCTC8325intergenic_2068365-2068423~~~TCH1516intergenic_2121647-2121705
4	n357571	1747	400	589	1347	1441	0	0	No	0.0140255	0.493433	0.0354281	-2.45761	CTTAGGTTGATAACAACATTATACACGAAAG	31	TCH1516intergenic_1601133-1601200~~~NCTC8325intergenic_2069439-2070260~~~NCTC8325intergenic_1502932-1502986
4	n357725	1836	480	589	1356	1441	0	0	No	NA	NA	NA	NA	TATCTTTCCTTTCGTGTATAATGTTGTTATC	31	NCTC8325intergenic_2068365-2068423~~~TCH1516intergenic_2121647-2121705
4	n357754	512	367	589	145	1441	0	0	No	0.415778	0.999878	-0.00899881	-0.81348	TAGGTTGATAACAACATTATACACGAAAGGA	31	TCH1516intergenic_1601133-1601200~~~NCTC8325intergenic_2069439-2070260~~~NCTC8325intergenic_1502932-1502986
4	n357914	438	297	589	141	1441	0	0	No	0.46764	0.999878	-0.00900667	-0.72611	TGCTCCTTTCGTGTATAATGTTGTTATCAACC	32	TCH1516intergenic_1601133-1601200~~~NCTC8325intergenic_2069439-2070260~~~NCTC8325intergenic_1502932-1502986
4	n360252	1596	172	589	1424	1441	0	0	No	0.857887	0.999878	0.00321438	-0.178977	CATAAGAGATTGCTCACTCAATATTTAGATAAAGAAA	37	USA300HOU_RS10805;DBGWAS_general_tag=hypothetical_protein~~~USA300HOU_RS07920;DBGWAS_general_tag=hypothetical_protein
4	n360885	1588	164	589	1424	1441	0	0	No	0.697316	0.999878	0.00691987	-0.388783	AATGTAAATCTAAAGAAGTAACGATTTCTTTATCTAAATATTGAGTGAGCAATC	54	USA300HOU_RS10805;DBGWAS_general_tag=hypothetical_protein~~~USA300HOU_RS07920;DBGWAS_general_tag=hypothetical_protein
4	n361246	1430	110	589	1320	1441	0	0	No	0.179437	0.999878	-0.0179393	1.34281	ATCTAAATATTGAGTGAGCAATCTCTTATGCA	32	USA300HOU_RS10805;DBGWAS_general_tag=hypothetical_protein
4	n362057	2029	588	589	1441	1441	0	0	No	NA	NA	NA	NA	CTGGATTCCATGCCAAAGGATATATTTTTGA	31	USA300HOU_RS13490;DBGWAS_general_tag=helicase~~~SAOUHSC_02790;DBGWAS_general_tag=hypothetical_protein
4	n364217	2029	588	589	1441	1441	0	0	No	NA	NA	NA	NA	AATCAAGAGTTAAGATGAGTCAATGTTAAGTAATAAATACACAAGTG	47	NCTC8325intergenic_1547147-1547620~~~TCH1516intergenic_1644534-1645007
4	n367059	14	3	589	11	1441	0	0	No	NA	NA	NA	NA	CCAAAGTTATAATAAAACCACATTTTAAATGGCAGTGTGTCAATAGAAAAAT	52	NCTC8325intergenic_1547147-1547620~~~TCH1516intergenic_1644534-1645007~~~TCH1516intergenic_680894-681137
4	n367227	14	14	589	0	1441	0	0	No	NA	NA	NA	NA	GTTCTATATAAATCGCTTTATTTTTAAAATGGCAGTGTGTCAATAGAAAAATGAGA	56	USA300HOU_RS00565;DBGWAS_general_tag=aspartate_aminotransferase~~~SAOUHSC_00064;DBGWAS_general_tag=hypothetical_protein~~~TCH1516intergenic_680894-681137
4	n367529	2019	578	589	1441	1441	0	0	No	NA	NA	NA	NA	TAAATAAAAGAGTAGATTTTCTATCAAATAAA	32	USA300HOU_RS15580;DBGWAS_general_tag=YSIRK_signal_domain/LPXTG_anchor_domain_surface_protein~~~SAOUHSC_02798;DBGWAS_general_tag=hypothetical_protein
4	n367629	1	1	589	0	1441	0	0	No	NA	NA	NA	NA	CGTTTTAAATAGGTGGGTTGCTATTAGAATGGCAGTGTGTCAATAGAAAAATGA	54	TCH1516intergenic_2184956-2185389~~~NCTC8325intergenic_2131495-2131928
4	n367793	1592	172	589	1420	1441	0	0	No	0.574979	0.999878	-0.0102571	0.561297	CAAATGAACGAAGAAAAATTAAAGATGATTCT	32	TCH1516intergenic_1601419-1601675~~~TCH1516intergenic_2121936-2122124
4	n367842	1487	48	589	1439	1441	0	0	Yes	6.51636e-07	4.8974e-05	0.0858254	-5.15919	AAATGGCAGTGTGTCAATAGAAAAATGAGAA	31	TCH1516intergenic_680894-681137
4	n368033	1592	172	589	1420	1441	0	0	No	0.574979	0.999878	-0.0102571	0.561297	AACAAATGAACGAAGAAAAATTAAAGATGATT	32	TCH1516intergenic_1601419-1601675~~~TCH1516intergenic_2121936-2122124
4	n368036	1381	145	589	1236	1441	0	0	No	0.794996	0.999878	0.00272786	-0.259712	GGAACAACAAATGAACGAAGAAAAATTAAAGATGA	35	TCH1516intergenic_1601419-1601675~~~TCH1516intergenic_2121936-2122124
4	n368510	2028	588	589	1440	1441	0	0	No	NA	NA	NA	NA	ATTCTAATAGCAACCCACCTATTTAAAACGACAATTAG	38	TCH1516intergenic_2184956-2185389~~~NCTC8325intergenic_2131495-2131928
4	n368607	1437	9	589	1428	1441	0	0	Yes	1.12677e-10	1.18303e-08	0.138295	-6.98864	TAATTAAATGGCAGTGTGTCAATAGAAAAATGA	33	TCH1516intergenic_680894-681137
4	n368628	1	1	589	0	1441	0	0	No	NA	NA	NA	NA	GTCCTAAAATGTATGGAGAATTACTTAAATGGCAGTGTGTCAATAGAAAAATGA	54	USA300HOU_RS13490;DBGWAS_general_tag=helicase~~~SAOUHSC_02790;DBGWAS_general_tag=hypothetical_protein~~~TCH1516intergenic_680894-681137
4	n368859	1528	89	589	1439	1441	0	0	No	0.0735814	0.999878	0.0264842	-1.80341	AATGGCAGTGTGTCAATAGAAAAATGAGAAT	31	TCH1516intergenic_680894-681137
4	n369387	2017	576	589	1441	1441	0	0	No	NA	NA	NA	NA	GACCGGTAAATAAAAGAGTAGATTTTCTATCAAAT	35	USA300HOU_RS15580;DBGWAS_general_tag=YSIRK_signal_domain/LPXTG_anchor_domain_surface_protein~~~SAOUHSC_02798;DBGWAS_general_tag=hypothetical_protein
4	n369496	3	2	589	1	1441	0	0	No	NA	NA	NA	NA	ACTTCTTCCTTTTGAATGGCAGTGTGTCAATAGAAAAAT	39
4	n369802	3	3	589	0	1441	0	0	No	NA	NA	NA	NA	TATCAATGGCAGTGTGTCAATAGAAAAATGAG	32	TCH1516intergenic_680894-681137
4	n369958	4	3	589	1	1441	0	0	No	NA	NA	NA	NA	ATTTAATGGCAGTGTGTCAATAGAAAAATGA	31
4	n370010	17	17	589	0	1441	0	0	No	NA	NA	NA	NA	ATTTTTCTATTGACACACTGCCATTTAAAAA	31	TCH1516intergenic_680894-681137
4	n370179	2	2	589	0	1441	0	0	No	NA	NA	NA	NA	TAGAATGGCAGTGTGTCAATAGAAAAATGAGA	32	TCH1516intergenic_680894-681137
4	n370366	28	27	589	1	1441	0	0	No	NA	NA	NA	NA	CAATGGCAGTGTGTCAATAGAAAAATGAGAA	31	TCH1516intergenic_680894-681137
4	n370412	2	2	589	0	1441	0	0	No	NA	NA	NA	NA	CATTTTTCTATTGACACACTGCCATTAAATA	31
4	n370413	5	4	589	1	1441	0	0	No	NA	NA	NA	NA	CATTTTTCTATTGACACACTGCCATTCAAAA	31
4	n370414	31	20	589	11	1441	0	0	No	NA	NA	NA	NA	TCATTTTTCTATTGACACACTGCCATTTAAAA	32	TCH1516intergenic_680894-681137
4	n370533	6	5	589	1	1441	0	0	No	NA	NA	NA	NA	TCTCATTTTTCTATTGACACACTGCCATTAAA	32	TCH1516intergenic_680894-681137
4	n370534	6	5	589	1	1441	0	0	No	NA	NA	NA	NA	TCTCATTTTTCTATTGACACACTGCCATTCAAA	33	TCH1516intergenic_680894-681137
4	n370535	1469	30	589	1439	1441	0	0	Yes	1.46007e-09	1.42614e-07	0.126681	-6.41617	TCTCATTTTTCTATTGACACACTGCCATTTAA	32	TCH1516intergenic_680894-681137
4	n370679	7	6	589	1	1441	0	0	No	NA	NA	NA	NA	TAATGGCAGTGTGTCAATAGAAAAATGAGAA	31	TCH1516intergenic_680894-681137
4	n370719	2018	577	589	1441	1441	0	0	No	NA	NA	NA	NA	TATTTGATAGAAAATCTACTCTTTTATTTAC	31	USA300HOU_RS15580;DBGWAS_general_tag=YSIRK_signal_domain/LPXTG_anchor_domain_surface_protein~~~SAOUHSC_02798;DBGWAS_general_tag=hypothetical_protein
4	n370739	4	3	589	1	1441	0	0	No	NA	NA	NA	NA	TCAATGGCAGTGTGTCAATAGAAAAATGAGA	31	TCH1516intergenic_680894-681137
4	n370769	1437	8	589	1429	1441	0	0	Yes	5.73414e-13	7.17612e-11	0.16957	-7.92509	TTAATTAAATGGCAGTGTGTCAATAGAAAAA	31	TCH1516intergenic_680894-681137
4	n370790	9	8	589	1	1441	0	0	No	NA	NA	NA	NA	TTCTCATTTTTCTATTGACACACTGCCATTC	31	TCH1516intergenic_680894-681137
4	n370810	8	8	589	0	1441	0	0	No	NA	NA	NA	NA	TTTTCTATTGACACACTGCCATTTAAAAAAA	31
4	n370813	10	10	589	0	1441	0	0	No	NA	NA	NA	NA	TTTTTCTATTGACACACTGCCATTTAAAAAA	31
4	n371414	2029	588	589	1441	1441	0	0	No	NA	NA	NA	NA	TAAAAGTGCAACAGTTTGCAAATGCAGTATTTATAT	36	TCH1516intergenic_2504075-2504339~~~NCTC8325intergenic_2451024-2451288
4	n371928	1584	171	589	1413	1441	0	0	No	0.558489	0.999878	-0.00968829	0.585217	AAAGATGCTGAAAGCAAAACTCTACACATCATT	33	USA300HOU_RS10805;DBGWAS_general_tag=hypothetical_protein~~~USA300HOU_RS07920;DBGWAS_general_tag=hypothetical_protein
4	n372131	2026	585	589	1441	1441	0	0	No	NA	NA	NA	NA	TGCAACAGTTTGCAAATGCAGTATTTATATTACATAAAATTAATT	45	TCH1516intergenic_2504075-2504339~~~NCTC8325intergenic_2451024-2451288
4	n372276	2018	583	589	1435	1441	0	0	No	NA	NA	NA	NA	CAATAAAAAAACAGGAAAACAAATTTCAAGTAAA	34
4	n373397	2028	588	589	1440	1441	0	0	No	NA	NA	NA	NA	TGTTATACCTAAAAGTGCAACAGTTTGCAAATGCAGTAT	39	TCH1516intergenic_2504075-2504339~~~NCTC8325intergenic_2451024-2451288
4	n375286	1415	102	589	1313	1441	0	0	No	0.130862	0.999878	-0.0191488	1.51199	GAAAGATGCTGAAAGCAAAACTCTACACATC	31	USA300HOU_RS10805;DBGWAS_general_tag=hypothetical_protein~~~USA300HOU_RS07920;DBGWAS_general_tag=hypothetical_protein
4	n378100	2029	588	589	1441	1441	0	0	No	NA	NA	NA	NA	GGGTTTAATAGTCCTAAAATGTATGGAGAATTACTTAAAT	40	USA300HOU_RS13490;DBGWAS_general_tag=helicase~~~SAOUHSC_02790;DBGWAS_general_tag=hypothetical_protein
4	n379211	25	25	589	0	1441	0	0	No	NA	NA	NA	NA	CAAAAAAATTTAGACCTTTATCTGGTCTACCT	32
4	n384137	18	18	589	0	1441	0	0	No	NA	NA	NA	NA	TTTTTTAATACTTTCTAATATTTCCTTTCTTAGTCGAC	38
4	n384967	2003	568	589	1435	1441	0	0	No	NA	NA	NA	NA	ACGCACTTAAAACAATCTACAAATAAAATTAT	32	NCTC8325intergenic_2574892-2575196~~~TCH1516intergenic_2626400-2626705
4	n386366	2	2	589	0	1441	0	0	No	NA	NA	NA	NA	CTGAAAACCCTTGGTATTCTGATGTCTAACCCTTCTGAT	39
4	n386367	15	15	589	0	1441	0	0	No	NA	NA	NA	NA	TCTTCTGAAAACCCTTGGTATGCTGATGTCTAACCCTTCTGATTTTTTGTTC	52
4	n386446	396	379	589	17	1441	0	0	No	0.886044	0.999878	-0.00320959	-0.143433	AAAATATGTGGCATTTCTATCTTTCCTTTCG	31
4	n386778	2026	588	589	1438	1441	0	0	No	NA	NA	NA	NA	AATTAAATAAAAAAGATCGCTGCCATTAAACGAAT	35	TCH1516intergenic_2201270-2201638~~~NCTC8325intergenic_2147798-2148166
4	n387504	2	2	589	0	1441	0	0	No	NA	NA	NA	NA	CATCAGAATACCAAGGGTTTTCAGAAGAGATCACGCG	37
4	n388141	3	3	589	0	1441	0	0	No	NA	NA	NA	NA	GTTAGACATCAGAATACCAAGGGTTTTCAGAAGAGA	36
4	n388142	16	16	589	0	1441	0	0	No	NA	NA	NA	NA	GACATCAGCATACCAAGGGTTTTCAGAAGAGATCA	35
4	n388430	2	0	589	2	1441	0	0	No	NA	NA	NA	NA	GTGGAAAATATGGAAAAAGGAGTATGCAAACGAGAGATAAGAAAGGACCGGTAAATAAAAG	61	NCTC8325intergenic_2574892-2575196~~~TCH1516intergenic_2626400-2626705~~~USA300HOU_RS15580;DBGWAS_general_tag=YSIRK_signal_domain/LPXTG_anchor_domain_surface_protein~~~SAOUHSC_02798;DBGWAS_general_tag=hypothetical_protein
4	n389078	15	15	589	0	1441	0	0	No	NA	NA	NA	NA	CAGCATACCAAGGGTTTTCAGAAGAGATCACGCG	34
4	n389269	2016	584	589	1432	1441	0	0	No	NA	NA	NA	NA	CATTTGGATTATTTGGCGCTACAATTCATGAT	32	USA300HOU_RS03360;DBGWAS_general_tag=hypothetical_protein~~~SAOUHSC_00621;DBGWAS_general_tag=hypothetical_protein
4	n390637	2012	582	589	1430	1441	0	0	No	NA	NA	NA	NA	CCAAAGTTATAATAAAACCACATTTTAAATTAAAAA	36	NCTC8325intergenic_1547147-1547620~~~TCH1516intergenic_1644534-1645007
4	n395422	1597	246	589	1351	1441	0	0	No	0.629645	0.999878	-0.00928058	0.482111	AGGAGGAATAACAAATGAACATTCAAGAAGCAAC	34
4	n395980	1	1	589	0	1441	0	0	No	NA	NA	NA	NA	GAACAAAAAATCAGAAGGGTTAGACATCAGAATACCAAG	39
4	n396425	16	7	589	9	1441	0	0	No	NA	NA	NA	NA	AAACAAACATCTTAAAAGGAGGAACAACAAA	31
4	n396889	558	137	589	421	1441	0	0	No	0.945428	0.999878	0.001689	0.068467	AAAGTAGATGCTACTAAAATGCTTTTTTTAACTG	34
4	n396945	17	8	589	9	1441	0	0	No	NA	NA	NA	NA	AACAAACATCTTAAAAGGAGGAACAACAAATG	32
4	n397461	16	16	589	0	1441	0	0	No	NA	NA	NA	NA	AATGAACAAAAAATCAGAAGGGTTAGACATCAG	33	USA300HOU_RS07915;DBGWAS_general_tag=hypothetical_protein
4	n397837	7	6	589	1	1441	0	0	No	NA	NA	NA	NA	TTTGTAACATTTGTTGTTCCTCCTTTTAAGATGTTTG	37
4	n398184	2022	582	589	1440	1441	0	0	No	NA	NA	NA	NA	GATATTAAAATTTTAGAAAATGTAAAAAAATA	32
4	n398381	2021	582	589	1439	1441	0	0	No	NA	NA	NA	NA	ATTTAAAAAAGAAGATTAGAAATTATTTCGA	31	NCTC8325intergenic_2133481-2134740~~~TCH1516intergenic_2186942-2187060
4	n398574	2028	588	589	1440	1441	0	0	No	NA	NA	NA	NA	AGATATTAAAATTTTAGAAAATGTAAAAAAA	31
4	n400054	2018	579	589	1439	1441	0	0	No	NA	NA	NA	NA	AAAGTGGAAAATATGGAAAAAGGAGTATGCAAA	33	NCTC8325intergenic_2574892-2575196~~~TCH1516intergenic_2626400-2626705
4	n401294	380	45	589	335	1441	0	0	No	0.897433	0.999878	0.00204576	0.128705	ATTATACACAACACAAAAATAAAAAGGAGGAA	32
4	n401305	1992	563	589	1429	1441	0	0	No	NA	NA	NA	NA	AATTATTTTATATATTGACGCACTTAAAACAATC	34	NCTC8325intergenic_2574892-2575196~~~TCH1516intergenic_2626400-2626705
4	n402442	2009	585	589	1424	1441	0	0	No	NA	NA	NA	NA	AATTAAAATCATGAATTGTAGCGCCAAATAATCCAA	36	USA300HOU_RS03360;DBGWAS_general_tag=hypothetical_protein~~~SAOUHSC_00621;DBGWAS_general_tag=hypothetical_protein
4	n402445	2027	587	589	1440	1441	0	0	No	NA	NA	NA	NA	TATAAAATCCTTTAATTCTTTCTTAACATTAATTTATA	38	TCH1516intergenic_1100436-1100765~~~NCTC8325intergenic_1006364-1006693
4	n402731	588	577	589	11	1441	0	0	Yes	4.15679e-12	4.8553e-10	-0.158493	-7.54179	GCTTTAATTAAATTAAAATCATGAATTGTAGCGCCAAATA	40	USA300HOU_RS03360;DBGWAS_general_tag=hypothetical_protein~~~SAOUHSC_00621;DBGWAS_general_tag=hypothetical_protein
4	n402739	2019	578	589	1441	1441	0	0	No	NA	NA	NA	NA	AAATTAATTTTATGTAATATAAATACTGCAT	31	TCH1516intergenic_2504075-2504339~~~NCTC8325intergenic_2451024-2451288
4	n403221	2017	585	589	1432	1441	0	0	No	NA	NA	NA	NA	AATCATGAATTGTAGCGCCAAATAATCCAAA	31	USA300HOU_RS03360;DBGWAS_general_tag=hypothetical_protein~~~SAOUHSC_00621;DBGWAS_general_tag=hypothetical_protein
4	n405084	2027	588	589	1439	1441	0	0	No	NA	NA	NA	NA	ATTTAAAAAGACACACCCTAATCACGTTAAATGTG	35	TCH1516intergenic_2504075-2504339~~~NCTC8325intergenic_2451024-2451288
4	n405216	1992	564	589	1428	1441	0	0	No	NA	NA	NA	NA	TAAAATTATTTTATATATTGACGCACTTAAAA	32	NCTC8325intergenic_2574892-2575196~~~TCH1516intergenic_2626400-2626705
4	n405272	2028	588	589	1440	1441	0	0	No	NA	NA	NA	NA	AAAAGACACACCCTAATCACGTTAAATGTGAATAAAGTGTGTCT	44	TCH1516intergenic_2504075-2504339~~~NCTC8325intergenic_2451024-2451288
4	n405526	1990	563	589	1427	1441	0	0	No	NA	NA	NA	NA	AAATTATTTTATATATTGACGCACTTAAAAC	31	NCTC8325intergenic_2574892-2575196~~~TCH1516intergenic_2626400-2626705
4	n405931	2020	581	589	1439	1441	0	0	No	NA	NA	NA	NA	TTAACGTGATTAGGGTGTGTCTTTTTAAATTAA	33	TCH1516intergenic_2504075-2504339~~~NCTC8325intergenic_2451024-2451288
4	n405991	2004	566	589	1438	1441	0	0	No	NA	NA	NA	NA	AATATATAAAATAATTTTATAAAGATAAGTG	31	NCTC8325intergenic_2574892-2575196~~~TCH1516intergenic_2626400-2626705
4	n406388	1991	563	589	1428	1441	0	0	No	NA	NA	NA	NA	TTAAGTGCGTCAATATATAAAATAATTTTATAAA	34	NCTC8325intergenic_2574892-2575196~~~TCH1516intergenic_2626400-2626705
4	n406682	1998	566	589	1432	1441	0	0	No	NA	NA	NA	NA	ACTTATCTTTATAAAATTATTTTATATATTGA	32	NCTC8325intergenic_2574892-2575196~~~TCH1516intergenic_2626400-2626705
4	n407972	1997	565	589	1432	1441	0	0	No	NA	NA	NA	NA	TTATCTTTATAAAATTATTTTATATATTGAC	31	NCTC8325intergenic_2574892-2575196~~~TCH1516intergenic_2626400-2626705
5	n605	1	0	589	1	1441	0	0	No	NA	NA	NA	NA	GTATTAAATTAATATATGAAAAAATATTCACATGAAAGGATTGTCATATAA	51	TCH1516intergenic_2262326-2262477
5	n3077	1	0	589	1	1441	0	0	No	NA	NA	NA	NA	ATTTCTGAATATTGTTCTGACATTATATGAAAATCCTTTCATGTGAATATTTGTTCATATA	61	TCH1516intergenic_2262326-2262477
5	n6000	1	0	589	1	1441	0	0	No	NA	NA	NA	NA	AATATATGAACAAATATTCACATGAAAGGACTGTCATATAATGTCAGAACAATATTCAGAA	61	TCH1516intergenic_2262326-2262477
5	n6001	1493	61	589	1432	1441	0	0	Yes	0.00042762	0.0234588	0.0816224	-3.64581	AAATATTCACATGAAAGGATTGTCATATAAT	31	TCH1516intergenic_2262326-2262477
5	n6002	5	0	589	5	1441	0	0	No	NA	NA	NA	NA	AATTAATATATGAACAAATATTCACATGAAGGGATTGTCATATAATGTCAGAACAATATTC	61	TCH1516intergenic_2262326-2262477
5	n6612	1496	59	589	1437	1441	0	0	No	0.00190402	0.088224	0.0774925	-3.2465	GTATTAAATTAATATATGAACAAATATTCACATGAA	36	TCH1516intergenic_2262326-2262477~~~NCTC8325intergenic_2208855-2209006
5	n7128	2	2	589	0	1441	0	0	No	NA	NA	NA	NA	ATTGACATACTACTGGGAACGTATTAAATTGATATATGAACAAATATTCACATGAAAGGAT	61	TCH1516intergenic_2262326-2262477~~~NCTC8325intergenic_2208855-2209006
5	n8727	1492	61	589	1431	1441	0	0	No	0.00416268	0.175214	0.0635011	-2.96107	TATATGAACAAATATTCACATGAAAGGATTGTCATATAA	39	TCH1516intergenic_2262326-2262477
5	n11218	1490	59	589	1431	1441	0	0	No	0.0114528	0.416417	0.051798	-2.60747	AATATATGAACAAATATTCACATGAAAGGAT	31	TCH1516intergenic_2262326-2262477
5	n11330	1	0	589	1	1441	0	0	No	NA	NA	NA	NA	AATATTCACATGAAAGGATTGTCATATAATATCAGAACAATATTCAGAAATAAATACAGAT	61	TCH1516intergenic_2262326-2262477~~~USA300HOU_RS11580;DBGWAS_general_tag=transcriptional_regulator~~~SAOUHSC_02388;DBGWAS_general_tag=hypothetical_protein
5	n11331	1492	61	589	1431	1441	0	0	Yes	0.00081961	0.0422774	0.073438	-3.45571	AATATTCACATGAAAGGATTGTCATATAATG	31	TCH1516intergenic_2262326-2262477
5	n11860	1492	61	589	1431	1441	0	0	No	0.00658631	0.259317	0.0605974	-2.80947	AATCCTTTCATGTGAATATTTGTTCATATAT	31	TCH1516intergenic_2262326-2262477
5	n12133	1491	59	589	1432	1441	0	0	No	0.0082497	0.314217	0.055859	-2.73297	AATTAATATATGAACAAATATTCACATGAAAGGA	34	TCH1516intergenic_2262326-2262477
5	n15630	2027	586	589	1441	1441	0	0	No	NA	NA	NA	NA	CAGAACAATATTCAGAAATAAATACAGATACATTAGAACGCGTAACTGAAATTTTCAAGGCATTAGGCGATTACAATCGAATACGTATCATGGAATTGTTATC	103	USA300HOU_RS11580;DBGWAS_general_tag=transcriptional_regulator~~~SAOUHSC_02388;DBGWAS_general_tag=hypothetical_protein
5	n70605	3	0	589	3	1441	0	0	No	NA	NA	NA	NA	ATATTCACATGAAAGGATTGTCATATAATGCCAGAACAATATTCAGAAATAAATACAGATA	61	USA300HOU_RS11580;DBGWAS_general_tag=transcriptional_regulator~~~SAOUHSC_02388;DBGWAS_general_tag=hypothetical_protein
5	n70606	2014	584	589	1430	1441	0	0	No	NA	NA	NA	NA	ATGAAAGGATTGTCATATAATGTCAGAACAATATTC	36
5	n72567	2026	586	589	1440	1441	0	0	No	NA	NA	NA	NA	CAATCGAATACGTATCATGGAATTGTTATCAGTCAGCGAAGCAAGTGTTGGTCACATTTCA	61	USA300HOU_RS11580;DBGWAS_general_tag=transcriptional_regulator~~~SAOUHSC_02388;DBGWAS_general_tag=hypothetical_protein
5	n72568	1	0	589	1	1441	0	0	No	NA	NA	NA	NA	CAATCGAATACGTATCATGGAATTGTTATCGGTCAGCGAAGCAAGTGTTGGTCACATTTCA	61	USA300HOU_RS11580;DBGWAS_general_tag=transcriptional_regulator~~~SAOUHSC_02388;DBGWAS_general_tag=hypothetical_protein
5	n90843	2027	586	589	1441	1441	0	0	No	NA	NA	NA	NA	AGACATTTGATTGAGATAAATTCAATTGATGTGAAATGTGACCAACACTTGCTTCGCTGAC	61	USA300HOU_RS11580;DBGWAS_general_tag=transcriptional_regulator~~~SAOUHSC_02388;DBGWAS_general_tag=hypothetical_protein
5	n105371	3	2	589	1	1441	0	0	No	NA	NA	NA	NA	TACTGGGAACGTATTAAATTAATATATGAAAAAATATTCA	40	TCH1516intergenic_2262326-2262477~~~NCTC8325intergenic_2208855-2209006
5	n112478	2	2	589	0	1441	0	0	No	NA	NA	NA	NA	TTATATGACAATCCTTTCATATGAATATTTTTTCATATATTAATTTAATAC	51	NCTC8325intergenic_2208855-2209006
5	n117708	2	2	589	0	1441	0	0	No	NA	NA	NA	NA	TAATATATGAACAAATATTCATATGAAAGGGTTGTCATATAATGTCAGAACAATATTCAGA	61	NCTC8325intergenic_2208855-2209006
5	n290941	1	1	589	0	1441	0	0	No	NA	NA	NA	NA	TACTACTGGGAACGTATTAAATTAATATATTAACAAATATTCATATGAAAGGATTGTCATA	61	TCH1516intergenic_2262326-2262477~~~NCTC8325intergenic_2208855-2209006
5	n297020	2026	585	589	1441	1441	0	0	No	NA	NA	NA	NA	ATCAATTGAATTTATCTCAATCAAATGTCTCGCACCAATTAAAATTACTTAAAAGTGTGCA	61	USA300HOU_RS11580;DBGWAS_general_tag=transcriptional_regulator~~~SAOUHSC_02388;DBGWAS_general_tag=hypothetical_protein
5	n322240	2022	582	589	1440	1441	0	0	No	NA	NA	NA	NA	TAAAAATCAATTGACATACTACTGGGAACGTATTAAATT	39	TCH1516intergenic_2262326-2262477~~~NCTC8325intergenic_2208855-2209006
5	n324397	4	4	589	0	1441	0	0	No	NA	NA	NA	NA	TAAAAATCAATTGACATACTACTGGGAACGCATTAAATTAATATATGAACAAATATTCATA	61	TCH1516intergenic_2262326-2262477~~~NCTC8325intergenic_2208855-2209006
5	n324398	2	2	589	0	1441	0	0	No	NA	NA	NA	NA	ACATACTACTGGGAACGTATTAAATTAATACATGAACAAATATTCATATGAAAGGATTGTC	61	TCH1516intergenic_2262326-2262477~~~NCTC8325intergenic_2208855-2209006
5	n324399	2018	578	589	1440	1441	0	0	No	NA	NA	NA	NA	ACATACTACTGGGAACGTATTAAATTAATATAT	33	TCH1516intergenic_2262326-2262477~~~NCTC8325intergenic_2208855-2209006
5	n324739	2017	577	589	1440	1441	0	0	No	NA	NA	NA	NA	TACTACTGGGAACGTATTAAATTAATATATGAA	33	TCH1516intergenic_2262326-2262477~~~NCTC8325intergenic_2208855-2209006
5	n324929	2014	575	589	1439	1441	0	0	No	NA	NA	NA	NA	TACTGGGAACGTATTAAATTAATATATGAACAAATATT	38	TCH1516intergenic_2262326-2262477~~~NCTC8325intergenic_2208855-2209006
5	n325454	2020	580	589	1440	1441	0	0	No	NA	NA	NA	NA	TATTAATTTAATACGTTCCCAGTAGTATGTCAAT	34	TCH1516intergenic_2262326-2262477~~~NCTC8325intergenic_2208855-2209006
5	n340761	2026	586	589	1440	1441	0	0	No	NA	NA	NA	NA	CCACTTTATGAGATATGTAAAACTTGTTACAACTATAAAAATCAATTGACATACTACTGGGAACG	65	TCH1516intergenic_2262326-2262477~~~NCTC8325intergenic_2208855-2209006
5	n354108	2	0	589	2	1441	0	0	No	NA	NA	NA	NA	ACGTATTAAATTAATATATGAACAAATATTAACATGAAAGGATTGTCATATAATGTCAGAA	61	TCH1516intergenic_2262326-2262477~~~NCTC8325intergenic_2208855-2209006
5	n356313	2012	575	589	1437	1441	0	0	No	NA	NA	NA	NA	ACGTATTAAATTAATATATGAACAAATATTCA	32	TCH1516intergenic_2262326-2262477~~~NCTC8325intergenic_2208855-2209006
5	n356973	516	516	589	0	1441	0	0	No	0.00151227	0.0722208	-0.0728898	-3.26363	TATGAATATTTGTTCATATATTAATTTAATAC	32	TCH1516intergenic_2262326-2262477~~~NCTC8325intergenic_2208855-2209006
5	n366581	2024	586	589	1438	1441	0	0	No	NA	NA	NA	NA	TATCTGTATTTATTTCTGAATATTGTTCTGA	31	USA300HOU_RS11580;DBGWAS_general_tag=transcriptional_regulator~~~SAOUHSC_02388;DBGWAS_general_tag=hypothetical_protein
5	n382548	2019	584	589	1435	1441	0	0	No	NA	NA	NA	NA	TCTGAATATTGTTCTGACATTATATGACAATCC	33
5	n384423	2023	586	589	1437	1441	0	0	No	NA	NA	NA	NA	TCATATAATGTCAGAACAATATTCAGAAATAAATACAGAT	40	USA300HOU_RS11580;DBGWAS_general_tag=transcriptional_regulator~~~SAOUHSC_02388;DBGWAS_general_tag=hypothetical_protein
5	n385336	2022	586	589	1436	1441	0	0	No	NA	NA	NA	NA	ATTTCTGAATATTGTTCTGACATTATATGACA	32
5	n386010	2021	586	589	1435	1441	0	0	No	NA	NA	NA	NA	TTCTGAATATTGTTCTGACATTATATGACAA	31
5	n396772	1	1	589	0	1441	0	0	No	NA	NA	NA	NA	ATCAATTGAATTTATCTCAATCAAATGTCTAGCACCAATTAAAATTACTTAAAAGTGTGCA	61	USA300HOU_RS11580;DBGWAS_general_tag=transcriptional_regulator~~~SAOUHSC_02388;DBGWAS_general_tag=hypothetical_protein
5	n397823	523	523	589	0	1441	0	0	Yes	4.7693e-05	0.00297768	-0.115778	-4.23929	TGTTCTGACATTATATGACAATCCTTTCATATGAATATTT	40	NCTC8325intergenic_2208855-2209006
5	n397824	1489	61	589	1428	1441	0	0	No	0.00246038	0.110003	0.0587577	-3.1046	TTCTGACATTATATGACAATCCTTTCATGTGAATAT	36
5	n397846	1491	61	589	1430	1441	0	0	Yes	0.000434363	0.0237822	0.0710053	-3.60776	ACATGAAAGGATTGTCATATAATGTCAGAACA	32
5	n405514	520	520	589	0	1441	0	0	No	0.00123227	0.060498	-0.0779968	-3.3415	ATTAAATTAATATATGAACAAATATTCATATGAAAGG	37	TCH1516intergenic_2262326-2262477~~~NCTC8325intergenic_2208855-2209006
5	n405774	521	521	589	0	1441	0	0	Yes	0.000617575	0.0326651	-0.0875086	-3.53998	AACAAATATTCATATGAAAGGATTGTCATATAA	33	NCTC8325intergenic_2208855-2209006
5	n405993	518	518	589	0	1441	0	0	No	0.00282893	0.124225	-0.0687473	-3.07326	TAATATATGAACAAATATTCATATGAAAGGATTGTC	36	NCTC8325intergenic_2208855-2209006
5	n407255	520	520	589	0	1441	0	0	No	0.00103227	0.0516743	-0.0795189	-3.38462	ATGAACAAATATTCATATGAAAGGATTGTCATA	33	NCTC8325intergenic_2208855-2209006
6	n647	525	525	589	0	1441	0	0	Yes	2.65212e-07	2.10019e-05	-0.198828	-5.40221	TCATGAAAAAATCAGCTGTTTTAAATGAACATATTTCAAAAGCAATCG	48	SAOUHSC_00240;DBGWAS_general_tag=D-ribose_pyranase~~~USA300HOU_RS01405;DBGWAS_general_tag=D-ribose_pyranase
6	n2336	1	1	589	0	1441	0	0	No	NA	NA	NA	NA	GTTCATTTAAAACAGCTGATTTTTTCATGAAATCTACACTCCTTATTTTATAAATACTGTA	61	SAOUHSC_00240;DBGWAS_general_tag=D-ribose_pyranase
6	n2337	524	524	589	0	1441	0	0	Yes	1.03109e-05	0.000686572	-0.153244	-4.59304	GTTCATTTAAAACAGCTGATTTTTTCATGACATCTACACTCCT	43	SAOUHSC_00240;DBGWAS_general_tag=D-ribose_pyranase
6	n22088	2030	589	589	1441	1441	0	0	No	NA	NA	NA	NA	TTTTAAATGAACATATTTCAAAAGCAATCGCGACAATTGGTCATTTTGATTTATTAACGATTAATGACGCTGGCATGCCAATTCCAAATGATCATCGTCGTATCGA	106	SAOUHSC_00240;DBGWAS_general_tag=D-ribose_pyranase~~~USA300HOU_RS01405;DBGWAS_general_tag=D-ribose_pyranase
6	n92350	3	0	589	3	1441	0	0	No	NA	NA	NA	NA	CATTTCTTCTAACACTGTAGCTAAGACATCGATAAAGCGTGGTAAGTTTTTAGTTACAGCT	61	SAOUHSC_00240;DBGWAS_general_tag=D-ribose_pyranase~~~USA300HOU_RS01405;DBGWAS_general_tag=D-ribose_pyranase
6	n124263	1	1	589	0	1441	0	0	No	NA	NA	NA	NA	TTACCACGCTTTATTGATGTCTTAGCTACAATGTTAGAAGAAATGGAAATCCAAAAAATAT	61	SAOUHSC_00240;DBGWAS_general_tag=D-ribose_pyranase~~~USA300HOU_RS01405;DBGWAS_general_tag=D-ribose_pyranase
6	n131026	2030	589	589	1441	1441	0	0	No	NA	NA	NA	NA	CGGCTACTAAAATGAGTACTAAGCCGATGATTGTAATAACC	41	USA300HOU_RS01410;DBGWAS_general_tag=ribose_transporter_RbsU~~~SAOUHSC_00241;DBGWAS_general_tag=hypothetical_protein
6	n133742	2028	589	589	1439	1441	0	0	No	NA	NA	NA	NA	ATAAAACGTCAAAAGAAATGGTTATTACAATCATCGGCTTAGTACTCAT	49	USA300HOU_RS01410;DBGWAS_general_tag=ribose_transporter_RbsU~~~SAOUHSC_00241;DBGWAS_general_tag=hypothetical_protein
6	n140547	2	0	589	2	1441	0	0	No	NA	NA	NA	NA	TCTTAAAACAACATAAAACGTCAAAAGAAACGGTTATTACAATCATCGGCTTAGTACTCAT	61	USA300HOU_RS01410;DBGWAS_general_tag=ribose_transporter_RbsU~~~SAOUHSC_00241;DBGWAS_general_tag=hypothetical_protein
6	n141361	2	2	589	0	1441	0	0	No	NA	NA	NA	NA	GCCAATTCCAAATGATCATCGTCGTATCGATCTAGCTGTAACTAAAAACTTACCACGCTTT	61	SAOUHSC_00240;DBGWAS_general_tag=D-ribose_pyranase~~~USA300HOU_RS01405;DBGWAS_general_tag=D-ribose_pyranase
6	n180891	1486	64	589	1422	1441	0	0	No	0.00348563	0.148952	0.0592677	-2.9717	AATATGTTCATTTAAAATAGCTGATTTTTTCATGACATCTACACTCCT	48	USA300HOU_RS01405;DBGWAS_general_tag=D-ribose_pyranase
6	n180892	19	0	589	19	1441	0	0	No	NA	NA	NA	NA	AATATGTTCATTTAAAATAGCTGATTTTTTTCATGACATCTACACTCCTTATTTT	55
6	n217614	1505	64	589	1441	1441	0	0	Yes	2.65212e-07	2.10019e-05	0.198828	-5.40221	AAAAAATCAGCTATTTTAAATGAACATATTTCAAAAGCAATCG	43	SAOUHSC_00240;DBGWAS_general_tag=D-ribose_pyranase~~~USA300HOU_RS01405;DBGWAS_general_tag=D-ribose_pyranase
6	n262842	1	1	589	0	1441	0	0	No	NA	NA	NA	NA	CCAAATGATCATCGTCGTATCGACCTAGCTATAACTAAAAACTTACCACGCTTTATTGATG	61	SAOUHSC_00240;DBGWAS_general_tag=D-ribose_pyranase~~~USA300HOU_RS01405;DBGWAS_general_tag=D-ribose_pyranase
6	n265275	2010	588	589	1422	1441	0	0	No	NA	NA	NA	NA	AAAATAAGGAGTGTAGATGTCATGAAAAAATCAGCT	36
6	n266826	2027	586	589	1441	1441	0	0	No	NA	NA	NA	NA	CCAAATGATCATCGTCGTATCGACCTAGCTGTAACTAAAAACTTACCACGCTTT	54	SAOUHSC_00240;DBGWAS_general_tag=D-ribose_pyranase~~~USA300HOU_RS01405;DBGWAS_general_tag=D-ribose_pyranase
6	n268778	2028	587	589	1441	1441	0	0	No	NA	NA	NA	NA	GCCAATTCCAAATGATCATCGTCGTATCGACCTAGCT	37	SAOUHSC_00240;DBGWAS_general_tag=D-ribose_pyranase~~~USA300HOU_RS01405;DBGWAS_general_tag=D-ribose_pyranase
6	n269814	2029	588	589	1441	1441	0	0	No	NA	NA	NA	NA	TTTTTTCATGACATCTACACTCCTTATTTTATAAATACTGTA	42
6	n271242	2030	589	589	1441	1441	0	0	No	NA	NA	NA	NA	ATCTACACTCCTTATTTTATAAATACTGTAACAGAA	36
6	n309968	6	0	589	6	1441	0	0	No	NA	NA	NA	NA	ACTCCTTATTTTATAAATACTGTAACAGAAACGGCTACTAAAATGAGTACTAAGCCGATGA	61	USA300HOU_RS01410;DBGWAS_general_tag=ribose_transporter_RbsU~~~SAOUHSC_00241;DBGWAS_general_tag=hypothetical_protein
6	n326397	2029	588	589	1441	1441	0	0	No	NA	NA	NA	NA	GATGTCTTAGCTACAGTGTTAGAAGAAATGGAAATCCAAAAA	42	SAOUHSC_00240;DBGWAS_general_tag=D-ribose_pyranase~~~USA300HOU_RS01405;DBGWAS_general_tag=D-ribose_pyranase
6	n372123	2024	589	589	1435	1441	0	0	No	NA	NA	NA	NA	ACTCCTTATTTTATAAATACTGTAACAGAAGCGGCTACTAAAATGAGTACTAAGCCGATGA	61	USA300HOU_RS01410;DBGWAS_general_tag=ribose_transporter_RbsU~~~SAOUHSC_00241;DBGWAS_general_tag=hypothetical_protein
6	n381303	2026	588	589	1438	1441	0	0	No	NA	NA	NA	NA	TTACCACGCTTTATTGATGTCTTAGCTACAGTGTTAGAAGAAATG	45	SAOUHSC_00240;DBGWAS_general_tag=D-ribose_pyranase~~~USA300HOU_RS01405;DBGWAS_general_tag=D-ribose_pyranase
6	n392880	2027	589	589	1438	1441	0	0	No	NA	NA	NA	NA	TAACTAAAAACTTACCACGCTTTATTGATGTCTTAGCTACA	41	SAOUHSC_00240;DBGWAS_general_tag=D-ribose_pyranase~~~USA300HOU_RS01405;DBGWAS_general_tag=D-ribose_pyranase
6	n393888	2026	588	589	1438	1441	0	0	No	NA	NA	NA	NA	CATCAATAAAGCGTGGTAAGTTTTTAGTTACAGCT	35	SAOUHSC_00240;DBGWAS_general_tag=D-ribose_pyranase~~~USA300HOU_RS01405;DBGWAS_general_tag=D-ribose_pyranase
6	n394824	2029	588	589	1441	1441	0	0	No	NA	NA	NA	NA	ATAAAGCGTGGTAAGTTTTTAGTTACAGCTAG	32	SAOUHSC_00240;DBGWAS_general_tag=D-ribose_pyranase~~~USA300HOU_RS01405;DBGWAS_general_tag=D-ribose_pyranase
7	n658	1	1	589	0	1441	0	0	No	NA	NA	NA	NA	CGGTTGAGGTGATTCCATTTGGATAAAAAATCTTATAATTTAAAGCGAACTTTTGAACAAC	61	USA300HOU_RS03325;DBGWAS_general_tag=hypothetical_protein
7	n845	9	5	589	4	1441	0	0	No	NA	NA	NA	NA	CCATTTGGATAAAAAAGCTTATAATTTAAAACGGACTTTTGAACAACCGATAGTGATGTAT	61
7	n846	1690	254	589	1436	1441	0	0	Yes	0.000207478	0.011943	0.0748734	-3.71847	TTTGGATAAAAAAGCTTATAATTTAAAGCGAACTTTTGAACA	42	USA300HOU_RS03325;DBGWAS_general_tag=hypothetical_protein
7	n889	1	1	589	0	1441	0	0	No	NA	NA	NA	NA	GGTTGAGGTGATTCCATTTGGATAAAAAAGTTTATAATTTAAAGCGAACTTTTGAACAACC	61	USA300HOU_RS03325;DBGWAS_general_tag=hypothetical_protein
7	n6812	1698	263	589	1435	1441	0	0	No	0.683575	0.999878	-0.00912515	0.407379	CTTATCTGTAAATTCATACATAACTATCGGTTGTTCAAAAGT	42	USA300HOU_RS03325;DBGWAS_general_tag=hypothetical_protein
7	n6813	32	25	589	7	1441	0	0	No	NA	NA	NA	NA	ATCTAAACGAAAACCCTTATTAATACGAAATTTATCTGTAAATTCATACATCACTATCGGTTGTTCAAAAGTCCG	75	USA300HOU_RS03325;DBGWAS_general_tag=hypothetical_protein
7	n6814	8	7	589	1	1441	0	0	No	NA	NA	NA	NA	AACCCAAAAATCTAAACGAAAACCCTTATTGATACGAAACTTATCTGTAAATTCATACATGACTATCGGTTGTTCAAAAGTTCGCTTTAAA	91	USA300HOU_RS03325;DBGWAS_general_tag=hypothetical_protein
7	n8125	1693	258	589	1435	1441	0	0	No	0.780113	0.999878	-0.00593857	0.279057	TTTAAAGCGAACTTTTGAACAACCGATAGTTATGTATGAA	40	USA300HOU_RS03325;DBGWAS_general_tag=hypothetical_protein
7	n8157	5	5	589	0	1441	0	0	No	NA	NA	NA	NA	TTTAAAGCGGACTTTTGAACAACCGATAGTTATGTATGAA	40	USA300HOU_RS03325;DBGWAS_general_tag=hypothetical_protein
7	n8158	23	20	589	3	1441	0	0	No	NA	NA	NA	NA	TTTAAAGCGGACTTTTGAACAACCGATAGTGATGTAT	37
7	n12192	8	7	589	1	1441	0	0	No	NA	NA	NA	NA	CATAATTACAGGCTGTAATAAATACCAAAACAACAAAAATAATATAAACCATACAATTAAAAATGTAACCCAAAAATCTAAACGAAAA	88
7	n17062	28	25	589	3	1441	0	0	No	NA	NA	NA	NA	ACTATCGGTTGTTCAAAAGTCCGCTTTAAATTATAAGCTTTTTTATCCAAA	51	USA300HOU_RS03325;DBGWAS_general_tag=hypothetical_protein
7	n17063	1700	264	589	1436	1441	0	0	No	0.784214	0.999878	-0.00628775	0.273704	ACTATCGGTTGTTCAAAAGTTCGCTTTAAATTATA	35	USA300HOU_RS03325;DBGWAS_general_tag=hypothetical_protein
7	n23065	1689	253	589	1436	1441	0	0	Yes	0.000128652	0.00764088	0.0757745	-3.83765	AGCTTATAATTTAAAGCGAACTTTTGAACAAC	32	USA300HOU_RS03325;DBGWAS_general_tag=hypothetical_protein
7	n23066	1	1	589	0	1441	0	0	No	NA	NA	NA	NA	AGCTTATAATTTAAAGCGAACTTTTGAACAGCCGATAGTTATGTATGAATTTACAGATAAG	61	USA300HOU_RS03325;DBGWAS_general_tag=hypothetical_protein
7	n24229	11	8	589	3	1441	0	0	No	NA	NA	NA	NA	GTTGAGGTGATTCCATTTGGATAAAAAAGCCTATAATTTAAAGCGAACTTTTGAACAACCG	61	USA300HOU_RS03325;DBGWAS_general_tag=hypothetical_protein
7	n24595	1691	255	589	1436	1441	0	0	No	0.993957	0.999878	-0.000159607	0.00767457	CTTATAATTTAAAGCGAACTTTTGAACAACC	31	USA300HOU_RS03325;DBGWAS_general_tag=hypothetical_protein
7	n65457	21	14	589	7	1441	0	0	No	NA	NA	NA	NA	AAAAATGTAACCCAAAAATCTAAACGAAAACCCTTATT	38	USA300HOU_RS03325;DBGWAS_general_tag=hypothetical_protein
7	n81034	13	7	589	6	1441	0	0	No	NA	NA	NA	NA	ACAATCAAAAATGTAACCCAAAAATCTAAACGAAAA	36
7	n86373	1718	281	589	1437	1441	0	0	Yes	5.33708e-07	4.08783e-05	0.127063	-5.03464	TTTAAATTATAAGCTTTTTTATCCAAATGGAATCACCTCAAC	42
7	n97949	1692	256	589	1436	1441	0	0	No	0.976422	0.999878	-0.000644099	0.0296891	CGGTTGTTCAAAAGTTCGCTTTAAATTATAA	31	USA300HOU_RS03325;DBGWAS_general_tag=hypothetical_protein
7	n179620	1564	139	589	1425	1441	0	0	No	0.66863	0.999878	0.00883962	-0.427779	ATTAAATACCTGTTCAGGACCTTTAGAAACTAAGAATAAA	40	USA300HOU_RS03330;DBGWAS_general_tag=hypothetical_protein
7	n181286	190	155	589	35	1441	0	0	No	NA	NA	NA	NA	ATTAAACACTTGTTCAGGACCTTTAGAAACTAA	33
7	n181726	187	152	589	35	1441	0	0	No	NA	NA	NA	NA	CCAGAAATTGCATTAAACACTTGTTCAGGACCTTTAGAAAC	41
7	n181743	3	3	589	0	1441	0	0	No	NA	NA	NA	NA	CAAAAATCATTTTCCAAATACCAGAAATTGTATTAAACACTTGTTCAGGACCTTTAGAAAC	61
7	n183189	1706	269	589	1437	1441	0	0	No	0.754739	0.999878	-0.00795448	0.312241	TTTTATTCTTAGTTTCTAAAGGTCCTGAACA	31	USA300HOU_RS03330;DBGWAS_general_tag=hypothetical_protein
7	n206756	1705	278	589	1427	1441	0	0	No	0.782464	0.999878	-0.00550102	0.275996	ACAATCAAAAATGTAGCCCAAAAATCTAAACGAAAAC	37	USA300HOU_RS03325;DBGWAS_general_tag=hypothetical_protein
7	n207622	1	1	589	0	1441	0	0	No	NA	NA	NA	NA	AAAATGTAGCCCAAAAATCTAAACGAAAACTCTTATTAATACGAAACTTATCTGTAAATTC	61	USA300HOU_RS03325;DBGWAS_general_tag=hypothetical_protein
7	n208169	5	0	589	5	1441	0	0	No	NA	NA	NA	NA	ACAAAAATAATATAAACCACACAATCAAAATGTAGCCCAAAAATCTAAACGAAAAC	56	USA300HOU_RS03325;DBGWAS_general_tag=hypothetical_protein
7	n217621	1720	284	589	1436	1441	0	0	No	0.96988	0.999878	0.00115075	-0.0377362	CCAAAAATCTAAACGAAAACCCTTATTAATACGAAA	36	USA300HOU_RS03325;DBGWAS_general_tag=hypothetical_protein
7	n217622	2	1	589	1	1441	0	0	No	NA	NA	NA	NA	CCAAAAATCTAAACGAAAACCCTTATTAATGCGAAACTTATCTGTAAATTCATACATAACT	61	USA300HOU_RS03325;DBGWAS_general_tag=hypothetical_protein
7	n218013	1697	262	589	1435	1441	0	0	No	0.704839	0.999878	-0.00826209	0.378678	ATCTAAACGAAAACCCTTATTAATACGAAACTTATCTGTAAATTC	45	USA300HOU_RS03325;DBGWAS_general_tag=hypothetical_protein
7	n221162	13	7	589	6	1441	0	0	No	NA	NA	NA	NA	AACCCAAAAATCTAAACGAAAACCCTTATTAA	32	USA300HOU_RS03325;DBGWAS_general_tag=hypothetical_protein
7	n221732	1710	278	589	1432	1441	0	0	No	0.82538	0.999878	-0.00549889	0.220599	TTAATAAGGGTTTTCGTTTAGATTTTTGGGCTA	33	USA300HOU_RS03325;DBGWAS_general_tag=hypothetical_protein
7	n225833	1721	285	589	1436	1441	0	0	No	0.867834	0.999878	-0.00557755	0.166304	ATTAATAAGGGTTTTCGTTTAGATTTTTGGG	31	USA300HOU_RS03325;DBGWAS_general_tag=hypothetical_protein
7	n227967	179	145	589	34	1441	0	0	No	NA	NA	NA	NA	CAAAAATCATTTTCCAAATACCAGAAATTGCATTAAACACTTGTTCAGGA	50
7	n227968	8	7	589	1	1441	0	0	No	NA	NA	NA	NA	ACCTCAACCGCCAAAAATCATTTTCCAAATTCCAGAAATTGCATTAAACACTTGTTCAGGA	61
7	n231336	1564	139	589	1425	1441	0	0	No	0.66863	0.999878	0.00883962	-0.427779	CACCTCAACCGCCAAAAATCATTTTCCAAACACCTGCAATCG	42	USA300HOU_RS03330;DBGWAS_general_tag=hypothetical_protein
7	n231337	182	148	589	34	1441	0	0	No	NA	NA	NA	NA	ACCTCAACCGCCAAAAATCATTTTCCAAATACCAGAAATTG	41
7	n235266	1728	291	589	1437	1441	0	0	No	0.862878	0.999878	0.00808402	-0.172903	TTTTTTATCCAAATGGAATCACCTCAACCGCCAAAAATCATTTTCCAAA	49
7	n235857	190	155	589	35	1441	0	0	No	NA	NA	NA	NA	ATTTGGAAAATGATTTTTGGCGGTTGAGGTG	31
7	n256324	1563	139	589	1424	1441	0	0	No	0.687913	0.999878	0.00806031	-0.401457	CAAAAATCATTTTCCAAACACCTGCAATCGCATTAAATACCTGTTCAGGACCTTTAGAAAC	61	USA300HOU_RS03330;DBGWAS_general_tag=hypothetical_protein
7	n256325	1	0	589	1	1441	0	0	No	NA	NA	NA	NA	CAAAAATCATTTTCCAAACACCTGCAATCGTATTAAATACCTGTTCAGGACCTTTAGAAAC	61	USA300HOU_RS03330;DBGWAS_general_tag=hypothetical_protein
7	n281951	1699	264	589	1435	1441	0	0	No	0.523085	0.999878	-0.0146635	0.638294	CGAAACTTATCTGTAAATTCATACATAACTATCGG	35	USA300HOU_RS03325;DBGWAS_general_tag=hypothetical_protein
7	n283884	1698	263	589	1435	1441	0	0	No	0.631621	0.999878	-0.0106409	0.479231	CTTATTAATACGAAACTTATCTGTAAATTCATACATAACT	40	USA300HOU_RS03325;DBGWAS_general_tag=hypothetical_protein
7	n385377	1713	277	589	1436	1441	0	0	Yes	3.98281e-06	0.000275679	0.107149	-4.63051	CCATTTGGATAAAAAAGCTTATAATTTAAAGCG	33	USA300HOU_RS03325;DBGWAS_general_tag=hypothetical_protein
7	n389444	1727	290	589	1437	1441	0	0	Yes	4.28116e-13	5.40602e-11	0.284029	-7.392	CTTTTTTATCCAAATGGAATCACCTCAACCG	31
7	n389739	1726	289	589	1437	1441	0	0	Yes	2.90811e-10	2.96447e-08	0.212258	-6.37063	GCTTTTTTATCCAAATGGAATCACCTCAACC	31
8	n708	1	1	589	0	1441	0	0	No	NA	NA	NA	NA	ATATTTAAGATATAATAAGGCTTTCAAAAAATTTAAAACTTAAAATAATAACTAAA	56	USA300HOU_RS14770;DBGWAS_general_tag=beta-lactam_sensor/signal_transducer_BlaR1
8	n1620	7	6	589	1	1441	0	0	No	NA	NA	NA	NA	TTTCAAAAATTTAAAACTTAAAATAATAACCAAAACTATCCAAATAACTGTGCAGATATTA	61	USA300HOU_RS14770;DBGWAS_general_tag=beta-lactam_sensor/signal_transducer_BlaR1
8	n1621	1613	432	589	1181	1441	0	0	No	0.460661	0.999878	-0.0134978	0.737441	AAAAATTTAAAACTTAAAATAATAACTAAAA	31	USA300HOU_RS14770;DBGWAS_general_tag=beta-lactam_sensor/signal_transducer_BlaR1
8	n1622	1	0	589	1	1441	0	0	No	NA	NA	NA	NA	AAAAATTTAAAACTTAAAATAATAACTAAACTATCCAAATAACTGTGCAGATATTAT	57	USA300HOU_RS14770;DBGWAS_general_tag=beta-lactam_sensor/signal_transducer_BlaR1
8	n2472	5	0	589	5	1441	0	0	No	NA	NA	NA	NA	ATTTAAAACTTAAAATAATAACTAAAACTACCCAAATAACTGTGCAGATATTATCAATTGA	61	USA300HOU_RS14770;DBGWAS_general_tag=beta-lactam_sensor/signal_transducer_BlaR1
8	n3300	1614	432	589	1182	1441	0	0	No	0.513298	0.999878	-0.0123762	0.653417	AAAATTTAAAACTTAAAATAATAACTAAAACTA	33	USA300HOU_RS14770;DBGWAS_general_tag=beta-lactam_sensor/signal_transducer_BlaR1
8	n7702	149	147	589	2	1441	0	0	No	NA	NA	NA	NA	GATAAAGTGACTGTTTCTTTAAATACTTAAGATATAATAAAGAATTTAAAAATTTAAAACTTAAAATAATAACTAAA	77
8	n7707	1	1	589	0	1441	0	0	No	NA	NA	NA	NA	GATAAAGTGACTGTTTCTTTAAATACTTAATAGATAATAAAGAATTTAGAAATTTAAAACTGAAAATAATAACTAAAACTATCCAAATAACT	92
8	n8100	1	1	589	0	1441	0	0	No	NA	NA	NA	NA	CTGTTTCTTTAAATATTTAAGATATAATAAAGCTTTCAAAAATTTAAAACTTAAAATAATA	61	USA300HOU_RS14770;DBGWAS_general_tag=beta-lactam_sensor/signal_transducer_BlaR1
8	n13843	2	2	589	0	1441	0	0	No	NA	NA	NA	NA	GTTCATGAGTTTACAACAGACATCCATAAGATTAATTGGGATTCAATAGATAATATCTGCA	61
8	n14500	145	145	589	0	1441	0	0	No	NA	NA	NA	NA	CATGAGTTTACAACAGACATCCATAAGTTTAATTGGGATTCAATAGATAATATCTGCA	58
8	n17966	1	0	589	1	1441	0	0	No	NA	NA	NA	NA	AGTGACTGTTTCTTTAAATATTTAAGATATTAATAAGGCTTTTCAAAAATTTAAAACTTAAAATAATAAC	70	USA300HOU_RS14770;DBGWAS_general_tag=beta-lactam_sensor/signal_transducer_BlaR1
8	n20923	80	79	589	1	1441	0	0	No	NA	NA	NA	NA	TATTATTTTAAGTTTTAAATTTTTGAAATCATTATTATATCTTAAATATTTAAAGAAACAG	61	USA300HOU_RS14770;DBGWAS_general_tag=beta-lactam_sensor/signal_transducer_BlaR1
8	n20924	10	7	589	3	1441	0	0	No	NA	NA	NA	NA	TATTATTTTAAGTTTTAAATTTTTGAAATCCTTATTATATCTTAAATATTTAAAGA	56	USA300HOU_RS14770;DBGWAS_general_tag=beta-lactam_sensor/signal_transducer_BlaR1
8	n20925	1392	213	589	1179	1441	0	0	No	0.510186	0.999878	-0.0131435	0.658228	TATTATTTTAAGTTTTAAATTTTTGAAAGCCTTATTATATCTTAAA	46	USA300HOU_RS14770;DBGWAS_general_tag=beta-lactam_sensor/signal_transducer_BlaR1
8	n21401	90	86	589	4	1441	0	0	No	NA	NA	NA	NA	GATTTCAAAAATTTAAAACTTAAAATAATAAC	32	USA300HOU_RS14770;DBGWAS_general_tag=beta-lactam_sensor/signal_transducer_BlaR1
8	n23320	1472	293	589	1179	1441	0	0	No	0.313896	0.999878	-0.0211591	1.00677	TTTAGTTATTATTTTAAGTTTTAAATTTTTGAAA	34	USA300HOU_RS14770;DBGWAS_general_tag=beta-lactam_sensor/signal_transducer_BlaR1
8	n23321	2	0	589	2	1441	0	0	No	NA	NA	NA	NA	TTTTAGTTATTATTTTAAGTTTTAAATTTTGAAAGCCTTATTATATCTTAAATATT	56	USA300HOU_RS14770;DBGWAS_general_tag=beta-lactam_sensor/signal_transducer_BlaR1
8	n24676	1391	214	589	1177	1441	0	0	No	0.499041	0.999878	-0.0140165	0.675674	GCTTTCAAAAATTTAAAACTTAAAATAATAAC	32	USA300HOU_RS14770;DBGWAS_general_tag=beta-lactam_sensor/signal_transducer_BlaR1
8	n25283	1	1	589	0	1441	0	0	No	NA	NA	NA	NA	AAATTTTTGAAAGCCTTATTATATCTTAAACATTTAAAGAAACAGTCACTTTATCTAAACG	61	USA300HOU_RS14770;DBGWAS_general_tag=beta-lactam_sensor/signal_transducer_BlaR1
8	n25284	1474	292	589	1182	1441	0	0	Yes	0.000483688	0.0261257	0.0726578	-3.5289	TTATTATATCTTAAATATTTAAAGAAACAGTCACT	35	USA300HOU_RS14770;DBGWAS_general_tag=beta-lactam_sensor/signal_transducer_BlaR1
8	n60001	2	1	589	1	1441	0	0	No	NA	NA	NA	NA	GTCACTTTATCTAAACGAAAATGAAAAAAAATAAAATAGATACGATACTTTTCA	54
8	n60002	1431	250	589	1181	1441	0	0	No	0.625207	0.999878	0.0098618	-0.488628	GTCACTTTATCTAAACGAAAATGAAAAAAATAAA	34
8	n60003	3	1	589	2	1441	0	0	No	NA	NA	NA	NA	TATTTAAAGAAACAGTCACTTTATCTAAATAAAAAAGAAAAAAATAAAATAAATAAGATACTTTTCAATCATCAATATAAAAGA	84
8	n60004	122	122	589	0	1441	0	0	No	NA	NA	NA	NA	CAGTCACTTTATCTAAATGAAAAAGAAAAAAATAAAATAAACAAGATACTTTT	53
8	n60005	25	25	589	0	1441	0	0	No	NA	NA	NA	NA	CAGTCACTTTATCTAAATGAAAAAGAAAAAGATAAAATAAACAAGATACTTTTCAATCATC	61
8	n60006	1	0	589	1	1441	0	0	No	NA	NA	NA	NA	AAAGAAACAGTCACTTTATCTAAATGAAAATGAAAAAAATAAAATAGATACGATA	55
8	n63277	1432	250	589	1182	1441	0	0	No	0.598595	0.999878	0.0108116	-0.52663	ACAGTCACTTTATCTAAACGAAAATGAAAAAAA	33
8	n90979	147	147	589	0	1441	0	0	No	NA	NA	NA	NA	TTAATTGGGATTCAATAGATAATATCTGCACAGTTATTTGGATAGTT	47	USA300HOU_RS14770;DBGWAS_general_tag=beta-lactam_sensor/signal_transducer_BlaR1
8	n90981	1	1	589	0	1441	0	0	No	NA	NA	NA	NA	TCGCAACAGATATCCATAAGTTTAATTGGGGTTCAATTGATAATATCTGCACAGTTATTTG	61	USA300HOU_RS14770;DBGWAS_general_tag=beta-lactam_sensor/signal_transducer_BlaR1
8	n94168	1482	299	589	1183	1441	0	0	No	0.265919	0.999878	-0.0245998	1.11221	AACTGTGCAGATATTATCAATTGAATCCCAAT	32	USA300HOU_RS14770;DBGWAS_general_tag=beta-lactam_sensor/signal_transducer_BlaR1
8	n99298	2	0	589	2	1441	0	0	No	NA	NA	NA	NA	ACCATCAATATAAAAAAAATATTGTGATTCAAAAAGCAGAGGCTATTCAATCTCCAATAAC	61	USA300HOU_RS14770;DBGWAS_general_tag=beta-lactam_sensor/signal_transducer_BlaR1
8	n107214	149	147	589	2	1441	0	0	No	NA	NA	NA	NA	TTGGAGAATGAATAGATTCTGCTTTTCGAATCACAATATTTCTTTTATA	49
8	n115606	83	80	589	3	1441	0	0	No	NA	NA	NA	NA	AACTTAAAATAATAACTAAAACTATCCAAACAACTGTGCAGATATTATCAATTGAATCCCA	61	USA300HOU_RS14770;DBGWAS_general_tag=beta-lactam_sensor/signal_transducer_BlaR1
8	n115607	1534	358	589	1176	1441	0	0	No	0.9055	0.999878	-0.00202699	0.118635	AAAACTATCCAAATAACTGTGCAGATATTAT	31	USA300HOU_RS14770;DBGWAS_general_tag=beta-lactam_sensor/signal_transducer_BlaR1
8	n117080	1534	358	589	1176	1441	0	0	No	0.9055	0.999878	-0.00202699	0.118635	AAACTATCCAAATAACTGTGCAGATATTATC	31	USA300HOU_RS14770;DBGWAS_general_tag=beta-lactam_sensor/signal_transducer_BlaR1
8	n117438	1401	220	589	1181	1441	0	0	No	0.493489	0.999878	-0.0134067	0.68444	CAAATAACTGTGCAGATATTATCAATTGAATCCCA	35	USA300HOU_RS14770;DBGWAS_general_tag=beta-lactam_sensor/signal_transducer_BlaR1
8	n120124	1532	357	589	1175	1441	0	0	No	0.828842	0.999878	-0.00377513	0.216063	AAAATAATAACTAAAACTATCCAAATAACTGTGCAGATATTA	42	USA300HOU_RS14770;DBGWAS_general_tag=beta-lactam_sensor/signal_transducer_BlaR1
8	n120168	1397	221	589	1176	1441	0	0	No	0.576926	0.999878	-0.0101512	0.557612	AACTATCCAAATAACTGTGCAGATATTATCAATTGA	36	USA300HOU_RS14770;DBGWAS_general_tag=beta-lactam_sensor/signal_transducer_BlaR1
8	n128232	1402	221	589	1181	1441	0	0	No	0.571445	0.999878	-0.0112745	0.565634	CCAAATAACTGTGCAGATATTATCAATTGAA	31	USA300HOU_RS14770;DBGWAS_general_tag=beta-lactam_sensor/signal_transducer_BlaR1
8	n167105	50	50	589	0	1441	0	0	No	NA	NA	NA	NA	ATATCTTAAATATTTAAAGAAACAGTCACTCTATCTAAACGAAAATGAAAAAAATAAAATA	61	USA300HOU_RS14770;DBGWAS_general_tag=beta-lactam_sensor/signal_transducer_BlaR1
8	n180173	1	1	589	0	1441	0	0	No	NA	NA	NA	NA	GAAAATGAAAAAAATAAAATAGATACGATATTTTTCAACCATCAATATAAAAAAAATATTG	61
8	n196580	1	1	589	0	1441	0	0	No	NA	NA	NA	NA	TATAAAAGAAATATTGTGATTCGAAAAGCAAGTCAAGTCCAGACTCCTGTGTAAA	55
8	n200142	150	148	589	2	1441	0	0	No	NA	NA	NA	NA	AATCATCAATATAAAAGAAATATTGTGATTCGAAAAGCA	39
8	n200273	1	1	589	0	1441	0	0	No	NA	NA	NA	NA	AATCACAATATTTCTTTTATATTGATGATTAAAAAGTATCTTGTTTATTTTATTTTTTTCT	61
8	n200274	149	147	589	2	1441	0	0	No	NA	NA	NA	NA	AATCACAATATTTCTTTTATATTGATGATTGAAAAGTATCTT	42
8	n227594	1480	298	589	1182	1441	0	0	No	0.37552	0.999878	-0.0190604	0.886016	AAAAAAATAAAATAGATACGATACTTTTCAACCATCAATATA	42	USA300HOU_RS14770;DBGWAS_general_tag=beta-lactam_sensor/signal_transducer_BlaR1
8	n228808	1479	298	589	1181	1441	0	0	No	0.369053	0.999878	-0.0189251	0.898201	GAAAATGAAAAAAATAAAATAGATACGATACTTTTCA	37
8	n229443	1479	299	589	1180	1441	0	0	No	0.333622	0.999878	-0.020404	0.966633	TATCTAAACGAAAATGAAAAAAATAAAATAGATACGATA	39
8	n238502	3	1	589	2	1441	0	0	No	NA	NA	NA	NA	CTTTATCTAAACGAAAATGAAAAAAATAAAGTAGATACGATACTTTTCAACCATCAATATA	61	USA300HOU_RS14770;DBGWAS_general_tag=beta-lactam_sensor/signal_transducer_BlaR1
8	n255253	1394	213	589	1181	1441	0	0	Yes	0.000119946	0.00715412	0.0768901	-3.88635	CCTTATTATATCTTAAATATTTAAAGAAACAG	32	USA300HOU_RS14770;DBGWAS_general_tag=beta-lactam_sensor/signal_transducer_BlaR1
8	n255254	7	6	589	1	1441	0	0	No	NA	NA	NA	NA	AATCCTTATTATATCTTAAATATTTAAAGAGACAGTCACTTTATCTAAACGAAAATGAAAA	61	USA300HOU_RS14770;DBGWAS_general_tag=beta-lactam_sensor/signal_transducer_BlaR1
8	n255668	3	1	589	2	1441	0	0	No	NA	NA	NA	NA	AATCCTTATTATATCTTAAATATTTAAAGAAAC	33	USA300HOU_RS14770;DBGWAS_general_tag=beta-lactam_sensor/signal_transducer_BlaR1
8	n255876	1392	212	589	1180	1441	0	0	Yes	0.000230553	0.01319	0.074784	-3.72497	TTTTGAAAGCCTTATTATATCTTAAATATTTAAAGAAAC	39	USA300HOU_RS14770;DBGWAS_general_tag=beta-lactam_sensor/signal_transducer_BlaR1
8	n262565	1481	298	589	1183	1441	0	0	No	0.487491	0.999878	-0.0152941	0.694121	TAGATACGATACTTTTCAACCATCAATATAAAAAAA	36	USA300HOU_RS14770;DBGWAS_general_tag=beta-lactam_sensor/signal_transducer_BlaR1
8	n275784	1429	283	589	1146	1441	0	0	No	0.340243	0.999878	0.010631	-0.953905	TTTTCAACCATCAATATAAAAAAAATATTGTGATTC	36
8	n276351	1428	282	589	1146	1441	0	0	No	0.341148	0.999878	0.010557	-0.952181	CAATATTTTTTTTATATTGATGGTTGAAAAGTATC	35
8	n277877	1427	283	589	1144	1441	0	0	No	0.318026	0.999878	0.0109757	-0.998719	ACCATCAATATAAAAAAAATATTGTGATTCGAAA	34
8	n335081	146	146	589	0	1441	0	0	No	NA	NA	NA	NA	AAAGAAACAGTCACTTTATCTAAATGAAAAAGAAAAA	37
8	n338007	1425	244	589	1181	1441	0	0	No	0.749643	0.999878	0.00631265	-0.319222	ATTTAAAGAAACAGTCACTTTATCTAAACGAAAATGAAAA	40	USA300HOU_RS14770;DBGWAS_general_tag=beta-lactam_sensor/signal_transducer_BlaR1
8	n338234	1425	243	589	1182	1441	0	0	Yes	8.0453e-06	0.000540849	0.0870595	-4.48027	ATATCTTAAATATTTAAAGAAACAGTCACTTTATCTAAA	39	USA300HOU_RS14770;DBGWAS_general_tag=beta-lactam_sensor/signal_transducer_BlaR1
8	n340046	149	147	589	2	1441	0	0	No	NA	NA	NA	NA	TTAAGTATTTAAAGAAACAGTCACTTTATCTAAAT	35	USA300HOU_RS14770;DBGWAS_general_tag=beta-lactam_sensor/signal_transducer_BlaR1
8	n341043	1424	243	589	1181	1441	0	0	Yes	1.63334e-05	0.00106236	0.0821734	-4.32343	ATATTTAAAGAAACAGTCACTTTATCTAAACG	32	USA300HOU_RS14770;DBGWAS_general_tag=beta-lactam_sensor/signal_transducer_BlaR1
8	n341044	1	0	589	1	1441	0	0	No	NA	NA	NA	NA	ATATTTAAAGAAACAGTCACTTTATCTAAAT	31	USA300HOU_RS14770;DBGWAS_general_tag=beta-lactam_sensor/signal_transducer_BlaR1
8	n341385	147	146	589	1	1441	0	0	No	NA	NA	NA	NA	TATTTAAAGAAACAGTCACTTTATCTAAATGAAAA	35	USA300HOU_RS14770;DBGWAS_general_tag=beta-lactam_sensor/signal_transducer_BlaR1
8	n348595	1609	432	589	1177	1441	0	0	No	0.520181	0.999878	-0.0112431	0.6428	ATTTAAAACTTAAAATAATAACTAAAACTATCCAAA	36	USA300HOU_RS14770;DBGWAS_general_tag=beta-lactam_sensor/signal_transducer_BlaR1
8	n350021	1531	356	589	1175	1441	0	0	No	0.833112	0.999878	-0.0035925	0.210595	AACTTAAAATAATAACTAAAACTATCCAAATAACT	35	USA300HOU_RS14770;DBGWAS_general_tag=beta-lactam_sensor/signal_transducer_BlaR1
8	n365815	1429	249	589	1180	1441	0	0	No	0.794683	0.999878	0.00510191	-0.260145	TATTTTATTTTTTTCATTTTCGTTTAGATAAAG	33
8	n402170	121	121	589	0	1441	0	0	No	NA	NA	NA	NA	AGAAAAAAATAAAATAAACAAGATACTTTTCAATCATC	38
8	n402403	146	146	589	0	1441	0	0	No	NA	NA	NA	NA	ATAAAATAAACAAGATACTTTTCAATCATCAATATAAAAGA	41
8	n402764	1391	212	589	1179	1441	0	0	Yes	0.00060884	0.0322639	0.0667815	-3.45883	AAATTTTTGAAAGCCTTATTATATCTTAAATAT	33	USA300HOU_RS14770;DBGWAS_general_tag=beta-lactam_sensor/signal_transducer_BlaR1
8	n403178	1391	212	589	1179	1441	0	0	Yes	0.00060884	0.0322639	0.0667815	-3.45883	AATATTTAAGATATAATAAGGCTTTCAAAAA	31	USA300HOU_RS14770;DBGWAS_general_tag=beta-lactam_sensor/signal_transducer_BlaR1
9	n863	1	0	589	1	1441	0	0	No	NA	NA	NA	NA	AGATACATATGAAAAAAGTAATCGGACTGCCACTAGTAAGTACATTAGCTTTAACAGCTTG	61	USA300HOU_RS07940;DBGWAS_general_tag=hypothetical_protein
9	n864	1514	166	589	1348	1441	0	0	No	0.965475	0.999878	0.00140145	-0.043129	GAAAAAAGTAATCGGACTGCTACTAGTAAGTACA	34	USA300HOU_RS07940;DBGWAS_general_tag=hypothetical_protein
9	n8179	1	0	589	1	1441	0	0	No	NA	NA	NA	NA	AAAGTAATCGGACTGCTACTAGTAAGTACACTAGCTTTAACAGCTTGTGGTGAAAAAGAAA	61	USA300HOU_RS07940;DBGWAS_general_tag=hypothetical_protein
9	n8180	1513	166	589	1347	1441	0	0	No	0.901593	0.999878	-0.00356562	0.123681	AAAGTAATCGGACTGCTACTAGTAAGTACATTAGCTTTAACAGCT	45	USA300HOU_RS07940;DBGWAS_general_tag=hypothetical_protein
9	n9812	1	1	589	0	1441	0	0	No	NA	NA	NA	NA	GTTGAAGATAAAAATCCACCTAATAATAGCGTACAAAACAATACAACTAATCAAAACCAAACACAAAACCATAATTCACATAATGCAGGCAATCTTTCTCAATGGGAACAAAATAGAGCTAATGAATTAAAAAGTAATCCAAACTCTAACTATAATCAAAATTGGACTGCAGAAGATCAGGCACAAGCTGAAGCACGGACTAACGGCTCAGGAATGGCTAATGACACCGGTGAATCAATTGAAGAAATGATGAGAAGAAGTGAGCAAGCTAATAAAGAAATGG	283	USA300HOU_RS07940;DBGWAS_general_tag=hypothetical_protein
9	n14854	64	64	589	0	1441	0	0	No	NA	NA	NA	NA	ATAAAAAGTCACAAACACAAAAACACAAAGATAGCAAACCAAAAA	45
9	n15349	3	0	589	3	1441	0	0	No	NA	NA	NA	NA	AAGGAAATATAAACAAAGGAGAGATACATACGAAAAAAGTAATCGGACTGCTACTAGTAAG	61	USA300HOU_RS07940;DBGWAS_general_tag=hypothetical_protein
9	n15405	1511	166	589	1345	1441	0	0	No	0.907701	0.999878	-0.00309766	0.11594	AGATACATATGAAAAAAGTAATCGGACTGCTACTAGTAAG	40	USA300HOU_RS07940;DBGWAS_general_tag=hypothetical_protein
9	n22924	1	1	589	0	1441	0	0	No	NA	NA	NA	NA	TCACTATGGCGAGTATTCTATTACATTTGAACCACTAAGAGTTTATCAATACAAAGAAATATAAATAAAGGAGAAATGTATATGAGGAAAATAATTGGGTTATTACTAGTAAGTACTTTAGCTTTAACTGCTTGTGGCGAAAAAGAAAAAACAAAAAAGGAAGAAAATAAAAAGCCCCAAACACAAAAGCACAAAGATAGCAAACCAAAAAAGCAAAAA	219
9	n29837	1	1	589	0	1441	0	0	No	NA	NA	NA	NA	GATAGCAAACCAAAAAAGCAAAAAGAAAAAACGAAAAAAGTTGAAGATAAAAATCCACCTA	61
9	n44857	1	0	589	1	1441	0	0	No	NA	NA	NA	NA	TAAGTACATTAGCTTTAACAGCTTGTGGTGGTAAAGAAAAACCAAAAAAAGAAGAAAATAAA	62	USA300HOU_RS07940;DBGWAS_general_tag=hypothetical_protein
9	n171848	1433	84	589	1349	1441	0	0	Yes	1.19813e-14	1.66273e-12	0.331621	-7.87005	AGAAGAAAATAAAAAGTCACAAACACAAAATCACAAAGATAGCAAACCAAAAACGCAAC	59
9	n171849	1	1	589	0	1441	0	0	No	NA	NA	NA	NA	AAAGAAGAAAATAAAAAGTCACAAACACAACATCACAAAGATAGCAAACCAAAAACGCAAC	61
9	n180985	1434	85	589	1349	1441	0	0	No	0.919451	0.999878	-0.0054714	0.101253	ATCACAAAGATAGCAAACCAAAAACGCAACAA	32	USA300HOU_RS07940;DBGWAS_general_tag=hypothetical_protein
9	n195541	1506	157	589	1349	1441	0	0	No	0.743201	0.999878	0.0109152	-0.327278	GTTGAAGATAAAAATCCACCTAATAATAGCATACAAAATAATTCAA	46	USA300HOU_RS07940;DBGWAS_general_tag=hypothetical_protein
9	n217920	8	8	589	0	1441	0	0	No	NA	NA	NA	NA	AAAACCAAAAAAAGAAGAAAATAAAAAGTCGCAAACACAAAAGCACAAAGATAGTAAAACAAAAAATCATCAAGAAAAACCGAAAAAAGTTGAAGATAAAA	101
9	n219082	1	1	589	0	1441	0	0	No	NA	NA	NA	NA	GATAGCAAACCAAAAAAGCAAAAAGAAAAACCGAAAAAAGTTGAAGATAAAA	52
9	n227569	2	2	589	0	1441	0	0	No	NA	NA	NA	NA	GCTTGTGGTGAAAAAGAAAAACCAAAAAAAAGAAGAAAATAAAAAGTCACAAAC	54
9	n227625	1504	158	589	1346	1441	0	0	No	0.942911	0.999878	-0.00185352	0.0716067	AAAAAAAGAAGAAAATAAAAAGTCACAAACA	31
9	n227766	1506	158	589	1348	1441	0	0	No	0.913777	0.999878	-0.00328205	0.108448	AAAAAAGAAGAAAATAAAAAGTCACAAACACAA	33
9	n227832	1510	164	589	1346	1441	0	0	No	0.81016	0.999878	-0.00600211	0.240125	AAAGAAAAACCAAAAAAAGAAGAAAATAAAAAGTC	35
9	n227833	2	0	589	2	1441	0	0	No	NA	NA	NA	NA	AGCTTGTGGTGAAAAAGAAAAACCAAAAAAGAAGAAAATAAAAAGTCACAAACA	54
9	n227834	1	0	589	1	1441	0	0	No	NA	NA	NA	NA	CAGCTTGTGGTGAAAAAGAAAAACCAAAAATAGAAGAAAATAAAAAGTCACAAACACAAAA	61
9	n228078	1509	164	589	1345	1441	0	0	No	0.875133	0.999878	-0.00366399	0.157055	GTGGTGAAAAAGAAAAACCAAAAAAAGAAGAAAATAAA	38
9	n228273	1502	156	589	1346	1441	0	0	No	0.962108	0.999878	-0.00118385	0.0474906	AAAACCAAAAAAAGAAGAAAATAAAAAGTCACAAAC	36
9	n230559	1505	157	589	1348	1441	0	0	Yes	6.53862e-07	4.90099e-05	0.138821	-5.00676	AAAGAAGAAAATAAAAAGTCACAAACACAAAA	32	USA300HOU_RS07940;DBGWAS_general_tag=hypothetical_protein
9	n236132	73	73	589	0	1441	0	0	No	NA	NA	NA	NA	AGAAGAAAATAAAAAGTCACAAACACAAAAACACAAAG	38
9	n243548	1513	165	589	1348	1441	0	0	No	0.802074	0.999878	0.00707928	-0.250506	TAGCTTTAACAGCTTGTGGTGAAAAAGAAAAACCAAAAA	39
9	n244151	1506	157	589	1349	1441	0	0	No	0.743201	0.999878	0.0109152	-0.327278	TTAGGTGGATTTTTATCTTCAACTTTTTTCATTTTTTCTTGTTGCGTTTTTGGTTTGCTA	60
9	n285075	9	9	589	0	1441	0	0	No	NA	NA	NA	NA	ATAAAAAGTCACAAACACAAAAACACAAAGGTAGCAAACCAAAAACGCAACAAGAAAAAAT	61
9	n292047	1512	165	589	1347	1441	0	0	No	0.933329	0.999878	0.00215431	-0.0836345	TAAGTACATTAGCTTTAACAGCTTGTGGTGAAAAAGAAA	39	USA300HOU_RS07940;DBGWAS_general_tag=hypothetical_protein
9	n292263	1513	165	589	1348	1441	0	0	No	0.991629	0.999878	0.000292327	-0.0103866	CACCACAAGCTGTTAAAGCTAATGTACTTACTAGT	35	USA300HOU_RS07940;DBGWAS_general_tag=hypothetical_protein
9	n293815	1507	158	589	1349	1441	0	0	No	0.778014	0.999878	0.00909564	-0.281626	GCTATTATTAGGTGGATTTTTATCTTCAACTTTTTTC	37	USA300HOU_RS07940;DBGWAS_general_tag=hypothetical_protein
9	n294535	1512	165	589	1347	1441	0	0	No	0.819083	0.999878	-0.00601697	0.22871	CAGCTTGTGGTGAAAAAGAAAAACCAAAAAA	31
9	n294766	1	1	589	0	1441	0	0	No	NA	NA	NA	NA	CGAAAAAAGTTGAAGATAAAAATCCACCTAA	31	USA300HOU_RS07940;DBGWAS_general_tag=hypothetical_protein
9	n316783	2	2	589	0	1441	0	0	No	NA	NA	NA	NA	CACAAAGATAGCAAACCAAAAAAGCAAAAAGAAAAA	36
9	n318289	1512	165	589	1347	1441	0	0	No	0.900929	0.999878	-0.00338884	0.124547	CAAGCTGTTAAAGCTAATGTACTTACTAGTAG	32	USA300HOU_RS07940;DBGWAS_general_tag=hypothetical_protein
9	n325895	1510	165	589	1345	1441	0	0	No	0.854176	0.999878	-0.00428322	0.183696	AGCTTGTGGTGAAAAAGAAAAACCAAAAAAA	31
9	n326255	1508	163	589	1345	1441	0	0	No	0.875017	0.999878	-0.00352127	0.157194	CTTCTTTTTTTGGTTTTTCTTTTTCACCACAAGC	34
9	n326771	1	1	589	0	1441	0	0	No	NA	NA	NA	NA	CACAAAAACACAAAGATAGCAAACCAAAAAAGCAAAAA	38
9	n326772	63	63	589	0	1441	0	0	No	NA	NA	NA	NA	CACAAAAACACAAAGATAGCAAACCAAAAACGCAACAA	38	USA300HOU_RS07940;DBGWAS_general_tag=hypothetical_protein
9	n329677	1497	148	589	1349	1441	0	0	No	0.75366	0.999878	0.0113542	-0.313562	CACAAAGATAGCAAACCAAAAACGCAACAAGAAAAAAT	38	USA300HOU_RS07940;DBGWAS_general_tag=hypothetical_protein
10	n1001	2	2	589	0	1441	0	0	No	NA	NA	NA	NA	ACTTGTAACTAAAATTAACAATGATAAAAACAATGCAATCGCAGAAATTAATAAACAAACT	61	SAOUHSC_02404;DBGWAS_general_tag=hypothetical_protein~~~USA300HOU_RS11650;DBGWAS_general_tag=methicillin_resistance_protein_FmtB
10	n1299	521	521	589	0	1441	0	0	No	0.0014222	0.0686207	-0.0882511	-3.30299	AACAATGATAAAAATAATGCAATCGCAGAAATTAATAAACAAACT	45	SAOUHSC_02404;DBGWAS_general_tag=hypothetical_protein
10	n12048	1	1	589	0	1441	0	0	No	NA	NA	NA	NA	CAATCGCAGAAATTAATAAACAAACTACAGAACAAGGTGTCACAACTGAAAAAGATAATGG	61	SAOUHSC_02404;DBGWAS_general_tag=hypothetical_protein~~~USA300HOU_RS11650;DBGWAS_general_tag=methicillin_resistance_protein_FmtB
10	n13219	523	523	589	0	1441	0	0	Yes	0.000255451	0.0145255	-0.118073	-3.81354	AATGCAATCGCAGAAATTAATAAACAAACTACAG	34	SAOUHSC_02404;DBGWAS_general_tag=hypothetical_protein
10	n23756	522	522	589	0	1441	0	0	Yes	0.00036051	0.0201318	-0.110062	-3.70084	CAATCGCAGAAATTAATAAACAAACTACAGCACAAGGT	38	SAOUHSC_02404;DBGWAS_general_tag=hypothetical_protein~~~USA300HOU_RS11650;DBGWAS_general_tag=methicillin_resistance_protein_FmtB
10	n75285	1	1	589	0	1441	0	0	No	NA	NA	NA	NA	AGATGAAGTTGCAGCACTTGTAACTAAAATAAACAATGATAAAAATAATGCAATCGCAGAA	61	SAOUHSC_02404;DBGWAS_general_tag=hypothetical_protein~~~USA300HOU_RS11650;DBGWAS_general_tag=methicillin_resistance_protein_FmtB
10	n75286	2025	585	589	1440	1441	0	0	No	NA	NA	NA	NA	AGATGAAGTTGCAGCACTTGTAACTAAAATTAACAATGAT	40	SAOUHSC_02404;DBGWAS_general_tag=hypothetical_protein~~~USA300HOU_RS11650;DBGWAS_general_tag=methicillin_resistance_protein_FmtB
10	n87492	1	0	589	1	1441	0	0	No	NA	NA	NA	NA	ACAAAGTAAAAAAGTTACGCAAGATGAAGTCGCAGCACTTGTAACTAAAATTAACAATGAT	61	SAOUHSC_02404;DBGWAS_general_tag=hypothetical_protein~~~USA300HOU_RS11650;DBGWAS_general_tag=methicillin_resistance_protein_FmtB
10	n87864	2026	586	589	1440	1441	0	0	No	NA	NA	NA	NA	GTTACAGCAGCACAACAAAGTAAAAAAGTTACGCAAGATGAAGT	44	SAOUHSC_02404;DBGWAS_general_tag=hypothetical_protein~~~USA300HOU_RS11650;DBGWAS_general_tag=methicillin_resistance_protein_FmtB
10	n88920	2022	582	589	1440	1441	0	0	No	NA	NA	NA	NA	AACTTTTTTACTTTGTTGTGCTGCTGTAACCTT	33	SAOUHSC_02404;DBGWAS_general_tag=hypothetical_protein~~~USA300HOU_RS11650;DBGWAS_general_tag=methicillin_resistance_protein_FmtB
10	n88921	4	4	589	0	1441	0	0	No	NA	NA	NA	NA	AACTTTTTTACTTTGTTGTGCTGCTGTAACTTTTTCTTGAGCTTTAGTATCTAATTCAGCA	61	SAOUHSC_02404;DBGWAS_general_tag=hypothetical_protein~~~USA300HOU_RS11650;DBGWAS_general_tag=methicillin_resistance_protein_FmtB
10	n158062	1	0	589	1	1441	0	0	No	NA	NA	NA	NA	AAGGTTACAGCAGCACAACAAAGTAAAAAATTTACGCAAGATGAAGTTGCAGCACTTGTAA	61	SAOUHSC_02404;DBGWAS_general_tag=hypothetical_protein~~~USA300HOU_RS11650;DBGWAS_general_tag=methicillin_resistance_protein_FmtB
10	n158180	2025	586	589	1439	1441	0	0	No	NA	NA	NA	NA	ACAAAGTAAAAAAGTTACGCAAGATGAAGTTGCAGCACTTGTAA	44	SAOUHSC_02404;DBGWAS_general_tag=hypothetical_protein~~~USA300HOU_RS11650;DBGWAS_general_tag=methicillin_resistance_protein_FmtB
10	n165285	2026	586	589	1440	1441	0	0	No	NA	NA	NA	NA	TTACGCAAGATGAAGTTGCAGCACTTGTAACTAAAAT	37	SAOUHSC_02404;DBGWAS_general_tag=hypothetical_protein~~~USA300HOU_RS11650;DBGWAS_general_tag=methicillin_resistance_protein_FmtB
10	n196847	2026	585	589	1441	1441	0	0	No	NA	NA	NA	NA	GAAATTAATAAACAAACTACAGCACAAGGTGTCACAACTGAAAAAGATAATGG	53	SAOUHSC_02404;DBGWAS_general_tag=hypothetical_protein~~~USA300HOU_RS11650;DBGWAS_general_tag=methicillin_resistance_protein_FmtB
10	n200639	1504	63	589	1441	1441	0	0	Yes	2.57128e-09	2.42696e-07	0.250876	-6.29514	AATTAACAATGATAAAAATAATGCAATCGCTGAAATTAATAAACAAACTACAGCACAAGGT	61	SAOUHSC_02404;DBGWAS_general_tag=hypothetical_protein~~~USA300HOU_RS11650;DBGWAS_general_tag=methicillin_resistance_protein_FmtB
10	n259259	2023	582	589	1441	1441	0	0	No	NA	NA	NA	NA	AACAGTTAAACCTCAAGCGAAACAAGATATTATC	34	SAOUHSC_02404;DBGWAS_general_tag=hypothetical_protein~~~USA300HOU_RS11650;DBGWAS_general_tag=methicillin_resistance_protein_FmtB
10	n259721	3	3	589	0	1441	0	0	No	NA	NA	NA	NA	AGTGTTAGAACAAGATGTGATTACACCAACGGTTAAACCTCAAGCGAAACAAGATATTATC	61	SAOUHSC_02404;DBGWAS_general_tag=hypothetical_protein~~~USA300HOU_RS11650;DBGWAS_general_tag=methicillin_resistance_protein_FmtB
10	n273761	2024	583	589	1441	1441	0	0	No	NA	NA	NA	NA	ACTTGTAACTAAAATTAACAATGATAAAAATAATGCAATCGC	42	SAOUHSC_02404;DBGWAS_general_tag=hypothetical_protein~~~USA300HOU_RS11650;DBGWAS_general_tag=methicillin_resistance_protein_FmtB
10	n276601	520	520	589	0	1441	0	0	No	0.00241072	0.108128	-0.080026	-3.12172	AATTAACAATGATAAAAATAATGCAATCGCAGAA	34	SAOUHSC_02404;DBGWAS_general_tag=hypothetical_protein~~~USA300HOU_RS11650;DBGWAS_general_tag=methicillin_resistance_protein_FmtB
10	n279627	2026	585	589	1441	1441	0	0	No	NA	NA	NA	NA	GCAGCACTTGTAACTAAAATTAACAATGATAAAAA	35	SAOUHSC_02404;DBGWAS_general_tag=hypothetical_protein~~~USA300HOU_RS11650;DBGWAS_general_tag=methicillin_resistance_protein_FmtB
10	n308004	2027	586	589	1441	1441	0	0	No	NA	NA	NA	NA	ACAAGGTGTCACAACTGAAAAAGATAATGGTATCGCAGTGTTAGAA	46	SAOUHSC_02404;DBGWAS_general_tag=hypothetical_protein~~~USA300HOU_RS11650;DBGWAS_general_tag=methicillin_resistance_protein_FmtB
10	n335709	1	1	589	0	1441	0	0	No	NA	NA	NA	NA	ATATCTTGTTTCGCTTGAGGTTTAACTGTTAGTGTAATCACATCTTGTTCTAACACTGCGA	61	SAOUHSC_02404;DBGWAS_general_tag=hypothetical_protein~~~USA300HOU_RS11650;DBGWAS_general_tag=methicillin_resistance_protein_FmtB
10	n335710	2022	581	589	1441	1441	0	0	No	NA	NA	NA	NA	ATATCTTGTTTCGCTTGAGGTTTAACTGTTGGTGTAATCACATCTT	46	SAOUHSC_02404;DBGWAS_general_tag=hypothetical_protein~~~USA300HOU_RS11650;DBGWAS_general_tag=methicillin_resistance_protein_FmtB
10	n344149	2023	582	589	1441	1441	0	0	No	NA	NA	NA	NA	GAATTAGATACTAAAGCTCAAGAAAAGGTTACAGCAGCACAACAAAGTAAAAAA	54	SAOUHSC_02404;DBGWAS_general_tag=hypothetical_protein~~~USA300HOU_RS11650;DBGWAS_general_tag=methicillin_resistance_protein_FmtB
10	n388400	2	0	589	2	1441	0	0	No	NA	NA	NA	NA	GAGGTTTAACTGTTGGTGTAATCACATCTTTTTCTAACACTGCGATACCATTATCTTTTTC	61	SAOUHSC_02404;DBGWAS_general_tag=hypothetical_protein~~~USA300HOU_RS11650;DBGWAS_general_tag=methicillin_resistance_protein_FmtB
10	n388401	2021	582	589	1439	1441	0	0	No	NA	NA	NA	NA	AGGTTTAACTGTTGGTGTAATCACATCTTGTTCTAACACT	40	SAOUHSC_02404;DBGWAS_general_tag=hypothetical_protein~~~USA300HOU_RS11650;DBGWAS_general_tag=methicillin_resistance_protein_FmtB
10	n389286	2024	585	589	1439	1441	0	0	No	NA	NA	NA	NA	TCGCAGTGTTAGAACAAGATGTGATTACACCAAC	34	SAOUHSC_02404;DBGWAS_general_tag=hypothetical_protein~~~USA300HOU_RS11650;DBGWAS_general_tag=methicillin_resistance_protein_FmtB
10	n389943	2025	586	589	1439	1441	0	0	No	NA	NA	NA	NA	GAAAAAGATAATGGTATCGCAGTGTTAGAACAAGATGTGATTACAC	46	SAOUHSC_02404;DBGWAS_general_tag=hypothetical_protein~~~USA300HOU_RS11650;DBGWAS_general_tag=methicillin_resistance_protein_FmtB
10	n392340	2020	581	589	1439	1441	0	0	No	NA	NA	NA	NA	CAAGATGTGATTACACCAACAGTTAAACCTC	31	SAOUHSC_02404;DBGWAS_general_tag=hypothetical_protein~~~USA300HOU_RS11650;DBGWAS_general_tag=methicillin_resistance_protein_FmtB
11	n1018	2030	589	589	1441	1441	0	0	No	NA	NA	NA	NA	AAGCCGTATTTTTCTATGTATTTTTTCTGGAAAGTAAAATACAAACTTTCACTAAAAGATGCAAGTAAAATAATAAAAACACCTAATACATTAATAGTTGTGTAATCATCTTTACTTATTGAAATAATGGATATTCCTATAAATGCGACGAGTGAACTTAACCAATTCCATTTTGAAAAATGCTCTTTTAAAAATATATAAGCTAAAGCACTAGAAAAAATAGGCGTTGTAGAGA	235	USA300HOU_RS00560;DBGWAS_general_tag=EamA_family_transporter~~~SAOUHSC_00062;DBGWAS_general_tag=hypothetical_protein
11	n3494	2028	587	589	1441	1441	0	0	No	NA	NA	NA	NA	CTCCCTTTTAAAATTGGATAGGTAAATCCATTCAAAATTGGTTG	44	TCH1516intergenic_123753-123865~~~NCTC8325intergenic_69073-69185
11	n3587	2025	584	589	1441	1441	0	0	No	NA	NA	NA	NA	TGATTTAAAATGAGTACAACCAATTTTGAATGGATTTACCTATCCA	46	TCH1516intergenic_123753-123865~~~NCTC8325intergenic_69073-69185
11	n3595	3	3	589	0	1441	0	0	No	NA	NA	NA	NA	CTATATTAAAAAATATGATTTAAAATGAGTGCAACCAATTTTGAATGGATTTACCTATCCA	61	TCH1516intergenic_123753-123865~~~NCTC8325intergenic_69073-69185
11	n30123	1448	7	589	1441	1441	0	0	Yes	4.96228e-224	1.39108e-219	0.995166	-345.766	TGATGATATTAATGAATAAACTTCAAGACACTACTTTTCTATCATATTTATTTAC	55	USA300HOU_RS00560;DBGWAS_general_tag=EamA_family_transporter~~~SAOUHSC_00062;DBGWAS_general_tag=hypothetical_protein
11	n30447	582	582	589	0	1441	0	0	Yes	4.96228e-224	1.39108e-219	-0.995166	-345.766	GTAAATAAATATGATAGAAAAGTAGTGTCTCGAAGTTTATTCATTAATATCATCACTCCTT	61	USA300HOU_RS00560;DBGWAS_general_tag=EamA_family_transporter~~~SAOUHSC_00062;DBGWAS_general_tag=hypothetical_protein
11	n32034	2030	589	589	1441	1441	0	0	No	NA	NA	NA	NA	CCGACAATGATTCTGCACTAAAATCATTTAACGCAATCTTTATCATTGGAAATGCAGATCCCCACAATATGATAGTAAATAAATATGATAGAAAAGTAGTGTCT	104	USA300HOU_RS00560;DBGWAS_general_tag=EamA_family_transporter~~~SAOUHSC_00062;DBGWAS_general_tag=hypothetical_protein
11	n116094	1	1	589	0	1441	0	0	No	NA	NA	NA	NA	AGAATTATTGTTGCTAAAATTAAACGAAATTCCGACAATGATTCTGCACTAAAATCATTTA	61	USA300HOU_RS00560;DBGWAS_general_tag=EamA_family_transporter~~~SAOUHSC_00062;DBGWAS_general_tag=hypothetical_protein
11	n116095	2028	587	589	1441	1441	0	0	No	NA	NA	NA	NA	AGAATTATTGTTGCTAAAATTAAACGAAATGCCGACAATGATTCTGCACTAAAA	54	USA300HOU_RS00560;DBGWAS_general_tag=EamA_family_transporter~~~SAOUHSC_00062;DBGWAS_general_tag=hypothetical_protein
11	n116117	1	1	589	0	1441	0	0	No	NA	NA	NA	NA	CGGCAAGAGAATTATTGTTGCTAAAATTAAGCGAAATGCCGACAATGATTCTGCACTAAAA	61	USA300HOU_RS00560;DBGWAS_general_tag=EamA_family_transporter~~~SAOUHSC_00062;DBGWAS_general_tag=hypothetical_protein
11	n118592	2029	588	589	1441	1441	0	0	No	NA	NA	NA	NA	TAAATGATTTTAGTGCAGAATCATTGTCGGCATTTCG	37	USA300HOU_RS00560;DBGWAS_general_tag=EamA_family_transporter~~~SAOUHSC_00062;DBGWAS_general_tag=hypothetical_protein
11	n133381	3	0	589	3	1441	0	0	No	NA	NA	NA	NA	TAAATTTTGGTGAAGCTTTGATTAGTGCAGTTATATCTGGAATTCTAGTCTCTACAACGCC	61	USA300HOU_RS00560;DBGWAS_general_tag=EamA_family_transporter~~~SAOUHSC_00062;DBGWAS_general_tag=hypothetical_protein
11	n151167	1446	8	589	1438	1441	0	0	Yes	7.53416e-56	2.22321e-53	0.678915	-27.9923	GAATTCCAGATATACCTGCACTAATCAAAGCTTCACCAAAATTTA	45	USA300HOU_RS00560;DBGWAS_general_tag=EamA_family_transporter~~~SAOUHSC_00062;DBGWAS_general_tag=hypothetical_protein
11	n151992	2029	588	589	1441	1441	0	0	No	NA	NA	NA	NA	CGGCAAGAGAATTATTGTTGCTAAAATTAAACGAAAT	37	USA300HOU_RS00560;DBGWAS_general_tag=EamA_family_transporter~~~SAOUHSC_00062;DBGWAS_general_tag=hypothetical_protein
11	n153760	2026	588	589	1438	1441	0	0	No	NA	NA	NA	NA	GGCGTTGTAGAGACTAGAATTCCAGATATACCTGCACTAATCAA	44	USA300HOU_RS00560;DBGWAS_general_tag=EamA_family_transporter~~~SAOUHSC_00062;DBGWAS_general_tag=hypothetical_protein
11	n154054	581	581	589	0	1441	0	0	Yes	2.08677e-165	1.59263e-161	-0.994478	-323.156	ATATATCACACAGCTTTAAATTTTGGTGAAACTTTGATTAGTGCAGGTATATCTGGAATTC	61	USA300HOU_RS00560;DBGWAS_general_tag=EamA_family_transporter~~~SAOUHSC_00062;DBGWAS_general_tag=hypothetical_protein
11	n154798	2029	588	589	1441	1441	0	0	No	NA	NA	NA	NA	TATATCTGGAATTCTAGTCTCTACAACGCCTATTTTTTCTAGTGCTT	47	USA300HOU_RS00560;DBGWAS_general_tag=EamA_family_transporter~~~SAOUHSC_00062;DBGWAS_general_tag=hypothetical_protein
11	n155601	1	1	589	0	1441	0	0	No	NA	NA	NA	NA	AAGCACTAGAAAAAATAGGCGTTGTAGAGATTAGAATTCCAGATATACCTGCACTAATCAA	61	USA300HOU_RS00560;DBGWAS_general_tag=EamA_family_transporter~~~SAOUHSC_00062;DBGWAS_general_tag=hypothetical_protein
11	n156335	2027	589	589	1438	1441	0	0	No	NA	NA	NA	NA	TAGAATTCCAGATATACCTGCACTAATCAAAG	32	USA300HOU_RS00560;DBGWAS_general_tag=EamA_family_transporter~~~SAOUHSC_00062;DBGWAS_general_tag=hypothetical_protein
11	n171520	1	1	589	0	1441	0	0	No	NA	NA	NA	NA	AAATCCACAAAATCCTAAAATAAAAATAACGGGGATATCTCTTAGTTCAGGGGTAGGCAAT	61	USA300HOU_RS00560;DBGWAS_general_tag=EamA_family_transporter~~~SAOUHSC_00062;DBGWAS_general_tag=hypothetical_protein
11	n184522	2026	586	589	1440	1441	0	0	No	NA	NA	NA	NA	ATTAAAAAATATGATTTAAAATGAGTACAACCAATTTTGA	40	TCH1516intergenic_123753-123865~~~NCTC8325intergenic_69073-69185
11	n184784	1	0	589	1	1441	0	0	No	NA	NA	NA	NA	CTTTAATTATGTGTTTCTATATTAAAAAATTTGATTTAAAATGAGTACAACCAATTTTGAA	61	TCH1516intergenic_123753-123865~~~NCTC8325intergenic_69073-69185
11	n193623	2024	584	589	1440	1441	0	0	No	NA	NA	NA	NA	ATGATTTAAAATGAGTACAACCAATTTTGAA	31	TCH1516intergenic_123753-123865~~~NCTC8325intergenic_69073-69185
11	n200745	2030	589	589	1441	1441	0	0	No	NA	NA	NA	NA	TTAATTTTAGCAACAATAATTCTCTTGCCGTTCGTAATTATAAAGAAATTGCCTACCCCTGAACTAAGAGATATCCC	77	USA300HOU_RS00560;DBGWAS_general_tag=EamA_family_transporter~~~SAOUHSC_00062;DBGWAS_general_tag=hypothetical_protein
11	n228744	2030	589	589	1441	1441	0	0	No	NA	NA	NA	NA	TTCACCAAAATTTAAAGCTGTGTGATATATCACAAATCCACAAAATCCTAAAATAAAAATAAC	63	USA300HOU_RS00560;DBGWAS_general_tag=EamA_family_transporter~~~SAOUHSC_00062;DBGWAS_general_tag=hypothetical_protein
11	n256277	2029	588	589	1441	1441	0	0	No	NA	NA	NA	NA	CCAGAAAAAATACATAGAAAAATACGGCTTCATCGCTTTCACACTATATACAATAATGGCA	61	USA300HOU_RS00560;DBGWAS_general_tag=EamA_family_transporter~~~SAOUHSC_00062;DBGWAS_general_tag=hypothetical_protein
11	n256278	1	1	589	0	1441	0	0	No	NA	NA	NA	NA	CCAGAAAAAATACATAGAAAAATACGGCTTTATCGCTTTCACACTATATACAATAATGGCA	61	USA300HOU_RS00560;DBGWAS_general_tag=EamA_family_transporter~~~SAOUHSC_00062;DBGWAS_general_tag=hypothetical_protein
11	n276296	1	1	589	0	1441	0	0	No	NA	NA	NA	NA	ATTTTAAATCATATTTTTTAATATAGAAACGCATAATTAAAGGAGTGATGATATTAATGAA	61	TCH1516intergenic_123753-123865~~~NCTC8325intergenic_69073-69185
11	n299327	1	1	589	0	1441	0	0	No	NA	NA	NA	NA	TATCATCACTCCTTTAATTATGTGTTTCTACATTAAAAAATATGATTTAAAATGAGTACAA	61	TCH1516intergenic_123753-123865~~~NCTC8325intergenic_69073-69185
11	n300211	2025	585	589	1440	1441	0	0	No	NA	NA	NA	NA	TATATTAAAAAATATGATTTAAAATGAGTACAA	33	TCH1516intergenic_123753-123865~~~NCTC8325intergenic_69073-69185
11	n312721	2029	588	589	1441	1441	0	0	No	NA	NA	NA	NA	AAATCCACAAAATCCTAAAATAAAAATAACAGGGATATCTCTTAGTTCAGGGGTAGGCAAT	61	USA300HOU_RS00560;DBGWAS_general_tag=EamA_family_transporter~~~SAOUHSC_00062;DBGWAS_general_tag=hypothetical_protein
11	n348946	1	0	589	1	1441	0	0	No	NA	NA	NA	NA	TTTTTAATATAGAAACACATAATTAAAGGAATGATGATATTAATGAATAAACTTCAAGACA	61	TCH1516intergenic_123753-123865~~~NCTC8325intergenic_69073-69185
11	n348947	2028	588	589	1440	1441	0	0	No	NA	NA	NA	NA	AAACACATAATTAAAGGAGTGATGATATTAATGAA	35	TCH1516intergenic_123753-123865~~~NCTC8325intergenic_69073-69185
11	n349758	2029	589	589	1440	1441	0	0	No	NA	NA	NA	NA	CATAATTAAAGGAGTGATGATATTAATGAATAAACTTC	38
11	n350231	1	1	589	0	1441	0	0	No	NA	NA	NA	NA	TAATATCATCACTCCTTTAATTATGTGTTTATATATTAAAAAATATGATTTAAAATGAGTA	61	TCH1516intergenic_123753-123865~~~NCTC8325intergenic_69073-69185
11	n350232	2027	587	589	1440	1441	0	0	No	NA	NA	NA	NA	TAATATCATCACTCCTTTAATTATGTGTTTCTA	33	TCH1516intergenic_123753-123865~~~NCTC8325intergenic_69073-69185
11	n350864	1447	7	589	1440	1441	0	0	Yes	6.24721e-165	1.59263e-161	0.98458	-163.276	AAGGAGTGATGATATTAATGAATAAACTTCAAGACA	36
11	n359781	2026	586	589	1440	1441	0	0	No	NA	NA	NA	NA	TTTTTAATATAGAAACACATAATTAAAGGAGTGATGATA	39	TCH1516intergenic_123753-123865~~~NCTC8325intergenic_69073-69185
11	n359951	2026	586	589	1440	1441	0	0	No	NA	NA	NA	NA	CTTTAATTATGTGTTTCTATATTAAAAAATATGATTTAAAAT	42	TCH1516intergenic_123753-123865~~~NCTC8325intergenic_69073-69185
11	n361453	2027	586	589	1441	1441	0	0	No	NA	NA	NA	NA	ATTTTTTAATATAGAAACACATAATTAAAGGA	32	TCH1516intergenic_123753-123865~~~NCTC8325intergenic_69073-69185
11	n367941	1449	8	589	1441	1441	0	0	Yes	2.08677e-165	1.59263e-161	0.994478	-323.156	CTGCACTAATCAAAGCTTCACCAAAATTTAAAGCTGTGTGATATAT	46	USA300HOU_RS00560;DBGWAS_general_tag=EamA_family_transporter~~~SAOUHSC_00062;DBGWAS_general_tag=hypothetical_protein
11	n406644	2027	587	589	1440	1441	0	0	No	NA	NA	NA	NA	ACTCATTTTAAATCATATTTTTTAATATAGAAAC	34	TCH1516intergenic_123753-123865~~~NCTC8325intergenic_69073-69185
11	n407038	2030	589	589	1441	1441	0	0	No	NA	NA	NA	NA	ATCGCTTTCACACTATATACAATAATGGCAAG	32	USA300HOU_RS00560;DBGWAS_general_tag=EamA_family_transporter~~~SAOUHSC_00062;DBGWAS_general_tag=hypothetical_protein
11	n407687	2024	584	589	1440	1441	0	0	No	NA	NA	NA	NA	CTATATTAAAAAATATGATTTAAAATGAGTA	31	TCH1516intergenic_123753-123865~~~NCTC8325intergenic_69073-69185
12	n1030	10	10	589	0	1441	0	0	No	NA	NA	NA	NA	TAGTTTTACTTATGATACGCCTCTGCTTATTAGGTAATGATGTGGTTTTCAATTAACGTCTTTTTGTTATAAGTCTTAAAGAAATATTAAACAAGCAAAATCATTTTCCCTAACTGAAACGAAAGAACGACAAATTCCATACTATTACATTGGAATTTGTCGCTCTTTTATTTATTAGAGGTATATTATTTTTACAAACTTCTAAATTAATTGTTACAACAATTGTTATTATCCTGCTGTTCTTTTTCATTCTTCTCTTTTTTTTCTTCAATTTCTACTGAACAACAAGATTGTTCCTGAGGTTTTAATTTTTTTAATACGTCTTTGATTCCCATTATCTCACCTCCTTTAAATAACGATGTTCACCATCAAACCTGTAGAAATAGCTACAACTAAAAT…	2305
12	n2325	51	51	589	0	1441	0	0	No	NA	NA	NA	NA	GAAGCGTATCACAAATAAAACTAAAAAATAAGTTGTATATAACTTATTTTGAAATTGGTTAAGTATATAGTATCTCCAATAAAATGTAGTTAACTTACGATAATGCTGAACTATAGCTTTGTAAACTAAAATGTAAATAATTACAATCAAATTGCAACAATATAGTTCAAGAATGCTACAATTTGAGGACAGATTGATAGCATTAATCCCTTTAAAATGAAGCTAGGAGATAACTTACATTATGATTAGTAAACAAATAAAGGATTTACGAAAGCAACATAATTATACTCAAGAAGAGCTAGCTGAAAAATTAAATACTTCAAGACAAACAATTTCTAAATGGGAACAAGGTATTTCAGAACCAGACTTAATTATGCTTATGCAATTGTCACAATTATT…	2438	TCH1516intergenic_57554-58073
12	n12347	20	20	589	0	1441	0	0	No	NA	NA	NA	NA	TCTGCTTATCAGTTGATGATGAGGTTTTTAAAAATTCAACATTGCACTTATTAACCTTAAATTGATATCATTTTCAACTAATTTCTTCATATGTCGATAATTAGTAAATTGTTTAATTTTAATCATATATTGTTTTAATAAAATTTCTTCTCTAGGTAATAAAGATTTTTCATTATCCGATAACTTGTTAAACTCCTCACTTAATATTCTTGTTAATATATTTTTTT	227
12	n20768	1376	55	589	1321	1441	0	0	No	0.0408618	0.999878	-0.0640195	2.06136	CTTATTAATTGAAATTATATAATTAAAAACCGCATCATTAACCGATA	47	TCH1516intergenic_88627-89054
12	n21690	1	1	589	0	1441	0	0	No	NA	NA	NA	NA	CTCTGCTTATCAGTTGATGATGCGGTTTTTAAGTAATAAGTTCATTAAAAAAATAATTGGCTTATTATGAACAACTAACAGAATTGATTCCAATTATACTACTTCACAATTTATATAGTAATCTTCAATAGATATGATTTTTAATTTTAAATTATTAACTACAATCACCTCATAATAATGGCTTTCTTCGCCTGTTAAATTACCTACATAGAAAGCTGGTGTTCCTTTTTTTACTTTTACCCGTAATTTGTAACCTTCTTCTCTTGATTCGTACCCTTTTATTAATGAAGTGTGTAAAATTCCAAGTTCAAACAAATCTACTCCATTTAAGTTTTTAGCATTTTTCTCCATTAATTTGTATATCCGAGGACTAACCGTTCTATAAGTAGTTATATCCTC…	791	USA300HOU_RS00215;DBGWAS_general_tag=hypothetical_protein
12	n24792	4	0	589	4	1441	0	0	No	NA	NA	NA	NA	AATATTACTGATTTTATTTTTAAAGAAAAAATGCTCCCACTCTTCTTTAATTCTTTCTTTG	61	USA300HOU_RS00245;DBGWAS_general_tag=HNH_endonuclease
12	n29470	1329	8	589	1321	1441	0	0	No	0.621098	0.999878	-0.023708	0.494225	AAAATAAAGACAAACAAATACCATTTGAAGGATCTAGTCTAATAAACTCATTTTCATGCCAAGGAATAATATGTGTAACGACTAAAAAGTCTTTAGTTTTAATCCCGGTAATTGCACATCTATAACTATAATTTTGTTTAATCCTTTTTGAAAACTCAAAATGAGCACTTCCCTTAGCTTGAACAAA	187	USA300HOU_RS00245;DBGWAS_general_tag=HNH_endonuclease
12	n33998	15	0	589	15	1441	0	0	No	NA	NA	NA	NA	TTAACCGATACGCAGAAGCATATCATAAATGATGCGGTTTT	41
12	n40222	49	49	589	0	1441	0	0	No	NA	NA	NA	NA	TATAATTAAAAACCGCATCATTAACCGATAAGCAGAGGCGTATCATAAGTAAAACT	56	TCH1516intergenic_88627-89054
12	n40223	1	1	589	0	1441	0	0	No	NA	NA	NA	NA	TTTTTCAAAAACCGCATCATTAACTGATAATCAGAAGCGTATCACAAATAAAACTAAAAAA	61	TCH1516intergenic_57554-58073
12	n40224	2	1	589	1	1441	0	0	No	NA	NA	NA	NA	AAACCGCATCATTAACTGATAAGCAGAAGCATATCATAAATGATGCGGTTTT	52	TCH1516intergenic_57554-58073
12	n40225	1298	7	589	1291	1441	0	0	No	0.00622437	0.2475	0.0443235	-2.74562	AAACCGCATCATTAACTGATAAGCAGAAGCGTA	33	TCH1516intergenic_57554-58073
12	n40226	114	23	589	91	1441	0	0	No	NA	NA	NA	NA	CAAAAACCGCATCATTAACTGATAAGCAGAGGCGTATCATAAGTAA	46	TCH1516intergenic_57554-58073
12	n40227	2	0	589	2	1441	0	0	No	NA	NA	NA	NA	TTTTCAAAAACCGCATCATTAACTGATAAGTGGAAATAGAAAGTAATTATATTAATAA	58	TCH1516intergenic_57554-58073~~~USA300HOU_RS00245;DBGWAS_general_tag=HNH_endonuclease
12	n41943	1296	5	589	1291	1441	0	0	No	0.00418324	0.175552	0.0479212	-2.87491	TTGTGATACGCTTCTGCTTATCAGTTAATGATGCGG	36	TCH1516intergenic_57554-58073
12	n42867	18	3	589	15	1441	0	0	No	NA	NA	NA	NA	CGCATCATTAACCGATACGCAGAAGCATATCATAAAT	37
12	n45750	2	2	589	0	1441	0	0	No	NA	NA	NA	NA	CCGCATCATTAACTGATAAGCAGAAGCGTACCACAAATAA	40	TCH1516intergenic_57554-58073
12	n48619	1324	7	589	1317	1441	0	0	No	0.897978	0.999878	-0.00424031	0.128146	TTTGGAGCTGGGAAAATAGAAAAAATTGAGCGAAAAAATAATG	43
12	n50962	1	1	589	0	1441	0	0	No	NA	NA	NA	NA	AAATAGAAAAAATTGAGCGAAAAAATAATGCAGCAACCGCTTACATTTCAAAACCCTTACT	61	USA300HOU_RS00245;DBGWAS_general_tag=HNH_endonuclease
12	n50963	1323	6	589	1317	1441	0	0	Yes	1.57119e-06	0.000112074	0.146361	-4.81332	AAATAGAAAAAATTGAGCGAAAAAATAATGT	31	USA300HOU_RS00245;DBGWAS_general_tag=HNH_endonuclease
12	n55282	1321	6	589	1315	1441	0	0	Yes	0.000164251	0.0095926	0.097749	-3.77401	AATAGAAAAAATTGAGCGAAAAAATAATGTAGCAAC	36	USA300HOU_RS00245;DBGWAS_general_tag=HNH_endonuclease
12	n55283	2	0	589	2	1441	0	0	No	NA	NA	NA	NA	AATAGAAAAAATTGAGCGAAAAAATAATGTGGCAACCGCTTACATTTCAAAACCCTTACTT	61	USA300HOU_RS00245;DBGWAS_general_tag=HNH_endonuclease
12	n56306	1	0	589	1	1441	0	0	No	NA	NA	NA	NA	CTCAATTTTTTCTATTTTCCCAGCTCCAAATAAATAAAATTGTTGAGCAATTTGAGATAAA	61	USA300HOU_RS00245;DBGWAS_general_tag=HNH_endonuclease
12	n56307	1323	7	589	1316	1441	0	0	No	0.934031	0.999878	-0.00243321	0.0826856	CTCAATTTTTTCTATTTTCCCAGCTCCAAAGAAATAAAATTGTTGAGCA	49	USA300HOU_RS00245;DBGWAS_general_tag=HNH_endonuclease
12	n62125	1324	7	589	1317	1441	0	0	No	0.897978	0.999878	-0.00424031	0.128146	TTGAGATAAATTAGTTGGCCGTCTAAAAATGAACAAATCGCCTTCTCTGATCTTATTATTCTGTTTTACATCCCAAGTAAACTCCTTTTCAG	92	USA300HOU_RS00245;DBGWAS_general_tag=HNH_endonuclease
12	n66052	1416	31	589	1385	1441	0	0	No	0.0807399	0.999878	0.0618916	-1.75391	CTACAGAAATTTATAGAAGAACAACAAAACTCAAACGCTATATCATATAATAAGTTCTTAGAAGCTTACAAAGTAGA	77	TCH1516intergenic_57554-58073
12	n67563	1328	7	589	1321	1441	0	0	No	0.93151	0.999878	-0.00456902	0.0860999	AGTGGAAATAGAAAGTAATTATATTAATAATGATATTTCGCTAACTTTTAAACAAATGGCTGATATGGCAACTCGAATAAAGAAAAAT	88	USA300HOU_RS00245;DBGWAS_general_tag=HNH_endonuclease
12	n67808	1	0	589	1	1441	0	0	No	NA	NA	NA	NA	CAAATGCTTCATGATTCCCTACGTAGTAAACATTTTTCTTTATTCGAGTTGCCATATCAGC	61	USA300HOU_RS00245;DBGWAS_general_tag=HNH_endonuclease
12	n87540	1416	31	589	1385	1441	0	0	No	0.0807399	0.999878	0.0618916	-1.75391	AAAGTATCAAGTTAATTAATTTAATATGCTTAATAAGTTCTACCTTGACCTTTTTCTCTAGCTTCTGTTCGATCTCTTATGTACTCAGTACATACTGGATTTTCTGTTAATTCATCAACTGTATTAGTTTAATCAGAAGACGT	143	TCH1516intergenic_57554-58073
12	n103701	1415	31	589	1384	1441	0	0	No	0.23262	0.999878	0.0373707	-1.20062	TAATAAGTTCTTAGAAGCTTACAAAGTAGACACGTCTTCTGATTAAACTAATACAGTTGAT	61	TCH1516intergenic_57554-58073
12	n114652	1	0	589	1	1441	0	0	No	NA	NA	NA	NA	TTACAAAAAATGATTTTTTAAAACTACTAATTTTGAGTAGAAATGTAGTGGAAATAGAAAG	61	USA300HOU_RS00245;DBGWAS_general_tag=HNH_endonuclease
12	n123777	2	0	589	2	1441	0	0	No	NA	NA	NA	NA	GTTTTACATCCCAAGTAAACTCCTTTTCAGCATCATCACTATTTGTATAGTTGGTATCTAA	61	USA300HOU_RS00245;DBGWAS_general_tag=HNH_endonuclease
12	n123778	1322	7	589	1315	1441	0	0	No	0.64494	0.999878	-0.0127322	0.460564	GTTTTACATCCCAAGTAAACTCCTTTTCAGTATCATCACTATTTGTAT	48	USA300HOU_RS00245;DBGWAS_general_tag=HNH_endonuclease
12	n144446	11	11	589	0	1441	0	0	No	NA	NA	NA	NA	TAAAAACCTCATCATCAACTGATAAGCAGAGGCGTATCA	39
12	n144462	1321	7	589	1314	1441	0	0	No	0.99383	0.999878	-0.000208192	0.00769002	AATATTACTGATTTTATTTTTAAAGAAAAACTGCTCCCACTCTTCTTTAATTCTTTCTTTG	61	USA300HOU_RS00245;DBGWAS_general_tag=HNH_endonuclease
12	n145826	1	0	589	1	1441	0	0	No	NA	NA	NA	NA	AAAATGAGCACTTCCCTTAGCTTGAACAAACGCTTCATGATTCCCTACGTAGTAAATATTT	61	USA300HOU_RS00245;DBGWAS_general_tag=HNH_endonuclease
12	n145827	1328	8	589	1320	1441	0	0	No	0.673153	0.999878	-0.0163733	0.421675	AAAATGAGCACTTCCCTTAGCTTGAACAAATGCTTCATGATTCCCTACGTAGTAAA	56	USA300HOU_RS00245;DBGWAS_general_tag=HNH_endonuclease
12	n151937	1	0	589	1	1441	0	0	No	NA	NA	NA	NA	ATCAACTGTATTAGTTTAATCAGAAGACGTTTCTACTTTGTAAGCTTCTAAGAACTTATTA	61	TCH1516intergenic_57554-58073
12	n171596	1328	8	589	1320	1441	0	0	No	0.462948	0.999878	-0.0291878	0.733773	GCTGATATGGCAACTCGAATAAAGAAAAATATTTACTACGTAGGGAATCATGAAGC	56	USA300HOU_RS00245;DBGWAS_general_tag=HNH_endonuclease
12	n173942	1327	8	589	1319	1441	0	0	No	0.516817	0.999878	-0.0220962	0.648	AAATATTTACTACGTAGGGAATCATGAAGCATTTG	35	USA300HOU_RS00245;DBGWAS_general_tag=HNH_endonuclease
12	n210138	1	0	589	1	1441	0	0	No	NA	NA	NA	NA	TGCTCAACAATTTTATTTCTTTGGAGCTGGAAAATAGAAAAATTGAGCGAAAAAATAATGTAGCAAC	67	USA300HOU_RS00245;DBGWAS_general_tag=HNH_endonuclease
12	n222753	1324	7	589	1317	1441	0	0	No	0.897978	0.999878	-0.00424031	0.128146	AAATAAAATTGTTGAGCAATTTGAGATAAATTAGTTGGCCGTCTAAAAAT	50	USA300HOU_RS00245;DBGWAS_general_tag=HNH_endonuclease
12	n222797	1	0	589	1	1441	0	0	No	NA	NA	NA	NA	GCTCCAAAGAAATAAAATTGTTGAGCAATTGAGATAAATTAGTTGGCCGTCTAAAAAT	58	USA300HOU_RS00245;DBGWAS_general_tag=HNH_endonuclease
12	n227681	1	0	589	1	1441	0	0	No	NA	NA	NA	NA	TGAGCGAAAAAATAATGTAGCAACCGCTTATATTTCAAAACCCTTACTTTTTGTGGATCGT	61	USA300HOU_RS00245;DBGWAS_general_tag=HNH_endonuclease
12	n231528	6	6	589	0	1441	0	0	No	NA	NA	NA	NA	AACTGATAAGCAGAAGCGTACCACAAATAAAACTAAAAAAT	41
12	n233251	1324	7	589	1317	1441	0	0	No	0.838995	0.999878	0.00646885	-0.20309	TTTTTAAAACTACTAAGTTTGAGTAGAAATGTAGTGGAAATAGAAAG	47	USA300HOU_RS00245;DBGWAS_general_tag=HNH_endonuclease
12	n234413	1325	7	589	1318	1441	0	0	No	0.860158	0.999878	0.00648019	-0.176084	TTATTAATATAATTACTTTCTATTTCCACTACATTTCTACTCAAA	45	USA300HOU_RS00245;DBGWAS_general_tag=HNH_endonuclease
12	n235247	4	4	589	0	1441	0	0	No	NA	NA	NA	NA	CCGCATCATCAACTGATAAGCAGAAGCGTACCACAAATAA	40
12	n236136	8	8	589	0	1441	0	0	No	NA	NA	NA	NA	AGAAGCGTACCACAAATAAAACTAAAAAATA	31
12	n238399	2	1	589	1	1441	0	0	No	NA	NA	NA	NA	AGAAGCATATCATAAATGATGCGGTTTTTTTAGCCGCTTCATGAAGAAAATTAGAGTTAGCACAATACTTTTGTTAAAATATAAAGA	87
12	n241590	1	0	589	1	1441	0	0	No	NA	NA	NA	NA	TAGCACAATACTTTTGTTAAAATATAAAGACAAATATTTGGAAATATAAAAATAATTAATA	61
12	n241591	1	1	589	0	1441	0	0	No	NA	NA	NA	NA	TAGCACAATACTTTTGTTAAAATATAAAGATAAATATTTGGAAATATAAAAATAATTAATA	61
12	n246856	15	15	589	0	1441	0	0	No	NA	NA	NA	NA	AAAAAACCGCATCATCAACTGATAAGCAGAG	31
12	n246857	1569	205	589	1364	1441	0	0	No	0.261622	0.999878	-0.0164693	1.12278	AAAAAACCGCATCATTTATGATATGCTTCTCCTC	34
12	n246858	3	0	589	3	1441	0	0	No	NA	NA	NA	NA	AAAAAACCGCATCATTTATGATATGCTTCTT	31
12	n246859	17	1	589	16	1441	0	0	No	NA	NA	NA	NA	AAAAAACCGCATCATTTATGATATGCTTCTGC	32
12	n247025	16	16	589	0	1441	0	0	No	NA	NA	NA	NA	AAAAACCGCATCATCAACTGATAAGCAGAGGCGTATCA	38
12	n247026	1299	7	589	1292	1441	0	0	No	0.00283165	0.124225	0.049296	-2.9982	CAAAAACCGCATCATTAACTGATAAGCAGAAGC	33	TCH1516intergenic_57554-58073
12	n249349	1606	223	589	1383	1441	0	0	No	0.787315	0.999878	0.00521723	-0.269641	TATCATAAATGATGCGGTTTTTTCAGCCGCTTCATAAAGGGATTTTGAA	49	TCH1516intergenic_34191-34512
12	n251702	1415	31	589	1384	1441	0	0	No	0.113952	0.999878	0.0502974	-1.58701	ATCAGTTAATGATGCGGTTTTTGAAAAATAACTACAGAAATTTATAGAAGAACAACAAAAC	61	TCH1516intergenic_57554-58073
12	n251703	1	0	589	1	1441	0	0	No	NA	NA	NA	NA	ATCAGTTAATGATGCGGTTTTTGAAAAATAGCTACAGAAATTTATAGAAGAACAACAAAAC	61	TCH1516intergenic_57554-58073
12	n251946	1583	204	589	1379	1441	0	0	No	0.973987	0.999878	0.000603696	-0.0325798	AGAAGCATATCATAAATGATGCGGTTTTTTCAGCCGC	37
12	n254410	1416	31	589	1385	1441	0	0	No	0.0807399	0.999878	0.0618916	-1.75391	TATTTTTCAAAAACCGCATCATTAACTGATAA	32	TCH1516intergenic_57554-58073
12	n255365	1415	30	589	1385	1441	0	0	Yes	5.37722e-20	9.08071e-18	0.290512	-9.35189	CTTATCAGTTAATGATGCGGTTTTTGAAAAA	31	TCH1516intergenic_57554-58073
12	n255444	1413	30	589	1383	1441	0	0	Yes	1.12578e-15	1.661e-13	0.2198	-8.10907	TCTGCTTATCAGTTAATGATGCGGTTTTTGAAAA	34	TCH1516intergenic_57554-58073
12	n259934	1325	7	589	1318	1441	0	0	No	0.860158	0.999878	0.00648019	-0.176084	TTAAAAATAAAATCAGTAATATTACAAAAAATGATTTTTTAAAACTACTAA	51	USA300HOU_RS00245;DBGWAS_general_tag=HNH_endonuclease
12	n262107	1324	7	589	1317	1441	0	0	No	0.838995	0.999878	0.00646885	-0.20309	ATTTCTACTCAAACTTAGTAGTTTTAAAAAATCATTTTTTGTAA	44	USA300HOU_RS00245;DBGWAS_general_tag=HNH_endonuclease
12	n277595	1	0	589	1	1441	0	0	No	NA	NA	NA	NA	TATTATCTTTTAAAACACGATCCACAAAAATTAAGGGTTTTGAAATGTAAGCGGTTGCTAC	61	USA300HOU_RS00245;DBGWAS_general_tag=HNH_endonuclease
12	n283619	1345	54	589	1291	1441	0	0	No	0.314101	0.999878	0.0155019	-1.02049	AACTGATAAGCAGAAGCGTATCACAAATAAAACTAAAAA	39	TCH1516intergenic_57554-58073
12	n283620	1	0	589	1	1441	0	0	No	NA	NA	NA	NA	CATTAACTGATAAGCAGAAGCGTATCACAATAAAACTAAAAAATAGATTGTGTATAAT	58	TCH1516intergenic_57554-58073
12	n284873	1325	7	589	1318	1441	0	0	No	0.985388	0.999878	-0.000641266	0.0182861	GAAGCGTATCACAAATAAAACTAAAAAATAGATTGTGT	38	TCH1516intergenic_57554-58073
12	n286571	1296	5	589	1291	1441	0	0	No	0.00418324	0.175552	0.0479212	-2.87491	CATTAACTGATAAGCAGAAGCGTATCACAAATAA	34	TCH1516intergenic_57554-58073
12	n286772	29	1	589	28	1441	0	0	No	NA	NA	NA	NA	ATTTTTTAGTTTTATTTGTGATACGCTTCTCC	32	TCH1516intergenic_57554-58073
12	n286773	1345	55	589	1290	1441	0	0	No	0.00773558	0.297057	-0.0404206	2.67194	ATTTTTTAGTTTTATTTGTGATACGCTTCTG	31	TCH1516intergenic_57554-58073
12	n287036	1374	56	589	1318	1441	0	0	No	0.00603013	0.2411	-0.0704978	2.77811	AGAAGCGTATCACAAATAAAACTAAAAAATA	31	TCH1516intergenic_57554-58073
12	n287831	1344	54	589	1290	1441	0	0	No	0.325575	0.999878	0.0148373	-0.996329	TTTTTTAGTTTTATTTGTGATACGCTTCTGC	31	TCH1516intergenic_57554-58073
12	n303740	1323	7	589	1316	1441	0	0	No	0.934031	0.999878	-0.00243321	0.0826856	GCTCCAAAGAAATAAAATTGTTGAGCAATTTGAGATAAA	39	USA300HOU_RS00245;DBGWAS_general_tag=HNH_endonuclease
12	n317366	141	50	589	91	1441	0	0	No	NA	NA	NA	NA	AACTGATAAGCAGAGGCGTATCATAAGTAAAACT	34
12	n318254	200	109	589	91	1441	0	0	No	NA	NA	NA	NA	ATAAGCAGAGGCGTATCATAAGTAAAACTAAAAA	34	TCH1516intergenic_88627-89054
12	n319034	27	27	589	0	1441	0	0	No	NA	NA	NA	NA	TTACTTATGATACGCCTCTGCTTATCAGTTGATGATG	37
12	n320687	190	99	589	91	1441	0	0	No	NA	NA	NA	NA	TAGTTTTACTTATGATACGCCTCTGCTTATC	31
12	n337714	1325	7	589	1318	1441	0	0	No	0.860158	0.999878	0.00648019	-0.176084	TTTTTGTGGATCGTGTTTTAAAAGATAATATTGAAAATTTAAAATGGGAGTTCAAAGAAAGAATTAAAGAAGAGTGGGAGCA	82	USA300HOU_RS00245;DBGWAS_general_tag=HNH_endonuclease
12	n362609	1	0	589	1	1441	0	0	No	NA	NA	NA	NA	TTAAAAATAAAATCAGTAATATTACAAAAATGATTTTTAAAACTACTAAGTTTGAGTAGAAAT	63	USA300HOU_RS00245;DBGWAS_general_tag=HNH_endonuclease
12	n368966	1321	6	589	1315	1441	0	0	Yes	0.000164251	0.0095926	0.097749	-3.77401	TAAGCGGTTGCTACATTATTTTTTCGCTCAATTTTT	36	USA300HOU_RS00245;DBGWAS_general_tag=HNH_endonuclease
12	n375379	1320	6	589	1314	1441	0	0	Yes	0.000570433	0.0303434	0.0846271	-3.44922	TGAGCGAAAAAATAATGTAGCAACCGCTTACATTTCAAAA	40	USA300HOU_RS00245;DBGWAS_general_tag=HNH_endonuclease
12	n375544	1	0	589	1	1441	0	0	No	NA	NA	NA	NA	CTTTTAAAACACGATCCACAAAAAGTAAGGATTTTGAAATGTAAGCGGTTGCTACATTATT	61	USA300HOU_RS00245;DBGWAS_general_tag=HNH_endonuclease
12	n375545	1321	7	589	1314	1441	0	0	No	0.783029	0.999878	-0.00725306	0.275214	ACGATCCACAAAAAGTAAGGGTTTTGAAATGTAAGCGGTTGC	42	USA300HOU_RS00245;DBGWAS_general_tag=HNH_endonuclease
12	n375614	1323	7	589	1316	1441	0	0	No	0.92488	0.999878	-0.00270014	0.0941218	AATAAAACTAAAAAATAGATTGTGTATAATATAAAAG	37	TCH1516intergenic_57554-58073
12	n376827	1319	6	589	1313	1441	0	0	No	0.00130868	0.0639679	0.0740436	-3.21739	AATAATGTAGCAACCGCTTACATTTCAAAACCCTTA	36	USA300HOU_RS00245;DBGWAS_general_tag=HNH_endonuclease
12	n377367	1319	7	589	1312	1441	0	0	No	0.601752	0.999878	-0.0121385	0.521596	AAGTAAGGGTTTTGAAATGTAAGCGGTTGCT	31	USA300HOU_RS00245;DBGWAS_general_tag=HNH_endonuclease
12	n377520	1321	7	589	1314	1441	0	0	No	0.990058	0.999878	0.000327582	-0.0124887	CTTTTAAAACACGATCCACAAAAAGTAAGGGTTTTGAAAT	40	USA300HOU_RS00245;DBGWAS_general_tag=HNH_endonuclease
12	n378531	1318	6	589	1312	1441	0	0	No	0.00197962	0.0906774	0.0690859	-3.09616	AGTAAGGGTTTTGAAATGTAAGCGGTTGCTAC	32	USA300HOU_RS00245;DBGWAS_general_tag=HNH_endonuclease
12	n387795	1323	7	589	1316	1441	0	0	No	0.934031	0.999878	-0.00243321	0.0826856	AATTGCTCAACAATTTTATTTCTTTGGAGCTGG	33	USA300HOU_RS00245;DBGWAS_general_tag=HNH_endonuclease
12	n392515	1325	7	589	1318	1441	0	0	No	0.860158	0.999878	0.00648019	-0.176084	TTTTTCTTTAAAAATAAAATCAGTAATATTACAAAAA	37	USA300HOU_RS00245;DBGWAS_general_tag=HNH_endonuclease
12	n395163	1654	254	589	1400	1441	0	0	No	0.4981	0.999878	-0.0114244	0.677209	ATTTTTTAGTTTTACTTATGATACGCCTCTGC	32	TCH1516intergenic_88627-89054
12	n403823	1322	7	589	1315	1441	0	0	No	0.973631	0.999878	0.000942986	-0.0330572	CCTTACTTTTTGTGGATCGTGTTTTAAAAGATAATA	36	USA300HOU_RS00245;DBGWAS_general_tag=HNH_endonuclease
13	n1107	1	0	589	1	1441	0	0	No	NA	NA	NA	NA	TAAAAACCTGGTGGCACGCATTGAATGATGTTGCCATCAGGCTTTATTGTTGTGCTTTTCG	61	TCH1516intergenic_650748-650799~~~NCTC8325intergenic_583000-583051
13	n5435	580	580	589	0	1441	0	0	Yes	8.12673e-115	1.19833e-111	-0.96022	-93.6197	AACGACATGAAGAACGTAAACGTCGTAAAGAAGAACAAGATAGAAAGCTTAAAGAAAAATT	61	SAOUHSC_00580;DBGWAS_general_tag=hypothetical_protein~~~USA300HOU_RS03100;DBGWAS_general_tag=hypothetical_protein
13	n36001	2029	588	589	1441	1441	0	0	No	NA	NA	NA	NA	TTGGAAAAATTAGATCCCGATGCTGAAATCGTGATAGGTTGTCAATCTTATTGTGGACCTGGACGCCGAAAAACATTCACTTTTGTTAATAA	92	SAOUHSC_00580;DBGWAS_general_tag=hypothetical_protein~~~USA300HOU_RS03100;DBGWAS_general_tag=hypothetical_protein
13	n105622	1	0	589	1	1441	0	0	No	NA	NA	NA	NA	ACGCCGAAAAACATTCACTTTTGTTAATAATCGCCCACTGGCTGCGCTTACTGAAGAAGAA	61	SAOUHSC_00580;DBGWAS_general_tag=hypothetical_protein~~~USA300HOU_RS03100;DBGWAS_general_tag=hypothetical_protein
13	n136993	1	0	589	1	1441	0	0	No	NA	NA	NA	NA	TGAGAAACTTTTTCGATTAATTCTTCTTCAATAAGCGCAGCCAGTGGGCGGTTATTAACAA	61	SAOUHSC_00580;DBGWAS_general_tag=hypothetical_protein~~~USA300HOU_RS03100;DBGWAS_general_tag=hypothetical_protein
13	n136995	2028	588	589	1440	1441	0	0	No	NA	NA	NA	NA	TGAGAAACTTTTTCGATTAATTCTTCTTCAGTAAGCGCAGCCAGTGGGCG	50	SAOUHSC_00580;DBGWAS_general_tag=hypothetical_protein~~~USA300HOU_RS03100;DBGWAS_general_tag=hypothetical_protein
13	n199452	2027	588	589	1439	1441	0	0	No	NA	NA	NA	NA	TTGTTAATAACCGCCCACTGGCTGCGCTTACTGAAGAAGAA	41	SAOUHSC_00580;DBGWAS_general_tag=hypothetical_protein~~~USA300HOU_RS03100;DBGWAS_general_tag=hypothetical_protein
13	n201688	2028	588	589	1440	1441	0	0	No	NA	NA	NA	NA	TAAGCGCAGCCAGTGGGCGGTTATTAACAAAAGTGAATGTTTTTCGGCGT	50	SAOUHSC_00580;DBGWAS_general_tag=hypothetical_protein~~~USA300HOU_RS03100;DBGWAS_general_tag=hypothetical_protein
13	n218761	2028	588	589	1440	1441	0	0	No	NA	NA	NA	NA	CGAAAAGCACAACAATAAAGCCTGATGGCAGCATCATTCAATGCGTGC	48	TCH1516intergenic_650748-650799~~~NCTC8325intergenic_583000-583051
13	n220552	2029	588	589	1441	1441	0	0	No	NA	NA	NA	NA	AGAACAAGATAGAAAGCTTAAAGAAAAATTAGAAAAGCGAAAAGCACAACAATAAAGCCTGATGGCA	67	SAOUHSC_00580;DBGWAS_general_tag=hypothetical_protein~~~USA300HOU_RS03100;DBGWAS_general_tag=hypothetical_protein
[truncated: 5,278 more rows]

## Sheet: Network Analysis
CompId	NodeId	AlleleFreq	Pheno0Count	Pheno0TotalCount	Pheno1Count	Pheno1TotalCount	NACount	NATotalCount	Significant?	p-value	q-Value	EstEffect	WaldStat	Sequence	SequenceLength	Annotations(sep=~~~)
0	n135	1566	209	589	1357	1441	0	0	No	9.52E-01	1.00E+00	6.83E-04	-0.0600472	AATCTTACTTTGGCACATGGTAGAAAAAAAAGATAACCAGCCTCATACAGATTA	54
0	n1880	51	51	589	0	1441	0	0	No	NA	NA	NA	NA	CATGGTAGAAGAAAAAGATAACCAGCCTCAAAAGCTTTATCACTTATTATTGATAATTTTGACTGCATCATTAATAATATTTTTTGTTAATTGAGCTGCATCGACTGTGTCAGCTAATCTAGTACTTTGTCCACTCCAAATATGGGTCCACTCAGTATATCCTTTCTCCAAAGCAGATTTTCGTATTTGCGTTGTTAATTGATTTTGTAAAGGATAAGGAGGCACCTGTTTTGAATATAAATTCATATTGTGTACAAATTCATTCATAATTCCGCGAGCCAATTTGCCACTAAATACATTTGTCAGTATTGTATCTGTTTCAGAGCTTTCAATAATTTCATTTTTGATTTTGTCATCAGCGCCACTTTCATTCGTTGTTAAATAAGCAGTACCTAATT	398
0	n1881	1	1	589	0	1441	0	0	No	NA	NA	NA	NA	CATGGTAGAAGAAAAAGATAACCAGCCTCATACCGATTACCTACACATTTTCAAACTACAAGAA	64	USA300HOU_RS00290;DBGWAS_general_tag=hypothetical_protein
0	n12001	41	13	589	28	1441	0	0	No	NA	NA	NA	NA	TAATCTGTATGAGGCTGGTTATCTTTTTTTCTACCATGTGCCAAAGTAAGATT	53
0	n15899	52	52	589	0	1441	0	0	No	NA	NA	NA	NA	CTTCAAATCTTACTTTGGCACATGGTAGAAGAAAAAGATAACCAGCCTCA	50	USA300HOU_RS00185;DBGWAS_general_tag=hypothetical_protein
0	n19785	51	51	589	0	1441	0	0	No	NA	NA	NA	NA	TAATAGCTCGCTATTAATGTTTTTATAATAATAAAGAAAAGTAAAGAAGGTGAAAAAAGTG	61	TCH1516intergenic_61153-61682
0	n19786	1328	7	589	1321	1441	0	0	No	9.32E-01	1.00E+00	-0.00457	0.0860999	TAATAGCTCGCTATTAATGTTTTTATAATAGTAAAGAAAAGTAAAGAAGGTGAAAAAAGTG	61	TCH1516intergenic_61153-61682
0	n26203	1	0	589	1	1441	0	0	No	NA	NA	NA	NA	TTCTATTAAAAAAATAAGTCACTTATATATAGTCAAGTCCAGACTCCTGTGTA	53
0	n26204	1323	7	589	1316	1441	0	0	No	5.91E-01	1.00E+00	-0.014	0.536945	TTCTATTAAAAAAATAAGTCACTTATATATCAACTTAT	38
0	n26205	50	50	589	0	1441	0	0	No	NA	NA	NA	NA	CAACATTATCAGAGGAATTAAAATTTTATTAAAAAAATAAGTGACTTATATATCAACTTAT	61
0	n26380	1326	7	589	1319	1441	0	0	No	8.29E-01	1.00E+00	-0.00747	0.215994	AAAAAATAAGTCACTTATATATCAACTTATTAAGGGAGTCCTA	43	TCH1516intergenic_60717-60793
0	n26381	51	51	589	0	1441	0	0	No	NA	NA	NA	NA	AAAAAATAAGTGACTTATATATCAACTTATTAAGGGAGTTCTATACTCCCTTTTTTAATGCAATTGTTTTTATAAACAATGACTTTATTTATAGTCTAAGATGCTTACTTCGATGTTTCTAATGACATCTCGCGAAGCATCAAAACTGTTATTAATATAACCATTTTTATTAATCGATAAAGAAATCGATTGGCCTGCATAAAAATTTAATTTCTAGTTAAACTTAGAATAATAATTTATAAATCATCAATGATTTGAAGTAAGATTGTCAAAATGATAAATTATTTCCTCAAAATTTTTACTTTTATTAATAACTTTATACTCATTTGAATTAGTGAAAT	341
0	n27347	1379	58	589	1321	1441	0	0	Yes	5.27E-04	2.83E-02	-0.1	3.5174	TCATCAGCAAGTATCCATACAAATAAAGGTAAAATGACAGGTGCGAAAAAGATACTTAAATAACTCAATGCTGATAAAACGTAACTATTGTCATTTTTATGCATATTACTATTTGTATTTTCCACTTTTTTCACCTTCTTTACTTTTCTTTA	152	USA300HOU_RS00260;DBGWAS_general_tag=hypothetical_protein
0	n28661	1	1	589	0	1441	0	0	No	NA	NA	NA	NA	CAACATTATCAGAGGAATTAAAATTTTATTTAAAAAATAAGTGACTTATATATCAACTTAT	61
0	n38160	1	0	589	1	1441	0	0	No	NA	NA	NA	NA	ATAAGTTGATATATAAGTGACTTATTTTTTAATAGAATTTTAATTCCTCTGTTA	54	USA300HOU_RS00260;DBGWAS_general_tag=hypothetical_protein
0	n41999	1324	7	589	1317	1441	0	0	No	5.62E-01	1.00E+00	-0.0166	0.580083	ATATATAAGTGACTTATTTTTTTAATAGAATTTTAATTCCTCTGTTA	47
0	n51688	1328	7	589	1321	1441	0	0	No	9.32E-01	1.00E+00	-0.00457	0.0860999	TATAGTTTTTATTAAAGATTCCAATTTCTTATTATTATCTGTAAGAGAAAGATTCTCTGGAAATATAAGTACACCGTAGTTATAGTTATCTTCGACAGTGAAGTCAGAAGCTTTTAACTTCAAATCGTCTTGGCTTTTTAAAAATGAACCATTAACAATATCTTCAATATAAGTACCTTTTCCAATAAATTTCGCTACTCACTTCGATTGTGGATGATAATATAAATT	228	TCH1516intergenic_61153-61682
0	n71381	1	0	589	1	1441	0	0	No	NA	NA	NA	NA	GATGAACCAACATCAGAACATGGCAAAAAAAGCATTCATTAATCATATTATGACT	55
0	n71382	1327	7	589	1320	1441	0	0	No	9.01E-01	1.00E+00	-0.00525	0.124039	GATGAACCAACATCAGAACATGGCAAAAAAGCATTCATTAATCATATTATGACT	54	USA300HOU_RS00260;DBGWAS_general_tag=hypothetical_protein
0	n84133	51	51	589	0	1441	0	0	No	NA	NA	NA	NA	AATAAAATTTTAATTCCTCTGATAATGTTGAGAATATATAATATTAAAGCAATTAAAAAGAAT	63	USA300HOU_RS00260;DBGWAS_general_tag=hypothetical_protein
0	n89644	51	51	589	0	1441	0	0	No	NA	NA	NA	NA	TATATAATATTAAAGCAATTAAAAAGAATACAATAGCAATGATTAAAGCAATAACAAATATTAATAATTGATGATCAAACGGTTTATCAAAGACTCCTTTTGAAAAAATAAAAATTCCTCTGCCTACACAAAAACTAATCCATGTCATAATATGATTCCCTAATGCTTTTTTACCATGTCCTGATGTTGGCTCATCAGCAAGTATCCATACAAATAAAGGT	221	USA300HOU_RS00260;DBGWAS_general_tag=hypothetical_protein
0	n89645	1327	7	589	1320	1441	0	0	No	3.26E-01	1.00E+00	-0.0424	0.983245	TATATAATATTAAAGCAATTAAAAAGAATATAATAG	36	USA300HOU_RS00260;DBGWAS_general_tag=hypothetical_protein
0	n89646	1	0	589	1	1441	0	0	No	NA	NA	NA	NA	TCAAGATATATAATATTAAAGCAATTAAAAGAATATAATAGTAATAATTAAAAGAA	56	USA300HOU_RS00260;DBGWAS_general_tag=hypothetical_protein
0	n93583	1327	7	589	1320	1441	0	0	No	3.26E-01	1.00E+00	-0.0424	0.983245	TTCTTTTAATTATTACTATTATATTCTTTTTAATTGCTTTAATAT	45	USA300HOU_RS00260;DBGWAS_general_tag=hypothetical_protein
0	n94829	1	0	589	1	1441	0	0	No	NA	NA	NA	NA	TAATTCCTCTGTTAATGTTCAAGATATATATATTAAAGCAATTAAAAAGAATATAATAG	59	USA300HOU_RS00260;DBGWAS_general_tag=hypothetical_protein
0	n95428	3	3	589	0	1441	0	0	No	NA	NA	NA	NA	AAGTCATTGAGATCATGAAAGAAAAACAGAATGGAGAAAAATAGTATGAACATCAATCGATACATCA	67
0	n98845	1325	7	589	1318	1441	0	0	No	6.50E-01	1.00E+00	-0.0139	0.453941	AAGAAATTGGAATCTTTAATAAAAACTATACTATTTACAGGTAAACGATATCAATATACTT	61	TCH1516intergenic_61153-61682
0	n131165	1328	7	589	1321	1441	0	0	No	9.32E-01	1.00E+00	-0.00457	0.0860999	AAAAGAATATAATAGTAATAATTAAAAGAATGCTAAATATTAATAATTGATGATCCAAAGGTTTATCAAAGACTTCTTTAGAAAAAATAAATGCCAATCTACCTATAAAAA	111	USA300HOU_RS00260;DBGWAS_general_tag=hypothetical_protein
0	n137171	51	51	589	0	1441	0	0	No	NA	NA	NA	NA	TTCACTTTTTTTAATAATAATAAAATTATCTATTTTTCTATATTTAGGTTTTACCATACGATATTCATCATTTTTATTTAATGTTATGTAAAAATCAGTTAAATCATTTTCATTAATAAGTCTTAGCGAATCATCTGCCATAATTTTTATTATAAAAATTGATTTTAATATATGCACTATAAAGATACAGATATTTAAAAACAAGAGACACTTATACAAATGTTTTGAAT	230
0	n149321	1327	7	589	1320	1441	0	0	No	8.07E-01	1.00E+00	-0.0101	0.244834	TATATATCTTGAACATTAACAGAGGAATTAAAATTCTATTAAAAAA	46	USA300HOU_RS00260;DBGWAS_general_tag=hypothetical_protein
0	n151170	1328	7	589	1321	1441	0	0	No	9.32E-01	1.00E+00	-0.00457	0.0860999	TAATTCCTCTGTTAATGTTCAAGATATATAATATTAAAGCAATTAAAA	48	USA300HOU_RS00260;DBGWAS_general_tag=hypothetical_protein
0	n189986	1328	7	589	1321	1441	0	0	No	9.32E-01	1.00E+00	-0.00457	0.0860999	TAGCGAGCTATTACAACAGTTATAAGAGAAGCTTACGATATTGTAAGTATGTGTTGTTATAAT	63	TCH1516intergenic_61153-61682
0	n219166	3	0	589	3	1441	0	0	No	NA	NA	NA	NA	AAGAAATTGGAATCTTTAATAAAAACTATAATATTTACAGGTAAACGATATCAATATACTT	61	TCH1516intergenic_61153-61682
0	n232574	1328	7	589	1321	1441	0	0	No	9.32E-01	1.00E+00	-0.00457	0.0860999	TCAGGTCTTTCTTAATTTTATATTGATTATAACAACACATACTTACAATATCGTA	55	TCH1516intergenic_61153-61682
0	n234200	1	0	589	1	1441	0	0	No	NA	NA	NA	NA	TTTACTATTATAACAACACATACTTACAATATCGTA	36	TCH1516intergenic_61153-61682
0	n269988	51	51	589	0	1441	0	0	No	NA	NA	NA	NA	TAGCGAGCTATTACAACAGTTATAAGAGAAACTTACAATAATGAAAGTATTCCACTAGACCTTCAAAT	68	USA300HOU_RS00185;DBGWAS_general_tag=hypothetical_protein~~~TCH1516intergenic_61153-61682
0	n271265	1	0	589	1	1441	0	0	No	NA	NA	NA	NA	CTAGACCTTCAAATCTTACTTTGGAACATGATAAAAGATCGAGACAATCAACTTAATACAG	61	USA300HOU_RS00290;DBGWAS_general_tag=hypothetical_protein
0	n281208	38	38	589	0	1441	0	0	No	NA	NA	NA	NA	ATGAAAGAAATTCAAGACGAGGTAAAATAACATGAAAATCAATCGATACATCACAAGAGG	60	USA300HOU_RS00290;DBGWAS_general_tag=hypothetical_protein~~~USA300HOU_RS00185;DBGWAS_general_tag=hypothetical_protein
0	n281308	1608	222	589	1386	1441	0	0	No	4.51E-01	1.00E+00	-0.0272	0.753781	CATGAAAATCAATCGATACATCACAAGAGGAATTAAT	37	USA300HOU_RS00290;DBGWAS_general_tag=hypothetical_protein~~~USA300HOU_RS00185;DBGWAS_general_tag=hypothetical_protein
0	n283238	4	4	589	0	1441	0	0	No	NA	NA	NA	NA	AAAATAGTATGAACATCAATCGATACATCACAAGAGGAATTAAT	44	USA300HOU_RS00185;DBGWAS_general_tag=hypothetical_protein
0	n284213	1612	226	589	1386	1441	0	0	No	6.41E-01	1.00E+00	-0.014	0.466215	ATCAATCGATACATCACAAGAGGAATTAATGAAAGTATTCCACTAGACCTTCAAAT	56	USA300HOU_RS00185;DBGWAS_general_tag=hypothetical_protein
0	n286334	1608	222	589	1386	1441	0	0	No	4.51E-01	1.00E+00	-0.0272	0.753781	AAGGGAGGGAAATAGCATGAAAATCAATCGATACATCACAAGAGG	45	USA300HOU_RS00290;DBGWAS_general_tag=hypothetical_protein~~~USA300HOU_RS00185;DBGWAS_general_tag=hypothetical_protein
0	n287934	1310	6	589	1304	1441	0	0	No	9.29E-01	1.00E+00	-0.00185	0.0891846	AAAAAATAAATGCCAATCTACCTATAAAAAAACTAACCCAAGTCATAATATGATTAATGAA	61	USA300HOU_RS00260;DBGWAS_general_tag=hypothetical_protein
0	n288096	1328	7	589	1321	1441	0	0	No	9.32E-01	1.00E+00	-0.00457	0.0860999	AAAAAAGCATTCATTAATCATATTATGACTTGGGTTAGT	39	USA300HOU_RS00260;DBGWAS_general_tag=hypothetical_protein
0	n288389	18	1	589	17	1441	0	0	No	NA	NA	NA	NA	AAAAAATAAATGCCAATCTACCTATAAAAAGACTAACCCAAGTCATAATATGATTAATGAA	61	USA300HOU_RS00260;DBGWAS_general_tag=hypothetical_protein
0	n306269	1328	7	589	1321	1441	0	0	No	9.32E-01	1.00E+00	-0.00457	0.0860999	ACCTTTATTTGTATGGATACTTGCTGATGAACCAACATCAGAACATGGCAAAAAA	55	USA300HOU_RS00260;DBGWAS_general_tag=hypothetical_protein
0	n306842	1	1	589	0	1441	0	0	No	NA	NA	NA	NA	GATAATTTTATTATTATTAAAAAAAGTGAATATTTCACTAATTCAAATGAGTATAAAGTTA	61
0	n306843	50	50	589	0	1441	0	0	No	NA	NA	NA	NA	GATAATTTTATTATTATTAAAAAAAGTGAAGATTTCACTAATTCAAATGAGTATAAAGTTA	61
0	n310391	1	0	589	1	1441	0	0	No	NA	NA	NA	NA	TCACTTCGATTGTGGATGATAATATAAATTTTCAGGTCTTTCTTAATTTTATATTGATTAT	61	TCH1516intergenic_61153-61682
0	n311603	1327	7	589	1320	1441	0	0	No	4.53E-01	1.00E+00	-0.0308	0.750855	ATAATCAATATAAAATTAAGAAAGACCTGAGAATTTATATTATCATCCACAATCGAAGTGA	61	TCH1516intergenic_61153-61682
0	n318005	1612	226	589	1386	1441	0	0	No	6.41E-01	1.00E+00	-0.014	0.466215	TAATGAAAGTATTCCACTAGACCTTCAAATCTTACTTTGG	40	USA300HOU_RS00185;DBGWAS_general_tag=hypothetical_protein
0	n327889	1607	222	589	1385	1441	0	0	No	4.84E-01	1.00E+00	-0.0232	0.699926	CTTCAAATCTTACTTTGGCACATGGTAGAAAAAAA	35	USA300HOU_RS00185;DBGWAS_general_tag=hypothetical_protein
0	n329955	1366	47	589	1319	1441	0	0	No	8.59E-01	1.00E+00	3.88E-03	-0.177984	TTTTACCATGTTCCAAAGTAAGATTTGAAGGTCTAG	36	USA300HOU_RS00290;DBGWAS_general_tag=hypothetical_protein
0	n329956	1608	223	589	1385	1441	0	0	No	5.22E-01	1.00E+00	-0.0201	0.639415	TTCTACCATGTGCCAAAGTAAGATTTGAAGGTCTAGTGGAAT	42	USA300HOU_RS00185;DBGWAS_general_tag=hypothetical_protein
0	n330094	1	0	589	1	1441	0	0	No	NA	NA	NA	NA	TCCACTAGACCTTCAAATCTTACTTTGGAACATG	34	USA300HOU_RS00290;DBGWAS_general_tag=hypothetical_protein~~~USA300HOU_RS00185;DBGWAS_general_tag=hypothetical_protein
0	n330095	3	3	589	0	1441	0	0	No	NA	NA	NA	NA	TCCACTAGACCTTCAAATCTTACTTTGGAATATG	34	USA300HOU_RS00185;DBGWAS_general_tag=hypothetical_protein
0	n330774	4	3	589	1	1441	0	0	No	NA	NA	NA	NA	ATTCCACTAGACCTTCAAATCTTACTTTGGAA	32	USA300HOU_RS00185;DBGWAS_general_tag=hypothetical_protein
0	n331330	15	14	589	1	1441	0	0	No	NA	NA	NA	NA	CCATATTCCAAAGTAAGATTTGAAGGTCTAG	31
0	n347112	1	1	589	0	1441	0	0	No	NA	NA	NA	NA	TGATGTATCGATTGATGTTCATACTATTTTCCTCC	35
0	n377299	1327	7	589	1320	1441	0	0	No	3.26E-01	1.00E+00	-0.0424	0.983245	TCAAGATATATAATATTAAAGCAATTAAAAAGAAT	35	USA300HOU_RS00260;DBGWAS_general_tag=hypothetical_protein
0	n378001	1378	58	589	1320	1441	0	0	Yes	1.38E-04	8.14E-03	-0.103	3.86296	ATATATAATATTAAAGCAATTAAAAAGAATA	31	USA300HOU_RS00260;DBGWAS_general_tag=hypothetical_protein
0	n389978	1379	58	589	1321	1441	0	0	Yes	5.27E-04	2.83E-02	-0.1	3.5174	TATTATAAAAACATTAATAGCGAGCTATTACAACAGTTATAAGAGAA	47	TCH1516intergenic_61153-61682
1	n150	6	6	589	0	1441	0	0	No	NA	NA	NA	NA	CCCAGCCTATTCTTTTCATAAAAAAAAGGGGCTGACCCAAAAGTAGCTCCT	51
1	n531	40	14	589	26	1441	0	0	No	NA	NA	NA	NA	AAAAAATAAATTCTAAAATTTTACAAATAAAA	32
1	n949	7	7	589	0	1441	0	0	No	NA	NA	NA	NA	AAAAAAGGGGCTGACCCAAAAGTAGCTCCTA	31
1	n1333	1	0	589	1	1441	0	0	No	NA	NA	NA	NA	TTCATAATTTGAAATGCTATATTATAAAAATACTAATGGGTTTTATGCATCTCGTAGGTTTGTAGAA	67	TCH1516intergenic_1179209-1179516~~~NCTC8325intergenic_1085307-1085614
1	n2151	9	9	589	0	1441	0	0	No	NA	NA	NA	NA	AAAAAGGGGCTGACCCAAAAGTAGCTCCTAT	31
1	n2697	1	1	589	0	1441	0	0	No	NA	NA	NA	NA	AAAATAAATTCTAAAATTTTACAAATAAAAGGGAGTGGGACAGAAATAATATTT	54
1	n4316	16	16	589	0	1441	0	0	No	NA	NA	NA	NA	AAAAGGGGCTGACCCAAAAGTAGCTCCTATA	31
1	n6672	1	0	589	1	1441	0	0	No	NA	NA	NA	NA	GTCCCGGACTCTTTTTTATTATTAAGTAAATTATAAAAGACAATTTCTTAATTAATATATGATATACCTATATCTAATAATTTATT	86
1	n8704	2	2	589	0	1441	0	0	No	NA	NA	NA	NA	TTCCTTACATTACTTTACCTAAAACAAAAAGGGGCTGACCCAAAAGTAGCTCCTA	55	TCH1516intergenic_1107365-1107532~~~NCTC8325intergenic_1013293-1013460
1	n12813	1	1	589	0	1441	0	0	No	NA	NA	NA	NA	ATAAGTAATTGAAAGATAAAACATAAAAAAGGGGCTGACCCAAAAGTAGCTCCT	54	TCH1516intergenic_2165192-2165509~~~NCTC8325intergenic_2111488-2111805
1	n15744	1	1	589	0	1441	0	0	No	NA	NA	NA	NA	TAATTTTTATTTACATTTTTAACTTATAAATCAAAACCACCCGTGTGAACGGGT	54	TCH1516intergenic_2825185-2826032~~~NCTC8325intergenic_2773601-2774449~~~TCH1516intergenic_1917784-1917919~~~NCTC8325intergenic_1820726-1820861
1	n15832	1	1	589	0	1441	0	0	No	NA	NA	NA	NA	TTATATCTTTTATACATGTACATTATCACCGATAAAGTCCGTATAATTGTGTAAA	55	TCH1516intergenic_1804712-1805352~~~NCTC8325intergenic_1705641-1707965
1	n17226	6	6	589	0	1441	0	0	No	NA	NA	NA	NA	AATATTATTTCTGTCCCACTCCCTTTTATGCATGCGCTAAAGCGCAGGCGAA	52	TCH1516intergenic_2504696-2505099~~~NCTC8325intergenic_2451645-2452048
1	n17267	1	0	589	1	1441	0	0	No	NA	NA	NA	NA	ATCCAAGAACTTTATGTCCCGGACTCTCTTTTTTTTGAAAATTTAACTTCAAAA	54
1	n17912	10	10	589	0	1441	0	0	No	NA	NA	NA	NA	ATCTTACTGCTGTTTTTTTTAGGGATTAATATCCCAGACTCTTTAGTTTATTTATTTTCAA	61	TCH1516intergenic_2478113-2478687~~~NCTC8325intergenic_2425060-2426130
1	n17913	1822	530	589	1292	1441	0	0	No	3.45E-02	1.00E+00	1.75E-02	-2.11547	TACTGCTGTTTTTTTTAGGGATTAATGTCCCAG	33
1	n17914	6	4	589	2	1441	0	0	No	NA	NA	NA	NA	TTATCTTACTGCTGTTTTTTTTTAGGGATTAATGTCCCAGACTCT	45
1	n21283	1	0	589	1	1441	0	0	No	NA	NA	NA	NA	TGTGGGTAATTTATATAATTTTTATTTACACTTTTAACTTATAAAAAAAGCGCCTATGTCA	61	TCH1516intergenic_2825185-2826032~~~NCTC8325intergenic_2773601-2774449
1	n21287	1506	96	589	1410	1441	0	0	Yes	1.06E-07	8.91E-06	7.82E-02	-5.35617	TTTTATTTACATTTTTAACTTATAAAAAAAGCGCCTATG	39
1	n21916	1	1	589	0	1441	0	0	No	NA	NA	NA	NA	ACATGTAAAACTACAATATTTTATTGAGCTGTTTAATTTGATTTTAAGGAAAACCTTTTAT	61	TCH1516intergenic_756512-756724~~~NCTC8325intergenic_675684-675902
1	n25109	3	3	589	0	1441	0	0	No	NA	NA	NA	NA	TAAAAAGGGGCTGACCCAAAAGTAGCTCCTA	31
1	n25508	94	45	589	49	1441	0	0	No	NA	NA	NA	NA	TCTCTTTTTTTTGAAAATTTAACTTCAAAAA	31
1	n26859	2015	584	589	1431	1441	0	0	No	NA	NA	NA	NA	AAAGTAAAAATAACTAATAACATTTAGAGGCTGGGA	36
1	n28046	1991	561	589	1430	1441	0	0	No	NA	NA	NA	NA	AAAATAACTAATAACATTTAGAGGCTGGGACATAAATCCC	40	TCH1516intergenic_2071731-2072077~~~NCTC8325intergenic_2018124-2018696
1	n30701	1	1	589	0	1441	0	0	No	NA	NA	NA	NA	ACCTAATATAAATATAATTACTGATAATATGATAAAGTCCGTATAATTGTGTAAA	55	USA300HOU_RS13620;DBGWAS_general_tag=MFS_transporter~~~SAOUHSC_02818;DBGWAS_general_tag=hypothetical_protein
1	n33630	1974	545	589	1429	1441	0	0	No	NA	NA	NA	NA	ATAACATTTAGAGGCTGGGACATAAATCCCTAAAAAA	37	TCH1516intergenic_2071731-2072077~~~NCTC8325intergenic_2018124-2018696~~~TCH1516intergenic_318637-318882~~~NCTC8325intergenic_264152-264824
1	n33631	1	1	589	0	1441	0	0	No	NA	NA	NA	NA	ATAACATTTAGAGGCTGGGACATAAATCCCGAAAAAACAGCAGTAAGATAATTTTCAATTA	61	TCH1516intergenic_1804712-1805352~~~NCTC8325intergenic_1705641-1707965~~~TCH1516intergenic_2478113-2478687~~~TCH1516intergenic_2071731-2072077~~~NCTC8325intergenic_2018124-2018696~~~TCH1516intergenic_318637-318882~~~NCTC8325intergenic_264152-264824~~~TCH1516intergenic_2317347-2317802~~~TCH1516intergenic_1893139-1893485~~~NCTC8325intergenic_2263981-2266096~~~NCTC8325intergenic_1794848-1796426~~~TC…
1	n33964	1	1	589	0	1441	0	0	No	NA	NA	NA	NA	TTTTTTCAATTCTAGTCAACCTTGCCGGAGTGGGACGACGAAATAAATTTTGCTAAAAT	59	USA300HOU_RS15360;DBGWAS_general_tag=hypothetical_protein~~~NCTC8325intergenic_1776134-1776997~~~USA300HOU_RS15240;DBGWAS_general_tag=hypothetical_protein~~~NCTC8325intergenic_977455-978260~~~USA300HOU_RS15110;DBGWAS_general_tag=hypothetical_protein~~~NCTC8325intergenic_720044-720394~~~NCTC8325intergenic_603627-604015
1	n33973	1	1	589	0	1441	0	0	No	NA	NA	NA	NA	TTCAATTCTAGTCAACCTTGCCGGCGGGGGACGACGAAATAAATTTTACGAAAATAT	57	USA300HOU_RS15240;DBGWAS_general_tag=hypothetical_protein~~~NCTC8325intergenic_977455-978260~~~USA300HOU_RS15110;DBGWAS_general_tag=hypothetical_protein~~~NCTC8325intergenic_720044-720394~~~NCTC8325intergenic_603627-604015
1	n36927	1	0	589	1	1441	0	0	No	NA	NA	NA	NA	TTTAGCAAAGGTAATAATGATATTAATAATATACAAAAAATATAAATCAAATCGACATCCT	61	USA300HOU_RS00785;DBGWAS_general_tag=hypothetical_protein~~~SAOUHSC_00111;DBGWAS_general_tag=hypothetical_protein
1	n36928	2010	570	589	1440	1441	0	0	No	NA	NA	NA	NA	CAAAGGTAATAATGATATTAATAATGTACAAAAAATATAAAT	42	USA300HOU_RS00785;DBGWAS_general_tag=hypothetical_protein~~~SAOUHSC_00111;DBGWAS_general_tag=hypothetical_protein
1	n37891	1	1	589	0	1441	0	0	No	NA	NA	NA	NA	TTAAGCTTTATTTGAAAAACGAAAAATGTCGATAAAGTCCGTATAATTGTGTAAAAGT	58	TCH1516intergenic_1056181-1056376~~~NCTC8325intergenic_962108-962303
1	n37960	2028	587	589	1441	1441	0	0	No	NA	NA	NA	NA	ACCAACACAAGTACCTAATATAAATATAATTACTGATAATAT	42	USA300HOU_RS13620;DBGWAS_general_tag=MFS_transporter~~~SAOUHSC_02818;DBGWAS_general_tag=hypothetical_protein
1	n39986	2026	586	589	1440	1441	0	0	No	NA	NA	NA	NA	ACCTAATATAAATATAATTACTGATAATATA	31	USA300HOU_RS13620;DBGWAS_general_tag=MFS_transporter~~~SAOUHSC_02818;DBGWAS_general_tag=hypothetical_protein
1	n42409	1	0	589	1	1441	0	0	No	NA	NA	NA	NA	AAAATATTGTAGTTTTACATGTAAAAGAAAGTGAATATATACATCTTTAGTCTAGTATTAT	61	TCH1516intergenic_756512-756724~~~NCTC8325intergenic_675684-675902
1	n47030	5	0	589	5	1441	0	0	No	NA	NA	NA	NA	TTTACTTAATAATAAAAAAGAGTCCGGGACATAAAGTTCTTGGA	44
1	n47754	9	4	589	5	1441	0	0	No	NA	NA	NA	NA	AAAAAGAGTCCGGGACATAAAGTTCTTGGAT	31
1	n49362	18	13	589	5	1441	0	0	No	NA	NA	NA	NA	AAAAGAGTCCGGGACATAAAGTTCTTGGATA	31
1	n52084	3	3	589	0	1441	0	0	No	NA	NA	NA	NA	TGAAATGTTTATAATAATATTGAAAGATATGATAAAGTCCGTATAATTGTGTAAA	55
1	n52335	19	19	589	0	1441	0	0	No	NA	NA	NA	NA	CTTTGCTAAATATTATAAAAAGATATAAGAGAGTCCGGGACATAAAGTTCTTGG	54	SAOUHSC_00111;DBGWAS_general_tag=hypothetical_protein
1	n52440	27	19	589	8	1441	0	0	No	NA	NA	NA	NA	AAAGAGTCCGGGACATAAAGTTCTTGGATAA	31	USA300HOU_RS00175;DBGWAS_general_tag=IS5/IS1182_family_transposase
1	n54091	1	1	589	0	1441	0	0	No	NA	NA	NA	NA	TTATCCAAGAACTTTATGTCCCGGACTCTCCTTAACTATACGATAAACAGTAGAGCGA	58	USA300HOU_RS00175;DBGWAS_general_tag=IS5/IS1182_family_transposase
1	n54092	1	1	589	0	1441	0	0	No	NA	NA	NA	NA	CCAAGAACTTTATGTCCCGGACTCTCTTATGCATGCGCTTAGCGCAGGCGC	51	TCH1516intergenic_2265137-2265636
1	n54097	2	2	589	0	1441	0	0	No	NA	NA	NA	NA	AACTTTATGTCCCGGACTCTTTTATGCATGCGCTAAAGCGCAGGCGAA	48	TCH1516intergenic_2504696-2505099~~~NCTC8325intergenic_2451645-2452048
1	n54100	1	0	589	1	1441	0	0	No	NA	NA	NA	NA	CCAAGAACTTTATGTCCCGGACTCTTTTTATTATTAAGTAAAATTATAAAAGAC	54
1	n54101	2	2	589	0	1441	0	0	No	NA	NA	NA	NA	TCCAAGAACTTTATGTCCCGGACTCTTTTTCTTATATCTTTTTATAATATTT	52	SAOUHSC_00111;DBGWAS_general_tag=hypothetical_protein
1	n54195	1	0	589	1	1441	0	0	No	NA	NA	NA	NA	ATTTCTGTCCCACTCCCTAATAACTGAGTTATAATAAAGTCTTTTAACCCACATTAAATAT	61	NCTC8325intergenic_977455-978260~~~TCH1516intergenic_1071528-1072182
1	n57062	10	10	589	0	1441	0	0	No	NA	NA	NA	NA	ATCCAAGAACTTTATGTCCCGGACTCTTTTATGCATG	37
1	n57255	21	20	589	1	1441	0	0	No	NA	NA	NA	NA	AAGAGAGTCCGGGACATAAAGTTCTTGGATAA	32	USA300HOU_RS00175;DBGWAS_general_tag=IS5/IS1182_family_transposase
1	n59908	70	62	589	8	1441	0	0	No	NA	NA	NA	NA	ACTTATCCAAGAACTTTATGTCCCGGACTCT	31	USA300HOU_RS00175;DBGWAS_general_tag=IS5/IS1182_family_transposase
1	n60744	20	20	589	0	1441	0	0	No	NA	NA	NA	NA	ATAAGAGAGTCCGGGACATAAAGTTCTTGGAT	32
1	n61591	2005	575	589	1430	1441	0	0	No	NA	NA	NA	NA	AAAATATCATTTCTGTCCCACTCCCTAATAACTGAGTT	38	NCTC8325intergenic_977455-978260~~~TCH1516intergenic_1071528-1072182~~~NCTC8325intergenic_2815019-2815472
1	n61593	1	1	589	0	1441	0	0	No	NA	NA	NA	NA	AATAAATTTTACGAAAATATCATTTCTGTCTCACTCCCTAATAACTGAGTTTTAATGAAGT	61	NCTC8325intergenic_977455-978260
1	n63687	2	2	589	0	1441	0	0	No	NA	NA	NA	NA	CCAAGAACTTTATGTCCCGGACTCTTTTTAA	31
1	n63896	1	1	589	0	1441	0	0	No	NA	NA	NA	NA	CTTCATTAAAACTCAGTTATTAGGGAGTGGACAGAAATGATATTTTCGTAAAATTTAT	58	NCTC8325intergenic_977455-978260
1	n63928	22	21	589	1	1441	0	0	No	NA	NA	NA	NA	CTTATCCAAGAACTTTATGTCCCGGACTCTC	31	USA300HOU_RS00175;DBGWAS_general_tag=IS5/IS1182_family_transposase
1	n64160	3	2	589	1	1441	0	0	No	NA	NA	NA	NA	TAAAAAGAGTCCGGGACATAAAGTTCTTGGA	31
1	n64574	528	528	589	0	1441	0	0	Yes	4.92E-04	2.65E-02	-0.0595	-3.61991	TCCCAGCCTATTCTTTTCATAAAAAAAAGACGGATTAATTATCCGTCTTTT	51
1	n64657	538	538	589	0	1441	0	0	Yes	8.47E-07	6.28E-05	-0.0975	-5.19744	AAAAAAAGACGGATTAATTATCCGTCTTTTTCTTATATC	39
1	n65545	1	1	589	0	1441	0	0	No	NA	NA	NA	NA	GATATAAGAAAAAGACGGATAATTAATCCGATAAAGTCCGTATAATTGTGTAAAAGT	57
1	n65552	538	538	589	0	1441	0	0	Yes	1.43E-06	1.03E-04	-0.0958	-5.07516	TAAATATTATAAAAAGATATAAGAAAAAGACGGATAATTAA	41	SAOUHSC_00111;DBGWAS_general_tag=hypothetical_protein
1	n66388	1	1	589	0	1441	0	0	No	NA	NA	NA	NA	ATTTTACGAAAATATCATTTCTGTCCCACTTCCTAATAACTGAGTTTTAATGAAGTCTTTT	61	NCTC8325intergenic_977455-978260
1	n66434	1	1	589	0	1441	0	0	No	NA	NA	NA	NA	TCAAATTAAATAGCTCAATAAAATATTGTATTTTTACATGTAAAAGAAAATGAATATATAC	61	TCH1516intergenic_756512-756724~~~NCTC8325intergenic_675684-675902
1	n67189	10	10	589	0	1441	0	0	No	NA	NA	NA	NA	AAAAGACGGATAATTAATCCGTCTTTTTTTATGAAAAGAATAGGCTGGGAAAT	53
1	n67203	539	539	589	0	1441	0	0	Yes	2.41E-07	1.93E-05	-0.105	-5.46351	AAAAGATATAAGAAAAAGACGGATAATTAATCCG	34	SAOUHSC_00111;DBGWAS_general_tag=hypothetical_protein
1	n70324	2028	587	589	1441	1441	0	0	No	NA	NA	NA	NA	CAGCAAAGCTGGCACAATACCAACACAAGTACCTAATATAAATATAAT	48	USA300HOU_RS13620;DBGWAS_general_tag=MFS_transporter~~~SAOUHSC_02818;DBGWAS_general_tag=hypothetical_protein
1	n73548	1	1	589	0	1441	0	0	No	NA	NA	NA	NA	TTAATTATCCGTCTTTTTCTTATATCTTTTATAATATTTAGCAAAGGTAATAATGA	56	USA300HOU_RS00785;DBGWAS_general_tag=hypothetical_protein~~~SAOUHSC_00111;DBGWAS_general_tag=hypothetical_protein
1	n77320	1	1	589	0	1441	0	0	No	NA	NA	NA	NA	GTAACGTATTCTCTTTCAACTCGCTACTTCACATACGCACTACGAATGACTAAAAGTTCAT	61	TCH1516intergenic_2672042-2672421~~~NCTC8325intergenic_2620534-2620913
1	n81681	1	1	589	0	1441	0	0	No	NA	NA	NA	NA	ACTTTTACACAATTATACGGACTTTATCGCGAATTTGGTATTAAAAGCTTTCGTTCAA	58	TCH1516intergenic_163504-163717~~~NCTC8325intergenic_108894-109107
1	n86880	2	0	589	2	1441	0	0	No	NA	NA	NA	NA	CTGGGACATTAATCGATCAAATGCTCCCTTAAAAGTAGACATTGAATAAATGAAGGCTTTG	61	NCTC8325intergenic_977455-978260~~~TCH1516intergenic_1071528-1072182
1	n86882	2015	576	589	1439	1441	0	0	No	NA	NA	NA	NA	GACATTAATCGATCAAATGCTCCCTTCAAAGTAGACATTGAATAA	45	NCTC8325intergenic_977455-978260~~~TCH1516intergenic_1071528-1072182~~~TCH1516intergenic_598451-598732~~~NCTC8325intergenic_534514-534795
1	n88492	2030	589	589	1441	1441	0	0	No	NA	NA	NA	NA	CCCACATCTTTTTAAAAGGTGTGGGCTTTATTATCATTAACCCAACTCACAGTGACGGGTTACGCAAGGTATTGAATTACC	81	TCH1516intergenic_2825185-2826032~~~NCTC8325intergenic_2773601-2774449
1	n91119	2016	577	589	1439	1441	0	0	No	NA	NA	NA	NA	AATGCTCCCTTCAAAGTAGACATTGAATAAATGA	34	NCTC8325intergenic_977455-978260~~~TCH1516intergenic_1071528-1072182
1	n91191	2	2	589	0	1441	0	0	No	NA	NA	NA	NA	TTATTCAATGTCTACTTTGAAGGGAGCATTAGATCGATTAATGTCCCAGATTTTTCTTGTT	61	NCTC8325intergenic_977455-978260~~~TCH1516intergenic_1071528-1072182
1	n92106	2021	580	589	1441	1441	0	0	No	NA	NA	NA	NA	AAGGGAGCATTTGATCGATTAATGTCCCAGATTTTTCT	38	NCTC8325intergenic_977455-978260~~~TCH1516intergenic_1071528-1072182
1	n93630	3	3	589	0	1441	0	0	No	NA	NA	NA	NA	CTATAACTAGCATGTCTTTAAATGAATATGATAAAGTCCGTATAATTGTGTAAA	54	TCH1516intergenic_756512-756724~~~NCTC8325intergenic_675684-675902
1	n95698	1	1	589	0	1441	0	0	No	NA	NA	NA	NA	ATGTACAAAAAATATAAATCAAATCGACATACTTATAAAACATCAGAACCACTAAAAACAA	61	USA300HOU_RS00785;DBGWAS_general_tag=hypothetical_protein~~~SAOUHSC_00111;DBGWAS_general_tag=hypothetical_protein
1	n96939	3	0	589	3	1441	0	0	No	NA	NA	NA	NA	TTGATAAGCGCCTATGTGATGGTAAATCATAACATAGGCGCTTTTTTTATAAGTTAAAAAT	61	TCH1516intergenic_2825185-2826032~~~NCTC8325intergenic_2773601-2774449
1	n97145	52	52	589	0	1441	0	0	No	NA	NA	NA	NA	GCTCTTTACAACACCGAGCGTGCCCGTACTAGGTAATTCAATACCTTGCGTAACCCGTCAC	61	TCH1516intergenic_2825185-2826032~~~NCTC8325intergenic_2773601-2774449
1	n97837	2019	580	589	1439	1441	0	0	No	NA	NA	NA	NA	CTGGGACATTAATCGATCAAATGCTCCCTTC	31	NCTC8325intergenic_977455-978260~~~TCH1516intergenic_1071528-1072182
1	n97944	1978	537	589	1441	1441	0	0	No	NA	NA	NA	NA	CCGTACTCGGTAATTCAATACCTTGCGTAACCCGTCAC	38	TCH1516intergenic_2825185-2826032~~~NCTC8325intergenic_2773601-2774449
1	n99234	1	0	589	1	1441	0	0	No	NA	NA	NA	NA	TTGCTAAATATTATAAAAAGAATAGGCTGGTAAATAAATCAATCTTCTATGATCTACGAAG	61	USA300HOU_RS00785;DBGWAS_general_tag=hypothetical_protein
1	n99235	1448	8	589	1440	1441	0	0	Yes	1.30E-113	9.38E-111	9.70E-01	-111.991	AAAAAGAATAGGCTGGGAAATAAATCAATCT	31	USA300HOU_RS00785;DBGWAS_general_tag=hypothetical_protein~~~NCTC8325intergenic_115214-116537
1	n99268	1	1	589	0	1441	0	0	No	NA	NA	NA	NA	TAAATATTATAAAAAGATATAAGAAAAAGAATAGGCTGGGAAATAAATCAATC	53	USA300HOU_RS00785;DBGWAS_general_tag=hypothetical_protein~~~SAOUHSC_00111;DBGWAS_general_tag=hypothetical_protein~~~NCTC8325intergenic_115214-116537
1	n100552	1630	190	589	1440	1441	0	0	No	5.48E-01	1.00E+00	-0.0167	0.600439	AAAAGAATAGGCTGGGAAATAAATCAATCTTCTATGATCTACGAA	45	USA300HOU_RS00785;DBGWAS_general_tag=hypothetical_protein~~~NCTC8325intergenic_115214-116537
1	n102040	1447	7	589	1440	1441	0	0	Yes	6.25E-165	1.59E-161	9.88E-01	-198.457	TTGCTAAATATTATAAAAAGAATAGGCTGGGAAATAAATCAATC	44	USA300HOU_RS00785;DBGWAS_general_tag=hypothetical_protein~~~NCTC8325intergenic_115214-116537
1	n102042	2018	582	589	1436	1441	0	0	No	NA	NA	NA	NA	CTTTTAACCCACATTAAATATTATTTTGCAATTGCAATGAATAACAAGAAAA	52	NCTC8325intergenic_977455-978260~~~TCH1516intergenic_1071528-1072182
1	n105688	1	1	589	0	1441	0	0	No	NA	NA	NA	NA	AGAATAAGTTGTCATCTAATTACAGGAAATTCGCATAAATTAGATGAAATGGAAAGTAATA	61	TCH1516intergenic_2825185-2826032~~~NCTC8325intergenic_2773601-2774449
1	n106657	1	1	589	0	1441	0	0	No	NA	NA	NA	NA	TTTTCGTTCAGTCAATTACTGCCAATATAAATTCGTAGATCATAGAAGATTGATTTATTTC	61	USA300HOU_RS00785;DBGWAS_general_tag=hypothetical_protein~~~NCTC8325intergenic_115214-116537
1	n107815	1	0	589	1	1441	0	0	No	NA	NA	NA	NA	GACTAGAATTGAAAAAAGCTTATTACAAGCACATTTTCGTTCAGTCAATTACTGCCAATAT	61	NCTC8325intergenic_115214-116537
1	n107884	1	0	589	1	1441	0	0	No	NA	NA	NA	NA	GACTAGAATTGAAAAAAGCTTATTACAAGCTCATTTTCGTTCAGTCAATTACTGCCAATAT	61	NCTC8325intergenic_115214-116537
1	n107929	2001	564	589	1437	1441	0	0	No	NA	NA	NA	NA	TACAAGCGCATTTTCGTTCAGTCAATTACTGCCAATAT	38	NCTC8325intergenic_115214-116537
1	n108087	2002	563	589	1439	1441	0	0	No	NA	NA	NA	NA	TCTACGAAGTTATATTGGCAGTAATTGACTGAACGAAAA	39	USA300HOU_RS00785;DBGWAS_general_tag=hypothetical_protein~~~NCTC8325intergenic_115214-116537
1	n108935	382	382	589	0	1441	0	0	No	6.73E-02	1.00E+00	3.48E-02	1.8295	CATAGAACATTGATTTATTTCCCAGCCTATTCTTTTCA	38	USA300HOU_RS00785;DBGWAS_general_tag=hypothetical_protein~~~NCTC8325intergenic_115214-116537
1	n108936	1	1	589	0	1441	0	0	No	NA	NA	NA	NA	AGCATAGAACATTGATTTATGTCCCAGCCTATTCTTTTCATAAAAAAAAGA	51	TCH1516intergenic_2580365-2580589~~~TCH1516intergenic_1470017-1470297~~~TCH1516intergenic_891806-892323~~~NCTC8325intergenic_2527319-2527926~~~NCTC8325intergenic_1375286-1375630~~~NCTC8325intergenic_811453-811871
1	n109882	18	18	589	0	1441	0	0	No	NA	NA	NA	NA	AATATTATTTCTGTCCCACTCCCTTTTATGAAAAGAATAGGCTGGGAAATAAA	53	NCTC8325intergenic_115214-116537
1	n112120	564	564	589	0	1441	0	0	Yes	2.19E-07	1.75E-05	-0.115	-5.63581	ATTGATTTATTTCCCAGCCTATTCTTTTCATAAAA	35	USA300HOU_RS00785;DBGWAS_general_tag=hypothetical_protein~~~NCTC8325intergenic_115214-116537
1	n112161	536	536	589	0	1441	0	0	Yes	6.61E-04	3.48E-02	-0.0604	-3.57334	ATTTCCCAGCCTATTCTTTTCATAAAAAAAAG	32
1	n112212	2003	564	589	1439	1441	0	0	No	NA	NA	NA	NA	CATTTTCGTTCAGTCAATTACTGCCAATATAA	32	NCTC8325intergenic_115214-116537
1	n112841	182	182	589	0	1441	0	0	No	NA	NA	NA	NA	AGATTGATTTATTTCCCAGCCTATTCTTTTCA	32	USA300HOU_RS00785;DBGWAS_general_tag=hypothetical_protein~~~NCTC8325intergenic_115214-116537
1	n113492	1	1	589	0	1441	0	0	No	NA	NA	NA	NA	TCCCAGCCTATTCTTTTCATAAAAAAAAGAGGCTGGGACATTAAGTTCTTAGGC	54
1	n113493	2	2	589	0	1441	0	0	No	NA	NA	NA	NA	CCCAGCCTATTCTTTTCATAAAAAAAAGGGAGTGGGACAGAAATAATATTTT	52
1	n113518	8	8	589	0	1441	0	0	No	NA	NA	NA	NA	CCCTTTTTTTTATGAAAAGAATAGGCTGGGAA	32
1	n114024	546	546	589	0	1441	0	0	Yes	5.74E-07	4.36E-05	-0.106	-5.38791	TTTATTTCCCAGCCTATTCTTTTCATAAAAAAA	33
1	n114110	528	528	589	0	1441	0	0	Yes	8.63E-04	4.41E-02	-0.056	-3.46185	TCTTTTTTTTATGAAAAGAATAGGCTGGGAA	31
1	n115103	2029	588	589	1441	1441	0	0	No	NA	NA	NA	NA	TGTAAATAAAAATTATATAAATTACCCACATCTTTTTAAAAGGTGTGGGCTTTA	54	TCH1516intergenic_2825185-2826032~~~NCTC8325intergenic_2773601-2774449
1	n118159	8	8	589	0	1441	0	0	No	NA	NA	NA	NA	AAATTAACTCAGGCTGGGACATAAATCAATGTTCTATG	38	TCH1516intergenic_2580365-2580589~~~TCH1516intergenic_1470017-1470297~~~TCH1516intergenic_891806-892323~~~NCTC8325intergenic_2527319-2527926~~~NCTC8325intergenic_1375286-1375630~~~NCTC8325intergenic_811453-811871~~~TCH1516intergenic_1380186-1380547~~~NCTC8325intergenic_1286269-1287160
1	n122491	2028	588	589	1440	1441	0	0	No	NA	NA	NA	NA	TTAAAAATGTAAATAAAAATTATATAAATTACCCACA	37	TCH1516intergenic_2825185-2826032~~~NCTC8325intergenic_2773601-2774449
1	n129199	2011	570	589	1441	1441	0	0	No	NA	NA	NA	NA	TACAAAAAATATAAATCAAATCGACATCCTTATAAAACATCAGAACCACTA	51	USA300HOU_RS00785;DBGWAS_general_tag=hypothetical_protein~~~SAOUHSC_00111;DBGWAS_general_tag=hypothetical_protein
1	n129893	1	1	589	0	1441	0	0	No	NA	NA	NA	NA	CAATTAAATATCAACAGGAATAACGAATAAATAAAAAGAGGTTGGGACATAAATCCCTAAAAA	63	TCH1516intergenic_>1443364-1443779~~~NCTC8325intergenic_1348844-1349855
1	n130149	1905	542	589	1363	1441	0	0	No	NA	NA	NA	NA	ATGAAAACAGGCTGGGACATAAATCAATGTTCTATGC	37	TCH1516intergenic_2580365-2580589~~~TCH1516intergenic_1470017-1470297~~~TCH1516intergenic_891806-892323~~~NCTC8325intergenic_2527319-2527926~~~NCTC8325intergenic_1375286-1375630~~~NCTC8325intergenic_811453-811871
1	n130822	7	0	589	7	1441	0	0	No	NA	NA	NA	NA	TTATTTTTAAAATTAGTAATAGTTAAAAAGGGAGTGGGACAGAAATAATATTT	53
1	n131255	1932	547	589	1385	1441	0	0	No	NA	NA	NA	NA	AAAAGAGGTTGGGACATAAATCCCTAAAAAA	31	TCH1516intergenic_>1443364-1443779~~~NCTC8325intergenic_1348844-1349855
1	n132300	379	379	589	0	1441	0	0	No	8.47E-02	1.00E+00	3.02E-02	1.72484	ATAGGCTGGGAAATAAATCAATGTTCTATGATCTACGAAGTTATATTGGCAGT	53	USA300HOU_RS00785;DBGWAS_general_tag=hypothetical_protein~~~NCTC8325intergenic_115214-116537
1	n132301	1	1	589	0	1441	0	0	No	NA	NA	NA	NA	TGGGAAATAAATCAATGTTCTATGCTCTACAAAGTT	36	USA300HOU_RS15240;DBGWAS_general_tag=hypothetical_protein~~~NCTC8325intergenic_977455-978260~~~USA300HOU_RS15110;DBGWAS_general_tag=hypothetical_protein~~~NCTC8325intergenic_603627-604015
1	n132302	3	3	589	0	1441	0	0	No	NA	NA	NA	NA	TGGGAAATAAATCAATGTTCTATGCTCTACGAAGTT	36	NCTC8325intergenic_2815019-2815472~~~TCH1516intergenic_2580365-2580589~~~TCH1516intergenic_891806-892323~~~NCTC8325intergenic_2527319-2527926~~~NCTC8325intergenic_811453-811871~~~TCH1516intergenic_2031793-2032023~~~NCTC8325intergenic_1978212-1978642~~~USA300HOU_RS15635;DBGWAS_general_tag=hypothetical_protein
1	n132368	2029	588	589	1441	1441	0	0	No	NA	NA	NA	NA	CTGGAAATTATAAATAATAGTTTAATATGGAATCAGAATTTGGAAATAAAAAGGGTGATAGATAATCAACAGCAAAATAA	80	TCH1516intergenic_2551420-2551507~~~NCTC8325intergenic_2498373-2498460
1	n132803	1630	189	589	1441	1441	0	0	No	6.14E-01	1.00E+00	-0.0143	0.504132	AAATAAATCAATCTTCTATGATCTACGAAGTTATATTGGCAGT	43	USA300HOU_RS00785;DBGWAS_general_tag=hypothetical_protein~~~NCTC8325intergenic_115214-116537
1	n132818	2029	588	589	1441	1441	0	0	No	NA	NA	NA	NA	ATAAATCAATGTTCTATGCTCTACAAAGTTATA	33	USA300HOU_RS15240;DBGWAS_general_tag=hypothetical_protein~~~NCTC8325intergenic_977455-978260~~~USA300HOU_RS15110;DBGWAS_general_tag=hypothetical_protein~~~NCTC8325intergenic_603627-604015
1	n132820	2030	589	589	1441	1441	0	0	No	NA	NA	NA	NA	ATAAATCAATGTTCTATGCTCTACGAAGTTATA	33	NCTC8325intergenic_2815019-2815472~~~TCH1516intergenic_2580365-2580589~~~TCH1516intergenic_891806-892323~~~NCTC8325intergenic_2527319-2527926~~~NCTC8325intergenic_811453-811871~~~TCH1516intergenic_2031793-2032023~~~NCTC8325intergenic_1978212-1978642~~~USA300HOU_RS15635;DBGWAS_general_tag=hypothetical_protein
1	n133988	1950	545	589	1405	1441	0	0	No	NA	NA	NA	NA	AAAGAGGTTGGGACATAAATCCCTAAAAAAA	31
1	n133989	3	2	589	1	1441	0	0	No	NA	NA	NA	NA	AAAGAGGTTGGGACATAAATCCCTAAAAAACAGC	34	TCH1516intergenic_1893139-1893485~~~NCTC8325intergenic_1794848-1796426~~~TCH1516intergenic_>1443364-1443779~~~NCTC8325intergenic_1348844-1349855
1	n134778	1	1	589	0	1441	0	0	No	NA	NA	NA	NA	GAGCATAGAACATTGATTTATGTCCCAGCCATGTCTCTTATACACATCT	49	TCH1516intergenic_2580365-2580589~~~TCH1516intergenic_1470017-1470297~~~TCH1516intergenic_891806-892323~~~NCTC8325intergenic_2527319-2527926~~~NCTC8325intergenic_1375286-1375630~~~NCTC8325intergenic_811453-811871
1	n134779	1	1	589	0	1441	0	0	No	NA	NA	NA	NA	GAGCATAGAACATTGATTTATGTCCCAGCCCGAAGATGATTTTTTTAGGAAGTATATTACA	61	TCH1516intergenic_2580365-2580589~~~TCH1516intergenic_1470017-1470297~~~TCH1516intergenic_891806-892323~~~NCTC8325intergenic_2527319-2527926~~~NCTC8325intergenic_1375286-1375630~~~NCTC8325intergenic_811453-811871
1	n135410	2030	589	589	1441	1441	0	0	No	NA	NA	NA	NA	AACTTCGTAGAGCATAGAACATTGATTTATG	31	NCTC8325intergenic_2815019-2815472~~~TCH1516intergenic_2580365-2580589~~~TCH1516intergenic_891806-892323~~~NCTC8325intergenic_2527319-2527926~~~NCTC8325intergenic_811453-811871~~~TCH1516intergenic_2031793-2032023~~~NCTC8325intergenic_1978212-1978642~~~USA300HOU_RS15635;DBGWAS_general_tag=hypothetical_protein
1	n135470	2029	588	589	1441	1441	0	0	No	NA	NA	NA	NA	AACTTTGTAGAGCATAGAACATTGATTTATGTCTCA	36	USA300HOU_RS15240;DBGWAS_general_tag=hypothetical_protein~~~NCTC8325intergenic_977455-978260~~~USA300HOU_RS15110;DBGWAS_general_tag=hypothetical_protein~~~NCTC8325intergenic_603627-604015
1	n136453	2027	587	589	1440	1441	0	0	No	NA	NA	NA	NA	AATCAATGTTCTATGCTCTACAAAGTTATAATGG	34	USA300HOU_RS15240;DBGWAS_general_tag=hypothetical_protein~~~NCTC8325intergenic_977455-978260~~~USA300HOU_RS15110;DBGWAS_general_tag=hypothetical_protein~~~NCTC8325intergenic_603627-604015
1	n136454	5	3	589	2	1441	0	0	No	NA	NA	NA	NA	AATCAATGTTCTATGCTCTACAAAGTTATATTGGCAGTAGT	41	USA300HOU_RS15240;DBGWAS_general_tag=hypothetical_protein~~~NCTC8325intergenic_977455-978260~~~USA300HOU_RS15110;DBGWAS_general_tag=hypothetical_protein~~~NCTC8325intergenic_720044-720394~~~NCTC8325intergenic_603627-604015~~~TCH1516intergenic_1098194-1098369~~~TCH1516intergenic_800992-801216~~~NCTC8325intergenic_1004122-1004297~~~TCH1516intergenic_2664765-2665202~~~NCTC8325intergenic_2613257-2613…
1	n136455	1	0	589	1	1441	0	0	No	NA	NA	NA	NA	AATCAATGTTCTATGCTCTACAAAGTTATAGTGGCAGTAGTTGACTGAACGAAAATTCGCT	61	USA300HOU_RS15240;DBGWAS_general_tag=hypothetical_protein~~~NCTC8325intergenic_977455-978260~~~USA300HOU_RS15110;DBGWAS_general_tag=hypothetical_protein~~~NCTC8325intergenic_603627-604015
1	n136456	1	0	589	1	1441	0	0	No	NA	NA	NA	NA	AATCAATGTTCTATGCTCTACGAAGTTATAATGGCAGTAGTT	42	NCTC8325intergenic_2815019-2815472~~~TCH1516intergenic_2580365-2580589~~~TCH1516intergenic_891806-892323~~~NCTC8325intergenic_2527319-2527926~~~NCTC8325intergenic_811453-811871~~~TCH1516intergenic_2031793-2032023~~~NCTC8325intergenic_1978212-1978642~~~USA300HOU_RS15635;DBGWAS_general_tag=hypothetical_protein
1	n136457	2030	589	589	1441	1441	0	0	No	NA	NA	NA	NA	AATCAATGTTCTATGCTCTACGAAGTTATAT	31	NCTC8325intergenic_2815019-2815472~~~TCH1516intergenic_2580365-2580589~~~TCH1516intergenic_891806-892323~~~NCTC8325intergenic_2527319-2527926~~~NCTC8325intergenic_811453-811871~~~TCH1516intergenic_2031793-2032023~~~NCTC8325intergenic_1978212-1978642~~~USA300HOU_RS15635;DBGWAS_general_tag=hypothetical_protein
1	n136716	52	0	589	52	1441	0	0	No	NA	NA	NA	NA	ATAAGTACTTGACTAATCGTAAGAAAAGAGGTTGGGACATAAATCCCTAAAAA	53	TCH1516intergenic_>1443364-1443779~~~NCTC8325intergenic_1348844-1349855
1	n136817	2001	562	589	1439	1441	0	0	No	NA	NA	NA	NA	AGTCAATTACTGCCAATATAACTTCGTAGATCATAGA	37	USA300HOU_RS00785;DBGWAS_general_tag=hypothetical_protein~~~NCTC8325intergenic_115214-116537
1	n136818	6	1	589	5	1441	0	0	No	NA	NA	NA	NA	AGTCAATTACTGCCAATATAACTTCGTAGAGCATAGA	37	USA300HOU_RS00785;DBGWAS_general_tag=hypothetical_protein~~~NCTC8325intergenic_2815019-2815472~~~NCTC8325intergenic_115214-116537~~~TCH1516intergenic_2580365-2580589~~~TCH1516intergenic_891806-892323~~~NCTC8325intergenic_2527319-2527926~~~NCTC8325intergenic_811453-811871~~~TCH1516intergenic_1380186-1380547~~~NCTC8325intergenic_1286269-1287160~~~TCH1516intergenic_2031793-2032023~~~NCTC8325intergen…
1	n137900	4	4	589	0	1441	0	0	No	NA	NA	NA	NA	AAGAGGTTGGGACATAAATCCCTAAAAAAAACAGCAG	37
1	n137901	1949	541	589	1408	1441	0	0	No	NA	NA	NA	NA	AAGAGGTTGGGACATAAATCCCTAAAAAAACAG	33
1	n138001	2	1	589	1	1441	0	0	No	NA	NA	NA	NA	CAAGCTGGGACATAAATCAATGTTCTATGCTCT	33	TCH1516intergenic_2580365-2580589~~~TCH1516intergenic_1470017-1470297~~~TCH1516intergenic_891806-892323~~~NCTC8325intergenic_2527319-2527926~~~NCTC8325intergenic_1375286-1375630~~~NCTC8325intergenic_811453-811871
1	n139498	1448	7	589	1441	1441	0	0	Yes	4.96E-224	1.39E-219	9.95E-01	-345.766	TTATTACCTTTGCTAAATATTATAAAAAGAATAGGCTGG	39	USA300HOU_RS00785;DBGWAS_general_tag=hypothetical_protein~~~SAOUHSC_00111;DBGWAS_general_tag=hypothetical_protein
1	n139499	557	557	589	0	1441	0	0	Yes	9.81E-18	1.55E-15	-0.173	-9.01031	TATTACCTTTGCTAAATATTATAAAAAGATATAAGA	36	USA300HOU_RS00785;DBGWAS_general_tag=hypothetical_protein~~~SAOUHSC_00111;DBGWAS_general_tag=hypothetical_protein
1	n139693	8	6	589	2	1441	0	0	No	NA	NA	NA	NA	AGTCAACTACTGCCAATATAACTTCGTAGATCATAGA	37	USA300HOU_RS00785;DBGWAS_general_tag=hypothetical_protein~~~NCTC8325intergenic_2815019-2815472~~~NCTC8325intergenic_115214-116537~~~TCH1516intergenic_2580365-2580589~~~TCH1516intergenic_891806-892323~~~NCTC8325intergenic_2527319-2527926~~~NCTC8325intergenic_811453-811871~~~TCH1516intergenic_1380186-1380547~~~NCTC8325intergenic_1286269-1287160~~~TCH1516intergenic_2031793-2032023~~~NCTC8325intergen…
1	n139727	1	1	589	0	1441	0	0	No	NA	NA	NA	NA	ATTTATATTTTTTGTACATTATTAATATCACTATTACCTTTGCTAAATATTATAAAAAGAT	61	USA300HOU_RS00785;DBGWAS_general_tag=hypothetical_protein~~~SAOUHSC_00111;DBGWAS_general_tag=hypothetical_protein
1	n140332	1	1	589	0	1441	0	0	No	NA	NA	NA	NA	TTCTACAAACCTACGAGATGCATAAAACCCGATAAAGTCCGTATAATTGTGTAAAAGT	58	TCH1516intergenic_1179209-1179516~~~NCTC8325intergenic_1085307-1085614
1	n140899	2006	565	589	1441	1441	0	0	No	NA	NA	NA	NA	ATTATTAATATCATTATTACCTTTGCTAAATATTATAAAA	40	USA300HOU_RS00785;DBGWAS_general_tag=hypothetical_protein~~~SAOUHSC_00111;DBGWAS_general_tag=hypothetical_protein
1	n141148	1980	573	589	1407	1441	0	0	No	NA	NA	NA	NA	CATAGAACATTGATTTATGTCCCAGCCTGAAGAT	34	TCH1516intergenic_2580365-2580589~~~TCH1516intergenic_1470017-1470297~~~TCH1516intergenic_891806-892323~~~NCTC8325intergenic_2527319-2527926~~~NCTC8325intergenic_1375286-1375630~~~NCTC8325intergenic_811453-811871
1	n141149	2018	580	589	1438	1441	0	0	No	NA	NA	NA	NA	CATAGAACATTGATTTATGTCCCAGCCTGATC	32	TCH1516intergenic_2580365-2580589~~~TCH1516intergenic_1470017-1470297~~~TCH1516intergenic_891806-892323~~~NCTC8325intergenic_2527319-2527926~~~NCTC8325intergenic_1375286-1375630~~~NCTC8325intergenic_811453-811871
1	n141262	4	4	589	0	1441	0	0	No	NA	NA	NA	NA	ATAGGCTGGGAAATAAATCAATGTTCTATGCTCTAC	36	NCTC8325intergenic_115214-116537
1	n141576	556	556	589	0	1441	0	0	Yes	9.67E-17	1.51E-14	-0.163	-8.72623	ATCTTTTTATAATATTTAGCAAAGGTAATAA	31	USA300HOU_RS00785;DBGWAS_general_tag=hypothetical_protein~~~SAOUHSC_00111;DBGWAS_general_tag=hypothetical_protein
1	n141750	2004	563	589	1441	1441	0	0	No	NA	NA	NA	NA	TCATTATTACCTTTGCTAAATATTATAAAAAGA	33	USA300HOU_RS00785;DBGWAS_general_tag=hypothetical_protein~~~SAOUHSC_00111;DBGWAS_general_tag=hypothetical_protein
1	n142400	2010	570	589	1440	1441	0	0	No	NA	NA	NA	NA	ATGTACAAAAAATATAAATCAAATCGACATCCT	33	USA300HOU_RS00785;DBGWAS_general_tag=hypothetical_protein~~~SAOUHSC_00111;DBGWAS_general_tag=hypothetical_protein
1	n142625	2029	589	589	1440	1441	0	0	No	NA	NA	NA	NA	AGAGCATAGAACATTGATTTATGTCCCAGCC	31	TCH1516intergenic_2580365-2580589~~~TCH1516intergenic_1470017-1470297~~~TCH1516intergenic_891806-892323~~~NCTC8325intergenic_2527319-2527926~~~NCTC8325intergenic_1375286-1375630~~~NCTC8325intergenic_811453-811871
1	n142668	2030	589	589	1441	1441	0	0	No	NA	NA	NA	NA	AGCATAGAACATTGATTTATGTCCCAGCCTG	31	TCH1516intergenic_2580365-2580589~~~TCH1516intergenic_1470017-1470297~~~TCH1516intergenic_891806-892323~~~NCTC8325intergenic_2527319-2527926~~~NCTC8325intergenic_1375286-1375630~~~NCTC8325intergenic_811453-811871
1	n142921	2029	589	589	1440	1441	0	0	No	NA	NA	NA	NA	AGGCTGGGACATAAATCAATGTTCTATGCTC	31	TCH1516intergenic_2580365-2580589~~~TCH1516intergenic_1470017-1470297~~~TCH1516intergenic_891806-892323~~~NCTC8325intergenic_2527319-2527926~~~NCTC8325intergenic_1375286-1375630~~~NCTC8325intergenic_811453-811871
1	n143485	538	538	589	0	1441	0	0	Yes	5.35E-16	8.02E-14	-0.155	-8.46078	TCTTTTTCTTATATCTTTTTATAATATTTAGCAAAG	36	SAOUHSC_00111;DBGWAS_general_tag=hypothetical_protein
1	n143554	2025	588	589	1437	1441	0	0	No	NA	NA	NA	NA	CTGGGACATAAATCAATGTTCTATGCTCTAC	31	TCH1516intergenic_2580365-2580589~~~TCH1516intergenic_1470017-1470297~~~TCH1516intergenic_891806-892323~~~NCTC8325intergenic_2527319-2527926~~~NCTC8325intergenic_1375286-1375630~~~NCTC8325intergenic_811453-811871~~~TCH1516intergenic_2031793-2032023~~~NCTC8325intergenic_1978212-1978642
1	n143556	1935	496	589	1439	1441	0	0	No	NA	NA	NA	NA	CGAAAATATCATTTCTGTCCCACCTCACTCAA	32	NCTC8325intergenic_775477-776118
1	n143654	1879	546	589	1333	1441	0	0	No	NA	NA	NA	NA	TAAAAGAGGTTGGGACATAAATCCCTAAAAA	31	TCH1516intergenic_>1443364-1443779~~~NCTC8325intergenic_1348844-1349855
1	n143712	2009	568	589	1441	1441	0	0	No	NA	NA	NA	NA	TACTGCCAATATAACTTCGTAGATCATAGAA	31	USA300HOU_RS00785;DBGWAS_general_tag=hypothetical_protein~~~NCTC8325intergenic_115214-116537
1	n143715	9	9	589	0	1441	0	0	No	NA	NA	NA	NA	CTTTTACACAATTATACGGACTTTATCGGTTCGTTTACATATTTCCCCAATATAAT	56	TCH1516intergenic_2267945-2268649~~~NCTC8325intergenic_2214417-2215121
1	n143761	2026	589	589	1437	1441	0	0	No	NA	NA	NA	NA	TAGAGCATAGAACATTGATTTATGTCCCAGC	31	TCH1516intergenic_2580365-2580589~~~TCH1516intergenic_1470017-1470297~~~TCH1516intergenic_891806-892323~~~NCTC8325intergenic_2527319-2527926~~~NCTC8325intergenic_1375286-1375630~~~NCTC8325intergenic_811453-811871~~~TCH1516intergenic_2031793-2032023~~~NCTC8325intergenic_1978212-1978642
1	n143796	2030	589	589	1441	1441	0	0	No	NA	NA	NA	NA	TCAGGCTGGGACATAAATCAATGTTCTATGC	31	TCH1516intergenic_2580365-2580589~~~TCH1516intergenic_1470017-1470297~~~TCH1516intergenic_891806-892323~~~NCTC8325intergenic_2527319-2527926~~~NCTC8325intergenic_1375286-1375630~~~NCTC8325intergenic_811453-811871
1	n143929	2	0	589	2	1441	0	0	No	NA	NA	NA	NA	TTTTTTTAGGGATTTATGTCCCAACCTCTTCTTACGATTAGTCAAGTACTTATA	54
1	n151116	1989	561	589	1428	1441	0	0	No	NA	NA	NA	NA	AATTAGAGTAAGAGGCTGGGACATAAATCCC	31	TCH1516intergenic_318637-318882~~~NCTC8325intergenic_264152-264824
1	n151117	1	1	589	0	1441	0	0	No	NA	NA	NA	NA	TAATTAGAGTAAGAGGCTGGGACATAAATCTCTAAAAAACAGCAGTAAGATAATTTTCAAT	61	TCH1516intergenic_1804712-1805352~~~NCTC8325intergenic_1705641-1707965~~~TCH1516intergenic_2478113-2478687~~~TCH1516intergenic_2071731-2072077~~~NCTC8325intergenic_2018124-2018696~~~TCH1516intergenic_318637-318882~~~NCTC8325intergenic_264152-264824~~~TCH1516intergenic_2317347-2317802~~~TCH1516intergenic_1893139-1893485~~~NCTC8325intergenic_2263981-2266096~~~NCTC8325intergenic_1794848-1796426~~~TC…
1	n153561	1	0	589	1	1441	0	0	No	NA	NA	NA	NA	CCCTAACAACCTGAGGTCACTACGCTTCCATTCGCCTGCGCTTTAGCGCATGCATAAAAG	60	TCH1516intergenic_2504696-2505099~~~NCTC8325intergenic_2451645-2452048
1	n153564	1	0	589	1	1441	0	0	No	NA	NA	NA	NA	CCCCTAACAACCTGAGGTCACTACGCTTCGTTTCGCCTGCGCTTTAGCGCATGCATAAAAG	61	TCH1516intergenic_2504696-2505099~~~NCTC8325intergenic_2451645-2452048
1	n153830	1	1	589	0	1441	0	0	No	NA	NA	NA	NA	TACTGCTGTTTTTTTTAGGGATTAATGTCCAGACTCTTTAGTTTATTATTTTCAATATAACAATTGTCTAATCAA	75	TCH1516intergenic_2478113-2478687~~~NCTC8325intergenic_2425060-2426130
1	n154273	1	1	589	0	1441	0	0	No	NA	NA	NA	NA	ATTAATAATGTACAAAAAATATAAATCAAAACGACATCCTTATAAAACATCAGAACCACTA	61	USA300HOU_RS00785;DBGWAS_general_tag=hypothetical_protein~~~SAOUHSC_00111;DBGWAS_general_tag=hypothetical_protein
1	n154559	2011	571	589	1440	1441	0	0	No	NA	NA	NA	NA	CTTATAAAACATCAGAACCACTAAAAACAAAAAAG	35
1	n154620	2000	572	589	1428	1441	0	0	No	NA	NA	NA	NA	ATAATTAGAGTAAGAGGCTGGGACATAAATC	31	TCH1516intergenic_318637-318882~~~NCTC8325intergenic_264152-264824
1	n155550	2028	587	589	1441	1441	0	0	No	NA	NA	NA	NA	CTTATCAATAAATTATTACTTATTACTTTCCATTTCATCTAATTTATG	48	TCH1516intergenic_2825185-2826032~~~NCTC8325intergenic_2773601-2774449
1	n155551	1	1	589	0	1441	0	0	No	NA	NA	NA	NA	CTTATCAATAAATTATTACTTATTACTTTCTATTTCATCTAATTTATGCGGATTTCCTGTA	61	TCH1516intergenic_2825185-2826032~~~NCTC8325intergenic_2773601-2774449
1	n156155	1892	464	589	1428	1441	0	0	No	NA	NA	NA	NA	CTCTTATGCATGCGCTTAGCGCAGGCGCTCCTACTTTTAAA	41	TCH1516intergenic_2265137-2265636
1	n157286	2010	570	589	1440	1441	0	0	No	NA	NA	NA	NA	CGACATCCTTATAAAACATCAGAACCACTAAAAACAA	37	USA300HOU_RS00785;DBGWAS_general_tag=hypothetical_protein~~~SAOUHSC_00111;DBGWAS_general_tag=hypothetical_protein
1	n162843	2015	584	589	1431	1441	0	0	No	NA	NA	NA	NA	CAACCTTGCTGGGGTGGGACGACGAAATAAAT	32	NCTC8325intergenic_2815019-2815472~~~USA300HOU_RS15635;DBGWAS_general_tag=hypothetical_protein
1	n163335	2028	588	589	1440	1441	0	0	No	NA	NA	NA	NA	GTAACGTATTCTCTTTCAACTCGCTACTTCGCATAC	36	TCH1516intergenic_2672042-2672421~~~NCTC8325intergenic_2620534-2620913
1	n165528	2029	589	589	1440	1441	0	0	No	NA	NA	NA	NA	GAAGTAGCGAGTTGAAAGAGAATACGTTACAAAAG	35	TCH1516intergenic_2672042-2672421~~~NCTC8325intergenic_2620534-2620913
1	n167743	4	4	589	0	1441	0	0	No	NA	NA	NA	NA	TGTACATTATTAATATCATTATTACCTTTGATAAATATTATAAAAAGATATAAGAAAAAGA	61	USA300HOU_RS00785;DBGWAS_general_tag=hypothetical_protein~~~SAOUHSC_00111;DBGWAS_general_tag=hypothetical_protein
1	n169007	1	0	589	1	1441	0	0	No	NA	NA	NA	NA	TTATATAATTTTTATTTACATTTTTAACTTGTAAAAAAAGCGCCTATGTCATGATTTACCA	61	TCH1516intergenic_2825185-2826032~~~NCTC8325intergenic_2773601-2774449
1	n169034	1	0	589	1	1441	0	0	No	NA	NA	NA	NA	TCGTAAAATTTATTTCGTCGTCCTACCCCAACTTGCATTGTCTGTAGAA	49	USA300HOU_RS15255;DBGWAS_general_tag=hypothetical_protein~~~SAOUHSC_01118;DBGWAS_general_tag=hypothetical_protein
1	n170462	3	3	589	0	1441	0	0	No	NA	NA	NA	NA	CTCTTTTTCTTATATCTTTTTATAATATTTA	31	SAOUHSC_00111;DBGWAS_general_tag=hypothetical_protein
1	n171033	9	7	589	2	1441	0	0	No	NA	NA	NA	NA	AATCCCTAAAAAAAAACAGCAGTAAGATAATTTTCAAT	38
1	n171040	81	81	589	0	1441	0	0	No	NA	NA	NA	NA	GACATTAATCCCTAAAAAAAACAGCAGTAAAATAATTTTCAATT	44
1	n171041	1776	469	589	1307	1441	0	0	Yes	4.27E-04	2.35E-02	2.92E-02	-3.52718	AAAAAAAACAGCAGTAAGATAATTTTCAATT	31
1	n171065	82	82	589	0	1441	0	0	No	NA	NA	NA	NA	AAAAAAACAGCAGTAAAATAATTTTCAATTAGAAAATATCTTACTGC	47	TCH1516intergenic_1804712-1805352~~~NCTC8325intergenic_1705641-1707965~~~TCH1516intergenic_2478113-2478687~~~NCTC8325intergenic_2425060-2426130~~~TCH1516intergenic_2071731-2072077~~~NCTC8325intergenic_2018124-2018696~~~TCH1516intergenic_318637-318882~~~NCTC8325intergenic_264152-264824~~~TCH1516intergenic_2317347-2317802~~~TCH1516intergenic_1893139-1893485~~~NCTC8325intergenic_2263981-2266096~~~NC…
1	n171066	2030	589	589	1441	1441	0	0	No	NA	NA	NA	NA	AAAAAAACAGCAGTAAGATAATTTTCAATTA	31
1	n171067	1	1	589	0	1441	0	0	No	NA	NA	NA	NA	TAAAAAAACAGCAGTAAGATAATTTTCAATGAGAAAATATCTTACTGCTGTTCTCTATTTA	61	TCH1516intergenic_1804712-1805352~~~NCTC8325intergenic_1705641-1707965~~~TCH1516intergenic_2478113-2478687~~~NCTC8325intergenic_2425060-2426130~~~TCH1516intergenic_2071731-2072077~~~NCTC8325intergenic_2018124-2018696~~~TCH1516intergenic_318637-318882~~~NCTC8325intergenic_264152-264824~~~TCH1516intergenic_2317347-2317802~~~TCH1516intergenic_1893139-1893485~~~NCTC8325intergenic_2263981-2266096~~~NC…
1	n171068	1	1	589	0	1441	0	0	No	NA	NA	NA	NA	ATCCCTAAAAAAACAGCAGTAAGATAATTTGCCAAACTTGCACATAAATGTTTAATT	57	TCH1516intergenic_2317347-2317802~~~NCTC8325intergenic_2263981-2266096
1	n171158	2030	589	589	1441	1441	0	0	No	NA	NA	NA	NA	AAAAAACAGCAGTAAGATAATTTTCAATTAG	31	TCH1516intergenic_1804712-1805352~~~NCTC8325intergenic_1705641-1707965~~~TCH1516intergenic_2478113-2478687~~~TCH1516intergenic_2071731-2072077~~~NCTC8325intergenic_2018124-2018696~~~TCH1516intergenic_318637-318882~~~NCTC8325intergenic_264152-264824~~~TCH1516intergenic_2317347-2317802~~~TCH1516intergenic_1893139-1893485~~~NCTC8325intergenic_2263981-2266096~~~NCTC8325intergenic_1794848-1796426~~~TC…
1	n171428	2030	589	589	1441	1441	0	0	No	NA	NA	NA	NA	AAAAACAGCAGTAAGATAATTTTCAATTAGAAA	33	TCH1516intergenic_1804712-1805352~~~NCTC8325intergenic_1705641-1707965~~~TCH1516intergenic_2478113-2478687~~~TCH1516intergenic_2071731-2072077~~~NCTC8325intergenic_2018124-2018696~~~TCH1516intergenic_318637-318882~~~NCTC8325intergenic_264152-264824~~~TCH1516intergenic_2317347-2317802~~~TCH1516intergenic_1893139-1893485~~~NCTC8325intergenic_2263981-2266096~~~NCTC8325intergenic_1794848-1796426~~~TC…
1	n172225	1	0	589	1	1441	0	0	No	NA	NA	NA	NA	CAAAATAATATTTAATGTGGGTTAAAAGACCTTATTAAAACTCAGTTATTAGGGAGTGGGA	61	NCTC8325intergenic_977455-978260~~~TCH1516intergenic_1071528-1072182
1	n172226	2003	573	589	1430	1441	0	0	No	NA	NA	NA	NA	CAAAATAATATTTAATGTGGGTTAAAAGACTT	32	NCTC8325intergenic_977455-978260~~~TCH1516intergenic_1071528-1072182
1	n172227	5	0	589	5	1441	0	0	No	NA	NA	NA	NA	GCAAAATAATATTTAATGTGGGTTAAAAGATTTTATTAAAACTCAGTTATTAGGGAGTGGG	61	NCTC8325intergenic_977455-978260~~~TCH1516intergenic_1071528-1072182
1	n172228	9	9	589	0	1441	0	0	No	NA	NA	NA	NA	TGCAAAATAATATTTAATGTGGGTTAAAAGCCTTCATTAAAACTCAGTTATTAGGGAGTGG	61	NCTC8325intergenic_977455-978260~~~TCH1516intergenic_1071528-1072182
1	n172336	1	0	589	1	1441	0	0	No	NA	NA	NA	NA	AGAAAATATCTTACTGCTGTTCTCTATTTAATAAAATAAATTTTCTGTGTTGGGTCCCT	59	TCH1516intergenic_1804712-1805352~~~NCTC8325intergenic_1705641-1707965~~~TCH1516intergenic_2478113-2478687~~~NCTC8325intergenic_2425060-2426130~~~TCH1516intergenic_2071731-2072077~~~NCTC8325intergenic_2018124-2018696~~~TCH1516intergenic_318637-318882~~~NCTC8325intergenic_264152-264824~~~TCH1516intergenic_2317347-2317802~~~TCH1516intergenic_1893139-1893485~~~NCTC8325intergenic_2263981-2266096~~~NC…
1	n172569	1	0	589	1	1441	0	0	No	NA	NA	NA	NA	CTAATTGAAAATTATCTTACTGCTGTTTTTAGGATTTATGTCCCA	45	TCH1516intergenic_1804712-1805352~~~NCTC8325intergenic_1705641-1707965~~~TCH1516intergenic_2478113-2478687~~~TCH1516intergenic_2071731-2072077~~~NCTC8325intergenic_2018124-2018696~~~TCH1516intergenic_318637-318882~~~NCTC8325intergenic_264152-264824~~~TCH1516intergenic_2317347-2317802~~~TCH1516intergenic_1893139-1893485~~~NCTC8325intergenic_2263981-2266096~~~NCTC8325intergenic_1794848-1796426~~~TC…
1	n172572	2024	587	589	1437	1441	0	0	No	NA	NA	NA	NA	ATTGAAAATTATCTTACTGCTGTTTTTTTAGGGAT	35
1	n172573	1770	465	589	1305	1441	0	0	Yes	5.82E-04	3.09E-02	2.84E-02	-3.4442	ATTGAAAATTATCTTACTGCTGTTTTTTTTAGGGATT	37
1	n172574	3	3	589	0	1441	0	0	No	NA	NA	NA	NA	AATTGAAAATTATCTTACTGCTGTTTTTTTGTAAAAAGAAAACCATACGCTA	52
1	n172575	1	1	589	0	1441	0	0	No	NA	NA	NA	NA	AATTGAAAATTATCTTACTGCTGTTTTTTGTAAAAAGAAAACCATACGCTA	51	TCH1516intergenic_1804712-1805352~~~NCTC8325intergenic_1705641-1707965~~~TCH1516intergenic_2478113-2478687~~~TCH1516intergenic_2071731-2072077~~~NCTC8325intergenic_2018124-2018696~~~TCH1516intergenic_318637-318882~~~NCTC8325intergenic_264152-264824~~~TCH1516intergenic_2317347-2317802~~~TCH1516intergenic_1893139-1893485~~~NCTC8325intergenic_2263981-2266096~~~NCTC8325intergenic_1794848-1796426~~~TC…
1	n172576	1	1	589	0	1441	0	0	No	NA	NA	NA	NA	AATTGAAAATTATCTTACTGCTGTTTTTTGGGGATTTATGTCCCAGCCTCTTACTCTAAT	60	TCH1516intergenic_1804712-1805352~~~NCTC8325intergenic_1705641-1707965~~~TCH1516intergenic_2478113-2478687~~~TCH1516intergenic_2071731-2072077~~~NCTC8325intergenic_2018124-2018696~~~TCH1516intergenic_318637-318882~~~NCTC8325intergenic_264152-264824~~~TCH1516intergenic_2317347-2317802~~~TCH1516intergenic_1893139-1893485~~~NCTC8325intergenic_2263981-2266096~~~NCTC8325intergenic_1794848-1796426~~~TC…
1	n172734	1	0	589	1	1441	0	0	No	NA	NA	NA	NA	TTTTCTTGTTATTCATTGCAATTGCAAAATGATATTTAATGTGGGTTAAAAGACTTTATTA	61	NCTC8325intergenic_977455-978260~~~TCH1516intergenic_1071528-1072182
1	n173214	2001	562	589	1439	1441	0	0	No	NA	NA	NA	NA	GAAACACTAATAAATGTCCTATAGTTTACAATATT	35	USA300HOU_RS15360;DBGWAS_general_tag=hypothetical_protein~~~NCTC8325intergenic_1776134-1776997
1	n173455	2001	562	589	1439	1441	0	0	No	NA	NA	NA	NA	TGTAAACTATAGGACATTTATTAGTGTTTCAGGTTCTTTATCG	43	USA300HOU_RS15360;DBGWAS_general_tag=hypothetical_protein~~~NCTC8325intergenic_1776134-1776997
1	n173456	1	0	589	1	1441	0	0	No	NA	NA	NA	NA	TGTAAACTATAGGACATTTATTAGTGTTTCGGACAGAAATGATATTTTCGTAAAATTTAT	60	USA300HOU_RS15360;DBGWAS_general_tag=hypothetical_protein~~~NCTC8325intergenic_1776134-1776997~~~NCTC8325intergenic_977455-978260
1	n173750	565	565	589	0	1441	0	0	Yes	3.93E-14	5.32E-12	-0.184	-8.50488	AAATAATATTTAATGTGGGTTAAAAGACTTCATTAAAACTCAGTTATTA	49	NCTC8325intergenic_977455-978260~~~TCH1516intergenic_1071528-1072182
1	n173751	1438	8	589	1430	1441	0	0	Yes	2.43E-12	2.93E-10	1.88E-01	-8.23788	AAATAATATTTAATGTGGGTTAAAAGACTTTATTA	35	NCTC8325intergenic_977455-978260~~~TCH1516intergenic_1071528-1072182
1	n174184	3	3	589	0	1441	0	0	No	NA	NA	NA	NA	ACAGGCTGGGACATAAATCCCTAAAAAAAAACAGCAGTAAGATAA	45
1	n174185	21	21	589	0	1441	0	0	No	NA	NA	NA	NA	TGGGACATAAATCCCTAAAAAAAACAGCAGTAAGATAAT	39
1	n174186	2024	587	589	1437	1441	0	0	No	NA	NA	NA	NA	ATAAATCCCTAAAAAAACAGCAGTAAGATAATT	33
1	n174361	2023	583	589	1440	1441	0	0	No	NA	NA	NA	NA	TAAATTATATTGGGGAAATATGTAAACGAACCG	33	TCH1516intergenic_2267945-2268649~~~NCTC8325intergenic_2214417-2215121
1	n174368	2024	587	589	1437	1441	0	0	No	NA	NA	NA	NA	AAATTATCTTACTGCTGTTTTTTTAGGGATT	31
1	n175767	2	1	589	1	1441	0	0	No	NA	NA	NA	NA	AACAGCAGTAAGATAATTTCTAATTGAAAATTAT	34
1	n175768	2029	589	589	1440	1441	0	0	No	NA	NA	NA	NA	AACAGCAGTAAGATAATTTTCAATTAGAAAAT	32	TCH1516intergenic_1804712-1805352~~~NCTC8325intergenic_1705641-1707965~~~TCH1516intergenic_2478113-2478687~~~TCH1516intergenic_2071731-2072077~~~NCTC8325intergenic_2018124-2018696~~~TCH1516intergenic_318637-318882~~~NCTC8325intergenic_264152-264824~~~TCH1516intergenic_2317347-2317802~~~TCH1516intergenic_1893139-1893485~~~NCTC8325intergenic_2263981-2266096~~~NCTC8325intergenic_1794848-1796426~~~TC…
[truncated: 7,002 more rows]
