# Supplementary material for: Interpreting roles of mutations associated with the emergence of S. aureus USA300 strains using transcriptional regulatory network reconstruction
Source: bioRxiv preprint, doi:10.1101/2023.07.26.550757, version 2 (2024-05-15)
Supplement: Supplementary Table 5 [file 550757_file06.xlsx]

## Sheet: PVL
# Results of BLASTing PVL genes against all genomes used in DBGWAS.
qseqid	sseqid	pident	length	mismatch	gapopen	qstart	qend	sstart	send	evalue	bitscore	subject fna file
USA300HOU_RS07645|lukF	JEVQ01000003	100	984	0	0	1	984	117468	116485	0	1818	1417207_3.fna
USA300HOU_RS07645|lukF	JEVQ01000006	82.3	972	166	6	7	975	46088	45120	0	837	1417207_3.fna
USA300HOU_RS07645|lukF	JEVQ01000001	77.03	962	191	25	7	953	365254	366200	2e-149	525	1417207_3.fna
USA300HOU_RS07650|lukS	JEVQ01000003	100	939	0	0	1	939	118402	117464	0	1735	1417207_3.fna
USA300HOU_RS07650|lukS	JEVQ01000001	75.74	643	138	16	169	803	362974	363606	6e-84	307	1417207_3.fna
USA300HOU_RS07645|lukF	FGEW01000013	82.2	972	166	7	7	975	37287	38254	0	830	1280_6000.fna
USA300HOU_RS07645|lukF	FGEW01000002	77.03	962	191	26	7	953	79218	78272	2e-149	525	1280_6000.fna
USA300HOU_RS07650|lukS	FGEW01000002	75.74	643	138	16	169	803	81499	80867	6e-84	307	1280_6000.fna
USA300HOU_RS07645|lukF	NDNB01000021	100	984	0	0	1	984	1049	2032	0	1818	1280_12389.fna
USA300HOU_RS07645|lukF	NDNB01000018	82.3	972	166	6	7	975	15011	15979	0	837	1280_12389.fna
USA300HOU_RS07645|lukF	NDNB01000023	77.03	962	191	26	7	953	79136	78190	2e-149	525	1280_12389.fna
USA300HOU_RS07650|lukS	NDNB01000021	100	939	0	0	1	939	115	1053	0	1735	1280_12389.fna
USA300HOU_RS07650|lukS	NDNB01000023	75.74	643	138	16	169	803	81416	80784	6e-84	307	1280_12389.fna
USA300HOU_RS07645|lukF	JDIE01000002	100	984	0	0	1	984	712542	711559	0	1818	1410726_3.fna
USA300HOU_RS07645|lukF	JDIE01000015	82.3	972	166	6	7	975	19491	18523	0	837	1410726_3.fna
USA300HOU_RS07645|lukF	JDIE01000003	77.03	962	191	25	7	953	225778	226724	2e-149	525	1410726_3.fna
USA300HOU_RS07650|lukS	JDIE01000002	100	939	0	0	1	939	713476	712538	0	1735	1410726_3.fna
USA300HOU_RS07650|lukS	JDIE01000003	75.74	643	138	16	169	803	223498	224130	6e-84	307	1410726_3.fna
USA300HOU_RS07645|lukF	JGNH01000009	100	984	0	0	1	984	117525	116542	0	1818	1418436_3.fna
USA300HOU_RS07645|lukF	JGNH01000013	82.3	972	166	6	7	975	38752	37784	0	837	1418436_3.fna
USA300HOU_RS07645|lukF	JGNH01000003	77.03	962	191	25	7	953	66156	67102	2e-149	525	1418436_3.fna
USA300HOU_RS07650|lukS	JGNH01000009	100	939	0	0	1	939	118459	117521	0	1735	1418436_3.fna
USA300HOU_RS07650|lukS	JGNH01000003	75.74	643	138	16	169	803	63876	64508	6e-84	307	1418436_3.fna
USA300HOU_RS07645|lukF	1280.10022.con.0022	82.1	972	168	6	7	975	14491	13523	0	826	1280_10022.fna
USA300HOU_RS07645|lukF	1280.10022.con.0006	77.03	962	191	25	7	953	66056	67002	2e-149	525	1280_10022.fna
USA300HOU_RS07650|lukS	1280.10022.con.0006	75.74	643	138	16	169	803	63775	64407	6e-84	307	1280_10022.fna
USA300HOU_RS07645|lukF	CYLZ01000002	100	984	0	0	1	984	242963	243946	0	1818	1280_4364.contig
USA300HOU_RS07645|lukF	CYLZ01000011	82.3	972	166	6	7	975	18430	17462	0	837	1280_4364.contig
USA300HOU_RS07645|lukF	CYLZ01000006	77.03	962	191	26	7	953	79650	78704	2e-149	525	1280_4364.contig
USA300HOU_RS07650|lukS	CYLZ01000002	100	939	0	0	1	939	242029	242967	0	1735	1280_4364.contig
USA300HOU_RS07650|lukS	CYLZ01000006	75.74	643	138	16	169	803	81930	81298	6e-84	307	1280_4364.contig
USA300HOU_RS07645|lukF	RIWV01000006	82.3	972	166	6	7	975	18439	17471	0	837	1280_18616.fna
USA300HOU_RS07645|lukF	RIWV01000003	77.03	962	191	26	7	953	154364	153418	2e-149	525	1280_18616.fna
USA300HOU_RS07650|lukS	RIWV01000003	75.58	643	139	16	169	803	156645	156013	3e-82	302	1280_18616.fna
USA300HOU_RS07645|lukF	SJAW01000019	82.3	972	166	6	7	975	19491	18523	0	837	1280_26407.fna
USA300HOU_RS07645|lukF	SJAW01000015	77.03	962	191	25	7	953	248683	249629	2e-149	525	1280_26407.fna
USA300HOU_RS07650|lukS	SJAW01000015	75.58	643	139	16	169	803	246402	247034	3e-82	302	1280_26407.fna
USA300HOU_RS07645|lukF	JGGV01000001	100	984	0	0	1	984	91259	90276	0	1818	1418325_3.fna
USA300HOU_RS07645|lukF	JGGV01000001	82.3	972	166	6	7	975	487203	486235	0	837	1418325_3.fna
USA300HOU_RS07645|lukF	JGGV01000002	77.03	962	191	25	7	953	363497	364443	2e-149	525	1418325_3.fna
USA300HOU_RS07650|lukS	JGGV01000001	100	939	0	0	1	939	92193	91255	0	1735	1418325_3.fna
USA300HOU_RS07650|lukS	JGGV01000002	75.74	643	138	16	169	803	361217	361849	7e-84	307	1418325_3.fna
USA300HOU_RS07645|lukF	CGGN01000002	100	984	0	0	1	984	242883	243866	0	1818	1280_4677.contig
USA300HOU_RS07645|lukF	CGGN01000011	82.3	972	166	6	7	975	18396	17428	0	837	1280_4677.contig
USA300HOU_RS07645|lukF	CGGN01000007	77.03	962	191	26	7	953	79193	78247	2e-149	525	1280_4677.contig
USA300HOU_RS07650|lukS	CGGN01000002	100	939	0	0	1	939	241949	242887	0	1735	1280_4677.contig
USA300HOU_RS07650|lukS	CGGN01000007	75.74	643	138	16	169	803	81473	80841	6e-84	307	1280_4677.contig
USA300HOU_RS07645|lukF	NDUL01000043	100	984	0	0	1	984	243056	244039	0	1818	1280_12533.fna
USA300HOU_RS07645|lukF	NDUL01000037	82.3	972	166	6	7	975	37315	38283	0	837	1280_12533.fna
USA300HOU_RS07645|lukF	NDUL01000013	77.03	962	191	26	7	953	79147	78201	2e-149	525	1280_12533.fna
USA300HOU_RS07650|lukS	NDUL01000043	100	939	0	0	1	939	242122	243060	0	1735	1280_12533.fna
USA300HOU_RS07650|lukS	NDUL01000013	75.74	643	138	16	169	803	81427	80795	6e-84	307	1280_12533.fna
USA300HOU_RS07645|lukF	CYPN01000001	100	984	0	0	1	984	242875	243858	0	1818	1280_4375.contig
USA300HOU_RS07645|lukF	CYPN01000008	82.3	972	166	6	7	975	37307	38275	0	837	1280_4375.contig
USA300HOU_RS07645|lukF	CYPN01000004	77.03	962	191	25	7	953	247072	248018	2e-149	525	1280_4375.contig
USA300HOU_RS07650|lukS	CYPN01000001	100	939	0	0	1	939	241941	242879	0	1735	1280_4375.contig
USA300HOU_RS07650|lukS	CYPN01000004	75.74	643	138	16	169	803	244792	245424	6e-84	307	1280_4375.contig
USA300HOU_RS07645|lukF	CP007176	100	984	0	0	1	984	1566866	1565883	0	1818	1458279_3.fna
USA300HOU_RS07645|lukF	CP007176	82.3	972	166	6	7	975	1962811	1961843	0	837	1458279_3.fna
USA300HOU_RS07645|lukF	CP007176	77.03	962	191	25	7	953	2593504	2594450	2e-149	525	1458279_3.fna
USA300HOU_RS07650|lukS	CP007176	100	939	0	0	1	939	1567800	1566862	0	1735	1458279_3.fna
USA300HOU_RS07650|lukS	CP007176	75.74	643	138	16	169	803	2591224	2591856	7e-84	307	1458279_3.fna
USA300HOU_RS07645|lukF	CYME01000002	100	984	0	0	1	984	242952	243935	0	1818	1280_4370.contig
USA300HOU_RS07645|lukF	CYME01000008	82.3	972	166	6	7	975	18398	17430	0	837	1280_4370.contig
USA300HOU_RS07645|lukF	CYME01000003	77.03	962	191	25	7	953	225631	226577	2e-149	525	1280_4370.contig
USA300HOU_RS07650|lukS	CYME01000002	100	939	0	0	1	939	242018	242956	0	1735	1280_4370.contig
USA300HOU_RS07650|lukS	CYME01000003	75.74	643	138	16	169	803	223351	223983	6e-84	307	1280_4370.contig
USA300HOU_RS07645|lukF	1280.4986.con.0015	100	984	0	0	1	984	356449	357432	0	1818	1280_4986.fna
USA300HOU_RS07645|lukF	1280.4986.con.0016	82.3	972	166	6	7	975	18576	17608	0	837	1280_4986.fna
USA300HOU_RS07645|lukF	1280.4986.con.0025	77.03	962	191	25	7	953	630454	631400	2e-149	525	1280_4986.fna
USA300HOU_RS07650|lukS	1280.4986.con.0015	100	939	0	0	1	939	355515	356453	0	1735	1280_4986.fna
USA300HOU_RS07650|lukS	1280.4986.con.0025	75.74	643	138	16	169	803	628174	628806	7e-84	307	1280_4986.fna
USA300HOU_RS07645|lukF	CYIK01000002	100	984	0	0	1	984	242925	243908	0	1818	1280_4475.contig
USA300HOU_RS07645|lukF	CYIK01000007	82.3	972	166	6	7	975	37299	38267	0	837	1280_4475.contig
USA300HOU_RS07645|lukF	CYIK01000004	77.03	962	191	25	7	953	247038	247984	2e-149	525	1280_4475.contig
USA300HOU_RS07650|lukS	CYIK01000002	100	939	0	0	1	939	241991	242929	0	1735	1280_4475.contig
USA300HOU_RS07650|lukS	CYIK01000004	75.58	643	139	16	169	803	244758	245390	3e-82	302	1280_4475.contig
USA300HOU_RS07645|lukF	JDYQ01000002	100	984	0	0	1	984	117425	116442	0	1818	1412761_3.fna
USA300HOU_RS07645|lukF	JDYQ01000006	82.3	972	166	6	7	975	42071	41103	0	837	1412761_3.fna
USA300HOU_RS07645|lukF	JDYQ01000007	77.03	962	191	25	7	953	33117	34063	2e-149	525	1412761_3.fna
USA300HOU_RS07650|lukS	JDYQ01000002	100	939	0	0	1	939	118359	117421	0	1735	1412761_3.fna
USA300HOU_RS07650|lukS	JDYQ01000007	75.74	643	138	16	169	803	30837	31469	6e-84	307	1412761_3.fna
USA300HOU_RS07645|lukF	MUDX01000018	82.1	972	168	6	7	975	18332	17364	0	826	1280_11651.fna
USA300HOU_RS07645|lukF	MUDX01000016	77.03	962	191	26	7	953	79075	78129	2e-149	525	1280_11651.fna
USA300HOU_RS07650|lukS	MUDX01000061	97.22	36	1	0	880	915	175	210	5e-10	62.1	1280_11651.fna
USA300HOU_RS07645|lukF	JEDR01000001	100	984	0	0	1	984	669300	668317	0	1818	1412664_3.fna
USA300HOU_RS07645|lukF	JEDR01000001	82.3	972	166	6	7	975	1063770	1062802	0	837	1412664_3.fna
USA300HOU_RS07645|lukF	JEDR01000005	77.03	962	191	25	7	953	365249	366195	2e-149	525	1412664_3.fna
USA300HOU_RS07650|lukS	JEDR01000001	100	939	0	0	1	939	670234	669296	0	1735	1412664_3.fna
USA300HOU_RS07650|lukS	JEDR01000005	75.74	643	138	16	169	803	362969	363601	6e-84	307	1412664_3.fna
USA300HOU_RS07645|lukF	JABXAN010000002	100	984	0	0	1	984	68109	67126	0	1818	1280_28651.fna
USA300HOU_RS07645|lukF	JABXAN010000010	82.3	972	166	6	7	975	37348	38316	0	837	1280_28651.fna
USA300HOU_RS07645|lukF	JABXAN010000007	76.92	962	192	25	7	953	66117	67063	8e-148	520	1280_28651.fna
USA300HOU_RS07650|lukS	JABXAN010000002	100	939	0	0	1	939	69043	68105	0	1735	1280_28651.fna
USA300HOU_RS07650|lukS	JABXAN010000007	75.74	643	138	16	169	803	63837	64469	6e-84	307	1280_28651.fna
USA300HOU_RS07645|lukF	CYJT01000003	100	984	0	0	1	984	242780	243763	0	1818	1280_4367.contig
USA300HOU_RS07645|lukF	CYJT01000011	82.3	972	166	6	7	975	38583	37615	0	837	1280_4367.contig
USA300HOU_RS07645|lukF	CYJT01000002	77.03	962	191	25	7	953	66253	67199	2e-149	525	1280_4367.contig
USA300HOU_RS07650|lukS	CYJT01000003	100	939	0	0	1	939	241846	242784	0	1735	1280_4367.contig
USA300HOU_RS07650|lukS	CYJT01000002	75.74	643	138	16	169	803	63973	64605	6e-84	307	1280_4367.contig
USA300HOU_RS07645|lukF	CHEW01000002	100	984	0	0	1	984	103690	102707	0	1818	1280_4687.contig
USA300HOU_RS07645|lukF	CHEW01000010	82.2	972	167	6	7	975	37305	38273	0	832	1280_4687.contig
USA300HOU_RS07645|lukF	CHEW01000003	77.03	962	191	26	7	953	79196	78250	2e-149	525	1280_4687.contig
USA300HOU_RS07650|lukS	CHEW01000002	100	939	0	0	1	939	104624	103686	0	1735	1280_4687.contig
USA300HOU_RS07650|lukS	CHEW01000003	75.74	643	138	16	169	803	81476	80844	6e-84	307	1280_4687.contig
USA300HOU_RS07645|lukF	JEAJ01000001	100	984	0	0	1	984	655343	654360	0	1818	1412786_3.fna
USA300HOU_RS07645|lukF	JEAJ01000001	82.3	972	166	6	7	975	1051288	1050320	0	837	1412786_3.fna
USA300HOU_RS07645|lukF	JEAJ01000005	77.03	962	191	25	7	953	365177	366123	2e-149	525	1412786_3.fna
USA300HOU_RS07650|lukS	JEAJ01000001	100	939	0	0	1	939	656277	655339	0	1735	1412786_3.fna
USA300HOU_RS07650|lukS	JEAJ01000005	75.74	643	138	16	169	803	362897	363529	6e-84	307	1412786_3.fna
USA300HOU_RS07645|lukF	JBHY01000002	100	984	0	0	1	984	685582	684599	0	1818	1409653_3.fna
USA300HOU_RS07645|lukF	JBHY01000002	82.3	972	166	6	7	975	1081527	1080559	0	837	1409653_3.fna
USA300HOU_RS07645|lukF	JBHY01000003	77.03	962	191	25	7	953	365243	366189	2e-149	525	1409653_3.fna
USA300HOU_RS07650|lukS	JBHY01000002	100	939	0	0	1	939	686516	685578	0	1735	1409653_3.fna
USA300HOU_RS07650|lukS	JBHY01000003	75.74	643	138	16	169	803	362963	363595	6e-84	307	1409653_3.fna
USA300HOU_RS07645|lukF	CSBG01000002	100	984	0	0	1	984	104106	103123	0	1818	1280_3893.contig
USA300HOU_RS07645|lukF	CSBG01000010	82.3	972	166	6	7	975	37314	38282	0	837	1280_3893.contig
USA300HOU_RS07645|lukF	CSBG01000003	77.03	962	191	26	7	953	79308	78362	2e-149	525	1280_3893.contig
USA300HOU_RS07650|lukS	CSBG01000002	100	939	0	0	1	939	105040	104102	0	1735	1280_3893.contig
USA300HOU_RS07650|lukS	CSBG01000003	75.74	643	138	16	169	803	81588	80956	7e-84	307	1280_3893.contig
USA300HOU_RS07645|lukF	JACODF010000008	82.3	972	166	6	7	975	18439	17471	0	837	1280_30795.fna
USA300HOU_RS07645|lukF	JACODF010000001	77.03	962	191	26	7	953	786392	785446	2e-149	525	1280_30795.fna
USA300HOU_RS07650|lukS	JACODF010000001	75.74	643	138	16	169	803	788672	788040	6e-84	307	1280_30795.fna
USA300HOU_RS07645|lukF	JHUH01000014	82.3	972	166	6	7	975	18311	17343	0	837	904734_3.fna
USA300HOU_RS07645|lukF	JHUH01000033	77.03	962	191	25	7	953	71935	72881	2e-149	525	904734_3.fna
USA300HOU_RS07650|lukS	JHUH01000033	75.74	643	138	16	169	803	69654	70286	6e-84	307	904734_3.fna
USA300HOU_RS07645|lukF	JFUH01000003	99.9	984	0	1	1	984	103702	102720	0	1810	1421846_3.fna
USA300HOU_RS07645|lukF	JFUH01000010	82.3	972	166	6	7	975	39052	38084	0	837	1421846_3.fna
USA300HOU_RS07645|lukF	JFUH01000004	77.03	962	191	25	7	953	66597	67543	2e-149	525	1421846_3.fna
USA300HOU_RS07650|lukS	JFUH01000003	100	939	0	0	1	939	104636	103698	0	1735	1421846_3.fna
USA300HOU_RS07650|lukS	JFUH01000004	75.74	643	138	16	169	803	64317	64949	6e-84	307	1421846_3.fna
USA300HOU_RS07645|lukF	JACOAO010000010	82.3	972	166	6	7	975	37348	38316	0	837	1280_30863.fna
USA300HOU_RS07645|lukF	JACOAO010000002	77.03	962	191	25	7	953	225425	226371	2e-149	525	1280_30863.fna
USA300HOU_RS07650|lukS	JACOAO010000002	75.74	643	138	16	169	803	223145	223777	6e-84	307	1280_30863.fna
USA300HOU_RS07645|lukF	JEPQ01000002	100	984	0	0	1	984	942666	941683	0	1818	1412812_3.fna
USA300HOU_RS07645|lukF	JEPQ01000002	82.3	972	166	6	7	975	1338612	1337644	0	837	1412812_3.fna
USA300HOU_RS07645|lukF	JEPQ01000004	77.03	962	191	25	7	953	429468	430414	2e-149	525	1412812_3.fna
USA300HOU_RS07650|lukS	JEPQ01000002	100	939	0	0	1	939	943600	942662	0	1735	1412812_3.fna
USA300HOU_RS07650|lukS	JEPQ01000004	75.74	643	138	16	169	803	427188	427820	6e-84	307	1412812_3.fna
USA300HOU_RS07645|lukF	CP012119	100	984	0	0	1	984	362361	363344	0	1818	46170_148.fna
USA300HOU_RS07645|lukF	CP012119	82.3	972	166	6	7	975	2885018	2885986	0	837	46170_148.fna
USA300HOU_RS07645|lukF	CP012119	77.03	962	191	26	7	953	2253878	2252932	2e-149	525	46170_148.fna
USA300HOU_RS07650|lukS	CP012119	100	939	0	0	1	939	361427	362365	0	1735	46170_148.fna
USA300HOU_RS07650|lukS	CP012119	75.74	643	138	16	169	803	2256158	2255526	7e-84	307	46170_148.fna
USA300HOU_RS07645|lukF	JBMF01000001	100	984	0	0	1	984	712553	711570	0	1818	1409417_3.fna
USA300HOU_RS07645|lukF	JBMF01000001	82.3	972	166	6	7	975	1108498	1107530	0	837	1409417_3.fna
USA300HOU_RS07645|lukF	JBMF01000002	77.03	962	191	25	7	953	251972	252918	2e-149	525	1409417_3.fna
USA300HOU_RS07650|lukS	JBMF01000001	100	939	0	0	1	939	713487	712549	0	1735	1409417_3.fna
USA300HOU_RS07650|lukS	JBMF01000002	75.74	643	138	16	169	803	249692	250324	6e-84	307	1409417_3.fna
USA300HOU_RS07645|lukF	1280.8149.con.0025	82.3	972	166	6	7	975	15271	14303	0	837	1280_8149.fna
USA300HOU_RS07645|lukF	1280.8149.con.0008	77.03	962	191	25	7	953	66074	67020	2e-149	525	1280_8149.fna
USA300HOU_RS07650|lukS	1280.8149.con.0008	75.74	643	138	16	169	803	63793	64425	6e-84	307	1280_8149.fna
USA300HOU_RS07645|lukF	CP014444	100	984	0	0	1	984	1604689	1603706	0	1818	1280_11690.fna
USA300HOU_RS07645|lukF	CP014444	82.3	972	166	6	7	975	2003919	2002951	0	837	1280_11690.fna
USA300HOU_RS07645|lukF	CP014444	77.03	962	191	25	7	953	2591714	2592660	2e-149	525	1280_11690.fna
USA300HOU_RS07650|lukS	CP014444	100	939	0	0	1	939	1605623	1604685	0	1735	1280_11690.fna
USA300HOU_RS07650|lukS	CP014444	75.74	643	138	16	169	803	2589434	2590066	7e-84	307	1280_11690.fna
USA300HOU_RS07645|lukF	CSJH01000005	100	984	0	0	1	984	136738	137721	0	1818	1280_4045.contig
USA300HOU_RS07645|lukF	CSJH01000013	82.3	972	166	6	7	975	18405	17437	0	837	1280_4045.contig
USA300HOU_RS07645|lukF	CSJH01000003	77.03	962	191	26	7	953	79074	78128	2e-149	525	1280_4045.contig
USA300HOU_RS07650|lukS	CSJH01000005	100	939	0	0	1	939	135804	136742	0	1735	1280_4045.contig
USA300HOU_RS07650|lukS	CSJH01000003	75.74	643	138	16	169	803	81354	80722	6e-84	307	1280_4045.contig
USA300HOU_RS07645|lukF	CP060631	82.3	972	166	6	7	975	1438741	1439709	0	837	1280_30739.fna
USA300HOU_RS07645|lukF	CP060631	77.03	962	191	26	7	953	850588	849642	2e-149	525	1280_30739.fna
USA300HOU_RS07650|lukS	CP060631	75.74	643	138	16	169	803	852869	852237	6e-84	307	1280_30739.fna
USA300HOU_RS07645|lukF	QVQR01000003	100	984	0	0	1	984	88032	87049	0	1818	1280_17979.fna
USA300HOU_RS07645|lukF	QVQR01000012	82.3	972	166	6	7	975	37298	38266	0	837	1280_17979.fna
USA300HOU_RS07645|lukF	QVQR01000005	77.03	962	191	26	7	953	79134	78188	2e-149	525	1280_17979.fna
USA300HOU_RS07650|lukS	QVQR01000003	100	939	0	0	1	939	88966	88028	0	1735	1280_17979.fna
USA300HOU_RS07650|lukS	QVQR01000005	75.74	643	138	16	169	803	81414	80782	6e-84	307	1280_17979.fna
USA300HOU_RS07645|lukF	MUIS01000003	100	984	0	0	1	984	91102	90119	0	1818	1280_12235.fna
USA300HOU_RS07645|lukF	MUIS01000022	82.3	972	166	6	7	975	15129	14161	0	837	1280_12235.fna
USA300HOU_RS07645|lukF	MUIS01000002	77.03	962	191	25	7	953	66070	67016	2e-149	525	1280_12235.fna
USA300HOU_RS07650|lukS	MUIS01000003	100	939	0	0	1	939	92036	91098	0	1735	1280_12235.fna
USA300HOU_RS07650|lukS	MUIS01000002	75.74	643	138	16	169	803	63790	64422	6e-84	307	1280_12235.fna
USA300HOU_RS07645|lukF	NDRL01000055	100	984	0	0	1	984	242906	243889	0	1818	1280_12444.fna
USA300HOU_RS07645|lukF	NDRL01000013	82.3	972	166	6	7	975	37319	38287	0	837	1280_12444.fna
USA300HOU_RS07645|lukF	NDRL01000058	77.03	962	191	25	7	953	195928	196874	2e-149	525	1280_12444.fna
USA300HOU_RS07650|lukS	NDRL01000055	100	939	0	0	1	939	241972	242910	0	1735	1280_12444.fna
USA300HOU_RS07650|lukS	NDRL01000058	75.74	643	138	16	169	803	193648	194280	6e-84	307	1280_12444.fna
USA300HOU_RS07645|lukF	CSEU01000003	100	984	0	0	1	984	103472	102489	0	1818	1280_4042.contig
USA300HOU_RS07645|lukF	CSEU01000008	82.3	972	166	6	7	975	38541	39509	0	837	1280_4042.contig
USA300HOU_RS07645|lukF	CSEU01000002	77.03	962	191	25	7	953	225401	226347	2e-149	525	1280_4042.contig
USA300HOU_RS07650|lukS	CSEU01000003	100	939	0	0	1	939	104406	103468	0	1735	1280_4042.contig
USA300HOU_RS07650|lukS	CSEU01000002	75.74	643	138	16	169	803	223121	223753	6e-84	307	1280_4042.contig
USA300HOU_RS07645|lukF	JDPZ01000008	82.3	972	166	6	7	975	43247	42279	0	837	1411558_3.fna
USA300HOU_RS07645|lukF	JDPZ01000006	77.03	962	191	25	7	953	66156	67102	2e-149	525	1411558_3.fna
USA300HOU_RS07650|lukS	JDPZ01000006	75.74	643	138	16	169	803	63876	64508	6e-84	307	1411558_3.fna
USA300HOU_RS07645|lukF	JEVC01000002	100	984	0	0	1	984	117467	116484	0	1818	1417150_3.fna
USA300HOU_RS07645|lukF	JEVC01000009	82.3	972	166	6	7	975	45211	44243	0	837	1417150_3.fna
USA300HOU_RS07645|lukF	JEVC01000003	77.03	962	191	25	7	953	248034	248980	2e-149	525	1417150_3.fna
USA300HOU_RS07650|lukS	JEVC01000002	100	939	0	0	1	939	118401	117463	0	1735	1417150_3.fna
USA300HOU_RS07650|lukS	JEVC01000003	75.74	643	138	16	169	803	245754	246386	6e-84	307	1417150_3.fna
USA300HOU_RS07645|lukF	CFJN01000002	100	984	0	0	1	984	103475	102492	0	1818	1280_4703.contig
USA300HOU_RS07645|lukF	CFJN01000013	82.3	972	166	6	7	975	37305	38273	0	837	1280_4703.contig
USA300HOU_RS07645|lukF	CFJN01000003	77.03	962	191	26	7	953	153830	152884	2e-149	525	1280_4703.contig
USA300HOU_RS07650|lukS	CFJN01000002	100	939	0	0	1	939	104409	103471	0	1735	1280_4703.contig
USA300HOU_RS07650|lukS	CFJN01000003	75.74	643	138	16	169	803	156110	155478	6e-84	307	1280_4703.contig
USA300HOU_RS07645|lukF	JEEJ01000003	100	984	0	0	1	984	91186	90203	0	1818	1412643_3.fna
USA300HOU_RS07645|lukF	JEEJ01000003	82.3	972	166	6	7	975	487131	486163	0	837	1412643_3.fna
USA300HOU_RS07645|lukF	JEEJ01000004	77.03	962	191	25	7	953	252123	253069	2e-149	525	1412643_3.fna
USA300HOU_RS07650|lukS	JEEJ01000003	100	939	0	0	1	939	92120	91182	0	1735	1412643_3.fna
USA300HOU_RS07650|lukS	JEEJ01000004	75.74	643	138	16	169	803	249843	250475	6e-84	307	1412643_3.fna
USA300HOU_RS07645|lukF	JACGYP010000009	82.2	972	167	6	7	975	39968	40936	0	832	1280_28629.fna
USA300HOU_RS07645|lukF	JACGYP010000002	77.03	962	191	26	7	953	79356	78410	2e-149	525	1280_28629.fna
USA300HOU_RS07650|lukS	JACGYP010000002	75.74	643	138	16	169	803	81637	81005	6e-84	307	1280_28629.fna
USA300HOU_RS07645|lukF	ABWT01000007	100	984	0	0	1	984	40225	41208	0	1818	543539_3.fna
USA300HOU_RS07645|lukF	ABWT01000017	82.3	972	166	6	7	975	37221	38189	0	837	543539_3.fna
USA300HOU_RS07645|lukF	ABWT01000010	77.03	962	191	26	7	953	35766	34820	2e-149	525	543539_3.fna
USA300HOU_RS07650|lukS	ABWT01000007	100	939	0	0	1	939	39291	40229	0	1735	543539_3.fna
USA300HOU_RS07650|lukS	ABWT01000010	75.74	643	138	16	169	803	38046	37414	6e-84	307	543539_3.fna
USA300HOU_RS07645|lukF	JFTP01000005	100	984	0	0	1	984	91244	90261	0	1818	1421874_3.fna
USA300HOU_RS07645|lukF	JFTP01000007	82.3	972	166	6	7	975	62948	61980	0	837	1421874_3.fna
USA300HOU_RS07645|lukF	JFTP01000001	77.03	962	191	25	7	953	363503	364449	2e-149	525	1421874_3.fna
USA300HOU_RS07650|lukS	JFTP01000005	100	939	0	0	1	939	92178	91240	0	1735	1421874_3.fna
USA300HOU_RS07650|lukS	JFTP01000001	75.74	643	138	16	169	803	361223	361855	6e-84	307	1421874_3.fna
USA300HOU_RS07645|lukF	JEDG01000003	100	984	0	0	1	984	117425	116442	0	1818	1412678_3.fna
USA300HOU_RS07645|lukF	JEDG01000003	82.3	972	166	6	7	975	513372	512404	0	837	1412678_3.fna
USA300HOU_RS07645|lukF	JEDG01000004	77.03	962	191	25	7	953	66397	67343	2e-149	525	1412678_3.fna
USA300HOU_RS07650|lukS	JEDG01000003	100	939	0	0	1	939	118359	117421	0	1735	1412678_3.fna
USA300HOU_RS07650|lukS	JEDG01000004	75.74	643	138	16	169	803	64117	64749	7e-84	307	1412678_3.fna
USA300HOU_RS07645|lukF	JBMQ01000001	100	984	0	0	1	984	1048334	1047351	0	1818	1409405_3.fna
USA300HOU_RS07645|lukF	JBMQ01000006	82.3	972	166	6	7	975	19366	18398	0	837	1409405_3.fna
USA300HOU_RS07645|lukF	JBMQ01000002	77.03	962	191	25	7	953	66489	67435	2e-149	525	1409405_3.fna
USA300HOU_RS07650|lukS	JBMQ01000001	100	939	0	0	1	939	1049268	1048330	0	1735	1409405_3.fna
USA300HOU_RS07650|lukS	JBMQ01000002	75.74	643	138	16	169	803	64209	64841	6e-84	307	1409405_3.fna
USA300HOU_RS07645|lukF	CFOM01000002	100	984	0	0	1	984	103453	102470	0	1818	1280_4686.contig
USA300HOU_RS07645|lukF	CFOM01000011	82.3	972	166	6	7	975	18409	17441	0	837	1280_4686.contig
USA300HOU_RS07645|lukF	CFOM01000007	77.03	962	191	26	7	953	79311	78365	2e-149	525	1280_4686.contig
USA300HOU_RS07650|lukS	CFOM01000002	100	939	0	0	1	939	104387	103449	0	1735	1280_4686.contig
USA300HOU_RS07650|lukS	CFOM01000007	75.74	643	138	16	169	803	81591	80959	6e-84	307	1280_4686.contig
USA300HOU_RS07645|lukF	CFOR01000002	100	984	0	0	1	984	242887	243870	0	1818	1280_4665.contig
USA300HOU_RS07645|lukF	CFOR01000011	82.3	972	166	6	7	975	39367	40335	0	837	1280_4665.contig
USA300HOU_RS07645|lukF	CFOR01000003	77.03	962	191	25	7	953	225412	226358	2e-149	525	1280_4665.contig
USA300HOU_RS07650|lukS	CFOR01000002	100	939	0	0	1	939	241953	242891	0	1735	1280_4665.contig
USA300HOU_RS07650|lukS	CFOR01000003	75.74	643	138	16	169	803	223132	223764	6e-84	307	1280_4665.contig
USA300HOU_RS07645|lukF	1280.24800.con.0016	82.3	972	166	6	7	975	17885	16917	0	837	1280_24800.fna
USA300HOU_RS07645|lukF	1280.24800.con.0002	77.03	962	191	25	7	953	225234	226180	2e-149	525	1280_24800.fna
USA300HOU_RS07650|lukS	1280.24800.con.0002	75.74	643	138	16	169	803	222953	223585	6e-84	307	1280_24800.fna
USA300HOU_RS07645|lukF	JEET01000002	99.9	984	1	0	1	984	463053	462070	0	1812	1412631_3.fna
USA300HOU_RS07645|lukF	JEET01000002	82.3	972	166	6	7	975	858999	858031	0	837	1412631_3.fna
USA300HOU_RS07645|lukF	JEET01000003	77.03	962	191	25	7	953	341440	342386	2e-149	525	1412631_3.fna
USA300HOU_RS07650|lukS	JEET01000002	100	939	0	0	1	939	463987	463049	0	1735	1412631_3.fna
USA300HOU_RS07650|lukS	JEET01000003	75.74	643	138	16	169	803	339160	339792	7e-84	307	1412631_3.fna
USA300HOU_RS07645|lukF	JESN01000001	100	984	0	0	1	984	669152	668169	0	1818	1417153_3.fna
USA300HOU_RS07645|lukF	JESN01000006	82.3	972	166	6	7	975	44975	44007	0	837	1417153_3.fna
USA300HOU_RS07645|lukF	JESN01000003	77.03	962	191	25	7	953	155480	156426	2e-149	525	1417153_3.fna
USA300HOU_RS07650|lukS	JESN01000001	100	939	0	0	1	939	670086	669148	0	1735	1417153_3.fna
USA300HOU_RS07650|lukS	JESN01000003	75.74	643	138	16	169	803	153200	153832	7e-84	307	1417153_3.fna
USA300HOU_RS07645|lukF	JEUL01000001	100	984	0	0	1	984	180432	179449	0	1818	1417077_3.fna
USA300HOU_RS07645|lukF	JEUL01000010	82.3	972	166	6	7	975	15311	14343	0	837	1417077_3.fna
USA300HOU_RS07645|lukF	JEUL01000004	77.03	962	191	25	7	953	64952	65898	2e-149	525	1417077_3.fna
USA300HOU_RS07650|lukS	JEUL01000001	100	939	0	0	1	939	181366	180428	0	1735	1417077_3.fna
USA300HOU_RS07650|lukS	JEUL01000004	75.74	643	138	16	169	803	62672	63304	6e-84	307	1417077_3.fna
USA300HOU_RS07645|lukF	JEPZ01000001	100	984	0	0	1	984	669191	668208	0	1818	1417043_3.fna
USA300HOU_RS07645|lukF	JEPZ01000005	82.3	972	166	6	7	975	153600	152632	0	837	1417043_3.fna
USA300HOU_RS07645|lukF	JEPZ01000004	77.03	962	191	25	7	953	155603	156549	2e-149	525	1417043_3.fna
USA300HOU_RS07650|lukS	JEPZ01000001	100	939	0	0	1	939	670125	669187	0	1735	1417043_3.fna
USA300HOU_RS07650|lukS	JEPZ01000004	75.74	643	138	16	169	803	153323	153955	7e-84	307	1417043_3.fna
USA300HOU_RS07645|lukF	CYNC01000002	100	984	0	0	1	984	103466	102483	0	1818	1280_4544.contig
USA300HOU_RS07645|lukF	CYNC01000007	82.3	972	166	6	7	975	79263	78295	0	837	1280_4544.contig
USA300HOU_RS07645|lukF	CYNC01000006	77.03	962	191	26	7	953	79287	78341	2e-149	525	1280_4544.contig
USA300HOU_RS07650|lukS	CYNC01000002	100	939	0	0	1	939	104400	103462	0	1735	1280_4544.contig
USA300HOU_RS07650|lukS	CYNC01000006	75.74	643	138	16	169	803	81566	80934	6e-84	307	1280_4544.contig
USA300HOU_RS07645|lukF	CIGG01000011	82.3	972	166	6	7	975	18410	17442	0	837	1280_4736.contig
USA300HOU_RS07645|lukF	CIGG01000003	77.03	962	191	26	7	953	79220	78274	2e-149	525	1280_4736.contig
USA300HOU_RS07650|lukS	CIGG01000003	75.58	643	139	16	169	803	81501	80869	3e-82	302	1280_4736.contig
USA300HOU_RS07645|lukF	CSFQ01000002	100	984	0	0	1	984	242740	243723	0	1818	1280_3913.contig
USA300HOU_RS07645|lukF	CSFQ01000012	82.3	972	166	6	7	975	18394	17426	0	837	1280_3913.contig
USA300HOU_RS07645|lukF	CSFQ01000009	77.03	962	191	26	7	953	35858	34912	2e-149	525	1280_3913.contig
USA300HOU_RS07650|lukS	CSFQ01000002	100	939	0	0	1	939	241806	242744	0	1735	1280_3913.contig
USA300HOU_RS07650|lukS	CSFQ01000009	75.74	643	138	16	169	803	38138	37506	6e-84	307	1280_3913.contig
USA300HOU_RS07645|lukF	OGAF01000010	100	984	0	0	1	984	234715	235698	0	1818	1280_16159.fna
USA300HOU_RS07645|lukF	OGAF01000019	82.3	972	166	6	7	975	1851	883	0	837	1280_16159.fna
USA300HOU_RS07645|lukF	OGAF01000021	77.03	962	191	26	7	953	66341	65395	2e-149	525	1280_16159.fna
USA300HOU_RS07650|lukS	OGAF01000010	100	939	0	0	1	939	233781	234719	0	1735	1280_16159.fna
USA300HOU_RS07650|lukS	OGAF01000021	75.74	643	138	16	169	803	68621	67989	6e-84	307	1280_16159.fna
USA300HOU_RS07645|lukF	CP020960	100	984	0	0	1	984	1705998	1705015	0	1818	1280_21047.fna
USA300HOU_RS07645|lukF	CP020960	82.3	972	166	6	7	975	2101936	2100968	0	837	1280_21047.fna
USA300HOU_RS07645|lukF	CP020960	77.03	962	191	25	7	953	2626785	2627731	2e-149	525	1280_21047.fna
USA300HOU_RS07650|lukS	CP020960	100	939	0	0	1	939	1706932	1705994	0	1735	1280_21047.fna
USA300HOU_RS07650|lukS	CP020960	75.74	643	138	16	169	803	2624505	2625137	7e-84	307	1280_21047.fna
USA300HOU_RS07645|lukF	NMVS01000003	100	984	0	0	1	984	53371	52388	0	1818	46170_358.fna
USA300HOU_RS07645|lukF	NMVS01000012	82.3	972	166	6	7	975	37348	38316	0	837	46170_358.fna
USA300HOU_RS07645|lukF	NMVS01000002	77.03	962	191	25	7	953	66116	67062	2e-149	525	46170_358.fna
USA300HOU_RS07650|lukS	NMVS01000003	100	939	0	0	1	939	54305	53367	0	1735	46170_358.fna
USA300HOU_RS07650|lukS	NMVS01000002	75.74	643	138	16	169	803	63836	64468	6e-84	307	46170_358.fna
USA300HOU_RS07645|lukF	CSDK01000003	100	984	0	0	1	984	103475	102492	0	1818	1280_3952.contig
USA300HOU_RS07645|lukF	CSDK01000012	82.3	972	166	6	7	975	18431	17463	0	837	1280_3952.contig
USA300HOU_RS07645|lukF	CSDK01000007	77.03	962	191	26	7	953	79316	78370	2e-149	525	1280_3952.contig
USA300HOU_RS07650|lukS	CSDK01000003	100	939	0	0	1	939	104409	103471	0	1735	1280_3952.contig
USA300HOU_RS07650|lukS	CSDK01000007	75.74	643	138	16	169	803	81596	80964	7e-84	307	1280_3952.contig
USA300HOU_RS07645|lukF	JCXE01000016	82.2	972	167	6	7	975	37143	36175	0	832	1398006_3.fna
USA300HOU_RS07645|lukF	JCXE01000014	77.03	962	191	25	7	953	4702	5648	2e-149	525	1398006_3.fna
USA300HOU_RS07650|lukS	JCXE01000014	75.74	643	138	16	169	803	2421	3053	6e-84	307	1398006_3.fna
USA300HOU_RS07645|lukF	CSIJ01000002	100	984	0	0	1	984	242995	243978	0	1818	1280_3868.contig
USA300HOU_RS07645|lukF	CSIJ01000011	82.3	972	166	6	7	975	37305	38273	0	837	1280_3868.contig
USA300HOU_RS07645|lukF	CSIJ01000003	77.03	962	191	26	7	953	79193	78247	2e-149	525	1280_3868.contig
USA300HOU_RS07650|lukS	CSIJ01000002	100	939	0	0	1	939	242061	242999	0	1735	1280_3868.contig
USA300HOU_RS07650|lukS	CSIJ01000003	75.74	643	138	16	169	803	81473	80841	6e-84	307	1280_3868.contig
USA300HOU_RS07645|lukF	JABFKX010000001	100	984	0	0	1	984	376583	377566	0	1818	1280_27479.fna
USA300HOU_RS07645|lukF	JABFKX010000005	82.3	972	166	6	7	975	18439	17471	0	837	1280_27479.fna
USA300HOU_RS07645|lukF	JABFKX010000002	77.03	962	191	25	7	953	247083	248029	2e-149	525	1280_27479.fna
USA300HOU_RS07650|lukS	JABFKX010000001	100	939	0	0	1	939	375649	376587	0	1735	1280_27479.fna
USA300HOU_RS07650|lukS	JABFKX010000002	75.74	643	138	16	169	803	244803	245435	6e-84	307	1280_27479.fna
USA300HOU_RS07645|lukF	CSGH01000002	100	984	0	0	1	984	103475	102492	0	1818	1280_3941.contig
USA300HOU_RS07645|lukF	CSGH01000012	82.3	972	166	6	7	975	37303	38271	0	837	1280_3941.contig
USA300HOU_RS07645|lukF	CSGH01000007	77.03	962	191	26	7	953	79600	78654	2e-149	525	1280_3941.contig
USA300HOU_RS07650|lukS	CSGH01000002	100	939	0	0	1	939	104409	103471	0	1735	1280_3941.contig
USA300HOU_RS07650|lukS	CSGH01000007	75.74	643	138	16	169	803	81880	81248	6e-84	307	1280_3941.contig
USA300HOU_RS07645|lukF	NMVT01000005	100	984	0	0	1	984	123990	124973	0	1818	46170_365.fna
USA300HOU_RS07645|lukF	NMVT01000016	82.3	972	166	6	7	975	18439	17471	0	837	46170_365.fna
USA300HOU_RS07645|lukF	NMVT01000006	77.03	962	191	25	7	953	87139	88085	2e-149	525	46170_365.fna
USA300HOU_RS07650|lukS	NMVT01000005	100	939	0	0	1	939	123056	123994	0	1735	46170_365.fna
USA300HOU_RS07650|lukS	NMVT01000006	75.74	643	138	16	169	803	84859	85491	7e-84	307	46170_365.fna
USA300HOU_RS07645|lukF	1280.4973.con.0019	99.9	984	1	0	1	984	100609	99626	0	1812	1280_4973.fna
USA300HOU_RS07645|lukF	1280.4973.con.0001	82.3	972	166	6	7	975	18561	17593	0	837	1280_4973.fna
USA300HOU_RS07645|lukF	1280.4973.con.0009	77.03	962	191	26	7	953	154185	153239	2e-149	525	1280_4973.fna
USA300HOU_RS07650|lukS	1280.4973.con.0019	100	939	0	0	1	939	101543	100605	0	1735	1280_4973.fna
USA300HOU_RS07650|lukS	1280.4973.con.0009	75.74	643	138	16	169	803	156465	155833	6e-84	307	1280_4973.fna
USA300HOU_RS07645|lukF	CFPT01000002	100	984	0	0	1	984	103468	102485	0	1818	1280_4658.contig
USA300HOU_RS07645|lukF	CFPT01000011	82.3	972	166	6	7	975	18411	17443	0	837	1280_4658.contig
USA300HOU_RS07645|lukF	CFPT01000003	77.03	962	191	26	7	953	79193	78247	2e-149	525	1280_4658.contig
USA300HOU_RS07650|lukS	CFPT01000002	100	939	0	0	1	939	104402	103464	0	1735	1280_4658.contig
USA300HOU_RS07650|lukS	CFPT01000003	75.74	643	138	16	169	803	81473	80841	6e-84	307	1280_4658.contig
USA300HOU_RS07645|lukF	JEOJ01000001	82.3	972	166	6	7	975	1410865	1409897	0	837	1410780_3.fna
USA300HOU_RS07645|lukF	JEOJ01000001	77.03	962	191	25	7	953	1998436	1999382	2e-149	525	1410780_3.fna
USA300HOU_RS07650|lukS	JEOJ01000001	75.58	643	139	16	169	803	1996155	1996787	3e-82	302	1410780_3.fna
USA300HOU_RS07645|lukF	BHBT01000005	82.2	972	167	6	7	975	18014	17046	0	832	46170_608.fna
USA300HOU_RS07645|lukF	BHBT01000002	77.03	962	191	25	7	953	247208	248154	2e-149	525	46170_608.fna
USA300HOU_RS07650|lukS	BHBT01000002	75.74	643	138	16	169	803	244927	245559	6e-84	307	46170_608.fna
USA300HOU_RS07645|lukF	BDYA01000001	82.2	972	167	6	7	975	39968	40936	0	832	1280_17815.fna
USA300HOU_RS07645|lukF	BDYA01000002	77.03	962	191	26	7	953	781775	780829	2e-149	525	1280_17815.fna
USA300HOU_RS07650|lukS	BDYA01000002	75.74	643	138	16	169	803	784056	783424	6e-84	307	1280_17815.fna
USA300HOU_RS07645|lukF	JDIS01000004	100	984	0	0	1	984	698445	697462	0	1818	1410743_3.fna
USA300HOU_RS07645|lukF	JDIS01000004	82.3	972	166	6	7	975	1094390	1093422	0	837	1410743_3.fna
USA300HOU_RS07645|lukF	JDIS01000004	77.03	962	191	25	7	953	1681880	1682826	2e-149	525	1410743_3.fna
USA300HOU_RS07650|lukS	JDIS01000004	100	939	0	0	1	939	699379	698441	0	1735	1410743_3.fna
USA300HOU_RS07650|lukS	JDIS01000004	75.74	643	138	16	169	803	1679600	1680232	6e-84	307	1410743_3.fna
USA300HOU_RS07645|lukF	CIGB01000003	100	984	0	0	1	984	104107	103124	0	1818	1280_4667.contig
USA300HOU_RS07645|lukF	CIGB01000008	82.3	972	166	6	7	975	18410	17442	0	837	1280_4667.contig
USA300HOU_RS07645|lukF	CIGB01000002	77.03	962	191	26	7	953	438148	437202	2e-149	525	1280_4667.contig
USA300HOU_RS07650|lukS	CIGB01000003	100	939	0	0	1	939	105041	104103	0	1735	1280_4667.contig
USA300HOU_RS07650|lukS	CIGB01000002	75.74	643	138	16	169	803	440428	439796	6e-84	307	1280_4667.contig
USA300HOU_RS07645|lukF	CYOV01000001	100	984	0	0	1	984	242924	243907	0	1818	1280_4373.contig
USA300HOU_RS07645|lukF	CYOV01000011	82.3	972	166	6	7	975	37305	38273	0	837	1280_4373.contig
USA300HOU_RS07645|lukF	CYOV01000006	77.03	962	191	25	7	953	66267	67213	2e-149	525	1280_4373.contig
USA300HOU_RS07650|lukS	CYOV01000001	100	939	0	0	1	939	241990	242928	0	1735	1280_4373.contig
USA300HOU_RS07650|lukS	CYOV01000006	75.74	643	138	16	169	803	63987	64619	6e-84	307	1280_4373.contig
USA300HOU_RS07645|lukF	CSCT01000004	100	984	0	0	1	984	103468	102485	0	1818	1280_4001.contig
USA300HOU_RS07645|lukF	CSCT01000010	82.3	972	166	6	7	975	18411	17443	0	837	1280_4001.contig
USA300HOU_RS07645|lukF	CSCT01000005	77.03	962	191	26	7	953	79193	78247	2e-149	525	1280_4001.contig
USA300HOU_RS07650|lukS	CSCT01000004	100	939	0	0	1	939	104402	103464	0	1735	1280_4001.contig
USA300HOU_RS07650|lukS	CSCT01000005	75.74	643	138	16	169	803	81473	80841	7e-84	307	1280_4001.contig
USA300HOU_RS07645|lukF	JGGO01000002	100	984	0	0	1	984	134180	133197	0	1818	1418301_3.fna
USA300HOU_RS07645|lukF	JGGO01000009	82.3	972	166	6	7	975	44889	43921	0	837	1418301_3.fna
USA300HOU_RS07645|lukF	JGGO01000004	77.03	962	191	25	7	953	365275	366221	2e-149	525	1418301_3.fna
USA300HOU_RS07650|lukS	JGGO01000002	100	939	0	0	1	939	135114	134176	0	1735	1418301_3.fna
USA300HOU_RS07650|lukS	JGGO01000004	75.74	643	138	16	169	803	362995	363627	6e-84	307	1418301_3.fna
USA300HOU_RS07645|lukF	JBEW01000001	100	984	0	0	1	984	938505	937522	0	1818	1409773_3.fna
USA300HOU_RS07645|lukF	JBEW01000001	82.3	972	166	6	7	975	1334442	1333474	0	837	1409773_3.fna
USA300HOU_RS07645|lukF	JBEW01000002	77.03	962	191	25	7	953	225797	226743	2e-149	525	1409773_3.fna
USA300HOU_RS07650|lukS	JBEW01000001	100	939	0	0	1	939	939439	938501	0	1735	1409773_3.fna
USA300HOU_RS07650|lukS	JBEW01000002	75.74	643	138	16	169	803	223517	224149	7e-84	307	1409773_3.fna
USA300HOU_RS07645|lukF	CSED01000003	100	984	0	0	1	984	103462	102479	0	1818	1280_3914.contig
USA300HOU_RS07645|lukF	CSED01000009	82.3	972	166	6	7	975	18410	17442	0	837	1280_3914.contig
USA300HOU_RS07645|lukF	CSED01000004	77.03	962	191	26	7	953	79193	78247	2e-149	525	1280_3914.contig
USA300HOU_RS07650|lukS	CSED01000003	100	939	0	0	1	939	104396	103458	0	1735	1280_3914.contig
USA300HOU_RS07650|lukS	CSED01000004	75.74	643	138	16	169	803	81473	80841	6e-84	307	1280_3914.contig
USA300HOU_RS07645|lukF	CSCB01000001	100	984	0	0	1	984	103502	102519	0	1818	1280_3984.contig
USA300HOU_RS07645|lukF	CSCB01000006	82.3	972	166	6	7	975	40698	41666	0	837	1280_3984.contig
USA300HOU_RS07645|lukF	CSCB01000002	77.03	962	191	26	7	953	440349	439403	2e-149	525	1280_3984.contig
USA300HOU_RS07650|lukS	CSCB01000001	100	939	0	0	1	939	104436	103498	0	1735	1280_3984.contig
USA300HOU_RS07650|lukS	CSCB01000002	75.74	643	138	16	169	803	442629	441997	6e-84	307	1280_3984.contig
USA300HOU_RS07645|lukF	FGPI01000023	82.2	972	166	7	7	975	37301	38268	0	830	1280_5621.fna
USA300HOU_RS07645|lukF	FGPI01000007	77.03	962	191	26	7	953	62136	61190	2e-149	525	1280_5621.fna
USA300HOU_RS07650|lukS	FGPI01000007	75.74	643	138	16	169	803	64417	63785	6e-84	307	1280_5621.fna
USA300HOU_RS07645|lukF	LS483319	82.3	972	166	6	7	975	1202814	1203782	0	837	1280_16915.fna
USA300HOU_RS07645|lukF	LS483319	77.03	962	191	25	7	953	2617876	2618822	2e-149	525	1280_16915.fna
USA300HOU_RS07650|lukS	LS483319	75.74	643	138	16	169	803	2615595	2616227	7e-84	307	1280_16915.fna
USA300HOU_RS07645|lukF	JEDP01000006	82.3	972	166	6	7	975	49581	48613	0	837	1412666_3.fna
USA300HOU_RS07645|lukF	JEDP01000004	77.03	962	191	25	7	953	289998	290944	2e-149	525	1412666_3.fna
USA300HOU_RS07650|lukS	JEDP01000004	75.58	643	139	16	169	803	287717	288349	3e-82	302	1412666_3.fna
USA300HOU_RS07645|lukF	JDJF01000002	100	984	0	0	1	984	712538	711555	0	1818	1410757_3.fna
USA300HOU_RS07645|lukF	JDJF01000013	82.3	972	166	6	7	975	19491	18523	0	837	1410757_3.fna
USA300HOU_RS07645|lukF	JDJF01000003	77.03	962	191	25	7	953	225608	226554	2e-149	525	1410757_3.fna
USA300HOU_RS07650|lukS	JDJF01000002	100	939	0	0	1	939	713472	712534	0	1735	1410757_3.fna
USA300HOU_RS07650|lukS	JDJF01000003	75.74	643	138	16	169	803	223328	223960	6e-84	307	1410757_3.fna
USA300HOU_RS07645|lukF	JEES01000006	82.3	972	166	6	7	975	39076	38108	0	837	1412633_3.fna
USA300HOU_RS07645|lukF	JEES01000002	77.03	962	191	25	7	953	365255	366201	2e-149	525	1412633_3.fna
USA300HOU_RS07650|lukS	JEES01000002	75.74	643	138	16	169	803	362975	363607	6e-84	307	1412633_3.fna
USA300HOU_RS07645|lukF	JFUP01000003	100	984	0	0	1	984	2730	1747	0	1818	1421832_3.fna
USA300HOU_RS07645|lukF	JFUP01000013	82.3	972	166	6	7	975	38601	37633	0	837	1421832_3.fna
USA300HOU_RS07645|lukF	JFUP01000002	77.03	962	191	25	7	953	225332	226278	2e-149	525	1421832_3.fna
USA300HOU_RS07650|lukS	JFUP01000003	100	939	0	0	1	939	3664	2726	0	1735	1421832_3.fna
USA300HOU_RS07650|lukS	JFUP01000002	75.74	643	138	16	169	803	223052	223684	7e-84	307	1421832_3.fna
USA300HOU_RS07645|lukF	JEUR01000003	100	984	0	0	1	984	91088	90105	0	1818	1417094_3.fna
USA300HOU_RS07645|lukF	JEUR01000003	82.3	972	166	6	7	975	491321	490353	0	837	1417094_3.fna
USA300HOU_RS07645|lukF	JEUR01000001	77.03	962	191	25	7	953	365355	366301	2e-149	525	1417094_3.fna
USA300HOU_RS07650|lukS	JEUR01000003	100	939	0	0	1	939	92022	91084	0	1735	1417094_3.fna
USA300HOU_RS07650|lukS	JEUR01000001	75.74	643	138	16	169	803	363075	363707	7e-84	307	1417094_3.fna
USA300HOU_RS07645|lukF	JEHI01000023	82.3	972	166	6	7	975	16231	15263	0	837	1402775_3.fna
USA300HOU_RS07645|lukF	JEHI01000005	77.03	962	191	25	7	953	65736	66682	2e-149	525	1402775_3.fna
USA300HOU_RS07650|lukS	JEHI01000005	75.74	643	138	16	169	803	63455	64087	6e-84	307	1402775_3.fna
USA300HOU_RS07645|lukF	JGHL01000003	82.3	972	166	6	7	975	435871	434903	0	837	1418390_3.fna
USA300HOU_RS07645|lukF	JGHL01000002	77.03	962	191	25	7	953	363175	364121	2e-149	525	1418390_3.fna
USA300HOU_RS07650|lukS	JGHL01000002	75.74	643	138	16	169	803	360895	361527	6e-84	307	1418390_3.fna
USA300HOU_RS07645|lukF	JXZN01000001	82.1	972	168	6	7	975	2039641	2040609	0	826	1280_4833.fna
USA300HOU_RS07645|lukF	JXZN01000001	77.03	962	191	25	7	953	552121	553067	2e-149	525	1280_4833.fna
USA300HOU_RS07650|lukS	JXZN01000001	75.74	643	138	16	169	803	549840	550472	6e-84	307	1280_4833.fna
USA300HOU_RS07645|lukF	JDJA01000001	100	984	0	0	1	984	479385	478402	0	1818	1410752_3.fna
USA300HOU_RS07645|lukF	JDJA01000001	82.2	972	167	6	7	975	875331	874363	0	832	1410752_3.fna
USA300HOU_RS07645|lukF	JDJA01000002	77.03	962	191	25	7	953	431127	432073	2e-149	525	1410752_3.fna
USA300HOU_RS07650|lukS	JDJA01000001	100	939	0	0	1	939	480319	479381	0	1735	1410752_3.fna
USA300HOU_RS07650|lukS	JDJA01000002	75.74	643	138	16	169	803	428847	429479	6e-84	307	1410752_3.fna
USA300HOU_RS07645|lukF	CSBL01000003	99.9	984	1	0	1	984	242907	243890	0	1812	1280_3905.contig
USA300HOU_RS07645|lukF	CSBL01000009	82.3	972	166	6	7	975	18409	17441	0	837	1280_3905.contig
USA300HOU_RS07645|lukF	CSBL01000002	77.03	962	191	25	7	953	394434	395380	2e-149	525	1280_3905.contig
USA300HOU_RS07650|lukS	CSBL01000003	100	939	0	0	1	939	241973	242911	0	1735	1280_3905.contig
USA300HOU_RS07650|lukS	CSBL01000002	75.74	643	138	16	169	803	392154	392786	6e-84	307	1280_3905.contig
USA300HOU_RS07645|lukF	JEOL01000001	82.3	972	166	6	7	975	1391989	1391021	0	837	1410843_3.fna
USA300HOU_RS07645|lukF	JEOL01000003	77.03	962	191	25	7	953	248032	248978	2e-149	525	1410843_3.fna
USA300HOU_RS07650|lukS	JEOL01000003	75.74	643	138	16	169	803	245752	246384	6e-84	307	1410843_3.fna
USA300HOU_RS07645|lukF	JABFKI010000001	100	984	0	0	1	984	997076	996093	0	1818	1280_27497.fna
USA300HOU_RS07645|lukF	JABFKI010000006	82.3	972	166	6	7	975	37348	38316	0	837	1280_27497.fna
USA300HOU_RS07645|lukF	JABFKI010000003	77.03	962	191	26	7	953	79986	79040	2e-149	525	1280_27497.fna
USA300HOU_RS07650|lukS	JABFKI010000001	100	939	0	0	1	939	998010	997072	0	1735	1280_27497.fna
USA300HOU_RS07650|lukS	JABFKI010000003	75.74	643	138	16	169	803	82266	81634	6e-84	307	1280_27497.fna
USA300HOU_RS07645|lukF	1280.10014.con.0022	82.41	972	165	6	7	975	15270	14302	0	843	1280_10014.fna
USA300HOU_RS07645|lukF	1280.10014.con.0008	77.03	962	191	25	7	953	66013	66959	2e-149	525	1280_10014.fna
USA300HOU_RS07650|lukS	1280.10014.con.0008	75.74	643	138	16	169	803	63732	64364	6e-84	307	1280_10014.fna
USA300HOU_RS07645|lukF	JEPX01000001	100	984	0	0	1	984	669187	668204	0	1818	1417041_3.fna
USA300HOU_RS07645|lukF	JEPX01000010	82.3	972	166	6	7	975	45501	44533	0	837	1417041_3.fna
USA300HOU_RS07645|lukF	JEPX01000003	77.03	962	191	25	7	953	112929	113875	2e-149	525	1417041_3.fna
USA300HOU_RS07650|lukS	JEPX01000001	100	939	0	0	1	939	670121	669183	0	1735	1417041_3.fna
USA300HOU_RS07650|lukS	JEPX01000003	75.74	643	138	16	169	803	110649	111281	7e-84	307	1417041_3.fna
USA300HOU_RS07645|lukF	CYLV01000003	100	984	0	0	1	984	103456	102473	0	1818	1280_4509.contig
USA300HOU_RS07645|lukF	CYLV01000010	82.3	972	166	6	7	975	39369	40337	0	837	1280_4509.contig
USA300HOU_RS07645|lukF	CYLV01000007	77.03	962	191	25	7	953	66587	67533	2e-149	525	1280_4509.contig
USA300HOU_RS07650|lukS	CYLV01000003	100	939	0	0	1	939	104390	103452	0	1735	1280_4509.contig
USA300HOU_RS07650|lukS	CYLV01000007	75.74	643	138	16	169	803	64307	64939	6e-84	307	1280_4509.contig
USA300HOU_RS07645|lukF	CYNY01000002	100	984	0	0	1	984	350000	350983	0	1818	1280_4361.contig
USA300HOU_RS07645|lukF	CYNY01000009	82.3	972	166	6	7	975	39377	40345	0	837	1280_4361.contig
USA300HOU_RS07645|lukF	CYNY01000001	77.03	962	191	26	7	953	79271	78325	2e-149	525	1280_4361.contig
USA300HOU_RS07650|lukS	CYNY01000002	100	939	0	0	1	939	349066	350004	0	1735	1280_4361.contig
USA300HOU_RS07650|lukS	CYNY01000001	75.74	643	138	16	169	803	81551	80919	6e-84	307	1280_4361.contig
USA300HOU_RS07645|lukF	MUEB01000025	82.1	972	168	6	7	975	18332	17364	0	826	1280_11658.fna
USA300HOU_RS07645|lukF	MUEB01000028	77.03	962	191	25	7	953	752	1698	2e-149	525	1280_11658.fna
USA300HOU_RS07650|lukS	MUEB01000064	97.22	36	1	0	880	915	175	210	5e-10	62.1	1280_11658.fna
USA300HOU_RS07645|lukF	MUEF01000037	82.1	972	168	6	7	975	18332	17364	0	826	1280_11672.fna
USA300HOU_RS07645|lukF	MUEF01000016	77.03	962	191	26	7	953	35880	34934	2e-149	525	1280_11672.fna
USA300HOU_RS07650|lukS	MUEF01000058	76.67	150	34	1	655	803	842	693	4e-16	82.4	1280_11672.fna
USA300HOU_RS07645|lukF	1280.19628.con.0008	82.3	972	166	6	7	975	18439	17471	0	837	1280_19628.fna
USA300HOU_RS07645|lukF	1280.19628.con.0003	77.03	962	191	25	7	953	332920	333866	2e-149	525	1280_19628.fna
USA300HOU_RS07650|lukS	1280.19628.con.0003	75.74	643	138	16	169	803	330639	331271	6e-84	307	1280_19628.fna
USA300HOU_RS07645|lukF	NDNE01000005	100	984	0	0	1	984	3309	4292	0	1818	1280_12334.fna
USA300HOU_RS07645|lukF	NDNE01000041	82.3	972	166	6	7	975	37313	38281	0	837	1280_12334.fna
USA300HOU_RS07645|lukF	NDNE01000055	77.03	962	191	26	7	953	79145	78199	2e-149	525	1280_12334.fna
USA300HOU_RS07650|lukS	NDNE01000005	100	939	0	0	1	939	2375	3313	0	1735	1280_12334.fna
USA300HOU_RS07650|lukS	NDNE01000055	75.74	643	138	16	169	803	81425	80793	6e-84	307	1280_12334.fna
USA300HOU_RS07645|lukF	SEZI01000053	82.3	972	166	6	7	975	31446	32414	0	837	1280_25939.fna
USA300HOU_RS07645|lukF	SEZI01000041	77.03	962	191	26	7	953	81635	80689	2e-149	525	1280_25939.fna
USA300HOU_RS07650|lukS	SEZI01000041	75.58	643	139	16	169	803	83916	83284	3e-82	302	1280_25939.fna
USA300HOU_RS07645|lukF	JESM01000006	82.3	972	166	6	7	975	46162	45194	0	837	1417152_3.fna
USA300HOU_RS07645|lukF	JESM01000003	77.03	962	191	25	7	953	365072	366018	2e-149	525	1417152_3.fna
USA300HOU_RS07650|lukS	JESM01000003	75.74	643	138	16	169	803	362792	363424	6e-84	307	1417152_3.fna
USA300HOU_RS07645|lukF	CIAK01000009	82.15	975	162	10	7	975	39970	40938	0	826	1280_4731.contig
USA300HOU_RS07645|lukF	CIAK01000002	77.03	962	191	26	7	953	463109	462163	2e-149	525	1280_4731.contig
USA300HOU_RS07650|lukS	CIAK01000002	75.74	643	138	16	169	803	465390	464758	6e-84	307	1280_4731.contig
USA300HOU_RS07645|lukF	JDZP01000001	100	984	0	0	1	984	712605	711622	0	1818	1412628_3.fna
USA300HOU_RS07645|lukF	JDZP01000001	82.3	972	166	6	7	975	1108549	1107581	0	837	1412628_3.fna
USA300HOU_RS07645|lukF	JDZP01000002	77.03	962	191	25	7	953	225519	226465	2e-149	525	1412628_3.fna
USA300HOU_RS07650|lukS	JDZP01000001	100	939	0	0	1	939	713539	712601	0	1735	1412628_3.fna
USA300HOU_RS07650|lukS	JDZP01000002	75.74	643	138	16	169	803	223239	223871	7e-84	307	1412628_3.fna
USA300HOU_RS07645|lukF	CSHJ01000003	100	984	0	0	1	984	103458	102475	0	1818	1280_3918.contig
USA300HOU_RS07645|lukF	CSHJ01000009	82.3	972	166	6	7	975	37319	38287	0	837	1280_3918.contig
USA300HOU_RS07645|lukF	CSHJ01000004	77.03	962	191	26	7	953	79193	78247	2e-149	525	1280_3918.contig
USA300HOU_RS07650|lukS	CSHJ01000003	100	939	0	0	1	939	104392	103454	0	1735	1280_3918.contig
USA300HOU_RS07650|lukS	CSHJ01000004	75.74	643	138	16	169	803	81473	80841	6e-84	307	1280_3918.contig
USA300HOU_RS07645|lukF	CSHM01000002	100	984	0	0	1	984	103475	102492	0	1818	1280_4036.contig
USA300HOU_RS07645|lukF	CSHM01000014	82.3	972	166	6	7	975	38734	39702	0	837	1280_4036.contig
USA300HOU_RS07645|lukF	CSHM01000006	77.03	962	191	25	7	953	66253	67199	2e-149	525	1280_4036.contig
USA300HOU_RS07650|lukS	CSHM01000002	100	939	0	0	1	939	104409	103471	0	1735	1280_4036.contig
USA300HOU_RS07650|lukS	CSHM01000006	75.74	643	138	16	169	803	63973	64605	6e-84	307	1280_4036.contig
USA300HOU_RS07645|lukF	JGHN01000004	100	984	0	0	1	984	117468	116485	0	1818	1418397_3.fna
USA300HOU_RS07645|lukF	JGHN01000009	82.3	972	166	6	7	975	45041	44073	0	837	1418397_3.fna
USA300HOU_RS07645|lukF	JGHN01000003	77.03	962	191	25	7	953	65971	66917	2e-149	525	1418397_3.fna
USA300HOU_RS07650|lukS	JGHN01000004	100	939	0	0	1	939	118402	117464	0	1735	1418397_3.fna
USA300HOU_RS07650|lukS	JGHN01000003	75.74	643	138	16	169	803	63691	64323	7e-84	307	1418397_3.fna
USA300HOU_RS07645|lukF	JDQE01000002	100	984	0	0	1	984	712700	711717	0	1818	1411564_3.fna
USA300HOU_RS07645|lukF	JDQE01000011	82.3	972	166	6	7	975	19491	18523	0	837	1411564_3.fna
USA300HOU_RS07645|lukF	JDQE01000003	77.03	962	191	25	7	953	225778	226724	2e-149	525	1411564_3.fna
USA300HOU_RS07650|lukS	JDQE01000002	100	939	0	0	1	939	713634	712696	0	1735	1411564_3.fna
USA300HOU_RS07650|lukS	JDQE01000003	75.74	643	138	16	169	803	223498	224130	6e-84	307	1411564_3.fna
USA300HOU_RS07645|lukF	JDOD01000001	100	984	0	0	1	984	662622	661639	0	1818	1410914_3.fna
USA300HOU_RS07645|lukF	JDOD01000001	82.3	972	166	6	7	975	1058568	1057600	0	837	1410914_3.fna
USA300HOU_RS07645|lukF	JDOD01000005	77.03	962	191	25	7	953	65982	66928	2e-149	525	1410914_3.fna
USA300HOU_RS07650|lukS	JDOD01000001	100	939	0	0	1	939	663556	662618	0	1735	1410914_3.fna
USA300HOU_RS07650|lukS	JDOD01000005	75.74	643	138	16	169	803	63702	64334	6e-84	307	1410914_3.fna
USA300HOU_RS07645|lukF	SJBE01000041	82.3	972	166	6	7	975	17980	17012	0	837	1280_26408.fna
USA300HOU_RS07645|lukF	SJBE01000040	77.03	962	191	26	7	953	79397	78451	2e-149	525	1280_26408.fna
USA300HOU_RS07650|lukS	SJBE01000040	75.74	643	138	16	169	803	81677	81045	6e-84	307	1280_26408.fna
USA300HOU_RS07645|lukF	JDZX01000013	100	984	0	0	1	984	103920	102937	0	1818	1412803_3.fna
USA300HOU_RS07645|lukF	JDZX01000016	82.3	972	166	6	7	975	19491	18523	0	837	1412803_3.fna
USA300HOU_RS07645|lukF	JDZX01000002	77.03	962	191	25	7	953	248034	248980	2e-149	525	1412803_3.fna
USA300HOU_RS07650|lukS	JDZX01000013	100	939	0	0	1	939	104854	103916	0	1735	1412803_3.fna
USA300HOU_RS07650|lukS	JDZX01000002	75.74	643	138	16	169	803	245754	246386	6e-84	307	1412803_3.fna
USA300HOU_RS07645|lukF	JBPW01000008	82.3	972	166	6	7	975	44889	43921	0	837	1409529_3.fna
USA300HOU_RS07645|lukF	JBPW01000006	77.03	962	191	25	7	953	365255	366201	2e-149	525	1409529_3.fna
USA300HOU_RS07650|lukS	JBPW01000006	75.74	643	138	16	169	803	362975	363607	6e-84	307	1409529_3.fna
USA300HOU_RS07645|lukF	JDZN01000006	82.3	972	166	6	7	975	44889	43921	0	837	1412639_3.fna
USA300HOU_RS07645|lukF	JDZN01000005	77.03	962	191	25	7	953	248668	249614	2e-149	525	1412639_3.fna
USA300HOU_RS07650|lukS	JDZN01000005	75.58	643	139	16	169	803	246387	247019	3e-82	302	1412639_3.fna
USA300HOU_RS07645|lukF	JDXA01000001	100	984	0	0	1	984	986561	985578	0	1818	1409687_3.fna
USA300HOU_RS07645|lukF	JDXA01000001	82.3	972	166	6	7	975	1382506	1381538	0	837	1409687_3.fna
USA300HOU_RS07645|lukF	JDXA01000004	77.03	962	191	25	7	953	247772	248718	2e-149	525	1409687_3.fna
USA300HOU_RS07650|lukS	JDXA01000001	100	939	0	0	1	939	987495	986557	0	1735	1409687_3.fna
USA300HOU_RS07650|lukS	JDXA01000004	75.74	643	138	16	169	803	245492	246124	6e-84	307	1409687_3.fna
USA300HOU_RS07645|lukF	JETN01000003	100	984	0	0	1	984	671817	670834	0	1818	1417205_3.fna
USA300HOU_RS07645|lukF	JETN01000003	82.3	972	166	6	7	975	1067889	1066921	0	837	1417205_3.fna
USA300HOU_RS07645|lukF	JETN01000003	77.03	962	191	25	7	953	1655571	1656517	2e-149	525	1417205_3.fna
USA300HOU_RS07650|lukS	JETN01000003	100	939	0	0	1	939	672751	671813	0	1735	1417205_3.fna
USA300HOU_RS07650|lukS	JETN01000003	75.74	643	138	16	169	803	1653291	1653923	6e-84	307	1417205_3.fna
USA300HOU_RS07645|lukF	JBEZ01000001	100	984	0	0	1	984	999784	998801	0	1818	1409741_3.fna
USA300HOU_RS07645|lukF	JBEZ01000003	82.3	972	166	6	7	975	374660	373692	0	837	1409741_3.fna
USA300HOU_RS07645|lukF	JBEZ01000002	77.03	962	191	25	7	953	365257	366203	2e-149	525	1409741_3.fna
USA300HOU_RS07650|lukS	JBEZ01000001	100	939	0	0	1	939	1000718	999780	0	1735	1409741_3.fna
USA300HOU_RS07650|lukS	JBEZ01000002	75.74	643	138	16	169	803	362977	363609	7e-84	307	1409741_3.fna
USA300HOU_RS07645|lukF	1280.8135.con.0020	82.15	975	162	10	7	975	14275	13307	0	826	1280_8135.fna
USA300HOU_RS07645|lukF	1280.8135.con.0002	77.03	962	191	25	7	953	65885	66831	2e-149	525	1280_8135.fna
USA300HOU_RS07650|lukS	1280.8135.con.0002	75.74	643	138	16	169	803	63604	64236	6e-84	307	1280_8135.fna
USA300HOU_RS07645|lukF	CSEA01000002	100	984	0	0	1	984	103462	102479	0	1818	1280_3837.contig
USA300HOU_RS07645|lukF	CSEA01000011	82.3	972	166	6	7	975	18409	17441	0	837	1280_3837.contig
USA300HOU_RS07645|lukF	CSEA01000003	77.03	962	191	26	7	953	79314	78368	2e-149	525	1280_3837.contig
USA300HOU_RS07650|lukS	CSEA01000002	100	939	0	0	1	939	104396	103458	0	1735	1280_3837.contig
USA300HOU_RS07650|lukS	CSEA01000003	75.74	643	138	16	169	803	81594	80962	6e-84	307	1280_3837.contig
USA300HOU_RS07645|lukF	CP007676	100	984	0	0	1	984	1531432	1530449	0	1818	1280_3583.fna
USA300HOU_RS07645|lukF	CP007676	82.3	972	166	6	7	975	1926493	1925525	0	837	1280_3583.fna
USA300HOU_RS07645|lukF	CP007676	77.03	962	191	25	7	953	2514049	2514995	2e-149	525	1280_3583.fna
USA300HOU_RS07650|lukS	CP007676	100	939	0	0	1	939	1532366	1531428	0	1735	1280_3583.fna
USA300HOU_RS07650|lukS	CP007676	75.74	643	138	16	169	803	2511769	2512401	6e-84	307	1280_3583.fna
USA300HOU_RS07645|lukF	CSGI01000005	100	984	0	0	1	984	136765	137748	0	1818	1280_3854.contig
USA300HOU_RS07645|lukF	CSGI01000011	82.3	972	166	6	7	975	42887	43855	0	837	1280_3854.contig
USA300HOU_RS07645|lukF	CSGI01000002	77.03	962	191	25	7	953	225449	226395	2e-149	525	1280_3854.contig
USA300HOU_RS07650|lukS	CSGI01000005	100	939	0	0	1	939	135831	136769	0	1735	1280_3854.contig
USA300HOU_RS07650|lukS	CSGI01000002	75.74	643	138	16	169	803	223169	223801	6e-84	307	1280_3854.contig
USA300HOU_RS07645|lukF	1280.8535.con.0020	82.3	972	166	6	7	975	15271	14303	0	837	1280_8535.fna
USA300HOU_RS07645|lukF	1280.8535.con.0008	77.03	962	191	25	7	953	65680	66626	2e-149	525	1280_8535.fna
USA300HOU_RS07650|lukS	1280.8535.con.0008	75.58	643	139	16	169	803	63399	64031	3e-82	302	1280_8535.fna
USA300HOU_RS07645|lukF	NDSK01000005	100	984	0	0	1	984	350384	351367	0	1818	1280_12458.fna
USA300HOU_RS07645|lukF	NDSK01000040	82.3	972	166	6	7	975	37311	38279	0	837	1280_12458.fna
USA300HOU_RS07645|lukF	NDSK01000085	77.03	962	191	25	7	953	225387	226333	2e-149	525	1280_12458.fna
USA300HOU_RS07650|lukS	NDSK01000005	100	939	0	0	1	939	349450	350388	0	1735	1280_12458.fna
USA300HOU_RS07650|lukS	NDSK01000085	75.74	643	138	16	169	803	223107	223739	6e-84	307	1280_12458.fna
USA300HOU_RS07645|lukF	CFPY01000003	100	984	0	0	1	984	103475	102492	0	1818	1280_4702.contig
USA300HOU_RS07645|lukF	CFPY01000008	82.3	972	166	6	7	975	18428	17460	0	837	1280_4702.contig
USA300HOU_RS07645|lukF	CFPY01000002	77.03	962	191	26	7	953	646553	645607	2e-149	525	1280_4702.contig
USA300HOU_RS07650|lukS	CFPY01000003	100	939	0	0	1	939	104409	103471	0	1735	1280_4702.contig
USA300HOU_RS07650|lukS	CFPY01000002	75.74	643	138	16	169	803	648833	648201	6e-84	307	1280_4702.contig
USA300HOU_RS07645|lukF	CYLH01000002	100	984	0	0	1	984	103475	102492	0	1818	1280_4542.contig
USA300HOU_RS07645|lukF	CYLH01000010	82.3	972	166	6	7	975	37710	38678	0	837	1280_4542.contig
USA300HOU_RS07645|lukF	CYLH01000001	77.03	962	191	26	7	953	359717	358771	2e-149	525	1280_4542.contig
USA300HOU_RS07650|lukS	CYLH01000002	100	939	0	0	1	939	104409	103471	0	1735	1280_4542.contig
USA300HOU_RS07650|lukS	CYLH01000001	75.74	643	138	16	169	803	361997	361365	6e-84	307	1280_4542.contig
USA300HOU_RS07645|lukF	FMOY01000007	82.3	972	166	6	7	975	37307	38275	0	837	1280_10466.fna
USA300HOU_RS07645|lukF	FMOY01000004	77.03	962	191	26	7	953	79336	78390	2e-149	525	1280_10466.fna
USA300HOU_RS07650|lukS	FMOY01000004	75.74	643	138	16	169	803	81617	80985	6e-84	307	1280_10466.fna
USA300HOU_RS07645|lukF	JEEY01000002	100	984	0	0	1	984	686561	685578	0	1818	1412623_3.fna
USA300HOU_RS07645|lukF	JEEY01000002	82.3	972	166	6	7	975	1080763	1079795	0	837	1412623_3.fna
USA300HOU_RS07645|lukF	JEEY01000004	77.03	962	191	25	7	953	66596	67542	2e-149	525	1412623_3.fna
USA300HOU_RS07650|lukS	JEEY01000002	100	939	0	0	1	939	687495	686557	0	1735	1412623_3.fna
USA300HOU_RS07650|lukS	JEEY01000004	75.74	643	138	16	169	803	64316	64948	6e-84	307	1412623_3.fna
USA300HOU_RS07645|lukF	JABFKZ010000004	99.9	984	1	0	1	984	356826	357809	0	1812	1280_27484.fna
USA300HOU_RS07645|lukF	JABFKZ010000007	82.3	972	166	6	7	975	18439	17471	0	837	1280_27484.fna
USA300HOU_RS07645|lukF	JABFKZ010000002	77.03	962	191	26	7	953	79354	78408	2e-149	525	1280_27484.fna
USA300HOU_RS07650|lukS	JABFKZ010000004	100	939	0	0	1	939	355892	356830	0	1735	1280_27484.fna
USA300HOU_RS07650|lukS	JABFKZ010000002	75.74	643	138	16	169	803	81634	81002	6e-84	307	1280_27484.fna
USA300HOU_RS07645|lukF	CFPU01000003	100	984	0	0	1	984	242986	243969	0	1818	1280_4762.contig
USA300HOU_RS07645|lukF	CFPU01000010	82.3	972	166	6	7	975	37297	38265	0	837	1280_4762.contig
USA300HOU_RS07645|lukF	CFPU01000002	77.03	962	191	26	7	953	319532	318586	2e-149	525	1280_4762.contig
USA300HOU_RS07650|lukS	CFPU01000003	100	939	0	0	1	939	242052	242990	0	1735	1280_4762.contig
USA300HOU_RS07650|lukS	CFPU01000002	75.74	643	138	16	169	803	321812	321180	6e-84	307	1280_4762.contig
USA300HOU_RS07645|lukF	1280.4965.con.0030	100	984	0	0	1	984	88031	87048	0	1818	1280_4965.fna
USA300HOU_RS07645|lukF	1280.4965.con.0008	82.3	972	166	6	7	975	17159	16191	0	837	1280_4965.fna
USA300HOU_RS07645|lukF	1280.4965.con.0011	77.03	962	191	25	7	953	248452	249398	2e-149	525	1280_4965.fna
USA300HOU_RS07650|lukS	1280.4965.con.0030	100	939	0	0	1	939	88965	88027	0	1735	1280_4965.fna
USA300HOU_RS07650|lukS	1280.4965.con.0011	75.74	643	138	16	169	803	246172	246804	6e-84	307	1280_4965.fna
USA300HOU_RS07645|lukF	CYIS01000002	100	984	0	0	1	984	156318	155335	0	1818	1280_4455.contig
USA300HOU_RS07645|lukF	CYIS01000007	82.3	972	166	6	7	975	40017	40985	0	837	1280_4455.contig
USA300HOU_RS07645|lukF	CYIS01000001	77.03	962	191	26	7	953	406099	405153	2e-149	525	1280_4455.contig
USA300HOU_RS07650|lukS	CYIS01000002	100	939	0	0	1	939	157252	156314	0	1735	1280_4455.contig
USA300HOU_RS07650|lukS	CYIS01000001	75.74	643	138	16	169	803	408379	407747	6e-84	307	1280_4455.contig
USA300HOU_RS07645|lukF	JERT01000004	100	984	0	0	1	984	117450	116467	0	1818	1417115_3.fna
USA300HOU_RS07645|lukF	JERT01000009	82.3	972	166	6	7	975	44429	43461	0	837	1417115_3.fna
USA300HOU_RS07645|lukF	JERT01000007	77.03	962	191	25	7	953	66596	67542	2e-149	525	1417115_3.fna
USA300HOU_RS07650|lukS	JERT01000004	100	939	0	0	1	939	118384	117446	0	1735	1417115_3.fna
USA300HOU_RS07650|lukS	JERT01000007	75.74	643	138	16	169	803	64316	64948	6e-84	307	1417115_3.fna
USA300HOU_RS07645|lukF	CSDU01000002	100	984	0	0	1	984	103485	102502	0	1818	1280_3944.contig
USA300HOU_RS07645|lukF	CSDU01000014	82.3	972	166	6	7	975	37309	38277	0	837	1280_3944.contig
USA300HOU_RS07645|lukF	CSDU01000006	77.03	962	191	25	7	953	66254	67200	2e-149	525	1280_3944.contig
USA300HOU_RS07650|lukS	CSDU01000002	100	939	0	0	1	939	104419	103481	0	1735	1280_3944.contig
USA300HOU_RS07650|lukS	CSDU01000006	75.74	643	138	16	169	803	63974	64606	6e-84	307	1280_3944.contig
USA300HOU_RS07645|lukF	JDLJ01000008	100	984	0	0	1	984	103580	102597	0	1818	1410820_3.fna
USA300HOU_RS07645|lukF	JDLJ01000014	82.3	972	166	6	7	975	19491	18523	0	837	1410820_3.fna
USA300HOU_RS07645|lukF	JDLJ01000004	77.03	962	191	25	7	953	65789	66735	2e-149	525	1410820_3.fna
USA300HOU_RS07650|lukS	JDLJ01000008	100	939	0	0	1	939	104514	103576	0	1735	1410820_3.fna
USA300HOU_RS07650|lukS	JDLJ01000004	75.74	643	138	16	169	803	63509	64141	6e-84	307	1410820_3.fna
USA300HOU_RS07645|lukF	CYNE01000003	100	984	0	0	1	984	242845	243828	0	1818	1280_4447.contig
USA300HOU_RS07645|lukF	CYNE01000009	82.3	972	166	6	7	975	18433	17465	0	837	1280_4447.contig
USA300HOU_RS07645|lukF	CYNE01000005	77.03	962	191	25	7	953	246979	247925	2e-149	525	1280_4447.contig
USA300HOU_RS07650|lukS	CYNE01000003	100	939	0	0	1	939	241911	242849	0	1735	1280_4447.contig
USA300HOU_RS07650|lukS	CYNE01000005	75.74	643	138	16	169	803	244699	245331	6e-84	307	1280_4447.contig
USA300HOU_RS07645|lukF	JBFR01000001	100	984	0	0	1	984	1187232	1186249	0	1818	1409721_3.fna
USA300HOU_RS07645|lukF	JBFR01000001	82.3	972	166	6	7	975	1583177	1582209	0	837	1409721_3.fna
USA300HOU_RS07645|lukF	JBFR01000002	77.03	962	191	25	7	953	365254	366200	2e-149	525	1409721_3.fna
USA300HOU_RS07650|lukS	JBFR01000001	100	939	0	0	1	939	1188166	1187228	0	1735	1409721_3.fna
USA300HOU_RS07650|lukS	JBFR01000002	75.74	643	138	16	169	803	362974	363606	7e-84	307	1409721_3.fna
USA300HOU_RS07645|lukF	CYIR01000002	100	984	0	0	1	984	242853	243836	0	1818	1280_4368.contig
USA300HOU_RS07645|lukF	CYIR01000011	82.3	972	166	6	7	975	18452	17484	0	837	1280_4368.contig
USA300HOU_RS07645|lukF	CYIR01000005	77.03	962	191	25	7	953	225449	226395	2e-149	525	1280_4368.contig
USA300HOU_RS07650|lukS	CYIR01000002	100	939	0	0	1	939	241919	242857	0	1735	1280_4368.contig
USA300HOU_RS07650|lukS	CYIR01000005	75.74	643	138	16	169	803	223169	223801	6e-84	307	1280_4368.contig
USA300HOU_RS07645|lukF	JDJP01000016	82.3	972	166	6	7	975	19491	18523	0	837	1410768_3.fna
USA300HOU_RS07645|lukF	JDJP01000009	77.03	962	191	25	7	953	66160	67106	2e-149	525	1410768_3.fna
USA300HOU_RS07650|lukS	JDJP01000009	75.58	643	139	16	169	803	63879	64511	3e-82	302	1410768_3.fna
USA300HOU_RS07645|lukF	CYNR01000003	100	984	0	0	1	984	103447	102464	0	1818	1280_4502.contig
USA300HOU_RS07645|lukF	CYNR01000011	82.3	972	166	6	7	975	37307	38275	0	837	1280_4502.contig
USA300HOU_RS07645|lukF	CYNR01000007	77.03	962	191	25	7	953	66253	67199	2e-149	525	1280_4502.contig
USA300HOU_RS07650|lukS	CYNR01000003	100	939	0	0	1	939	104381	103443	0	1735	1280_4502.contig
USA300HOU_RS07650|lukS	CYNR01000007	75.74	643	138	16	169	803	63973	64605	6e-84	307	1280_4502.contig
USA300HOU_RS07645|lukF	JACGYH010000012	82.2	972	167	6	7	975	39968	40936	0	832	1280_28621.fna
USA300HOU_RS07645|lukF	JACGYH010000004	77.03	962	191	26	7	953	79739	78793	2e-149	525	1280_28621.fna
USA300HOU_RS07650|lukS	JACGYH010000004	75.74	643	138	16	169	803	82020	81388	7e-84	307	1280_28621.fna
USA300HOU_RS07645|lukF	CYMY01000002	100	984	0	0	1	984	242863	243846	0	1818	1280_4457.contig
USA300HOU_RS07645|lukF	CYMY01000010	82.3	972	166	6	7	975	38541	39509	0	837	1280_4457.contig
USA300HOU_RS07645|lukF	CYMY01000003	77.03	962	191	26	7	953	79193	78247	2e-149	525	1280_4457.contig
USA300HOU_RS07650|lukS	CYMY01000002	100	939	0	0	1	939	241929	242867	0	1735	1280_4457.contig
USA300HOU_RS07650|lukS	CYMY01000003	75.74	643	138	16	169	803	81473	80841	6e-84	307	1280_4457.contig
USA300HOU_RS07645|lukF	JERH01000005	100	984	0	0	1	984	134036	133053	0	1818	1417101_3.fna
USA300HOU_RS07645|lukF	JERH01000007	82.3	972	166	6	7	975	46050	45082	0	837	1417101_3.fna
USA300HOU_RS07645|lukF	JERH01000002	77.03	962	191	25	7	953	365349	366295	2e-149	525	1417101_3.fna
USA300HOU_RS07650|lukS	JERH01000005	100	939	0	0	1	939	134970	134032	0	1735	1417101_3.fna
USA300HOU_RS07650|lukS	JERH01000002	75.74	643	138	16	169	803	363069	363701	6e-84	307	1417101_3.fna
USA300HOU_RS07645|lukF	JDFZ01000002	100	984	0	0	1	984	103920	102937	0	1818	1410698_3.fna
USA300HOU_RS07645|lukF	JDFZ01000012	82.3	972	166	6	7	975	19491	18523	0	837	1410698_3.fna
USA300HOU_RS07645|lukF	JDFZ01000004	77.03	962	191	25	7	953	248033	248979	2e-149	525	1410698_3.fna
USA300HOU_RS07650|lukS	JDFZ01000002	100	939	0	0	1	939	104854	103916	0	1735	1410698_3.fna
USA300HOU_RS07650|lukS	JDFZ01000004	75.74	643	138	16	169	803	245753	246385	6e-84	307	1410698_3.fna
USA300HOU_RS07645|lukF	MUIR01000007	100	984	0	0	1	984	40147	41130	0	1818	1280_12236.fna
USA300HOU_RS07645|lukF	MUIR01000021	82.3	972	166	6	7	975	15166	14198	0	837	1280_12236.fna
USA300HOU_RS07645|lukF	MUIR01000003	77.03	962	191	25	7	953	66070	67016	2e-149	525	1280_12236.fna
USA300HOU_RS07650|lukS	MUIR01000007	100	939	0	0	1	939	39213	40151	0	1735	1280_12236.fna
USA300HOU_RS07650|lukS	MUIR01000003	75.74	643	138	16	169	803	63790	64422	6e-84	307	1280_12236.fna
USA300HOU_RS07645|lukF	JACGOB010000009	82.1	972	168	6	7	975	37299	38267	0	826	1280_28579.fna
USA300HOU_RS07645|lukF	JACGOB010000005	77.03	962	191	26	7	953	79387	78441	2e-149	525	1280_28579.fna
USA300HOU_RS07650|lukS	JACGOB010000005	75.74	643	138	16	169	803	81668	81036	6e-84	307	1280_28579.fna
USA300HOU_RS07645|lukF	JDLA01000005	82.3	972	166	6	7	975	21198	20230	0	837	1410810_3.fna
USA300HOU_RS07645|lukF	JDLA01000003	77.03	962	191	25	7	953	365252	366198	2e-149	525	1410810_3.fna
USA300HOU_RS07650|lukS	JDLA01000003	75.74	643	138	16	169	803	362972	363604	6e-84	307	1410810_3.fna
USA300HOU_RS07645|lukF	LGWV01000006	100	984	0	0	1	984	104257	105240	0	1818	1280_13669.fna
USA300HOU_RS07645|lukF	LGWV01000003	82.3	972	166	6	7	975	18332	17364	0	837	1280_13669.fna
USA300HOU_RS07645|lukF	LGWV01000008	77.03	962	191	25	7	953	112807	113753	2e-149	525	1280_13669.fna
USA300HOU_RS07650|lukS	LGWV01000006	100	939	0	0	1	939	103323	104261	0	1735	1280_13669.fna
USA300HOU_RS07650|lukS	LGWV01000008	75.74	643	138	16	169	803	110527	111159	6e-84	307	1280_13669.fna
USA300HOU_RS07645|lukF	CYMD01000008	82.15	975	162	10	7	975	14304	13336	0	826	1280_4389.contig
USA300HOU_RS07645|lukF	CYMD01000002	77.03	962	191	25	7	953	188214	189160	2e-149	525	1280_4389.contig
USA300HOU_RS07650|lukS	CYMD01000002	75.74	643	138	16	169	803	185933	186565	6e-84	307	1280_4389.contig
USA300HOU_RS07645|lukF	JEDW01000016	82.3	972	166	6	7	975	19491	18523	0	837	1412659_3.fna
USA300HOU_RS07645|lukF	JEDW01000004	77.03	962	191	25	7	953	155668	156614	2e-149	525	1412659_3.fna
USA300HOU_RS07650|lukS	JEDW01000004	75.58	643	139	16	169	803	153387	154019	3e-82	302	1412659_3.fna
USA300HOU_RS07645|lukF	QPLD01000016	82.3	972	166	6	7	975	17340	16372	0	837	1280_26411.fna
USA300HOU_RS07645|lukF	QPLD01000002	77.03	962	191	26	7	953	79605	78659	2e-149	525	1280_26411.fna
USA300HOU_RS07650|lukS	QPLD01000002	75.74	643	138	16	169	803	81886	81254	6e-84	307	1280_26411.fna
USA300HOU_RS07645|lukF	CSHG01000003	100	984	0	0	1	984	103475	102492	0	1818	1280_4059.contig
USA300HOU_RS07645|lukF	CSHG01000008	82.3	972	166	6	7	975	37316	38284	0	837	1280_4059.contig
USA300HOU_RS07645|lukF	CSHG01000002	77.03	962	191	26	7	953	437817	436871	2e-149	525	1280_4059.contig
USA300HOU_RS07650|lukS	CSHG01000003	100	939	0	0	1	939	104409	103471	0	1735	1280_4059.contig
USA300HOU_RS07650|lukS	CSHG01000002	75.74	643	138	16	169	803	440097	439465	6e-84	307	1280_4059.contig
USA300HOU_RS07645|lukF	CSHO01000002	100	984	0	0	1	984	242890	243873	0	1818	1280_3904.contig
USA300HOU_RS07645|lukF	CSHO01000010	82.3	972	166	6	7	975	37303	38271	0	837	1280_3904.contig
USA300HOU_RS07645|lukF	CSHO01000003	77.03	962	191	26	7	953	79298	78352	2e-149	525	1280_3904.contig
USA300HOU_RS07650|lukS	CSHO01000002	100	939	0	0	1	939	241956	242894	0	1735	1280_3904.contig
USA300HOU_RS07650|lukS	CSHO01000003	75.74	643	138	16	169	803	81578	80946	6e-84	307	1280_3904.contig
USA300HOU_RS07645|lukF	CFOF01000002	100	984	0	0	1	984	242896	243879	0	1818	1280_4695.contig
USA300HOU_RS07645|lukF	CFOF01000010	82.3	972	166	6	7	975	37303	38271	0	837	1280_4695.contig
USA300HOU_RS07645|lukF	CFOF01000007	77.03	962	191	25	7	953	65739	66685	2e-149	525	1280_4695.contig
USA300HOU_RS07650|lukS	CFOF01000002	100	939	0	0	1	939	241962	242900	0	1735	1280_4695.contig
USA300HOU_RS07650|lukS	CFOF01000007	75.74	643	138	16	169	803	63459	64091	6e-84	307	1280_4695.contig
USA300HOU_RS07645|lukF	BEAG01000005	82.3	972	166	6	7	975	18598	17630	0	837	1280_17872.fna
USA300HOU_RS07645|lukF	BEAG01000002	77.03	962	191	26	7	953	746440	745494	2e-149	525	1280_17872.fna
USA300HOU_RS07650|lukS	BEAG01000002	75.58	643	139	16	169	803	748721	748089	3e-82	302	1280_17872.fna
USA300HOU_RS07645|lukF	CSBW01000002	100	984	0	0	1	984	103456	102473	0	1818	1280_3956.contig
USA300HOU_RS07645|lukF	CSBW01000011	82.3	972	166	6	7	975	18408	17440	0	837	1280_3956.contig
USA300HOU_RS07645|lukF	CSBW01000006	77.03	962	191	26	7	953	79216	78270	2e-149	525	1280_3956.contig
USA300HOU_RS07650|lukS	CSBW01000002	100	939	0	0	1	939	104390	103452	0	1735	1280_3956.contig
USA300HOU_RS07650|lukS	CSBW01000006	75.74	643	138	16	169	803	81496	80864	6e-84	307	1280_3956.contig
USA300HOU_RS07645|lukF	LBIJ01000007	100	984	0	0	1	984	91107	90124	0	1818	1410003_3.fna
USA300HOU_RS07645|lukF	LBIJ01000039	82.3	972	166	6	7	975	15333	14365	0	837	1410003_3.fna
USA300HOU_RS07645|lukF	LBIJ01000003	77.03	962	191	25	7	953	112838	113784	2e-149	525	1410003_3.fna
USA300HOU_RS07650|lukS	LBIJ01000007	100	939	0	0	1	939	92041	91103	0	1735	1410003_3.fna
USA300HOU_RS07650|lukS	LBIJ01000003	75.74	643	138	16	169	803	110558	111190	6e-84	307	1410003_3.fna
USA300HOU_RS07645|lukF	JFSI01000001	100	984	0	0	1	984	712624	711641	0	1818	1421861_3.fna
USA300HOU_RS07645|lukF	JFSI01000007	82.3	972	166	6	7	975	18405	17437	0	837	1421861_3.fna
USA300HOU_RS07645|lukF	JFSI01000002	77.03	962	191	25	7	953	66488	67434	2e-149	525	1421861_3.fna
USA300HOU_RS07650|lukS	JFSI01000001	100	939	0	0	1	939	713558	712620	0	1735	1421861_3.fna
USA300HOU_RS07650|lukS	JFSI01000002	75.74	643	138	16	169	803	64208	64840	7e-84	307	1421861_3.fna
USA300HOU_RS07645|lukF	JDNH01000014	82.3	972	166	6	7	975	19491	18523	0	837	1410876_3.fna
USA300HOU_RS07645|lukF	JDNH01000004	77.03	962	191	25	7	953	225779	226725	2e-149	525	1410876_3.fna
USA300HOU_RS07650|lukS	JDNH01000004	75.74	643	138	16	169	803	223499	224131	6e-84	307	1410876_3.fna
USA300HOU_RS07645|lukF	CVQR01000002	100	984	0	0	1	984	103683	102700	0	1818	1280_3623.contig
USA300HOU_RS07645|lukF	CVQR01000010	82.2	972	167	6	7	975	38541	39509	0	832	1280_3623.contig
USA300HOU_RS07645|lukF	CVQR01000003	77.03	962	191	26	7	953	79196	78250	2e-149	525	1280_3623.contig
USA300HOU_RS07650|lukS	CVQR01000002	100	939	0	0	1	939	104617	103679	0	1735	1280_3623.contig
USA300HOU_RS07650|lukS	CVQR01000003	75.74	643	138	16	169	803	81476	80844	6e-84	307	1280_3623.contig
USA300HOU_RS07645|lukF	CSCQ01000003	100	984	0	0	1	984	243000	243983	0	1818	1280_3901.contig
USA300HOU_RS07645|lukF	CSCQ01000009	82.3	972	166	6	7	975	40484	41452	0	837	1280_3901.contig
USA300HOU_RS07645|lukF	CSCQ01000005	77.03	962	191	26	7	953	79153	78207	2e-149	525	1280_3901.contig
USA300HOU_RS07650|lukS	CSCQ01000003	100	939	0	0	1	939	242066	243004	0	1735	1280_3901.contig
USA300HOU_RS07650|lukS	CSCQ01000005	75.74	643	138	16	169	803	81433	80801	6e-84	307	1280_3901.contig
USA300HOU_RS07645|lukF	JABFKT010000001	100	984	0	0	1	984	376582	377565	0	1818	1280_27486.fna
USA300HOU_RS07645|lukF	JABFKT010000006	82.3	972	166	6	7	975	37348	38316	0	837	1280_27486.fna
USA300HOU_RS07645|lukF	JABFKT010000003	77.03	962	191	26	7	953	79985	79039	2e-149	525	1280_27486.fna
USA300HOU_RS07650|lukS	JABFKT010000001	100	939	0	0	1	939	375648	376586	0	1735	1280_27486.fna
USA300HOU_RS07650|lukS	JABFKT010000003	75.74	643	138	16	169	803	82265	81633	6e-84	307	1280_27486.fna
USA300HOU_RS07645|lukF	JECA01000001	100	984	0	0	1	984	1048487	1047504	0	1818	1412720_3.fna
USA300HOU_RS07645|lukF	JECA01000001	82.3	972	166	6	7	975	1444432	1443464	0	837	1412720_3.fna
USA300HOU_RS07645|lukF	JECA01000003	77.03	962	191	25	7	953	365254	366200	2e-149	525	1412720_3.fna
USA300HOU_RS07650|lukS	JECA01000001	100	939	0	0	1	939	1049421	1048483	0	1735	1412720_3.fna
USA300HOU_RS07650|lukS	JECA01000003	75.74	643	138	16	169	803	362974	363606	6e-84	307	1412720_3.fna
USA300HOU_RS07645|lukF	JEAM01000009	82.3	972	166	6	7	975	49582	48614	0	837	1412782_3.fna
USA300HOU_RS07645|lukF	JEAM01000004	77.03	962	191	25	7	953	225377	226323	2e-149	525	1412782_3.fna
USA300HOU_RS07650|lukS	JEAM01000004	75.58	643	139	16	169	803	223096	223728	3e-82	302	1412782_3.fna
USA300HOU_RS07645|lukF	CYOC01000002	100	984	0	0	1	984	104106	103123	0	1818	1280_4468.contig
USA300HOU_RS07645|lukF	CYOC01000012	82.3	972	166	6	7	975	37307	38275	0	837	1280_4468.contig
USA300HOU_RS07645|lukF	CYOC01000007	77.03	962	191	25	7	953	66584	67530	2e-149	525	1280_4468.contig
USA300HOU_RS07650|lukS	CYOC01000002	100	939	0	0	1	939	105040	104102	0	1735	1280_4468.contig
USA300HOU_RS07650|lukS	CYOC01000007	75.74	643	138	16	169	803	64304	64936	6e-84	307	1280_4468.contig
USA300HOU_RS07645|lukF	JDKQ01000010	100	984	0	0	1	984	28369	27386	0	1818	1410799_3.fna
USA300HOU_RS07645|lukF	JDKQ01000003	82.3	972	166	6	7	975	367376	366408	0	837	1410799_3.fna
USA300HOU_RS07645|lukF	JDKQ01000005	77.03	962	191	25	7	953	113061	114007	2e-149	525	1410799_3.fna
USA300HOU_RS07650|lukS	JDKQ01000010	100	939	0	0	1	939	29303	28365	0	1735	1410799_3.fna
USA300HOU_RS07650|lukS	JDKQ01000005	75.74	643	138	16	169	803	110781	111413	6e-84	307	1410799_3.fna
USA300HOU_RS07645|lukF	CSJS01000002	100	984	0	0	1	984	103475	102492	0	1818	1280_4031.contig
USA300HOU_RS07645|lukF	CSJS01000011	82.3	972	166	6	7	975	18397	17429	0	837	1280_4031.contig
USA300HOU_RS07645|lukF	CSJS01000007	77.03	962	191	26	7	953	79193	78247	2e-149	525	1280_4031.contig
USA300HOU_RS07650|lukS	CSJS01000002	100	939	0	0	1	939	104409	103471	0	1735	1280_4031.contig
USA300HOU_RS07650|lukS	CSJS01000007	75.74	643	138	16	169	803	81473	80841	6e-84	307	1280_4031.contig
USA300HOU_RS07645|lukF	NDTT01000011	100	984	0	0	1	984	40168	41151	0	1818	1280_12579.fna
USA300HOU_RS07645|lukF	NDTT01000021	82.3	972	166	6	7	975	37315	38283	0	837	1280_12579.fna
USA300HOU_RS07645|lukF	NDTT01000048	77.03	962	191	26	7	953	79147	78201	2e-149	525	1280_12579.fna
USA300HOU_RS07650|lukS	NDTT01000011	100	939	0	0	1	939	39234	40172	0	1735	1280_12579.fna
USA300HOU_RS07650|lukS	NDTT01000048	75.74	643	138	16	169	803	81427	80795	6e-84	307	1280_12579.fna
USA300HOU_RS07645|lukF	JABFKC010000003	100	984	0	0	1	984	425509	424526	0	1818	1280_27505.fna
USA300HOU_RS07645|lukF	JABFKC010000009	82.3	972	166	6	7	975	18439	17471	0	837	1280_27505.fna
USA300HOU_RS07645|lukF	JABFKC010000002	77.03	962	191	26	7	953	79345	78399	2e-149	525	1280_27505.fna
USA300HOU_RS07650|lukS	JABFKC010000003	100	939	0	0	1	939	426443	425505	0	1735	1280_27505.fna
USA300HOU_RS07650|lukS	JABFKC010000002	75.74	643	138	16	169	803	81625	80993	7e-84	307	1280_27505.fna
USA300HOU_RS07645|lukF	RIXP01000002	100	984	0	0	1	984	242079	243062	0	1818	1280_18631.fna
USA300HOU_RS07645|lukF	RIXP01000007	82.3	972	166	6	7	975	37338	38306	0	837	1280_18631.fna
USA300HOU_RS07645|lukF	RIXP01000001	77.03	962	191	26	7	953	380415	379469	2e-149	525	1280_18631.fna
USA300HOU_RS07650|lukS	RIXP01000002	100	939	0	0	1	939	241145	242083	0	1735	1280_18631.fna
USA300HOU_RS07650|lukS	RIXP01000001	75.74	643	138	16	169	803	382695	382063	6e-84	307	1280_18631.fna
USA300HOU_RS07645|lukF	JFSC01000001	100	984	0	0	1	984	602694	601711	0	1818	1421884_3.fna
USA300HOU_RS07645|lukF	JFSC01000007	82.3	972	166	6	7	975	45857	44889	0	837	1421884_3.fna
USA300HOU_RS07645|lukF	JFSC01000003	77.03	962	191	25	7	953	66596	67542	2e-149	525	1421884_3.fna
USA300HOU_RS07650|lukS	JFSC01000001	100	939	0	0	1	939	603628	602690	0	1735	1421884_3.fna
USA300HOU_RS07650|lukS	JFSC01000003	75.74	643	138	16	169	803	64316	64948	7e-84	307	1421884_3.fna
USA300HOU_RS07645|lukF	CGDT01000002	100	984	0	0	1	984	104106	103123	0	1818	1280_4672.contig
USA300HOU_RS07645|lukF	CGDT01000008	82.3	972	166	6	7	975	18569	17601	0	837	1280_4672.contig
USA300HOU_RS07645|lukF	CGDT01000004	77.03	962	191	26	7	953	79207	78261	2e-149	525	1280_4672.contig
USA300HOU_RS07650|lukS	CGDT01000002	100	939	0	0	1	939	105040	104102	0	1735	1280_4672.contig
USA300HOU_RS07650|lukS	CGDT01000004	75.74	643	138	16	169	803	81487	80855	6e-84	307	1280_4672.contig
USA300HOU_RS07645|lukF	JEPD01000006	100	984	0	0	1	984	1000506	999523	0	1818	1412729_3.fna
USA300HOU_RS07645|lukF	JEPD01000006	82.3	972	166	6	7	975	1396450	1395482	0	837	1412729_3.fna
USA300HOU_RS07645|lukF	JEPD01000008	77.03	962	191	25	7	953	250435	251381	2e-149	525	1412729_3.fna
USA300HOU_RS07650|lukS	JEPD01000006	100	939	0	0	1	939	1001440	1000502	0	1735	1412729_3.fna
USA300HOU_RS07650|lukS	JEPD01000008	75.74	643	138	16	169	803	248155	248787	6e-84	307	1412729_3.fna
USA300HOU_RS07645|lukF	CSHP01000002	100	984	0	0	1	984	103475	102492	0	1818	1280_3895.contig
USA300HOU_RS07645|lukF	CSHP01000009	82.3	972	166	6	7	975	37311	38279	0	837	1280_3895.contig
USA300HOU_RS07645|lukF	CSHP01000003	77.03	962	191	26	7	953	79193	78247	2e-149	525	1280_3895.contig
USA300HOU_RS07650|lukS	CSHP01000002	100	939	0	0	1	939	104409	103471	0	1735	1280_3895.contig
USA300HOU_RS07650|lukS	CSHP01000003	75.74	643	138	16	169	803	81473	80841	6e-84	307	1280_3895.contig
USA300HOU_RS07645|lukF	FGBJ01000014	82.2	972	166	7	7	975	37304	38271	0	830	1280_5338.fna
USA300HOU_RS07645|lukF	FGBJ01000009	77.03	962	191	25	7	953	66256	67202	2e-149	525	1280_5338.fna
USA300HOU_RS07650|lukS	FGBJ01000009	75.74	643	138	16	169	803	63975	64607	6e-84	307	1280_5338.fna
USA300HOU_RS07645|lukF	QWKT01000006	82.1	972	168	6	7	975	37349	38317	0	826	1280_18564.fna
USA300HOU_RS07645|lukF	QWKT01000002	77.03	962	191	26	7	953	590468	589522	2e-149	525	1280_18564.fna
USA300HOU_RS07650|lukS	QWKT01000002	75.74	643	138	16	169	803	592749	592117	6e-84	307	1280_18564.fna
USA300HOU_RS07645|lukF	JDGV01000011	82.3	972	166	6	7	975	49571	48603	0	837	1410684_3.fna
USA300HOU_RS07645|lukF	JDGV01000010	77.03	962	191	25	7	953	68435	69381	2e-149	525	1410684_3.fna
USA300HOU_RS07650|lukS	JDGV01000010	75.58	643	139	16	169	803	66154	66786	3e-82	302	1410684_3.fna
USA300HOU_RS07645|lukF	NDNG01000078	100	984	0	0	1	984	242288	243271	0	1818	1280_12609.fna
USA300HOU_RS07645|lukF	NDNG01000066	82.3	972	166	6	7	975	37307	38275	0	837	1280_12609.fna
USA300HOU_RS07645|lukF	NDNG01000051	77.03	962	191	26	7	953	79139	78193	2e-149	525	1280_12609.fna
USA300HOU_RS07650|lukS	NDNG01000078	100	939	0	0	1	939	241354	242292	0	1735	1280_12609.fna
USA300HOU_RS07650|lukS	NDNG01000051	75.74	643	138	16	169	803	81419	80787	6e-84	307	1280_12609.fna
USA300HOU_RS07645|lukF	CSGQ01000003	100	984	0	0	1	984	103474	102491	0	1818	1280_3883.contig
USA300HOU_RS07645|lukF	CSGQ01000009	82.3	972	166	6	7	975	37335	38303	0	837	1280_3883.contig
USA300HOU_RS07645|lukF	CSGQ01000005	77.03	962	191	25	7	953	225631	226577	2e-149	525	1280_3883.contig
USA300HOU_RS07650|lukS	CSGQ01000003	100	939	0	0	1	939	104408	103470	0	1735	1280_3883.contig
USA300HOU_RS07650|lukS	CSGQ01000005	75.74	643	138	16	169	803	223351	223983	6e-84	307	1280_3883.contig
USA300HOU_RS07645|lukF	CSIP01000003	100	984	0	0	1	984	103475	102492	0	1818	1280_3973.contig
USA300HOU_RS07645|lukF	CSIP01000009	82.3	972	166	6	7	975	18402	17434	0	837	1280_3973.contig
USA300HOU_RS07645|lukF	CSIP01000002	77.03	962	191	26	7	953	320763	319817	2e-149	525	1280_3973.contig
USA300HOU_RS07650|lukS	CSIP01000003	100	939	0	0	1	939	104409	103471	0	1735	1280_3973.contig
USA300HOU_RS07650|lukS	CSIP01000002	75.74	643	138	16	169	803	323043	322411	6e-84	307	1280_3973.contig
USA300HOU_RS07645|lukF	CSDL01000002	100	984	0	0	1	984	103459	102476	0	1818	1280_3945.contig
USA300HOU_RS07645|lukF	CSDL01000012	82.3	972	166	6	7	975	37314	38282	0	837	1280_3945.contig
USA300HOU_RS07645|lukF	CSDL01000003	77.03	962	191	26	7	953	79329	78383	2e-149	525	1280_3945.contig
USA300HOU_RS07650|lukS	CSDL01000002	100	939	0	0	1	939	104393	103455	0	1735	1280_3945.contig
USA300HOU_RS07650|lukS	CSDL01000003	75.74	643	138	16	169	803	81609	80977	6e-84	307	1280_3945.contig
USA300HOU_RS07645|lukF	NDLB01000044	100	984	0	0	1	984	2426	1443	0	1818	1280_12300.fna
USA300HOU_RS07645|lukF	NDLB01000064	82.3	972	166	6	7	975	17925	16957	0	837	1280_12300.fna
USA300HOU_RS07645|lukF	NDLB01000016	77.03	962	191	25	7	953	1396	2342	2e-149	525	1280_12300.fna
USA300HOU_RS07650|lukS	NDLB01000044	100	939	0	0	1	939	3360	2422	0	1735	1280_12300.fna
USA300HOU_RS07650|lukS	NDLB01000075	75.74	643	138	16	169	803	258044	258676	6e-84	307	1280_12300.fna
USA300HOU_RS07645|lukF	JABXAC010000003	99.9	984	1	0	1	984	122868	121885	0	1812	1280_28637.fna
USA300HOU_RS07645|lukF	JABXAC010000010	82.3	972	166	6	7	975	37348	38316	0	837	1280_28637.fna
USA300HOU_RS07645|lukF	JABXAC010000007	77.03	962	191	26	7	953	79344	78398	2e-149	525	1280_28637.fna
USA300HOU_RS07650|lukS	JABXAC010000003	100	939	0	0	1	939	123802	122864	0	1735	1280_28637.fna
USA300HOU_RS07650|lukS	JABXAC010000007	75.74	643	138	16	169	803	81624	80992	6e-84	307	1280_28637.fna
USA300HOU_RS07645|lukF	CFOQ01000003	100	984	0	0	1	984	104106	103123	0	1818	1280_4764.contig
USA300HOU_RS07645|lukF	CFOQ01000010	82.3	972	166	6	7	975	18410	17442	0	837	1280_4764.contig
USA300HOU_RS07645|lukF	CFOQ01000004	77.03	962	191	25	7	953	225389	226335	2e-149	525	1280_4764.contig
USA300HOU_RS07650|lukS	CFOQ01000003	100	939	0	0	1	939	105040	104102	0	1735	1280_4764.contig
USA300HOU_RS07650|lukS	CFOQ01000004	75.74	643	138	16	169	803	223109	223741	6e-84	307	1280_4764.contig
USA300HOU_RS07645|lukF	CYNI01000001	100	984	0	0	1	984	830220	829237	0	1818	1280_4504.contig
USA300HOU_RS07645|lukF	CYNI01000007	82.3	972	166	6	7	975	37309	38277	0	837	1280_4504.contig
USA300HOU_RS07645|lukF	CYNI01000003	77.03	962	191	26	7	953	79654	78708	2e-149	525	1280_4504.contig
USA300HOU_RS07650|lukS	CYNI01000001	100	939	0	0	1	939	831154	830216	0	1735	1280_4504.contig
USA300HOU_RS07650|lukS	CYNI01000003	75.74	643	138	16	169	803	81934	81302	6e-84	307	1280_4504.contig
USA300HOU_RS07645|lukF	MUDY01000043	82.1	972	168	6	7	975	4487	5455	0	826	1280_11650.fna
USA300HOU_RS07645|lukF	MUDY01000009	77.03	962	191	25	7	953	66099	67045	2e-149	525	1280_11650.fna
USA300HOU_RS07650|lukS	MUDY01000009	75.74	643	138	16	169	803	63818	64450	6e-84	307	1280_11650.fna
USA300HOU_RS07645|lukF	NDVQ01000020	82.3	972	166	6	7	975	11773	10805	0	837	1280_12598.fna
USA300HOU_RS07645|lukF	NDVQ01000046	77.03	962	191	26	7	953	79137	78191	2e-149	525	1280_12598.fna
USA300HOU_RS07650|lukS	NDVQ01000046	75.74	643	138	16	169	803	81438	80806	6e-84	307	1280_12598.fna
USA300HOU_RS07645|lukF	CYMI01000003	100	984	0	0	1	984	103445	102462	0	1818	1280_4456.contig
USA300HOU_RS07645|lukF	CYMI01000008	82.3	972	166	6	7	975	73335	72367	0	837	1280_4456.contig
USA300HOU_RS07645|lukF	CYMI01000004	77.03	962	191	26	7	953	79284	78338	2e-149	525	1280_4456.contig
USA300HOU_RS07650|lukS	CYMI01000003	100	939	0	0	1	939	104379	103441	0	1735	1280_4456.contig
USA300HOU_RS07650|lukS	CYMI01000004	75.74	643	138	16	169	803	81564	80932	6e-84	307	1280_4456.contig
USA300HOU_RS07645|lukF	JFTZ01000002	100	984	0	0	1	984	91406	90423	0	1818	1421858_3.fna
USA300HOU_RS07645|lukF	JFTZ01000013	82.3	972	166	6	7	975	45249	44281	0	837	1421858_3.fna
USA300HOU_RS07645|lukF	JFTZ01000003	77.03	962	191	25	7	953	251949	252895	2e-149	525	1421858_3.fna
USA300HOU_RS07650|lukS	JFTZ01000002	100	939	0	0	1	939	92340	91402	0	1735	1421858_3.fna
USA300HOU_RS07650|lukS	JFTZ01000003	75.74	643	138	16	169	803	249669	250301	7e-84	307	1421858_3.fna
USA300HOU_RS07645|lukF	LFUY01000001	100	984	0	0	1	984	88031	87048	0	1818	46170_164.fna
USA300HOU_RS07645|lukF	LFUY01000016	82.3	972	166	6	7	975	37317	38285	0	837	46170_164.fna
USA300HOU_RS07645|lukF	LFUY01000004	77.03	962	191	26	7	953	79218	78272	2e-149	525	46170_164.fna
USA300HOU_RS07650|lukS	LFUY01000001	100	939	0	0	1	939	88965	88027	0	1735	46170_164.fna
USA300HOU_RS07650|lukS	LFUY01000004	75.74	643	138	16	169	803	81498	80866	6e-84	307	46170_164.fna
USA300HOU_RS07645|lukF	CP029667	100	984	0	0	1	984	1285482	1286465	0	1818	1280_16556.fna
USA300HOU_RS07645|lukF	CP029667	82.3	972	166	6	7	975	898314	899282	0	837	1280_16556.fna
USA300HOU_RS07645|lukF	CP029667	77.03	962	191	26	7	953	268037	267091	2e-149	525	1280_16556.fna
USA300HOU_RS07650|lukS	CP029667	100	939	0	0	1	939	1284548	1285486	0	1735	1280_16556.fna
USA300HOU_RS07650|lukS	CP029667	75.74	643	138	16	169	803	270317	269685	6e-84	307	1280_16556.fna
USA300HOU_RS07645|lukF	CYJO01000003	100	984	0	0	1	984	242701	243684	0	1818	1280_4429.contig
USA300HOU_RS07645|lukF	CYJO01000011	82.3	972	166	6	7	975	41320	42288	0	837	1280_4429.contig
USA300HOU_RS07645|lukF	CYJO01000007	77.03	962	191	25	7	953	66254	67200	2e-149	525	1280_4429.contig
USA300HOU_RS07650|lukS	CYJO01000003	100	939	0	0	1	939	241767	242705	0	1735	1280_4429.contig
USA300HOU_RS07650|lukS	CYJO01000007	75.74	643	138	16	169	803	63974	64606	6e-84	307	1280_4429.contig
USA300HOU_RS07645|lukF	JBGU01000001	100	984	0	0	1	984	938543	937560	0	1818	1409689_3.fna
USA300HOU_RS07645|lukF	JBGU01000001	82.3	972	166	6	7	975	1334488	1333520	0	837	1409689_3.fna
USA300HOU_RS07645|lukF	JBGU01000002	77.03	962	191	25	7	953	365255	366201	2e-149	525	1409689_3.fna
USA300HOU_RS07650|lukS	JBGU01000001	100	939	0	0	1	939	939477	938539	0	1735	1409689_3.fna
USA300HOU_RS07650|lukS	JBGU01000002	75.74	643	138	16	169	803	362975	363607	7e-84	307	1409689_3.fna
USA300HOU_RS07645|lukF	1280.4977.con.0024	100	984	0	0	1	984	350097	351080	0	1818	1280_4977.fna
USA300HOU_RS07645|lukF	1280.4977.con.0014	82.3	972	166	6	7	975	37364	38332	0	837	1280_4977.fna
USA300HOU_RS07645|lukF	1280.4977.con.0003	77.03	962	191	25	7	953	248501	249447	2e-149	525	1280_4977.fna
USA300HOU_RS07650|lukS	1280.4977.con.0024	100	939	0	0	1	939	349163	350101	0	1735	1280_4977.fna
USA300HOU_RS07650|lukS	1280.4977.con.0003	75.74	643	138	16	169	803	246221	246853	6e-84	307	1280_4977.fna
USA300HOU_RS07645|lukF	KV839922	100	984	0	0	1	984	103530	102547	0	1818	1608879_4.fna
USA300HOU_RS07645|lukF	KV839889	82.3	972	166	6	7	975	4500	5468	0	837	1608879_4.fna
USA300HOU_RS07645|lukF	KV839903	77.03	962	191	26	7	953	79210	78264	2e-149	525	1608879_4.fna
USA300HOU_RS07650|lukS	KV839922	100	939	0	0	1	939	104464	103526	0	1735	1608879_4.fna
USA300HOU_RS07650|lukS	KV839903	75.74	643	138	16	169	803	81490	80858	6e-84	307	1608879_4.fna
USA300HOU_RS07645|lukF	JDNI01000011	82.3	972	166	6	7	975	19491	18523	0	837	1410879_3.fna
USA300HOU_RS07645|lukF	JDNI01000002	77.03	962	191	25	7	953	247168	248114	2e-149	525	1410879_3.fna
USA300HOU_RS07650|lukS	JDNI01000002	75.74	643	138	16	169	803	244888	245520	6e-84	307	1410879_3.fna
USA300HOU_RS07645|lukF	1280.9977.con.0021	82	972	169	6	7	975	15843	14875	0	821	1280_9977.fna
USA300HOU_RS07645|lukF	1280.9977.con.0005	77.03	962	191	25	7	953	65889	66835	2e-149	525	1280_9977.fna
USA300HOU_RS07650|lukS	1280.9977.con.0005	75.74	643	138	16	169	803	63608	64240	6e-84	307	1280_9977.fna
USA300HOU_RS07645|lukF	JDGT01000008	82.3	972	166	6	7	975	21144	20176	0	837	1411549_3.fna
USA300HOU_RS07645|lukF	JDGT01000002	77.03	962	191	25	7	953	365242	366188	2e-149	525	1411549_3.fna
USA300HOU_RS07650|lukS	JDGT01000002	75.74	643	138	16	169	803	362962	363594	6e-84	307	1411549_3.fna
USA300HOU_RS07645|lukF	CYMQ01000002	100	984	0	0	1	984	350046	351029	0	1818	1280_4376.contig
USA300HOU_RS07645|lukF	CYMQ01000010	82.3	972	166	6	7	975	18417	17449	0	837	1280_4376.contig
USA300HOU_RS07645|lukF	CYMQ01000003	77.03	962	191	26	7	953	79289	78343	2e-149	525	1280_4376.contig
USA300HOU_RS07650|lukS	CYMQ01000002	100	939	0	0	1	939	349112	350050	0	1735	1280_4376.contig
USA300HOU_RS07650|lukS	CYMQ01000003	75.74	643	138	16	169	803	81569	80937	6e-84	307	1280_4376.contig
USA300HOU_RS07645|lukF	CP010299	100	984	0	0	1	984	1547150	1546167	0	1818	1280_2219.fna
USA300HOU_RS07645|lukF	CP010299	82.3	972	166	6	7	975	1956295	1955327	0	837	1280_2219.fna
USA300HOU_RS07645|lukF	CP010299	77.03	962	191	25	7	953	2544591	2545537	2e-149	525	1280_2219.fna
USA300HOU_RS07650|lukS	CP010299	100	939	0	0	1	939	1548084	1547146	0	1735	1280_2219.fna
USA300HOU_RS07650|lukS	CP010299	75.74	643	138	16	169	803	2542311	2542943	6e-84	307	1280_2219.fna
USA300HOU_RS07645|lukF	JBKA01000011	82.3	972	166	6	7	975	39056	38088	0	837	1409592_3.fna
USA300HOU_RS07645|lukF	JBKA01000001	77.03	962	191	25	7	953	247250	248196	2e-149	525	1409592_3.fna
USA300HOU_RS07650|lukS	JBKA01000001	75.58	643	139	16	169	803	244969	245601	3e-82	302	1409592_3.fna
USA300HOU_RS07645|lukF	JGGZ01000003	100	984	0	0	1	984	180432	179449	0	1818	1418339_3.fna
USA300HOU_RS07645|lukF	JGGZ01000012	82.3	972	166	6	7	975	45167	44199	0	837	1418339_3.fna
USA300HOU_RS07645|lukF	JGGZ01000013	77.03	962	191	25	7	953	66306	67252	2e-149	525	1418339_3.fna
USA300HOU_RS07650|lukS	JGGZ01000003	100	939	0	0	1	939	181366	180428	0	1735	1418339_3.fna
USA300HOU_RS07650|lukS	JGGZ01000013	75.74	643	138	16	169	803	64026	64658	6e-84	307	1418339_3.fna
USA300HOU_RS07645|lukF	JDYL01000001	100	984	0	0	1	984	1493664	1492681	0	1818	1412807_3.fna
USA300HOU_RS07645|lukF	JDYL01000001	82.3	972	166	6	7	975	1889609	1888641	0	837	1412807_3.fna
USA300HOU_RS07645|lukF	JDYL01000002	77.03	962	191	25	7	953	365255	366201	2e-149	525	1412807_3.fna
USA300HOU_RS07650|lukS	JDYL01000001	100	939	0	0	1	939	1494598	1493660	0	1735	1412807_3.fna
USA300HOU_RS07650|lukS	JDYL01000002	75.74	643	138	16	169	803	362975	363607	6e-84	307	1412807_3.fna
USA300HOU_RS07645|lukF	1280.10027.con.0020	82.2	972	167	6	7	975	15118	14150	0	832	1280_10027.fna
USA300HOU_RS07645|lukF	1280.10027.con.0007	77.03	962	191	25	7	953	69064	70010	2e-149	525	1280_10027.fna
USA300HOU_RS07650|lukS	1280.10027.con.0007	75.74	643	138	16	169	803	66783	67415	6e-84	307	1280_10027.fna
USA300HOU_RS07645|lukF	CSDZ01000002	100	984	0	0	1	984	103474	102491	0	1818	1280_3850.contig
USA300HOU_RS07645|lukF	CSDZ01000012	82.3	972	166	6	7	975	18430	17462	0	837	1280_3850.contig
USA300HOU_RS07645|lukF	CSDZ01000007	77.03	962	191	26	7	953	79771	78825	2e-149	525	1280_3850.contig
USA300HOU_RS07650|lukS	CSDZ01000002	100	939	0	0	1	939	104408	103470	0	1735	1280_3850.contig
USA300HOU_RS07650|lukS	CSDZ01000007	75.74	643	138	16	169	803	82051	81419	7e-84	307	1280_3850.contig
USA300HOU_RS07645|lukF	BEDF01000009	82.2	972	167	6	7	975	37914	38882	0	832	1280_17949.fna
USA300HOU_RS07645|lukF	BEDF01000001	77.03	962	191	25	7	953	226355	227301	2e-149	525	1280_17949.fna
USA300HOU_RS07650|lukS	BEDF01000001	75.74	643	138	16	169	803	224074	224706	6e-84	307	1280_17949.fna
USA300HOU_RS07645|lukF	CP020619	100	984	0	0	1	984	1562039	1561056	0	1818	1280_12234.fna
USA300HOU_RS07645|lukF	CP020619	82.3	972	166	6	7	975	1957984	1957016	0	837	1280_12234.fna
USA300HOU_RS07645|lukF	CP020619	77.03	962	191	25	7	953	2545667	2546613	2e-149	525	1280_12234.fna
USA300HOU_RS07650|lukS	CP020619	100	939	0	0	1	939	1562973	1562035	0	1735	1280_12234.fna
USA300HOU_RS07650|lukS	CP020619	75.74	643	138	16	169	803	2543387	2544019	6e-84	307	1280_12234.fna
USA300HOU_RS07645|lukF	JDGU01000001	100	984	0	0	1	984	683142	682159	0	1818	1411559_3.fna
USA300HOU_RS07645|lukF	JDGU01000010	82.3	972	166	6	7	975	19491	18523	0	837	1411559_3.fna
USA300HOU_RS07645|lukF	JDGU01000006	77.03	962	191	25	7	953	66278	67224	2e-149	525	1411559_3.fna
USA300HOU_RS07650|lukS	JDGU01000001	100	939	0	0	1	939	684076	683138	0	1735	1411559_3.fna
USA300HOU_RS07650|lukS	JDGU01000006	75.74	643	138	16	169	803	63998	64630	6e-84	307	1411559_3.fna
USA300HOU_RS07645|lukF	JDYB01000004	99.8	984	1	1	1	984	1086643	1085661	0	1805	1409512_3.fna
USA300HOU_RS07645|lukF	JDYB01000004	82.3	972	166	6	7	975	1482588	1481620	0	837	1409512_3.fna
USA300HOU_RS07645|lukF	JDYB01000007	76.92	962	192	25	7	953	250221	251167	8e-148	520	1409512_3.fna
USA300HOU_RS07650|lukS	JDYB01000004	100	939	0	0	1	939	1087577	1086639	0	1735	1409512_3.fna
USA300HOU_RS07650|lukS	JDYB01000007	75.74	643	138	16	169	803	247941	248573	7e-84	307	1409512_3.fna
USA300HOU_RS07645|lukF	CP010296	100	984	0	0	1	984	1547150	1546167	0	1818	1280_2216.fna
USA300HOU_RS07645|lukF	CP010296	82.3	972	166	6	7	975	1956295	1955327	0	837	1280_2216.fna
USA300HOU_RS07645|lukF	CP010296	77.03	962	191	25	7	953	2544587	2545533	2e-149	525	1280_2216.fna
USA300HOU_RS07650|lukS	CP010296	100	939	0	0	1	939	1548084	1547146	0	1735	1280_2216.fna
USA300HOU_RS07650|lukS	CP010296	75.74	643	138	16	169	803	2542307	2542939	6e-84	307	1280_2216.fna
USA300HOU_RS07645|lukF	LRNC01000036	82.3	972	166	6	7	975	17956	16988	0	837	46170_200.fna
USA300HOU_RS07645|lukF	LRNC01000046	77.03	962	191	26	7	953	79122	78176	2e-149	525	46170_200.fna
USA300HOU_RS07650|lukS	LRNC01000046	75.74	643	138	16	169	803	81403	80771	6e-84	307	46170_200.fna
USA300HOU_RS07645|lukF	KI974492	82.3	972	166	6	7	975	17345	16377	0	837	1409436_3.fna
USA300HOU_RS07645|lukF	KI974486	77.03	962	191	25	7	953	365194	366140	2e-149	525	1409436_3.fna
USA300HOU_RS07650|lukS	KI974486	75.74	643	138	16	169	803	362913	363545	6e-84	307	1409436_3.fna
USA300HOU_RS07645|lukF	CHEU01000002	100	984	0	0	1	984	103475	102492	0	1818	1280_4773.contig
USA300HOU_RS07645|lukF	CHEU01000013	82.3	972	166	6	7	975	37309	38277	0	837	1280_4773.contig
USA300HOU_RS07645|lukF	CHEU01000009	77.03	962	191	26	7	953	35858	34912	2e-149	525	1280_4773.contig
USA300HOU_RS07650|lukS	CHEU01000002	100	939	0	0	1	939	104409	103471	0	1735	1280_4773.contig
USA300HOU_RS07650|lukS	CHEU01000009	75.74	643	138	16	169	803	38138	37506	6e-84	307	1280_4773.contig
USA300HOU_RS07645|lukF	JEPT01000002	100	984	0	0	1	984	938972	937989	0	1818	1417034_3.fna
USA300HOU_RS07645|lukF	JEPT01000002	82.3	972	166	6	7	975	1334857	1333889	0	837	1417034_3.fna
USA300HOU_RS07645|lukF	JEPT01000004	77.03	962	191	25	7	953	66278	67224	2e-149	525	1417034_3.fna
USA300HOU_RS07650|lukS	JEPT01000002	100	939	0	0	1	939	939906	938968	0	1735	1417034_3.fna
USA300HOU_RS07650|lukS	JEPT01000004	75.74	643	138	16	169	803	63998	64630	6e-84	307	1417034_3.fna
USA300HOU_RS07645|lukF	LOSC01000004	100	984	0	0	1	984	1750542	1749559	0	1818	1280_4860.fna
USA300HOU_RS07645|lukF	LOSC01000004	82.3	972	166	6	7	975	2146488	2145520	0	837	1280_4860.fna
USA300HOU_RS07645|lukF	LOSC01000004	77.03	962	191	25	7	953	2734079	2735025	2e-149	525	1280_4860.fna
USA300HOU_RS07650|lukS	LOSC01000004	100	939	0	0	1	939	1751476	1750538	0	1735	1280_4860.fna
USA300HOU_RS07650|lukS	LOSC01000004	75.74	643	138	16	169	803	2731799	2732431	7e-84	307	1280_4860.fna
USA300HOU_RS07645|lukF	1280.8124.con.0025	84.83	613	89	4	7	617	14464	13854	3e-176	614	1280_8124.fna
USA300HOU_RS07645|lukF	1280.8124.con.0007	77.03	962	191	25	7	953	65905	66851	2e-149	525	1280_8124.fna
USA300HOU_RS07650|lukS	1280.8124.con.0007	75.74	643	138	16	169	803	63624	64256	6e-84	307	1280_8124.fna
USA300HOU_RS07645|lukF	JBRA01000001	100	984	0	0	1	984	938432	937449	0	1818	1409487_3.fna
USA300HOU_RS07645|lukF	JBRA01000001	82.3	972	166	6	7	975	1334378	1333410	0	837	1409487_3.fna
USA300HOU_RS07645|lukF	JBRA01000002	77.03	962	191	25	7	953	365254	366200	2e-149	525	1409487_3.fna
USA300HOU_RS07650|lukS	JBRA01000001	100	939	0	0	1	939	939366	938428	0	1735	1409487_3.fna
USA300HOU_RS07650|lukS	JBRA01000002	75.74	643	138	16	169	803	362974	363606	6e-84	307	1409487_3.fna
USA300HOU_RS07645|lukF	CSJT01000009	82.3	972	166	6	7	975	37319	38287	0	837	1280_3805.contig
USA300HOU_RS07645|lukF	CSJT01000005	77.03	962	191	26	7	953	79318	78372	2e-149	525	1280_3805.contig
USA300HOU_RS07650|lukS	CSJT01000005	75.74	643	138	16	169	803	81599	80967	6e-84	307	1280_3805.contig
USA300HOU_RS07645|lukF	CHEY01000002	100	984	0	0	1	984	103475	102492	0	1818	1280_4668.contig
USA300HOU_RS07645|lukF	CHEY01000012	82.3	972	166	6	7	975	18396	17428	0	837	1280_4668.contig
USA300HOU_RS07645|lukF	CHEY01000007	77.03	962	191	25	7	953	65739	66685	2e-149	525	1280_4668.contig
USA300HOU_RS07650|lukS	CHEY01000002	100	939	0	0	1	939	104409	103471	0	1735	1280_4668.contig
USA300HOU_RS07650|lukS	CHEY01000007	75.74	643	138	16	169	803	63459	64091	6e-84	307	1280_4668.contig
USA300HOU_RS07645|lukF	JETA01000006	82.3	972	166	6	7	975	353351	352383	0	837	1417179_3.fna
USA300HOU_RS07645|lukF	JETA01000003	77.03	962	191	25	7	953	363499	364445	2e-149	525	1417179_3.fna
USA300HOU_RS07650|lukS	JETA01000003	75.74	643	138	16	169	803	361219	361851	6e-84	307	1417179_3.fna
USA300HOU_RS07645|lukF	KV840279	100	984	0	0	1	984	40196	41179	0	1818	1608888_3.fna
USA300HOU_RS07645|lukF	KV840228	82.3	972	166	6	7	975	4500	5468	0	837	1608888_3.fna
USA300HOU_RS07645|lukF	KV840259	76.92	962	192	25	7	953	65942	66888	8e-148	520	1608888_3.fna
USA300HOU_RS07650|lukS	KV840279	100	939	0	0	1	939	39262	40200	0	1735	1608888_3.fna
USA300HOU_RS07650|lukS	KV840259	75.74	643	138	16	169	803	63662	64294	6e-84	307	1608888_3.fna
USA300HOU_RS07645|lukF	CYJJ01000003	100	984	0	0	1	984	103439	102456	0	1818	1280_4497.contig
USA300HOU_RS07645|lukF	CYJJ01000009	82.3	972	166	6	7	975	41427	42395	0	837	1280_4497.contig
USA300HOU_RS07645|lukF	CYJJ01000002	77.03	962	191	25	7	953	247031	247977	2e-149	525	1280_4497.contig
USA300HOU_RS07650|lukS	CYJJ01000003	100	939	0	0	1	939	104373	103435	0	1735	1280_4497.contig
USA300HOU_RS07650|lukS	CYJJ01000002	75.74	643	138	16	169	803	244751	245383	6e-84	307	1280_4497.contig
USA300HOU_RS07645|lukF	AYXX01000023	82.3	972	166	6	7	975	18471	17503	0	837	1387328_3.fna
USA300HOU_RS07645|lukF	AYXX01000003	77.03	962	191	25	7	953	93326	94272	2e-149	525	1387328_3.fna
USA300HOU_RS07650|lukS	AYXX01000003	75.74	643	138	16	169	803	91046	91678	6e-84	307	1387328_3.fna
USA300HOU_RS07645|lukF	JDZA01000001	100	984	0	0	1	984	655343	654360	0	1818	1412714_3.fna
USA300HOU_RS07645|lukF	JDZA01000001	82.3	972	166	6	7	975	1051279	1050311	0	837	1412714_3.fna
USA300HOU_RS07645|lukF	JDZA01000002	77.03	962	191	25	7	953	365254	366200	2e-149	525	1412714_3.fna
USA300HOU_RS07650|lukS	JDZA01000001	100	939	0	0	1	939	656277	655339	0	1735	1412714_3.fna
USA300HOU_RS07650|lukS	JDZA01000002	75.74	643	138	16	169	803	362974	363606	6e-84	307	1412714_3.fna
USA300HOU_RS07645|lukF	JACGYQ010000013	82.2	972	167	6	7	975	39968	40936	0	832	1280_28630.fna
USA300HOU_RS07645|lukF	JACGYQ010000002	77.03	962	191	25	7	953	247491	248437	2e-149	525	1280_28630.fna
USA300HOU_RS07650|lukS	JACGYQ010000002	75.74	643	138	16	169	803	245210	245842	6e-84	307	1280_28630.fna
USA300HOU_RS07645|lukF	NDTU01000056	100	984	0	0	1	984	103452	102469	0	1818	1280_12580.fna
USA300HOU_RS07645|lukF	NDTU01000019	82.3	972	166	6	7	975	17980	17012	0	837	1280_12580.fna
USA300HOU_RS07645|lukF	NDTU01000054	77.03	962	191	25	7	953	225497	226443	2e-149	525	1280_12580.fna
USA300HOU_RS07650|lukS	NDTU01000056	100	939	0	0	1	939	104386	103448	0	1735	1280_12580.fna
USA300HOU_RS07650|lukS	NDTU01000054	75.74	643	138	16	169	803	223217	223849	6e-84	307	1280_12580.fna
USA300HOU_RS07645|lukF	JGHI01000004	99.9	984	1	0	1	984	91152	90169	0	1812	1418384_3.fna
USA300HOU_RS07645|lukF	JGHI01000007	82.3	972	166	6	7	975	45017	44049	0	837	1418384_3.fna
USA300HOU_RS07645|lukF	JGHI01000002	77.03	962	191	25	7	953	250247	251193	2e-149	525	1418384_3.fna
USA300HOU_RS07650|lukS	JGHI01000004	100	939	0	0	1	939	92086	91148	0	1735	1418384_3.fna
USA300HOU_RS07650|lukS	JGHI01000002	75.74	643	137	17	169	803	247968	248599	2e-83	305	1418384_3.fna
USA300HOU_RS07645|lukF	JDYG01000001	100	984	0	0	1	984	999467	998484	0	1818	1409426_3.fna
USA300HOU_RS07645|lukF	JDYG01000002	82.3	972	166	6	7	975	37059	36091	0	837	1409426_3.fna
USA300HOU_RS07645|lukF	JDYG01000002	77.03	962	191	25	7	953	624683	625629	2e-149	525	1409426_3.fna
USA300HOU_RS07650|lukS	JDYG01000001	100	939	0	0	1	939	1000401	999463	0	1735	1409426_3.fna
USA300HOU_RS07650|lukS	JDYG01000002	75.74	643	138	16	169	803	622403	623035	6e-84	307	1409426_3.fna
USA300HOU_RS07645|lukF	KZ789823	82.3	972	166	6	7	975	16741	15773	0	837	1280_16398.fna
USA300HOU_RS07645|lukF	KZ789803	77.03	962	191	25	7	953	112843	113789	2e-149	525	1280_16398.fna
USA300HOU_RS07650|lukS	KZ789803	75.58	643	139	16	169	803	110582	111214	3e-82	302	1280_16398.fna
USA300HOU_RS07645|lukF	JABFLG010000004	100	984	0	0	1	984	103500	102517	0	1818	1280_27478.fna
USA300HOU_RS07645|lukF	JABFLG010000009	82.3	972	166	6	7	975	18439	17471	0	837	1280_27478.fna
USA300HOU_RS07645|lukF	JABFLG010000002	77.03	962	191	25	7	953	66117	67063	2e-149	525	1280_27478.fna
USA300HOU_RS07650|lukS	JABFLG010000004	100	939	0	0	1	939	104434	103496	0	1735	1280_27478.fna
USA300HOU_RS07650|lukS	JABFLG010000002	75.74	643	138	16	169	803	63837	64469	6e-84	307	1280_27478.fna
USA300HOU_RS07645|lukF	CSCI01000003	100	984	0	0	1	984	243003	243986	0	1818	1280_3835.contig
USA300HOU_RS07645|lukF	CSCI01000009	82.3	972	166	6	7	975	19491	18523	0	837	1280_3835.contig
USA300HOU_RS07645|lukF	CSCI01000004	77.03	962	191	26	7	953	79172	78226	2e-149	525	1280_3835.contig
USA300HOU_RS07650|lukS	CSCI01000003	100	939	0	0	1	939	242069	243007	0	1735	1280_3835.contig
USA300HOU_RS07650|lukS	CSCI01000004	75.74	643	138	16	169	803	81452	80820	6e-84	307	1280_3835.contig
USA300HOU_RS07645|lukF	CYMG01000002	100	984	0	0	1	984	123213	122230	0	1818	1280_4396.contig
USA300HOU_RS07645|lukF	CYMG01000009	82.3	972	166	6	7	975	73362	72394	0	837	1280_4396.contig
USA300HOU_RS07645|lukF	CYMG01000007	77.03	962	191	26	7	953	79276	78330	2e-149	525	1280_4396.contig
USA300HOU_RS07650|lukS	CYMG01000002	100	939	0	0	1	939	124147	123209	0	1735	1280_4396.contig
USA300HOU_RS07650|lukS	CYMG01000007	75.74	643	138	16	169	803	81556	80924	6e-84	307	1280_4396.contig
USA300HOU_RS07645|lukF	CP014429	100	984	0	0	1	984	1604689	1603706	0	1818	1280_11685.fna
USA300HOU_RS07645|lukF	CP014429	82.3	972	166	6	7	975	2003919	2002951	0	837	1280_11685.fna
USA300HOU_RS07645|lukF	CP014429	77.03	962	191	25	7	953	2591704	2592650	2e-149	525	1280_11685.fna
USA300HOU_RS07650|lukS	CP014429	100	939	0	0	1	939	1605623	1604685	0	1735	1280_11685.fna
USA300HOU_RS07650|lukS	CP014429	75.74	643	138	16	169	803	2589424	2590056	7e-84	307	1280_11685.fna
USA300HOU_RS07645|lukF	OFXG01000042	100	984	0	0	1	984	242137	243120	0	1818	1280_16235.fna
USA300HOU_RS07645|lukF	OFXG01000010	82.3	972	166	6	7	975	37311	38279	0	837	1280_16235.fna
USA300HOU_RS07645|lukF	OFXG01000061	77.03	962	191	26	7	953	79140	78194	2e-149	525	1280_16235.fna
USA300HOU_RS07650|lukS	OFXG01000042	100	939	0	0	1	939	241203	242141	0	1735	1280_16235.fna
USA300HOU_RS07650|lukS	OFXG01000061	75.74	643	138	16	169	803	81471	80839	6e-84	307	1280_16235.fna
USA300HOU_RS07645|lukF	NDLS01000029	100	984	0	0	1	984	102394	101411	0	1818	1280_12312.fna
USA300HOU_RS07645|lukF	NDLS01000050	82.3	972	166	6	7	975	18394	17426	0	837	1280_12312.fna
USA300HOU_RS07645|lukF	NDLS01000059	77.03	962	191	26	7	953	79143	78197	2e-149	525	1280_12312.fna
USA300HOU_RS07650|lukS	NDLS01000029	100	939	0	0	1	939	103328	102390	0	1735	1280_12312.fna
USA300HOU_RS07650|lukS	NDLS01000059	75.74	643	138	16	169	803	81423	80791	6e-84	307	1280_12312.fna
USA300HOU_RS07645|lukF	CP047789	82.3	972	166	6	7	975	152105	153073	0	837	1280_24280.fna
USA300HOU_RS07645|lukF	CP047789	77.03	962	191	26	7	953	2368516	2367570	2e-149	525	1280_24280.fna
USA300HOU_RS07650|lukS	CP047789	75.58	643	139	16	169	803	2370797	2370165	3e-82	302	1280_24280.fna
USA300HOU_RS07645|lukF	JBGK01000002	100	984	0	0	1	984	712301	711318	0	1818	1409699_3.fna
USA300HOU_RS07645|lukF	JBGK01000002	82.3	972	166	6	7	975	1108246	1107278	0	837	1409699_3.fna
USA300HOU_RS07645|lukF	JBGK01000004	77.03	962	191	25	7	953	333587	334533	2e-149	525	1409699_3.fna
USA300HOU_RS07650|lukS	JBGK01000002	99.89	939	1	0	1	939	713235	712297	0	1729	1409699_3.fna
USA300HOU_RS07650|lukS	JBGK01000004	75.74	643	138	16	169	803	331307	331939	6e-84	307	1409699_3.fna
USA300HOU_RS07645|lukF	CSFS01000003	100	984	0	0	1	984	104106	103123	0	1818	1280_3897.contig
USA300HOU_RS07645|lukF	CSFS01000009	82.3	972	166	6	7	975	37315	38283	0	837	1280_3897.contig
USA300HOU_RS07645|lukF	CSFS01000004	77.03	962	191	26	7	953	79311	78365	2e-149	525	1280_3897.contig
USA300HOU_RS07650|lukS	CSFS01000003	100	939	0	0	1	939	105040	104102	0	1735	1280_3897.contig
USA300HOU_RS07650|lukS	CSFS01000004	75.74	643	138	16	169	803	81591	80959	6e-84	307	1280_3897.contig
USA300HOU_RS07645|lukF	JEPK01000003	100	984	0	0	1	984	118134	117151	0	1818	1412744_3.fna
USA300HOU_RS07645|lukF	JEPK01000003	82.3	972	166	6	7	975	514080	513112	0	837	1412744_3.fna
USA300HOU_RS07645|lukF	JEPK01000005	77.03	962	191	25	7	953	248726	249672	2e-149	525	1412744_3.fna
USA300HOU_RS07650|lukS	JEPK01000003	100	939	0	0	1	939	119068	118130	0	1735	1412744_3.fna
USA300HOU_RS07650|lukS	JEPK01000005	75.74	643	138	16	169	803	246446	247078	7e-84	307	1412744_3.fna
USA300HOU_RS07645|lukF	OFWJ01000022	98.99	994	0	1	1	984	123294	122301	0	1772	1280_16258.fna
USA300HOU_RS07645|lukF	OFWJ01000020	82.3	972	166	6	7	975	37903	38871	0	837	1280_16258.fna
USA300HOU_RS07645|lukF	OFWJ01000030	77.03	962	191	25	7	953	231651	232597	2e-149	525	1280_16258.fna
USA300HOU_RS07650|lukS	OFWJ01000022	100	939	0	0	1	939	124228	123290	0	1735	1280_16258.fna
USA300HOU_RS07650|lukS	OFWJ01000030	75.74	643	138	16	169	803	229371	230003	6e-84	307	1280_16258.fna
USA300HOU_RS07645|lukF	CP010295	100	984	0	0	1	984	1547150	1546167	0	1818	1280_2215.fna
USA300HOU_RS07645|lukF	CP010295	82.3	972	166	6	7	975	1956295	1955327	0	837	1280_2215.fna
USA300HOU_RS07645|lukF	CP010295	77.03	962	191	25	7	953	2544578	2545524	2e-149	525	1280_2215.fna
USA300HOU_RS07650|lukS	CP010295	100	939	0	0	1	939	1548084	1547146	0	1735	1280_2215.fna
USA300HOU_RS07650|lukS	CP010295	75.74	643	138	16	169	803	2542298	2542930	6e-84	307	1280_2215.fna
USA300HOU_RS07645|lukF	CFOZ01000003	100	984	0	0	1	984	103472	102489	0	1818	1280_4722.contig
USA300HOU_RS07645|lukF	CFOZ01000010	82.3	972	166	6	7	975	18410	17442	0	837	1280_4722.contig
USA300HOU_RS07645|lukF	CFOZ01000004	77.03	962	191	26	7	953	79167	78221	2e-149	525	1280_4722.contig
USA300HOU_RS07650|lukS	CFOZ01000003	100	939	0	0	1	939	104406	103468	0	1735	1280_4722.contig
USA300HOU_RS07650|lukS	CFOZ01000004	75.74	643	138	16	169	803	81447	80815	6e-84	307	1280_4722.contig
USA300HOU_RS07645|lukF	JDJD01000003	100	984	0	0	1	984	812143	811160	0	1818	1410755_3.fna
USA300HOU_RS07645|lukF	JDJD01000003	82.3	972	166	6	7	975	1208090	1207122	0	837	1410755_3.fna
USA300HOU_RS07645|lukF	JDJD01000003	77.03	962	191	25	7	953	1795772	1796718	2e-149	525	1410755_3.fna
USA300HOU_RS07650|lukS	JDJD01000003	100	939	0	0	1	939	813077	812139	0	1735	1410755_3.fna
USA300HOU_RS07650|lukS	JDJD01000003	75.74	643	138	16	169	803	1793492	1794124	6e-84	307	1410755_3.fna
USA300HOU_RS07645|lukF	JGKL01000006	100	984	0	0	1	984	91120	90137	0	1818	1418341_3.fna
USA300HOU_RS07645|lukF	JGKL01000008	82.3	972	166	6	7	975	152543	151575	0	837	1418341_3.fna
USA300HOU_RS07645|lukF	JGKL01000001	77.03	962	191	25	7	953	365479	366425	2e-149	525	1418341_3.fna
USA300HOU_RS07650|lukS	JGKL01000006	100	939	0	0	1	939	92054	91116	0	1735	1418341_3.fna
USA300HOU_RS07650|lukS	JGKL01000001	75.74	643	138	16	169	803	363199	363831	6e-84	307	1418341_3.fna
USA300HOU_RS07645|lukF	JYAA01000002	82.1	972	168	6	7	975	782405	781437	0	826	1280_3532.fna
USA300HOU_RS07645|lukF	JYAA01000002	77.03	962	191	26	7	953	2269901	2268955	2e-149	525	1280_3532.fna
USA300HOU_RS07650|lukS	JYAA01000002	75.74	643	138	16	169	803	2272182	2271550	6e-84	307	1280_3532.fna
USA300HOU_RS07645|lukF	JBNM01000001	100	984	0	0	1	984	1492386	1491403	0	1818	1409383_3.fna
USA300HOU_RS07645|lukF	JBNM01000001	82.3	972	166	6	7	975	1888313	1887345	0	837	1409383_3.fna
USA300HOU_RS07645|lukF	JBNM01000003	77.03	962	191	25	7	953	365255	366201	2e-149	525	1409383_3.fna
USA300HOU_RS07650|lukS	JBNM01000001	100	939	0	0	1	939	1493320	1492382	0	1735	1409383_3.fna
USA300HOU_RS07650|lukS	JBNM01000003	75.74	643	138	16	169	803	362975	363607	6e-84	307	1409383_3.fna
USA300HOU_RS07645|lukF	JGHF01000003	100	984	0	0	1	984	117468	116485	0	1818	1418370_3.fna
USA300HOU_RS07645|lukF	JGHF01000006	82.3	972	166	6	7	975	153145	152177	0	837	1418370_3.fna
USA300HOU_RS07645|lukF	JGHF01000001	77.03	962	191	25	7	953	247169	248115	2e-149	525	1418370_3.fna
USA300HOU_RS07650|lukS	JGHF01000003	100	939	0	0	1	939	118402	117464	0	1735	1418370_3.fna
USA300HOU_RS07650|lukS	JGHF01000001	75.74	643	138	16	169	803	244889	245521	6e-84	307	1418370_3.fna
USA300HOU_RS07645|lukF	CSIB01000013	82.3	972	166	6	7	975	37312	38280	0	837	1280_3890.contig
USA300HOU_RS07645|lukF	CSIB01000003	77.03	962	191	26	7	953	79653	78707	2e-149	525	1280_3890.contig
USA300HOU_RS07650|lukS	CSIB01000003	75.74	643	138	16	169	803	81934	81302	6e-84	307	1280_3890.contig
USA300HOU_RS07645|lukF	JYAI01000003	82.1	972	168	6	7	975	342224	341256	0	826	1280_4825.fna
USA300HOU_RS07645|lukF	JYAI01000003	77.03	962	191	25	7	953	931081	932027	2e-149	525	1280_4825.fna
USA300HOU_RS07650|lukS	JYAI01000003	75.74	643	138	16	169	803	928800	929432	6e-84	307	1280_4825.fna
USA300HOU_RS07645|lukF	JABFLC010000003	100	984	0	0	1	984	349698	350681	0	1818	1280_27469.fna
USA300HOU_RS07645|lukF	JABFLC010000006	82.3	972	166	6	7	975	18439	17471	0	837	1280_27469.fna
USA300HOU_RS07645|lukF	JABFLC010000001	77.03	962	191	26	7	953	802016	801070	2e-149	525	1280_27469.fna
USA300HOU_RS07650|lukS	JABFLC010000003	100	939	0	0	1	939	348764	349702	0	1735	1280_27469.fna
USA300HOU_RS07650|lukS	JABFLC010000001	75.74	643	138	16	169	803	804296	803664	6e-84	307	1280_27469.fna
USA300HOU_RS07645|lukF	CSEI01000004	100	984	0	0	1	984	103457	102474	0	1818	1280_3878.contig
USA300HOU_RS07645|lukF	CSEI01000008	82.3	972	166	6	7	975	38547	39515	0	837	1280_3878.contig
USA300HOU_RS07645|lukF	CSEI01000002	77.03	962	191	26	7	953	364869	363923	2e-149	525	1280_3878.contig
USA300HOU_RS07650|lukS	CSEI01000004	100	939	0	0	1	939	104391	103453	0	1735	1280_3878.contig
USA300HOU_RS07650|lukS	CSEI01000002	75.74	643	138	16	169	803	367149	366517	6e-84	307	1280_3878.contig
USA300HOU_RS07645|lukF	JFTN01000004	100	984	0	0	1	984	134092	133109	0	1818	1421876_3.fna
USA300HOU_RS07645|lukF	JFTN01000010	82.3	972	166	6	7	975	39126	38158	0	837	1421876_3.fna
USA300HOU_RS07645|lukF	JFTN01000002	77.03	962	191	25	7	953	333525	334471	2e-149	525	1421876_3.fna
USA300HOU_RS07650|lukS	JFTN01000004	100	939	0	0	1	939	135026	134088	0	1735	1421876_3.fna
USA300HOU_RS07650|lukS	JFTN01000002	75.74	643	138	16	169	803	331245	331877	6e-84	307	1421876_3.fna
USA300HOU_RS07645|lukF	JABFLT010000001	100	984	0	0	1	984	996974	995991	0	1818	1280_27460.fna
USA300HOU_RS07645|lukF	JABFLT010000005	82.3	972	166	6	7	975	18439	17471	0	837	1280_27460.fna
USA300HOU_RS07645|lukF	JABFLT010000002	77.03	962	191	25	7	953	247083	248029	2e-149	525	1280_27460.fna
USA300HOU_RS07650|lukS	JABFLT010000001	100	939	0	0	1	939	997908	996970	0	1735	1280_27460.fna
USA300HOU_RS07650|lukS	JABFLT010000002	75.74	643	138	16	169	803	244803	245435	6e-84	307	1280_27460.fna
USA300HOU_RS07645|lukF	JBFM01000001	100	984	0	0	1	984	663321	662338	0	1818	1409728_3.fna
USA300HOU_RS07645|lukF	JBFM01000001	82.3	972	166	6	7	975	1059267	1058299	0	837	1409728_3.fna
USA300HOU_RS07645|lukF	JBFM01000004	77.03	962	191	25	7	953	66489	67435	2e-149	525	1409728_3.fna
USA300HOU_RS07650|lukS	JBFM01000001	100	939	0	0	1	939	664255	663317	0	1735	1409728_3.fna
USA300HOU_RS07650|lukS	JBFM01000004	75.74	643	138	16	169	803	64209	64841	6e-84	307	1409728_3.fna
USA300HOU_RS07645|lukF	CP029664	100	984	0	0	1	984	1137128	1138111	0	1818	1280_16566.fna
USA300HOU_RS07645|lukF	CP029664	82.3	972	166	6	7	975	741182	742150	0	837	1280_16566.fna
USA300HOU_RS07645|lukF	CP029664	77.03	962	191	26	7	953	151954	151008	2e-149	525	1280_16566.fna
USA300HOU_RS07650|lukS	CP029664	100	939	0	0	1	939	1136194	1137132	0	1735	1280_16566.fna
USA300HOU_RS07650|lukS	CP029664	75.74	643	138	16	169	803	154234	153602	6e-84	307	1280_16566.fna
USA300HOU_RS07645|lukF	BHBJ01000013	82.2	972	167	6	7	975	36884	35916	0	832	46170_598.fna
USA300HOU_RS07645|lukF	BHBJ01000002	77.03	962	191	26	7	953	117178	116232	2e-149	525	46170_598.fna
USA300HOU_RS07650|lukS	BHBJ01000002	75.74	643	138	16	169	803	119459	118827	6e-84	307	46170_598.fna
USA300HOU_RS07645|lukF	JACGYN010000009	82.2	972	167	6	7	975	17952	16984	0	832	1280_28627.fna
USA300HOU_RS07645|lukF	JACGYN010000003	77.03	962	191	25	7	953	227303	228249	2e-149	525	1280_28627.fna
USA300HOU_RS07650|lukS	JACGYN010000003	75.74	643	138	16	169	803	225022	225654	6e-84	307	1280_28627.fna
USA300HOU_RS07645|lukF	JEUU01000001	100	984	0	0	1	984	712444	711461	0	1818	1417112_3.fna
USA300HOU_RS07645|lukF	JEUU01000005	82.3	972	166	6	7	975	46142	45174	0	837	1417112_3.fna
USA300HOU_RS07645|lukF	JEUU01000002	77.03	962	191	25	7	953	365252	366198	2e-149	525	1417112_3.fna
USA300HOU_RS07650|lukS	JEUU01000001	100	939	0	0	1	939	713378	712440	0	1735	1417112_3.fna
USA300HOU_RS07650|lukS	JEUU01000002	75.74	643	138	16	169	803	362972	363604	6e-84	307	1417112_3.fna
USA300HOU_RS07645|lukF	QPKY01000018	82.3	972	166	6	7	975	17153	16185	0	837	1280_26410.fna
USA300HOU_RS07645|lukF	QPKY01000001	77.03	962	191	25	7	953	37714	38660	2e-149	525	1280_26410.fna
USA300HOU_RS07650|lukS	QPKY01000001	75.74	643	138	16	169	803	35433	36065	6e-84	307	1280_26410.fna
USA300HOU_RS07645|lukF	JDPW01000002	100	984	0	0	1	984	6882	5899	0	1818	1411555_3.fna
USA300HOU_RS07645|lukF	JDPW01000013	82.3	972	166	6	7	975	45500	44532	0	837	1411555_3.fna
USA300HOU_RS07645|lukF	JDPW01000011	77.03	962	191	25	7	953	27476	28422	2e-149	525	1411555_3.fna
USA300HOU_RS07650|lukS	JDPW01000002	100	939	0	0	1	939	7816	6878	0	1735	1411555_3.fna
USA300HOU_RS07650|lukS	JDPW01000011	75.74	643	138	16	169	803	25196	25828	7e-84	307	1411555_3.fna
USA300HOU_RS07645|lukF	LGWX01000024	82.3	972	166	6	7	975	37240	38208	0	837	1280_13684.fna
USA300HOU_RS07645|lukF	LGWX01000021	77.03	962	191	25	7	953	112893	113839	2e-149	525	1280_13684.fna
USA300HOU_RS07650|lukS	LGWX01000021	75.74	643	138	16	169	803	110613	111245	6e-84	307	1280_13684.fna
USA300HOU_RS07645|lukF	VNIR01000018	82.3	972	166	6	7	975	1861	893	0	837	1280_21790.fna
USA300HOU_RS07645|lukF	VNIR01000002	77.03	962	191	26	7	953	135404	134458	2e-149	525	1280_21790.fna
USA300HOU_RS07650|lukS	VNIR01000002	75.74	643	138	16	169	803	137684	137052	6e-84	307	1280_21790.fna
USA300HOU_RS07645|lukF	JAAXBA010000008	82.2	972	167	6	7	975	44640	43672	0	832	1280_26576.fna
USA300HOU_RS07645|lukF	JAAXBA010000002	77.03	962	191	26	7	953	618977	618031	2e-149	525	1280_26576.fna
USA300HOU_RS07650|lukS	JAAXBA010000002	75.74	643	138	16	169	803	621258	620626	6e-84	307	1280_26576.fna
USA300HOU_RS07645|lukF	CFPR01000003	100	984	0	0	1	984	242992	243975	0	1818	1280_4769.contig
USA300HOU_RS07645|lukF	CFPR01000010	82.3	972	166	6	7	975	18402	17434	0	837	1280_4769.contig
USA300HOU_RS07645|lukF	CFPR01000002	77.03	962	191	26	7	953	317205	316259	2e-149	525	1280_4769.contig
USA300HOU_RS07650|lukS	CFPR01000003	100	939	0	0	1	939	242058	242996	0	1735	1280_4769.contig
USA300HOU_RS07650|lukS	CFPR01000002	75.74	643	138	16	169	803	319485	318853	6e-84	307	1280_4769.contig
USA300HOU_RS07645|lukF	CHER01000001	100	984	0	0	1	984	242075	243058	0	1818	1280_4785.contig
USA300HOU_RS07645|lukF	CHER01000010	82.3	972	166	6	7	975	18306	17338	0	837	1280_4785.contig
USA300HOU_RS07645|lukF	CHER01000007	77.03	962	191	25	7	953	65678	66624	2e-149	525	1280_4785.contig
USA300HOU_RS07650|lukS	CHER01000001	100	939	0	0	1	939	241141	242079	0	1735	1280_4785.contig
USA300HOU_RS07650|lukS	CHER01000007	75.74	643	138	16	169	803	63398	64030	6e-84	307	1280_4785.contig
USA300HOU_RS07645|lukF	JGIU01000041	82.3	972	166	6	7	975	15428	14460	0	837	1417204_3.fna
USA300HOU_RS07645|lukF	JGIU01000011	77.03	962	191	25	7	953	36825	37771	2e-149	525	1417204_3.fna
USA300HOU_RS07650|lukS	JGIU01000011	75.74	643	138	16	169	803	34545	35177	6e-84	307	1417204_3.fna
USA300HOU_RS07645|lukF	CSJC01000002	100	984	0	0	1	984	103455	102472	0	1818	1280_3964.contig
USA300HOU_RS07645|lukF	CSJC01000011	82.3	972	166	6	7	975	37303	38271	0	837	1280_3964.contig
USA300HOU_RS07645|lukF	CSJC01000007	77.03	962	191	26	7	953	79299	78353	2e-149	525	1280_3964.contig
USA300HOU_RS07650|lukS	CSJC01000002	100	939	0	0	1	939	104389	103451	0	1735	1280_3964.contig
USA300HOU_RS07650|lukS	CSJC01000007	75.74	643	138	16	169	803	81579	80947	6e-84	307	1280_3964.contig
USA300HOU_RS07645|lukF	CFOI01000002	100	984	0	0	1	984	103475	102492	0	1818	1280_4724.contig
USA300HOU_RS07645|lukF	CFOI01000012	82.3	972	166	6	7	975	37308	38276	0	837	1280_4724.contig
USA300HOU_RS07645|lukF	CFOI01000007	77.03	962	191	25	7	953	65739	66685	2e-149	525	1280_4724.contig
USA300HOU_RS07650|lukS	CFOI01000002	100	939	0	0	1	939	104409	103471	0	1735	1280_4724.contig
USA300HOU_RS07650|lukS	CFOI01000007	75.74	643	138	16	169	803	63459	64091	6e-84	307	1280_4724.contig
USA300HOU_RS07645|lukF	PZYP01000020	82.2	972	167	6	7	975	35505	36473	0	832	1280_16757.fna
USA300HOU_RS07645|lukF	PZYP01000003	77.03	962	191	25	7	953	112949	113895	2e-149	525	1280_16757.fna
USA300HOU_RS07650|lukS	PZYP01000003	75.74	643	138	16	169	803	110668	111300	6e-84	307	1280_16757.fna
USA300HOU_RS07645|lukF	CIAF01000012	82.41	972	165	6	7	975	18390	17422	0	843	1280_4685.contig
USA300HOU_RS07645|lukF	CIAF01000002	77.03	962	191	26	7	953	79142	78196	2e-149	525	1280_4685.contig
USA300HOU_RS07650|lukS	CIAF01000002	75.58	643	139	16	169	803	81423	80791	3e-82	302	1280_4685.contig
USA300HOU_RS07645|lukF	JBLX01000007	100	984	0	0	1	984	134020	133037	0	1818	1409427_3.fna
USA300HOU_RS07645|lukF	JBLX01000008	82.3	972	166	6	7	975	45737	44769	0	837	1409427_3.fna
USA300HOU_RS07645|lukF	JBLX01000005	77.03	962	191	25	7	953	365255	366201	2e-149	525	1409427_3.fna
USA300HOU_RS07650|lukS	JBLX01000007	100	939	0	0	1	939	134954	134016	0	1735	1409427_3.fna
USA300HOU_RS07650|lukS	JBLX01000005	75.74	643	138	16	169	803	362975	363607	6e-84	307	1409427_3.fna
USA300HOU_RS07645|lukF	OFUP01000042	100	984	0	0	1	984	53388	52405	0	1818	1280_16311.fna
USA300HOU_RS07645|lukF	OFUP01000030	82.3	972	166	6	7	975	1847	879	0	837	1280_16311.fna
USA300HOU_RS07645|lukF	OFUP01000013	77.03	962	191	26	7	953	321086	320140	2e-149	525	1280_16311.fna
USA300HOU_RS07650|lukS	OFUP01000042	100	939	0	0	1	939	54322	53384	0	1735	1280_16311.fna
USA300HOU_RS07650|lukS	OFUP01000013	75.74	643	138	16	169	803	323366	322734	6e-84	307	1280_16311.fna
USA300HOU_RS07645|lukF	CFJO01000003	100	984	0	0	1	984	103456	102473	0	1818	1280_4699.contig
USA300HOU_RS07645|lukF	CFJO01000009	82.3	972	166	6	7	975	37309	38277	0	837	1280_4699.contig
USA300HOU_RS07645|lukF	CFJO01000002	77.03	962	191	26	7	953	364165	363219	2e-149	525	1280_4699.contig
USA300HOU_RS07650|lukS	CFJO01000003	100	939	0	0	1	939	104390	103452	0	1735	1280_4699.contig
USA300HOU_RS07650|lukS	CFJO01000002	75.74	643	138	16	169	803	366445	365813	6e-84	307	1280_4699.contig
USA300HOU_RS07645|lukF	JEUS01000003	100	984	0	0	1	984	91304	90321	0	1818	1417096_3.fna
USA300HOU_RS07645|lukF	JEUS01000009	82.3	972	166	6	7	975	45299	44331	0	837	1417096_3.fna
USA300HOU_RS07645|lukF	JEUS01000002	77.03	962	191	25	7	953	365254	366200	2e-149	525	1417096_3.fna
USA300HOU_RS07650|lukS	JEUS01000003	100	939	0	0	1	939	92238	91300	0	1735	1417096_3.fna
USA300HOU_RS07650|lukS	JEUS01000002	75.74	643	138	16	169	803	362974	363606	7e-84	307	1417096_3.fna
USA300HOU_RS07645|lukF	NMWL01000004	100	984	0	0	1	984	242085	243068	0	1818	46170_347.fna
USA300HOU_RS07645|lukF	NMWL01000009	82.3	972	166	6	7	975	37348	38316	0	837	46170_347.fna
USA300HOU_RS07645|lukF	NMWL01000002	77.03	962	191	26	7	953	380523	379577	2e-149	525	46170_347.fna
USA300HOU_RS07650|lukS	NMWL01000004	100	939	0	0	1	939	241151	242089	0	1735	46170_347.fna
USA300HOU_RS07650|lukS	NMWL01000002	75.74	643	138	16	169	803	382803	382171	6e-84	307	46170_347.fna
USA300HOU_RS07645|lukF	JEBA01000001	100	984	0	0	1	984	605898	604915	0	1818	1412766_3.fna
USA300HOU_RS07645|lukF	JEBA01000001	82.3	972	166	6	7	975	1001841	1000873	0	837	1412766_3.fna
USA300HOU_RS07645|lukF	JEBA01000003	77.03	962	191	25	7	953	155603	156549	2e-149	525	1412766_3.fna
USA300HOU_RS07650|lukS	JEBA01000001	100	939	0	0	1	939	606832	605894	0	1735	1412766_3.fna
USA300HOU_RS07650|lukS	JEBA01000003	75.74	643	138	16	169	803	153323	153955	6e-84	307	1412766_3.fna
USA300HOU_RS07645|lukF	1280.8750.con.0015	82.1	972	168	6	7	975	37277	38245	0	826	1280_8750.fna
USA300HOU_RS07645|lukF	1280.8750.con.0008	77.03	962	191	25	7	953	65721	66667	2e-149	525	1280_8750.fna
USA300HOU_RS07650|lukS	1280.8750.con.0008	75.74	643	138	16	169	803	63440	64072	6e-84	307	1280_8750.fna
USA300HOU_RS07645|lukF	CGEG01000002	100	984	0	0	1	984	101962	100979	0	1818	1280_4680.contig
USA300HOU_RS07645|lukF	CGEG01000011	82.3	972	166	6	7	975	37308	38276	0	837	1280_4680.contig
USA300HOU_RS07645|lukF	CGEG01000003	77.03	962	191	26	7	953	79315	78369	2e-149	525	1280_4680.contig
USA300HOU_RS07650|lukS	CGEG01000002	100	939	0	0	1	939	102896	101958	0	1735	1280_4680.contig
USA300HOU_RS07650|lukS	CGEG01000003	75.74	643	138	16	169	803	81595	80963	6e-84	307	1280_4680.contig
USA300HOU_RS07645|lukF	JABFLB010000003	100	984	0	0	1	984	103500	102517	0	1818	1280_27470.fna
USA300HOU_RS07645|lukF	JABFLB010000006	82.3	972	166	6	7	975	37348	38316	0	837	1280_27470.fna
USA300HOU_RS07645|lukF	JABFLB010000001	77.03	962	191	25	7	953	247082	248028	2e-149	525	1280_27470.fna
USA300HOU_RS07650|lukS	JABFLB010000003	100	939	0	0	1	939	104434	103496	0	1735	1280_27470.fna
USA300HOU_RS07650|lukS	JABFLB010000001	75.74	643	138	16	169	803	244802	245434	6e-84	307	1280_27470.fna
USA300HOU_RS07645|lukF	JDMJ01000002	100	984	0	0	1	984	131202	130219	0	1818	1410849_3.fna
USA300HOU_RS07645|lukF	JDMJ01000011	82.3	972	166	6	7	975	45299	44331	0	837	1410849_3.fna
USA300HOU_RS07645|lukF	JDMJ01000007	77.03	962	191	25	7	953	66489	67435	2e-149	525	1410849_3.fna
USA300HOU_RS07650|lukS	JDMJ01000002	100	939	0	0	1	939	132136	131198	0	1735	1410849_3.fna
USA300HOU_RS07650|lukS	JDMJ01000007	75.74	643	138	16	169	803	64209	64841	6e-84	307	1410849_3.fna
USA300HOU_RS07645|lukF	BEBN01000014	82.3	972	166	6	7	975	37350	38318	0	837	1280_17905.fna
USA300HOU_RS07645|lukF	BEBN01000001	77.03	962	191	25	7	953	47537	48483	2e-149	525	1280_17905.fna
USA300HOU_RS07650|lukS	BEBN01000001	75.74	643	138	16	169	803	45256	45888	6e-84	307	1280_17905.fna
USA300HOU_RS07645|lukF	1280.4939.con.0023	100	984	0	0	1	984	90387	89404	0	1818	1280_4939.fna
USA300HOU_RS07645|lukF	1280.4939.con.0029	82.3	972	166	6	7	975	37379	38347	0	837	1280_4939.fna
USA300HOU_RS07645|lukF	1280.4939.con.0049	77.03	962	191	26	7	953	79673	78727	2e-149	525	1280_4939.fna
USA300HOU_RS07650|lukS	1280.4939.con.0023	100	939	0	0	1	939	91321	90383	0	1735	1280_4939.fna
USA300HOU_RS07650|lukS	1280.4939.con.0049	75.74	643	138	16	169	803	81953	81321	6e-84	307	1280_4939.fna
USA300HOU_RS07645|lukF	CP053639	82.3	972	166	6	7	975	2652560	2651592	0	837	1280_27619.fna
USA300HOU_RS07645|lukF	CP053639	77.03	962	191	25	7	953	402374	403320	2e-149	525	1280_27619.fna
USA300HOU_RS07650|lukS	CP053639	75.74	643	138	16	169	803	400093	400725	6e-84	307	1280_27619.fna
USA300HOU_RS07645|lukF	JDPY01000001	100	984	0	0	1	984	669291	668308	0	1818	1411557_3.fna
USA300HOU_RS07645|lukF	JDPY01000003	82.3	972	166	6	7	975	226324	225356	0	837	1411557_3.fna
USA300HOU_RS07645|lukF	JDPY01000008	77.03	962	191	25	7	953	66156	67102	2e-149	525	1411557_3.fna
USA300HOU_RS07650|lukS	JDPY01000001	100	939	0	0	1	939	670225	669287	0	1735	1411557_3.fna
USA300HOU_RS07650|lukS	JDPY01000008	75.74	643	138	16	169	803	63876	64508	6e-84	307	1411557_3.fna
USA300HOU_RS07645|lukF	CYOD01000002	100	984	0	0	1	984	349721	350704	0	1818	1280_4499.contig
USA300HOU_RS07645|lukF	CYOD01000009	82.3	972	166	6	7	975	37305	38273	0	837	1280_4499.contig
USA300HOU_RS07645|lukF	CYOD01000004	77.03	962	191	26	7	953	79193	78247	2e-149	525	1280_4499.contig
USA300HOU_RS07650|lukS	CYOD01000002	100	939	0	0	1	939	348787	349725	0	1735	1280_4499.contig
USA300HOU_RS07650|lukS	CYOD01000004	75.74	643	138	16	169	803	81473	80841	6e-84	307	1280_4499.contig
USA300HOU_RS07645|lukF	CSGX01000002	100	984	0	0	1	984	103447	102464	0	1818	1280_3809.contig
USA300HOU_RS07645|lukF	CSGX01000012	82.3	972	166	6	7	975	37303	38271	0	837	1280_3809.contig
USA300HOU_RS07645|lukF	CSGX01000007	77.03	962	191	26	7	953	79193	78247	2e-149	525	1280_3809.contig
USA300HOU_RS07650|lukS	CSGX01000002	100	939	0	0	1	939	104381	103443	0	1735	1280_3809.contig
USA300HOU_RS07650|lukS	CSGX01000007	75.74	643	138	16	169	803	81473	80841	6e-84	307	1280_3809.contig
USA300HOU_RS07645|lukF	JACSIM010000001	82.3	972	166	6	7	975	1449811	1450779	0	837	1280_30767.fna
USA300HOU_RS07645|lukF	JACSIM010000001	77.03	962	191	26	7	953	861657	860711	2e-149	525	1280_30767.fna
USA300HOU_RS07650|lukS	JACSIM010000001	75.74	643	138	16	169	803	863938	863306	7e-84	307	1280_30767.fna
USA300HOU_RS07645|lukF	NDPU01000005	82.15	975	162	10	7	975	14310	13342	0	826	1280_12417.fna
USA300HOU_RS07645|lukF	NDPU01000031	77.03	962	191	25	7	953	187570	188516	2e-149	525	1280_12417.fna
USA300HOU_RS07650|lukS	NDPU01000031	75.74	643	138	16	169	803	185289	185921	6e-84	307	1280_12417.fna
USA300HOU_RS07645|lukF	1280.9960.con.0023	82.3	972	166	6	7	975	15271	14303	0	837	1280_9960.fna
USA300HOU_RS07645|lukF	1280.9960.con.0007	77.03	962	191	25	7	953	66041	66987	2e-149	525	1280_9960.fna
USA300HOU_RS07650|lukS	1280.9960.con.0007	75.58	643	139	16	169	803	63760	64392	3e-82	302	1280_9960.fna
USA300HOU_RS07645|lukF	CSFB01000003	100	984	0	0	1	984	242893	243876	0	1818	1280_3804.contig
USA300HOU_RS07645|lukF	CSFB01000010	82.3	972	166	6	7	975	37297	38265	0	837	1280_3804.contig
USA300HOU_RS07645|lukF	CSFB01000002	77.03	962	191	26	7	953	363264	362318	2e-149	525	1280_3804.contig
USA300HOU_RS07650|lukS	CSFB01000003	100	939	0	0	1	939	241959	242897	0	1735	1280_3804.contig
USA300HOU_RS07650|lukS	CSFB01000002	75.74	643	138	16	169	803	365544	364912	6e-84	307	1280_3804.contig
USA300HOU_RS07645|lukF	OGAH01000026	100	984	0	0	1	984	350402	351385	0	1818	1280_16156.fna
USA300HOU_RS07645|lukF	OGAH01000049	82.3	972	166	6	7	975	37303	38271	0	837	1280_16156.fna
USA300HOU_RS07645|lukF	OGAH01000029	77.03	962	191	26	7	953	79135	78189	2e-149	525	1280_16156.fna
USA300HOU_RS07650|lukS	OGAH01000026	100	939	0	0	1	939	349468	350406	0	1735	1280_16156.fna
USA300HOU_RS07650|lukS	OGAH01000029	75.74	643	138	16	169	803	81415	80783	6e-84	307	1280_16156.fna
USA300HOU_RS07645|lukF	CYKU01000003	100	984	0	0	1	984	103475	102492	0	1818	1280_4480.contig
USA300HOU_RS07645|lukF	CYKU01000006	82.3	972	166	6	7	975	39935	38967	0	837	1280_4480.contig
USA300HOU_RS07645|lukF	CYKU01000002	77.03	962	191	26	7	953	433374	432428	2e-149	525	1280_4480.contig
USA300HOU_RS07650|lukS	CYKU01000003	100	939	0	0	1	939	104409	103471	0	1735	1280_4480.contig
USA300HOU_RS07650|lukS	CYKU01000002	75.74	643	138	16	169	803	435654	435022	6e-84	307	1280_4480.contig
USA300HOU_RS07645|lukF	BHBA01000005	82.2	972	167	6	7	975	44659	43691	0	832	46170_590.fna
USA300HOU_RS07645|lukF	BHBA01000002	77.03	962	191	25	7	953	247192	248138	2e-149	525	46170_590.fna
USA300HOU_RS07650|lukS	BHBA01000002	75.74	643	138	16	169	803	244911	245543	6e-84	307	46170_590.fna
USA300HOU_RS07645|lukF	CYMN01000003	100	984	0	0	1	984	242798	243781	0	1818	1280_4547.contig
USA300HOU_RS07645|lukF	CYMN01000008	82.3	972	166	6	7	975	18394	17426	0	837	1280_4547.contig
USA300HOU_RS07645|lukF	CYMN01000002	77.03	962	191	25	7	953	247008	247954	2e-149	525	1280_4547.contig
USA300HOU_RS07650|lukS	CYMN01000003	100	939	0	0	1	939	241864	242802	0	1735	1280_4547.contig
USA300HOU_RS07650|lukS	CYMN01000002	75.74	643	138	16	169	803	244728	245360	6e-84	307	1280_4547.contig
USA300HOU_RS07645|lukF	JGFG01000007	100	984	0	0	1	984	91203	90220	0	1818	1417185_3.fna
USA300HOU_RS07645|lukF	JGFG01000003	82.3	972	166	6	7	975	355572	354604	0	837	1417185_3.fna
USA300HOU_RS07645|lukF	JGFG01000001	77.03	962	191	25	7	953	313279	314225	2e-149	525	1417185_3.fna
USA300HOU_RS07650|lukS	JGFG01000007	100	939	0	0	1	939	92137	91199	0	1735	1417185_3.fna
USA300HOU_RS07650|lukS	JGFG01000001	75.74	643	138	16	169	803	310999	311631	6e-84	307	1417185_3.fna
USA300HOU_RS07645|lukF	CSJV01000002	100	984	0	0	1	984	243011	243994	0	1818	1280_3932.contig
USA300HOU_RS07645|lukF	CSJV01000011	82.3	972	166	6	7	975	37318	38286	0	837	1280_3932.contig
USA300HOU_RS07645|lukF	CSJV01000007	77.03	962	191	25	7	953	66254	67200	2e-149	525	1280_3932.contig
USA300HOU_RS07650|lukS	CSJV01000002	100	939	0	0	1	939	242077	243015	0	1735	1280_3932.contig
USA300HOU_RS07650|lukS	CSJV01000007	75.74	643	138	16	169	803	63974	64606	6e-84	307	1280_3932.contig
USA300HOU_RS07645|lukF	AHVQ01000010	82.3	972	166	6	7	975	17992	17024	0	837	931442_3.fna
USA300HOU_RS07645|lukF	AHVQ01000001	77	961	193	23	7	953	249403	250349	2e-149	525	931442_3.fna
USA300HOU_RS07650|lukS	AHVQ01000001	75.74	643	138	16	169	803	247122	247754	6e-84	307	931442_3.fna
USA300HOU_RS07645|lukF	JBKM01000004	100	984	0	0	1	984	180437	179454	0	1818	1409580_3.fna
USA300HOU_RS07645|lukF	JBKM01000005	82.3	972	166	6	7	975	45791	44823	0	837	1409580_3.fna
USA300HOU_RS07645|lukF	JBKM01000003	77.03	962	191	25	7	953	226319	227265	2e-149	525	1409580_3.fna
USA300HOU_RS07650|lukS	JBKM01000004	100	939	0	0	1	939	181371	180433	0	1735	1409580_3.fna
USA300HOU_RS07650|lukS	JBKM01000003	75.74	643	138	16	169	803	224039	224671	7e-84	307	1409580_3.fna
USA300HOU_RS07645|lukF	WWFP01000011	82.1	972	168	6	7	975	37299	38267	0	826	561307_22.fna
USA300HOU_RS07645|lukF	WWFP01000004	77.03	962	191	25	7	953	225604	226550	2e-149	525	561307_22.fna
USA300HOU_RS07650|lukS	WWFP01000004	75.74	643	138	16	169	803	223323	223955	6e-84	307	561307_22.fna
USA300HOU_RS07645|lukF	JACGYM010000009	82.2	972	167	6	7	975	16208	15240	0	832	1280_28628.fna
USA300HOU_RS07645|lukF	JACGYM010000002	77.03	962	191	25	7	953	225587	226533	2e-149	525	1280_28628.fna
USA300HOU_RS07650|lukS	JACGYM010000002	75.74	643	138	16	169	803	223306	223938	6e-84	307	1280_28628.fna
USA300HOU_RS07645|lukF	NDKJ01000055	82.3	972	166	6	7	975	18401	17433	0	837	1280_12290.fna
USA300HOU_RS07645|lukF	NDKJ01000063	77.03	962	191	25	7	953	66253	67199	2e-149	525	1280_12290.fna
USA300HOU_RS07650|lukS	NDKJ01000063	75.74	643	138	16	169	803	63973	64605	6e-84	307	1280_12290.fna
USA300HOU_RS07645|lukF	BEBU01000001	82.2	972	167	6	7	975	1337532	1336564	0	832	1280_17912.fna
USA300HOU_RS07645|lukF	BEBU01000002	77.03	962	191	25	7	953	247091	248037	2e-149	525	1280_17912.fna
USA300HOU_RS07650|lukS	BEBU01000002	75.74	643	138	16	169	803	244810	245442	6e-84	307	1280_17912.fna
USA300HOU_RS07645|lukF	CYKX01000003	100	984	0	0	1	984	242978	243961	0	1818	1280_4420.contig
USA300HOU_RS07645|lukF	CYKX01000006	82.3	972	166	6	7	975	18401	17433	0	837	1280_4420.contig
USA300HOU_RS07645|lukF	CYKX01000001	77.03	962	191	26	7	953	811968	811022	2e-149	525	1280_4420.contig
USA300HOU_RS07650|lukS	CYKX01000003	100	939	0	0	1	939	242044	242982	0	1735	1280_4420.contig
USA300HOU_RS07650|lukS	CYKX01000001	75.74	643	138	16	169	803	814248	813616	6e-84	307	1280_4420.contig
USA300HOU_RS07645|lukF	1280.7312.con.0008	100	984	0	0	1	984	40147	41130	0	1818	1280_7312.fna
USA300HOU_RS07645|lukF	1280.7312.con.0024	82.3	972	166	6	7	975	15271	14303	0	837	1280_7312.fna
USA300HOU_RS07645|lukF	1280.7312.con.0007	77.03	962	191	25	7	953	66054	67000	2e-149	525	1280_7312.fna
USA300HOU_RS07650|lukS	1280.7312.con.0008	100	939	0	0	1	939	39213	40151	0	1735	1280_7312.fna
USA300HOU_RS07650|lukS	1280.7312.con.0007	75.74	643	138	16	169	803	63774	64406	7e-84	307	1280_7312.fna
USA300HOU_RS07645|lukF	JDOB01000007	100	984	0	0	1	984	118259	117276	0	1818	1410912_3.fna
USA300HOU_RS07645|lukF	JDOB01000013	82.3	972	166	6	7	975	19491	18523	0	837	1410912_3.fna
USA300HOU_RS07645|lukF	JDOB01000002	77.03	962	191	25	7	953	247631	248577	2e-149	525	1410912_3.fna
USA300HOU_RS07650|lukS	JDOB01000007	100	939	0	0	1	939	119193	118255	0	1735	1410912_3.fna
USA300HOU_RS07650|lukS	JDOB01000002	75.74	643	138	16	169	803	245351	245983	6e-84	307	1410912_3.fna
USA300HOU_RS07645|lukF	JDJK01000002	100	984	0	0	1	984	812073	811090	0	1818	1410763_3.fna
USA300HOU_RS07645|lukF	JDJK01000002	82.3	972	166	6	7	975	1208018	1207050	0	837	1410763_3.fna
USA300HOU_RS07645|lukF	JDJK01000003	77.03	962	191	25	7	953	66576	67522	2e-149	525	1410763_3.fna
USA300HOU_RS07650|lukS	JDJK01000002	100	939	0	0	1	939	813007	812069	0	1735	1410763_3.fna
USA300HOU_RS07650|lukS	JDJK01000003	75.74	643	138	16	169	803	64296	64928	6e-84	307	1410763_3.fna
USA300HOU_RS07645|lukF	CSFA01000007	100	984	0	0	1	984	50219	51202	0	1818	1280_4053.contig
USA300HOU_RS07645|lukF	CSFA01000025	82.3	972	166	6	7	975	17987	17019	0	837	1280_4053.contig
USA300HOU_RS07645|lukF	CSFA01000010	77.03	962	191	25	7	953	65678	66624	2e-149	525	1280_4053.contig
USA300HOU_RS07650|lukS	CSFA01000007	100	939	0	0	1	939	49285	50223	0	1735	1280_4053.contig
USA300HOU_RS07650|lukS	CSFA01000010	75.74	643	138	16	169	803	63398	64030	6e-84	307	1280_4053.contig
USA300HOU_RS07645|lukF	CYPO01000003	100	984	0	0	1	984	242881	243864	0	1818	1280_4467.contig
USA300HOU_RS07645|lukF	CYPO01000010	82.3	972	166	6	7	975	37354	38322	0	837	1280_4467.contig
USA300HOU_RS07645|lukF	CYPO01000004	77.03	962	191	26	7	953	79687	78741	2e-149	525	1280_4467.contig
USA300HOU_RS07650|lukS	CYPO01000003	100	939	0	0	1	939	241947	242885	0	1735	1280_4467.contig
USA300HOU_RS07650|lukS	CYPO01000004	75.74	643	138	16	169	803	81967	81335	6e-84	307	1280_4467.contig
USA300HOU_RS07645|lukF	MUEE01000016	82.1	972	168	6	7	975	38920	37952	0	826	1280_11671.fna
USA300HOU_RS07645|lukF	MUEE01000035	77.03	962	191	26	7	953	35880	34934	2e-149	525	1280_11671.fna
USA300HOU_RS07650|lukS	MUEE01000035	75.74	643	138	16	169	803	38161	37529	6e-84	307	1280_11671.fna
USA300HOU_RS07645|lukF	CP009423	100	984	0	0	1	984	1549628	1548645	0	1818	46170_305.fna
USA300HOU_RS07645|lukF	CP009423	82.2	972	167	6	7	975	1988736	1987768	0	832	46170_305.fna
USA300HOU_RS07645|lukF	CP009423	77.03	962	191	25	7	953	2576589	2577535	2e-149	525	46170_305.fna
USA300HOU_RS07650|lukS	CP009423	100	939	0	0	1	939	1550562	1549624	0	1735	46170_305.fna
USA300HOU_RS07650|lukS	CP009423	75.74	643	138	16	169	803	2574309	2574941	7e-84	307	46170_305.fna
USA300HOU_RS07645|lukF	JHPT01000024	82.1	972	168	6	7	975	37222	38190	0	826	904740_3.fna
USA300HOU_RS07645|lukF	JHPT01000006	77.03	962	191	26	7	953	79055	78109	2e-149	525	904740_3.fna
USA300HOU_RS07650|lukS	JHPT01000006	75.74	643	138	16	169	803	81336	80704	6e-84	307	904740_3.fna
USA300HOU_RS07645|lukF	JACOBY010000003	100	984	0	0	1	984	242083	243066	0	1818	1280_30827.fna
USA300HOU_RS07645|lukF	JACOBY010000007	82.3	972	166	6	7	975	37348	38316	0	837	1280_30827.fna
USA300HOU_RS07645|lukF	JACOBY010000001	77.03	962	191	26	7	953	785748	784802	2e-149	525	1280_30827.fna
USA300HOU_RS07650|lukS	JACOBY010000003	100	939	0	0	1	939	241149	242087	0	1735	1280_30827.fna
USA300HOU_RS07650|lukS	JACOBY010000001	75.74	643	138	16	169	803	788028	787396	6e-84	307	1280_30827.fna
USA300HOU_RS07645|lukF	CSCU01000002	100	984	0	0	1	984	65836	64853	0	1818	1280_3958.contig
USA300HOU_RS07645|lukF	CSCU01000024	82.3	972	166	6	7	975	16562	15594	0	837	1280_3958.contig
USA300HOU_RS07645|lukF	CSCU01000009	77.03	962	191	25	7	953	65488	66434	2e-149	525	1280_3958.contig
USA300HOU_RS07650|lukS	CSCU01000002	100	939	0	0	1	939	66770	65832	0	1735	1280_3958.contig
USA300HOU_RS07650|lukS	CSCU01000009	75.74	643	138	16	169	803	63208	63840	6e-84	307	1280_3958.contig
USA300HOU_RS07645|lukF	JECE01000005	82.3	972	166	6	7	975	365131	364163	0	837	1412711_3.fna
USA300HOU_RS07645|lukF	JECE01000003	77.03	962	191	25	7	953	365243	366189	2e-149	525	1412711_3.fna
USA300HOU_RS07650|lukS	JECE01000003	75.74	643	138	16	169	803	362963	363595	7e-84	307	1412711_3.fna
USA300HOU_RS07645|lukF	JEQA01000001	100	984	0	0	1	984	309902	308919	0	1818	1417044_3.fna
USA300HOU_RS07645|lukF	JEQA01000009	82.3	972	166	6	7	975	63686	62718	0	837	1417044_3.fna
USA300HOU_RS07645|lukF	JEQA01000004	77.03	962	191	25	7	953	365255	366201	2e-149	525	1417044_3.fna
USA300HOU_RS07650|lukS	JEQA01000001	100	939	0	0	1	939	310836	309898	0	1735	1417044_3.fna
USA300HOU_RS07650|lukS	JEQA01000004	75.74	643	138	16	169	803	362975	363607	6e-84	307	1417044_3.fna
USA300HOU_RS07645|lukF	CSIX01000002	100	984	0	0	1	984	243010	243993	0	1818	1280_3948.contig
USA300HOU_RS07645|lukF	CSIX01000010	82.3	972	166	6	7	975	37312	38280	0	837	1280_3948.contig
USA300HOU_RS07645|lukF	CSIX01000007	77.03	962	191	26	7	953	79145	78199	2e-149	525	1280_3948.contig
USA300HOU_RS07650|lukS	CSIX01000002	100	939	0	0	1	939	242076	243014	0	1735	1280_3948.contig
USA300HOU_RS07650|lukS	CSIX01000007	75.74	643	138	16	169	803	81425	80793	6e-84	307	1280_3948.contig
USA300HOU_RS07645|lukF	MUEG01000049	82.1	972	168	6	7	975	1402	434	0	826	1280_11674.fna
USA300HOU_RS07645|lukF	MUEG01000020	77.03	962	191	25	7	953	66192	67138	2e-149	525	1280_11674.fna
USA300HOU_RS07650|lukS	MUEG01000020	75.74	643	138	16	169	803	63911	64543	6e-84	307	1280_11674.fna
USA300HOU_RS07645|lukF	JBHX01000001	100	984	0	0	1	984	669788	668805	0	1818	1409654_3.fna
USA300HOU_RS07645|lukF	JBHX01000004	82.3	972	166	6	7	975	196872	195904	0	837	1409654_3.fna
USA300HOU_RS07645|lukF	JBHX01000002	77.03	962	191	25	7	953	365240	366186	2e-149	525	1409654_3.fna
USA300HOU_RS07650|lukS	JBHX01000001	100	939	0	0	1	939	670722	669784	0	1735	1409654_3.fna
USA300HOU_RS07650|lukS	JBHX01000002	75.74	643	138	16	169	803	362960	363592	6e-84	307	1409654_3.fna
USA300HOU_RS07645|lukF	AIVI01000001	100	984	0	0	1	984	1000160	999177	0	1818	1156996_3.fna
USA300HOU_RS07645|lukF	AIVI01000002	82.3	972	166	6	7	975	1898	930	0	837	1156996_3.fna
USA300HOU_RS07645|lukF	AIVI01000003	77.03	962	191	25	7	953	248031	248977	2e-149	525	1156996_3.fna
USA300HOU_RS07650|lukS	AIVI01000001	100	939	0	0	1	939	1001094	1000156	0	1735	1156996_3.fna
USA300HOU_RS07650|lukS	AIVI01000003	75.74	643	138	16	169	803	245751	246383	6e-84	307	1156996_3.fna
USA300HOU_RS07645|lukF	MUDL01000016	82.1	972	168	6	7	975	4616	5584	0	826	1280_11666.fna
USA300HOU_RS07645|lukF	MUDL01000014	77.03	962	191	26	7	953	35786	34840	2e-149	525	1280_11666.fna
USA300HOU_RS07650|lukS	MUDL01000068	97.22	36	1	0	880	915	617	582	5e-10	62.1	1280_11666.fna
USA300HOU_RS07645|lukF	CP047820	82.3	972	166	6	7	975	153834	154802	0	837	1280_24281.fna
USA300HOU_RS07645|lukF	CP047820	77.03	962	191	26	7	953	2328444	2327498	2e-149	525	1280_24281.fna
USA300HOU_RS07650|lukS	CP047820	75.74	643	138	16	169	803	2330725	2330093	6e-84	307	1280_24281.fna
USA300HOU_RS07645|lukF	JDGG01000001	100	984	0	0	1	984	809112	808129	0	1818	1410749_3.fna
USA300HOU_RS07645|lukF	JDGG01000001	82.3	972	166	6	7	975	1205058	1204090	0	837	1410749_3.fna
USA300HOU_RS07645|lukF	JDGG01000002	77.03	962	191	25	7	953	365256	366202	2e-149	525	1410749_3.fna
USA300HOU_RS07650|lukS	JDGG01000001	100	939	0	0	1	939	810046	809108	0	1735	1410749_3.fna
USA300HOU_RS07650|lukS	JDGG01000002	75.74	643	138	16	169	803	362976	363608	6e-84	307	1410749_3.fna
USA300HOU_RS07645|lukF	LGXA01000007	100	984	0	0	1	984	104258	105241	0	1818	1280_13671.fna
USA300HOU_RS07645|lukF	LGXA01000001	82.3	972	166	6	7	975	18331	17363	0	837	1280_13671.fna
USA300HOU_RS07645|lukF	LGXA01000005	77.03	962	191	26	7	953	43726	42780	2e-149	525	1280_13671.fna
USA300HOU_RS07650|lukS	LGXA01000007	100	939	0	0	1	939	103324	104262	0	1735	1280_13671.fna
USA300HOU_RS07650|lukS	LGXA01000005	75.74	643	138	16	169	803	46006	45374	6e-84	307	1280_13671.fna
USA300HOU_RS07645|lukF	BDYT01000007	82.3	972	166	6	7	975	18183	17215	0	837	1280_17834.fna
USA300HOU_RS07645|lukF	BDYT01000001	77.03	962	191	26	7	953	729990	729044	2e-149	525	1280_17834.fna
USA300HOU_RS07650|lukS	BDYT01000001	75.74	643	138	16	169	803	732271	731639	6e-84	307	1280_17834.fna
USA300HOU_RS07645|lukF	JABFKF010000004	100	984	0	0	1	984	103500	102517	0	1818	1280_27492.fna
USA300HOU_RS07645|lukF	JABFKF010000007	82.2	972	167	6	7	975	37348	38316	0	832	1280_27492.fna
USA300HOU_RS07645|lukF	JABFKF010000002	77.03	962	191	26	7	953	79180	78234	2e-149	525	1280_27492.fna
USA300HOU_RS07650|lukS	JABFKF010000004	100	939	0	0	1	939	104434	103496	0	1735	1280_27492.fna
USA300HOU_RS07650|lukS	JABFKF010000002	75.74	643	138	16	169	803	81460	80828	7e-84	307	1280_27492.fna
USA300HOU_RS07645|lukF	1280.7295.con.0024	82.3	972	166	6	7	975	5293	6261	0	837	1280_7295.fna
USA300HOU_RS07645|lukF	1280.7295.con.0005	77.03	962	191	25	7	953	112642	113588	2e-149	525	1280_7295.fna
USA300HOU_RS07650|lukS	1280.7295.con.0005	75.74	643	138	16	169	803	110361	110993	6e-84	307	1280_7295.fna
USA300HOU_RS07645|lukF	BEAH01000001	77.03	962	191	25	7	953	1134	2080	2e-149	525	1280_17873.fna
USA300HOU_RS07650|lukS	BEAH01000008	75.74	643	138	16	169	803	140835	141467	6e-84	307	1280_17873.fna
USA300HOU_RS07645|lukF	JDPB01000005	100	984	0	0	1	984	686566	685583	0	1818	1411533_3.fna
USA300HOU_RS07645|lukF	JDPB01000005	82.3	972	166	6	7	975	1082511	1081543	0	837	1411533_3.fna
USA300HOU_RS07645|lukF	JDPB01000005	76.92	962	192	25	7	953	1670122	1671068	8e-148	520	1411533_3.fna
USA300HOU_RS07650|lukS	JDPB01000005	100	939	0	0	1	939	687500	686562	0	1735	1411533_3.fna
USA300HOU_RS07650|lukS	JDPB01000005	75.74	643	138	16	169	803	1667842	1668474	6e-84	307	1411533_3.fna
USA300HOU_RS07645|lukF	LT671859	82.3	972	166	6	7	975	1876007	1875039	0	837	46170_290.fna
USA300HOU_RS07645|lukF	LT671859	77.03	962	191	25	7	953	2465820	2466766	2e-149	525	46170_290.fna
USA300HOU_RS07650|lukS	LT671859	75.74	643	138	16	169	803	2463539	2464171	6e-84	307	46170_290.fna
USA300HOU_RS07645|lukF	FHAC01000003	100	984	0	0	1	984	103457	102474	0	1818	1280_6066.fna
USA300HOU_RS07645|lukF	FHAC01000012	82.3	972	166	6	7	975	37312	38280	0	837	1280_6066.fna
USA300HOU_RS07645|lukF	FHAC01000006	77.03	962	191	25	7	953	66253	67199	2e-149	525	1280_6066.fna
USA300HOU_RS07650|lukS	FHAC01000003	100	939	0	0	1	939	104391	103453	0	1735	1280_6066.fna
USA300HOU_RS07650|lukS	FHAC01000006	75.74	643	138	16	169	803	63973	64605	6e-84	307	1280_6066.fna
USA300HOU_RS07645|lukF	CP032468	82.14	974	166	8	7	975	1179377	1180347	0	828	46170_1188.fna
USA300HOU_RS07645|lukF	CP032468	77.03	962	191	26	7	953	416494	415548	2e-149	525	46170_1188.fna
USA300HOU_RS07650|lukS	CP032468	75.74	643	138	16	169	803	418775	418143	6e-84	307	46170_1188.fna
USA300HOU_RS07645|lukF	CYMS01000009	82.41	972	165	6	7	975	75220	74252	0	843	1280_4461.contig
USA300HOU_RS07645|lukF	CYMS01000001	77.03	962	191	26	7	953	42335	41389	2e-149	525	1280_4461.contig
USA300HOU_RS07650|lukS	CYMS01000001	75.74	643	138	16	169	803	44616	43984	7e-84	307	1280_4461.contig
USA300HOU_RS07645|lukF	JDLK01000001	100	984	0	0	1	984	999774	998791	0	1818	1410821_3.fna
USA300HOU_RS07645|lukF	JDLK01000009	82.3	972	166	6	7	975	19491	18523	0	837	1410821_3.fna
USA300HOU_RS07645|lukF	JDLK01000002	77.03	962	191	25	7	953	225778	226724	2e-149	525	1410821_3.fna
USA300HOU_RS07650|lukS	JDLK01000001	100	939	0	0	1	939	1000708	999770	0	1735	1410821_3.fna
USA300HOU_RS07650|lukS	JDLK01000002	75.74	643	138	16	169	803	223498	224130	6e-84	307	1410821_3.fna
USA300HOU_RS07645|lukF	NDNO01000016	100	984	0	0	1	984	378108	379091	0	1818	1280_12340.fna
USA300HOU_RS07645|lukF	NDNO01000035	82.3	972	166	6	7	975	37321	38289	0	837	1280_12340.fna
USA300HOU_RS07645|lukF	NDNO01000045	77.03	962	191	25	7	953	225403	226349	2e-149	525	1280_12340.fna
USA300HOU_RS07650|lukS	NDNO01000016	100	939	0	0	1	939	377174	378112	0	1735	1280_12340.fna
USA300HOU_RS07650|lukS	NDNO01000045	75.74	643	138	16	169	803	223123	223755	6e-84	307	1280_12340.fna
USA300HOU_RS07645|lukF	JETU01000008	82.3	972	166	6	7	975	44889	43921	0	837	1417216_3.fna
USA300HOU_RS07645|lukF	JETU01000001	77.03	962	191	25	7	953	365354	366300	2e-149	525	1417216_3.fna
USA300HOU_RS07650|lukS	JETU01000001	75.74	643	138	16	169	803	363074	363706	6e-84	307	1417216_3.fna
USA300HOU_RS07645|lukF	CSDQ01000002	100	984	0	0	1	984	242906	243889	0	1818	1280_3839.contig
USA300HOU_RS07645|lukF	CSDQ01000031	82.3	972	166	6	7	975	12583	11615	0	837	1280_3839.contig
USA300HOU_RS07645|lukF	CSDQ01000006	77.03	962	191	26	7	953	79193	78247	2e-149	525	1280_3839.contig
USA300HOU_RS07650|lukS	CSDQ01000002	100	939	0	0	1	939	241972	242910	0	1735	1280_3839.contig
USA300HOU_RS07650|lukS	CSDQ01000006	75.74	643	138	16	169	803	81473	80841	6e-84	307	1280_3839.contig
USA300HOU_RS07645|lukF	RIYH01000004	100	984	0	0	1	984	242084	243067	0	1818	1280_18577.fna
USA300HOU_RS07645|lukF	RIYH01000010	82.3	972	166	6	7	975	18439	17471	0	837	1280_18577.fna
USA300HOU_RS07645|lukF	RIYH01000001	77.03	962	191	25	7	953	66310	67256	2e-149	525	1280_18577.fna
USA300HOU_RS07650|lukS	RIYH01000004	100	939	0	0	1	939	241150	242088	0	1735	1280_18577.fna
USA300HOU_RS07650|lukS	RIYH01000001	75.74	643	138	16	169	803	64030	64662	6e-84	307	1280_18577.fna
USA300HOU_RS07645|lukF	JDYZ01000001	99.9	984	1	0	1	984	645086	644103	0	1812	1412715_3.fna
USA300HOU_RS07645|lukF	JDYZ01000001	82.3	972	166	6	7	975	1040202	1039234	0	837	1412715_3.fna
USA300HOU_RS07645|lukF	JDYZ01000002	77.03	962	191	25	7	953	155670	156616	2e-149	525	1412715_3.fna
USA300HOU_RS07650|lukS	JDYZ01000001	100	939	0	0	1	939	646020	645082	0	1735	1412715_3.fna
USA300HOU_RS07650|lukS	JDYZ01000002	75.74	643	138	16	169	803	153390	154022	6e-84	307	1412715_3.fna
USA300HOU_RS07645|lukF	NZ_ADJI01000002	100	984	0	0	1	984	88153	87170	0	1818	553590_4.fna
USA300HOU_RS07645|lukF	NZ_ADJI01000013	82.3	972	166	6	7	975	18760	17792	0	837	553590_4.fna
USA300HOU_RS07645|lukF	NZ_ADJI01000003	77.03	962	191	25	7	953	225869	226815	2e-149	525	553590_4.fna
USA300HOU_RS07650|lukS	NZ_ADJI01000002	100	939	0	0	1	939	89087	88149	0	1735	553590_4.fna
USA300HOU_RS07650|lukS	NZ_ADJI01000003	75.74	643	138	16	169	803	223589	224221	7e-84	307	553590_4.fna
USA300HOU_RS07645|lukF	JBPK01000002	100	984	0	0	1	984	686563	685580	0	1818	1409543_3.fna
USA300HOU_RS07645|lukF	JBPK01000009	82.3	972	166	6	7	975	152941	151973	0	837	1409543_3.fna
USA300HOU_RS07645|lukF	JBPK01000003	77.03	962	191	25	7	953	365254	366200	2e-149	525	1409543_3.fna
USA300HOU_RS07650|lukS	JBPK01000002	100	939	0	0	1	939	687497	686559	0	1735	1409543_3.fna
USA300HOU_RS07650|lukS	JBPK01000003	75.74	643	138	16	169	803	362974	363606	7e-84	307	1409543_3.fna
USA300HOU_RS07645|lukF	JEVA01000004	100	984	0	0	1	984	117564	116581	0	1818	1417147_3.fna
USA300HOU_RS07645|lukF	JEVA01000009	82.3	972	166	6	7	975	46070	45102	0	837	1417147_3.fna
USA300HOU_RS07645|lukF	JEVA01000003	77.03	962	191	25	7	953	66596	67542	2e-149	525	1417147_3.fna
USA300HOU_RS07650|lukS	JEVA01000004	100	939	0	0	1	939	118498	117560	0	1735	1417147_3.fna
USA300HOU_RS07650|lukS	JEVA01000003	75.74	643	138	16	169	803	64316	64948	6e-84	307	1417147_3.fna
USA300HOU_RS07645|lukF	AP023034	100	984	0	0	1	984	1528107	1527124	0	1818	1280_28360.fna
USA300HOU_RS07645|lukF	AP023034	82.3	972	166	6	7	975	1924054	1923086	0	837	1280_28360.fna
USA300HOU_RS07645|lukF	AP023034	77.03	962	191	25	7	953	2525077	2526023	2e-149	525	1280_28360.fna
USA300HOU_RS07650|lukS	AP023034	100	939	0	0	1	939	1529041	1528103	0	1735	1280_28360.fna
USA300HOU_RS07650|lukS	AP023034	75.74	643	138	16	169	803	2522797	2523429	6e-84	307	1280_28360.fna
USA300HOU_RS07645|lukF	JDPJ01000005	100	984	0	0	1	984	686526	685543	0	1818	1411541_3.fna
USA300HOU_RS07645|lukF	JDPJ01000005	82.3	972	166	6	7	975	1082471	1081503	0	837	1411541_3.fna
USA300HOU_RS07645|lukF	JDPJ01000007	77.03	962	191	25	7	953	65948	66894	2e-149	525	1411541_3.fna
USA300HOU_RS07650|lukS	JDPJ01000005	100	939	0	0	1	939	687460	686522	0	1735	1411541_3.fna
USA300HOU_RS07650|lukS	JDPJ01000007	75.74	643	138	16	169	803	63668	64300	6e-84	307	1411541_3.fna
USA300HOU_RS07645|lukF	AGTY01000052	82.41	972	165	6	7	975	18469	17501	0	843	904737_3.fna
USA300HOU_RS07645|lukF	AGTY01000053	77.03	962	191	26	7	953	78505	77559	2e-149	525	904737_3.fna
USA300HOU_RS07650|lukS	AGTY01000053	75.74	643	138	16	169	803	80786	80154	6e-84	307	904737_3.fna
USA300HOU_RS07645|lukF	JBPC01000002	100	984	0	0	1	984	938180	937197	0	1818	1409554_3.fna
USA300HOU_RS07645|lukF	JBPC01000005	82.3	972	166	6	7	975	162599	161631	0	837	1409554_3.fna
USA300HOU_RS07645|lukF	JBPC01000003	77.03	962	191	25	7	953	365336	366282	2e-149	525	1409554_3.fna
USA300HOU_RS07650|lukS	JBPC01000002	100	939	0	0	1	939	939114	938176	0	1735	1409554_3.fna
USA300HOU_RS07650|lukS	JBPC01000003	75.74	643	138	16	169	803	363056	363688	6e-84	307	1409554_3.fna
USA300HOU_RS07645|lukF	CSDW01000004	100	984	0	0	1	984	242918	243901	0	1818	1280_4011.contig
USA300HOU_RS07645|lukF	CSDW01000014	82.3	972	166	6	7	975	18410	17442	0	837	1280_4011.contig
USA300HOU_RS07645|lukF	CSDW01000002	77.03	962	191	25	7	953	225416	226362	2e-149	525	1280_4011.contig
USA300HOU_RS07650|lukS	CSDW01000004	100	939	0	0	1	939	241984	242922	0	1735	1280_4011.contig
USA300HOU_RS07650|lukS	CSDW01000002	75.74	643	138	16	169	803	223136	223768	6e-84	307	1280_4011.contig
USA300HOU_RS07645|lukF	JDJC01000008	100	984	0	0	1	984	103920	102937	0	1818	1410754_3.fna
USA300HOU_RS07645|lukF	JDJC01000014	82.3	972	166	6	7	975	19491	18523	0	837	1410754_3.fna
USA300HOU_RS07645|lukF	JDJC01000004	77.03	962	191	25	7	953	248035	248981	2e-149	525	1410754_3.fna
USA300HOU_RS07650|lukS	JDJC01000008	100	939	0	0	1	939	104854	103916	0	1735	1410754_3.fna
USA300HOU_RS07650|lukS	JDJC01000004	75.74	643	138	16	169	803	245755	246387	6e-84	307	1410754_3.fna
USA300HOU_RS07645|lukF	JACGYF010000010	82.2	972	167	6	7	975	17952	16984	0	832	1280_28619.fna
USA300HOU_RS07645|lukF	JACGYF010000003	77.03	962	191	25	7	953	247491	248437	2e-149	525	1280_28619.fna
USA300HOU_RS07650|lukS	JACGYF010000003	75.74	643	138	16	169	803	245210	245842	6e-84	307	1280_28619.fna
USA300HOU_RS07645|lukF	CYKT01000003	100	984	0	0	1	984	350680	351663	0	1818	1280_4492.contig
USA300HOU_RS07645|lukF	CYKT01000005	82.3	972	166	6	7	975	218009	218977	0	837	1280_4492.contig
USA300HOU_RS07645|lukF	CYKT01000002	77.03	962	191	26	7	953	385991	385045	2e-149	525	1280_4492.contig
USA300HOU_RS07650|lukS	CYKT01000003	100	939	0	0	1	939	349746	350684	0	1735	1280_4492.contig
USA300HOU_RS07650|lukS	CYKT01000002	75.74	643	138	16	169	803	388270	387638	6e-84	307	1280_4492.contig
USA300HOU_RS07645|lukF	CSCC01000002	100	984	0	0	1	984	103652	102669	0	1818	1280_4019.contig
USA300HOU_RS07645|lukF	CSCC01000009	82.3	972	166	6	7	975	18455	17487	0	837	1280_4019.contig
USA300HOU_RS07645|lukF	CSCC01000004	77.03	962	191	25	7	953	247093	248039	2e-149	525	1280_4019.contig
USA300HOU_RS07650|lukS	CSCC01000002	100	939	0	0	1	939	104586	103648	0	1735	1280_4019.contig
USA300HOU_RS07650|lukS	CSCC01000004	75.74	643	138	16	169	803	244813	245445	6e-84	307	1280_4019.contig
USA300HOU_RS07645|lukF	MUDK01000035	82.1	972	168	6	7	975	960	1928	0	826	1280_11663.fna
USA300HOU_RS07645|lukF	MUDK01000011	77.03	962	191	25	7	953	973	1919	2e-149	525	1280_11663.fna
USA300HOU_RS07650|lukS	MUDK01000015	75.74	643	138	16	169	803	36002	36634	6e-84	307	1280_11663.fna
USA300HOU_RS07645|lukF	JDWZ01000002	100	984	0	0	1	984	698462	697479	0	1818	1409706_3.fna
USA300HOU_RS07645|lukF	JDWZ01000002	82.3	972	166	6	7	975	1094407	1093439	0	837	1409706_3.fna
USA300HOU_RS07645|lukF	JDWZ01000006	77.03	962	191	25	7	953	248375	249321	2e-149	525	1409706_3.fna
USA300HOU_RS07650|lukS	JDWZ01000002	100	939	0	0	1	939	699396	698458	0	1735	1409706_3.fna
USA300HOU_RS07650|lukS	JDWZ01000006	75.74	643	138	16	169	803	246095	246727	6e-84	307	1409706_3.fna
USA300HOU_RS07645|lukF	CSFE01000002	100	984	0	0	1	984	242896	243879	0	1818	1280_3934.contig
USA300HOU_RS07645|lukF	CSFE01000013	82.3	972	166	6	7	975	18404	17436	0	837	1280_3934.contig
USA300HOU_RS07645|lukF	CSFE01000003	77.03	962	191	25	7	953	225418	226364	2e-149	525	1280_3934.contig
USA300HOU_RS07650|lukS	CSFE01000002	100	939	0	0	1	939	241962	242900	0	1735	1280_3934.contig
USA300HOU_RS07650|lukS	CSFE01000003	75.74	643	138	16	169	803	223138	223770	6e-84	307	1280_3934.contig
USA300HOU_RS07645|lukF	CHEF01000002	100	984	0	0	1	984	103458	102475	0	1818	1280_4657.contig
USA300HOU_RS07645|lukF	CHEF01000010	82.3	972	166	6	7	975	37316	38284	0	837	1280_4657.contig
USA300HOU_RS07645|lukF	CHEF01000003	77.03	962	191	26	7	953	79316	78370	2e-149	525	1280_4657.contig
USA300HOU_RS07650|lukS	CHEF01000002	100	939	0	0	1	939	104392	103454	0	1735	1280_4657.contig
USA300HOU_RS07650|lukS	CHEF01000003	75.74	643	138	16	169	803	81596	80964	6e-84	307	1280_4657.contig
USA300HOU_RS07645|lukF	QVQO01000002	100	984	0	0	1	984	242037	243020	0	1818	1280_17982.fna
USA300HOU_RS07645|lukF	QVQO01000011	82.3	972	166	6	7	975	37298	38266	0	837	1280_17982.fna
USA300HOU_RS07645|lukF	QVQO01000003	77.03	962	191	25	7	953	225362	226308	2e-149	525	1280_17982.fna
USA300HOU_RS07650|lukS	QVQO01000002	100	939	0	0	1	939	241103	242041	0	1735	1280_17982.fna
USA300HOU_RS07650|lukS	QVQO01000003	75.74	643	138	16	169	803	223082	223714	6e-84	307	1280_17982.fna
USA300HOU_RS07645|lukF	CYLJ01000001	100	984	0	0	1	984	103449	102466	0	1818	1280_4505.contig
USA300HOU_RS07645|lukF	CYLJ01000019	82.3	972	166	6	7	975	18378	17410	0	837	1280_4505.contig
USA300HOU_RS07645|lukF	CYLJ01000008	77.03	962	191	26	7	953	84628	83682	2e-149	525	1280_4505.contig
USA300HOU_RS07650|lukS	CYLJ01000001	100	939	0	0	1	939	104383	103445	0	1735	1280_4505.contig
USA300HOU_RS07650|lukS	CYLJ01000008	75.74	643	138	16	169	803	86908	86276	6e-84	307	1280_4505.contig
USA300HOU_RS07645|lukF	CYIL01000007	82.3	972	166	6	7	975	18384	17416	0	837	1280_4473.contig
USA300HOU_RS07645|lukF	CYIL01000001	77.03	962	191	25	7	953	247004	247950	2e-149	525	1280_4473.contig
USA300HOU_RS07650|lukS	CYIL01000001	75.58	643	139	16	169	803	244723	245355	3e-82	302	1280_4473.contig
USA300HOU_RS07645|lukF	JGLQ01000002	100	984	0	0	1	984	134160	133177	0	1818	1418380_3.fna
USA300HOU_RS07645|lukF	JGLQ01000011	82.3	972	166	6	7	975	44789	43821	0	837	1418380_3.fna
USA300HOU_RS07645|lukF	JGLQ01000001	77.03	962	191	25	7	953	363475	364421	2e-149	525	1418380_3.fna
USA300HOU_RS07650|lukS	JGLQ01000002	100	939	0	0	1	939	135094	134156	0	1735	1418380_3.fna
USA300HOU_RS07650|lukS	JGLQ01000001	75.74	643	138	16	169	803	361195	361827	6e-84	307	1418380_3.fna
USA300HOU_RS07645|lukF	CSDR01000003	100	984	0	0	1	984	242907	243890	0	1818	1280_3986.contig
USA300HOU_RS07645|lukF	CSDR01000010	82.3	972	166	6	7	975	18431	17463	0	837	1280_3986.contig
USA300HOU_RS07645|lukF	CSDR01000004	77.03	962	191	25	7	953	225399	226345	2e-149	525	1280_3986.contig
USA300HOU_RS07650|lukS	CSDR01000003	100	939	0	0	1	939	241973	242911	0	1735	1280_3986.contig
USA300HOU_RS07650|lukS	CSDR01000004	75.74	643	138	16	169	803	223119	223751	6e-84	307	1280_3986.contig
USA300HOU_RS07645|lukF	CSCR01000009	82.3	972	166	6	7	975	16823	15855	0	837	1280_3879.contig
USA300HOU_RS07645|lukF	CSCR01000001	77.03	962	191	26	7	953	759432	758486	2e-149	525	1280_3879.contig
USA300HOU_RS07650|lukS	CSCR01000001	75.58	643	139	16	169	803	761713	761081	3e-82	302	1280_3879.contig
USA300HOU_RS07645|lukF	JETL01000005	100	984	0	0	1	984	117459	116476	0	1818	1417197_3.fna
USA300HOU_RS07645|lukF	JETL01000009	82.3	972	166	6	7	975	44686	43718	0	837	1417197_3.fna
USA300HOU_RS07645|lukF	JETL01000004	77.03	962	191	25	7	953	247168	248114	2e-149	525	1417197_3.fna
USA300HOU_RS07650|lukS	JETL01000005	100	939	0	0	1	939	118393	117455	0	1735	1417197_3.fna
USA300HOU_RS07650|lukS	JETL01000004	75.74	643	138	16	169	803	244888	245520	6e-84	307	1417197_3.fna
USA300HOU_RS07645|lukF	JACEUH010000003	82.1	972	168	6	7	975	352983	352015	0	826	1280_28565.fna
USA300HOU_RS07645|lukF	JACEUH010000002	77.03	962	191	25	7	953	247602	248548	2e-149	525	1280_28565.fna
USA300HOU_RS07650|lukS	JACEUH010000002	75.74	643	138	16	169	803	245321	245953	6e-84	307	1280_28565.fna
USA300HOU_RS07645|lukF	PHWP01000007	100	984	0	0	1	984	40218	41201	0	1818	1280_15995.fna
USA300HOU_RS07645|lukF	PHWP01000010	82.3	972	166	6	7	975	18518	17550	0	837	1280_15995.fna
USA300HOU_RS07645|lukF	PHWP01000003	77.03	962	191	26	7	953	79590	78644	2e-149	525	1280_15995.fna
USA300HOU_RS07650|lukS	PHWP01000007	100	939	0	0	1	939	39284	40222	0	1735	1280_15995.fna
USA300HOU_RS07650|lukS	PHWP01000003	75.58	643	139	16	169	803	81870	81238	3e-82	302	1280_15995.fna
USA300HOU_RS07645|lukF	JBHT01000003	100	984	0	0	1	984	712197	711214	0	1818	1409658_3.fna
USA300HOU_RS07645|lukF	JBHT01000003	82.3	972	166	6	7	975	1108144	1107176	0	837	1409658_3.fna
USA300HOU_RS07645|lukF	JBHT01000004	77.03	962	191	25	7	953	365255	366201	2e-149	525	1409658_3.fna
USA300HOU_RS07650|lukS	JBHT01000003	100	939	0	0	1	939	713131	712193	0	1735	1409658_3.fna
USA300HOU_RS07650|lukS	JBHT01000004	75.74	643	138	16	169	803	362975	363607	7e-84	307	1409658_3.fna
USA300HOU_RS07645|lukF	LFVF01000001	100	984	0	0	1	984	356793	357776	0	1818	46170_158.fna
USA300HOU_RS07645|lukF	LFVF01000012	82.3	972	166	6	7	975	18567	17599	0	837	46170_158.fna
USA300HOU_RS07645|lukF	LFVF01000004	77.03	962	191	26	7	953	79218	78272	2e-149	525	46170_158.fna
USA300HOU_RS07650|lukS	LFVF01000001	100	939	0	0	1	939	355859	356797	0	1735	46170_158.fna
USA300HOU_RS07650|lukS	LFVF01000004	75.74	643	138	16	169	803	81498	80866	6e-84	307	46170_158.fna
USA300HOU_RS07645|lukF	JDGF01000004	100	984	0	0	1	984	309902	308919	0	1818	1410742_3.fna
USA300HOU_RS07645|lukF	JDGF01000013	82.3	972	166	6	7	975	19491	18523	0	837	1410742_3.fna
USA300HOU_RS07645|lukF	JDGF01000003	77.03	962	191	25	7	953	248034	248980	2e-149	525	1410742_3.fna
USA300HOU_RS07650|lukS	JDGF01000004	100	939	0	0	1	939	310836	309898	0	1735	1410742_3.fna
USA300HOU_RS07650|lukS	JDGF01000003	75.74	643	138	16	169	803	245754	246386	6e-84	307	1410742_3.fna
USA300HOU_RS07645|lukF	CP043386	100	984	0	0	1	984	1566671	1565688	0	1818	1280_21781.fna
USA300HOU_RS07645|lukF	CP043386	82.3	972	166	6	7	975	1962618	1961650	0	837	1280_21781.fna
USA300HOU_RS07645|lukF	CP043386	77.03	962	191	25	7	953	2550299	2551245	2e-149	525	1280_21781.fna
USA300HOU_RS07650|lukS	CP043386	100	939	0	0	1	939	1567605	1566667	0	1735	1280_21781.fna
USA300HOU_RS07650|lukS	CP043386	75.74	643	138	16	169	803	2548019	2548651	6e-84	307	1280_21781.fna
USA300HOU_RS07645|lukF	JACGYO010000012	82.2	972	167	6	7	975	39968	40936	0	832	1280_29080.fna
USA300HOU_RS07645|lukF	JACGYO010000003	77.03	962	191	26	7	953	79181	78235	2e-149	525	1280_29080.fna
USA300HOU_RS07650|lukS	JACGYO010000003	75.74	643	138	16	169	803	81462	80830	6e-84	307	1280_29080.fna
USA300HOU_RS07645|lukF	JYBA01000001	82.41	972	165	6	7	975	336955	337923	0	843	1280_4819.fna
USA300HOU_RS07645|lukF	JYBA01000013	77.03	962	191	25	7	953	253106	254052	2e-149	525	1280_4819.fna
USA300HOU_RS07650|lukS	JYBA01000013	75.74	643	138	16	169	803	250825	251457	7e-84	307	1280_4819.fna
USA300HOU_RS07645|lukF	NMWI01000003	100	984	0	0	1	984	242721	243704	0	1818	46170_349.fna
USA300HOU_RS07645|lukF	NMWI01000012	82.3	972	166	6	7	975	37348	38316	0	837	46170_349.fna
USA300HOU_RS07645|lukF	NMWI01000002	77.03	962	191	25	7	953	66118	67064	2e-149	525	46170_349.fna
USA300HOU_RS07650|lukS	NMWI01000003	100	939	0	0	1	939	241787	242725	0	1735	46170_349.fna
USA300HOU_RS07650|lukS	NMWI01000002	75.74	643	138	16	169	803	63838	64470	6e-84	307	46170_349.fna
USA300HOU_RS07645|lukF	JDQQ01000007	100	984	0	0	1	984	180600	179617	0	1818	1411576_3.fna
USA300HOU_RS07645|lukF	JDQQ01000015	82.3	972	166	6	7	975	19491	18523	0	837	1411576_3.fna
USA300HOU_RS07645|lukF	JDQQ01000011	77.03	962	191	25	7	953	66170	67116	2e-149	525	1411576_3.fna
USA300HOU_RS07650|lukS	JDQQ01000007	100	939	0	0	1	939	181534	180596	0	1735	1411576_3.fna
USA300HOU_RS07650|lukS	JDQQ01000011	75.74	643	138	16	169	803	63890	64522	6e-84	307	1411576_3.fna
USA300HOU_RS07645|lukF	BHAC01000005	82.2	972	167	6	7	975	39967	40935	0	832	46170_564.fna
USA300HOU_RS07645|lukF	BHAC01000002	77.03	962	191	25	7	953	225677	226623	2e-149	525	46170_564.fna
USA300HOU_RS07650|lukS	BHAC01000002	75.74	643	138	16	169	803	223396	224028	6e-84	307	46170_564.fna
USA300HOU_RS07645|lukF	1280.4972.con.0015	99.9	984	1	0	1	984	356791	357774	0	1812	1280_4972.fna
USA300HOU_RS07645|lukF	1280.4972.con.0013	82.3	972	166	6	7	975	18972	18004	0	837	1280_4972.fna
USA300HOU_RS07645|lukF	1280.4972.con.0012	77.03	962	191	25	7	953	248747	249693	2e-149	525	1280_4972.fna
USA300HOU_RS07650|lukS	1280.4972.con.0015	100	939	0	0	1	939	355857	356795	0	1735	1280_4972.fna
USA300HOU_RS07650|lukS	1280.4972.con.0012	75.74	643	138	16	169	803	246467	247099	6e-84	307	1280_4972.fna
USA300HOU_RS07645|lukF	JFSL01000009	82.3	972	166	6	7	975	45162	44194	0	837	1421848_3.fna
USA300HOU_RS07645|lukF	JFSL01000001	77.03	962	191	25	7	953	252075	253021	2e-149	525	1421848_3.fna
USA300HOU_RS07650|lukS	JFSL01000001	75.74	643	138	16	169	803	249795	250427	6e-84	307	1421848_3.fna
USA300HOU_RS07645|lukF	JDYU01000001	100	984	0	0	1	984	938669	937686	0	1818	1412747_3.fna
USA300HOU_RS07645|lukF	JDYU01000003	82.3	972	166	6	7	975	355460	354492	0	837	1412747_3.fna
USA300HOU_RS07645|lukF	JDYU01000002	77.03	962	191	25	7	953	365252	366198	2e-149	525	1412747_3.fna
USA300HOU_RS07650|lukS	JDYU01000001	100	939	0	0	1	939	939603	938665	0	1735	1412747_3.fna
USA300HOU_RS07650|lukS	JDYU01000002	75.74	643	138	16	169	803	362972	363604	6e-84	307	1412747_3.fna
USA300HOU_RS07645|lukF	JFSK01000002	100	984	0	0	1	984	134113	133130	0	1818	1421851_3.fna
USA300HOU_RS07645|lukF	JFSK01000011	82.3	972	166	6	7	975	45853	44885	0	837	1421851_3.fna
USA300HOU_RS07645|lukF	JFSK01000008	77.03	962	191	25	7	953	66596	67542	2e-149	525	1421851_3.fna
USA300HOU_RS07650|lukS	JFSK01000002	100	939	0	0	1	939	135047	134109	0	1735	1421851_3.fna
USA300HOU_RS07650|lukS	JFSK01000008	75.74	643	138	16	169	803	64316	64948	7e-84	307	1421851_3.fna
USA300HOU_RS07645|lukF	CSEP01000002	100	984	0	0	1	984	243009	243992	0	1818	1280_3917.contig
USA300HOU_RS07645|lukF	CSEP01000012	82.3	972	166	6	7	975	37309	38277	0	837	1280_3917.contig
USA300HOU_RS07645|lukF	CSEP01000006	77.03	962	191	26	7	953	79145	78199	2e-149	525	1280_3917.contig
USA300HOU_RS07650|lukS	CSEP01000002	100	939	0	0	1	939	242075	243013	0	1735	1280_3917.contig
USA300HOU_RS07650|lukS	CSEP01000006	75.74	643	138	16	169	803	81425	80793	6e-84	307	1280_3917.contig
USA300HOU_RS07645|lukF	JDMN01000002	100	984	0	0	1	984	686408	685425	0	1818	1410853_3.fna
USA300HOU_RS07645|lukF	JDMN01000010	82.3	972	166	6	7	975	19491	18523	0	837	1410853_3.fna
USA300HOU_RS07645|lukF	JDMN01000003	77.03	962	191	25	7	953	225778	226724	2e-149	525	1410853_3.fna
USA300HOU_RS07650|lukS	JDMN01000002	100	939	0	0	1	939	687342	686404	0	1735	1410853_3.fna
USA300HOU_RS07650|lukS	JDMN01000003	75.74	643	138	16	169	803	223498	224130	6e-84	307	1410853_3.fna
USA300HOU_RS07645|lukF	CYIU01000003	100	984	0	0	1	984	242892	243875	0	1818	1280_4414.contig
USA300HOU_RS07645|lukF	CYIU01000011	82.3	972	166	6	7	975	37295	38263	0	837	1280_4414.contig
USA300HOU_RS07645|lukF	CYIU01000002	77.03	962	191	26	7	953	487138	486192	2e-149	525	1280_4414.contig
USA300HOU_RS07650|lukS	CYIU01000003	100	939	0	0	1	939	241958	242896	0	1735	1280_4414.contig
USA300HOU_RS07650|lukS	CYIU01000002	75.74	643	138	16	169	803	489418	488786	6e-84	307	1280_4414.contig
USA300HOU_RS07645|lukF	QVQK01000001	100	984	0	0	1	984	242035	243018	0	1818	1280_17987.fna
USA300HOU_RS07645|lukF	QVQK01000016	82.3	972	166	6	7	975	37298	38266	0	837	1280_17987.fna
USA300HOU_RS07645|lukF	QVQK01000002	77.03	962	191	25	7	953	225432	226378	2e-149	525	1280_17987.fna
USA300HOU_RS07650|lukS	QVQK01000001	100	939	0	0	1	939	241101	242039	0	1735	1280_17987.fna
USA300HOU_RS07650|lukS	QVQK01000002	75.74	643	138	16	169	803	223152	223784	6e-84	307	1280_17987.fna
USA300HOU_RS07645|lukF	CSDV01000002	100	984	0	0	1	984	103453	102470	0	1818	1280_4010.contig
USA300HOU_RS07645|lukF	CSDV01000011	82.3	972	166	6	7	975	37312	38280	0	837	1280_4010.contig
USA300HOU_RS07645|lukF	CSDV01000003	77.03	962	191	26	7	953	79307	78361	2e-149	525	1280_4010.contig
USA300HOU_RS07650|lukS	CSDV01000002	100	939	0	0	1	939	104387	103449	0	1735	1280_4010.contig
USA300HOU_RS07650|lukS	CSDV01000003	75.74	643	138	16	169	803	81587	80955	6e-84	307	1280_4010.contig
USA300HOU_RS07645|lukF	JABXBT010000003	99.9	984	0	1	1	984	356824	357806	0	1810	1280_29093.fna
USA300HOU_RS07645|lukF	JABXBT010000007	82.3	972	166	6	7	975	37231	38199	0	837	1280_29093.fna
USA300HOU_RS07645|lukF	JABXBT010000004	77.03	962	191	26	7	953	152133	151187	2e-149	525	1280_29093.fna
USA300HOU_RS07650|lukS	JABXBT010000003	100	939	0	0	1	939	355890	356828	0	1735	1280_29093.fna
USA300HOU_RS07650|lukS	JABXBT010000004	75.74	643	138	16	169	803	154413	153781	6e-84	307	1280_29093.fna
USA300HOU_RS07645|lukF	JBJF01000001	100	984	0	0	1	984	1048616	1047633	0	1818	1409614_3.fna
USA300HOU_RS07645|lukF	JBJF01000001	82.3	972	166	6	7	975	1444562	1443594	0	837	1409614_3.fna
USA300HOU_RS07645|lukF	JBJF01000002	77.03	962	191	25	7	953	365254	366200	2e-149	525	1409614_3.fna
USA300HOU_RS07650|lukS	JBJF01000001	100	939	0	0	1	939	1049550	1048612	0	1735	1409614_3.fna
USA300HOU_RS07650|lukS	JBJF01000002	75.74	643	138	16	169	803	362974	363606	6e-84	307	1409614_3.fna
USA300HOU_RS07645|lukF	JFRY01000003	100	984	0	0	1	984	117891	116908	0	1818	1421890_3.fna
USA300HOU_RS07645|lukF	JFRY01000008	82.3	972	166	6	7	975	45164	44196	0	837	1421890_3.fna
USA300HOU_RS07645|lukF	JFRY01000002	77.03	962	191	25	7	953	365254	366200	2e-149	525	1421890_3.fna
USA300HOU_RS07650|lukS	JFRY01000003	100	939	0	0	1	939	118825	117887	0	1735	1421890_3.fna
USA300HOU_RS07650|lukS	JFRY01000002	75.74	643	138	16	169	803	362974	363606	6e-84	307	1421890_3.fna
USA300HOU_RS07645|lukF	LGWO01000019	100	984	0	0	1	984	104258	105241	0	1818	1280_13683.fna
USA300HOU_RS07645|lukF	LGWO01000021	82.3	972	166	6	7	975	37241	38209	0	837	1280_13683.fna
USA300HOU_RS07645|lukF	LGWO01000008	77.03	962	191	26	7	953	43726	42780	2e-149	525	1280_13683.fna
USA300HOU_RS07650|lukS	LGWO01000019	100	939	0	0	1	939	103324	104262	0	1735	1280_13683.fna
USA300HOU_RS07650|lukS	LGWO01000008	75.74	643	138	16	169	803	46006	45374	6e-84	307	1280_13683.fna
USA300HOU_RS07645|lukF	JABFKL010000003	100	984	0	0	1	984	103488	102505	0	1818	1280_27493.fna
USA300HOU_RS07645|lukF	JABFKL010000006	82.3	972	166	6	7	975	18439	17471	0	837	1280_27493.fna
USA300HOU_RS07645|lukF	JABFKL010000001	77.03	962	191	26	7	953	786192	785246	2e-149	525	1280_27493.fna
USA300HOU_RS07650|lukS	JABFKL010000003	100	939	0	0	1	939	104422	103484	0	1735	1280_27493.fna
USA300HOU_RS07650|lukS	JABFKL010000001	75.74	643	138	16	169	803	788472	787840	6e-84	307	1280_27493.fna
USA300HOU_RS07645|lukF	JDPA01000003	100	984	0	0	1	984	812079	811096	0	1818	1411532_3.fna
USA300HOU_RS07645|lukF	JDPA01000003	82.3	972	166	6	7	975	1208025	1207057	0	837	1411532_3.fna
USA300HOU_RS07645|lukF	JDPA01000003	77.03	962	191	25	7	953	1795601	1796547	2e-149	525	1411532_3.fna
USA300HOU_RS07650|lukS	JDPA01000003	100	939	0	0	1	939	813013	812075	0	1735	1411532_3.fna
USA300HOU_RS07650|lukS	JDPA01000003	75.74	643	138	16	169	803	1793321	1793953	6e-84	307	1411532_3.fna
USA300HOU_RS07645|lukF	CFPW01000002	100	984	0	0	1	984	103450	102467	0	1818	1280_4713.contig
USA300HOU_RS07645|lukF	CFPW01000013	82.3	972	166	6	7	975	18398	17430	0	837	1280_4713.contig
USA300HOU_RS07645|lukF	CFPW01000007	77.03	962	191	26	7	953	79289	78343	2e-149	525	1280_4713.contig
USA300HOU_RS07650|lukS	CFPW01000002	100	939	0	0	1	939	104384	103446	0	1735	1280_4713.contig
USA300HOU_RS07650|lukS	CFPW01000007	75.74	643	138	16	169	803	81569	80937	6e-84	307	1280_4713.contig
USA300HOU_RS07645|lukF	CYJY01000004	100	984	0	0	1	984	242849	243832	0	1818	1280_4410.contig
USA300HOU_RS07645|lukF	CYJY01000002	77.03	962	191	25	7	953	246923	247869	2e-149	525	1280_4410.contig
USA300HOU_RS07645|lukF	CYJY01000009	79.77	529	99	8	451	975	39859	40383	5e-105	377	1280_4410.contig
USA300HOU_RS07645|lukF	CYJY01000009	88.56	201	23	0	7	207	39369	39569	5e-65	244	1280_4410.contig
USA300HOU_RS07650|lukS	CYJY01000004	100	939	0	0	1	939	241915	242853	0	1735	1280_4410.contig
USA300HOU_RS07650|lukS	CYJY01000002	75.74	643	138	16	169	803	244643	245275	6e-84	307	1280_4410.contig
USA300HOU_RS07645|lukF	JDXR01000001	100	984	0	0	1	984	1048962	1047979	0	1818	1409544_3.fna
USA300HOU_RS07645|lukF	JDXR01000001	82.3	972	166	6	7	975	1447111	1446143	0	837	1409544_3.fna
USA300HOU_RS07645|lukF	JDXR01000003	77.03	962	191	25	7	953	249371	250317	2e-149	525	1409544_3.fna
USA300HOU_RS07650|lukS	JDXR01000001	100	939	0	0	1	939	1049896	1048958	0	1735	1409544_3.fna
USA300HOU_RS07650|lukS	JDXR01000003	75.74	643	138	16	169	803	247091	247723	7e-84	307	1409544_3.fna
USA300HOU_RS07645|lukF	JBLA01000003	82.3	972	166	6	7	975	453565	452597	0	837	1409564_3.fna
USA300HOU_RS07645|lukF	JBLA01000002	77.03	962	191	25	7	953	365353	366299	2e-149	525	1409564_3.fna
USA300HOU_RS07650|lukS	JBLA01000002	75.74	643	138	16	169	803	363073	363705	6e-84	307	1409564_3.fna
USA300HOU_RS07645|lukF	JBJC01000005	100	984	0	0	1	984	180470	179487	0	1818	1409617_3.fna
USA300HOU_RS07645|lukF	JBJC01000007	82.3	972	166	6	7	975	44889	43921	0	837	1409617_3.fna
USA300HOU_RS07645|lukF	JBJC01000003	77.03	962	191	25	7	953	155593	156539	2e-149	525	1409617_3.fna
USA300HOU_RS07650|lukS	JBJC01000005	100	939	0	0	1	939	181404	180466	0	1735	1409617_3.fna
USA300HOU_RS07650|lukS	JBJC01000003	75.74	643	138	16	169	803	153313	153945	7e-84	307	1409617_3.fna
USA300HOU_RS07645|lukF	1280.24763.con.0008	100	984	0	0	1	984	103366	102383	0	1818	1280_24763.fna
USA300HOU_RS07645|lukF	1280.24763.con.0011	82.3	972	166	6	7	975	37221	38189	0	837	1280_24763.fna
USA300HOU_RS07645|lukF	1280.24763.con.0002	77.03	962	191	25	7	953	65637	66583	2e-149	525	1280_24763.fna
USA300HOU_RS07650|lukS	1280.24763.con.0008	100	939	0	0	1	939	104300	103362	0	1735	1280_24763.fna
USA300HOU_RS07650|lukS	1280.24763.con.0002	75.74	643	138	16	169	803	63357	63989	6e-84	307	1280_24763.fna
USA300HOU_RS07645|lukF	JDHT01000010	82.3	972	166	6	7	975	19491	18523	0	837	1410713_3.fna
USA300HOU_RS07645|lukF	JDHT01000004	77.03	962	191	25	7	953	248033	248979	2e-149	525	1410713_3.fna
USA300HOU_RS07650|lukS	JDHT01000004	75.74	643	138	16	169	803	245753	246385	6e-84	307	1410713_3.fna
USA300HOU_RS07645|lukF	LS483316	82.2	972	166	7	7	975	1895699	1894732	0	830	1280_16916.fna
USA300HOU_RS07645|lukF	LS483316	77.03	962	191	25	7	953	2535800	2536746	2e-149	525	1280_16916.fna
USA300HOU_RS07650|lukS	LS483316	75.74	643	138	16	169	803	2533519	2534151	6e-84	307	1280_16916.fna
USA300HOU_RS07645|lukF	CHEV01000002	100	984	0	0	1	984	103475	102492	0	1818	1280_4726.contig
USA300HOU_RS07645|lukF	CHEV01000012	82.3	972	166	6	7	975	18396	17428	0	837	1280_4726.contig
USA300HOU_RS07645|lukF	CHEV01000003	77.03	962	191	26	7	953	154212	153266	2e-149	525	1280_4726.contig
USA300HOU_RS07650|lukS	CHEV01000002	100	939	0	0	1	939	104409	103471	0	1735	1280_4726.contig
USA300HOU_RS07650|lukS	CHEV01000003	75.74	643	138	16	169	803	156492	155860	6e-84	307	1280_4726.contig
USA300HOU_RS07645|lukF	NDKK01000016	100	984	0	0	1	984	21752	20769	0	1818	1280_12291.fna
USA300HOU_RS07645|lukF	NDKK01000033	82.3	972	166	6	7	975	18402	17434	0	837	1280_12291.fna
USA300HOU_RS07645|lukF	NDKK01000055	77.03	962	191	26	7	953	75651	74705	2e-149	525	1280_12291.fna
USA300HOU_RS07650|lukS	NDKK01000016	100	939	0	0	1	939	22686	21748	0	1735	1280_12291.fna
USA300HOU_RS07650|lukS	NDKK01000055	75.74	643	138	16	169	803	77931	77299	6e-84	307	1280_12291.fna
USA300HOU_RS07645|lukF	JZAL01000005	82.3	972	166	6	7	975	37472	38440	0	837	1280_3377.fna
USA300HOU_RS07645|lukF	JZAL01000001	77.03	962	191	25	7	953	247427	248373	2e-149	525	1280_3377.fna
USA300HOU_RS07650|lukS	JZAL01000001	75.58	643	139	16	169	803	245146	245778	3e-82	302	1280_3377.fna
USA300HOU_RS07645|lukF	JDGE01000001	100	984	0	0	1	984	942334	941351	0	1818	1410739_3.fna
USA300HOU_RS07645|lukF	JDGE01000010	82.3	972	166	6	7	975	19491	18523	0	837	1410739_3.fna
USA300HOU_RS07645|lukF	JDGE01000003	77.03	962	191	25	7	953	226743	227689	2e-149	525	1410739_3.fna
USA300HOU_RS07650|lukS	JDGE01000001	100	939	0	0	1	939	943268	942330	0	1735	1410739_3.fna
USA300HOU_RS07650|lukS	JDGE01000003	75.74	643	138	16	169	803	224463	225095	6e-84	307	1410739_3.fna
USA300HOU_RS07645|lukF	WKGK01000016	82.3	972	166	6	7	975	37233	38201	0	837	1280_23603.fna
USA300HOU_RS07645|lukF	WKGK01000006	77.03	962	191	25	7	953	66121	67067	2e-149	525	1280_23603.fna
USA300HOU_RS07650|lukS	WKGK01000006	75.74	643	138	16	169	803	63840	64472	6e-84	307	1280_23603.fna
USA300HOU_RS07645|lukF	CSGK01000003	100	984	0	0	1	984	103460	102477	0	1818	1280_3970.contig
USA300HOU_RS07645|lukF	CSGK01000010	82.3	972	166	6	7	975	38554	39522	0	837	1280_3970.contig
USA300HOU_RS07645|lukF	CSGK01000002	77.03	962	191	26	7	953	363601	362655	2e-149	525	1280_3970.contig
USA300HOU_RS07650|lukS	CSGK01000003	100	939	0	0	1	939	104394	103456	0	1735	1280_3970.contig
USA300HOU_RS07650|lukS	CSGK01000002	75.74	643	138	16	169	803	365881	365249	6e-84	307	1280_3970.contig
USA300HOU_RS07645|lukF	CSHZ01000002	100	984	0	0	1	984	103455	102472	0	1818	1280_3951.contig
USA300HOU_RS07645|lukF	CSHZ01000010	82.3	972	166	6	7	975	37315	38283	0	837	1280_3951.contig
USA300HOU_RS07645|lukF	CSHZ01000007	77.03	962	191	26	7	953	79314	78368	2e-149	525	1280_3951.contig
USA300HOU_RS07650|lukS	CSHZ01000002	100	939	0	0	1	939	104389	103451	0	1735	1280_3951.contig
USA300HOU_RS07650|lukS	CSHZ01000007	75.74	643	138	16	169	803	81594	80962	7e-84	307	1280_3951.contig
USA300HOU_RS07645|lukF	JDLZ01000002	100	984	0	0	1	984	698529	697546	0	1818	1410837_3.fna
USA300HOU_RS07645|lukF	JDLZ01000013	82.3	972	166	6	7	975	15597	14629	0	837	1410837_3.fna
USA300HOU_RS07645|lukF	JDLZ01000003	77.03	962	191	25	7	953	225778	226724	2e-149	525	1410837_3.fna
USA300HOU_RS07650|lukS	JDLZ01000002	100	939	0	0	1	939	699463	698525	0	1735	1410837_3.fna
USA300HOU_RS07650|lukS	JDLZ01000003	75.74	643	138	16	169	803	223498	224130	6e-84	307	1410837_3.fna
USA300HOU_RS07645|lukF	CSBM01000002	100	984	0	0	1	984	103466	102483	0	1818	1280_3822.contig
USA300HOU_RS07645|lukF	CSBM01000010	82.3	972	166	6	7	975	18396	17428	0	837	1280_3822.contig
USA300HOU_RS07645|lukF	CSBM01000003	77.03	962	191	26	7	953	79314	78368	2e-149	525	1280_3822.contig
USA300HOU_RS07650|lukS	CSBM01000002	100	939	0	0	1	939	104400	103462	0	1735	1280_3822.contig
USA300HOU_RS07650|lukS	CSBM01000003	75.74	643	138	16	169	803	81594	80962	6e-84	307	1280_3822.contig
USA300HOU_RS07645|lukF	JECJ01000008	100	984	0	0	1	984	134605	133622	0	1818	1412705_3.fna
USA300HOU_RS07645|lukF	JECJ01000012	82.3	972	166	6	7	975	39043	38075	0	837	1412705_3.fna
USA300HOU_RS07645|lukF	JECJ01000004	77.03	962	191	25	7	953	226566	227512	2e-149	525	1412705_3.fna
USA300HOU_RS07650|lukS	JECJ01000008	100	939	0	0	1	939	135539	134601	0	1735	1412705_3.fna
USA300HOU_RS07650|lukS	JECJ01000004	75.74	643	138	16	169	803	224286	224918	7e-84	307	1412705_3.fna
USA300HOU_RS07645|lukF	CP031890	100	984	0	0	1	984	1556586	1555603	0	1818	1280_21785.fna
USA300HOU_RS07645|lukF	CP031890	82.3	972	166	6	7	975	1952173	1951205	0	837	1280_21785.fna
USA300HOU_RS07645|lukF	CP031890	77.03	962	191	25	7	953	2539660	2540606	2e-149	525	1280_21785.fna
USA300HOU_RS07650|lukS	CP031890	100	939	0	0	1	939	1557520	1556582	0	1735	1280_21785.fna
USA300HOU_RS07650|lukS	CP031890	75.74	643	138	16	169	803	2537380	2538012	6e-84	307	1280_21785.fna
USA300HOU_RS07645|lukF	CYJS01000021	82.3	972	166	6	7	975	18399	17431	0	837	1280_4386.contig
USA300HOU_RS07645|lukF	CYJS01000005	77.03	962	191	26	7	953	175294	174348	2e-149	525	1280_4386.contig
USA300HOU_RS07650|lukS	CYJS01000005	75.58	643	139	16	169	803	177575	176943	3e-82	302	1280_4386.contig
USA300HOU_RS07645|lukF	CYLY01000006	100	984	0	0	1	984	134500	133517	0	1818	1280_4487.contig
USA300HOU_RS07645|lukF	CYLY01000010	82.3	972	166	6	7	975	18398	17430	0	837	1280_4487.contig
USA300HOU_RS07645|lukF	CYLY01000002	77.03	962	191	25	7	953	66253	67199	2e-149	525	1280_4487.contig
USA300HOU_RS07650|lukS	CYLY01000006	100	939	0	0	1	939	135434	134496	0	1735	1280_4487.contig
USA300HOU_RS07650|lukS	CYLY01000002	75.74	643	138	16	169	803	63973	64605	6e-84	307	1280_4487.contig
USA300HOU_RS07645|lukF	QHCN01000001	82.41	972	165	6	7	975	2177533	2176565	0	843	1280_16761.fna
USA300HOU_RS07645|lukF	QHCN01000001	77.03	962	191	25	7	953	2769967	2770913	2e-149	525	1280_16761.fna
USA300HOU_RS07650|lukS	QHCN01000001	75.74	643	138	16	169	803	2767686	2768318	7e-84	307	1280_16761.fna
USA300HOU_RS07645|lukF	BDYZ01000004	82.2	972	167	6	7	975	83823	84791	0	832	1280_17840.fna
USA300HOU_RS07645|lukF	BDYZ01000002	77.03	962	191	26	7	953	798435	797489	2e-149	525	1280_17840.fna
USA300HOU_RS07650|lukS	BDYZ01000002	75.74	643	138	16	169	803	800716	800084	6e-84	307	1280_17840.fna
USA300HOU_RS07645|lukF	NDMD01000044	82.3	972	166	6	7	975	18387	17419	0	837	1280_12319.fna
USA300HOU_RS07645|lukF	NDMD01000052	77.03	962	191	26	7	953	79145	78199	2e-149	525	1280_12319.fna
USA300HOU_RS07650|lukS	NDMD01000052	75.74	643	138	16	169	803	81425	80793	6e-84	307	1280_12319.fna
USA300HOU_RS07645|lukF	BCPX01000005	82.1	972	168	6	7	975	83263	82295	0	826	1223492_3.fna
USA300HOU_RS07645|lukF	BCPX01000003	76.92	962	192	25	7	953	225731	226677	7e-148	520	1223492_3.fna
USA300HOU_RS07650|lukS	BCPX01000003	75.74	643	138	16	169	803	223450	224082	6e-84	307	1223492_3.fna
USA300HOU_RS07645|lukF	PDIU01000004	82.3	972	166	6	7	975	17985	17017	0	837	1280_14675.fna
USA300HOU_RS07645|lukF	PDIU01000002	77.03	962	191	25	7	953	246996	247942	2e-149	525	1280_14675.fna
USA300HOU_RS07650|lukS	PDIU01000002	75.74	643	138	16	169	803	244715	245347	6e-84	307	1280_14675.fna
USA300HOU_RS07645|lukF	LFVE01000004	100	984	0	0	1	984	45709	46692	0	1818	46170_169.fna
USA300HOU_RS07645|lukF	LFVE01000017	82.3	972	166	6	7	975	37316	38284	0	837	46170_169.fna
USA300HOU_RS07645|lukF	LFVE01000003	77.03	962	191	26	7	953	32883	31937	2e-149	525	46170_169.fna
USA300HOU_RS07650|lukS	LFVE01000004	100	939	0	0	1	939	44775	45713	0	1735	46170_169.fna
USA300HOU_RS07650|lukS	LFVE01000003	75.74	643	138	16	169	803	35163	34531	6e-84	307	46170_169.fna
USA300HOU_RS07645|lukF	1280.4929.con.0018	100	984	0	0	1	984	25001	25984	0	1818	1280_4929.fna
USA300HOU_RS07645|lukF	1280.4929.con.0049	82.3	972	166	6	7	975	4604	5572	0	837	1280_4929.fna
USA300HOU_RS07645|lukF	1280.4929.con.0002	77.03	962	191	26	7	953	79600	78654	2e-149	525	1280_4929.fna
USA300HOU_RS07650|lukS	1280.4929.con.0018	100	939	0	0	1	939	24067	25005	0	1735	1280_4929.fna
USA300HOU_RS07650|lukS	1280.4929.con.0002	75.74	643	138	16	169	803	81880	81248	6e-84	307	1280_4929.fna
USA300HOU_RS07645|lukF	LGWH01000003	100	984	0	0	1	984	104203	105186	0	1818	1280_13715.fna
USA300HOU_RS07645|lukF	LGWH01000020	82.3	972	166	6	7	975	37241	38209	0	837	1280_13715.fna
USA300HOU_RS07645|lukF	LGWH01000001	77.03	962	191	25	7	953	225317	226263	2e-149	525	1280_13715.fna
USA300HOU_RS07650|lukS	LGWH01000003	100	939	0	0	1	939	103269	104207	0	1735	1280_13715.fna
USA300HOU_RS07650|lukS	LGWH01000001	75.74	643	138	16	169	803	223037	223669	6e-84	307	1280_13715.fna
USA300HOU_RS07645|lukF	NDQD01000029	100	984	0	0	1	984	13768	12785	0	1818	1280_12423.fna
USA300HOU_RS07645|lukF	NDQD01000041	82.3	972	166	6	7	975	18394	17426	0	837	1280_12423.fna
USA300HOU_RS07645|lukF	NDQD01000066	77.03	962	191	26	7	953	79143	78197	2e-149	525	1280_12423.fna
USA300HOU_RS07650|lukS	NDQD01000029	100	939	0	0	1	939	14702	13764	0	1735	1280_12423.fna
USA300HOU_RS07650|lukS	NDQD01000066	75.74	643	138	16	169	803	81423	80791	6e-84	307	1280_12423.fna
USA300HOU_RS07645|lukF	JACGYR010000014	82.3	972	166	6	7	975	39968	40936	0	837	1280_28633.fna
USA300HOU_RS07645|lukF	JACGYR010000003	77.03	962	191	25	7	953	247210	248156	2e-149	525	1280_28633.fna
USA300HOU_RS07650|lukS	JACGYR010000003	75.74	643	138	16	169	803	244929	245561	6e-84	307	1280_28633.fna
USA300HOU_RS07645|lukF	JEOZ01000003	82.3	972	166	6	7	975	1057284	1056316	0	837	1410910_3.fna
USA300HOU_RS07645|lukF	JEOZ01000004	77.03	962	191	25	7	953	251969	252915	2e-149	525	1410910_3.fna
USA300HOU_RS07650|lukS	JEOZ01000004	75.74	643	138	16	169	803	249689	250321	6e-84	307	1410910_3.fna
USA300HOU_RS07645|lukF	CSJN01000001	100	984	0	0	1	984	91016	90033	0	1818	1280_3808.contig
USA300HOU_RS07645|lukF	CSJN01000027	82.3	972	166	6	7	975	18354	17386	0	837	1280_3808.contig
USA300HOU_RS07645|lukF	CSJN01000007	77.03	962	191	26	7	953	35858	34912	2e-149	525	1280_3808.contig
USA300HOU_RS07650|lukS	CSJN01000001	100	939	0	0	1	939	91950	91012	0	1735	1280_3808.contig
USA300HOU_RS07650|lukS	CSJN01000007	75.74	643	138	16	169	803	38138	37506	6e-84	307	1280_3808.contig
USA300HOU_RS07645|lukF	JEVH01000001	100	984	0	0	1	984	669008	668025	0	1818	1417160_3.fna
USA300HOU_RS07645|lukF	JEVH01000004	82.3	972	166	6	7	975	357266	356298	0	837	1417160_3.fna
USA300HOU_RS07645|lukF	JEVH01000002	77.03	962	191	25	7	953	365243	366189	2e-149	525	1417160_3.fna
USA300HOU_RS07650|lukS	JEVH01000001	100	939	0	0	1	939	669942	669004	0	1735	1417160_3.fna
USA300HOU_RS07650|lukS	JEVH01000002	75.74	643	138	16	169	803	362963	363595	7e-84	307	1417160_3.fna
USA300HOU_RS07645|lukF	1280.8658.con.0022	82.1	972	168	6	7	975	14491	13523	0	826	1280_8658.fna
USA300HOU_RS07645|lukF	1280.8658.con.0002	77.03	962	191	26	7	953	449770	448824	2e-149	525	1280_8658.fna
USA300HOU_RS07650|lukS	1280.8658.con.0002	75.74	643	138	16	169	803	452051	451419	6e-84	307	1280_8658.fna
USA300HOU_RS07645|lukF	JGGW01000001	100	984	0	0	1	984	669171	668188	0	1818	1418328_3.fna
USA300HOU_RS07645|lukF	JGGW01000008	82.3	972	166	6	7	975	46136	45168	0	837	1418328_3.fna
USA300HOU_RS07645|lukF	JGGW01000002	77.03	962	191	25	7	953	65784	66730	2e-149	525	1418328_3.fna
USA300HOU_RS07650|lukS	JGGW01000001	100	939	0	0	1	939	670105	669167	0	1735	1418328_3.fna
USA300HOU_RS07650|lukS	JGGW01000002	75.74	643	138	16	169	803	63504	64136	6e-84	307	1418328_3.fna
USA300HOU_RS07645|lukF	JGGM01000001	100	984	0	0	1	984	460498	459515	0	1818	1418295_3.fna
USA300HOU_RS07645|lukF	JGGM01000004	82.3	972	166	6	7	975	63734	62766	0	837	1418295_3.fna
USA300HOU_RS07645|lukF	JGGM01000002	77.03	962	191	25	7	953	363351	364297	2e-149	525	1418295_3.fna
USA300HOU_RS07650|lukS	JGGM01000001	100	939	0	0	1	939	461432	460494	0	1735	1418295_3.fna
USA300HOU_RS07650|lukS	JGGM01000002	75.74	643	138	16	169	803	361071	361703	6e-84	307	1418295_3.fna
USA300HOU_RS07645|lukF	CP040619	82.3	972	166	6	7	975	1912769	1911801	0	837	1280_21137.fna
USA300HOU_RS07645|lukF	CP040619	77.03	962	191	25	7	953	2542939	2543885	2e-149	525	1280_21137.fna
USA300HOU_RS07650|lukS	CP040619	75.74	643	138	16	169	803	2540658	2541290	7e-84	307	1280_21137.fna
USA300HOU_RS07645|lukF	CSBT01000002	100	984	0	0	1	984	242896	243879	0	1818	1280_3906.contig
USA300HOU_RS07645|lukF	CSBT01000009	82.3	972	166	6	7	975	18411	17443	0	837	1280_3906.contig
USA300HOU_RS07645|lukF	CSBT01000003	77.03	962	191	26	7	953	79195	78249	2e-149	525	1280_3906.contig
USA300HOU_RS07650|lukS	CSBT01000002	100	939	0	0	1	939	241962	242900	0	1735	1280_3906.contig
USA300HOU_RS07650|lukS	CSBT01000003	75.74	643	138	16	169	803	81475	80843	6e-84	307	1280_3906.contig
USA300HOU_RS07645|lukF	JEED01000001	100	984	0	0	1	984	946978	945995	0	1818	1412649_3.fna
USA300HOU_RS07645|lukF	JEED01000001	82.3	972	166	6	7	975	1342870	1341902	0	837	1412649_3.fna
USA300HOU_RS07645|lukF	JEED01000003	77.03	962	191	25	7	953	253145	254091	2e-149	525	1412649_3.fna
USA300HOU_RS07650|lukS	JEED01000001	100	939	0	0	1	939	947912	946974	0	1735	1412649_3.fna
USA300HOU_RS07650|lukS	JEED01000003	75.74	643	138	16	169	803	250865	251497	7e-84	307	1412649_3.fna
USA300HOU_RS07645|lukF	JDJW01000001	99.9	984	1	0	1	984	685538	684555	0	1812	1410777_3.fna
USA300HOU_RS07645|lukF	JDJW01000011	82.3	972	166	6	7	975	19491	18523	0	837	1410777_3.fna
USA300HOU_RS07645|lukF	JDJW01000003	77.03	962	191	25	7	953	155603	156549	2e-149	525	1410777_3.fna
USA300HOU_RS07650|lukS	JDJW01000001	100	939	0	0	1	939	686472	685534	0	1735	1410777_3.fna
USA300HOU_RS07650|lukS	JDJW01000003	75.74	643	138	16	169	803	153323	153955	7e-84	307	1410777_3.fna
USA300HOU_RS07645|lukF	BDYG01000005	82.2	972	167	6	7	975	39968	40936	0	832	1280_17821.fna
USA300HOU_RS07645|lukF	BDYG01000002	77.03	962	191	25	7	953	247064	248010	2e-149	525	1280_17821.fna
USA300HOU_RS07650|lukS	BDYG01000002	75.74	643	138	16	169	803	244783	245415	6e-84	307	1280_17821.fna
USA300HOU_RS07645|lukF	1280.8291.con.0020	82.2	972	167	6	7	975	15118	14150	0	832	1280_8291.fna
USA300HOU_RS07645|lukF	1280.8291.con.0008	77.03	962	191	25	7	953	69066	70012	2e-149	525	1280_8291.fna
USA300HOU_RS07650|lukS	1280.8291.con.0008	75.74	643	138	16	169	803	66785	67417	6e-84	307	1280_8291.fna
USA300HOU_RS07645|lukF	JDHA01000012	82.3	972	166	6	7	975	19491	18523	0	837	1410689_3.fna
USA300HOU_RS07645|lukF	JDHA01000002	77.03	962	191	25	7	953	225778	226724	2e-149	525	1410689_3.fna
USA300HOU_RS07650|lukS	JDHA01000002	75.74	643	138	16	169	803	223498	224130	6e-84	307	1410689_3.fna
USA300HOU_RS07645|lukF	LGWF01000024	100	984	0	0	1	984	12004	12987	0	1818	1280_13706.fna
USA300HOU_RS07645|lukF	LGWF01000017	82.3	972	166	6	7	975	6170	7138	0	837	1280_13706.fna
USA300HOU_RS07645|lukF	LGWF01000008	77.03	962	191	26	7	953	79573	78627	2e-149	525	1280_13706.fna
USA300HOU_RS07650|lukS	LGWF01000024	100	939	0	0	1	939	11070	12008	0	1735	1280_13706.fna
USA300HOU_RS07650|lukS	LGWF01000008	75.74	643	138	16	169	803	81853	81221	6e-84	307	1280_13706.fna
USA300HOU_RS07645|lukF	JGMP01000004	100	984	0	0	1	984	117468	116485	0	1818	1418414_3.fna
USA300HOU_RS07645|lukF	JGMP01000010	82.3	972	166	6	7	975	44600	43632	0	837	1418414_3.fna
USA300HOU_RS07645|lukF	JGMP01000002	77.03	962	191	25	7	953	252535	253481	2e-149	525	1418414_3.fna
USA300HOU_RS07650|lukS	JGMP01000004	100	939	0	0	1	939	118402	117464	0	1735	1418414_3.fna
USA300HOU_RS07650|lukS	JGMP01000002	75.74	643	138	16	169	803	250255	250887	6e-84	307	1418414_3.fna
USA300HOU_RS07645|lukF	CYOL01000012	82.3	972	166	6	7	975	37334	38302	0	837	1280_4381.contig
USA300HOU_RS07645|lukF	CYOL01000002	77.03	962	191	26	7	953	461856	460910	2e-149	525	1280_4381.contig
USA300HOU_RS07650|lukS	CYOL01000002	75.74	643	138	16	169	803	464137	463505	6e-84	307	1280_4381.contig
USA300HOU_RS07645|lukF	CFOU01000002	100	984	0	0	1	984	242895	243878	0	1818	1280_4692.contig
USA300HOU_RS07645|lukF	CFOU01000011	82.3	972	166	6	7	975	37303	38271	0	837	1280_4692.contig
USA300HOU_RS07645|lukF	CFOU01000007	77.03	962	191	25	7	953	66153	67099	2e-149	525	1280_4692.contig
USA300HOU_RS07650|lukS	CFOU01000002	100	939	0	0	1	939	241961	242899	0	1735	1280_4692.contig
USA300HOU_RS07650|lukS	CFOU01000007	75.74	643	138	16	169	803	63873	64505	6e-84	307	1280_4692.contig
USA300HOU_RS07645|lukF	CP014423	100	984	0	0	1	984	1604689	1603706	0	1818	1280_11683.fna
USA300HOU_RS07645|lukF	CP014423	82.3	972	166	6	7	975	2003919	2002951	0	837	1280_11683.fna
USA300HOU_RS07645|lukF	CP014423	77.03	962	191	25	7	953	2591703	2592649	2e-149	525	1280_11683.fna
USA300HOU_RS07650|lukS	CP014423	100	939	0	0	1	939	1605623	1604685	0	1735	1280_11683.fna
USA300HOU_RS07650|lukS	CP014423	75.74	643	138	16	169	803	2589423	2590055	7e-84	307	1280_11683.fna
USA300HOU_RS07645|lukF	1280.25145.con.0014	82.3	972	166	6	7	975	37223	38191	0	837	1280_25145.fna
USA300HOU_RS07645|lukF	1280.25145.con.0003	77.03	962	191	25	7	953	225234	226180	2e-149	525	1280_25145.fna
USA300HOU_RS07650|lukS	1280.25145.con.0003	75.74	643	138	16	169	803	222953	223585	6e-84	307	1280_25145.fna
USA300HOU_RS07645|lukF	JYAE01000001	82.1	972	168	6	7	975	1953498	1954466	0	826	1280_4826.fna
USA300HOU_RS07645|lukF	JYAE01000001	77.03	962	191	26	7	953	1365536	1364590	2e-149	525	1280_4826.fna
USA300HOU_RS07650|lukS	JYAE01000001	75.74	643	138	16	169	803	1367817	1367185	6e-84	307	1280_4826.fna
USA300HOU_RS07645|lukF	CVJS01000002	100	984	0	0	1	984	103463	102480	0	1818	1280_4779.contig
USA300HOU_RS07645|lukF	CVJS01000007	82.3	972	166	6	7	975	38431	39399	0	837	1280_4779.contig
USA300HOU_RS07645|lukF	CVJS01000004	77.03	962	191	26	7	953	79319	78373	2e-149	525	1280_4779.contig
USA300HOU_RS07650|lukS	CVJS01000002	100	939	0	0	1	939	104397	103459	0	1735	1280_4779.contig
USA300HOU_RS07650|lukS	CVJS01000004	75.74	643	138	16	169	803	81599	80967	6e-84	307	1280_4779.contig
USA300HOU_RS07645|lukF	CSEZ01000003	100	984	0	0	1	984	103460	102477	0	1818	1280_3937.contig
USA300HOU_RS07645|lukF	CSEZ01000010	82.3	972	166	6	7	975	18413	17445	0	837	1280_3937.contig
USA300HOU_RS07645|lukF	CSEZ01000004	77.03	962	191	26	7	953	79315	78369	2e-149	525	1280_3937.contig
USA300HOU_RS07650|lukS	CSEZ01000003	100	939	0	0	1	939	104394	103456	0	1735	1280_3937.contig
USA300HOU_RS07650|lukS	CSEZ01000004	75.74	643	138	16	169	803	81595	80963	6e-84	307	1280_3937.contig
USA300HOU_RS07645|lukF	CSDG01000003	100	984	0	0	1	984	103475	102492	0	1818	1280_3877.contig
USA300HOU_RS07645|lukF	CSDG01000010	82.3	972	166	6	7	975	37319	38287	0	837	1280_3877.contig
USA300HOU_RS07645|lukF	CSDG01000007	77.03	962	191	25	7	953	66600	67546	2e-149	525	1280_3877.contig
USA300HOU_RS07650|lukS	CSDG01000003	100	939	0	0	1	939	104409	103471	0	1735	1280_3877.contig
USA300HOU_RS07650|lukS	CSDG01000007	75.74	643	138	16	169	803	64320	64952	6e-84	307	1280_3877.contig
USA300HOU_RS07645|lukF	BDVL01000006	82.3	972	166	6	7	975	37338	38306	0	837	1280_17749.fna
USA300HOU_RS07645|lukF	BDVL01000001	77.03	962	191	25	7	953	246980	247926	2e-149	525	1280_17749.fna
USA300HOU_RS07650|lukS	BDVL01000001	75.74	643	138	16	169	803	244699	245331	6e-84	307	1280_17749.fna
USA300HOU_RS07645|lukF	JABFLS010000001	100	984	0	0	1	984	376581	377564	0	1818	1280_27461.fna
USA300HOU_RS07645|lukF	JABFLS010000005	82.3	972	166	6	7	975	37348	38316	0	837	1280_27461.fna
USA300HOU_RS07645|lukF	JABFLS010000002	77.03	962	191	26	7	953	781902	780956	2e-149	525	1280_27461.fna
USA300HOU_RS07650|lukS	JABFLS010000001	100	939	0	0	1	939	375647	376585	0	1735	1280_27461.fna
USA300HOU_RS07650|lukS	JABFLS010000002	75.74	643	138	16	169	803	784182	783550	6e-84	307	1280_27461.fna
USA300HOU_RS07645|lukF	CYOY01000003	100	984	0	0	1	984	242934	243917	0	1818	1280_4430.contig
USA300HOU_RS07645|lukF	CYOY01000008	82.3	972	166	6	7	975	18392	17424	0	837	1280_4430.contig
USA300HOU_RS07645|lukF	CYOY01000004	77.03	962	191	25	7	953	247061	248007	2e-149	525	1280_4430.contig
USA300HOU_RS07650|lukS	CYOY01000003	100	939	0	0	1	939	242000	242938	0	1735	1280_4430.contig
USA300HOU_RS07650|lukS	CYOY01000004	75.74	643	138	16	169	803	244781	245413	6e-84	307	1280_4430.contig
USA300HOU_RS07645|lukF	CGEC01000003	100	984	0	0	1	984	103452	102469	0	1818	1280_4728.contig
USA300HOU_RS07645|lukF	CGEC01000009	82.3	972	166	6	7	975	18417	17449	0	837	1280_4728.contig
USA300HOU_RS07645|lukF	CGEC01000002	77.03	962	191	26	7	953	486853	485907	2e-149	525	1280_4728.contig
USA300HOU_RS07650|lukS	CGEC01000003	100	939	0	0	1	939	104386	103448	0	1735	1280_4728.contig
USA300HOU_RS07650|lukS	CGEC01000002	75.74	643	138	16	169	803	489133	488501	6e-84	307	1280_4728.contig
USA300HOU_RS07645|lukF	CFPN01000002	100	984	0	0	1	984	242772	243755	0	1818	1280_4694.contig
USA300HOU_RS07645|lukF	CFPN01000009	82.3	972	166	6	7	975	18450	17482	0	837	1280_4694.contig
USA300HOU_RS07645|lukF	CFPN01000003	77.03	962	191	25	7	953	225203	226149	2e-149	525	1280_4694.contig
USA300HOU_RS07650|lukS	CFPN01000002	100	939	0	0	1	939	241838	242776	0	1735	1280_4694.contig
USA300HOU_RS07650|lukS	CFPN01000003	75.74	643	138	16	169	803	222923	223555	6e-84	307	1280_4694.contig
USA300HOU_RS07645|lukF	CP010297	100	984	0	0	1	984	1547150	1546167	0	1818	1280_2217.fna
USA300HOU_RS07645|lukF	CP010297	82.3	972	166	6	7	975	1956295	1955327	0	837	1280_2217.fna
USA300HOU_RS07645|lukF	CP010297	77.03	962	191	25	7	953	2544572	2545518	2e-149	525	1280_2217.fna
USA300HOU_RS07650|lukS	CP010297	100	939	0	0	1	939	1548084	1547146	0	1735	1280_2217.fna
USA300HOU_RS07650|lukS	CP010297	75.74	643	138	16	169	803	2542292	2542924	6e-84	307	1280_2217.fna
USA300HOU_RS07645|lukF	JABFLK010000004	100	984	0	0	1	984	103488	102505	0	1818	1280_27467.fna
USA300HOU_RS07645|lukF	JABFLK010000007	82.2	972	167	6	7	975	37347	38315	0	832	1280_27467.fna
USA300HOU_RS07645|lukF	JABFLK010000002	77.03	962	191	26	7	953	79985	79039	2e-149	525	1280_27467.fna
USA300HOU_RS07650|lukS	JABFLK010000004	100	939	0	0	1	939	104422	103484	0	1735	1280_27467.fna
USA300HOU_RS07650|lukS	JABFLK010000002	75.74	643	138	16	169	803	82265	81633	6e-84	307	1280_27467.fna
USA300HOU_RS07645|lukF	JDOA01000013	82.3	972	166	6	7	975	348663	347695	0	837	1410911_3.fna
USA300HOU_RS07645|lukF	JDOA01000014	77.03	962	191	25	7	953	155601	156547	2e-149	525	1410911_3.fna
USA300HOU_RS07650|lukS	JDOA01000014	75.74	643	138	16	169	803	153321	153953	6e-84	307	1410911_3.fna
USA300HOU_RS07645|lukF	CYKO01000003	100	984	0	0	1	984	103449	102466	0	1818	1280_4359.contig
USA300HOU_RS07645|lukF	CYKO01000010	82.3	972	166	6	7	975	18425	17457	0	837	1280_4359.contig
USA300HOU_RS07645|lukF	CYKO01000001	77.03	962	191	26	7	953	763203	762257	2e-149	525	1280_4359.contig
USA300HOU_RS07650|lukS	CYKO01000003	100	939	0	0	1	939	104383	103445	0	1735	1280_4359.contig
USA300HOU_RS07650|lukS	CYKO01000001	75.74	643	138	16	169	803	765483	764851	6e-84	307	1280_4359.contig
USA300HOU_RS07645|lukF	JGLO01000007	82.3	972	166	6	7	975	184514	183546	0	837	1418376_3.fna
USA300HOU_RS07645|lukF	JGLO01000002	77.03	962	191	25	7	953	225714	226660	2e-149	525	1418376_3.fna
USA300HOU_RS07650|lukS	JGLO01000002	75.58	643	139	16	169	803	223433	224065	3e-82	302	1418376_3.fna
USA300HOU_RS07645|lukF	CYLB01000007	82.3	972	166	6	7	975	19527	18559	0	837	1280_4432.contig
USA300HOU_RS07645|lukF	CYLB01000001	77.03	962	191	26	7	953	730507	729561	2e-149	525	1280_4432.contig
USA300HOU_RS07650|lukS	CYLB01000001	75.74	643	138	16	169	803	732788	732156	6e-84	307	1280_4432.contig
USA300HOU_RS07645|lukF	JESB01000004	82.3	972	166	6	7	975	46291	45323	0	837	1417126_3.fna
USA300HOU_RS07645|lukF	JESB01000003	77.03	962	191	25	7	953	66488	67434	2e-149	525	1417126_3.fna
USA300HOU_RS07650|lukS	JESB01000003	75.74	643	138	16	169	803	64208	64840	6e-84	307	1417126_3.fna
USA300HOU_RS07645|lukF	LAMS01000014	100	984	0	0	1	984	104258	105241	0	1818	1280_3602.fna
USA300HOU_RS07645|lukF	LAMS01000027	82.3	972	166	6	7	975	37241	38209	0	837	1280_3602.fna
USA300HOU_RS07645|lukF	LAMS01000017	77.03	962	191	25	7	953	225350	226296	2e-149	525	1280_3602.fna
USA300HOU_RS07650|lukS	LAMS01000014	100	939	0	0	1	939	103324	104262	0	1735	1280_3602.fna
USA300HOU_RS07650|lukS	LAMS01000017	75.74	643	138	16	169	803	223070	223702	6e-84	307	1280_3602.fna
USA300HOU_RS07645|lukF	JACOCV010000003	100	984	0	0	1	984	123016	122033	0	1818	1280_30805.fna
USA300HOU_RS07645|lukF	JACOCV010000009	82.3	972	166	6	7	975	18438	17470	0	837	1280_30805.fna
[truncated: 6,941 more rows]

## Sheet: mecA
# Automatic mecA detection and mecA type prediction
strain	resistance	mecA	no_of_SCCmec	single_gene_prediction	whole_cassette_prediction	wcp_pident	agreement
1280_21783	MRSA	TRUE	1	SCCmec_type_IVa(2B)	SCCmec_type_IVa(2B)	89.06	TRUE
1412728_3	MRSA	TRUE	1	SCCmec_type_IVa(2B)	SCCmec_type_IVa(2B)	88.75	TRUE
1410812_3	MRSA	TRUE	1	SCCmec_type_IVa(2B)	SCCmec_type_IVa(2B)	88.78	TRUE
1280_4373	MSSA	FALSE	0			0	TRUE
1280_28360	MRSA	TRUE	1	SCCmec_type_IVc(2B)	SCCmec_type_IVc(2B)	93.84	TRUE
1280_3856	MRSA	TRUE	1	SCCmec_type_IVa(2B)	SCCmec_type_IVa(2B)	91.32	TRUE
1280_17965	MSSA	FALSE	0			0	TRUE
1280_17934	MSSA	FALSE	0			0	TRUE
1280_4456	MRSA	TRUE	1	SCCmec_type_IVa(2B)	SCCmec_type_IVa(2B)	88.9	TRUE
1412786_3	MRSA	TRUE	1	SCCmec_type_IVa(2B)	SCCmec_type_IVa(2B)	86.05	TRUE
46170_343	MRSA	TRUE	1	SCCmec_type_IVa(2B)	SCCmec_type_IVa(2B)	88.88	TRUE
1418354_3	MRSA	TRUE	1	SCCmec_type_IVa(2B)	SCCmec_type_IVa(2B)	88.38	TRUE
1410855_3	MRSA	TRUE	1	SCCmec_type_IVa(2B)	SCCmec_type_IVa(2B)	88.95	TRUE
1280_11644	MSSA	FALSE	0			0	TRUE
1280_27502	MRSA	TRUE	1	SCCmec_type_IVa(2B)	SCCmec_type_IVa(2B)	88.96	TRUE
1280_12358	MRSA	TRUE	1	SCCmec_type_IVa(2B)	SCCmec_type_IVa(2B)	88.59	TRUE
1280_12383	MRSA	TRUE	1	SCCmec_type_IVa(2B)	SCCmec_type_IVa(2B)	88.86	TRUE
1409370_3	MRSA	TRUE	1	SCCmec_type_IVa(2B)	SCCmec_type_IVa(2B)	88.59	TRUE
1418301_3	MRSA	TRUE	1	SCCmec_type_IVa(2B)	SCCmec_type_IVa(2B)	88.33	TRUE
1280_18092	MSSA	FALSE	0			0	TRUE
1280_4516	MSSA	FALSE	0			0	TRUE
1409444_3	MRSA	TRUE	1	SCCmec_type_IVa(2B)	SCCmec_type_IVa(2B)	89	TRUE
1280_5309	MRSA	TRUE	Multiple	SCCmec_type_IV(2B)	SCCmec_type_II(2A)	52.26	FALSE
1418411_3	MRSA	TRUE	1	SCCmec_type_IVa(2B)	SCCmec_type_IVa(2B)	88.56	TRUE
1409583_3	MRSA	TRUE	1	SCCmec_type_IVa(2B)	SCCmec_type_IVa(2B)	88.68	TRUE
1280_3857	MRSA	TRUE	1	SCCmec_type_IVa(2B)	SCCmec_type_IVa(2B)	87.81	TRUE
1280_11645	MSSA	FALSE	0			0	TRUE
1409717_3	MRSA	TRUE	1	SCCmec_type_IVa(2B)	SCCmec_type_IVa(2B)	88.21	TRUE
46170_351	MRSA	TRUE	1	SCCmec_type_IVa(2B)	SCCmec_type_IVa(2B)	88.76	TRUE
1417064_3	MRSA	TRUE	1	SCCmec_type_IVa(2B)	SCCmec_type_IVa(2B)	88.69	TRUE
1280_17815	MSSA	FALSE	0			0	TRUE
1410865_3	MRSA	TRUE	1	SCCmec_type_IVa(2B)	SCCmec_type_IVa(2B)	88.93	TRUE
1280_9429	MSSA	FALSE	0			0	TRUE
1280_24318	MSSA	FALSE	0			0	TRUE
1412782_3	MRSA	TRUE	Multiple	SCCmec_type_IVg(2B)	SCCmec_type_IVc(2B)	79.38	FALSE
1280_27462	MRSA	TRUE	1	SCCmec_type_IVa(2B)	SCCmec_type_IVa(2B)	88.78	TRUE
1280_4021	MRSA	TRUE	1	SCCmec_type_IVa(2B)	SCCmec_type_IVa(2B)	89.04	TRUE
1280_4681	MRSA	TRUE	1	SCCmec_type_IVa(2B)	SCCmec_type_IVa(2B)	87.93	TRUE
1280_11668	MSSA	FALSE	0			0	TRUE
1398006_3	MSSA	FALSE	0			0	TRUE
1409736_3	MRSA	TRUE	1	SCCmec_type_IVa(2B)	SCCmec_type_IVa(2B)	88.62	TRUE
1280_4974	MSSA	FALSE	0			0	TRUE
1417182_3	MRSA	TRUE	1	SCCmec_type_IVa(2B)	SCCmec_type_IVa(2B)	88.47	TRUE
1280_4452	MSSA	FALSE	0			0	TRUE
1280_25939	MSSA	FALSE	0			0	TRUE
1409554_3	MRSA	TRUE	1	SCCmec_type_IVa(2B)	SCCmec_type_IVa(2B)	88.85	TRUE
1409428_3	MRSA	TRUE	1	SCCmec_type_IVa(2B)	SCCmec_type_IVa(2B)	88.84	TRUE
1280_27460	MRSA	TRUE	1	SCCmec_type_IVa(2B)	SCCmec_type_IVa(2B)	89.06	TRUE
1421854_3	MRSA	TRUE	1	SCCmec_type_IVa(2B)	SCCmec_type_IVa(2B)	88.8	TRUE
1280_16274	MRSA	TRUE	1	SCCmec_type_IVc(2B)	SCCmec_type_IVc(2B)	93.76	TRUE
1417057_3	MRSA	TRUE	1	SCCmec_type_IVa(2B)	SCCmec_type_IVa(2B)	88.82	TRUE
1409560_3	MRSA	TRUE	1	SCCmec_type_IVa(2B)	SCCmec_type_IVa(2B)	88.48	TRUE
1280_4388	MRSA	TRUE	1	SCCmec_type_IVa(2B)	SCCmec_type_IVa(2B)	88.9	TRUE
1280_12334	MRSA	TRUE	1	SCCmec_type_IVa(2B)	SCCmec_type_IVa(2B)	88.8	TRUE
1412766_3	MRSA	TRUE	1	SCCmec_type_IVa(2B)	SCCmec_type_IVa(2B)	89	TRUE
1156999_3	MSSA	FALSE	0			0	TRUE
1421846_3	MRSA	TRUE	1	SCCmec_type_IVa(2B)	SCCmec_type_IVa(2B)	88.75	TRUE
1418422_3	MRSA	TRUE	1	SCCmec_type_IVa(2B)	SCCmec_type_IVa(2B)	88.03	TRUE
1280_11686	MRSA	TRUE	1	SCCmec_type_IVa(2B)	SCCmec_type_IVa(2B)	89	TRUE
1280_3973	MRSA	TRUE	1	SCCmec_type_IVa(2B)	SCCmec_type_IVa(2B)	87.18	TRUE
1280_3988	MRSA	TRUE	1	SCCmec_type_IVa(2B)	SCCmec_type_IVa(2B)	88.69	TRUE
1280_17710	MSSA	FALSE	0			0	TRUE
1280_3962	MRSA	TRUE	1	SCCmec_type_IVb(2B)	SCCmec_type_IVb(2B)	99.4	TRUE
1280_17985	MRSA	TRUE	1	SCCmec_type_IVc(2B)	SCCmec_type_IVc(2B)	93.7	TRUE
1280_17875	MSSA	FALSE	0			0	TRUE
904799_3	MRSA	TRUE	1	SCCmec_type_IVa(2B)	SCCmec_type_IVa(2B)	88.99	TRUE
1280_4547	MRSA	TRUE	1	SCCmec_type_IVa(2B)	SCCmec_type_IVa(2B)	88.64	TRUE
1280_16398	MSSA	FALSE	0			0	TRUE
867914_5	MRSA	TRUE	1	SCCmec_type_IVa(2B)	SCCmec_type_IVa(2B)	89.03	TRUE
1280_4499	MRSA	TRUE	1	SCCmec_type_IVa(2B)	SCCmec_type_IVa(2B)	88.88	TRUE
1280_25833	MRSA	TRUE	1	SCCmec_type_IVa(2B)	SCCmec_type_IVa(2B)	86.6	TRUE
1409586_3	MRSA	TRUE	1	SCCmec_type_IVa(2B)	SCCmec_type_IVa(2B)	88.62	TRUE
1410707_3	MRSA	TRUE	1	SCCmec_type_IVa(2B)	SCCmec_type_IVa(2B)	88.88	TRUE
1280_16915	MRSA	TRUE	1	SCCmec_type_VI(4B)	SCCmec_type_VI(4B)	95.86	TRUE
1739323_3	MRSA	TRUE	1	SCCmec_type_IVa(2B)	SCCmec_type_IVa(2B)	88.91	TRUE
1421859_3	MRSA	TRUE	1	SCCmec_type_IVa(2B)	SCCmec_type_IVa(2B)	88.61	TRUE
1411545_3	MRSA	TRUE	1	SCCmec_type_IVa(2B)	SCCmec_type_IVa(2B)	88.52	TRUE
1409513_3	MRSA	TRUE	1	SCCmec_type_IVa(2B)	SCCmec_type_IVa(2B)	89.06	TRUE
1280_21636	MSSA	FALSE	0			0	TRUE
1280_12366	MRSA	TRUE	1	SCCmec_type_IVa(2B)	SCCmec_type_IVa(2B)	88.56	TRUE
1417048_3	MRSA	TRUE	1	SCCmec_type_IVa(2B)	SCCmec_type_IVa(2B)	88.99	TRUE
1409401_3	MRSA	TRUE	1	SCCmec_type_IVa(2B)	SCCmec_type_IVa(2B)	86.84	TRUE
1410695_3	MRSA	TRUE	1	SCCmec_type_IVa(2B)	SCCmec_type_IVa(2B)	88.86	TRUE
1280_4748	MRSA	TRUE	1	SCCmec_type_IVa(2B)	SCCmec_type_IVa(2B)	86.99	TRUE
1409429_3	MRSA	TRUE	1	SCCmec_type_IVa(2B)	SCCmec_type_IVa(2B)	88.88	TRUE
1280_4749	MRSA	TRUE	1	SCCmec_type_IVa(2B)	SCCmec_type_IVa(2B)	88.93	TRUE
1280_18631	MRSA	TRUE	1	SCCmec_type_IVa(2B)	SCCmec_type_IVa(2B)	88.99	TRUE
1412685_3	MRSA	TRUE	1	SCCmec_type_IVa(2B)	SCCmec_type_IVa(2B)	88.48	TRUE
1280_4385	MRSA	TRUE	1	SCCmec_type_IVa(2B)	SCCmec_type_IVa(2B)	88.95	TRUE
1417105_3	MRSA	TRUE	1	SCCmec_type_IVa(2B)	SCCmec_type_IVa(2B)	88.72	TRUE
1280_3802	MSSA	FALSE	0			0	TRUE
1280_4737	MRSA	TRUE	1	SCCmec_type_IVa(2B)	SCCmec_type_IVa(2B)	87.02	TRUE
1280_18044	MRSA	TRUE	1	SCCmec_type_VI(4B)	SCCmec_type_VI(4B)	95.93	TRUE
1410737_3	MRSA	TRUE	Multiple	SCCmec_type_IVg(2B)	SCCmec_type_IVc(2B)	78.7	FALSE
1421898_3	MRSA	TRUE	1	SCCmec_type_IVa(2B)	SCCmec_type_IVa(2B)	86.97	TRUE
1280_27469	MRSA	TRUE	1	SCCmec_type_IVa(2B)	SCCmec_type_IVa(2B)	89.15	TRUE
1280_4743	MRSA	TRUE	1	SCCmec_type_IVa(2B)	SCCmec_type_IVa(2B)	88.94	TRUE
1280_30797	MRSA	TRUE	1	SCCmec_type_IVa(2B)	SCCmec_type_IVa(2B)	88.95	TRUE
1412772_3	MRSA	TRUE	1	SCCmec_type_IVa(2B)	SCCmec_type_IVa(2B)	88.98	TRUE
1280_16396	MSSA	FALSE	0			0	TRUE
1280_4488	MSSA	FALSE	0			0	TRUE
1280_18035	MRSA	TRUE	1	SCCmec_type_IVa(2B)	SCCmec_type_IVa(2B)	89.05	TRUE
1280_13680	MRSA	TRUE	1	SCCmec_type_IVc(2B)	SCCmec_type_IVc(2B)	93.87	TRUE
1280_28563	MSSA	FALSE	0			0	TRUE
1418277_3	MRSA	TRUE	1	SCCmec_type_IVa(2B)	SCCmec_type_IVa(2B)	88.52	TRUE
1280_4459	MSSA	FALSE	0			0	TRUE
1280_12369	MRSA	TRUE	1	SCCmec_type_IVa(2B)	SCCmec_type_IVa(2B)	88.9	TRUE
1410720_3	MRSA	TRUE	1	SCCmec_type_IVa(2B)	SCCmec_type_IVa(2B)	88.86	TRUE
1412705_3	MRSA	TRUE	1	SCCmec_type_IVa(2B)	SCCmec_type_IVa(2B)	88.66	TRUE
1410841_3	MRSA	TRUE	1	SCCmec_type_IVa(2B)	SCCmec_type_IVa(2B)	88.86	TRUE
1410714_3	MRSA	TRUE	1	SCCmec_type_IVa(2B)	SCCmec_type_IVa(2B)	88.64	TRUE
1412683_3	MRSA	TRUE	1	SCCmec_type_IVa(2B)	SCCmec_type_IVa(2B)	88.43	TRUE
1280_10025	MSSA	FALSE	0			0	TRUE
1280_18513	MRSA	TRUE	1	SCCmec_type_IVa(2B)	SCCmec_type_IVa(2B)	88.97	TRUE
1280_4540	MSSA	FALSE	0			0	TRUE
1280_4421	MRSA	TRUE	1	SCCmec_type_IVa(2B)	SCCmec_type_IVa(2B)	88.52	TRUE
1409707_3	MRSA	TRUE	1	SCCmec_type_IVa(2B)	SCCmec_type_IVa(2B)	88.84	TRUE
1412798_3	MRSA	TRUE	1	SCCmec_type_IVa(2B)	SCCmec_type_IVa(2B)	88.95	TRUE
1418434_3	MRSA	TRUE	1	SCCmec_type_IVa(2B)	SCCmec_type_IVa(2B)	88.69	TRUE
1409564_3	MRSA	TRUE	1	SCCmec_type_IVa(2B)	SCCmec_type_IVa(2B)	88.51	TRUE
1417058_3	MRSA	TRUE	1	SCCmec_type_IVa(2B)	SCCmec_type_IVa(2B)	88.86	TRUE
1409699_3	MRSA	TRUE	1	SCCmec_type_IVa(2B)	SCCmec_type_IVa(2B)	88.86	TRUE
46170_361	MRSA	TRUE	1	SCCmec_type_IVa(2B)	SCCmec_type_IVa(2B)	88.82	TRUE
1280_28641	MRSA	TRUE	1	SCCmec_type_IVa(2B)	SCCmec_type_IVa(2B)	88.96	TRUE
1280_12460	MRSA	TRUE	1	SCCmec_type_IVa(2B)	SCCmec_type_IVa(2B)	87.99	TRUE
1418270_3	MRSA	TRUE	1	SCCmec_type_IVa(2B)	SCCmec_type_IVa(2B)	88.86	TRUE
1409773_3	MRSA	TRUE	1	SCCmec_type_IVa(2B)	SCCmec_type_IVa(2B)	89	TRUE
1280_2218	MRSA	TRUE	1	SCCmec_type_IVa(2B)	SCCmec_type_IVa(2B)	88.58	TRUE
46170_565	MSSA	FALSE	0			0	TRUE
1410759_3	MRSA	TRUE	1	SCCmec_type_IVa(2B)	SCCmec_type_IVa(2B)	88.93	TRUE
1280_4003	MRSA	TRUE	1	SCCmec_type_IVa(2B)	SCCmec_type_IVa(2B)	89.06	TRUE
1280_23545	MSSA	FALSE	0			0	TRUE
1280_6000	MRSA	TRUE	Multiple	SCCmec_type_VI(4B)	SCCmec_type_VIII(4A)	72.4	FALSE
1280_4694	MRSA	TRUE	1	SCCmec_type_IVb(2B)	SCCmec_type_IVb(2B)	99.1	TRUE
1417089_3	MRSA	TRUE	1	SCCmec_type_IVa(2B)	SCCmec_type_IVa(2B)	88.8	TRUE
1280_17737	MSSA	FALSE	0			0	TRUE
1280_4995	MRSA	TRUE	1	SCCmec_type_IVa(2B)	SCCmec_type_IVa(2B)	88.99	TRUE
1280_10016	MSSA	FALSE	0			0	TRUE
1409465_3	MRSA	TRUE	1	SCCmec_type_IVa(2B)	SCCmec_type_IVa(2B)	88.81	TRUE
1410838_3	MRSA	TRUE	Multiple	SCCmec_type_IVg(2B)	SCCmec_type_IVc(2B)	79.72	FALSE
1280_3828	MRSA	TRUE	1	SCCmec_type_IVa(2B)	SCCmec_type_IVa(2B)	87.12	TRUE
1028799_3	MSSA	FALSE	0			0	TRUE
1280_4652	MRSA	TRUE	1	SCCmec_type_IVa(2B)	SCCmec_type_IVa(2B)	87.04	TRUE
1280_4358	MRSA	TRUE	1	SCCmec_type_IVa(2B)	SCCmec_type_IVa(2B)	88.82	TRUE
1409703_3	MRSA	TRUE	1	SCCmec_type_IVa(2B)	SCCmec_type_IVa(2B)	88.55	TRUE
1280_21640	MSSA	FALSE	0			0	TRUE
1412701_3	MRSA	TRUE	1	SCCmec_type_IVa(2B)	SCCmec_type_IVa(2B)	88.66	TRUE
1280_3886	MRSA	TRUE	1	SCCmec_type_IVa(2B)	SCCmec_type_IVa(2B)	87.02	TRUE
1280_11660	MSSA	FALSE	0			0	TRUE
1280_17867	MSSA	FALSE	0			0	TRUE
46170_500	MRSA	TRUE	1	SCCmec_type_IVa(2B)	SCCmec_type_IVa(2B)	89.01	TRUE
1280_4693	MRSA	TRUE	1	SCCmec_type_IVa(2B)	SCCmec_type_IVa(2B)	89	TRUE
1409779_3	MRSA	TRUE	1	SCCmec_type_IVa(2B)	SCCmec_type_IVa(2B)	87.74	TRUE
46170_348	MRSA	TRUE	1	SCCmec_type_IVa(2B)	SCCmec_type_IVa(2B)	88.76	TRUE
1417208_3	MRSA	TRUE	1	SCCmec_type_IVa(2B)	SCCmec_type_IVa(2B)	88.2	TRUE
1421879_3	MRSA	TRUE	1	SCCmec_type_IVa(2B)	SCCmec_type_IVa(2B)	88.37	TRUE
1412779_3	MRSA	TRUE	1	SCCmec_type_IVa(2B)	SCCmec_type_IVa(2B)	88.93	TRUE
1409650_3	MRSA	TRUE	1	SCCmec_type_IVa(2B)	SCCmec_type_IVa(2B)	88.72	TRUE
1280_16156	MRSA	TRUE	1	SCCmec_type_IVa(2B)	SCCmec_type_IVa(2B)	88.88	TRUE
46170_149	MRSA	TRUE	1	SCCmec_type_IVa(2B)	SCCmec_type_IVa(2B)	88.95	TRUE
1280_3698	MSSA	FALSE	0			0	TRUE
1280_3820	MSSA	FALSE	0			0	TRUE
1280_11659	MSSA	FALSE	0			0	TRUE
1280_17755	MSSA	FALSE	0			0	TRUE
1280_4787	MRSA	TRUE	1	SCCmec_type_IVa(2B)	SCCmec_type_IVa(2B)	87.09	TRUE
1418426_3	MRSA	TRUE	1	SCCmec_type_IVa(2B)	SCCmec_type_IVa(2B)	88.81	TRUE
1280_27477	MRSA	TRUE	1	SCCmec_type_IVa(2B)	SCCmec_type_IVa(2B)	88.85	TRUE
1410003_3	MRSA	TRUE	1	SCCmec_type_IVa(2B)	SCCmec_type_IVa(2B)	79.81	TRUE
1417063_3	MRSA	TRUE	1	SCCmec_type_IVa(2B)	SCCmec_type_IVa(2B)	88.98	TRUE
1280_3825	MRSA	TRUE	1	SCCmec_type_IVa(2B)	SCCmec_type_IVa(2B)	88.94	TRUE
1280_17944	MSSA	FALSE	0			0	TRUE
1280_7951	MSSA	FALSE	0			0	TRUE
1280_4762	MRSA	TRUE	1	SCCmec_type_IVa(2B)	SCCmec_type_IVa(2B)	88.87	TRUE
1280_4515	MRSA	TRUE	1	SCCmec_type_IVa(2B)	SCCmec_type_IVa(2B)	88.88	TRUE
1418365_3	MRSA	TRUE	1	SCCmec_type_IVa(2B)	SCCmec_type_IVa(2B)	88.11	TRUE
1280_4490	MRSA	TRUE	1	SCCmec_type_IVa(2B)	SCCmec_type_IVa(2B)	88.88	TRUE
1280_16254	MRSA	TRUE	1	SCCmec_type_IVa(2B)	SCCmec_type_IVa(2B)	88.11	TRUE
1280_12473	MRSA	TRUE	1	SCCmec_type_IVa(2B)	SCCmec_type_IVa(2B)	88.77	TRUE
1280_4506	MSSA	FALSE	0			0	TRUE
553567_3	MRSA	TRUE	1	SCCmec_type_II(2A)	SCCmec_type_II(2A)	95.02	TRUE
1280_4541	MRSA	TRUE	1	SCCmec_type_IVa(2B)	SCCmec_type_IVa(2B)	88.98	TRUE
46170_277	MRSA	TRUE	1	SCCmec_type_IVa(2B)	SCCmec_type_IVa(2B)	88.9	TRUE
1412784_3	MRSA	TRUE	1	SCCmec_type_IVa(2B)	SCCmec_type_IVa(2B)	88.52	TRUE
1417117_3	MRSA	TRUE	1	SCCmec_type_IVa(2B)	SCCmec_type_IVa(2B)	88.7	TRUE
1412717_3	MRSA	TRUE	1	SCCmec_type_IVa(2B)	SCCmec_type_IVa(2B)	88.59	TRUE
1280_12325	MRSA	TRUE	1	SCCmec_type_IVa(2B)	SCCmec_type_IVa(2B)	88.89	TRUE
1410777_3	MRSA	TRUE	1	SCCmec_type_IVa(2B)	SCCmec_type_IVa(2B)	88.93	TRUE
1409693_3	MRSA	TRUE	1	SCCmec_type_IVa(2B)	SCCmec_type_IVa(2B)	88.12	TRUE
1410743_3	MRSA	TRUE	1	SCCmec_type_IVa(2B)	SCCmec_type_IVa(2B)	88.62	TRUE
367830_75	MRSA	TRUE	1	SCCmec_type_IVa(2B)	SCCmec_type_IVa(2B)	89.06	TRUE
1280_18042	MRSA	TRUE	1	SCCmec_type_IVa(2B)	SCCmec_type_IVa(2B)	91.12	TRUE
1417170_3	MRSA	TRUE	1	SCCmec_type_IVa(2B)	SCCmec_type_IVa(2B)	88.77	TRUE
1418399_3	MRSA	TRUE	1	SCCmec_type_IVa(2B)	SCCmec_type_IVa(2B)	89.06	TRUE
1280_7296	MRSA	TRUE	1	SCCmec_type_IVa(2B)	SCCmec_type_IVa(2B)	86.61	TRUE
1280_4361	MRSA	TRUE	1	SCCmec_type_IVa(2B)	SCCmec_type_IVa(2B)	88.75	TRUE
1280_4368	MRSA	TRUE	1	SCCmec_type_IVa(2B)	SCCmec_type_IVa(2B)	87.71	TRUE
1280_18564	MSSA	FALSE	0			0	TRUE
1421897_3	MRSA	TRUE	1	SCCmec_type_IVa(2B)	SCCmec_type_IVa(2B)	88.88	TRUE
1280_28656	MRSA	TRUE	1	SCCmec_type_IVa(2B)	SCCmec_type_IVa(2B)	88.95	TRUE
1280_4538	MSSA	FALSE	0			0	TRUE
1280_4978	MSSA	FALSE	0			0	TRUE
1280_7295	MRSA	TRUE	Multiple	SCCmec_type_IVg(2B)	SCCmec_type_IVc(2B)	76.77	FALSE
1409517_3	MRSA	TRUE	1	SCCmec_type_IVa(2B)	SCCmec_type_IVa(2B)	86.32	TRUE
1412783_3	MRSA	TRUE	1	SCCmec_type_IVa(2B)	SCCmec_type_IVa(2B)	89.04	TRUE
1280_12543	MRSA	TRUE	1	SCCmec_type_IVa(2B)	SCCmec_type_IVa(2B)	88.49	TRUE
1280_3944	MRSA	TRUE	1	SCCmec_type_IVa(2B)	SCCmec_type_IVa(2B)	88.16	TRUE
1280_12376	MRSA	TRUE	1	SCCmec_type_IVa(2B)	SCCmec_type_IVa(2B)	88.82	TRUE
1412795_3	MRSA	TRUE	1	SCCmec_type_IVa(2B)	SCCmec_type_IVa(2B)	88.88	TRUE
46170_106	MRSA	TRUE	1	SCCmec_type_IVa(2B)	SCCmec_type_IVa(2B)	88.44	TRUE
1412631_3	MRSA	TRUE	1	SCCmec_type_IVa(2B)	SCCmec_type_IVa(2B)	88.76	TRUE
1392011_3	MRSA	TRUE	1	SCCmec_type_IVa(2B)	SCCmec_type_IVa(2B)	83.47	TRUE
1337995_3	MRSA	TRUE	1	SCCmec_type_IVa(2B)	SCCmec_type_IVa(2B)	89.06	TRUE
1417210_3	MRSA	TRUE	1	SCCmec_type_IVa(2B)	SCCmec_type_IVa(2B)	88.42	TRUE
1280_12464	MRSA	TRUE	1	SCCmec_type_IVa(2B)	SCCmec_type_IVa(2B)	88.58	TRUE
1280_16235	MRSA	TRUE	1	SCCmec_type_IVa(2B)	SCCmec_type_IVa(2B)	89.03	TRUE
1280_4701	MRSA	TRUE	1	SCCmec_type_IVa(2B)	SCCmec_type_IVa(2B)	86.94	TRUE
1280_4020	MRSA	TRUE	1	SCCmec_type_IVa(2B)	SCCmec_type_IVa(2B)	88.3	TRUE
1280_4503	MRSA	TRUE	1	SCCmec_type_IVa(2B)	SCCmec_type_IVa(2B)	88.58	TRUE
1409611_3	MRSA	TRUE	1	SCCmec_type_IVa(2B)	SCCmec_type_IVa(2B)	88.4	TRUE
1280_3952	MRSA	TRUE	1	SCCmec_type_IVa(2B)	SCCmec_type_IVa(2B)	88.93	TRUE
1280_16046	MSSA	FALSE	0			0	TRUE
1280_6196	MRSA	TRUE	1	SCCmec_type_IVa(2B)	SCCmec_type_IVa(2B)	84.66	TRUE
1280_4917	MRSA	TRUE	1	SCCmec_type_IVa(2B)	SCCmec_type_IVa(2B)	88.97	TRUE
1280_16332	MSSA	FALSE	0			0	TRUE
1409652_3	MRSA	TRUE	1	SCCmec_type_IVa(2B)	SCCmec_type_IVa(2B)	89.06	TRUE
1280_11661	MSSA	FALSE	0			0	TRUE
1280_3954	MRSA	TRUE	1	SCCmec_type_IVb(2B)	SCCmec_type_IVb(2B)	99.02	TRUE
1280_4948	MRSA	TRUE	1	SCCmec_type_IVa(2B)	SCCmec_type_IVa(2B)	88.91	TRUE
1280_11664	MSSA	FALSE	0			0	TRUE
1280_3971	MRSA	TRUE	1	SCCmec_type_IVa(2B)	SCCmec_type_IVa(2B)	87.62	TRUE
1280_4535	MRSA	TRUE	1	SCCmec_type_IVa(2B)	SCCmec_type_IVa(2B)	88.26	TRUE
1280_3965	MRSA	TRUE	1	SCCmec_type_IVa(2B)	SCCmec_type_IVa(2B)	88.96	TRUE
1280_18510	MRSA	TRUE	1	SCCmec_type_IVa(2B)	SCCmec_type_IVa(2B)	88.97	TRUE
1409433_3	MRSA	TRUE	1	SCCmec_type_IVa(2B)	SCCmec_type_IVa(2B)	88.8	TRUE
1409514_3	MRSA	TRUE	1	SCCmec_type_IVa(2B)	SCCmec_type_IVa(2B)	89.05	TRUE
1280_10022	MSSA	FALSE	0			0	TRUE
1418437_3	MRSA	TRUE	1	SCCmec_type_IVa(2B)	SCCmec_type_IVa(2B)	89	TRUE
1417047_3	MRSA	TRUE	1	SCCmec_type_IVa(2B)	SCCmec_type_IVa(2B)	88.66	TRUE
754026_3	MRSA	TRUE	1	SCCmec_type_IVc(2B)	SCCmec_type_IVc(2B)	91.23	TRUE
1280_3913	MRSA	TRUE	1	SCCmec_type_IVa(2B)	SCCmec_type_IVa(2B)	86.95	TRUE
1280_11670	MSSA	FALSE	0			0	TRUE
1280_4384	MRSA	TRUE	1	SCCmec_type_IVa(2B)	SCCmec_type_IVa(2B)	88.86	TRUE
1280_12584	MRSA	TRUE	1	SCCmec_type_IVa(2B)	SCCmec_type_IVa(2B)	88.8	TRUE
1280_4726	MRSA	TRUE	1	SCCmec_type_IVa(2B)	SCCmec_type_IVa(2B)	86.93	TRUE
1280_3937	MRSA	TRUE	1	SCCmec_type_IVa(2B)	SCCmec_type_IVa(2B)	88.88	TRUE
1280_12489	MRSA	TRUE	1	SCCmec_type_IVa(2B)	SCCmec_type_IVa(2B)	88.94	TRUE
1409726_3	MRSA	TRUE	1	SCCmec_type_IVa(2B)	SCCmec_type_IVa(2B)	88.99	TRUE
931442_3	MRSA	TRUE	1	SCCmec_type_II(2A)	SCCmec_type_II(2A)	97.26	TRUE
1280_3841	MRSA	TRUE	1	SCCmec_type_IVa(2B)	SCCmec_type_IVa(2B)	86.82	TRUE
1280_25064	MRSA	TRUE	Multiple	SCCmec_type_IV(2B)	SCCmec_type_II(2A)	52.1	FALSE
1280_28558	MSSA	FALSE	0			0	TRUE
1280_3909	MRSA	TRUE	1	SCCmec_type_IVa(2B)	SCCmec_type_IVa(2B)	88.97	TRUE
1280_9960	MSSA	FALSE	0			0	TRUE
1280_4715	MRSA	TRUE	1	SCCmec_type_IVa(2B)	SCCmec_type_IVa(2B)	88.98	TRUE
1417158_3	MRSA	TRUE	1	SCCmec_type_IVa(2B)	SCCmec_type_IVa(2B)	88.57	TRUE
1280_10019	MSSA	FALSE	0			0	TRUE
1280_12911	MRSA	TRUE	1	SCCmec_type_IVa(2B)	SCCmec_type_IVa(2B)	88.99	TRUE
1409523_3	MRSA	TRUE	1	SCCmec_type_IVa(2B)	SCCmec_type_IVa(2B)	88.69	TRUE
1280_12918	MRSA	TRUE	1	SCCmec_type_IVa(2B)	SCCmec_type_IVa(2B)	88.99	TRUE
1280_4018	MSSA	FALSE	0			0	TRUE
1409386_3	MRSA	TRUE	1	SCCmec_type_IVa(2B)	SCCmec_type_IVa(2B)	88.5	TRUE
1280_16438	MSSA	FALSE	0			0	TRUE
1421834_3	MRSA	TRUE	1	SCCmec_type_IVa(2B)	SCCmec_type_IVa(2B)	88.55	TRUE
1418368_3	MRSA	TRUE	1	SCCmec_type_IVa(2B)	SCCmec_type_IVa(2B)	88.96	TRUE
1280_3925	MRSA	TRUE	1	SCCmec_type_IVa(2B)	SCCmec_type_IVa(2B)	89	TRUE
1421843_3	MRSA	TRUE	1	SCCmec_type_IVa(2B)	SCCmec_type_IVa(2B)	88.6	TRUE
1280_17884	MRSA	TRUE	1	SCCmec_type_I(1B)	SCCmec_type_I(1B)	86.73	TRUE
1280_17891	MSSA	FALSE	0			0	TRUE
1280_4409	MRSA	TRUE	1	SCCmec_type_IVa(2B)	SCCmec_type_IVa(2B)	89.06	TRUE
1280_3976	MRSA	TRUE	1	SCCmec_type_IVa(2B)	SCCmec_type_IVa(2B)	86.91	TRUE
1417177_3	MRSA	TRUE	1	SCCmec_type_IVa(2B)	SCCmec_type_IVa(2B)	88.95	TRUE
1280_4030	MRSA	TRUE	1	SCCmec_type_IVa(2B)	SCCmec_type_IVa(2B)	89.06	TRUE
1280_12477	MRSA	TRUE	1	SCCmec_type_IVa(2B)	SCCmec_type_IVa(2B)	88.88	TRUE
1280_7312	MRSA	TRUE	1	SCCmec_type_IVa(2B)	SCCmec_type_IVa(2B)	86.71	TRUE
1412812_3	MRSA	TRUE	1	SCCmec_type_IVa(2B)	SCCmec_type_IVa(2B)	88.93	TRUE
1280_4980	MRSA	TRUE	1	SCCmec_type_IVa(2B)	SCCmec_type_IVa(2B)	89.04	TRUE
1418433_3	MRSA	TRUE	1	SCCmec_type_IVa(2B)	SCCmec_type_IVa(2B)	87.46	TRUE
1280_4001	MRSA	TRUE	1	SCCmec_type_IVa(2B)	SCCmec_type_IVa(2B)	89.07	TRUE
1280_3384	MRSA	TRUE	1	SCCmec_type_IVa(2B)	SCCmec_type_IVa(2B)	86.94	TRUE
1409467_3	MRSA	TRUE	1	SCCmec_type_IVa(2B)	SCCmec_type_IVa(2B)	88.39	TRUE
1411567_3	MRSA	TRUE	1	SCCmec_type_IVa(2B)	SCCmec_type_IVa(2B)	88.41	TRUE
1280_4426	MRSA	TRUE	1	SCCmec_type_IVa(2B)	SCCmec_type_IVa(2B)	89.02	TRUE
1402811_3	MRSA	TRUE	Multiple	SCCmec_type_IVg(2B)	SCCmec_type_IVc(2B)	76.37	FALSE
46170_363	MRSA	TRUE	1	SCCmec_type_IVa(2B)	SCCmec_type_IVa(2B)	88.86	TRUE
1280_4725	MRSA	TRUE	1	SCCmec_type_IVa(2B)	SCCmec_type_IVa(2B)	87.86	TRUE
1410713_3	MRSA	TRUE	1	SCCmec_type_IVa(2B)	SCCmec_type_IVa(2B)	88.78	TRUE
1412792_3	MRSA	TRUE	Multiple	SCCmec_type_IVg(2B)	SCCmec_type_IVc(2B)	77.81	FALSE
1409578_3	MRSA	TRUE	1	SCCmec_type_IVa(2B)	SCCmec_type_IVa(2B)	88.99	TRUE
1417156_3	MRSA	TRUE	1	SCCmec_type_IVa(2B)	SCCmec_type_IVa(2B)	88.51	TRUE
1280_12318	MRSA	TRUE	1	SCCmec_type_IVa(2B)	SCCmec_type_IVa(2B)	88.93	TRUE
1280_4041	MRSA	TRUE	1	SCCmec_type_IVa(2B)	SCCmec_type_IVa(2B)	88.52	TRUE
1280_16300	MRSA	TRUE	1	SCCmec_type_IVa(2B)	SCCmec_type_IVa(2B)	88.86	TRUE
1280_3890	MRSA	TRUE	Multiple	SCCmec_type_IVg(2B)	SCCmec_type_IVc(2B)	80.13	FALSE
1280_4644	MRSA	TRUE	1	SCCmec_type_IVa(2B)	SCCmec_type_IVa(2B)	87.79	TRUE
1280_3847	MRSA	TRUE	1	SCCmec_type_IVa(2B)	SCCmec_type_IVa(2B)	88.91	TRUE
1280_4722	MRSA	TRUE	1	SCCmec_type_IVa(2B)	SCCmec_type_IVa(2B)	88.79	TRUE
1421851_3	MRSA	TRUE	1	SCCmec_type_IVa(2B)	SCCmec_type_IVa(2B)	88.73	TRUE
1280_4659	MRSA	TRUE	1	SCCmec_type_IVa(2B)	SCCmec_type_IVa(2B)	88.86	TRUE
1280_18603	MRSA	TRUE	1	SCCmec_type_IVa(2B)	SCCmec_type_IVa(2B)	89.05	TRUE
1421881_3	MRSA	TRUE	1	SCCmec_type_IVa(2B)	SCCmec_type_IVa(2B)	87.88	TRUE
1280_4723	MRSA	TRUE	1	SCCmec_type_IVa(2B)	SCCmec_type_IVa(2B)	88.73	TRUE
1280_17746	MSSA	FALSE	0			0	TRUE
1409509_3	MRSA	TRUE	1	SCCmec_type_IVa(2B)	SCCmec_type_IVa(2B)	91.2	TRUE
1280_2215	MRSA	TRUE	1	SCCmec_type_IVa(2B)	SCCmec_type_IVa(2B)	88.33	TRUE
1280_4012	MRSA	TRUE	1	SCCmec_type_IVa(2B)	SCCmec_type_IVa(2B)	88.16	TRUE
1280_27475	MRSA	TRUE	1	SCCmec_type_IVa(2B)	SCCmec_type_IVa(2B)	89.04	TRUE
1409674_3	MRSA	TRUE	1	SCCmec_type_IVa(2B)	SCCmec_type_IVa(2B)	88.57	TRUE
1280_3920	MSSA	FALSE	0			0	TRUE
1280_17761	MSSA	FALSE	0			0	TRUE
1280_3822	MRSA	TRUE	1	SCCmec_type_IVa(2B)	SCCmec_type_IVa(2B)	88.99	TRUE
1280_4951	MRSA	TRUE	1	SCCmec_type_IVa(2B)	SCCmec_type_IVa(2B)	89.07	TRUE
1280_17851	MSSA	FALSE	0			0	TRUE
1280_17918	MSSA	FALSE	0			0	TRUE
1418320_3	MRSA	TRUE	1	SCCmec_type_IVa(2B)	SCCmec_type_IVa(2B)	88.42	TRUE
1412761_3	MRSA	TRUE	1	SCCmec_type_IVa(2B)	SCCmec_type_IVa(2B)	88.99	TRUE
1418371_3	MRSA	TRUE	1	SCCmec_type_IVa(2B)	SCCmec_type_IVa(2B)	88.76	TRUE
1280_3936	MRSA	TRUE	1	SCCmec_type_IVa(2B)	SCCmec_type_IVa(2B)	89	TRUE
1280_3906	MRSA	TRUE	1	SCCmec_type_IVa(2B)	SCCmec_type_IVa(2B)	88.48	TRUE
1409363_3	MRSA	TRUE	1	SCCmec_type_IVa(2B)	SCCmec_type_IVa(2B)	88.65	TRUE
1280_16333	MSSA	FALSE	0			0	TRUE
1280_3994	MRSA	TRUE	1	SCCmec_type_IVa(2B)	SCCmec_type_IVa(2B)	86.9	TRUE
1409675_3	MRSA	TRUE	1	SCCmec_type_IVa(2B)	SCCmec_type_IVa(2B)	88.68	TRUE
1412789_3	MRSA	TRUE	1	SCCmec_type_IVa(2B)	SCCmec_type_IVa(2B)	88.68	TRUE
1280_11677	MRSA	TRUE	1	SCCmec_type_IVa(2B)	SCCmec_type_IVa(2B)	88.97	TRUE
1280_3867	MRSA	TRUE	1	SCCmec_type_IVa(2B)	SCCmec_type_IVa(2B)	88.88	TRUE
1280_7289	MRSA	TRUE	Multiple	SCCmec_type_IVg(2B)	SCCmec_type_IVc(2B)	77.85	FALSE
1410817_3	MRSA	TRUE	1	SCCmec_type_IVa(2B)	SCCmec_type_IVa(2B)	88.7	TRUE
1418310_3	MRSA	TRUE	1	SCCmec_type_IVa(2B)	SCCmec_type_IVa(2B)	88.38	TRUE
1608891_4	MRSA	TRUE	1	SCCmec_type_IVa(2B)	SCCmec_type_IVa(2B)	87.29	TRUE
1280_3849	MSSA	FALSE	0			0	TRUE
1280_17983	MRSA	TRUE	1	SCCmec_type_IVc(2B)	SCCmec_type_IVc(2B)	93.59	TRUE
1280_8291	MSSA	FALSE	0			0	TRUE
1412628_3	MRSA	TRUE	1	SCCmec_type_IVa(2B)	SCCmec_type_IVa(2B)	88.75	TRUE
1409416_3	MRSA	TRUE	1	SCCmec_type_IVa(2B)	SCCmec_type_IVa(2B)	88.6	TRUE
1412803_3	MRSA	TRUE	Multiple	SCCmec_type_IV(2B)	SCCmec_type_II(2A)	50.07	FALSE
1280_8124	MSSA	FALSE	0			0	TRUE
1411576_3	MRSA	TRUE	1	SCCmec_type_IVa(2B)	SCCmec_type_IVa(2B)	88.61	TRUE
1280_18582	MRSA	TRUE	Multiple	SCCmec_type_IVg(2B)	SCCmec_type_IVc(2B)	79.37	FALSE
1280_17840	MSSA	FALSE	0			0	TRUE
1280_4708	MRSA	TRUE	1	SCCmec_type_IVa(2B)	SCCmec_type_IVa(2B)	88.94	TRUE
1280_4371	MRSA	TRUE	Multiple	SCCmec_type_IVg(2B)	SCCmec_type_IVc(2B)	78.43	FALSE
1280_3829	MRSA	TRUE	1	SCCmec_type_IVa(2B)	SCCmec_type_IVa(2B)	89.04	TRUE
1280_4494	MSSA	FALSE	0			0	TRUE
1280_3917	MRSA	TRUE	1	SCCmec_type_IVa(2B)	SCCmec_type_IVa(2B)	88.75	TRUE
1280_18095	MSSA	FALSE	0			0	TRUE
1417159_3	MRSA	TRUE	1	SCCmec_type_IVa(2B)	SCCmec_type_IVa(2B)	88.89	TRUE
1280_4407	MSSA	FALSE	0			0	TRUE
1280_4763	MRSA	TRUE	1	SCCmec_type_IVa(2B)	SCCmec_type_IVa(2B)	88.86	TRUE
1409458_3	MRSA	TRUE	1	SCCmec_type_IVa(2B)	SCCmec_type_IVa(2B)	88.66	TRUE
1280_12449	MSSA	FALSE	0			0	TRUE
1418341_3	MRSA	TRUE	1	SCCmec_type_IVa(2B)	SCCmec_type_IVa(2B)	88.95	TRUE
1280_3957	MSSA	FALSE	0			0	TRUE
1280_16000	MSSA	FALSE	0			0	TRUE
1280_4537	MSSA	FALSE	0			0	TRUE
1421875_3	MRSA	TRUE	1	SCCmec_type_IVa(2B)	SCCmec_type_IVa(2B)	87.98	TRUE
1280_3904	MRSA	TRUE	1	SCCmec_type_IVa(2B)	SCCmec_type_IVa(2B)	88.66	TRUE
46170_136	MSSA	FALSE	0			0	TRUE
1409634_3	MRSA	TRUE	1	SCCmec_type_IVa(2B)	SCCmec_type_IVa(2B)	89.05	TRUE
1409422_3	MRSA	TRUE	1	SCCmec_type_IVa(2B)	SCCmec_type_IVa(2B)	88.6	TRUE
1280_4962	MRSA	TRUE	1	SCCmec_type_IVa(2B)	SCCmec_type_IVa(2B)	89.03	TRUE
1280_3840	MRSA	TRUE	Multiple	SCCmec_type_IVg(2B)	SCCmec_type_IVc(2B)	80.2	FALSE
1280_4381	MRSA	TRUE	Multiple	SCCmec_type_IVg(2B)	SCCmec_type_IVc(2B)	79.28	FALSE
1280_10472	MSSA	FALSE	0			0	TRUE
1280_4397	MRSA	TRUE	1	SCCmec_type_IVa(2B)	SCCmec_type_IVa(2B)	88.94	TRUE
1280_3911	MRSA	TRUE	1	SCCmec_type_IVa(2B)	SCCmec_type_IVa(2B)	88.93	TRUE
1421890_3	MRSA	TRUE	1	SCCmec_type_IVa(2B)	SCCmec_type_IVa(2B)	89	TRUE
1280_3879	MSSA	FALSE	0			0	TRUE
1412693_3	MRSA	TRUE	1	SCCmec_type_IVa(2B)	SCCmec_type_IVa(2B)	88.69	TRUE
1411520_3	MRSA	TRUE	1	SCCmec_type_IVa(2B)	SCCmec_type_IVa(2B)	88.62	TRUE
1280_4519	MRSA	TRUE	1	SCCmec_type_IVa(2B)	SCCmec_type_IVa(2B)	88.69	TRUE
1410694_3	MRSA	TRUE	1	SCCmec_type_IVa(2B)	SCCmec_type_IVa(2B)	88.99	TRUE
1280_4376	MRSA	TRUE	1	SCCmec_type_IVa(2B)	SCCmec_type_IVa(2B)	89	TRUE
1280_4464	MRSA	TRUE	1	SCCmec_type_IVd(2B)	SCCmec_type_IVd(2B)	96.42	TRUE
1280_28655	MRSA	TRUE	1	SCCmec_type_IVa(2B)	SCCmec_type_IVa(2B)	89.01	TRUE
1280_4944	MSSA	FALSE	0			0	TRUE
1418389_3	MRSA	TRUE	1	SCCmec_type_IVa(2B)	SCCmec_type_IVa(2B)	88.66	TRUE
1417175_3	MRSA	TRUE	1	SCCmec_type_IVa(2B)	SCCmec_type_IVa(2B)	88.57	TRUE
1156994_3	MRSA	TRUE	1	SCCmec_type_IVa(2B)	SCCmec_type_IVa(2B)	89.06	TRUE
1280_4055	MRSA	TRUE	1	SCCmec_type_IVc(2B)	SCCmec_type_IVc(2B)	93.84	TRUE
1280_4754	MSSA	FALSE	0			0	TRUE
1280_3852	MRSA	TRUE	1	SCCmec_type_IVc(2B)	SCCmec_type_IVc(2B)	93.77	TRUE
1410715_3	MRSA	TRUE	1	SCCmec_type_IVa(2B)	SCCmec_type_IVa(2B)	88.67	TRUE
46170_159	MRSA	TRUE	1	SCCmec_type_IVc(2B)	SCCmec_type_IVc(2B)	93.84	TRUE
1280_4484	MRSA	TRUE	1	SCCmec_type_IVa(2B)	SCCmec_type_IVa(2B)	88.02	TRUE
1410911_3	MRSA	TRUE	1	SCCmec_type_IVa(2B)	SCCmec_type_IVa(2B)	88.68	TRUE
1418374_3	MRSA	TRUE	1	SCCmec_type_IVa(2B)	SCCmec_type_IVa(2B)	88.58	TRUE
1387328_3	MRSA	TRUE	1	SCCmec_type_IVa(2B)	SCCmec_type_IVa(2B)	88.51	TRUE
1280_4423	MRSA	TRUE	1	SCCmec_type_IVa(2B)	SCCmec_type_IVa(2B)	88.61	TRUE
1409478_3	MRSA	TRUE	1	SCCmec_type_IVa(2B)	SCCmec_type_IVa(2B)	88.25	TRUE
1280_4031	MRSA	TRUE	1	SCCmec_type_IVa(2B)	SCCmec_type_IVa(2B)	88.62	TRUE
1409708_3	MRSA	TRUE	1	SCCmec_type_IVa(2B)	SCCmec_type_IVa(2B)	88.86	TRUE
1410904_3	MRSA	TRUE	1	SCCmec_type_IVd(2B)	SCCmec_type_IVd(2B)	98.4	TRUE
46170_362	MRSA	TRUE	1	SCCmec_type_IVa(2B)	SCCmec_type_IVa(2B)	89.03	TRUE
1409439_3	MRSA	TRUE	1	SCCmec_type_IVa(2B)	SCCmec_type_IVa(2B)	88.87	TRUE
1280_3882	MRSA	TRUE	1	SCCmec_type_IVa(2B)	SCCmec_type_IVa(2B)	88.42	TRUE
1280_15879	MSSA	FALSE	0			0	TRUE
1280_3878	MRSA	TRUE	1	SCCmec_type_IVa(2B)	SCCmec_type_IVa(2B)	89	TRUE
1280_3729	MSSA	FALSE	0			0	TRUE
1412765_3	MRSA	TRUE	1	SCCmec_type_IVa(2B)	SCCmec_type_IVa(2B)	88.53	TRUE
1280_4673	MRSA	TRUE	1	SCCmec_type_IVa(2B)	SCCmec_type_IVa(2B)	88.99	TRUE
1280_4757	MRSA	TRUE	1	SCCmec_type_IVa(2B)	SCCmec_type_IVa(2B)	87.03	TRUE
1280_9767	MSSA	FALSE	0			0	TRUE
1280_21617	MSSA	FALSE	0			0	TRUE
1417212_3	MRSA	TRUE	1	SCCmec_type_IVa(2B)	SCCmec_type_IVa(2B)	88.51	TRUE
1421866_3	MRSA	TRUE	1	SCCmec_type_IVa(2B)	SCCmec_type_IVa(2B)	88.8	TRUE
1156997_3	MRSA	TRUE	1	SCCmec_type_IVa(2B)	SCCmec_type_IVa(2B)	88.93	TRUE
1280_4051	MRSA	TRUE	1	SCCmec_type_IVa(2B)	SCCmec_type_IVa(2B)	86.99	TRUE
1409588_3	MRSA	TRUE	1	SCCmec_type_IVa(2B)	SCCmec_type_IVa(2B)	88.68	TRUE
1280_4782	MRSA	TRUE	1	SCCmec_type_IVa(2B)	SCCmec_type_IVa(2B)	88.16	TRUE
1280_7291	MRSA	TRUE	Multiple	SCCmec_type_IV(2B)	SCCmec_type_II(2A)	58.83	FALSE
1280_4665	MRSA	TRUE	1	SCCmec_type_IVa(2B)	SCCmec_type_IVa(2B)	86.95	TRUE
46170_1024	MSSA	FALSE	0			0	TRUE
1421832_3	MRSA	TRUE	1	SCCmec_type_IVa(2B)	SCCmec_type_IVa(2B)	88.3	TRUE
1280_8093	MSSA	FALSE	0			0	TRUE
1409719_3	MRSA	TRUE	1	SCCmec_type_IVa(2B)	SCCmec_type_IVa(2B)	88.51	TRUE
1280_12589	MRSA	TRUE	1	SCCmec_type_IVa(2B)	SCCmec_type_IVa(2B)	88.82	TRUE
1280_4930	MSSA	FALSE	0			0	TRUE
1280_11653	MSSA	FALSE	0			0	TRUE
1409552_3	MRSA	TRUE	Multiple	SCCmec_type_IVg(2B)	SCCmec_type_IVc(2B)	79.12	FALSE
1280_4809	MSSA	FALSE	0			0	TRUE
1280_16199	MRSA	TRUE	1	SCCmec_type_IVa(2B)	SCCmec_type_IVa(2B)	88.75	TRUE
1280_4357	MRSA	TRUE	1	SCCmec_type_IVa(2B)	SCCmec_type_IVa(2B)	86.96	TRUE
1409432_3	MRSA	TRUE	1	SCCmec_type_IVa(2B)	SCCmec_type_IVa(2B)	88.85	TRUE
46170_593	MSSA	FALSE	0			0	TRUE
1280_3809	MRSA	TRUE	1	SCCmec_type_IVa(2B)	SCCmec_type_IVa(2B)	88.58	TRUE
1280_16757	MRSA	TRUE	1	SCCmec_type_IVc(2B)	SCCmec_type_IVc(2B)	82.77	TRUE
1280_11650	MSSA	FALSE	0			0	TRUE
1280_4672	MRSA	TRUE	1	SCCmec_type_IVa(2B)	SCCmec_type_IVa(2B)	88.94	TRUE
1280_3986	MRSA	TRUE	1	SCCmec_type_IVa(2B)	SCCmec_type_IVa(2B)	88.86	TRUE
1280_11684	MRSA	TRUE	1	SCCmec_type_IVa(2B)	SCCmec_type_IVa(2B)	89	TRUE
1280_4011	MRSA	TRUE	1	SCCmec_type_IVa(2B)	SCCmec_type_IVa(2B)	88.66	TRUE
1410808_3	MRSA	TRUE	1	SCCmec_type_IVa(2B)	SCCmec_type_IVa(2B)	88.63	TRUE
46170_357	MRSA	TRUE	1	SCCmec_type_IVa(2B)	SCCmec_type_IVa(2B)	88.91	TRUE
1417034_3	MRSA	TRUE	1	SCCmec_type_IVa(2B)	SCCmec_type_IVa(2B)	88.77	TRUE
1280_4679	MRSA	TRUE	1	SCCmec_type_IVa(2B)	SCCmec_type_IVa(2B)	88.46	TRUE
1280_4755	MRSA	TRUE	1	SCCmec_type_IVa(2B)	SCCmec_type_IVa(2B)	86.82	TRUE
1280_4380	MRSA	TRUE	1	SCCmec_type_IVa(2B)	SCCmec_type_IVa(2B)	88.9	TRUE
1280_16205	MRSA	TRUE	1	SCCmec_type_IVa(2B)	SCCmec_type_IVa(2B)	86.82	TRUE
1280_3833	MRSA	TRUE	1	SCCmec_type_IVa(2B)	SCCmec_type_IVa(2B)	88.94	TRUE
1280_12312	MRSA	TRUE	1	SCCmec_type_IVa(2B)	SCCmec_type_IVa(2B)	88.74	TRUE
1280_21790	MRSA	TRUE	1	SCCmec_type_IVa(2B)	SCCmec_type_IVa(2B)	88.96	TRUE
1280_8146	MSSA	FALSE	0			0	TRUE
1417039_3	MRSA	TRUE	1	SCCmec_type_IVa(2B)	SCCmec_type_IVa(2B)	88.93	TRUE
1280_3843	MRSA	TRUE	1	SCCmec_type_IVa(2B)	SCCmec_type_IVa(2B)	88.9	TRUE
1280_4478	MRSA	TRUE	1	SCCmec_type_IVa(2B)	SCCmec_type_IVa(2B)	88.81	TRUE
1412714_3	MRSA	TRUE	1	SCCmec_type_IVa(2B)	SCCmec_type_IVa(2B)	85.69	TRUE
1280_16728	MRSA	TRUE	1	SCCmec_type_IVc(2B)	SCCmec_type_IVc(2B)	93.11	TRUE
1280_3898	MRSA	TRUE	1	SCCmec_type_IVa(2B)	SCCmec_type_IVa(2B)	88.19	TRUE
1280_24305	MSSA	FALSE	0			0	TRUE
1280_11655	MSSA	FALSE	0			0	TRUE
1410901_3	MRSA	TRUE	1	SCCmec_type_IVa(2B)	SCCmec_type_IVa(2B)	89.06	TRUE
451515_3	MRSA	TRUE	1	SCCmec_type_IVa(2B)	SCCmec_type_IVa(2B)	89.04	TRUE
1280_3985	MRSA	TRUE	1	SCCmec_type_IVa(2B)	SCCmec_type_IVa(2B)	88.98	TRUE
1409580_3	MRSA	TRUE	1	SCCmec_type_IVa(2B)	SCCmec_type_IVa(2B)	88.88	TRUE
1280_4684	MRSA	TRUE	1	SCCmec_type_IVa(2B)	SCCmec_type_IVa(2B)	88.93	TRUE
1418296_3	MRSA	TRUE	1	SCCmec_type_IVa(2B)	SCCmec_type_IVa(2B)	88.92	TRUE
1280_3855	MRSA	TRUE	1	SCCmec_type_IVa(2B)	SCCmec_type_IVa(2B)	88.58	TRUE
1280_17827	MSSA	FALSE	0			0	TRUE
1409775_3	MRSA	TRUE	1	SCCmec_type_IVa(2B)	SCCmec_type_IVa(2B)	88.61	TRUE
1280_4529	MRSA	TRUE	1	SCCmec_type_IVa(2B)	SCCmec_type_IVa(2B)	88.76	TRUE
1417164_3	MRSA	TRUE	1	SCCmec_type_IVa(2B)	SCCmec_type_IVa(2B)	88.46	TRUE
1410716_3	MRSA	TRUE	Multiple	SCCmec_type_IVg(2B)	SCCmec_type_IVc(2B)	79.1	FALSE
1280_4700	MRSA	TRUE	1	SCCmec_type_IVa(2B)	SCCmec_type_IVa(2B)	88.89	TRUE
1418378_3	MRSA	TRUE	1	SCCmec_type_IVa(2B)	SCCmec_type_IVa(2B)	89.06	TRUE
1280_23546	MSSA	FALSE	0			0	TRUE
1280_12331	MRSA	TRUE	1	SCCmec_type_IVa(2B)	SCCmec_type_IVa(2B)	88.84	TRUE
1409709_3	MRSA	TRUE	1	SCCmec_type_IVa(2B)	SCCmec_type_IVa(2B)	89.05	TRUE
1280_9851	MSSA	FALSE	0			0	TRUE
1392048_3	MRSA	TRUE	1	SCCmec_type_IVa(2B)	SCCmec_type_IVa(2B)	83.22	TRUE
1280_4040	MRSA	TRUE	1	SCCmec_type_IVa(2B)	SCCmec_type_IVa(2B)	91.22	TRUE
1280_3892	MRSA	TRUE	1	SCCmec_type_IVa(2B)	SCCmec_type_IVa(2B)	88.58	TRUE
1409666_3	MRSA	TRUE	1	SCCmec_type_IVa(2B)	SCCmec_type_IVa(2B)	89.05	TRUE
1280_12579	MRSA	TRUE	1	SCCmec_type_IVa(2B)	SCCmec_type_IVa(2B)	89.05	TRUE
1280_4861	MRSA	TRUE	1	SCCmec_type_IVa(2B)	SCCmec_type_IVa(2B)	89.05	TRUE
46170_158	MRSA	TRUE	1	SCCmec_type_IVc(2B)	SCCmec_type_IVc(2B)	93.77	TRUE
1280_17813	MSSA	FALSE	0			0	TRUE
1280_3942	MRSA	TRUE	1	SCCmec_type_IVa(2B)	SCCmec_type_IVa(2B)	88.93	TRUE
1280_13688	MRSA	TRUE	1	SCCmec_type_IVd(2B)	SCCmec_type_IVd(2B)	99.61	TRUE
1280_4390	MRSA	TRUE	Multiple	SCCmec_type_IVg(2B)	SCCmec_type_IVc(2B)	79.28	FALSE
1280_4510	MRSA	TRUE	1	SCCmec_type_IVa(2B)	SCCmec_type_IVa(2B)	86.79	TRUE
1280_30868	MRSA	TRUE	1	SCCmec_type_IVa(2B)	SCCmec_type_IVa(2B)	88.93	TRUE
1280_12308	MRSA	TRUE	1	SCCmec_type_IVa(2B)	SCCmec_type_IVa(2B)	89	TRUE
1280_26025	MSSA	FALSE	0			0	TRUE
1280_3871	MRSA	TRUE	1	SCCmec_type_IVa(2B)	SCCmec_type_IVa(2B)	88.84	TRUE
1280_8658	MSSA	FALSE	0			0	TRUE
1280_16157	MRSA	TRUE	1	SCCmec_type_IVa(2B)	SCCmec_type_IVa(2B)	89	TRUE
1280_3963	MRSA	TRUE	1	SCCmec_type_IVa(2B)	SCCmec_type_IVa(2B)	87.62	TRUE
1280_4825	MSSA	FALSE	0			0	TRUE
1388709_3	MRSA	TRUE	1	SCCmec_type_IVa(2B)	SCCmec_type_IVa(2B)	83.51	TRUE
1280_4463	MRSA	TRUE	1	SCCmec_type_IVa(2B)	SCCmec_type_IVa(2B)	88.88	TRUE
1280_18053	MSSA	FALSE	0			0	TRUE
1410821_3	MRSA	TRUE	1	SCCmec_type_IVa(2B)	SCCmec_type_IVa(2B)	88.83	TRUE
1409481_3	MRSA	TRUE	1	SCCmec_type_IVa(2B)	SCCmec_type_IVa(2B)	88.82	TRUE
46170_342	MRSA	TRUE	1	SCCmec_type_IVa(2B)	SCCmec_type_IVa(2B)	88.88	TRUE
1418394_3	MRSA	TRUE	1	SCCmec_type_IVa(2B)	SCCmec_type_IVa(2B)	87.45	TRUE
1280_3583	MRSA	TRUE	1	SCCmec_type_IVc(2B)	SCCmec_type_IVc(2B)	93.2	TRUE
1280_3899	MRSA	TRUE	1	SCCmec_type_IVa(2B)	SCCmec_type_IVa(2B)	88.94	TRUE
1280_25144	MRSA	TRUE	Multiple	SCCmec_type_IV(2B)	SCCmec_type_II(2A)	51.1	FALSE
1280_18059	MSSA	FALSE	0			0	TRUE
1280_17832	MSSA	FALSE	0			0	TRUE
1410899_3	MRSA	TRUE	1	SCCmec_type_IVa(2B)	SCCmec_type_IVa(2B)	89.01	TRUE
1409628_3	MRSA	TRUE	1	SCCmec_type_IVa(2B)	SCCmec_type_IVa(2B)	88.86	TRUE
1280_28568	MSSA	FALSE	0			0	TRUE
1280_3935	MRSA	TRUE	1	SCCmec_type_IVa(2B)	SCCmec_type_IVa(2B)	88.93	TRUE
1409454_3	MRSA	TRUE	1	SCCmec_type_IVa(2B)	SCCmec_type_IVa(2B)	88.7	TRUE
1280_12458	MRSA	TRUE	1	SCCmec_type_IVa(2B)	SCCmec_type_IVa(2B)	88.67	TRUE
1418440_3	MRSA	TRUE	1	SCCmec_type_IVa(2B)	SCCmec_type_IVa(2B)	88.75	TRUE
1280_4986	MRSA	TRUE	1	SCCmec_type_IVa(2B)	SCCmec_type_IVa(2B)	89.06	TRUE
1280_21164	MRSA	TRUE	1	SCCmec_type_IVa(2B)	SCCmec_type_IVa(2B)	89.04	TRUE
1280_4732	MRSA	TRUE	1	SCCmec_type_IVa(2B)	SCCmec_type_IVa(2B)	88.99	TRUE
1280_4485	MRSA	TRUE	1	SCCmec_type_IVa(2B)	SCCmec_type_IVa(2B)	89	TRUE
1280_4918	MRSA	TRUE	1	SCCmec_type_IVa(2B)	SCCmec_type_IVa(2B)	89.03	TRUE
1280_4402	MRSA	TRUE	1	SCCmec_type_IVa(2B)	SCCmec_type_IVa(2B)	88.63	TRUE
1421836_3	MRSA	TRUE	1	SCCmec_type_IVa(2B)	SCCmec_type_IVa(2B)	88.65	TRUE
1411510_3	MRSA	TRUE	1	SCCmec_type_IVa(2B)	SCCmec_type_IVa(2B)	88.71	TRUE
1280_17860	MSSA	FALSE	0			0	TRUE
1409659_3	MRSA	TRUE	1	SCCmec_type_IVa(2B)	SCCmec_type_IVa(2B)	87.33	TRUE
1418331_3	MRSA	TRUE	1	SCCmec_type_IVa(2B)	SCCmec_type_IVa(2B)	88.98	TRUE
1280_3517	MSSA	FALSE	0			0	TRUE
1412666_3	MRSA	TRUE	Multiple	SCCmec_type_IVg(2B)	SCCmec_type_IVc(2B)	79.85	FALSE
1417154_3	MRSA	TRUE	1	SCCmec_type_IVa(2B)	SCCmec_type_IVa(2B)	88.12	TRUE
1280_4015	MRSA	TRUE	1	SCCmec_type_IVa(2B)	SCCmec_type_IVa(2B)	88.99	TRUE
1280_24281	MSSA	FALSE	0			0	TRUE
1418346_3	MRSA	TRUE	1	SCCmec_type_IVa(2B)	SCCmec_type_IVa(2B)	88.91	TRUE
1421876_3	MRSA	TRUE	1	SCCmec_type_IVa(2B)	SCCmec_type_IVa(2B)	88.47	TRUE
1280_23575	MSSA	FALSE	0			0	TRUE
1418325_3	MRSA	TRUE	1	SCCmec_type_IVa(2B)	SCCmec_type_IVa(2B)	88.88	TRUE
1280_26576	MSSA	FALSE	0			0	TRUE
1280_25982	MSSA	FALSE	0			0	TRUE
1417205_3	MRSA	TRUE	1	SCCmec_type_IVa(2B)	SCCmec_type_IVa(2B)	89.05	TRUE
1409657_3	MRSA	TRUE	1	SCCmec_type_IVa(2B)	SCCmec_type_IVa(2B)	88.58	TRUE
1280_4039	MRSA	TRUE	1	SCCmec_type_IVa(2B)	SCCmec_type_IVa(2B)	87.18	TRUE
1280_4819	MRSA	TRUE	1	SCCmec_type_IVd(2B)	SCCmec_type_IVd(2B)	100	TRUE
1411512_3	MRSA	TRUE	Multiple	SCCmec_type_IVg(2B)	SCCmec_type_IVc(2B)	79.8	FALSE
1410801_3	MRSA	TRUE	1	SCCmec_type_IVa(2B)	SCCmec_type_IVa(2B)	89.18	TRUE
1157001_3	MRSA	TRUE	1	SCCmec_type_IVa(2B)	SCCmec_type_IVa(2B)	89	TRUE
1280_28556	MSSA	FALSE	0			0	TRUE
1280_16306	MRSA	TRUE	1	SCCmec_type_IVc(2B)	SCCmec_type_IVc(2B)	93.77	TRUE
1409414_3	MRSA	TRUE	1	SCCmec_type_IVa(2B)	SCCmec_type_IVa(2B)	88.69	TRUE
1280_4706	MRSA	TRUE	1	SCCmec_type_IVa(2B)	SCCmec_type_IVa(2B)	88.88	TRUE
1410895_3	MRSA	TRUE	1	SCCmec_type_IVa(2B)	SCCmec_type_IVa(2B)	89	TRUE
1280_3807	MRSA	TRUE	1	SCCmec_type_IVa(2B)	SCCmec_type_IVa(2B)	88.94	TRUE
1280_3918	MRSA	TRUE	1	SCCmec_type_IVa(2B)	SCCmec_type_IVa(2B)	88.87	TRUE
1280_4751	MRSA	TRUE	1	SCCmec_type_IVa(2B)	SCCmec_type_IVa(2B)	88.7	TRUE
1280_12344	MRSA	TRUE	1	SCCmec_type_IVa(2B)	SCCmec_type_IVa(2B)	88.81	TRUE
1280_28579	MSSA	FALSE	0			0	TRUE
1411557_3	MRSA	TRUE	1	SCCmec_type_IVa(2B)	SCCmec_type_IVa(2B)	88.45	TRUE
1280_16556	MRSA	TRUE	1	SCCmec_type_IVa(2B)	SCCmec_type_IVa(2B)	89	TRUE
1280_3830	MRSA	TRUE	1	SCCmec_type_IVa(2B)	SCCmec_type_IVa(2B)	89.05	TRUE
1280_27479	MRSA	TRUE	1	SCCmec_type_IVa(2B)	SCCmec_type_IVa(2B)	89.01	TRUE
1417204_3	MRSA	TRUE	1	SCCmec_type_IVa(2B)	SCCmec_type_IVa(2B)	88.83	TRUE
1280_8221	MSSA	FALSE	0			0	TRUE
553590_4	MRSA	TRUE	1	SCCmec_type_IVa(2B)	SCCmec_type_IVa(2B)	88.94	TRUE
1418345_3	MRSA	TRUE	1	SCCmec_type_IVa(2B)	SCCmec_type_IVa(2B)	88.8	TRUE
1410854_3	MRSA	TRUE	1	SCCmec_type_IVa(2B)	SCCmec_type_IVa(2B)	88.98	TRUE
1280_3990	MRSA	TRUE	1	SCCmec_type_IVa(2B)	SCCmec_type_IVa(2B)	87.71	TRUE
1280_17749	MSSA	FALSE	0			0	TRUE
1409520_3	MRSA	TRUE	1	SCCmec_type_IVa(2B)	SCCmec_type_IVa(2B)	88.93	TRUE
1280_4831	MSSA	FALSE	0			0	TRUE
904725_3	MSSA	FALSE	0			0	TRUE
1412793_3	MRSA	TRUE	1	SCCmec_type_IVa(2B)	SCCmec_type_IVa(2B)	89.03	TRUE
46170_168	MRSA	TRUE	1	SCCmec_type_IVc(2B)	SCCmec_type_IVc(2B)	93.72	TRUE
1280_3864	MRSA	TRUE	1	SCCmec_type_IVa(2B)	SCCmec_type_IVa(2B)	88.94	TRUE
1417209_3	MRSA	TRUE	1	SCCmec_type_IVa(2B)	SCCmec_type_IVa(2B)	88.43	TRUE
1280_3934	MRSA	TRUE	1	SCCmec_type_IVa(2B)	SCCmec_type_IVa(2B)	86.95	TRUE
1418303_3	MRSA	TRUE	1	SCCmec_type_IVa(2B)	SCCmec_type_IVa(2B)	88.74	TRUE
46170_592	MSSA	FALSE	0			0	TRUE
1418383_3	MRSA	TRUE	1	SCCmec_type_IVa(2B)	SCCmec_type_IVa(2B)	88.95	TRUE
1241616_3	MSSA	FALSE	0			0	TRUE
1280_4705	MRSA	TRUE	1	SCCmec_type_IVa(2B)	SCCmec_type_IVa(2B)	88.99	TRUE
1410896_3	MRSA	TRUE	1	SCCmec_type_IVa(2B)	SCCmec_type_IVa(2B)	88.94	TRUE
1280_16121	MRSA	TRUE	1	SCCmec_type_IVa(2B)	SCCmec_type_IVa(2B)	89	TRUE
1280_4965	MRSA	TRUE	1	SCCmec_type_IVa(2B)	SCCmec_type_IVa(2B)	88.88	TRUE
1280_13694	MRSA	TRUE	1	SCCmec_type_IVc(2B)	SCCmec_type_IVc(2B)	93.77	TRUE
1417051_3	MRSA	TRUE	1	SCCmec_type_IVa(2B)	SCCmec_type_IVa(2B)	88.95	TRUE
1280_25032	MRSA	TRUE	1	SCCmec_type_VI(4B)	SCCmec_type_VI(4B)	61.74	TRUE
1280_18653	MSSA	FALSE	0			0	TRUE
1280_4043	MRSA	TRUE	1	SCCmec_type_IVa(2B)	SCCmec_type_IVa(2B)	88.86	TRUE
1280_12559	MRSA	TRUE	1	SCCmec_type_IVa(2B)	SCCmec_type_IVa(2B)	88.79	TRUE
1280_4742	MRSA	TRUE	1	SCCmec_type_IVa(2B)	SCCmec_type_IVa(2B)	87.65	TRUE
1280_18584	MRSA	TRUE	Multiple	SCCmec_type_IV(2B)	SCCmec_type_II(2A)	51.57	FALSE
1280_16002	MSSA	FALSE	0			0	TRUE
1280_16077	MRSA	TRUE	1	SCCmec_type_IVa(2B)	SCCmec_type_IVa(2B)	88.75	TRUE
1409519_3	MRSA	TRUE	1	SCCmec_type_IVa(2B)	SCCmec_type_IVa(2B)	88.71	TRUE
1280_10014	MSSA	FALSE	0			0	TRUE
1280_3552	MSSA	FALSE	0			0	TRUE
1280_7273	MRSA	TRUE	1	SCCmec_type_IVa(2B)	SCCmec_type_IVa(2B)	88.88	TRUE
46170_341	MRSA	TRUE	1	SCCmec_type_IVa(2B)	SCCmec_type_IVa(2B)	88.91	TRUE
1417096_3	MRSA	TRUE	1	SCCmec_type_IVa(2B)	SCCmec_type_IVa(2B)	87.64	TRUE
1280_17758	MSSA	FALSE	0			0	TRUE
1412632_3	MRSA	TRUE	1	SCCmec_type_IVa(2B)	SCCmec_type_IVa(2B)	88.85	TRUE
1280_21782	MRSA	TRUE	1	SCCmec_type_IVa(2B)	SCCmec_type_IVa(2B)	89.06	TRUE
1409555_3	MRSA	TRUE	1	SCCmec_type_IVa(2B)	SCCmec_type_IVa(2B)	88.6	TRUE
1280_12235	MRSA	TRUE	1	SCCmec_type_IVa(2B)	SCCmec_type_IVa(2B)	88.86	TRUE
1412763_3	MRSA	TRUE	1	SCCmec_type_IVa(2B)	SCCmec_type_IVa(2B)	88.35	TRUE
1280_4369	MRSA	TRUE	1	SCCmec_type_IVa(2B)	SCCmec_type_IVa(2B)	88.88	TRUE
1409641_3	MRSA	TRUE	1	SCCmec_type_IVa(2B)	SCCmec_type_IVa(2B)	87.47	TRUE
1410730_3	MRSA	TRUE	Multiple	SCCmec_type_IVg(2B)	SCCmec_type_IVc(2B)	78.99	FALSE
1280_13695	MRSA	TRUE	1	SCCmec_type_IVc(2B)	SCCmec_type_IVc(2B)	93.87	TRUE
931457_3	MRSA	TRUE	1	SCCmec_type_II(2A)	SCCmec_type_II(2A)	54.53	TRUE
1412729_3	MRSA	TRUE	1	SCCmec_type_IVa(2B)	SCCmec_type_IVa(2B)	89.05	TRUE
1280_13669	MRSA	TRUE	1	SCCmec_type_IVc(2B)	SCCmec_type_IVc(2B)	93.47	TRUE
1280_4508	MSSA	FALSE	0			0	TRUE
46170_289	MSSA	FALSE	0			0	TRUE
1410799_3	MRSA	TRUE	1	SCCmec_type_IVa(2B)	SCCmec_type_IVa(2B)	88.78	TRUE
1409704_3	MRSA	TRUE	Multiple	SCCmec_type_IVg(2B)	SCCmec_type_IVc(2B)	79.12	FALSE
1280_2216	MRSA	TRUE	1	SCCmec_type_IVa(2B)	SCCmec_type_IVa(2B)	88.27	TRUE
1280_3377	MSSA	FALSE	0			0	TRUE
1417033_3	MRSA	TRUE	1	SCCmec_type_IVa(2B)	SCCmec_type_IVa(2B)	88.81	TRUE
1411533_3	MRSA	TRUE	1	SCCmec_type_IVa(2B)	SCCmec_type_IVa(2B)	88.61	TRUE
1280_16258	MRSA	TRUE	1	SCCmec_type_IVa(2B)	SCCmec_type_IVa(2B)	88.9	TRUE
1280_8655	MSSA	FALSE	0			0	TRUE
1280_4480	MSSA	FALSE	0			0	TRUE
1409689_3	MRSA	TRUE	1	SCCmec_type_IVa(2B)	SCCmec_type_IVa(2B)	88.69	TRUE
1280_26410	MSSA	FALSE	0			0	TRUE
1157000_3	MRSA	TRUE	Multiple	SCCmec_type_IV(2B)	SCCmec_type_IV(2B)	88.67	TRUE
1280_17912	MSSA	FALSE	0			0	TRUE
1280_28637	MRSA	TRUE	1	SCCmec_type_IVa(2B)	SCCmec_type_IVa(2B)	88.7	TRUE
1280_4343	MRSA	TRUE	1	SCCmec_type_IVa(2B)	SCCmec_type_IVa(2B)	88.93	TRUE
1418269_3	MRSA	TRUE	1	SCCmec_type_IVa(2B)	SCCmec_type_IVa(2B)	88.73	TRUE
1280_4417	MRSA	TRUE	1	SCCmec_type_IVa(2B)	SCCmec_type_IVa(2B)	88.83	TRUE
1280_8561	MSSA	FALSE	0			0	TRUE
1280_7435	MSSA	FALSE	0			0	TRUE
1418421_3	MRSA	TRUE	1	SCCmec_type_IVa(2B)	SCCmec_type_IVa(2B)	88.42	TRUE
1280_4952	MRSA	TRUE	1	SCCmec_type_IVa(2B)	SCCmec_type_IVa(2B)	89.02	TRUE
1280_18036	MSSA	FALSE	0			0	TRUE
1280_11682	MRSA	TRUE	1	SCCmec_type_IVa(2B)	SCCmec_type_IVa(2B)	89	TRUE
1280_4947	MRSA	TRUE	1	SCCmec_type_IVa(2B)	SCCmec_type_IVa(2B)	89.05	TRUE
1280_11690	MRSA	TRUE	1	SCCmec_type_IVa(2B)	SCCmec_type_IVa(2B)	89.06	TRUE
1280_17708	MSSA	FALSE	0			0	TRUE
1280_12389	MRSA	TRUE	1	SCCmec_type_IVa(2B)	SCCmec_type_IVa(2B)	88.84	TRUE
1280_4444	MRSA	TRUE	1	SCCmec_type_IVa(2B)	SCCmec_type_IVa(2B)	88.94	TRUE
1280_28557	MSSA	FALSE	0			0	TRUE
1280_12336	MRSA	TRUE	1	SCCmec_type_IVa(2B)	SCCmec_type_IVa(2B)	88.84	TRUE
1280_27470	MRSA	TRUE	1	SCCmec_type_IVa(2B)	SCCmec_type_IVa(2B)	88.82	TRUE
1280_4032	MRSA	TRUE	1	SCCmec_type_IVa(2B)	SCCmec_type_IVa(2B)	89	TRUE
1280_4042	MRSA	TRUE	1	SCCmec_type_IVa(2B)	SCCmec_type_IVa(2B)	88.06	TRUE
1280_4507	MRSA	TRUE	1	SCCmec_type_IVd(2B)	SCCmec_type_IVd(2B)	99.64	TRUE
1280_24280	MSSA	FALSE	0			0	TRUE
1412715_3	MRSA	TRUE	1	SCCmec_type_IVa(2B)	SCCmec_type_IVa(2B)	88.39	TRUE
1280_4539	MRSA	TRUE	1	SCCmec_type_IVa(2B)	SCCmec_type_IVa(2B)	87.78	TRUE
1280_4695	MRSA	TRUE	1	SCCmec_type_IVa(2B)	SCCmec_type_IVa(2B)	86.95	TRUE
1280_12516	MRSA	TRUE	1	SCCmec_type_IVa(2B)	SCCmec_type_IVa(2B)	88.93	TRUE
1409383_3	MRSA	TRUE	1	SCCmec_type_IVa(2B)	SCCmec_type_IVa(2B)	88.6	TRUE
1280_4441	MRSA	TRUE	1	SCCmec_type_IVa(2B)	SCCmec_type_IVa(2B)	89	TRUE
1280_21047	MRSA	TRUE	1	SCCmec_type_IVa(2B)	SCCmec_type_IVa(2B)	88.97	TRUE
1280_3622	MRSA	TRUE	1	SCCmec_type_IVa(2B)	SCCmec_type_IVa(2B)	89.02	TRUE
1280_3968	MRSA	TRUE	1	SCCmec_type_IVa(2B)	SCCmec_type_IVa(2B)	86.79	TRUE
1280_15999	MSSA	FALSE	0			0	TRUE
1280_28640	MRSA	TRUE	1	SCCmec_type_IVa(2B)	SCCmec_type_IVa(2B)	88.58	TRUE
1280_4054	MSSA	FALSE	0			0	TRUE
1421857_3	MRSA	TRUE	Multiple	SCCmec_type_IVg(2B)	SCCmec_type_IVc(2B)	76.96	FALSE
1280_3875	MRSA	TRUE	1	SCCmec_type_IVa(2B)	SCCmec_type_IVa(2B)	86.95	TRUE
1410762_3	MRSA	TRUE	1	SCCmec_type_IVa(2B)	SCCmec_type_IVa(2B)	89.06	TRUE
1280_13671	MRSA	TRUE	1	SCCmec_type_IVc(2B)	SCCmec_type_IVc(2B)	93.84	TRUE
1280_12507	MRSA	TRUE	1	SCCmec_type_IVa(2B)	SCCmec_type_IVa(2B)	88.79	TRUE
1417215_3	MRSA	TRUE	1	SCCmec_type_IVa(2B)	SCCmec_type_IVa(2B)	89	TRUE
1280_4656	MRSA	TRUE	1	SCCmec_type_IVa(2B)	SCCmec_type_IVa(2B)	88.82	TRUE
1418306_3	MRSA	TRUE	Multiple	SCCmec_type_IVg(2B)	SCCmec_type_IVc(2B)	79.92	FALSE
1411560_3	MRSA	TRUE	1	SCCmec_type_IVa(2B)	SCCmec_type_IVa(2B)	88.94	TRUE
1409648_3	MRSA	TRUE	1	SCCmec_type_IVa(2B)	SCCmec_type_IVa(2B)	87.59	TRUE
1280_27474	MRSA	TRUE	1	SCCmec_type_IVa(2B)	SCCmec_type_IVa(2B)	89.06	TRUE
1280_17821	MSSA	FALSE	0			0	TRUE
1280_3842	MRSA	TRUE	1	SCCmec_type_IVa(2B)	SCCmec_type_IVa(2B)	89	TRUE
1280_30788	MRSA	TRUE	1	SCCmec_type_IVa(2B)	SCCmec_type_IVa(2B)	88.89	TRUE
1280_16566	MRSA	TRUE	1	SCCmec_type_IVa(2B)	SCCmec_type_IVa(2B)	88.95	TRUE
1410758_3	MRSA	TRUE	1	SCCmec_type_IVa(2B)	SCCmec_type_IVa(2B)	88.86	TRUE
1280_21820	MRSA	TRUE	Multiple	SCCmec_type_IV(2B)	SCCmec_type_IV(2B)	95.61	TRUE
1280_27466	MRSA	TRUE	1	SCCmec_type_IVa(2B)	SCCmec_type_IVa(2B)	89.02	TRUE
1280_4778	MRSA	TRUE	1	SCCmec_type_IVa(2B)	SCCmec_type_IVa(2B)	88.98	TRUE
1280_27488	MRSA	TRUE	1	SCCmec_type_IVa(2B)	SCCmec_type_IVa(2B)	88.98	TRUE
1418357_3	MRSA	TRUE	1	SCCmec_type_IVa(2B)	SCCmec_type_IVa(2B)	88.98	TRUE
1280_4981	MSSA	FALSE	0			0	TRUE
1280_6066	MRSA	TRUE	1	SCCmec_type_IVa(2B)	SCCmec_type_IVa(2B)	88.88	TRUE
46170_248	MRSA	TRUE	1	SCCmec_type_IVa(2B)	SCCmec_type_IVa(2B)	88.86	TRUE
1409722_3	MRSA	TRUE	1	SCCmec_type_IVa(2B)	SCCmec_type_IVa(2B)	89.05	TRUE
1280_12290	MRSA	TRUE	1	SCCmec_type_IVa(2B)	SCCmec_type_IVa(2B)	88.6	TRUE
1280_3813	MRSA	TRUE	1	SCCmec_type_IVa(2B)	SCCmec_type_IVa(2B)	88.98	TRUE
1280_12502	MRSA	TRUE	1	SCCmec_type_IVa(2B)	SCCmec_type_IVa(2B)	88.8	TRUE
1280_24800	MRSA	TRUE	Multiple	SCCmec_type_IV(2B)	SCCmec_type_II(2A)	51.88	FALSE
1418294_3	MRSA	TRUE	1	SCCmec_type_IVa(2B)	SCCmec_type_IVa(2B)	88.98	TRUE
1280_3982	MRSA	TRUE	1	SCCmec_type_IVa(2B)	SCCmec_type_IVa(2B)	88.94	TRUE
46170_247	MRSA	TRUE	1	SCCmec_type_IVa(2B)	SCCmec_type_IVa(2B)	88.87	TRUE
1280_18507	MRSA	TRUE	1	SCCmec_type_IVa(2B)	SCCmec_type_IVa(2B)	88.86	TRUE
1280_4374	MSSA	FALSE	0			0	TRUE
1280_4474	MRSA	TRUE	1	SCCmec_type_IV(2B&5)	SCCmec_type_IV(2B&5)	70.71	TRUE
1280_4929	MSSA	FALSE	0			0	TRUE
1280_3623	MRSA	TRUE	1	SCCmec_type_IVc(2B)	SCCmec_type_IVc(2B)	93.84	TRUE
1409682_3	MRSA	TRUE	1	SCCmec_type_IVa(2B)	SCCmec_type_IVa(2B)	88.41	TRUE
1280_16590	MSSA	FALSE	0			0	TRUE
1418396_3	MRSA	TRUE	1	SCCmec_type_IVa(2B)	SCCmec_type_IVa(2B)	88.57	TRUE
1409647_3	MRSA	TRUE	1	SCCmec_type_IVa(2B)	SCCmec_type_IVa(2B)	88.72	TRUE
1280_4709	MRSA	TRUE	1	SCCmec_type_IVa(2B)	SCCmec_type_IVa(2B)	88.94	TRUE
1421884_3	MRSA	TRUE	1	SCCmec_type_IVa(2B)	SCCmec_type_IVa(2B)	88.73	TRUE
46170_365	MRSA	TRUE	1	SCCmec_type_IVa(2B)	SCCmec_type_IVa(2B)	87.29	TRUE
1409377_3	MRSA	TRUE	1	SCCmec_type_IVa(2B)	SCCmec_type_IVa(2B)	88.46	TRUE
1421873_3	MRSA	TRUE	1	SCCmec_type_IVa(2B)	SCCmec_type_IVa(2B)	88.42	TRUE
1280_4363	MRSA	TRUE	1	SCCmec_type_IVa(2B)	SCCmec_type_IVa(2B)	89	TRUE
1280_18620	MSSA	FALSE	0			0	TRUE
1412756_3	MRSA	TRUE	1	SCCmec_type_IVa(2B)	SCCmec_type_IVa(2B)	88.74	TRUE
1280_27473	MRSA	TRUE	1	SCCmec_type_IVa(2B)	SCCmec_type_IVa(2B)	89.09	TRUE
1280_27494	MRSA	TRUE	1	SCCmec_type_IVa(2B)	SCCmec_type_IVa(2B)	89	TRUE
1280_16415	MSSA	FALSE	0			0	TRUE
1409380_3	MRSA	TRUE	1	SCCmec_type_IVa(2B)	SCCmec_type_IVa(2B)	88.76	TRUE
1409742_3	MRSA	TRUE	Multiple	SCCmec_type_IV(2B)	SCCmec_type_II(2A)	50.03	FALSE
1280_4393	MRSA	TRUE	1	SCCmec_type_IVa(2B)	SCCmec_type_IVa(2B)	88.89	TRUE
1280_4379	MRSA	TRUE	1	SCCmec_type_IVa(2B)	SCCmec_type_IVa(2B)	88.62	TRUE
1280_10439	MRSA	TRUE	1	SCCmec_type_IVa(2B)	SCCmec_type_IVa(2B)	95.36	TRUE
1280_16004	MSSA	FALSE	0			0	TRUE
1280_4359	MSSA	FALSE	0			0	TRUE
1280_12479	MRSA	TRUE	1	SCCmec_type_IVa(2B)	SCCmec_type_IVa(2B)	88.95	TRUE
1280_4686	MRSA	TRUE	1	SCCmec_type_IVa(2B)	SCCmec_type_IVa(2B)	88.94	TRUE
1280_17981	MRSA	TRUE	1	SCCmec_type_IVc(2B)	SCCmec_type_IVc(2B)	93.7	TRUE
1409672_3	MRSA	TRUE	1	SCCmec_type_IVa(2B)	SCCmec_type_IVa(2B)	88.88	TRUE
1410879_3	MRSA	TRUE	1	SCCmec_type_IVa(2B)	SCCmec_type_IVa(2B)	88.4	TRUE
1280_11689	MRSA	TRUE	1	SCCmec_type_IVa(2B)	SCCmec_type_IVa(2B)	89	TRUE
1412797_3	MRSA	TRUE	1	SCCmec_type_IVa(2B)	SCCmec_type_IVa(2B)	87.62	TRUE
1280_26508	MRSA	TRUE	1	SCCmec_type_IVa(2B)	SCCmec_type_IVa(2B)	88.47	TRUE
1280_4477	MRSA	TRUE	Multiple	SCCmec_type_IVg(2B)	SCCmec_type_IVc(2B)	79.28	FALSE
1409430_3	MRSA	TRUE	Multiple	SCCmec_type_IVg(2B)	SCCmec_type_IVc(2B)	78.71	FALSE
1280_26002	MSSA	FALSE	0			0	TRUE
1280_4000	MRSA	TRUE	1	SCCmec_type_IVa(2B)	SCCmec_type_IVa(2B)	89	TRUE
1280_15931	MRSA	TRUE	1	SCCmec_type_IVa(2B)	SCCmec_type_IVa(2B)	88.48	TRUE
1280_4501	MSSA	FALSE	0			0	TRUE
1410795_3	MRSA	TRUE	1	SCCmec_type_IVa(2B)	SCCmec_type_IVa(2B)	88.98	TRUE
1280_17987	MRSA	TRUE	1	SCCmec_type_IVa(2B)	SCCmec_type_IVa(2B)	88.43	TRUE
1280_4800	MRSA	TRUE	1	SCCmec_type_IVa(2B)	SCCmec_type_IVa(2B)	91.22	TRUE
46170_566	MSSA	FALSE	0			0	TRUE
1280_9930	MSSA	FALSE	0			0	TRUE
1280_3960	MRSA	TRUE	1	SCCmec_type_IVa(2B)	SCCmec_type_IVa(2B)	88.94	TRUE
1409715_3	MRSA	TRUE	1	SCCmec_type_IVa(2B)	SCCmec_type_IVa(2B)	88.69	TRUE
1280_17979	MRSA	TRUE	1	SCCmec_type_IVb(2B)	SCCmec_type_IVb(2B)	96.61	TRUE
1280_14682	MRSA	TRUE	1	SCCmec_type_IVc(2B)	SCCmec_type_IVc(2B)	93.79	TRUE
1280_4418	MRSA	TRUE	1	SCCmec_type_IVa(2B)	SCCmec_type_IVa(2B)	89	TRUE
1280_11687	MRSA	TRUE	1	SCCmec_type_IVa(2B)	SCCmec_type_IVa(2B)	89	TRUE
1280_4446	MRSA	TRUE	1	SCCmec_type_IVa(2B)	SCCmec_type_IVa(2B)	88.7	TRUE
1280_12585	MRSA	TRUE	1	SCCmec_type_IVa(2B)	SCCmec_type_IVa(2B)	88.94	TRUE
1417077_3	MRSA	TRUE	1	SCCmec_type_IVa(2B)	SCCmec_type_IVa(2B)	88.77	TRUE
1280_12599	MSSA	FALSE	0			0	TRUE
1280_12517	MSSA	FALSE	0			0	TRUE
1280_12531	MRSA	TRUE	1	SCCmec_type_IVa(2B)	SCCmec_type_IVa(2B)	88.82	TRUE
1412802_3	MRSA	TRUE	1	SCCmec_type_IVa(2B)	SCCmec_type_IVa(2B)	88.82	TRUE
1280_3895	MRSA	TRUE	1	SCCmec_type_IVa(2B)	SCCmec_type_IVa(2B)	86.95	TRUE
1280_17947	MSSA	FALSE	0			0	TRUE
1280_3901	MRSA	TRUE	1	SCCmec_type_IVa(2B)	SCCmec_type_IVa(2B)	89.06	TRUE
1280_14675	MSSA	FALSE	0			0	TRUE
1418427_3	MRSA	TRUE	1	SCCmec_type_IVa(2B)	SCCmec_type_IVa(2B)	88.81	TRUE
46170_501	MRSA	TRUE	1	SCCmec_type_IVa(2B)	SCCmec_type_IVa(2B)	89.01	TRUE
1412762_3	MRSA	TRUE	1	SCCmec_type_IVa(2B)	SCCmec_type_IVa(2B)	88.59	TRUE
1411511_3	MRSA	TRUE	1	SCCmec_type_IVa(2B)	SCCmec_type_IVa(2B)	90	TRUE
1417122_3	MRSA	TRUE	1	SCCmec_type_IVa(2B)	SCCmec_type_IVa(2B)	89.04	TRUE
1410869_3	MRSA	TRUE	Multiple	SCCmec_type_IVg(2B)	SCCmec_type_IVc(2B)	79.64	FALSE
904737_3	MSSA	FALSE	0			0	TRUE
1280_4833	MSSA	FALSE	0			0	TRUE
1280_12296	MRSA	TRUE	1	SCCmec_type_IVa(2B)	SCCmec_type_IVa(2B)	88.88	TRUE
1280_4455	MRSA	TRUE	1	SCCmec_type_IVa(2B)	SCCmec_type_IVa(2B)	88.95	TRUE
1608877_4	MRSA	TRUE	1	SCCmec_type_IVa(2B)	SCCmec_type_IVa(2B)	88.63	TRUE
1280_4401	MSSA	FALSE	0			0	TRUE
1280_4653	MRSA	TRUE	1	SCCmec_type_IVa(2B)	SCCmec_type_IVa(2B)	88.09	TRUE
1412643_3	MRSA	TRUE	1	SCCmec_type_IVa(2B)	SCCmec_type_IVa(2B)	88.81	TRUE
1158683_3	MRSA	TRUE	Multiple	SCCmec_type_IVg(2B)	SCCmec_type_IVc(2B)	80.12	FALSE
1280_4717	MRSA	TRUE	1	SCCmec_type_IVa(2B)	SCCmec_type_IVa(2B)	88.88	TRUE
1280_4779	MRSA	TRUE	1	SCCmec_type_IVa(2B)	SCCmec_type_IVa(2B)	89.06	TRUE
1280_26407	MSSA	FALSE	0			0	TRUE
1280_4774	MRSA	TRUE	1	SCCmec_type_IVa(2B)	SCCmec_type_IVa(2B)	88.6	TRUE
1409711_3	MRSA	TRUE	1	SCCmec_type_IVa(2B)	SCCmec_type_IVa(2B)	91.07	TRUE
1280_18578	MRSA	TRUE	1	SCCmec_type_IVa(2B)	SCCmec_type_IVa(2B)	88.99	TRUE
1280_4771	MRSA	TRUE	1	SCCmec_type_IVa(2B)	SCCmec_type_IVa(2B)	88.88	TRUE
1280_12234	MRSA	TRUE	1	SCCmec_type_IVa(2B)	SCCmec_type_IVa(2B)	89.02	TRUE
1280_10045	MSSA	FALSE	0			0	TRUE
1608909_4	MSSA	FALSE	0			0	TRUE
1280_27468	MRSA	TRUE	1	SCCmec_type_IVa(2B)	SCCmec_type_IVa(2B)	89.06	TRUE
1280_2217	MRSA	TRUE	1	SCCmec_type_IVa(2B)	SCCmec_type_IVa(2B)	88.4	TRUE
1280_4467	MRSA	TRUE	1	SCCmec_type_IVa(2B)	SCCmec_type_IVa(2B)	88.94	TRUE
1280_4531	MRSA	TRUE	1	SCCmec_type_IVa(2B)	SCCmec_type_IVa(2B)	88.7	TRUE
46170_340	MRSA	TRUE	1	SCCmec_type_IVa(2B)	SCCmec_type_IVa(2B)	89	TRUE
1412810_3	MRSA	TRUE	1	SCCmec_type_IVa(2B)	SCCmec_type_IVa(2B)	88.74	TRUE
1417043_3	MRSA	TRUE	1	SCCmec_type_IVa(2B)	SCCmec_type_IVa(2B)	88.89	TRUE
1418317_3	MRSA	TRUE	1	SCCmec_type_IVa(2B)	SCCmec_type_IVa(2B)	89.05	TRUE
1421864_3	MRSA	TRUE	1	SCCmec_type_IVa(2B)	SCCmec_type_IVa(2B)	88.66	TRUE
1280_30827	MRSA	TRUE	1	SCCmec_type_IVa(2B)	SCCmec_type_IVa(2B)	88.96	TRUE
46170_339	MRSA	TRUE	1	SCCmec_type_IVa(2B)	SCCmec_type_IVa(2B)	88.88	TRUE
1410788_3	MRSA	TRUE	1	SCCmec_type_IVa(2B)	SCCmec_type_IVa(2B)	88.77	TRUE
46170_162	MRSA	TRUE	1	SCCmec_type_IVa(2B)	SCCmec_type_IVa(2B)	89.05	TRUE
1280_4420	MRSA	TRUE	1	SCCmec_type_IVa(2B)	SCCmec_type_IVa(2B)	88.95	TRUE
1280_3948	MRSA	TRUE	1	SCCmec_type_IVa(2B)	SCCmec_type_IVa(2B)	88.94	TRUE
1280_8541	MSSA	FALSE	0			0	TRUE
1417146_3	MRSA	TRUE	1	SCCmec_type_IVa(2B)	SCCmec_type_IVa(2B)	89.04	TRUE
1280_15930	MRSA	TRUE	1	SCCmec_type_IVa(2B)	SCCmec_type_IVa(2B)	88.37	TRUE
1280_3881	MSSA	FALSE	0			0	TRUE
1280_3919	MRSA	TRUE	1	SCCmec_type_IVa(2B)	SCCmec_type_IVa(2B)	88.73	TRUE
1280_4445	MSSA	FALSE	0			0	TRUE
1409556_3	MRSA	TRUE	1	SCCmec_type_IVa(2B)	SCCmec_type_IVa(2B)	88.88	TRUE
1280_23708	MSSA	FALSE	0			0	TRUE
1409484_3	MRSA	TRUE	1	SCCmec_type_IVa(2B)	SCCmec_type_IVa(2B)	88.48	TRUE
1417173_3	MRSA	TRUE	1	SCCmec_type_IVa(2B)	SCCmec_type_IVa(2B)	88.59	TRUE
1280_4532	MRSA	TRUE	Multiple	SCCmec_type_IVg(2B)	SCCmec_type_IVc(2B)	79.28	FALSE
1280_13715	MRSA	TRUE	1	SCCmec_type_IVa(2B)	SCCmec_type_IVa(2B)	88.72	TRUE
1280_12540	MRSA	TRUE	1	SCCmec_type_IVa(2B)	SCCmec_type_IVa(2B)	88.71	TRUE
1411509_3	MRSA	TRUE	1	SCCmec_type_IVa(2B)	SCCmec_type_IVa(2B)	88.65	TRUE
1280_4024	MRSA	TRUE	1	SCCmec_type_IVa(2B)	SCCmec_type_IVa(2B)	89	TRUE
1280_4954	MRSA	TRUE	1	SCCmec_type_IVa(2B)	SCCmec_type_IVa(2B)	88.99	TRUE
1280_4495	MRSA	TRUE	1	SCCmec_type_IVa(2B)	SCCmec_type_IVa(2B)	88.81	TRUE
1280_4512	MRSA	TRUE	1	SCCmec_type_IVa(2B)	SCCmec_type_IVa(2B)	88.61	TRUE
1280_9832	MRSA	TRUE	1	SCCmec_type_IVa(2B)	SCCmec_type_IVa(2B)	86.46	TRUE
46170_148	MRSA	TRUE	1	SCCmec_type_IVa(2B)	SCCmec_type_IVa(2B)	88.79	TRUE
1280_4479	MRSA	TRUE	1	SCCmec_type_IVa(2B)	SCCmec_type_IVa(2B)	88.84	TRUE
1409613_3	MRSA	TRUE	1	SCCmec_type_IVa(2B)	SCCmec_type_IVa(2B)	88.99	TRUE
1280_16135	MRSA	TRUE	1	SCCmec_type_IVa(2B)	SCCmec_type_IVa(2B)	88.93	TRUE
1280_4677	MRSA	TRUE	1	SCCmec_type_IVa(2B)	SCCmec_type_IVa(2B)	87.92	TRUE
1280_3619	MRSA	TRUE	1	SCCmec_type_IVa(2B)	SCCmec_type_IVa(2B)	88.09	TRUE
1409714_3	MRSA	TRUE	1	SCCmec_type_IVa(2B)	SCCmec_type_IVa(2B)	89.06	TRUE
1411570_3	MRSA	TRUE	1	SCCmec_type_IVa(2B)	SCCmec_type_IVa(2B)	89.03	TRUE
1280_21014	MSSA	FALSE	0			0	TRUE
1412672_3	MRSA	TRUE	1	SCCmec_type_IVa(2B)	SCCmec_type_IVa(2B)	88.48	TRUE
1280_25988	MSSA	FALSE	0			0	TRUE
1280_3814	MRSA	TRUE	1	SCCmec_type_IVa(2B)	SCCmec_type_IVa(2B)	88.82	TRUE
1409361_3	MRSA	TRUE	1	SCCmec_type_IVa(2B)	SCCmec_type_IVa(2B)	88.18	TRUE
1280_4520	MRSA	TRUE	1	SCCmec_type_IVa(2B)	SCCmec_type_IVa(2B)	86.95	TRUE
1280_16287	MRSA	TRUE	1	SCCmec_type_IVa(2B)	SCCmec_type_IVa(2B)	88.85	TRUE
46170_355	MRSA	TRUE	1	SCCmec_type_IVa(2B)	SCCmec_type_IVa(2B)	89.03	TRUE
1387327_3	MRSA	TRUE	1	SCCmec_type_IVa(2B)	SCCmec_type_IVa(2B)	89.05	TRUE
1280_13675	MRSA	TRUE	1	SCCmec_type_IVb(2B)	SCCmec_type_IVb(2B)	96.56	TRUE
1280_30823	MRSA	TRUE	1	SCCmec_type_IVa(2B)	SCCmec_type_IVa(2B)	88.88	TRUE
451516_9	MRSA	TRUE	1	SCCmec_type_IVa(2B)	SCCmec_type_IVa(2B)	89.06	TRUE
1280_3951	MRSA	TRUE	1	SCCmec_type_IVa(2B)	SCCmec_type_IVa(2B)	89	TRUE
1280_4434	MRSA	TRUE	1	SCCmec_type_IVa(2B)	SCCmec_type_IVa(2B)	88.82	TRUE
1158508_3	MRSA	TRUE	1	SCCmec_type_IVd(2B)	SCCmec_type_IVd(2B)	98.41	TRUE
1280_21046	MRSA	TRUE	1	SCCmec_type_IVb(2B)	SCCmec_type_IVb(2B)	99.85	TRUE
1280_3950	MRSA	TRUE	1	SCCmec_type_IVa(2B)	SCCmec_type_IVa(2B)	86.82	TRUE
1418364_3	MRSA	TRUE	1	SCCmec_type_IVa(2B)	SCCmec_type_IVa(2B)	88.94	TRUE
1280_4689	MRSA	TRUE	1	SCCmec_type_IVa(2B)	SCCmec_type_IVa(2B)	88.71	TRUE
1412690_3	MRSA	TRUE	1	SCCmec_type_IVa(2B)	SCCmec_type_IVa(2B)	89.06	TRUE
1280_3884	MRSA	TRUE	1	SCCmec_type_IVa(2B)	SCCmec_type_IVa(2B)	86.93	TRUE
1280_12239	MRSA	TRUE	1	SCCmec_type_IVa(2B)	SCCmec_type_IVa(2B)	89.05	TRUE
1280_3835	MRSA	TRUE	1	SCCmec_type_IVa(2B)	SCCmec_type_IVa(2B)	88.69	TRUE
1280_4698	MRSA	TRUE	1	SCCmec_type_IVa(2B)	SCCmec_type_IVa(2B)	88.62	TRUE
46170_564	MSSA	FALSE	0			0	TRUE
1280_27465	MRSA	TRUE	1	SCCmec_type_IVa(2B)	SCCmec_type_IVa(2B)	88.99	TRUE
1412633_3	MRSA	TRUE	1	SCCmec_type_IVa(2B)	SCCmec_type_IVa(2B)	88.88	TRUE
1280_23551	MSSA	FALSE	0			0	TRUE
1280_4468	MRSA	TRUE	1	SCCmec_type_IVa(2B)	SCCmec_type_IVa(2B)	89.06	TRUE
1280_12478	MRSA	TRUE	1	SCCmec_type_IVa(2B)	SCCmec_type_IVa(2B)	88.89	TRUE
1412713_3	MRSA	TRUE	1	SCCmec_type_IVa(2B)	SCCmec_type_IVa(2B)	88.62	TRUE
1409462_3	MRSA	TRUE	1	SCCmec_type_IVa(2B)	SCCmec_type_IVa(2B)	88.77	TRUE
1280_4920	MSSA	FALSE	0			0	TRUE
1280_21013	MSSA	FALSE	0			0	TRUE
1280_4668	MRSA	TRUE	1	SCCmec_type_IVa(2B)	SCCmec_type_IVa(2B)	86.95	TRUE
1280_4460	MRSA	TRUE	1	SCCmec_type_IVa(2B)	SCCmec_type_IVa(2B)	88.81	TRUE
1280_4362	MSSA	FALSE	0			0	TRUE
1280_4760	MRSA	TRUE	1	SCCmec_type_IVa(2B)	SCCmec_type_IVa(2B)	86.9	TRUE
1280_4396	MRSA	TRUE	1	SCCmec_type_IVa(2B)	SCCmec_type_IVa(2B)	89	TRUE
1409532_3	MRSA	TRUE	1	SCCmec_type_IVa(2B)	SCCmec_type_IVa(2B)	87.45	TRUE
1280_21629	MSSA	FALSE	0			0	TRUE
1409419_3	MRSA	TRUE	1	SCCmec_type_IVa(2B)	SCCmec_type_IVa(2B)	88.58	TRUE
1280_5204	MRSA	TRUE	1	SCCmec_type_IVa(2B)	SCCmec_type_IVa(2B)	89.05	TRUE
1280_3853	MRSA	TRUE	1	SCCmec_type_IVa(2B)	SCCmec_type_IVa(2B)	88.94	TRUE
1280_17774	MSSA	FALSE	0			0	TRUE
1418390_3	MRSA	TRUE	1	SCCmec_type_IVa(2B)	SCCmec_type_IVa(2B)	88.6	TRUE
1280_4449	MRSA	TRUE	1	SCCmec_type_IVa(2B)	SCCmec_type_IVa(2B)	88.93	TRUE
1418391_3	MRSA	TRUE	1	SCCmec_type_IVa(2B)	SCCmec_type_IVa(2B)	88.48	TRUE
1280_17984	MRSA	TRUE	1	SCCmec_type_IVc(2B)	SCCmec_type_IVc(2B)	93.73	TRUE
1280_14681	MRSA	TRUE	1	SCCmec_type_IVc(2B)	SCCmec_type_IVc(2B)	93.79	TRUE
1280_4448	MSSA	FALSE	0			0	TRUE
1409393_3	MRSA	TRUE	1	SCCmec_type_IVa(2B)	SCCmec_type_IVa(2B)	88.93	TRUE
1280_4057	MRSA	TRUE	1	SCCmec_type_IVa(2B)	SCCmec_type_IVa(2B)	86.88	TRUE
1280_12564	MRSA	TRUE	1	SCCmec_type_IVa(2B)	SCCmec_type_IVa(2B)	89.06	TRUE
1280_6131	MRSA	TRUE	Multiple	SCCmec_type_IVg(2B)	SCCmec_type_IVc(2B)	80.19	FALSE
1410900_3	MRSA	TRUE	1	SCCmec_type_IVa(2B)	SCCmec_type_IVa(2B)	88.88	TRUE
1280_4405	MRSA	TRUE	1	SCCmec_type_IVa(2B)	SCCmec_type_IVa(2B)	89	TRUE
1280_4050	MRSA	TRUE	1	SCCmec_type_IVa(2B)	SCCmec_type_IVa(2B)	88.93	TRUE
1280_3953	MRSA	TRUE	1	SCCmec_type_IVa(2B)	SCCmec_type_IVa(2B)	88.94	TRUE
1280_11666	MSSA	FALSE	0			0	TRUE
1280_4398	MSSA	FALSE	0			0	TRUE
1280_4759	MRSA	TRUE	1	SCCmec_type_IVa(2B)	SCCmec_type_IVa(2B)	86.91	TRUE
1280_4019	MRSA	TRUE	1	SCCmec_type_IVa(2B)	SCCmec_type_IVa(2B)	89	TRUE
1280_29070	MSSA	FALSE	0			0	TRUE
1412692_3	MRSA	TRUE	1	SCCmec_type_IVa(2B)	SCCmec_type_IVa(2B)	88.28	TRUE
1280_18577	MRSA	TRUE	1	SCCmec_type_IVa(2B)	SCCmec_type_IVa(2B)	89.05	TRUE
1421833_3	MRSA	TRUE	1	SCCmec_type_IVd(2B)	SCCmec_type_IVd(2B)	93.45	TRUE
1280_3955	MRSA	TRUE	1	SCCmec_type_IVa(2B)	SCCmec_type_IVa(2B)	86.95	TRUE
1280_4675	MRSA	TRUE	1	SCCmec_type_IVa(2B)	SCCmec_type_IVa(2B)	88.88	TRUE
1409654_3	MRSA	TRUE	Multiple	SCCmec_type_IV(2B)	SCCmec_type_II(2A)	50.07	FALSE
1280_3897	MRSA	TRUE	1	SCCmec_type_IVa(2B)	SCCmec_type_IVa(2B)	89	TRUE
1280_17691	MRSA	TRUE	1	SCCmec_type_IVa(2B)	SCCmec_type_IVa(2B)	89.09	TRUE
1409542_3	MRSA	TRUE	1	SCCmec_type_IVa(2B)	SCCmec_type_IVa(2B)	88.66	TRUE
1280_21785	MRSA	TRUE	1	SCCmec_type_IVa(2B)	SCCmec_type_IVa(2B)	88.86	TRUE
1280_10409	MRSA	TRUE	1	SCCmec_type_IVa(2B)	SCCmec_type_IVa(2B)	95.36	TRUE
1280_3896	MSSA	FALSE	0			0	TRUE
1410745_3	MRSA	TRUE	1	SCCmec_type_IVa(2B)	SCCmec_type_IVa(2B)	88.63	TRUE
1409408_3	MRSA	TRUE	1	SCCmec_type_IVa(2B)	SCCmec_type_IVa(2B)	88.68	TRUE
1280_21626	MSSA	FALSE	0			0	TRUE
1280_28602	MSSA	FALSE	0			0	TRUE
1280_4798	MRSA	TRUE	1	SCCmec_type_IVa(2B)	SCCmec_type_IVa(2B)	87.83	TRUE
1280_27616	MRSA	TRUE	Multiple	SCCmec_type_IVg(2B)	SCCmec_type_IVc(2B)	79.17	FALSE
1411555_3	MRSA	TRUE	1	SCCmec_type_IVa(2B)	SCCmec_type_IVa(2B)	88.63	TRUE
1409381_3	MRSA	TRUE	1	SCCmec_type_IVa(2B)	SCCmec_type_IVa(2B)	88.8	TRUE
1280_3928	MRSA	TRUE	1	SCCmec_type_IVa(2B)	SCCmec_type_IVa(2B)	86.82	TRUE
1280_9967	MSSA	FALSE	0			0	TRUE
1280_4062	MRSA	TRUE	1	SCCmec_type_IVa(2B)	SCCmec_type_IVa(2B)	87.95	TRUE
1280_3760	MSSA	FALSE	0			0	TRUE
1409446_3	MRSA	TRUE	1	SCCmec_type_IVa(2B)	SCCmec_type_IVa(2B)	89.05	TRUE
1409669_3	MRSA	TRUE	1	SCCmec_type_IVa(2B)	SCCmec_type_IVa(2B)	88.99	TRUE
1280_4513	MRSA	TRUE	1	SCCmec_type_IVa(2B)	SCCmec_type_IVa(2B)	89	TRUE
1280_12551	MRSA	TRUE	1	SCCmec_type_IVa(2B)	SCCmec_type_IVa(2B)	88.65	TRUE
1409384_3	MRSA	TRUE	1	SCCmec_type_IVa(2B)	SCCmec_type_IVa(2B)	88.85	TRUE
1280_4741	MSSA	FALSE	0			0	TRUE
1410002_3	MRSA	TRUE	1	SCCmec_type_IVa(2B)	SCCmec_type_IVa(2B)	83.21	TRUE
1409440_3	MRSA	TRUE	1	SCCmec_type_IVa(2B)	SCCmec_type_IVa(2B)	88.69	TRUE
1417196_3	MRSA	TRUE	1	SCCmec_type_IVa(2B)	SCCmec_type_IVa(2B)	88.73	TRUE
1280_27619	MRSA	TRUE	Multiple	SCCmec_type_IVg(2B)	SCCmec_type_IVc(2B)	79.17	FALSE
1280_16916	MRSA	TRUE	Multiple	SCCmec_type_VI(4B)	SCCmec_type_VIII(4A)	72.58	FALSE
1280_16003	MSSA	FALSE	0			0	TRUE
1418376_3	MRSA	TRUE	Multiple	SCCmec_type_IVg(2B)	SCCmec_type_IVc(2B)	78.11	FALSE
1418279_3	MRSA	TRUE	1	SCCmec_type_IVa(2B)	SCCmec_type_IVa(2B)	88.87	TRUE
1417056_3	MRSA	TRUE	1	SCCmec_type_IVa(2B)	SCCmec_type_IVa(2B)	88.91	TRUE
1280_4469	MRSA	TRUE	1	SCCmec_type_IVa(2B)	SCCmec_type_IVa(2B)	88.84	TRUE
46170_164	MRSA	TRUE	1	SCCmec_type_IVc(2B)	SCCmec_type_IVc(2B)	93.84	TRUE
1280_4533	MRSA	TRUE	1	SCCmec_type_IVa(2B)	SCCmec_type_IVa(2B)	87.69	TRUE
1280_4710	MRSA	TRUE	1	SCCmec_type_IVa(2B)	SCCmec_type_IVa(2B)	87.21	TRUE
1410703_3	MRSA	TRUE	1	SCCmec_type_IVa(2B)	SCCmec_type_IVa(2B)	88.78	TRUE
1223492_3	MSSA	FALSE	0			0	TRUE
1280_27496	MRSA	TRUE	1	SCCmec_type_IVa(2B)	SCCmec_type_IVa(2B)	89.06	TRUE
1280_25800	MSSA	FALSE	0			0	TRUE
1417036_3	MRSA	TRUE	1	SCCmec_type_IVa(2B)	SCCmec_type_IVa(2B)	87.26	TRUE
46170_139	MSSA	FALSE	0			0	TRUE
1410723_3	MRSA	TRUE	1	SCCmec_type_IVa(2B)	SCCmec_type_IVa(2B)	88.22	TRUE
1280_27487	MRSA	TRUE	1	SCCmec_type_IVa(2B)	SCCmec_type_IVa(2B)	88.95	TRUE
1280_4009	MRSA	TRUE	1	SCCmec_type_IVa(2B)	SCCmec_type_IVa(2B)	88.66	TRUE
1409543_3	MRSA	TRUE	1	SCCmec_type_IVa(2B)	SCCmec_type_IVa(2B)	87.45	TRUE
1418397_3	MRSA	TRUE	1	SCCmec_type_IVa(2B)	SCCmec_type_IVa(2B)	88.7	TRUE
1280_4699	MRSA	TRUE	1	SCCmec_type_IVa(2B)	SCCmec_type_IVa(2B)	88.85	TRUE
1280_4370	MSSA	FALSE	0			0	TRUE
1410742_3	MRSA	TRUE	1	SCCmec_type_IVa(2B)	SCCmec_type_IVa(2B)	88.66	TRUE
1280_4527	MRSA	TRUE	1	SCCmec_type_IVa(2B)	SCCmec_type_IVa(2B)	88.88	TRUE
1412785_3	MRSA	TRUE	1	SCCmec_type_IVa(2B)	SCCmec_type_IVa(2B)	88.68	TRUE
1280_16749	MRSA	TRUE	1	SCCmec_type_IVc(2B)	SCCmec_type_IVc(2B)	83.07	TRUE
1280_4514	MSSA	FALSE	0			0	TRUE
1280_11651	MSSA	FALSE	0			0	TRUE
1280_16551	MRSA	TRUE	1	SCCmec_type_IVa(2B)	SCCmec_type_IVa(2B)	89.06	TRUE
1280_24763	MRSA	TRUE	1	SCCmec_type_IVa(2B)	SCCmec_type_IVa(2B)	88.11	TRUE
1280_4389	MSSA	FALSE	0			0	TRUE
1280_3812	MRSA	TRUE	1	SCCmec_type_IVa(2B)	SCCmec_type_IVa(2B)	89.04	TRUE
1410768_3	MRSA	TRUE	Multiple	SCCmec_type_IVg(2B)	SCCmec_type_IVc(2B)	79.67	FALSE
1608871_4	MRSA	TRUE	1	SCCmec_type_IVa(2B)	SCCmec_type_IVa(2B)	86.78	TRUE
1280_4692	MRSA	TRUE	1	SCCmec_type_IVa(2B)	SCCmec_type_IVa(2B)	88.15	TRUE
1410688_3	MRSA	TRUE	1	SCCmec_type_IVa(2B)	SCCmec_type_IVa(2B)	88.84	TRUE
1280_4973	MSSA	FALSE	0			0	TRUE
1280_4826	MSSA	FALSE	0			0	TRUE
1280_17811	MRSA	TRUE	1	SCCmec_type_IVa(2B)	SCCmec_type_IVa(2B)	91.38	TRUE
1280_17733	MSSA	FALSE	0			0	TRUE
1412746_3	MRSA	TRUE	1	SCCmec_type_IVa(2B)	SCCmec_type_IVa(2B)	88.93	TRUE
1412649_3	MRSA	TRUE	1	SCCmec_type_IVa(2B)	SCCmec_type_IVa(2B)	88.6	TRUE
1280_4416	MRSA	TRUE	1	SCCmec_type_IVa(2B)	SCCmec_type_IVa(2B)	88.76	TRUE
1280_17838	MSSA	FALSE	0			0	TRUE
1280_4691	MRSA	TRUE	1	SCCmec_type_IVa(2B)	SCCmec_type_IVa(2B)	89	TRUE
1280_21615	MSSA	FALSE	0			0	TRUE
1280_4406	MRSA	TRUE	1	SCCmec_type_IVa(2B)	SCCmec_type_IVa(2B)	88.64	TRUE
1280_27492	MRSA	TRUE	1	SCCmec_type_IVa(2B)	SCCmec_type_IVa(2B)	88.95	TRUE
1280_12594	MRSA	TRUE	1	SCCmec_type_IVa(2B)	SCCmec_type_IVa(2B)	88.94	TRUE
1421909_3	MRSA	TRUE	1	SCCmec_type_IVa(2B)	SCCmec_type_IVa(2B)	88.81	TRUE
1410754_3	MRSA	TRUE	1	SCCmec_type_IVa(2B)	SCCmec_type_IVa(2B)	88.94	TRUE
1280_8136	MSSA	FALSE	0			0	TRUE
1280_4704	MRSA	TRUE	1	SCCmec_type_IVa(2B)	SCCmec_type_IVa(2B)	88.93	TRUE
1280_12568	MRSA	TRUE	1	SCCmec_type_IVa(2B)	SCCmec_type_IVa(2B)	88.87	TRUE
1418297_3	MRSA	TRUE	1	SCCmec_type_IVa(2B)	SCCmec_type_IVa(2B)	88.73	TRUE
1280_4500	MRSA	TRUE	1	SCCmec_type_IVa(2B)	SCCmec_type_IVa(2B)	88.28	TRUE
1417171_3	MRSA	TRUE	1	SCCmec_type_IVa(2B)	SCCmec_type_IVa(2B)	88.86	TRUE
1280_11654	MSSA	FALSE	0			0	TRUE
1280_4476	MSSA	FALSE	0			0	TRUE
1280_24927	MRSA	TRUE	1	SCCmec_type_IVa(2B)	SCCmec_type_IVa(2B)	88.14	TRUE
1280_3804	MRSA	TRUE	1	SCCmec_type_IVa(2B)	SCCmec_type_IVa(2B)	88.14	TRUE
1280_7258	MRSA	TRUE	1	SCCmec_type_IVd(2B)	SCCmec_type_IVd(2B)	93.21	TRUE
1417035_3	MRSA	TRUE	1	SCCmec_type_IVa(2B)	SCCmec_type_IVa(2B)	88.94	TRUE
1280_9977	MSSA	FALSE	0			0	TRUE
1280_29093	MRSA	TRUE	1	SCCmec_type_IVc(2B)	SCCmec_type_IVc(2B)	93.71	TRUE
1280_4497	MSSA	FALSE	0			0	TRUE
1280_3566	MRSA	TRUE	1	SCCmec_type_IVc(2B)	SCCmec_type_IVc(2B)	93.77	TRUE
1412804_3	MRSA	TRUE	1	SCCmec_type_IVa(2B)	SCCmec_type_IVa(2B)	88.69	TRUE
1410752_3	MRSA	TRUE	1	SCCmec_type_IVa(2B)	SCCmec_type_IVa(2B)	85.93	TRUE
1280_4720	MSSA	FALSE	0			0	TRUE
1280_3995	MRSA	TRUE	1	SCCmec_type_IVa(2B)	SCCmec_type_IVa(2B)	86.89	TRUE
1608888_3	MRSA	TRUE	1	SCCmec_type_IVa(2B)	SCCmec_type_IVa(2B)	87.56	TRUE
1280_4006	MRSA	TRUE	1	SCCmec_type_IVa(2B)	SCCmec_type_IVa(2B)	88.94	TRUE
1409572_3	MRSA	TRUE	Multiple	SCCmec_type_IVg(2B)	SCCmec_type_IVc(2B)	78.26	FALSE
1280_4663	MRSA	TRUE	Multiple	SCCmec_type_IVg(2B)	SCCmec_type_IVc(2B)	80.14	FALSE
1418337_3	MRSA	TRUE	1	SCCmec_type_IVa(2B)	SCCmec_type_IVa(2B)	88.8	TRUE
1409671_3	MRSA	TRUE	1	SCCmec_type_IVa(2B)	SCCmec_type_IVa(2B)	88.75	TRUE
1280_13692	MRSA	TRUE	1	SCCmec_type_IVc(2B)	SCCmec_type_IVc(2B)	93.77	TRUE
1280_4753	MRSA	TRUE	Multiple	SCCmec_type_IVg(2B)	SCCmec_type_IVc(2B)	78.74	FALSE
1417206_3	MRSA	TRUE	Multiple	SCCmec_type_IVg(2B)	SCCmec_type_IVc(2B)	79.92	FALSE
1280_16148	MRSA	TRUE	1	SCCmec_type_IVa(2B)	SCCmec_type_IVa(2B)	89.01	TRUE
1280_4049	MRSA	TRUE	1	SCCmec_type_IVa(2B)	SCCmec_type_IVa(2B)	88.98	TRUE
1280_4769	MRSA	TRUE	1	SCCmec_type_IVa(2B)	SCCmec_type_IVa(2B)	87.77	TRUE
1280_28651	MRSA	TRUE	1	SCCmec_type_IVa(2B)	SCCmec_type_IVa(2B)	89.05	TRUE
1418436_3	MRSA	TRUE	1	SCCmec_type_IVa(2B)	SCCmec_type_IVa(2B)	88.62	TRUE
1410877_3	MRSA	TRUE	1	SCCmec_type_IVa(2B)	SCCmec_type_IVa(2B)	88.72	TRUE
1280_3522	MSSA	FALSE	0			0	TRUE
1417086_3	MRSA	TRUE	1	SCCmec_type_IVa(2B)	SCCmec_type_IVa(2B)	88.75	TRUE
1280_29075	MSSA	FALSE	0			0	TRUE
1280_3602	MRSA	TRUE	1	SCCmec_type_IVb(2B)	SCCmec_type_IVb(2B)	99.47	TRUE
1280_11667	MSSA	FALSE	0			0	TRUE
1280_13690	MRSA	TRUE	1	SCCmec_type_IVc(2B)	SCCmec_type_IVc(2B)	93.83	TRUE
1280_4435	MRSA	TRUE	1	SCCmec_type_IVa(2B)	SCCmec_type_IVa(2B)	86.95	TRUE
1280_16266	MRSA	TRUE	1	SCCmec_type_IVa(2B)	SCCmec_type_IVa(2B)	88.87	TRUE
1411583_3	MRSA	TRUE	1	SCCmec_type_IVa(2B)	SCCmec_type_IVa(2B)	88.2	TRUE
1280_28561	MSSA	FALSE	0			0	TRUE
1280_4386	MSSA	FALSE	0			0	TRUE
1280_9805	MSSA	FALSE	0			0	TRUE
1280_30815	MRSA	TRUE	1	SCCmec_type_IVa(2B)	SCCmec_type_IVa(2B)	88.99	TRUE
1409474_3	MRSA	TRUE	1	SCCmec_type_IVa(2B)	SCCmec_type_IVa(2B)	88.93	TRUE
1280_4713	MRSA	TRUE	1	SCCmec_type_IVa(2B)	SCCmec_type_IVa(2B)	88.88	TRUE
1280_23603	MSSA	FALSE	0			0	TRUE
46170_567	MSSA	FALSE	0			0	TRUE
1280_9954	MSSA	FALSE	0			0	TRUE
1280_3524	MSSA	FALSE	0			0	TRUE
1410902_3	MRSA	TRUE	1	SCCmec_type_IVa(2B)	SCCmec_type_IVa(2B)	88.57	TRUE
1280_11674	MSSA	FALSE	0			0	TRUE
1418305_3	MRSA	TRUE	1	SCCmec_type_IVa(2B)	SCCmec_type_IVa(2B)	88.73	TRUE
1280_4738	MRSA	TRUE	1	SCCmec_type_IVa(2B)	SCCmec_type_IVa(2B)	86.95	TRUE
1280_13711	MRSA	TRUE	1	SCCmec_type_IVc(2B)	SCCmec_type_IVc(2B)	93.7	TRUE
46170_157	MRSA	TRUE	1	SCCmec_type_IVa(2B)	SCCmec_type_IVa(2B)	89.03	TRUE
1418353_3	MRSA	TRUE	1	SCCmec_type_IVa(2B)	SCCmec_type_IVa(2B)	89.05	TRUE
1280_4696	MRSA	TRUE	1	SCCmec_type_IVa(2B)	SCCmec_type_IVa(2B)	88.99	TRUE
1280_4544	MRSA	TRUE	1	SCCmec_type_IVa(2B)	SCCmec_type_IVa(2B)	88.82	TRUE
1409404_3	MRSA	TRUE	1	SCCmec_type_IVa(2B)	SCCmec_type_IVa(2B)	88.77	TRUE
1421849_3	MRSA	TRUE	1	SCCmec_type_IVa(2B)	SCCmec_type_IVa(2B)	88.56	TRUE
1280_4773	MRSA	TRUE	1	SCCmec_type_IVa(2B)	SCCmec_type_IVa(2B)	86.99	TRUE
1280_4366	MSSA	FALSE	0			0	TRUE
1280_16230	MRSA	TRUE	1	SCCmec_type_IVa(2B)	SCCmec_type_IVa(2B)	88.89	TRUE
1280_27486	MRSA	TRUE	1	SCCmec_type_IVa(2B)	SCCmec_type_IVa(2B)	89.15	TRUE
1410698_3	MRSA	TRUE	1	SCCmec_type_IVa(2B)	SCCmec_type_IVa(2B)	88.82	TRUE
1409537_3	MRSA	TRUE	1	SCCmec_type_IVa(2B)	SCCmec_type_IVa(2B)	89.01	TRUE
1280_26411	MSSA	FALSE	0			0	TRUE
1280_3945	MRSA	TRUE	1	SCCmec_type_IVa(2B)	SCCmec_type_IVa(2B)	88.7	TRUE
1280_4775	MRSA	TRUE	1	SCCmec_type_IVa(2B)	SCCmec_type_IVa(2B)	86.95	TRUE
46170_591	MSSA	FALSE	0			0	TRUE
1410787_3	MRSA	TRUE	1	SCCmec_type_IVa(2B)	SCCmec_type_IVa(2B)	87.56	TRUE
1280_21634	MSSA	FALSE	0			0	TRUE
1412652_3	MRSA	TRUE	1	SCCmec_type_IVa(2B)	SCCmec_type_IVa(2B)	89	TRUE
1280_3905	MRSA	TRUE	1	SCCmec_type_IVa(2B)	SCCmec_type_IVa(2B)	88.79	TRUE
1280_3883	MRSA	TRUE	1	SCCmec_type_IVa(2B)	SCCmec_type_IVa(2B)	88.94	TRUE
1280_17872	MSSA	FALSE	0			0	TRUE
1280_8460	MSSA	FALSE	0			0	TRUE
1280_14567	MRSA	TRUE	1	SCCmec_type_IVc(2B)	SCCmec_type_IVc(2B)	97.36	TRUE
1280_18511	MRSA	TRUE	1	SCCmec_type_IVa(2B)	SCCmec_type_IVa(2B)	88.97	TRUE
1280_3956	MRSA	TRUE	1	SCCmec_type_IVa(2B)	SCCmec_type_IVa(2B)	88.86	TRUE
1280_3876	MRSA	TRUE	1	SCCmec_type_IVa(2B)	SCCmec_type_IVa(2B)	88.37	TRUE
1280_27503	MRSA	TRUE	1	SCCmec_type_IVa(2B)	SCCmec_type_IVa(2B)	88.99	TRUE
1280_4471	MRSA	TRUE	1	SCCmec_type_IVa(2B)	SCCmec_type_IVa(2B)	87.55	TRUE
1280_27471	MRSA	TRUE	1	SCCmec_type_IVa(2B)	SCCmec_type_IVa(2B)	88.95	TRUE
1280_11643	MSSA	FALSE	0			0	TRUE
1280_3603	MRSA	TRUE	1	SCCmec_type_IVi(2B)	SCCmec_type_IVi(2B)	89.88	TRUE
1409706_3	MRSA	TRUE	1	SCCmec_type_IVa(2B)	SCCmec_type_IVa(2B)	88.92	TRUE
1409737_3	MRSA	TRUE	1	SCCmec_type_IVa(2B)	SCCmec_type_IVa(2B)	88.88	TRUE
1280_3836	MSSA	FALSE	0			0	TRUE
1280_17759	MSSA	FALSE	0			0	TRUE
1280_16636	MSSA	FALSE	0			0	TRUE
1280_4060	MRSA	TRUE	1	SCCmec_type_IVa(2B)	SCCmec_type_IVa(2B)	88.99	TRUE
1280_17895	MSSA	FALSE	0			0	TRUE
1417134_3	MRSA	TRUE	1	SCCmec_type_IVa(2B)	SCCmec_type_IVa(2B)	88.81	TRUE
1280_13689	MRSA	TRUE	1	SCCmec_type_IVc(2B)	SCCmec_type_IVc(2B)	93.84	TRUE
1280_15995	MRSA	TRUE	1	SCCmec_type_IVa(2B)	SCCmec_type_IVa(2B)	89.06	TRUE
1280_3877	MRSA	TRUE	1	SCCmec_type_IVa(2B)	SCCmec_type_IVa(2B)	88.74	TRUE
1280_4660	MRSA	TRUE	1	SCCmec_type_IVa(2B)	SCCmec_type_IVa(2B)	88.69	TRUE
1409738_3	MRSA	TRUE	1	SCCmec_type_IVa(2B)	SCCmec_type_IVa(2B)	88.82	TRUE
931433_3	MRSA	TRUE	1	SCCmec_type_IVd(2B)	SCCmec_type_IVd(2B)	99.77	TRUE
931448_3	MRSA	TRUE	1	SCCmec_type_IVd(2B)	SCCmec_type_IVd(2B)	99.55	TRUE
1280_16341	MRSA	TRUE	Multiple	SCCmec_type_IV(2B)	SCCmec_type_IV(2B)	95.56	TRUE
1280_12598	MRSA	TRUE	1	SCCmec_type_IVa(2B)	SCCmec_type_IVa(2B)	88.87	TRUE
1410767_3	MRSA	TRUE	1	SCCmec_type_IVa(2B)	SCCmec_type_IVa(2B)	88.8	TRUE
1280_4688	MRSA	TRUE	1	SCCmec_type_IVa(2B)	SCCmec_type_IVa(2B)	89	TRUE
46170_350	MRSA	TRUE	1	SCCmec_type_IVa(2B)	SCCmec_type_IVa(2B)	88.95	TRUE
1280_4372	MSSA	FALSE	0			0	TRUE
1280_26011	MSSA	FALSE	0			0	TRUE
1280_16311	MRSA	TRUE	1	SCCmec_type_IVa(2B)	SCCmec_type_IVa(2B)	89	TRUE
1268883_3	MRSA	TRUE	1	SCCmec_type_IVa(2B)	SCCmec_type_IVa(2B)	90.66	TRUE
1280_28617	MRSA	TRUE	1	SCCmec_type_IVa(2B)	SCCmec_type_IVa(2B)	95.28	TRUE
1280_18640	MSSA	FALSE	0			0	TRUE
1280_11681	MRSA	TRUE	1	SCCmec_type_IVa(2B)	SCCmec_type_IVa(2B)	89.06	TRUE
1280_27500	MRSA	TRUE	1	SCCmec_type_IVa(2B)	SCCmec_type_IVa(2B)	89	TRUE
1280_27504	MRSA	TRUE	1	SCCmec_type_IVa(2B)	SCCmec_type_IVa(2B)	89	TRUE
1388010_3	MSSA	FALSE	0			0	TRUE
1280_17988	MRSA	TRUE	1	SCCmec_type_IVa(2B)	SCCmec_type_IVa(2B)	88.47	TRUE
1280_17883	MSSA	FALSE	0			0	TRUE
1280_4034	MRSA	TRUE	1	SCCmec_type_IVa(2B)	SCCmec_type_IVa(2B)	87.81	TRUE
1412733_3	MRSA	TRUE	1	SCCmec_type_IVa(2B)	SCCmec_type_IVa(2B)	90.8	TRUE
1417184_3	MRSA	TRUE	1	SCCmec_type_IVa(2B)	SCCmec_type_IVa(2B)	88.69	TRUE
1418322_3	MRSA	TRUE	1	SCCmec_type_IVa(2B)	SCCmec_type_IVa(2B)	88.16	TRUE
1280_12236	MRSA	TRUE	1	SCCmec_type_IVa(2B)	SCCmec_type_IVa(2B)	88.79	TRUE
1280_10466	MSSA	FALSE	0			0	TRUE
1280_4509	MRSA	TRUE	1	SCCmec_type_IVa(2B)	SCCmec_type_IVa(2B)	88.88	TRUE
1280_12353	MSSA	FALSE	0			0	TRUE
1280_12492	MSSA	FALSE	0			0	TRUE
46170_125	MSSA	FALSE	0			0	TRUE
1421883_3	MRSA	TRUE	1	SCCmec_type_IVa(2B)	SCCmec_type_IVa(2B)	88.68	TRUE
1280_27482	MRSA	TRUE	1	SCCmec_type_IVa(2B)	SCCmec_type_IVa(2B)	88.83	TRUE
1280_8437	MSSA	FALSE	0			0	TRUE
1280_3907	MSSA	FALSE	0			0	TRUE
1280_12611	MRSA	TRUE	1	SCCmec_type_IVa(2B)	SCCmec_type_IVa(2B)	88.79	TRUE
1409727_3	MRSA	TRUE	1	SCCmec_type_IVa(2B)	SCCmec_type_IVa(2B)	88.86	TRUE
1421896_3	MRSA	TRUE	1	SCCmec_type_IVa(2B)	SCCmec_type_IVa(2B)	88.85	TRUE
1280_4683	MRSA	TRUE	1	SCCmec_type_IVa(2B)	SCCmec_type_IVa(2B)	88.88	TRUE
1280_4395	MRSA	TRUE	1	SCCmec_type_IVa(2B)	SCCmec_type_IVa(2B)	88.89	TRUE
1410755_3	MRSA	TRUE	1	SCCmec_type_IVa(2B)	SCCmec_type_IVa(2B)	88.58	TRUE
1280_3868	MRSA	TRUE	1	SCCmec_type_IVa(2B)	SCCmec_type_IVa(2B)	88.75	TRUE
1280_15939	MSSA	FALSE	0			0	TRUE
1421847_3	MRSA	TRUE	1	SCCmec_type_IVa(2B)	SCCmec_type_IVa(2B)	88.55	TRUE
1280_12487	MRSA	TRUE	1	SCCmec_type_IVa(2B)	SCCmec_type_IVa(2B)	88.72	TRUE
1280_17905	MSSA	FALSE	0			0	TRUE
1280_18114	MSSA	FALSE	0			0	TRUE
1280_8545	MSSA	FALSE	0			0	TRUE
1280_30859	MRSA	TRUE	1	SCCmec_type_IVa(2B)	SCCmec_type_IVa(2B)	88.93	TRUE
1280_3970	MRSA	TRUE	1	SCCmec_type_IVa(2B)	SCCmec_type_IVa(2B)	88.49	TRUE
1280_12410	MRSA	TRUE	1	SCCmec_type_IVa(2B)	SCCmec_type_IVa(2B)	88.79	TRUE
1280_4784	MRSA	TRUE	1	SCCmec_type_IVa(2B)	SCCmec_type_IVa(2B)	88.15	TRUE
1280_27493	MRSA	TRUE	1	SCCmec_type_IVa(2B)	SCCmec_type_IVa(2B)	88.99	TRUE
1280_3972	MRSA	TRUE	1	SCCmec_type_IVa(2B)	SCCmec_type_IVa(2B)	87.59	TRUE
1417160_3	MRSA	TRUE	1	SCCmec_type_IVa(2B)	SCCmec_type_IVa(2B)	88.46	TRUE
1280_15997	MRSA	TRUE	1	SCCmec_type_IVa(2B)	SCCmec_type_IVa(2B)	89.05	TRUE
1409695_3	MRSA	TRUE	1	SCCmec_type_IVa(2B)	SCCmec_type_IVa(2B)	88.46	TRUE
1411541_3	MRSA	TRUE	1	SCCmec_type_IVa(2B)	SCCmec_type_IVa(2B)	88.85	TRUE
1417214_3	MRSA	TRUE	1	SCCmec_type_IVa(2B)	SCCmec_type_IVa(2B)	88.78	TRUE
1280_11675	MRSA	TRUE	1	SCCmec_type_IVa(2B)	SCCmec_type_IVa(2B)	88.97	TRUE
1280_18571	MRSA	TRUE	1	SCCmec_type_IVa(2B)	SCCmec_type_IVa(2B)	89.02	TRUE
1280_17783	MSSA	FALSE	0			0	TRUE
1409587_3	MRSA	TRUE	1	SCCmec_type_IVa(2B)	SCCmec_type_IVa(2B)	88.38	TRUE
1280_4658	MRSA	TRUE	1	SCCmec_type_IVa(2B)	SCCmec_type_IVa(2B)	86.57	TRUE
1280_12493	MRSA	TRUE	1	SCCmec_type_IVa(2B)	SCCmec_type_IVa(2B)	88.99	TRUE
1410775_3	MRSA	TRUE	1	SCCmec_type_IVa(2B)	SCCmec_type_IVa(2B)	88.92	TRUE
1280_4415	MRSA	TRUE	1	SCCmec_type_IVa(2B)	SCCmec_type_IVa(2B)	88.8	TRUE
1409405_3	MRSA	TRUE	1	SCCmec_type_IVa(2B)	SCCmec_type_IVa(2B)	88.88	TRUE
1411554_3	MRSA	TRUE	1	SCCmec_type_IVa(2B)	SCCmec_type_IVa(2B)	88.86	TRUE
1280_4046	MRSA	TRUE	1	SCCmec_type_IVc(2B)	SCCmec_type_IVc(2B)	93.84	TRUE
1280_4777	MRSA	TRUE	1	SCCmec_type_IVa(2B)	SCCmec_type_IVa(2B)	87.4	TRUE
1280_10463	MSSA	FALSE	0			0	TRUE
1409653_3	MRSA	TRUE	1	SCCmec_type_IVa(2B)	SCCmec_type_IVa(2B)	88.15	TRUE
1409375_3	MRSA	TRUE	1	SCCmec_type_IVa(2B)	SCCmec_type_IVa(2B)	88.78	TRUE
1280_29086	MRSA	TRUE	1	SCCmec_type_IVa(2B)	SCCmec_type_IVa(2B)	89	TRUE
1410757_3	MRSA	TRUE	1	SCCmec_type_IVa(2B)	SCCmec_type_IVa(2B)	89.3	TRUE
1280_12394	MRSA	TRUE	1	SCCmec_type_IVa(2B)	SCCmec_type_IVa(2B)	88.59	TRUE
1409681_3	MRSA	TRUE	1	SCCmec_type_IVa(2B)	SCCmec_type_IVa(2B)	88.93	TRUE
46170_353	MRSA	TRUE	1	SCCmec_type_IVa(2B)	SCCmec_type_IVa(2B)	88.91	TRUE
1280_4960	MRSA	TRUE	1	SCCmec_type_IVa(2B)	SCCmec_type_IVa(2B)	89.06	TRUE
1280_27501	MRSA	TRUE	1	SCCmec_type_IVa(2B)	SCCmec_type_IVa(2B)	88.95	TRUE
1417186_3	MRSA	TRUE	1	SCCmec_type_IVa(2B)	SCCmec_type_IVa(2B)	88.83	TRUE
1280_3927	MRSA	TRUE	1	SCCmec_type_IVa(2B)	SCCmec_type_IVa(2B)	88.92	TRUE
1417207_3	MRSA	TRUE	1	SCCmec_type_IVa(2B)	SCCmec_type_IVa(2B)	88.81	TRUE
1280_4736	MSSA	FALSE	0			0	TRUE
1417055_3	MRSA	TRUE	1	SCCmec_type_IVa(2B)	SCCmec_type_IVa(2B)	88.71	TRUE
1280_3946	MRSA	TRUE	1	SCCmec_type_IVa(2B)	SCCmec_type_IVa(2B)	86.79	TRUE
1409728_3	MRSA	TRUE	1	SCCmec_type_IVa(2B)	SCCmec_type_IVa(2B)	88.8	TRUE
46170_169	MRSA	TRUE	1	SCCmec_type_IVc(2B)	SCCmec_type_IVc(2B)	93.94	TRUE
1280_18514	MRSA	TRUE	1	SCCmec_type_IVa(2B)	SCCmec_type_IVa(2B)	88.99	TRUE
1409584_3	MRSA	TRUE	1	SCCmec_type_IVa(2B)	SCCmec_type_IVa(2B)	85.86	TRUE
1280_13684	MRSA	TRUE	1	SCCmec_type_IVc(2B)	SCCmec_type_IVc(2B)	93.77	TRUE
1280_4712	MRSA	TRUE	1	SCCmec_type_IVa(2B)	SCCmec_type_IVa(2B)	87.81	TRUE
1280_11688	MRSA	TRUE	1	SCCmec_type_IVa(2B)	SCCmec_type_IVa(2B)	89	TRUE
1280_3993	MRSA	TRUE	1	SCCmec_type_IVa(2B)	SCCmec_type_IVa(2B)	87.81	TRUE
1409500_3	MRSA	TRUE	1	SCCmec_type_IVa(2B)	SCCmec_type_IVa(2B)	88.52	TRUE
1418352_3	MRSA	TRUE	1	SCCmec_type_IVa(2B)	SCCmec_type_IVa(2B)	89.06	TRUE
1417148_3	MRSA	TRUE	1	SCCmec_type_IVa(2B)	SCCmec_type_IVa(2B)	88.93	TRUE
1280_12513	MRSA	TRUE	1	SCCmec_type_IVa(2B)	SCCmec_type_IVa(2B)	88.93	TRUE
1280_4526	MRSA	TRUE	1	SCCmec_type_IVa(2B)	SCCmec_type_IVa(2B)	88.82	TRUE
1421870_3	MRSA	TRUE	1	SCCmec_type_IVd(2B)	SCCmec_type_IVd(2B)	97.59	TRUE
1280_30850	MRSA	TRUE	1	SCCmec_type_IVa(2B)	SCCmec_type_IVa(2B)	88.99	TRUE
1409716_3	MRSA	TRUE	1	SCCmec_type_IVa(2B)	SCCmec_type_IVa(2B)	89.05	TRUE
1418387_3	MRSA	TRUE	1	SCCmec_type_IVa(2B)	SCCmec_type_IVa(2B)	86.15	TRUE
1280_12474	MRSA	TRUE	1	SCCmec_type_IVa(2B)	SCCmec_type_IVa(2B)	88.53	TRUE
1280_4966	MRSA	TRUE	1	SCCmec_type_IVa(2B)	SCCmec_type_IVa(2B)	88.88	TRUE
1411549_3	MRSA	TRUE	1	SCCmec_type_IVa(2B)	SCCmec_type_IVa(2B)	88.68	TRUE
1280_12610	MRSA	TRUE	1	SCCmec_type_IVa(2B)	SCCmec_type_IVa(2B)	88.82	TRUE
46170_824	MSSA	FALSE	0			0	TRUE
1418328_3	MRSA	TRUE	1	SCCmec_type_IVa(2B)	SCCmec_type_IVa(2B)	88.72	TRUE
904740_3	MSSA	FALSE	0			0	TRUE
1280_17949	MSSA	FALSE	0			0	TRUE
1280_17753	MSSA	FALSE	0			0	TRUE
1280_4038	MRSA	TRUE	1	SCCmec_type_IVa(2B)	SCCmec_type_IVa(2B)	89.06	TRUE
1280_3902	MRSA	TRUE	1	SCCmec_type_IVa(2B)	SCCmec_type_IVa(2B)	89.06	TRUE
1410882_3	MRSA	TRUE	1	SCCmec_type_IVa(2B)	SCCmec_type_IVa(2B)	88.68	TRUE
1280_4964	MRSA	TRUE	1	SCCmec_type_IVa(2B)	SCCmec_type_IVa(2B)	88.94	TRUE
1280_4391	MRSA	TRUE	1	SCCmec_type_IVa(2B)	SCCmec_type_IVa(2B)	88.63	TRUE
1715049_3	MRSA	TRUE	1	SCCmec_type_IVa(2B)	SCCmec_type_IVa(2B)	87.45	TRUE
1280_3964	MRSA	TRUE	1	SCCmec_type_IVa(2B)	SCCmec_type_IVa(2B)	88.81	TRUE
46170_305	MRSA	TRUE	1	SCCmec_type_IVa(2B)	SCCmec_type_IVa(2B)	88.86	TRUE
1280_4522	MRSA	TRUE	1	SCCmec_type_IVa(2B)	SCCmec_type_IVa(2B)	88.75	TRUE
1280_4721	MSSA	FALSE	0			0	TRUE
1280_3866	MRSA	TRUE	1	SCCmec_type_IVa(2B)	SCCmec_type_IVa(2B)	89	TRUE
1280_8190	MSSA	FALSE	0			0	TRUE
1410883_3	MRSA	TRUE	1	SCCmec_type_IVd(2B)	SCCmec_type_IVd(2B)	93.32	TRUE
1412639_3	MRSA	TRUE	Multiple	SCCmec_type_IVg(2B)	SCCmec_type_IVc(2B)	79.5	FALSE
1608903_4	MRSA	TRUE	Multiple	SCCmec_type_IVg(2B)	SCCmec_type_IVc(2B)	79.41	FALSE
1280_17775	MSSA	FALSE	0			0	TRUE
46170_590	MSSA	FALSE	0			0	TRUE
93061_5	MSSA	FALSE	0			0	TRUE
1280_4411	MRSA	TRUE	1	SCCmec_type_IVa(2B)	SCCmec_type_IVa(2B)	89	TRUE
1412681_3	MRSA	TRUE	1	SCCmec_type_IVa(2B)	SCCmec_type_IVa(2B)	88.8	TRUE
1418414_3	MRSA	TRUE	1	SCCmec_type_IVa(2B)	SCCmec_type_IVa(2B)	89	TRUE
1280_8814	MSSA	FALSE	0			0	TRUE
1410824_3	MRSA	TRUE	1	SCCmec_type_IVa(2B)	SCCmec_type_IVa(2B)	88.4	TRUE
1412680_3	MRSA	TRUE	1	SCCmec_type_IVa(2B)	SCCmec_type_IVa(2B)	88.8	TRUE
1280_11657	MSSA	FALSE	0			0	TRUE
1412708_3	MRSA	TRUE	1	SCCmec_type_III(3A)	SCCmec_type_III(3A)	63.75	TRUE
1421845_3	MRSA	TRUE	1	SCCmec_type_IVa(2B)	SCCmec_type_IVa(2B)	88.66	TRUE
1280_4702	MRSA	TRUE	1	SCCmec_type_IVa(2B)	SCCmec_type_IVa(2B)	88.85	TRUE
1280_4780	MRSA	TRUE	1	SCCmec_type_IVa(2B)	SCCmec_type_IVa(2B)	87.82	TRUE
1409412_3	MRSA	TRUE	1	SCCmec_type_IVa(2B)	SCCmec_type_IVa(2B)	88.62	TRUE
1280_4941	MRSA	TRUE	1	SCCmec_type_IVa(2B)	SCCmec_type_IVa(2B)	88.88	TRUE
1280_28670	MRSA	TRUE	1	SCCmec_type_IVa(2B)	SCCmec_type_IVa(2B)	88.84	TRUE
1421887_3	MRSA	TRUE	1	SCCmec_type_IVa(2B)	SCCmec_type_IVa(2B)	88.55	TRUE
46170_165	MRSA	TRUE	1	SCCmec_type_IVc(2B)	SCCmec_type_IVc(2B)	93.94	TRUE
46170_177	MRSA	TRUE	1	SCCmec_type_IVc(2B)	SCCmec_type_IVc(2B)	93.86	TRUE
1409725_3	MRSA	TRUE	1	SCCmec_type_IVa(2B)	SCCmec_type_IVa(2B)	89.05	TRUE
1280_12324	MRSA	TRUE	1	SCCmec_type_IVa(2B)	SCCmec_type_IVa(2B)	88.85	TRUE
1417082_3	MRSA	TRUE	1	SCCmec_type_IVa(2B)	SCCmec_type_IVa(2B)	89.06	TRUE
1280_16129	MRSA	TRUE	1	SCCmec_type_IVc(2B)	SCCmec_type_IVc(2B)	93.8	TRUE
1280_4746	MRSA	TRUE	1	SCCmec_type_IVa(2B)	SCCmec_type_IVa(2B)	88.84	TRUE
1280_8803	MSSA	FALSE	0			0	TRUE
1280_16151	MRSA	TRUE	1	SCCmec_type_IVa(2B)	SCCmec_type_IVa(2B)	88.88	TRUE
1412671_3	MRSA	TRUE	1	SCCmec_type_IVa(2B)	SCCmec_type_IVa(2B)	88.66	TRUE
1280_12374	MRSA	TRUE	1	SCCmec_type_IVa(2B)	SCCmec_type_IVa(2B)	88.85	TRUE
1410890_3	MRSA	TRUE	1	SCCmec_type_IVa(2B)	SCCmec_type_IVa(2B)	88.63	TRUE
1388666_3	MRSA	TRUE	Multiple	SCCmec_type_IV(2B)	SCCmec_type_IV(2B)	92.77	TRUE
1418361_3	MRSA	TRUE	1	SCCmec_type_IVa(2B)	SCCmec_type_IVa(2B)	88.81	TRUE
1417059_3	MRSA	TRUE	1	SCCmec_type_IVa(2B)	SCCmec_type_IVa(2B)	88.94	TRUE
1280_9799	MSSA	FALSE	0			0	TRUE
1280_12580	MRSA	TRUE	1	SCCmec_type_IVa(2B)	SCCmec_type_IVa(2B)	88.98	TRUE
1412654_3	MRSA	TRUE	1	SCCmec_type_IVa(2B)	SCCmec_type_IVa(2B)	88.51	TRUE
1280_4697	MRSA	TRUE	1	SCCmec_type_IVa(2B)	SCCmec_type_IVa(2B)	88.92	TRUE
1417094_3	MRSA	TRUE	1	SCCmec_type_IVa(2B)	SCCmec_type_IVa(2B)	88.58	TRUE
1280_12340	MRSA	TRUE	1	SCCmec_type_IVa(2B)	SCCmec_type_IVa(2B)	89.05	TRUE
1280_12404	MRSA	TRUE	1	SCCmec_type_IVa(2B)	SCCmec_type_IVa(2B)	89	TRUE
1280_8138	MSSA	FALSE	0			0	TRUE
1280_3359	MRSA	TRUE	1	SCCmec_type_IVd(2B)	SCCmec_type_IVd(2B)	99.77	TRUE
1280_3621	MRSA	TRUE	1	SCCmec_type_IVa(2B)	SCCmec_type_IVa(2B)	88.78	TRUE
1280_4013	MRSA	TRUE	1	SCCmec_type_IVa(2B)	SCCmec_type_IVa(2B)	89.03	TRUE
1280_4408	MRSA	TRUE	1	SCCmec_type_IVa(2B)	SCCmec_type_IVa(2B)	88.43	TRUE
1410913_3	MRSA	TRUE	1	SCCmec_type_IVa(2B)	SCCmec_type_IVa(2B)	88.9	TRUE
1280_4375	MRSA	TRUE	1	SCCmec_type_IVa(2B)	SCCmec_type_IVa(2B)	88.11	TRUE
1280_4473	MSSA	FALSE	0			0	TRUE
1280_3869	MRSA	TRUE	1	SCCmec_type_IVa(2B)	SCCmec_type_IVa(2B)	86.93	TRUE
1280_4454	MRSA	TRUE	1	SCCmec_type_IVa(2B)	SCCmec_type_IVa(2B)	88.91	TRUE
46170_364	MRSA	TRUE	1	SCCmec_type_IVa(2B)	SCCmec_type_IVa(2B)	88.86	TRUE
1280_4747	MSSA	FALSE	0			0	TRUE
1280_27467	MRSA	TRUE	1	SCCmec_type_IVa(2B)	SCCmec_type_IVa(2B)	89	TRUE
46170_461	MSSA	FALSE	0			0	TRUE
1280_4766	MRSA	TRUE	1	SCCmec_type_IVa(2B)	SCCmec_type_IVa(2B)	88.57	TRUE
1280_25141	MRSA	TRUE	1	SCCmec_type_IVa(2B)	SCCmec_type_IVa(2B)	87.99	TRUE
1280_4511	MRSA	TRUE	1	SCCmec_type_IVa(2B)	SCCmec_type_IVa(2B)	88.95	TRUE
1412748_3	MRSA	TRUE	1	SCCmec_type_IVa(2B)	SCCmec_type_IVa(2B)	88.65	TRUE
1280_3888	MRSA	TRUE	1	SCCmec_type_IVa(2B)	SCCmec_type_IVa(2B)	88.93	TRUE
1421848_3	MRSA	TRUE	1	SCCmec_type_IVa(2B)	SCCmec_type_IVa(2B)	88.56	TRUE
1412764_3	MRSA	TRUE	1	SCCmec_type_IVa(2B)	SCCmec_type_IVa(2B)	88.85	TRUE
1280_27505	MRSA	TRUE	1	SCCmec_type_IVa(2B)	SCCmec_type_IVa(2B)	89.01	TRUE
1280_16210	MRSA	TRUE	1	SCCmec_type_IVa(2B)	SCCmec_type_IVa(2B)	88.86	TRUE
1280_8750	MSSA	FALSE	0			0	TRUE
1280_16001	MSSA	FALSE	0			0	TRUE
1280_4661	MRSA	TRUE	1	SCCmec_type_IVa(2B)	SCCmec_type_IVa(2B)	88.94	TRUE
1280_4044	MRSA	TRUE	1	SCCmec_type_IVa(2B)	SCCmec_type_IVa(2B)	88.87	TRUE
1280_4521	MRSA	TRUE	1	SCCmec_type_IVa(2B)	SCCmec_type_IVa(2B)	87.51	TRUE
1409782_3	MRSA	TRUE	1	SCCmec_type_IVa(2B)	SCCmec_type_IVa(2B)	88.53	TRUE
1280_4462	MRSA	TRUE	1	SCCmec_type_IVa(2B)	SCCmec_type_IVa(2B)	89.05	TRUE
46170_346	MRSA	TRUE	1	SCCmec_type_IVa(2B)	SCCmec_type_IVa(2B)	88.76	TRUE
46170_347	MRSA	TRUE	1	SCCmec_type_IVa(2B)	SCCmec_type_IVa(2B)	88.88	TRUE
1409529_3	MRSA	TRUE	1	SCCmec_type_IVa(2B)	SCCmec_type_IVa(2B)	89.06	TRUE
1411539_3	MRSA	TRUE	1	SCCmec_type_IVa(2B)	SCCmec_type_IVa(2B)	88.95	TRUE
1412809_3	MRSA	TRUE	1	SCCmec_type_IVa(2B)	SCCmec_type_IVa(2B)	88.25	TRUE
1280_4648	MRSA	TRUE	1	SCCmec_type_IVa(2B)	SCCmec_type_IVa(2B)	88.82	TRUE
1280_16128	MRSA	TRUE	1	SCCmec_type_IVc(2B)	SCCmec_type_IVc(2B)	93.87	TRUE
1280_4772	MRSA	TRUE	1	SCCmec_type_IVa(2B)	SCCmec_type_IVa(2B)	88.69	TRUE
1417161_3	MRSA	TRUE	1	SCCmec_type_IVa(2B)	SCCmec_type_IVa(2B)	88.88	TRUE
1280_11680	MRSA	TRUE	1	SCCmec_type_IVa(2B)	SCCmec_type_IVa(2B)	89	TRUE
1280_13683	MRSA	TRUE	1	SCCmec_type_IVc(2B)	SCCmec_type_IVc(2B)	93.84	TRUE
1409702_3	MRSA	TRUE	1	SCCmec_type_IVa(2B)	SCCmec_type_IVa(2B)	88.46	TRUE
1410712_3	MRSA	TRUE	1	SCCmec_type_IVa(2B)	SCCmec_type_IVa(2B)	88.71	TRUE
1410912_3	MRSA	TRUE	1	SCCmec_type_IVa(2B)	SCCmec_type_IVa(2B)	88.9	TRUE
1280_14678	MSSA	FALSE	0			0	TRUE
1280_12332	MRSA	TRUE	1	SCCmec_type_IVa(2B)	SCCmec_type_IVa(2B)	88.76	TRUE
1280_21676	MRSA	TRUE	1	SCCmec_type_IVa(2B)	SCCmec_type_IVa(2B)	89.02	TRUE
1417193_3	MRSA	TRUE	1	SCCmec_type_IVa(2B)	SCCmec_type_IVa(2B)	88.82	TRUE
1280_3574	MRSA	TRUE	1	SCCmec_type_IVc(2B)	SCCmec_type_IVc(2B)	93.87	TRUE
1409658_3	MRSA	TRUE	1	SCCmec_type_IVa(2B)	SCCmec_type_IVa(2B)	88.63	TRUE
1412697_3	MRSA	TRUE	1	SCCmec_type_IVa(2B)	SCCmec_type_IVa(2B)	88.78	TRUE
1280_4671	MRSA	TRUE	1	SCCmec_type_IVa(2B)	SCCmec_type_IVa(2B)	88.36	TRUE
1280_4033	MRSA	TRUE	1	SCCmec_type_IVa(2B)	SCCmec_type_IVa(2B)	88.94	TRUE
1280_21677	MRSA	TRUE	1	SCCmec_type_IVa(2B)	SCCmec_type_IVa(2B)	89.02	TRUE
1280_29071	MSSA	FALSE	0			0	TRUE
1280_4493	MRSA	TRUE	1	SCCmec_type_IVa(2B)	SCCmec_type_IVa(2B)	88.77	TRUE
1280_12319	MRSA	TRUE	1	SCCmec_type_IVa(2B)	SCCmec_type_IVa(2B)	88.97	TRUE
1280_4010	MRSA	TRUE	1	SCCmec_type_IVa(2B)	SCCmec_type_IVa(2B)	88.98	TRUE
1280_4002	MRSA	TRUE	1	SCCmec_type_IVa(2B)	SCCmec_type_IVa(2B)	88.92	TRUE
1418351_3	MRSA	TRUE	1	SCCmec_type_IVa(2B)	SCCmec_type_IVa(2B)	88.88	TRUE
1280_4928	MSSA	FALSE	0			0	TRUE
1280_12556	MRSA	TRUE	1	SCCmec_type_IVa(2B)	SCCmec_type_IVa(2B)	88.96	TRUE
1280_4487	MRSA	TRUE	1	SCCmec_type_IVa(2B)	SCCmec_type_IVa(2B)	88.87	TRUE
46170_156	MRSA	TRUE	1	SCCmec_type_IVa(2B)	SCCmec_type_IVa(2B)	88.89	TRUE
1421835_3	MRSA	TRUE	1	SCCmec_type_IVa(2B)	SCCmec_type_IVa(2B)	88.51	TRUE
1410744_3	MRSA	TRUE	1	SCCmec_type_IVa(2B)	SCCmec_type_IVa(2B)	88.81	TRUE
1409735_3	MRSA	TRUE	1	SCCmec_type_IVa(2B)	SCCmec_type_IVa(2B)	87.98	TRUE
1409566_3	MRSA	TRUE	1	SCCmec_type_IVa(2B)	SCCmec_type_IVa(2B)	88	TRUE
1280_4461	MRSA	TRUE	1	SCCmec_type_IVd(2B)	SCCmec_type_IVd(2B)	96.42	TRUE
1411601_3	MRSA	TRUE	1	SCCmec_type_IVa(2B)	SCCmec_type_IVa(2B)	88.35	TRUE
1411528_3	MRSA	TRUE	1	SCCmec_type_IVa(2B)	SCCmec_type_IVa(2B)	88.8	TRUE
1280_4739	MRSA	TRUE	1	SCCmec_type_IVa(2B)	SCCmec_type_IVa(2B)	86.88	TRUE
1417141_3	MRSA	TRUE	1	SCCmec_type_IVa(2B)	SCCmec_type_IVa(2B)	88.83	TRUE
1280_12385	MRSA	TRUE	1	SCCmec_type_IVa(2B)	SCCmec_type_IVa(2B)	88.94	TRUE
1280_4761	MSSA	FALSE	0			0	TRUE
1280_16308	MRSA	TRUE	1	SCCmec_type_IVa(2B)	SCCmec_type_IVa(2B)	88.95	TRUE
1280_4413	MRSA	TRUE	1	SCCmec_type_IVa(2B)	SCCmec_type_IVa(2B)	88.81	TRUE
1280_11683	MRSA	TRUE	1	SCCmec_type_IVa(2B)	SCCmec_type_IVa(2B)	89	TRUE
1280_12609	MRSA	TRUE	1	SCCmec_type_IVa(2B)	SCCmec_type_IVa(2B)	88.76	TRUE
1280_4429	MRSA	TRUE	1	SCCmec_type_IVa(2B)	SCCmec_type_IVa(2B)	87.98	TRUE
1280_16309	MRSA	TRUE	1	SCCmec_type_IVa(2B)	SCCmec_type_IVa(2B)	89.06	TRUE
1417120_3	MRSA	TRUE	1	SCCmec_type_IVa(2B)	SCCmec_type_IVa(2B)	88.48	TRUE
1409718_3	MRSA	TRUE	1	SCCmec_type_IVa(2B)	SCCmec_type_IVa(2B)	88.47	TRUE
1280_3940	MRSA	TRUE	1	SCCmec_type_IVa(2B)	SCCmec_type_IVa(2B)	91.22	TRUE
1409592_3	MRSA	TRUE	Multiple	SCCmec_type_IVg(2B)	SCCmec_type_IVc(2B)	79.29	FALSE
1409398_3	MRSA	TRUE	1	SCCmec_type_IVa(2B)	SCCmec_type_IVa(2B)	88.35	TRUE
1280_3932	MRSA	TRUE	1	SCCmec_type_IVa(2B)	SCCmec_type_IVa(2B)	88.77	TRUE
1280_7414	MSSA	FALSE	0			0	TRUE
46170_175	MRSA	TRUE	1	SCCmec_type_IVc(2B)	SCCmec_type_IVc(2B)	93.74	TRUE
1409534_3	MRSA	TRUE	1	SCCmec_type_IVa(2B)	SCCmec_type_IVa(2B)	87.44	TRUE
1421861_3	MRSA	TRUE	1	SCCmec_type_IVa(2B)	SCCmec_type_IVa(2B)	88.41	TRUE
1411559_3	MRSA	TRUE	1	SCCmec_type_IVa(2B)	SCCmec_type_IVa(2B)	88.49	TRUE
1280_8269	MSSA	FALSE	0			0	TRUE
1280_4387	MSSA	FALSE	0			0	TRUE
553594_3	MRSA	TRUE	1	SCCmec_type_IVd(2B)	SCCmec_type_IVd(2B)	98.05	TRUE
1410818_3	MRSA	TRUE	1	SCCmec_type_IVa(2B)	SCCmec_type_IVa(2B)	88.86	TRUE
1280_4992	MRSA	TRUE	1	SCCmec_type_IVa(2B)	SCCmec_type_IVa(2B)	88.95	TRUE
46170_174	MRSA	TRUE	1	SCCmec_type_IVa(2B)	SCCmec_type_IVa(2B)	89.06	TRUE
1412655_3	MRSA	TRUE	1	SCCmec_type_IVa(2B)	SCCmec_type_IVa(2B)	88.6	TRUE
1280_3922	MRSA	TRUE	1	SCCmec_type_IVa(2B)	SCCmec_type_IVa(2B)	88.14	TRUE
1280_2219	MRSA	TRUE	1	SCCmec_type_IVa(2B)	SCCmec_type_IVa(2B)	88.33	TRUE
1280_12541	MRSA	TRUE	1	SCCmec_type_IVa(2B)	SCCmec_type_IVa(2B)	88.6	TRUE
1280_4758	MRSA	TRUE	1	SCCmec_type_IVa(2B)	SCCmec_type_IVa(2B)	87.04	TRUE
1280_12427	MRSA	TRUE	1	SCCmec_type_IVa(2B)	SCCmec_type_IVa(2B)	88.76	TRUE
1417138_3	MRSA	TRUE	1	SCCmec_type_IVa(2B)	SCCmec_type_IVa(2B)	88.29	TRUE
1417041_3	MRSA	TRUE	1	SCCmec_type_IVa(2B)	SCCmec_type_IVa(2B)	88.71	TRUE
1417169_3	MRSA	TRUE	1	SCCmec_type_IVa(2B)	SCCmec_type_IVa(2B)	88.73	TRUE
1410837_3	MRSA	TRUE	1	SCCmec_type_IVa(2B)	SCCmec_type_IVa(2B)	88.66	TRUE
1409743_3	MRSA	TRUE	1	SCCmec_type_IVa(2B)	SCCmec_type_IVa(2B)	88.48	TRUE
1280_10872	MSSA	FALSE	0			0	TRUE
1280_4450	MRSA	TRUE	1	SCCmec_type_IVa(2B)	SCCmec_type_IVa(2B)	88.33	TRUE
1280_4439	MSSA	FALSE	0			0	TRUE
1280_19784	MRSA	TRUE	1	SCCmec_type_IVc(2B)	SCCmec_type_IVc(2B)	97.33	TRUE
1409515_3	MRSA	TRUE	1	SCCmec_type_IVa(2B)	SCCmec_type_IVa(2B)	88.62	TRUE
644279_4	MRSA	TRUE	1	SCCmec_type_IVc(2B)	SCCmec_type_IVc(2B)	82.95	TRUE
1417101_3	MRSA	TRUE	1	SCCmec_type_IVa(2B)	SCCmec_type_IVa(2B)	88.84	TRUE
1280_4470	MRSA	TRUE	1	SCCmec_type_IVa(2B)	SCCmec_type_IVa(2B)	89.01	TRUE
1280_3910	MRSA	TRUE	1	SCCmec_type_IVa(2B)	SCCmec_type_IVa(2B)	88.71	TRUE
1280_4781	MRSA	TRUE	1	SCCmec_type_IVa(2B)	SCCmec_type_IVa(2B)	88.29	TRUE
1280_4711	MRSA	TRUE	1	SCCmec_type_IVa(2B)	SCCmec_type_IVa(2B)	88.52	TRUE
1280_4364	MRSA	TRUE	1	SCCmec_type_IVa(2B)	SCCmec_type_IVa(2B)	88.7	TRUE
1418295_3	MRSA	TRUE	1	SCCmec_type_IVa(2B)	SCCmec_type_IVa(2B)	88.88	TRUE
1411530_3	MRSA	TRUE	1	SCCmec_type_IVa(2B)	SCCmec_type_IVa(2B)	89.09	TRUE
1280_4767	MRSA	TRUE	1	SCCmec_type_IVa(2B)	SCCmec_type_IVa(2B)	87.68	TRUE
1410820_3	MRSA	TRUE	1	SCCmec_type_IVa(2B)	SCCmec_type_IVa(2B)	88.93	TRUE
46170_1025	MSSA	FALSE	0			0	TRUE
1280_12491	MRSA	TRUE	1	SCCmec_type_IVa(2B)	SCCmec_type_IVa(2B)	88.93	TRUE
1280_4664	MRSA	TRUE	1	SCCmec_type_IVa(2B)	SCCmec_type_IVa(2B)	88.93	TRUE
1409667_3	MRSA	TRUE	1	SCCmec_type_IVa(2B)	SCCmec_type_IVa(2B)	88.82	TRUE
1280_4496	MSSA	FALSE	0			0	TRUE
1280_4061	MRSA	TRUE	1	SCCmec_type_IVa(2B)	SCCmec_type_IVa(2B)	89.06	TRUE
1280_4674	MRSA	TRUE	1	SCCmec_type_IVa(2B)	SCCmec_type_IVa(2B)	88.94	TRUE
1409505_3	MRSA	TRUE	1	SCCmec_type_IVa(2B)	SCCmec_type_IVa(2B)	88.93	TRUE
1409614_3	MRSA	TRUE	1	SCCmec_type_IVa(2B)	SCCmec_type_IVa(2B)	88.52	TRUE
543539_3	MRSA	TRUE	1	SCCmec_type_IVa(2B)	SCCmec_type_IVa(2B)	86.34	TRUE
1417106_3	MRSA	TRUE	Multiple	SCCmec_type_IVg(2B)	SCCmec_type_IVc(2B)	77.66	FALSE
1280_8407	MSSA	FALSE	0			0	TRUE
1280_4502	MRSA	TRUE	1	SCCmec_type_IVa(2B)	SCCmec_type_IVa(2B)	88.64	TRUE
1280_4654	MSSA	FALSE	0			0	TRUE
1280_4475	MRSA	TRUE	1	SCCmec_type_IVa(2B)	SCCmec_type_IVa(2B)	86.89	TRUE
1280_4419	MRSA	TRUE	1	SCCmec_type_IVa(2B)	SCCmec_type_IVa(2B)	87.81	TRUE
1412673_3	MRSA	TRUE	Multiple	SCCmec_type_IVg(2B)	SCCmec_type_IVc(2B)	79.65	FALSE
1280_4045	MRSA	TRUE	1	SCCmec_type_IVa(2B)	SCCmec_type_IVa(2B)	91.32	TRUE
1280_4023	MRSA	TRUE	1	SCCmec_type_IVa(2B)	SCCmec_type_IVa(2B)	86.95	TRUE
1280_4783	MRSA	TRUE	1	SCCmec_type_IVa(2B)	SCCmec_type_IVa(2B)	88.78	TRUE
1280_4492	MRSA	TRUE	1	SCCmec_type_IVa(2B)	SCCmec_type_IVa(2B)	88.94	TRUE
1280_4733	MRSA	TRUE	1	SCCmec_type_IVa(2B)	SCCmec_type_IVa(2B)	88.96	TRUE
1412704_3	MRSA	TRUE	1	SCCmec_type_IVa(2B)	SCCmec_type_IVa(2B)	88.97	TRUE
1280_3967	MRSA	TRUE	1	SCCmec_type_IVa(2B)	SCCmec_type_IVa(2B)	88.79	TRUE
1412665_3	MRSA	TRUE	1	SCCmec_type_IVa(2B)	SCCmec_type_IVa(2B)	88.52	TRUE
1409602_3	MRSA	TRUE	1	SCCmec_type_IVa(2B)	SCCmec_type_IVa(2B)	88.81	TRUE
1410684_3	MRSA	TRUE	Multiple	SCCmec_type_IVg(2B)	SCCmec_type_IVc(2B)	78.77	FALSE
1280_3717	MRSA	TRUE	1	SCCmec_type_IVa(2B)	SCCmec_type_IVa(2B)	88.12	TRUE
1280_4972	MSSA	FALSE	0			0	TRUE
1417202_3	MRSA	TRUE	1	SCCmec_type_IVa(2B)	SCCmec_type_IVa(2B)	88.58	TRUE
1280_4835	MSSA	FALSE	0			0	TRUE
1417153_3	MRSA	TRUE	1	SCCmec_type_IVa(2B)	SCCmec_type_IVa(2B)	88.75	TRUE
1421863_3	MRSA	TRUE	1	SCCmec_type_IVa(2B)	SCCmec_type_IVa(2B)	87.06	TRUE
1280_23614	MSSA	FALSE	0			0	TRUE
1410857_3	MRSA	TRUE	1	SCCmec_type_IVa(2B)	SCCmec_type_IVa(2B)	88.72	TRUE
1280_13679	MRSA	TRUE	1	SCCmec_type_IVc(2B)	SCCmec_type_IVc(2B)	93.84	TRUE
1280_16761	MRSA	TRUE	1	SCCmec_type_IVd(2B)	SCCmec_type_IVd(2B)	99.74	TRUE
1421888_3	MRSA	TRUE	1	SCCmec_type_IVa(2B)	SCCmec_type_IVa(2B)	88.38	TRUE
1280_4770	MRSA	TRUE	1	SCCmec_type_IVa(2B)	SCCmec_type_IVa(2B)	88.87	TRUE
1280_3900	MRSA	TRUE	1	SCCmec_type_IVa(2B)	SCCmec_type_IVa(2B)	88.17	TRUE
1418385_3	MRSA	TRUE	1	SCCmec_type_IVa(2B)	SCCmec_type_IVa(2B)	88.92	TRUE
1280_11676	MRSA	TRUE	1	SCCmec_type_IVa(2B)	SCCmec_type_IVa(2B)	88.97	TRUE
1280_3821	MRSA	TRUE	1	SCCmec_type_IVa(2B)	SCCmec_type_IVa(2B)	87.21	TRUE
1280_4400	MSSA	FALSE	0			0	TRUE
1280_12544	MRSA	TRUE	1	SCCmec_type_IVa(2B)	SCCmec_type_IVa(2B)	88.77	TRUE
1280_4377	MRSA	TRUE	1	SCCmec_type_IVa(2B)	SCCmec_type_IVa(2B)	88.91	TRUE
1280_12343	MRSA	TRUE	1	SCCmec_type_IVa(2B)	SCCmec_type_IVa(2B)	88.88	TRUE
1280_3914	MRSA	TRUE	1	SCCmec_type_IVa(2B)	SCCmec_type_IVa(2B)	88.88	TRUE
1280_18639	MRSA	TRUE	1	SCCmec_type_IVc(2B)	SCCmec_type_IVc(2B)	93.48	TRUE
1412657_3	MRSA	TRUE	1	SCCmec_type_IVa(2B)	SCCmec_type_IVa(2B)	88.84	TRUE
1280_17773	MSSA	FALSE	0			0	TRUE
1280_3977	MRSA	TRUE	1	SCCmec_type_IVa(2B)	SCCmec_type_IVa(2B)	86.96	TRUE
46170_178	MRSA	TRUE	1	SCCmec_type_IVc(2B)	SCCmec_type_IVc(2B)	93.86	TRUE
1280_9976	MSSA	FALSE	0			0	TRUE
1280_27506	MRSA	TRUE	1	SCCmec_type_IVa(2B)	SCCmec_type_IVa(2B)	89.06	TRUE
1280_4378	MRSA	TRUE	1	SCCmec_type_IVa(2B)	SCCmec_type_IVa(2B)	89.06	TRUE
1280_17873	MSSA	FALSE	0			0	TRUE
1280_12363	MRSA	TRUE	1	SCCmec_type_IVa(2B)	SCCmec_type_IVa(2B)	88.66	TRUE
1280_12365	MRSA	TRUE	1	SCCmec_type_IVa(2B)	SCCmec_type_IVa(2B)	88.64	TRUE
1280_4340	MRSA	TRUE	1	SCCmec_type_IVa(2B)	SCCmec_type_IVa(2B)	89	TRUE
1280_4685	MSSA	FALSE	0			0	TRUE
1280_10459	MRSA	TRUE	1	SCCmec_type_IVd(2B)	SCCmec_type_IVd(2B)	99.49	TRUE
1280_17967	MSSA	FALSE	0			0	TRUE
1280_4728	MRSA	TRUE	1	SCCmec_type_IVa(2B)	SCCmec_type_IVa(2B)	88.94	TRUE
1280_11679	MRSA	TRUE	1	SCCmec_type_IVa(2B)	SCCmec_type_IVa(2B)	88.94	TRUE
1280_21784	MRSA	TRUE	1	SCCmec_type_IVa(2B)	SCCmec_type_IVa(2B)	88.86	TRUE
1280_27497	MRSA	TRUE	1	SCCmec_type_IVa(2B)	SCCmec_type_IVa(2B)	89.04	TRUE
1280_4990	MRSA	TRUE	1	SCCmec_type_IVa(2B)	SCCmec_type_IVa(2B)	88.93	TRUE
1417216_3	MRSA	TRUE	1	SCCmec_type_IVa(2B)	SCCmec_type_IVa(2B)	88.85	TRUE
1280_28646	MRSA	TRUE	1	SCCmec_type_IVa(2B)	SCCmec_type_IVa(2B)	89.05	TRUE
1280_4431	MRSA	TRUE	Multiple	SCCmec_type_IVg(2B)	SCCmec_type_IVc(2B)	79.21	FALSE
1280_12291	MRSA	TRUE	1	SCCmec_type_IVa(2B)	SCCmec_type_IVa(2B)	88.97	TRUE
46170_356	MRSA	TRUE	1	SCCmec_type_IVa(2B)	SCCmec_type_IVa(2B)	88.91	TRUE
1410718_3	MRSA	TRUE	1	SCCmec_type_IVa(2B)	SCCmec_type_IVa(2B)	88.19	TRUE
1280_15933	MSSA	FALSE	0			0	TRUE
1280_4489	MRSA	TRUE	1	SCCmec_type_IVa(2B)	SCCmec_type_IVa(2B)	88.88	TRUE
1280_4724	MRSA	TRUE	1	SCCmec_type_IVa(2B)	SCCmec_type_IVa(2B)	87	TRUE
1410878_3	MRSA	TRUE	1	SCCmec_type_IVa(2B)	SCCmec_type_IVa(2B)	88.66	TRUE
1280_3811	MRSA	TRUE	1	SCCmec_type_IVa(2B)	SCCmec_type_IVa(2B)	87.39	TRUE
1280_4438	MRSA	TRUE	1	SCCmec_type_IVa(2B)	SCCmec_type_IVa(2B)	88.85	TRUE
1410776_3	MRSA	TRUE	1	SCCmec_type_IVa(2B)	SCCmec_type_IVa(2B)	88.6	TRUE
1417092_3	MRSA	TRUE	1	SCCmec_type_IVa(2B)	SCCmec_type_IVa(2B)	88.73	TRUE
1280_4365	MSSA	FALSE	0			0	TRUE
1417197_3	MRSA	TRUE	1	SCCmec_type_IVa(2B)	SCCmec_type_IVa(2B)	88.41	TRUE
1409396_3	MRSA	TRUE	1	SCCmec_type_IVa(2B)	SCCmec_type_IVa(2B)	87.44	TRUE
1388667_3	MRSA	TRUE	Multiple	SCCmec_type_IV(2B)	SCCmec_type_IV(2B)	91.87	TRUE
1280_17980	MRSA	TRUE	1	SCCmec_type_IVa(2B)	SCCmec_type_IVa(2B)	88.35	TRUE
1412742_3	MRSA	TRUE	1	SCCmec_type_IVa(2B)	SCCmec_type_IVa(2B)	88.73	TRUE
1409512_3	MRSA	TRUE	1	SCCmec_type_IVa(2B)	SCCmec_type_IVa(2B)	88.89	TRUE
1417166_3	MRSA	TRUE	1	SCCmec_type_IVa(2B)	SCCmec_type_IVa(2B)	88.88	TRUE
1280_3620	MRSA	TRUE	1	SCCmec_type_IVa(2B)	SCCmec_type_IVa(2B)	87.82	TRUE
1409526_3	MRSA	TRUE	1	SCCmec_type_IVa(2B)	SCCmec_type_IVa(2B)	89.01	TRUE
46170_345	MRSA	TRUE	1	SCCmec_type_IVa(2B)	SCCmec_type_IVa(2B)	89	TRUE
1417103_3	MRSA	TRUE	1	SCCmec_type_IVa(2B)	SCCmec_type_IVa(2B)	87.83	TRUE
1157003_3	MRSA	TRUE	1	SCCmec_type_IVa(2B)	SCCmec_type_IVa(2B)	89.06	TRUE
1410690_3	MRSA	TRUE	1	SCCmec_type_IVa(2B)	SCCmec_type_IVa(2B)	89	TRUE
1280_4058	MRSA	TRUE	1	SCCmec_type_IVa(2B)	SCCmec_type_IVa(2B)	89	TRUE
1412659_3	MRSA	TRUE	Multiple	SCCmec_type_IVg(2B)	SCCmec_type_IVc(2B)	78.94	FALSE
1409420_3	MRSA	TRUE	1	SCCmec_type_IVa(2B)	SCCmec_type_IVa(2B)	89.05	TRUE
1280_12295	MRSA	TRUE	1	SCCmec_type_IVa(2B)	SCCmec_type_IVa(2B)	88.94	TRUE
1409524_3	MRSA	TRUE	1	SCCmec_type_IVa(2B)	SCCmec_type_IVa(2B)	88.8	TRUE
1280_4422	MRSA	TRUE	1	SCCmec_type_IVa(2B)	SCCmec_type_IVa(2B)	88.51	TRUE
1280_3947	MRSA	TRUE	1	SCCmec_type_IVa(2B)	SCCmec_type_IVa(2B)	89.06	TRUE
1409622_3	MRSA	TRUE	1	SCCmec_type_IVa(2B)	SCCmec_type_IVa(2B)	88.91	TRUE
1418342_3	MRSA	TRUE	1	SCCmec_type_IVa(2B)	SCCmec_type_IVa(2B)	88.54	TRUE
1409724_3	MRSA	TRUE	1	SCCmec_type_IVa(2B)	SCCmec_type_IVa(2B)	88.94	TRUE
1417143_3	MRSA	TRUE	1	SCCmec_type_IVa(2B)	SCCmec_type_IVa(2B)	88.75	TRUE
1280_12457	MRSA	TRUE	1	SCCmec_type_IVa(2B)	SCCmec_type_IVa(2B)	88.89	TRUE
1280_8535	MSSA	FALSE	0			0	TRUE
1411564_3	MRSA	TRUE	1	SCCmec_type_IVa(2B)	SCCmec_type_IVa(2B)	88.75	TRUE
1412725_3	MRSA	TRUE	1	SCCmec_type_IVa(2B)	SCCmec_type_IVa(2B)	89	TRUE
1280_3839	MRSA	TRUE	1	SCCmec_type_IVa(2B)	SCCmec_type_IVa(2B)	88.93	TRUE
1280_11678	MRSA	TRUE	1	SCCmec_type_IVa(2B)	SCCmec_type_IVa(2B)	89.05	TRUE
1280_4524	MSSA	FALSE	0			0	TRUE
1412799_3	MRSA	TRUE	1	SCCmec_type_IVa(2B)	SCCmec_type_IVa(2B)	88.08	TRUE
1410859_3	MRSA	TRUE	1	SCCmec_type_IVa(2B)	SCCmec_type_IVa(2B)	88.94	TRUE
1280_8149	MSSA	FALSE	0			0	TRUE
1280_3926	MRSA	TRUE	1	SCCmec_type_IVa(2B)	SCCmec_type_IVa(2B)	88.93	TRUE
1280_13676	MRSA	TRUE	1	SCCmec_type_IVc(2B)	SCCmec_type_IVc(2B)	92.92	TRUE
1410734_3	MRSA	TRUE	1	SCCmec_type_IVa(2B)	SCCmec_type_IVa(2B)	88.48	TRUE
1280_25115	MRSA	TRUE	Multiple	SCCmec_type_IV(2B)	SCCmec_type_II(2A)	51.76	FALSE
1418370_3	MRSA	TRUE	1	SCCmec_type_IVa(2B)	SCCmec_type_IVa(2B)	88.38	TRUE
46170_160	MRSA	TRUE	1	SCCmec_type_IVc(2B)	SCCmec_type_IVc(2B)	93.84	TRUE
1421882_3	MRSA	TRUE	1	SCCmec_type_IVd(2B)	SCCmec_type_IVd(2B)	93.64	TRUE
1280_4523	MRSA	TRUE	1	SCCmec_type_IVa(2B)	SCCmec_type_IVa(2B)	88.94	TRUE
1411558_3	MRSA	TRUE	1	SCCmec_type_IVa(2B)	SCCmec_type_IVa(2B)	88.72	TRUE
1280_4937	MSSA	FALSE	0			0	TRUE
1280_23313	MRSA	TRUE	1	SCCmec_type_II(2A)	SCCmec_type_II(2A)	54.5	TRUE
1280_3352	MRSA	TRUE	1	SCCmec_type_IVa(2B)	SCCmec_type_IVa(2B)	88.93	TRUE
1241616_6	MSSA	FALSE	0			0	TRUE
1280_17982	MRSA	TRUE	1	SCCmec_type_IVc(2B)	SCCmec_type_IVc(2B)	93.63	TRUE
1409436_3	MRSA	TRUE	Multiple	SCCmec_type_IVg(2B)	SCCmec_type_IVc(2B)	79.12	FALSE
1280_27484	MRSA	TRUE	1	SCCmec_type_IVc(2B)	SCCmec_type_IVc(2B)	93.86	TRUE
1418369_3	MRSA	TRUE	1	SCCmec_type_IVa(2B)	SCCmec_type_IVa(2B)	88.29	TRUE
1412627_3	MRSA	TRUE	1	SCCmec_type_IVa(2B)	SCCmec_type_IVa(2B)	89.05	TRUE
1409503_3	MRSA	TRUE	1	SCCmec_type_IVa(2B)	SCCmec_type_IVa(2B)	88.82	TRUE
1280_27495	MRSA	TRUE	1	SCCmec_type_IVa(2B)	SCCmec_type_IVa(2B)	88.95	TRUE
1280_12292	MRSA	TRUE	1	SCCmec_type_IVa(2B)	SCCmec_type_IVa(2B)	88.87	TRUE
1280_11656	MSSA	FALSE	0			0	TRUE
1280_4394	MRSA	TRUE	1	SCCmec_type_IVa(2B)	SCCmec_type_IVa(2B)	88.82	TRUE
46170_354	MRSA	TRUE	1	SCCmec_type_IVa(2B)	SCCmec_type_IVa(2B)	88.91	TRUE
1280_4399	MRSA	TRUE	1	SCCmec_type_IVa(2B)	SCCmec_type_IVa(2B)	88.87	TRUE
1280_21137	MRSA	TRUE	Multiple	SCCmec_type_IVg(2B)	SCCmec_type_IVc(2B)	78.28	FALSE
1418339_3	MRSA	TRUE	1	SCCmec_type_IVa(2B)	SCCmec_type_IVa(2B)	88.88	TRUE
1418395_3	MRSA	TRUE	1	SCCmec_type_IVa(2B)	SCCmec_type_IVa(2B)	88.52	TRUE
1156995_3	MRSA	TRUE	1	SCCmec_type_IVa(2B)	SCCmec_type_IVa(2B)	89.06	TRUE
1280_8134	MSSA	FALSE	0			0	TRUE
1417102_3	MRSA	TRUE	1	SCCmec_type_IVa(2B)	SCCmec_type_IVa(2B)	87.31	TRUE
1417147_3	MRSA	TRUE	1	SCCmec_type_IVa(2B)	SCCmec_type_IVa(2B)	88.83	TRUE
1280_5958	MRSA	TRUE	Multiple	SCCmec_type_VI(4B)	SCCmec_type_VIII(4A)	72.57	FALSE
1280_3859	MRSA	TRUE	1	SCCmec_type_IVa(2B)	SCCmec_type_IVa(2B)	88.92	TRUE
1280_4457	MRSA	TRUE	1	SCCmec_type_IVa(2B)	SCCmec_type_IVa(2B)	88.88	TRUE
1280_16170	MRSA	TRUE	1	SCCmec_type_IVa(2B)	SCCmec_type_IVa(2B)	88.64	TRUE
1421878_3	MRSA	TRUE	1	SCCmec_type_IVa(2B)	SCCmec_type_IVa(2B)	88.73	TRUE
46170_170	MRSA	TRUE	1	SCCmec_type_IVa(2B)	SCCmec_type_IVa(2B)	88.97	TRUE
1421880_3	MRSA	TRUE	1	SCCmec_type_IVa(2B)	SCCmec_type_IVa(2B)	88.75	TRUE
1280_12342	MRSA	TRUE	1	SCCmec_type_IVa(2B)	SCCmec_type_IVa(2B)	88.95	TRUE
1280_16137	MRSA	TRUE	1	SCCmec_type_IVa(2B)	SCCmec_type_IVa(2B)	88.96	TRUE
1280_12423	MRSA	TRUE	1	SCCmec_type_IVa(2B)	SCCmec_type_IVa(2B)	88.74	TRUE
1280_3837	MRSA	TRUE	1	SCCmec_type_IVa(2B)	SCCmec_type_IVa(2B)	88.71	TRUE
1409427_3	MRSA	TRUE	1	SCCmec_type_IVa(2B)	SCCmec_type_IVa(2B)	88.72	TRUE
1280_30863	MRSA	TRUE	1	SCCmec_type_IVa(2B)	SCCmec_type_IVa(2B)	88.94	TRUE
1280_4860	MRSA	TRUE	1	SCCmec_type_IVa(2B)	SCCmec_type_IVa(2B)	89.06	TRUE
1411532_3	MRSA	TRUE	1	SCCmec_type_IVa(2B)	SCCmec_type_IVa(2B)	89.01	TRUE
1411561_3	MRSA	TRUE	1	SCCmec_type_IVa(2B)	SCCmec_type_IVa(2B)	89.04	TRUE
93061_132	MSSA	FALSE	0			0	TRUE
1409781_3	MRSA	TRUE	1	SCCmec_type_IVa(2B)	SCCmec_type_IVa(2B)	88.79	TRUE
1280_17834	MSSA	FALSE	0			0	TRUE
1280_27490	MRSA	TRUE	1	SCCmec_type_IVa(2B)	SCCmec_type_IVa(2B)	89	TRUE
1418398_3	MRSA	TRUE	1	SCCmec_type_IVa(2B)	SCCmec_type_IVa(2B)	88.94	TRUE
1280_4346	MSSA	FALSE	0			0	TRUE
1280_19628	MRSA	TRUE	Multiple	SCCmec_type_IVg(2B)	SCCmec_type_IVc(2B)	79.18	FALSE
1608879_4	MRSA	TRUE	1	SCCmec_type_IVa(2B)	SCCmec_type_IVa(2B)	87.33	TRUE
1280_18601	MRSA	TRUE	1	SCCmec_type_IVa(2B)	SCCmec_type_IVa(2B)	88.92	TRUE
1280_3997	MRSA	TRUE	1	SCCmec_type_IVa(2B)	SCCmec_type_IVa(2B)	88.69	TRUE
1421894_3	MRSA	TRUE	1	SCCmec_type_IVa(2B)	SCCmec_type_IVa(2B)	88.99	TRUE
1280_13712	MRSA	TRUE	1	SCCmec_type_IVb(2B)	SCCmec_type_IVb(2B)	96.61	TRUE
1280_4649	MRSA	TRUE	1	SCCmec_type_IVa(2B)	SCCmec_type_IVa(2B)	88.88	TRUE
1410773_3	MRSA	TRUE	1	SCCmec_type_IVa(2B)	SCCmec_type_IVa(2B)	88.85	TRUE
1280_25145	MRSA	TRUE	Multiple	SCCmec_type_IV(2B)	SCCmec_type_II(2A)	51.87	FALSE
1280_3858	MRSA	TRUE	1	SCCmec_type_IVa(2B)	SCCmec_type_IVa(2B)	88.94	TRUE
1280_4752	MRSA	TRUE	1	SCCmec_type_IVa(2B)	SCCmec_type_IVa(2B)	88.7	TRUE
46170_600	MSSA	FALSE	0			0	TRUE
1410797_3	MRSA	TRUE	1	SCCmec_type_IVa(2B)	SCCmec_type_IVa(2B)	88.91	TRUE
1280_10140	MSSA	FALSE	0			0	TRUE
1412755_3	MSSA	FALSE	0			0	TRUE
46170_166	MRSA	TRUE	1	SCCmec_type_IVa(2B)	SCCmec_type_IVa(2B)	89.05	TRUE
1280_3818	MRSA	TRUE	1	SCCmec_type_IVa(2B)	SCCmec_type_IVa(2B)	88.76	TRUE
46170_358	MRSA	TRUE	1	SCCmec_type_IVa(2B)	SCCmec_type_IVa(2B)	88.95	TRUE
1280_27480	MRSA	TRUE	1	SCCmec_type_IVa(2B)	SCCmec_type_IVa(2B)	88.99	TRUE
1410849_3	MRSA	TRUE	1	SCCmec_type_IVa(2B)	SCCmec_type_IVa(2B)	88.54	TRUE
1280_4687	MRSA	TRUE	1	SCCmec_type_IVc(2B)	SCCmec_type_IVc(2B)	93.74	TRUE
1417176_3	MRSA	TRUE	1	SCCmec_type_IVa(2B)	SCCmec_type_IVa(2B)	87.95	TRUE
1280_4410	MRSA	TRUE	1	SCCmec_type_IVa(2B)	SCCmec_type_IVa(2B)	87.88	TRUE
1280_25975	MSSA	FALSE	0			0	TRUE
1280_4536	MRSA	TRUE	1	SCCmec_type_IVa(2B)	SCCmec_type_IVa(2B)	88.85	TRUE
46170_360	MRSA	TRUE	1	SCCmec_type_IVa(2B)	SCCmec_type_IVa(2B)	88.93	TRUE
1418425_3	MRSA	TRUE	1	SCCmec_type_IVa(2B)	SCCmec_type_IVa(2B)	88.75	TRUE
1421855_3	MRSA	TRUE	Multiple	SCCmec_type_IVg(2B)	SCCmec_type_IVc(2B)	78.83	FALSE
1280_4052	MRSA	TRUE	1	SCCmec_type_IVa(2B)	SCCmec_type_IVa(2B)	88.87	TRUE
1280_4680	MRSA	TRUE	1	SCCmec_type_IVa(2B)	SCCmec_type_IVa(2B)	88.67	TRUE
46170_167	MRSA	TRUE	1	SCCmec_type_IVa(2B)	SCCmec_type_IVa(2B)	89.07	TRUE
1280_4414	MRSA	TRUE	1	SCCmec_type_IVa(2B)	SCCmec_type_IVa(2B)	88.94	TRUE
1418384_3	MRSA	TRUE	1	SCCmec_type_IVa(2B)	SCCmec_type_IVa(2B)	88.46	TRUE
1280_13706	MRSA	TRUE	1	SCCmec_type_IVa(2B)	SCCmec_type_IVa(2B)	87.75	TRUE
1280_18509	MRSA	TRUE	1	SCCmec_type_IVa(2B)	SCCmec_type_IVa(2B)	89	TRUE
1280_13639	MRSA	TRUE	1	SCCmec_type_IVa(2B)	SCCmec_type_IVa(2B)	88.88	TRUE
1280_4735	MRSA	TRUE	1	SCCmec_type_IVa(2B)	SCCmec_type_IVa(2B)	87.04	TRUE
1280_3873	MRSA	TRUE	1	SCCmec_type_IVa(2B)	SCCmec_type_IVa(2B)	88.94	TRUE
1409367_3	MRSA	TRUE	1	SCCmec_type_IVa(2B)	SCCmec_type_IVa(2B)	88.52	TRUE
1280_3827	MRSA	TRUE	1	SCCmec_type_IVa(2B)	SCCmec_type_IVa(2B)	88.73	TRUE
1280_3848	MSSA	FALSE	0			0	TRUE
1280_3939	MSSA	FALSE	0			0	TRUE
561307_22	MSSA	FALSE	0			0	TRUE
1417187_3	MRSA	TRUE	Multiple	SCCmec_type_IVg(2B)	SCCmec_type_IVc(2B)	79.58	FALSE
1280_4647	MRSA	TRUE	1	SCCmec_type_IVa(2B)	SCCmec_type_IVa(2B)	88.88	TRUE
1412807_3	MRSA	TRUE	1	SCCmec_type_IVa(2B)	SCCmec_type_IVa(2B)	88.02	TRUE
1409644_3	MRSA	TRUE	1	SCCmec_type_IVa(2B)	SCCmec_type_IVa(2B)	88.06	TRUE
1280_21781	MRSA	TRUE	1	SCCmec_type_IVa(2B)	SCCmec_type_IVa(2B)	89.06	TRUE
1280_28564	MSSA	FALSE	0			0	TRUE
1280_29076	MSSA	FALSE	0			0	TRUE
1280_12578	MRSA	TRUE	1	SCCmec_type_IVa(2B)	SCCmec_type_IVa(2B)	88.91	TRUE
1280_4827	MSSA	FALSE	0			0	TRUE
1280_4667	MRSA	TRUE	1	SCCmec_type_IVa(2B)	SCCmec_type_IVa(2B)	88.79	TRUE
1280_4017	MSSA	FALSE	0			0	TRUE
1412752_3	MRSA	TRUE	1	SCCmec_type_IVa(2B)	SCCmec_type_IVa(2B)	88.79	TRUE
1280_4750	MRSA	TRUE	1	SCCmec_type_IVa(2B)	SCCmec_type_IVa(2B)	86.95	TRUE
1411516_3	MRSA	TRUE	1	SCCmec_type_IVa(2B)	SCCmec_type_IVa(2B)	88.88	TRUE
1418441_3	MRSA	TRUE	1	SCCmec_type_IVa(2B)	SCCmec_type_IVa(2B)	88.75	TRUE
1409595_3	MRSA	TRUE	1	SCCmec_type_IVa(2B)	SCCmec_type_IVa(2B)	87.5	TRUE
1280_4714	MRSA	TRUE	1	SCCmec_type_IVa(2B)	SCCmec_type_IVa(2B)	88.69	TRUE
1418347_3	MRSA	TRUE	1	SCCmec_type_IVa(2B)	SCCmec_type_IVa(2B)	88.88	TRUE
1417073_3	MRSA	TRUE	1	SCCmec_type_IVa(2B)	SCCmec_type_IVa(2B)	88.96	TRUE
1280_4789	MRSA	TRUE	1	SCCmec_type_IVa(2B)	SCCmec_type_IVa(2B)	89.06	TRUE
1418355_3	MRSA	TRUE	1	SCCmec_type_IVa(2B)	SCCmec_type_IVa(2B)	88.81	TRUE
1280_4745	MRSA	TRUE	1	SCCmec_type_IVa(2B)	SCCmec_type_IVa(2B)	88.92	TRUE
1410749_3	MRSA	TRUE	1	SCCmec_type_IVa(2B)	SCCmec_type_IVa(2B)	88.72	TRUE
1739530_3	MSSA	FALSE	0			0	TRUE
1280_3846	MRSA	TRUE	1	SCCmec_type_IVa(2B)	SCCmec_type_IVa(2B)	88.82	TRUE
1280_4806	MSSA	FALSE	0			0	TRUE
1280_3831	MRSA	TRUE	1	SCCmec_type_IVa(2B)	SCCmec_type_IVa(2B)	88.92	TRUE
1417115_3	MRSA	TRUE	1	SCCmec_type_IVa(2B)	SCCmec_type_IVa(2B)	89.06	TRUE
1280_4016	MRSA	TRUE	1	SCCmec_type_IVa(2B)	SCCmec_type_IVa(2B)	88.85	TRUE
1280_12288	MRSA	TRUE	1	SCCmec_type_IVa(2B)	SCCmec_type_IVa(2B)	88.86	TRUE
1280_21823	MRSA	TRUE	Multiple	SCCmec_type_IV(2B)	SCCmec_type_IV(2B)	95.61	TRUE
1412695_3	MRSA	TRUE	1	SCCmec_type_IVa(2B)	SCCmec_type_IVa(2B)	88.98	TRUE
1412747_3	MRSA	TRUE	1	SCCmec_type_IVa(2B)	SCCmec_type_IVa(2B)	88.9	TRUE
46170_608	MSSA	FALSE	0			0	TRUE
1421865_3	MRSA	TRUE	1	SCCmec_type_IVa(2B)	SCCmec_type_IVa(2B)	88.87	TRUE
1418321_3	MRSA	TRUE	1	SCCmec_type_IVa(2B)	SCCmec_type_IVa(2B)	87.72	TRUE
1418381_3	MRSA	TRUE	1	SCCmec_type_IVa(2B)	SCCmec_type_IVa(2B)	88.69	TRUE
1280_16159	MRSA	TRUE	1	SCCmec_type_IVc(2B)	SCCmec_type_IVc(2B)	93.83	TRUE
1280_7290	MRSA	TRUE	Multiple	SCCmec_type_IVg(2B)	SCCmec_type_IVc(2B)	79.23	FALSE
1280_23608	MSSA	FALSE	0			0	TRUE
1412720_3	MRSA	TRUE	1	SCCmec_type_IVa(2B)	SCCmec_type_IVa(2B)	88.81	TRUE
1402807_3	MRSA	TRUE	Multiple	SCCmec_type_IVg(2B)	SCCmec_type_IVc(2B)	76.37	FALSE
1417165_3	MRSA	TRUE	1	SCCmec_type_IVa(2B)	SCCmec_type_IVa(2B)	88.58	TRUE
1280_4491	MSSA	FALSE	0			0	TRUE
1409617_3	MRSA	TRUE	1	SCCmec_type_IVa(2B)	SCCmec_type_IVa(2B)	88.88	TRUE
1280_4430	MSSA	FALSE	0			0	TRUE
1280_24877	MRSA	TRUE	1	SCCmec_type_IVa(2B)	SCCmec_type_IVa(2B)	87.88	TRUE
1280_12417	MSSA	FALSE	0			0	TRUE
1280_3966	MRSA	TRUE	1	SCCmec_type_IVa(2B)	SCCmec_type_IVa(2B)	88.88	TRUE
1280_4534	MRSA	TRUE	1	SCCmec_type_IVa(2B)	SCCmec_type_IVa(2B)	88.94	TRUE
1280_4382	MRSA	TRUE	1	SCCmec_type_IVa(2B)	SCCmec_type_IVa(2B)	89.01	TRUE
1280_4676	MRSA	TRUE	1	SCCmec_type_IVa(2B)	SCCmec_type_IVa(2B)	89.02	TRUE
1280_27476	MRSA	TRUE	1	SCCmec_type_IVa(2B)	SCCmec_type_IVa(2B)	89	TRUE
1410814_3	MRSA	TRUE	1	SCCmec_type_IVa(2B)	SCCmec_type_IVa(2B)	88.86	TRUE
1410834_3	MRSA	TRUE	1	SCCmec_type_IVa(2B)	SCCmec_type_IVa(2B)	88.73	TRUE
1608890_4	MRSA	TRUE	1	SCCmec_type_IVa(2B)	SCCmec_type_IVa(2B)	87.17	TRUE
1280_4029	MRSA	TRUE	1	SCCmec_type_IVa(2B)	SCCmec_type_IVa(2B)	91.13	TRUE
1417061_3	MRSA	TRUE	1	SCCmec_type_IVa(2B)	SCCmec_type_IVa(2B)	88.9	TRUE
1280_12486	MRSA	TRUE	1	SCCmec_type_IVa(2B)	SCCmec_type_IVa(2B)	88.82	TRUE
1402812_3	MRSA	TRUE	Multiple	SCCmec_type_IVg(2B)	SCCmec_type_IVc(2B)	74.62	FALSE
1409697_3	MRSA	TRUE	1	SCCmec_type_IVa(2B)	SCCmec_type_IVa(2B)	88.55	TRUE
1402775_3	MRSA	TRUE	Multiple	SCCmec_type_IVg(2B)	SCCmec_type_IVc(2B)	76.26	FALSE
1280_12405	MRSA	TRUE	1	SCCmec_type_IVa(2B)	SCCmec_type_IVa(2B)	89.05	TRUE
1417090_3	MRSA	TRUE	1	SCCmec_type_IVa(2B)	SCCmec_type_IVa(2B)	88.81	TRUE
904776_3	MRSA	TRUE	1	SCCmec_type_IVa(2B)	SCCmec_type_IVa(2B)	88.53	TRUE
1280_4530	MRSA	TRUE	1	SCCmec_type_IVa(2B)	SCCmec_type_IVa(2B)	89.01	TRUE
1280_19786	MRSA	TRUE	Multiple	SCCmec_type_IVg(2B)	SCCmec_type_IVc(2B)	79.18	FALSE
1410843_3	MRSA	TRUE	1	SCCmec_type_IVa(2B)	SCCmec_type_IVa(2B)	88.9	TRUE
1608873_4	MRSA	TRUE	1	SCCmec_type_IVa(2B)	SCCmec_type_IVa(2B)	87.73	TRUE
1280_4059	MRSA	TRUE	1	SCCmec_type_IVa(2B)	SCCmec_type_IVa(2B)	88.88	TRUE
1280_4859	MRSA	TRUE	Multiple	SCCmec_type_IV(2B)	SCCmec_type_IV(2B)	89.05	TRUE
1280_4472	MSSA	FALSE	0			0	TRUE
1280_4053	MRSA	TRUE	1	SCCmec_type_IVa(2B)	SCCmec_type_IVa(2B)	87.68	TRUE
1418380_3	MRSA	TRUE	1	SCCmec_type_IVa(2B)	SCCmec_type_IVa(2B)	88.35	TRUE
1280_4666	MRSA	TRUE	1	SCCmec_type_IVa(2B)	SCCmec_type_IVa(2B)	89	TRUE
1280_4670	MSSA	FALSE	0			0	TRUE
1280_27463	MRSA	TRUE	1	SCCmec_type_IVa(2B)	SCCmec_type_IVa(2B)	89.06	TRUE
1280_8135	MSSA	FALSE	0			0	TRUE
1280_25776	MSSA	FALSE	0			0	TRUE
1280_4703	MRSA	TRUE	1	SCCmec_type_IVa(2B)	SCCmec_type_IVa(2B)	86.79	TRUE
1280_4645	MRSA	TRUE	1	SCCmec_type_IVc(2B)	SCCmec_type_IVc(2B)	93.68	TRUE
1280_27635	MRSA	TRUE	Multiple	SCCmec_type_V(5C2)	SCCmec_type_V(5C2&5)	68.5	FALSE
1410825_3	MRSA	TRUE	1	SCCmec_type_IVa(2B)	SCCmec_type_IVa(2B)	88.87	TRUE
1280_3808	MRSA	TRUE	1	SCCmec_type_IVa(2B)	SCCmec_type_IVa(2B)	87.82	TRUE
1280_3989	MRSA	TRUE	1	SCCmec_type_IVa(2B)	SCCmec_type_IVa(2B)	88.78	TRUE
1421886_3	MRSA	TRUE	1	SCCmec_type_IVa(2B)	SCCmec_type_IVa(2B)	88.88	TRUE
1421872_3	MRSA	TRUE	1	SCCmec_type_IVa(2B)	SCCmec_type_IVa(2B)	88.35	TRUE
1417179_3	MRSA	TRUE	1	SCCmec_type_IVa(2B)	SCCmec_type_IVa(2B)	88.8	TRUE
1417152_3	MRSA	TRUE	1	SCCmec_type_IVa(2B)	SCCmec_type_IVa(2B)	88.62	TRUE
1412670_3	MRSA	TRUE	1	SCCmec_type_IVa(2B)	SCCmec_type_IVa(2B)	88.62	TRUE
1280_17964	MSSA	FALSE	0			0	TRUE
1280_4764	MRSA	TRUE	1	SCCmec_type_IVa(2B)	SCCmec_type_IVa(2B)	88.7	TRUE
1280_3719	MSSA	FALSE	0			0	TRUE
1280_4727	MRSA	TRUE	1	SCCmec_type_IVa(2B)	SCCmec_type_IVa(2B)	88.52	TRUE
1280_4756	MRSA	TRUE	1	SCCmec_type_IVa(2B)	SCCmec_type_IVa(2B)	88.67	TRUE
1421871_3	MRSA	TRUE	1	SCCmec_type_IVa(2B)	SCCmec_type_IVa(2B)	88.86	TRUE
1409409_3	MRSA	TRUE	1	SCCmec_type_IVa(2B)	SCCmec_type_IVa(2B)	88.74	TRUE
1280_4985	MRSA	TRUE	1	SCCmec_type_IVa(2B)	SCCmec_type_IVa(2B)	89	TRUE
1410756_3	MRSA	TRUE	1	SCCmec_type_IVa(2B)	SCCmec_type_IVa(2B)	88.87	TRUE
1280_3987	MRSA	TRUE	1	SCCmec_type_IVa(2B)	SCCmec_type_IVa(2B)	88.69	TRUE
1410686_3	MRSA	TRUE	1	SCCmec_type_IVa(2B)	SCCmec_type_IVa(2B)	88.93	TRUE
1402776_3	MRSA	TRUE	Multiple	SCCmec_type_IVg(2B)	SCCmec_type_IVc(2B)	75.16	FALSE
1280_4815	MSSA	FALSE	0			0	TRUE
904734_3	MSSA	FALSE	0			0	TRUE
1412651_3	MRSA	TRUE	1	SCCmec_type_IVa(2B)	SCCmec_type_IVa(2B)	88.66	TRUE
1280_23559	MSSA	FALSE	0			0	TRUE
1410780_3	MRSA	TRUE	Multiple	SCCmec_type_IVg(2B)	SCCmec_type_IVc(2B)	79.81	FALSE
1409360_3	MRSA	TRUE	Multiple	SCCmec_type_IVg(2B)	SCCmec_type_IVc(2B)	79.19	FALSE
1280_4953	MSSA	FALSE	0			0	TRUE
1409533_3	MRSA	TRUE	1	SCCmec_type_IVa(2B)	SCCmec_type_IVa(2B)	88.79	TRUE
1411563_3	MRSA	TRUE	1	SCCmec_type_IVa(2B)	SCCmec_type_IVa(2B)	88.82	TRUE
1421899_3	MRSA	TRUE	1	SCCmec_type_IVa(2B)	SCCmec_type_IVa(2B)	85.54	TRUE
1412664_3	MRSA	TRUE	1	SCCmec_type_IVa(2B)	SCCmec_type_IVa(2B)	88.61	TRUE
1280_4678	MSSA	FALSE	0			0	TRUE
1410689_3	MRSA	TRUE	1	SCCmec_type_IVa(2B)	SCCmec_type_IVa(2B)	88.86	TRUE
1280_12306	MRSA	TRUE	1	SCCmec_type_IVa(2B)	SCCmec_type_IVa(2B)	88.7	TRUE
46170_249	MSSA	FALSE	0			0	TRUE
1280_4776	MRSA	TRUE	1	SCCmec_type_IVa(2B)	SCCmec_type_IVa(2B)	88.53	TRUE
1280_4436	MRSA	TRUE	1	SCCmec_type_IVa(2B)	SCCmec_type_IVa(2B)	88.98	TRUE
1280_4729	MRSA	TRUE	Multiple	SCCmec_type_IVg(2B)	SCCmec_type_IVc(2B)	80.2	FALSE
1280_4939	MSSA	FALSE	0			0	TRUE
1280_9942	MSSA	FALSE	0			0	TRUE
1280_18602	MRSA	TRUE	1	SCCmec_type_IVa(2B)	SCCmec_type_IVa(2B)	88.92	TRUE
1280_4518	MRSA	TRUE	1	SCCmec_type_IVa(2B)	SCCmec_type_IVa(2B)	88.95	TRUE
1410751_3	MRSA	TRUE	1	SCCmec_type_IVa(2B)	SCCmec_type_IVa(2B)	88.63	TRUE
1280_11685	MRSA	TRUE	1	SCCmec_type_IVa(2B)	SCCmec_type_IVa(2B)	89	TRUE
1280_4915	MSSA	FALSE	0			0	TRUE
1280_26408	MRSA	TRUE	1	SCCmec_type_IVa(2B)	SCCmec_type_IVa(2B)	88.75	TRUE
1280_4989	MRSA	TRUE	1	SCCmec_type_IVa(2B)	SCCmec_type_IVa(2B)	88.99	TRUE
1421839_3	MRSA	TRUE	1	SCCmec_type_IVa(2B)	SCCmec_type_IVa(2B)	88.46	TRUE
1280_4646	MSSA	FALSE	0			0	TRUE
1280_15994	MRSA	TRUE	1	SCCmec_type_IVa(2B)	SCCmec_type_IVa(2B)	88.94	TRUE
1280_10027	MSSA	FALSE	0			0	TRUE
1410908_3	MRSA	TRUE	1	SCCmec_type_IVa(2B)	SCCmec_type_IVa(2B)	88.66	TRUE
1280_4814	MRSA	TRUE	1	SCCmec_type_IVc(2B)	SCCmec_type_IVc(2B)	83.16	TRUE
1410810_3	MRSA	TRUE	1	SCCmec_type_IVa(2B)	SCCmec_type_IVa(2B)	88.75	TRUE
1409364_3	MRSA	TRUE	1	SCCmec_type_IVa(2B)	SCCmec_type_IVa(2B)	88.17	TRUE
1458279_3	MRSA	TRUE	1	SCCmec_type_IVa(2B)	SCCmec_type_IVa(2B)	89.01	TRUE
1280_3908	MRSA	TRUE	1	SCCmec_type_IVa(2B)	SCCmec_type_IVa(2B)	87.14	TRUE
1409741_3	MRSA	TRUE	1	SCCmec_type_IVa(2B)	SCCmec_type_IVa(2B)	88.76	TRUE
1417107_3	MRSA	TRUE	1	SCCmec_type_IVa(2B)	SCCmec_type_IVa(2B)	88.51	TRUE
1410886_3	MRSA	TRUE	1	SCCmec_type_IVa(2B)	SCCmec_type_IVa(2B)	86.79	TRUE
1280_27472	MRSA	TRUE	1	SCCmec_type_IVa(2B)	SCCmec_type_IVa(2B)	88.98	TRUE
46170_344	MRSA	TRUE	1	SCCmec_type_IVa(2B)	SCCmec_type_IVa(2B)	88.95	TRUE
46170_359	MRSA	TRUE	1	SCCmec_type_IVa(2B)	SCCmec_type_IVa(2B)	88.86	TRUE
1280_4037	MRSA	TRUE	1	SCCmec_type_IVa(2B)	SCCmec_type_IVa(2B)	88.88	TRUE
1280_21623	MSSA	FALSE	0			0	TRUE
1412781_3	MRSA	TRUE	Multiple	SCCmec_type_IVg(2B)	SCCmec_type_IVc(2B)	77.77	FALSE
1412653_3	MRSA	TRUE	1	SCCmec_type_IVa(2B)	SCCmec_type_IVa(2B)	88.94	TRUE
46170_161	MRSA	TRUE	1	SCCmec_type_IVa(2B)	SCCmec_type_IVa(2B)	89.06	TRUE
1280_4690	MRSA	TRUE	1	SCCmec_type_IVa(2B)	SCCmec_type_IVa(2B)	91.32	TRUE
1410741_3	MRSA	TRUE	1	SCCmec_type_IVa(2B)	SCCmec_type_IVa(2B)	88.48	TRUE
1280_3532	MSSA	FALSE	0			0	TRUE
1280_4505	MRSA	TRUE	1	SCCmec_type_IVa(2B)	SCCmec_type_IVa(2B)	88.82	TRUE
1410910_3	MRSA	TRUE	1	SCCmec_type_IVa(2B)	SCCmec_type_IVa(2B)	88.94	TRUE
1280_4447	MRSA	TRUE	1	SCCmec_type_IVa(2B)	SCCmec_type_IVa(2B)	88.29	TRUE
1280_28565	MSSA	FALSE	0			0	TRUE
46170_639	MSSA	FALSE	0			0	TRUE
1280_27481	MRSA	TRUE	1	SCCmec_type_IVa(2B)	SCCmec_type_IVa(2B)	89	TRUE
1412711_3	MRSA	TRUE	1	SCCmec_type_IVa(2B)	SCCmec_type_IVa(2B)	88.88	TRUE
1280_16711	MRSA	TRUE	1	SCCmec_type_IVb(2B)	SCCmec_type_IVb(2B)	96.36	TRUE
1412790_3	MRSA	TRUE	1	SCCmec_type_IVa(2B)	SCCmec_type_IVa(2B)	88.71	TRUE
1411513_3	MRSA	TRUE	1	SCCmec_type_IVa(2B)	SCCmec_type_IVa(2B)	88.24	TRUE
1409730_3	MRSA	TRUE	1	SCCmec_type_IVa(2B)	SCCmec_type_IVa(2B)	88.86	TRUE
1421844_3	MRSA	TRUE	1	SCCmec_type_IVa(2B)	SCCmec_type_IVa(2B)	88.89	TRUE
1280_3889	MRSA	TRUE	1	SCCmec_type_IVa(2B)	SCCmec_type_IVa(2B)	88.9	TRUE
1409417_3	MRSA	TRUE	1	SCCmec_type_IVa(2B)	SCCmec_type_IVa(2B)	88.74	TRUE
1280_3850	MRSA	TRUE	1	SCCmec_type_IVa(2B)	SCCmec_type_IVa(2B)	88.93	TRUE
1280_3961	MRSA	TRUE	1	SCCmec_type_IVa(2B)	SCCmec_type_IVa(2B)	87.64	TRUE
1417091_3	MRSA	TRUE	1	SCCmec_type_IVa(2B)	SCCmec_type_IVa(2B)	88.6	TRUE
1280_4849	MSSA	FALSE	0			0	TRUE
1280_4682	MRSA	TRUE	1	SCCmec_type_IVa(2B)	SCCmec_type_IVa(2B)	88.94	TRUE
1280_12607	MRSA	TRUE	1	SCCmec_type_IVa(2B)	SCCmec_type_IVa(2B)	88.9	TRUE
1280_3893	MRSA	TRUE	1	SCCmec_type_IVa(2B)	SCCmec_type_IVa(2B)	88.69	TRUE
1410903_3	MRSA	TRUE	1	SCCmec_type_IVa(2B)	SCCmec_type_IVa(2B)	88.42	TRUE
1280_12505	MRSA	TRUE	1	SCCmec_type_IVa(2B)	SCCmec_type_IVa(2B)	88.65	TRUE
1280_12444	MRSA	TRUE	1	SCCmec_type_IVa(2B)	SCCmec_type_IVa(2B)	88.99	TRUE
1280_7287	MRSA	TRUE	Multiple	SCCmec_type_IV(2B)	SCCmec_type_IV(2B)	85.14	TRUE
1280_4786	MRSA	TRUE	1	SCCmec_type_IVa(2B)	SCCmec_type_IVa(2B)	87.89	TRUE
1280_3851	MRSA	TRUE	1	SCCmec_type_IVa(2B)	SCCmec_type_IVa(2B)	89.05	TRUE
1280_4657	MRSA	TRUE	1	SCCmec_type_IVa(2B)	SCCmec_type_IVa(2B)	88.94	TRUE
1280_3816	MRSA	TRUE	1	SCCmec_type_IVa(2B)	SCCmec_type_IVa(2B)	86.95	TRUE
1608878_4	MRSA	TRUE	1	SCCmec_type_IVa(2B)	SCCmec_type_IVa(2B)	88.11	TRUE
1409438_3	MRSA	TRUE	1	SCCmec_type_IVa(2B)	SCCmec_type_IVa(2B)	88.81	TRUE
1409379_3	MRSA	TRUE	1	SCCmec_type_IVa(2B)	SCCmec_type_IVa(2B)	88.79	TRUE
1280_17986	MRSA	TRUE	1	SCCmec_type_IVa(2B)	SCCmec_type_IVa(2B)	88.48	TRUE
1417126_3	MRSA	TRUE	1	SCCmec_type_IVa(2B)	SCCmec_type_IVa(2B)	88.59	TRUE
1280_27498	MRSA	TRUE	1	SCCmec_type_IVa(2B)	SCCmec_type_IVa(2B)	89	TRUE
1409780_3	MRSA	TRUE	1	SCCmec_type_IVa(2B)	SCCmec_type_IVa(2B)	88.01	TRUE
1280_12533	MRSA	TRUE	1	SCCmec_type_IVa(2B)	SCCmec_type_IVa(2B)	88.64	TRUE
1280_4719	MRSA	TRUE	1	SCCmec_type_IVa(2B)	SCCmec_type_IVa(2B)	88.91	TRUE
1280_20975	MRSA	TRUE	1	SCCmec_type_IVa(2B)	SCCmec_type_IVa(2B)	89.03	TRUE
1410740_3	MRSA	TRUE	1	SCCmec_type_IVa(2B)	SCCmec_type_IVa(2B)	89.12	TRUE
46170_163	MRSA	TRUE	1	SCCmec_type_IVa(2B)	SCCmec_type_IVa(2B)	89.04	TRUE
1412731_3	MRSA	TRUE	1	SCCmec_type_IVa(2B)	SCCmec_type_IVa(2B)	88.6	TRUE
1417223_3	MRSA	TRUE	1	SCCmec_type_IVa(2B)	SCCmec_type_IVa(2B)	88.91	TRUE
1280_4392	MRSA	TRUE	1	SCCmec_type_IVa(2B)	SCCmec_type_IVa(2B)	88.6	TRUE
1280_3924	MRSA	TRUE	1	SCCmec_type_IVa(2B)	SCCmec_type_IVa(2B)	88.79	TRUE
1280_4458	MRSA	TRUE	1	SCCmec_type_IVa(2B)	SCCmec_type_IVa(2B)	88.78	TRUE
1280_3938	MRSA	TRUE	1	SCCmec_type_IVa(2B)	SCCmec_type_IVa(2B)	88.93	TRUE
1280_11658	MSSA	FALSE	0			0	TRUE
1409464_3	MRSA	TRUE	1	SCCmec_type_IVa(2B)	SCCmec_type_IVa(2B)	88.45	TRUE
1280_3984	MRSA	TRUE	1	SCCmec_type_IVa(2B)	SCCmec_type_IVa(2B)	89	TRUE
1418338_3	MRSA	TRUE	1	SCCmec_type_IVa(2B)	SCCmec_type_IVa(2B)	88.59	TRUE
1280_16632	MSSA	FALSE	0			0	TRUE
1421856_3	MRSA	TRUE	Multiple	SCCmec_type_IVg(2B)	SCCmec_type_IVc(2B)	76.75	FALSE
46170_176	MRSA	TRUE	1	SCCmec_type_IVc(2B)	SCCmec_type_IVc(2B)	93.74	TRUE
1280_4486	MRSA	TRUE	1	SCCmec_type_IVd(2B)	SCCmec_type_IVd(2B)	96.56	TRUE
1280_4014	MRSA	TRUE	1	SCCmec_type_IVa(2B)	SCCmec_type_IVa(2B)	88.97	TRUE
1280_4528	MRSA	TRUE	1	SCCmec_type_IVa(2B)	SCCmec_type_IVa(2B)	89	TRUE
1410763_3	MRSA	TRUE	1	SCCmec_type_IVa(2B)	SCCmec_type_IVa(2B)	88.71	TRUE
1280_17853	MSSA	FALSE	0			0	TRUE
1280_4707	MRSA	TRUE	1	SCCmec_type_IVa(2B)	SCCmec_type_IVa(2B)	88.94	TRUE
1410828_3	MRSA	TRUE	1	SCCmec_type_IVa(2B)	SCCmec_type_IVa(2B)	88.98	TRUE
1280_4669	MRSA	TRUE	1	SCCmec_type_IVa(2B)	SCCmec_type_IVa(2B)	88.81	TRUE
1409443_3	MRSA	TRUE	1	SCCmec_type_IVa(2B)	SCCmec_type_IVa(2B)	86.21	TRUE
1280_3958	MRSA	TRUE	1	SCCmec_type_IVa(2B)	SCCmec_type_IVa(2B)	88.68	TRUE
1409490_3	MRSA	TRUE	1	SCCmec_type_IVa(2B)	SCCmec_type_IVa(2B)	88.55	TRUE
1417178_3	MRSA	TRUE	1	SCCmec_type_IVa(2B)	SCCmec_type_IVa(2B)	88.93	TRUE
1409426_3	MRSA	TRUE	1	SCCmec_type_IVa(2B)	SCCmec_type_IVa(2B)	88.93	TRUE
1280_27464	MRSA	TRUE	1	SCCmec_type_IVa(2B)	SCCmec_type_IVa(2B)	89.06	TRUE
1418275_3	MRSA	TRUE	1	SCCmec_type_IVa(2B)	SCCmec_type_IVa(2B)	88.62	TRUE
1421889_3	MRSA	TRUE	1	SCCmec_type_IVa(2B)	SCCmec_type_IVa(2B)	88.75	TRUE
46170_349	MRSA	TRUE	1	SCCmec_type_IVa(2B)	SCCmec_type_IVa(2B)	88.88	TRUE
46170_352	MRSA	TRUE	1	SCCmec_type_IVa(2B)	SCCmec_type_IVa(2B)	88.82	TRUE
1280_18508	MRSA	TRUE	1	SCCmec_type_IVa(2B)	SCCmec_type_IVa(2B)	88.86	TRUE
1417067_3	MRSA	TRUE	1	SCCmec_type_IVa(2B)	SCCmec_type_IVa(2B)	86.92	TRUE
1280_12451	MSSA	FALSE	0			0	TRUE
1417172_3	MRSA	TRUE	1	SCCmec_type_IVa(2B)	SCCmec_type_IVa(2B)	88.78	TRUE
1417068_3	MRSA	TRUE	1	SCCmec_type_IVa(2B)	SCCmec_type_IVa(2B)	88.99	TRUE
1410905_3	MRSA	TRUE	1	SCCmec_type_IVa(2B)	SCCmec_type_IVa(2B)	88.81	TRUE
1410876_3	MRSA	TRUE	1	SCCmec_type_IVa(2B)	SCCmec_type_IVa(2B)	88.75	TRUE
1280_3860	MRSA	TRUE	1	SCCmec_type_IVa(2B)	SCCmec_type_IVa(2B)	88.49	TRUE
1280_3854	MRSA	TRUE	1	SCCmec_type_IVa(2B)	SCCmec_type_IVa(2B)	91.18	TRUE
1280_3885	MRSA	TRUE	1	SCCmec_type_IVa(2B)	SCCmec_type_IVa(2B)	86.89	TRUE
1157002_3	MRSA	TRUE	1	SCCmec_type_IVa(2B)	SCCmec_type_IVa(2B)	89.1	TRUE
1280_12371	MRSA	TRUE	1	SCCmec_type_IVa(2B)	SCCmec_type_IVa(2B)	88.6	TRUE
1156996_3	MRSA	TRUE	Multiple	SCCmec_type_IV(2B)	SCCmec_type_IV(2B)	88.28	TRUE
1280_2220	MRSA	TRUE	1	SCCmec_type_IVa(2B)	SCCmec_type_IVa(2B)	88.21	TRUE
1280_30798	MRSA	TRUE	1	SCCmec_type_IVa(2B)	SCCmec_type_IVa(2B)	89.03	TRUE
1280_4504	MRSA	TRUE	1	SCCmec_type_IVa(2B)	SCCmec_type_IVa(2B)	88.94	TRUE
1418412_3	MRSA	TRUE	1	SCCmec_type_IVa(2B)	SCCmec_type_IVa(2B)	86.92	TRUE
1280_4731	MSSA	FALSE	0			0	TRUE
1280_4977	MRSA	TRUE	1	SCCmec_type_IVa(2B)	SCCmec_type_IVa(2B)	89.05	TRUE
1280_4931	MSSA	FALSE	0			0	TRUE
1280_24896	MRSA	TRUE	1	SCCmec_type_IVa(2B)	SCCmec_type_IVa(2B)	88.54	TRUE
1280_12293	MRSA	TRUE	1	SCCmec_type_IVa(2B)	SCCmec_type_IVa(2B)	88.92	TRUE
1280_11672	MSSA	FALSE	0			0	TRUE
1418382_3	MRSA	TRUE	1	SCCmec_type_IVa(2B)	SCCmec_type_IVa(2B)	88.81	TRUE
1280_4785	MRSA	TRUE	1	SCCmec_type_IVa(2B)	SCCmec_type_IVa(2B)	88.55	TRUE
1409604_3	MRSA	TRUE	1	SCCmec_type_IVa(2B)	SCCmec_type_IVa(2B)	88.95	TRUE
1280_12587	MRSA	TRUE	1	SCCmec_type_IVa(2B)	SCCmec_type_IVa(2B)	88.88	TRUE
1409487_3	MRSA	TRUE	1	SCCmec_type_IVa(2B)	SCCmec_type_IVa(2B)	88.93	TRUE
1280_3815	MRSA	TRUE	1	SCCmec_type_IVa(2B)	SCCmec_type_IVa(2B)	89	TRUE
1280_18616	MSSA	FALSE	0			0	TRUE
1280_3824	MRSA	TRUE	1	SCCmec_type_IVa(2B)	SCCmec_type_IVa(2B)	86.95	TRUE
1280_25163	MRSA	TRUE	Multiple	SCCmec_type_IV(2B)	SCCmec_type_II(2A)	51.82	FALSE
1410732_3	MRSA	TRUE	1	SCCmec_type_IVa(2B)	SCCmec_type_IVa(2B)	88.32	TRUE
1280_3832	MRSA	TRUE	1	SCCmec_type_IVa(2B)	SCCmec_type_IVa(2B)	87.81	TRUE
1280_18597	MSSA	FALSE	0			0	TRUE
1421885_3	MRSA	TRUE	1	SCCmec_type_IVa(2B)	SCCmec_type_IVa(2B)	88.41	TRUE
1280_4718	MRSA	TRUE	1	SCCmec_type_IVa(2B)	SCCmec_type_IVa(2B)	86.91	TRUE
1410774_3	MRSA	TRUE	1	SCCmec_type_IVa(2B)	SCCmec_type_IVa(2B)	88.87	TRUE
1280_11663	MSSA	FALSE	0			0	TRUE
1280_12446	MSSA	FALSE	0			0	TRUE
1280_11665	MSSA	FALSE	0			0	TRUE
1411584_3	MRSA	TRUE	1	SCCmec_type_IVa(2B)	SCCmec_type_IVa(2B)	88.65	TRUE
1280_30777	MRSA	TRUE	1	SCCmec_type_IVa(2B)	SCCmec_type_IVa(2B)	88.93	TRUE
1280_30805	MRSA	TRUE	1	SCCmec_type_IVa(2B)	SCCmec_type_IVa(2B)	88.93	TRUE
1280_27485	MRSA	TRUE	1	SCCmec_type_IVa(2B)	SCCmec_type_IVa(2B)	88.81	TRUE
1409712_3	MRSA	TRUE	1	SCCmec_type_IVa(2B)	SCCmec_type_IVa(2B)	89.07	TRUE
1280_27491	MRSA	TRUE	1	SCCmec_type_IVa(2B)	SCCmec_type_IVa(2B)	89.04	TRUE
1280_4428	MRSA	TRUE	1	SCCmec_type_IVa(2B)	SCCmec_type_IVa(2B)	88.65	TRUE
1280_11648	MSSA	FALSE	0			0	TRUE
1280_16218	MRSA	TRUE	1	SCCmec_type_IVa(2B)	SCCmec_type_IVa(2B)	88.96	TRUE
1421842_3	MRSA	TRUE	1	SCCmec_type_IVa(2B)	SCCmec_type_IVa(2B)	88.46	TRUE
1280_27499	MRSA	TRUE	1	SCCmec_type_IVa(2B)	SCCmec_type_IVa(2B)	89.06	TRUE
1280_4466	MRSA	TRUE	1	SCCmec_type_IVa(2B)	SCCmec_type_IVa(2B)	88.85	TRUE
1412709_3	MRSA	TRUE	1	SCCmec_type_IVa(2B)	SCCmec_type_IVa(2B)	88.72	TRUE
1409687_3	MRSA	TRUE	1	SCCmec_type_IVa(2B)	SCCmec_type_IVa(2B)	89.04	TRUE
1280_4546	MSSA	FALSE	0			0	TRUE
46170_180	MRSA	TRUE	1	SCCmec_type_IVc(2B)	SCCmec_type_IVc(2B)	93.77	TRUE
1280_28562	MSSA	FALSE	0			0	TRUE
1280_4360	MRSA	TRUE	1	SCCmec_type_IVa(2B)	SCCmec_type_IVa(2B)	89	TRUE
1280_4996	MRSA	TRUE	1	SCCmec_type_IVa(2B)	SCCmec_type_IVa(2B)	88.93	TRUE
1410796_3	MRSA	TRUE	1	SCCmec_type_IVa(2B)	SCCmec_type_IVa(2B)	88.8	TRUE
1280_30763	MRSA	TRUE	1	SCCmec_type_IVa(2B)	SCCmec_type_IVa(2B)	82.79	TRUE
46170_601	MSSA	FALSE	0			0	TRUE
1280_4716	MRSA	TRUE	1	SCCmec_type_IVa(2B)	SCCmec_type_IVa(2B)	88.83	TRUE
1410738_3	MRSA	TRUE	Multiple	SCCmec_type_IVg(2B)	SCCmec_type_IVc(2B)	78.96	FALSE
1412805_3	MRSA	TRUE	1	SCCmec_type_IVa(2B)	SCCmec_type_IVa(2B)	88.86	TRUE
1280_25935	MRSA	TRUE	1	SCCmec_type_IVa(2B)	SCCmec_type_IVa(2B)	86.9	TRUE
1280_4651	MRSA	TRUE	1	SCCmec_type_IVa(2B)	SCCmec_type_IVa(2B)	87.92	TRUE
1280_4543	MRSA	TRUE	1	SCCmec_type_IVa(2B)	SCCmec_type_IVa(2B)	87.95	TRUE
1280_8094	MSSA	FALSE	0			0	TRUE
1280_12300	MRSA	TRUE	1	SCCmec_type_IVa(2B)	SCCmec_type_IVa(2B)	88.98	TRUE
1409721_3	MRSA	TRUE	1	SCCmec_type_IVa(2B)	SCCmec_type_IVa(2B)	88.88	TRUE
1417157_3	MRSA	TRUE	1	SCCmec_type_IVa(2B)	SCCmec_type_IVa(2B)	88.62	TRUE
1280_4650	MSSA	FALSE	0			0	TRUE
1280_25690	MSSA	FALSE	0			0	TRUE
1280_12552	MRSA	TRUE	1	SCCmec_type_IVa(2B)	SCCmec_type_IVa(2B)	88.8	TRUE
1280_3996	MRSA	TRUE	1	SCCmec_type_IVa(2B)	SCCmec_type_IVa(2B)	88.94	TRUE
1280_30795	MRSA	TRUE	1	SCCmec_type_IVa(2B)	SCCmec_type_IVa(2B)	88.76	TRUE
1410914_3	MRSA	TRUE	1	SCCmec_type_IVa(2B)	SCCmec_type_IVa(2B)	88.87	TRUE
1280_3941	MRSA	TRUE	1	SCCmec_type_IVa(2B)	SCCmec_type_IVa(2B)	86.95	TRUE
1280_4788	MSSA	FALSE	0			0	TRUE
1280_16166	MRSA	TRUE	1	SCCmec_type_IVa(2B)	SCCmec_type_IVa(2B)	88.89	TRUE
1280_4048	MRSA	TRUE	1	SCCmec_type_IVa(2B)	SCCmec_type_IVa(2B)	86.94	TRUE
1280_18111	MRSA	TRUE	Multiple	SCCmec_type_IV(2B)	SCCmec_type_II(2A)	50.64	FALSE
1418413_3	MRSA	TRUE	1	SCCmec_type_IVa(2B)	SCCmec_type_IVa(2B)	88.66	TRUE
1280_4655	MRSA	TRUE	1	SCCmec_type_IVa(2B)	SCCmec_type_IVa(2B)	88.93	TRUE
1280_4005	MRSA	TRUE	1	SCCmec_type_IVa(2B)	SCCmec_type_IVa(2B)	88.64	TRUE
1412678_3	MRSA	TRUE	1	SCCmec_type_IVa(2B)	SCCmec_type_IVa(2B)	88.67	TRUE
1410726_3	MRSA	TRUE	1	SCCmec_type_IVa(2B)	SCCmec_type_IVa(2B)	88.81	TRUE
1280_27461	MRSA	TRUE	1	SCCmec_type_IVa(2B)	SCCmec_type_IVa(2B)	89.06	TRUE
1280_12424	MRSA	TRUE	1	SCCmec_type_IVa(2B)	SCCmec_type_IVa(2B)	88.74	TRUE
1280_4443	MRSA	TRUE	1	SCCmec_type_IVa(2B)	SCCmec_type_IVa(2B)	88.17	TRUE
1280_3992	MRSA	TRUE	1	SCCmec_type_IVa(2B)	SCCmec_type_IVa(2B)	86.95	TRUE
1280_11671	MSSA	FALSE	0			0	TRUE
1280_4440	MRSA	TRUE	1	SCCmec_type_IVa(2B)	SCCmec_type_IVa(2B)	88.7	TRUE
1280_4970	MRSA	TRUE	1	SCCmec_type_IVa(2B)	SCCmec_type_IVa(2B)	89.02	TRUE
1409366_3	MRSA	TRUE	1	SCCmec_type_IVa(2B)	SCCmec_type_IVa(2B)	88.88	TRUE
904779_3	MRSA	TRUE	1	SCCmec_type_IVa(2B)	SCCmec_type_IVa(2B)	88.93	TRUE
1280_25138	MRSA	TRUE	1	SCCmec_type_IVa(2B)	SCCmec_type_IVa(2B)	87.77	TRUE
1280_3805	MSSA	FALSE	0			0	TRUE
1412623_3	MRSA	TRUE	1	SCCmec_type_IVa(2B)	SCCmec_type_IVa(2B)	88.89	TRUE
1410771_3	MRSA	TRUE	1	SCCmec_type_IVa(2B)	SCCmec_type_IVa(2B)	88.86	TRUE
1280_30866	MRSA	TRUE	1	SCCmec_type_IVa(2B)	SCCmec_type_IVa(2B)	88.94	TRUE
1280_3978	MRSA	TRUE	1	SCCmec_type_IVa(2B)	SCCmec_type_IVa(2B)	88.84	TRUE
1417181_3	MRSA	TRUE	1	SCCmec_type_IVa(2B)	SCCmec_type_IVa(2B)	89.06	TRUE
1280_4542	MRSA	TRUE	1	SCCmec_type_IVa(2B)	SCCmec_type_IVa(2B)	86.91	TRUE
1280_4432	MSSA	FALSE	0			0	TRUE
1409461_3	MRSA	TRUE	1	SCCmec_type_IVa(2B)	SCCmec_type_IVa(2B)	88.31	TRUE
1280_11669	MSSA	FALSE	0			0	TRUE
1417044_3	MRSA	TRUE	1	SCCmec_type_IVa(2B)	SCCmec_type_IVa(2B)	88.95	TRUE
1280_4427	MRSA	TRUE	1	SCCmec_type_IVa(2B)	SCCmec_type_IVa(2B)	88.62	TRUE
1280_4036	MRSA	TRUE	1	SCCmec_type_IVa(2B)	SCCmec_type_IVa(2B)	86.93	TRUE
1280_4982	MSSA	FALSE	0			0	TRUE
1417093_3	MRSA	TRUE	1	SCCmec_type_IVa(2B)	SCCmec_type_IVa(2B)	88.56	TRUE
1417066_3	MRSA	TRUE	1	SCCmec_type_IVa(2B)	SCCmec_type_IVa(2B)	88.86	TRUE
1280_3921	MRSA	TRUE	1	SCCmec_type_IVa(2B)	SCCmec_type_IVa(2B)	86.94	TRUE
1421874_3	MRSA	TRUE	1	SCCmec_type_IVa(2B)	SCCmec_type_IVa(2B)	89	TRUE
1409544_3	MRSA	TRUE	1	SCCmec_type_IVa(2B)	SCCmec_type_IVa(2B)	89	TRUE
46170_1188	MRSA	TRUE	1	SCCmec_type_Vb(5C2&5)	SCCmec_type_Vb(5C2&5)	86.38	TRUE
1280_24795	MRSA	TRUE	Multiple	SCCmec_type_IV(2B)	SCCmec_type_II(2A)	51.88	FALSE
1418315_3	MRSA	TRUE	1	SCCmec_type_IVa(2B)	SCCmec_type_IVa(2B)	88.73	TRUE
1280_7310	MRSA	TRUE	1	SCCmec_type_IVa(2B)	SCCmec_type_IVa(2B)	86.71	TRUE
1412625_3	MRSA	TRUE	1	SCCmec_type_IVa(2B)	SCCmec_type_IVa(2B)	88.72	TRUE
1410739_3	MRSA	TRUE	1	SCCmec_type_IVa(2B)	SCCmec_type_IVa(2B)	88.71	TRUE
1280_12305	MRSA	TRUE	1	SCCmec_type_IVa(2B)	SCCmec_type_IVa(2B)	88.94	TRUE
1421858_3	MRSA	TRUE	1	SCCmec_type_IVa(2B)	SCCmec_type_IVa(2B)	88.56	TRUE
1280_4404	MSSA	FALSE	0			0	TRUE
1280_27478	MRSA	TRUE	1	SCCmec_type_IVa(2B)	SCCmec_type_IVa(2B)	89.01	TRUE
46170_200	MSSA	FALSE	0			0	TRUE
46170_610	MSSA	FALSE	0			0	TRUE
1410897_3	MRSA	TRUE	1	SCCmec_type_IVa(2B)	SCCmec_type_IVa(2B)	88.22	TRUE
1409511_3	MRSA	TRUE	1	SCCmec_type_IVa(2B)	SCCmec_type_IVa(2B)	88.81	TRUE
1410887_3	MRSA	TRUE	1	SCCmec_type_IVa(2B)	SCCmec_type_IVa(2B)	88.98	TRUE
1280_27620	MSSA	FALSE	0			0	TRUE
1409394_3	MRSA	TRUE	1	SCCmec_type_IVa(2B)	SCCmec_type_IVa(2B)	88.6	TRUE
1280_4834	MSSA	FALSE	0			0	TRUE
1280_4730	MRSA	TRUE	1	SCCmec_type_IVa(2B)	SCCmec_type_IVa(2B)	88.94	TRUE
1280_16200	MRSA	TRUE	1	SCCmec_type_IVc(2B)	SCCmec_type_IVc(2B)	93.84	TRUE
1417150_3	MRSA	TRUE	1	SCCmec_type_IVa(2B)	SCCmec_type_IVa(2B)	88.69	TRUE
1280_18512	MRSA	TRUE	1	SCCmec_type_IVa(2B)	SCCmec_type_IVa(2B)	89	TRUE
46170_502	MRSA	TRUE	1	SCCmec_type_IVa(2B)	SCCmec_type_IVa(2B)	89.01	TRUE
1412744_3	MRSA	TRUE	1	SCCmec_type_IVa(2B)	SCCmec_type_IVa(2B)	89.02	TRUE
1280_12525	MSSA	FALSE	0			0	TRUE
1280_27489	MRSA	TRUE	1	SCCmec_type_IVa(2B)	SCCmec_type_IVa(2B)	89.03	TRUE
1410710_3	MRSA	TRUE	1	SCCmec_type_IVa(2B)	SCCmec_type_IVa(2B)	88.87	TRUE
1410829_3	MRSA	TRUE	1	SCCmec_type_IVa(2B)	SCCmec_type_IVa(2B)	86.34	TRUE
1280_3975	MRSA	TRUE	1	SCCmec_type_IVc(2B)	SCCmec_type_IVc(2B)	93.74	TRUE
1421862_3	MRSA	TRUE	1	SCCmec_type_IVa(2B)	SCCmec_type_IVa(2B)	88.75	TRUE
1280_5376	MRSA	TRUE	1	SCCmec_type_IVa(2B)	SCCmec_type_IVa(2B)	88.16	TRUE
1280_4047	MRSA	TRUE	1	SCCmec_type_IVa(2B)	SCCmec_type_IVa(2B)	88.88	TRUE
1412719_3	MRSA	TRUE	1	SCCmec_type_IVa(2B)	SCCmec_type_IVa(2B)	88.78	TRUE
1280_4064	MSSA	FALSE	0			0	TRUE
1280_4412	MSSA	FALSE	0			0	TRUE
1280_4768	MRSA	TRUE	1	SCCmec_type_IVa(2B)	SCCmec_type_IVa(2B)	88.78	TRUE
1280_19112	MRSA	TRUE	Multiple	SCCmec_type_IV(2B)	SCCmec_type_II(2A)	50.62	FALSE
1409608_3	MRSA	TRUE	1	SCCmec_type_IVa(2B)	SCCmec_type_IVa(2B)	88.87	TRUE
1280_3933	MRSA	TRUE	1	SCCmec_type_IVa(2B)	SCCmec_type_IVa(2B)	89	TRUE
1417078_3	MRSA	TRUE	1	SCCmec_type_IVa(2B)	SCCmec_type_IVa(2B)	88.94	TRUE
1280_16926	MRSA	TRUE	1	SCCmec_type_VI(4B)	SCCmec_type_VI(4B)	95.78	TRUE
1280_9978	MSSA	FALSE	0			0	TRUE
1410853_3	MRSA	TRUE	Multiple	SCCmec_type_IV(2B)	SCCmec_type_II(2A)	50.03	FALSE
1280_4433	MRSA	TRUE	1	SCCmec_type_IVa(2B)	SCCmec_type_IVa(2B)	88.91	TRUE
